# Supplementary material for: Transcriptome and metabolome analyses provide insights into the relevance of pericarp thickness variations in Camellia drupifera and Camellia oleifera
Source: Front Plant Sci. 2022 Oct 27;13:1016475. doi: 10.3389/fpls.2022.1016475 (PMC9647060; doi:10.3389/fpls.2022.1016475)
Supplement: Supplementary Table 1 — Result of RT-PCR. [file Table_1.xlsx]

## Sheet: Primer information
Camellia oleifera-TR12121-F1	AAAGGCTGACAATTACGCGG
Camellia oleifera-TR12121-R1	TGTGAATTTGGGCAGCCGAT
Camellia oleifera-TR60905-F1	TGCTTTGACATCAGGCGAGT
Camellia oleifera-TR60905-R1	GGGTGGTCCGAATGGTTCAT
Camellia oleifera-TR30606-F2	GGTCAATGCTTGGTGGTTGG
Camellia oleifera-TR30606-R2	GTATGATCCCCGGACAGCTC
Camellia oleifera-TR61738-F3	TTCAGAAGGCTGGTGTGGAG
Camellia oleifera-TR61738-R3	AGTTGGGCTTATCGGCATCC
Camellia oleifera-K22395-F1	GAGTGGAGGCCATGACTACG
Camellia oleifera-K22395-R1	AGCGCTTCTGCCCTTTATGT
Camellia oleifera-TR4908-F1	TCACTGTGCTACAAGGGCTG
Camellia oleifera-TR4908-R1	GCCAGTTAAGACTCCAGCGA
Camellia oleifera-TR8423-F1	CGGGCCTACTGGAGAAATCC
Camellia oleifera-TR8423-R1	CACGGCGAGTATGTTAGCCT
Camellia oleifera-TR389-F1	GTTCCTCGAGCAGCAGAACT
Camellia oleifera-TR389-R1	ACACCAATAGGCTCACGCAA

## Sheet: Sample loading order
	20211117-3
	1	2	3	4	5	6	7	8	9	10	11	12	13	14	15	16	17	18	19	20	21	22	23	24
gene	K22395			TR4908			TR12121-1			TR60905-1			TR30606-2			TR8423			TR61738-3			TR389
A	BG_1			BG_1			BG_1			BG_1			BG_1			BG_1			BG_1			BG_1
B	BG_2			BG_2			BG_2			BG_2			BG_2			BG_2			BG_2			BG_2
C	BG_3			BG_3			BG_3			BG_3			BG_3			BG_3			BG_3			BG_3
D	SG_1			SG_1			SG_1			SG_1			SG_1			SG_1			SG_1			SG_1
E	SG_2			SG_2			SG_2			SG_2			SG_2			SG_2			SG_2			SG_2
F	SG_3			SG_3			SG_3			SG_3			SG_3			SG_3			SG_3			SG_3

## Sheet: raw result
sample	gene	Ctmean	ΔCT	ΔΔCT	RQ（2-ΔΔCT）	FPKM
BG_1	GAPDH	25.0932
BG_2	GAPDH	22.4059
BG_3	GAPDH	24.8757
SG_1	GAPDH	23.3422
SG_2	GAPDH	22.5487
SG_3	GAPDH	24.9577
BG_1	bgIB	30.5778	5.48465	0.0046522	0.996781	1.75
BG_2	bgIB	27.6436	5.23772	-0.242279	1.18286	2.97
BG_3	bgIB	30.6676	5.79186	0.311864	0.8056	0.4
SG_1	bgIB	25.948	2.60575	-2.87425	7.3322	6.76
SG_2	bgIB	25.1673	2.61864	-2.86136	7.267	11.91
SG_3	bgIB	26.3667	1.409	-4.071	16.8071	11.02
BG_1	CSE	25.9544	0.861163	0.00116346	0.999194	24.19
BG_2	CSE	24.3121	1.90618	1.04618	0.484249	29.82
BG_3	CSE	26.3104	1.43471	0.57471	0.671421	18.03
SG_1	CSE	28.5401	5.19786	4.33786	0.0494509	1.27
SG_2	CSE	29.7673	7.21864	6.35864	0.0121859	0.79
SG_3	CSE	28.6501	3.69236	2.83236	0.140402	2.02
BG_1	CAD	27.7724	2.67926	-0.000744197	1.00052	24.62
BG_2	CAD	25.2591	2.85321	0.173211	0.886867	13.41
BG_3	CAD	28.0352	3.15954	0.479538	0.717207	13.39
SG_1	CAD	23.0731	-0.269084	-2.94908	7.72259	51.49
SG_2	CAD	22.4376	-0.111078	-2.79108	6.92147	80.17
SG_3	CAD	24.0422	-0.915536	-3.59554	12.0883	59.48
BG_1	PAL1	31.2288	6.13558	-0.00441676	1.00307	1.32
BG_2	PAL1	29.3597	6.95379	0.813786	0.568887	1.04
BG_3	PAL1	31.4096	6.53385	0.39385	0.761096	0.91
SG_1	PAL1	25.4435	2.10126	-4.03874	16.4354	4.94
SG_2	PAL1	22.8069	0.258194	-5.88181	58.9658	21.9
SG_3	PAL1	25.2791	0.321373	-5.81863	56.4393	10.86
BG_1	PAL2	27.8228	2.72958	-0.000418167	1.00029	7.27
BG_2	PAL2	24.9452	2.53933	-0.190675	1.1413	7.31
BG_3	PAL2	30.0256	5.14991	2.41991	0.186867	0.61
SG_1	PAL2	21.748	-1.59424	-4.32424	20.032	47.78
SG_2	PAL2	19.9795	-2.56918	-5.29918	39.3743	141.04
SG_3	PAL2	22.0293	-2.92848	-5.65848	50.5093	46.55
BG_1	REF1	30.5103	5.41708	-0.00292389	1.00203	12.15
BG_2	REF1	27.5167	5.11083	-0.30917	1.23899	11.32
BG_3	REF1	30.1439	5.26825	-0.151753	1.11092	11.69
SG_1	REF1	28.7661	5.42385	0.00384529	0.997338	5.43
SG_2	REF1	28.7382	6.18957	0.769569	0.586593	4.91
SG_3	REF1	29.5158	4.5581	-0.861899	1.81743	6.27
BG_1	C4H	31.4439	6.35069	0.000694021	0.999519	0
BG_2	C4H	29.7241	7.31825	0.968248	0.511126	0
BG_3	C4H	31.5603	6.68456	0.334556	0.793028	0
SG_1	C4H	24.6356	1.29342	-5.05658	33.28	15.78
SG_2	C4H	21.8136	-0.735051	-7.08505	135.773	62.3
SG_3	C4H	26.937	1.97923	-4.37077	20.6887	6.24
BG_1	CCoAOMT	30.8192	5.72598	-0.00402496	1.00279	0.45
BG_2	CCoAOMT	33.138	10.7321	5.00209	0.0312047	0.09
BG_3	CCoAOMT	32.5951	7.71937	1.98937	0.25185	0
SG_1	CCoAOMT	22.8956	-0.446616	-6.17662	72.3347	33.23
SG_2	CCoAOMT	22.6379	0.0892067	-5.64079	49.894	35.61
SG_3	CCoAOMT	22.6447	-2.313	-8.043	263.744	46.67
