# Supplementary material for: Transcriptome and metabolome analyses provide insights into the relevance of pericarp thickness variations in Camellia drupifera and Camellia oleifera
Source: Front Plant Sci. 2022 Oct 27;13:1016475. doi: 10.3389/fpls.2022.1016475 (PMC9647060; doi:10.3389/fpls.2022.1016475)
Supplement: Supplementary Table 2 — Analysis of the identified metabolite profiles between BG and SG. [file Table_2.xlsx]

## Sheet: Sheet1
The analysis of the identified metabolite profiles between BG and SG.
SuperClass	M_ID	adduct	m/z	rt(s)	BG_1	BG_2	BG_3	SG_1	SG_2	SG_3	VIP	p-value	fold change(BG/SG)	KEGG.ID	Class	SubClass	DirectParent
Lipids and lipid-like molecules	Citramalic acid	(M+H)+	149.044	390.103	1061.2	1684.46	901.645	61156	60082.8	59402.3	0.530824	4.99261e-08	0.0201909	C00815	Fatty Acyls	Fatty acids and conjugates	Hydroxy fatty acids
Organic oxygen compounds	Linalool oxide	(M+H-H2O)+	153.126	192.19	8882.8	10040.3	9121.18	57473.9	55803.3	57602.9	1.26309	2.47211e-07	0.164117	0	0	0	0
organic hydroxy compound	Phenol	(M+H)+	95.0481	337.41	18218.6	19432.6	19566.3	5355.62	4577.23	5715.76	0.786208	1.41773e-05	3.6564	C00146/C15584	Phenols	1-hydroxy-4-unsubstituted benzenoids	1-hydroxy-4-unsubstituted benzenoids
organic hydroxy compound	Pyrocatechol	(M+H)+	111.043	337.41	26344.3	27671.2	27891.8	12527.2	13116	11912.4	0.876301	1.55992e-05	2.18096	C00090	0	0	0
Organic oxygen compounds	Isomaltose	(M-H2O-H)-	323.097	327.846	2933.26	3459.67	2637.8	17458	15363.4	16519.2	0.34827	3.26872e-05	0.183029	C00252	Organooxygen compounds	Carbohydrates and carbohydrate conjugates	O-glycosyl compounds
organic hydroxy compound	1,3,5-Benzenetriol	(M+H)+	127.038	363.067	143463	185940	155948	440856	417928	427316	2.71096	4.78773e-05	0.377382	0	0	0	0
Organoheterocyclic compounds	D-Glucono-1,5-lactone	(M-H2O-H)-	159.029	327.26	84343.3	88458.7	100321	7578.35	8835.86	8258.45	0.509285	6.64126e-05	11.0699	0	Lactones	0	0
Organic oxygen compounds	Fludrocortisone acetate	(M-H)-	421.206	183.191	5093.92	5118.5	5145.44	46735.3	43814	52671.2	0.506771	8.17832e-05	0.107232	0	Organooxygen compounds	0	0
Organic oxygen compounds	4-Hydroxybenzoate	(M+H)+	139.038	337.1	30823.7	33199.5	35248.4	11160.6	9104.34	11769.4	1.02275	0.000120433	3.09892	C00156	Benzene and substituted derivatives	Benzoic acids and derivatives	Hydroxybenzoic acid derivatives
Organic oxygen compounds	Ginsenoside Rb1	(M-H)-	1107.57	260.062	1234.27	1257.65	649.061	29319.9	23390.3	25872.3	0.409694	0.000130484	0.0399706	0	Organooxygen compounds	0	0
Organic oxygen compounds	Ribitol	(M-H2O-H)-	133.05	277.74	29802.6	48901	47182.2	677533	561882	697548	2.21784	0.000145572	0.0649913	C00474	Organooxygen compounds	Carbohydrates and carbohydrate conjugates	Sugar alcohols
Organic nitrogen compounds	Phosphorylcholine	(M+H)+	184.072	486.703	286989	264072	311247	48098.1	77719.6	57112	3.02992	0.000151813	4.71388	C00588	Organonitrogen compounds	Quaternary ammonium salts	Phosphocholines
Organic acids and derivatives	Quinic acid	(2M-H)-	383.119	335.247	3.08921e+07	3.53943e+07	3.73798e+07	7.35697e+06	4.98056e+06	5.91801e+06	13.2048	0.000152854	5.67862	0	Hydroxy acids and derivatives	0	0
Organoheterocyclic compounds	4-Pyridoxic acid	(M+H)+	184.06	43.543	8279.23	25058.4	15961.9	135460	117139	138986	1.89168	0.000164506	0.125898	C00847	Pyridines and derivatives	Pyridinecarboxylic acids and derivatives	Pyridinecarboxylic acids
Phenylpropanoids and polyketides	Peonidin 3-galactoside cation	M+	463.123	131.218	52137.1	78807.8	60129.5	215565	219691	246623	2.21837	0.000199311	0.280217	0	0	0	0
Lipids and lipid-like molecules	Citraconic acid	(M-H)-	129.019	422.125	14950.7	23454.2	17357.7	105706	131439	124882	0.948277	0.000230845	0.154029	C02226	Fatty Acyls	Fatty acids and conjugates	Methyl-branched fatty acids
Organoheterocyclic compounds	5-Hydroxytryptophol (5HTOL)	(M+CH3COO+2H)+	238.107	287.079	1658.49	1471.89	1817.22	2956.48	3143.2	3070.26	0.0412313	0.000244178	0.539545	0	0	0	0
Phenylpropanoids and polyketides	Topotecan	(M+H-H2O)+	404.152	352.056	22707.8	32075.6	28370.2	70032.8	66342.2	64262.5	0.911203	0.00025728	0.414448	0	0	0	0
Organic acids and derivatives	Phenylpyruvate	(M+CH3COO)-	223.061	278.466	222809	208975	269326	15318.1	8339.65	4881.1	0.951722	0.000266567	24.5669	C00166	Benzene and substituted derivatives	Phenylpyruvic acid derivatives	Phenylpyruvic acid derivatives
Organic oxygen compounds	Maltotriose	(M+NH4)+	522.202	424.427	5226.38	3378.56	2584.41	103101	81182.2	105118	1.61295	0.000273141	0.0386637	C01835	Organooxygen compounds	Carbohydrates and carbohydrate conjugates	Oligosaccharides
Organic nitrogen compounds	Phytosphingosine	(M+H)+	318.299	145.966	134737	165297	141723	33226.6	36552.7	36192	1.98142	0.000273813	4.16864	C12144	Organonitrogen compounds	Amines	"1,3-aminoalcohols"
Organic acids and derivatives	Maslinic Acid	(M+H-H2O)+	455.351	35.793	46336.1	112737	89414.5	384394	385541	341764	2.74429	0.000286686	0.22352	0	0	0	0
Organoheterocyclic compounds	Kaempferol 3-O-rutinoside	(M+H)+	595.161	372.763	1195.66	1406.51	1302.89	4220.51	3603.72	3603.96	0.183633	0.000305424	0.341705	0	0	0	0
Organic oxygen compounds	D-Allose	(M+CH3COO)-	239.077	341.861	531814	691884	611396	77814.6	57034.7	43379.3	1.40212	0.000307103	10.2963	C01487	Organooxygen compounds	Carbohydrates and carbohydrate conjugates	Hexoses
Organic acids and derivatives	L-Malic acid	(M-H)-	133.014	386.901	6.04348e+06	6.546e+06	6.68962e+06	3.62751e+06	3.04364e+06	3.04334e+06	4.59566	0.000321528	1.98457	C00149	Hydroxy acids and derivatives	Beta hydroxy acids and derivatives	Beta hydroxy acids and derivatives
Organoheterocyclic compounds	Flavin mononucleotide (FMN)	(M-H)-	455.1	33.926	171198	135705	167003	17625.5	30175.1	17064.6	0.758831	0.000340756	7.30601	C00061	Flavin nucleotides	0	Flavin nucleotides
Organoheterocyclic compounds	Adenosine monophosphate (AMP)	(M+H)+	348.069	431.456	7984.43	11350.2	10121.7	23188	23908.4	21692.1	0.428477	0.000373636	0.428217	C00020	Purine nucleotides	Purine ribonucleotides	Purine ribonucleoside monophosphates
organic amino compound	Leu-Val	(M+H)+	260.16	288.401	945.704	1155.35	688.227	6254.9	5858.93	4851.96	0.169014	0.000421955	0.164406	0	0	0	0
Phenylpropanoids and polyketides	Malvidin 3-O-galactoside cation	(M+NH4)+	511.161	415.447	6330.97	13987.2	7038.13	39041.9	37882.5	35505	0.814332	0.000435476	0.24332	0	0	0	0
Phenylpropanoids and polyketides	Procyanidin C1	(M-H)-	865.2	261.607	1.61259e+06	1.35149e+06	1.76567e+06	220534	222055	316039	2.6774	0.0004496	6.23462	C17624	Flavonoids	Biflavonoids and polyflavonoids	Biflavonoids and polyflavonoids
Organic nitrogen compounds	L-Carnitine	(M+H)+	162.111	393.611	6166.87	8380.12	7242.4	15899.9	14479.1	14961.6	0.310265	0.000503536	0.480571	C00318	Organonitrogen compounds	Quaternary ammonium salts	Carnitines
Organic oxygen compounds	Alpha-D-Glucose	(M-H2O-H)-	161.045	48.276	153636	150929	126037	49053.7	32900.7	34320.5	0.63027	0.000504353	3.7033	C00267	Organooxygen compounds	Carbohydrates and carbohydrate conjugates	Hexoses
Organic oxygen compounds	Glutaraldehyde	(M+H-H2O)+	83.0482	337.252	11782.7	13233.2	11760.2	3154.89	5020.21	4871.73	0.61104	0.000511094	2.81878	0	0	0	0
Phenylpropanoids and polyketides	3-(3-Hydroxyphenyl)propanoic acid	(M+H-H2O)+	149.058	300.854	26911.8	24289.8	30888.3	7519.58	7640.74	8201.35	0.961924	0.00053152	3.51387	C11457	Phenylpropanoic acids	0	Phenylpropanoic acids
Phenylpropanoids and polyketides	Procyanidin B2	(M+H)+	579.149	90.158	2.23426e+06	2.24278e+06	2.82745e+06	329381	204525	470622	0.641478	0.000570719	7.27157	C17639	Flavonoids	Biflavonoids and polyflavonoids	Biflavonoids and polyflavonoids
organic amino compound	Acetyl-DL-Valine	(M+H)+	166.085	256.76	13356.4	28517.4	22401.2	84035.3	72125	83651.8	0.62172	0.000575622	0.268022	C00079	Carboxylic acids and derivatives	"Amino acids, peptides, and analogues"	Phenylalanine and derivatives
Organic oxygen compounds	Glyceric acid	(M-H)-	105.019	301.534	594940	739424	772051	162079	77632.8	102482	1.51995	0.000603943	6.15561	C00258	Organooxygen compounds	Carbohydrates and carbohydrate conjugates	Sugar acids and derivatives
organic hydroxy compound	Sinapyl alcohol	(M+H)+	211.095	39.865	249029	245837	240787	126833	80754.8	82441.3	2.4826	0.000626296	2.53648	C02325	Phenols	Methoxyphenols	Methoxyphenols
organic amino compound	N-Acetyl-L-alanine	(M+H)+	90.0538	345.766	52607	199001	79092.4	978233	754018	910985	0.283932	0.000656876	0.125112	C00041	Carboxylic acids and derivatives	"Amino acids, peptides, and analogues"	Alanine and derivatives
Organoheterocyclic compounds	Indoleacetic acid	(M+H)+	176.069	325.404	2075.75	3430.65	1864.89	12257.7	15965.5	15463.1	0.559944	0.000657495	0.168732	C00954	Indoles and derivatives	Indolyl carboxylic acids and derivatives	Indole-3-acetic acid derivatives
Organic oxygen compounds	D-Mannose 1-phosphate	(M-H)-	259.022	476.836	41190.1	35454.5	39833.5	16417.9	9676.1	8997.44	0.300821	0.000759994	3.31927	C00636	Organooxygen compounds	Carbohydrates and carbohydrate conjugates	Monosaccharide phosphates
Phenylpropanoids and polyketides	Harmane	(M-H+2Na)+	227.052	298.334	1252.28	1396.47	776.904	6528.97	5075.19	5312.63	0.358155	0.000768204	0.2025	0	0	0	0
organic amino compound	Val-Ser	(M-H)-	130.051	382.088	4753.09	5169.38	7136.37	16588.4	15862.8	14003.5	2.30135	0.000773188	0.367215	0	Carboxylic acids and derivatives	"Amino acids, peptides, and analogues"	N-acyl-L-alpha-amino acids
Organic acids and derivatives	2-Furancarboxylic acid	(M+H)+	113.022	118.9	48794.2	60365	52718.7	21928.2	16089.6	20691.8	1.15893	0.000854612	2.75727	0	0	0	0
Organic acids and derivatives	cis-Aconitate	(M-H)-	173.009	440.253	106753	271452	148175	662264	751968	661503	2.26783	0.000871357	0.253588	C00417	Carboxylic acids and derivatives	Tricarboxylic acids and derivatives	Tricarboxylic acids and derivatives
Organic oxygen compounds	L-Fucose	(2M-H)-	327.129	251.498	11778	18164.7	12934.4	65694.5	49999	58627.7	0.560298	0.000896319	0.245966	C01019	Organooxygen compounds	Carbohydrates and carbohydrate conjugates	Hexoses
Organic oxygen compounds	2'-Deoxy-D-ribose	(M+CH3COO)-	193.071	287.755	13846.1	28482.6	21257.4	100071	106209	81843.2	0.775099	0.000896819	0.22069	C01801	Organooxygen compounds	Carbohydrates and carbohydrate conjugates	Pentoses
Organoheterocyclic compounds	Indolelactic acid	(2M+Na)+	433.146	125.077	173783	197397	191098	123042	108881	111993	2.00587	0.000916935	1.63492	C02043	Indoles and derivatives	Indolyl carboxylic acids and derivatives	Indolyl carboxylic acids and derivatives
Organic oxygen compounds	D-Glucuronate	(M-H)-	193.036	339.666	55182.6	68751.4	53199.2	5263.02	13692.6	12181	0.442713	0.000921885	5.6889	C00191	Organooxygen compounds	Carbohydrates and carbohydrate conjugates	Glucuronic acid derivatives
Organic oxygen compounds	Prunasin	M+	295.102	176.894	44384.2	79639.1	57500.9	268235	213787	221601	2.20714	0.000936365	0.257985	C00844	Organooxygen compounds	Carbohydrates and carbohydrate conjugates	Cyanogenic glycosides
Organic acids and derivatives	5-Aminolevulinic acid	(M+H)+	132.064	408.536	1681.54	3043.57	1863.31	100518	74485.5	70975.7	1.46329	0.00102501	0.0267844	C00430	Carboxylic acids and derivatives	"Amino acids, peptides, and analogues"	Delta amino acids and derivatives
Organic oxygen compounds	Perseitol	(M+Na-2H)-	233.066	63.143	300060	226972	333852	20571	21802	16394.8	1.28201	0.00106702	14.6489	0	Organooxygen compounds	0	0
Organic acids and derivatives	D-Aspartic acid	(M-H)-	132.03	345.303	1364.78	1101.43	1708.24	9752.61	11692.2	14013.4	0.294203	0.00110826	0.117729	C00402	Carboxylic acids and derivatives	"Amino acids, peptides, and analogues"	Aspartic acid and derivatives
Organoheterocyclic compounds	4-Hydroxybutanoic acid lactone	(M+H)+	87.043	357.017	2006.48	2636.97	3804.37	7224.36	8049.87	7449.46	0.337746	0.001214	0.371763	0	organic heteromonocyclic compound	oxolanes	0
Organic acids and derivatives	N-Acetyl-L-aspartic acid	(M+Na)+	198.037	382.759	20768.3	116013	34125.2	761521	534996	713506	1.76809	0.00122422	0.0850273	C01042	Carboxylic acids and derivatives	"Amino acids, peptides, and analogues"	Aspartic acid and derivatives
organic amino compound	Miglitol	(M+H)+	230.113	335.991	7761.72	6921.85	6805.42	33395.3	41415.2	29934.4	0.237131	0.0012451	0.205156	0	0	0	0
Organoheterocyclic compounds	S-Methyl-5'-thioadenosine	(M+H)+	298.096	98.185	64597.7	40072.4	56108.7	131985	164220	150060	1.44463	0.00127496	0.360277	C00170	5'-deoxyribonucleosides	5'-deoxy-5'-thionucleosides	5'-deoxy-5'-thionucleosides
Organic nitrogen compounds	3-Guanidinopropanoate	(M+H)+	132.076	355.361	11822.1	14333.8	13708.4	19679.8	19565.6	19093	0.259799	0.00136505	0.683327	0	0	0	0
organic hydroxy compound	DL-Mandelic acid	(M-H)-	151.039	261.887	25507.5	21331.7	30214.2	6004.61	4318.58	3691.54	0.335973	0.00138309	5.49803	C01984	Benzene and substituted derivatives	0	Benzene and substituted derivatives
Organic oxygen compounds	L-Iditol	(M+H)+	183.085	406.695	30337.1	47545.7	34928.7	115284	100176	91958.4	1.30062	0.00161973	0.366965	C01507	Organooxygen compounds	Carbohydrates and carbohydrate conjugates	Sugar alcohols
organic hydroxy compound	3-(2-Hydroxyphenyl)propionic acid	(M+CH3CN+H)+	208.096	193.074	4052.58	5804.05	6102.57	10525	11284.9	10207.3	0.390889	0.00170148	0.498457	0	phenols	0	0
Organic acids and derivatives	Homocitrate	(M-H)-	205.035	461.403	373186	442391	459792	227476	195185	222554	0.913988	0.00175697	1.97666	C01251	Carboxylic acids and derivatives	Tricarboxylic acids and derivatives	Tricarboxylic acids and derivatives
Organic oxygen compounds	D-Ribose	(M-H)-	149.044	96.227	28921.2	24022.9	24034	41988.3	47614.3	41973.7	0.419922	0.00185569	0.585046	C00121/C21057	Organooxygen compounds	Carbohydrates and carbohydrate conjugates	Pentoses
Organic acids and derivatives	alpha-ketoglutarate	(M-H)-	145.014	370.685	118669	209416	166577	1.0638e+06	1.06949e+06	1.48697e+06	3.05255	0.00186388	0.136637	C00026	Keto acids and derivatives	Gamma-keto acids and derivatives	Gamma-keto acids and derivatives
Phenylpropanoids and polyketides	Caffeic Acid	(M+H-H2O)+	163.038	129.49	12315.6	14165.1	13661.8	9549.2	8782.35	8964.03	0.225507	0.00202013	1.47066	C01197/C01481	Cinnamic acids and derivatives	Hydroxycinnamic acids and derivatives	Hydroxycinnamic acids
Organoheterocyclic compounds	Adenosine	(M+H)+	268.104	168.982	143421	83682.4	167334	390790	436771	518633	2.8117	0.00211763	0.293002	C00212	Purine nucleosides	0	Purine nucleosides
Organic oxygen compounds	Raffinose	(M+NH4)+	522.202	446.913	11222.8	20266.4	17699.8	94753.9	67119.3	96649.1	1.18197	0.00214873	0.19027	C00492	Organooxygen compounds	Carbohydrates and carbohydrate conjugates	Oligosaccharides
Organic acids and derivatives	4-Aminobutyric acid	(M+H)+	104.07	372.29	88637.1	72268.4	91339.2	181103	154759	196683	1.17671	0.00235654	0.473658	C00334	Carboxylic acids and derivatives	"Amino acids, peptides, and analogues"	Gamma amino acids and derivatives
Organic oxygen compounds	Pantothenate	(M+H)+	220.117	273.744	300346	440844	443126	3.15718e+06	2.32979e+06	2.1427e+06	3.56137	0.00242308	0.155225	C00864	Organooxygen compounds	Alcohols and polyols	Secondary alcohols
Organic oxygen compounds	Galactinol	(M+NH4)+	360.15	434.036	2.39715e+06	3.04767e+06	2.8501e+06	9.44435e+06	7.13681e+06	7.25528e+06	1.63854	0.0025985	0.347993	C01235	Organooxygen compounds	Carbohydrates and carbohydrate conjugates	O-glycosyl compounds
Organic acids and derivatives	4-Guanidinobutyric acid	(M+H)+	146.092	357.551	141651	164442	282589	520206	646915	656712	3.15504	0.00266437	0.322771	C01035	Carboxylic acids and derivatives	"Amino acids, peptides, and analogues"	Gamma amino acids and derivatives
Lipids and lipid-like molecules	3-Hydroxyisovaleric acid	(M-H2O-H)-	99.0444	462.844	1078.54	1057.39	1636.61	3509.97	4723.46	3768.91	0.0940705	0.0027118	0.314317	0	Fatty Acyls	Fatty acids and conjugates	Hydroxy fatty acids
Organic acids and derivatives	3-Aminopropanesulphonic Acid	(M+CH3COO)-	198.04	371.208	1100.33	1726.23	587.454	10310.7	6837.66	10484.7	0.230811	0.00280906	0.123548	0	Organic acidis and derivatives	0	0
Organic oxygen compounds	.alpha.-D-(+)-Talose	(M+H-H2O)+	163.059	223.137	13391.3	31973.5	18282.9	155269	118352	104155	1.71569	0.00296226	0.16848	0	carbohydrates and carbohydrate derivatives	carbohydrate	0
Organoheterocyclic compounds	Adenine	(M-H)-	134.047	159.457	39020.6	45629.6	51622	140776	199892	152169	0.568803	0.00299956	0.276506	C00147	Purine nucleotides	0	0
organic hydroxy compound	1-Naphthol	(2M+H)+	289.125	154.302	48178	55719.4	66724.6	1.21715e+06	997008	708960	5.13732	0.0033782	0.0583698	C11714	Naphthalenes	Naphthols and derivatives	Naphthols and derivatives
organic amino compound	Pro-Asn	(M-2H+3Na)+	271.06	186.308	3353.01	5988.9	5047.25	10779.7	9699.58	11621.7	0.447583	0.00342366	0.448247	0	0	0	0
organic hydroxy compound	(+)-Catechin	(M+H)+	291.087	91.165	5.97311e+06	9.29095e+06	8.66712e+06	526095	719547	1.97993e+06	15.5271	0.00346698	7.41922	0	hydroxyflavan	catechin	0
Organic acids and derivatives	Phenylacetic acid	(M+H-H2O)+	119.048	223.888	3371.75	4172.4	4127.66	17034.4	13461.3	11496.2	0.453051	0.00353314	0.277954	0	0	0	0
Lipids and lipid-like molecules	Acetylcarnitine	(M+CH3COO+2H)+	264.143	97.501	8295.7	7914.46	8429.45	137250	95789.4	84413.2	1.45028	0.00370087	0.0776168	C02571	Fatty Acyls	Fatty acid esters	Acyl carnitines
Organic oxygen compounds	D-Tagatose	(M-H2O-H)-	161.045	192.242	15101.7	25903.7	18632.9	128181	166544	103605	0.715443	0.00371247	0.149721	C00795	Organooxygen compounds	Carbohydrates and carbohydrate conjugates	Monosaccharides
Organic acids and derivatives	2-Oxoadipic acid	(M-H2O-H)-	141.016	309.584	96353.9	84444.1	84405.6	131294	120695	140965	0.292586	0.00384078	0.674896	C00322	Keto acids and derivatives	Medium-chain keto acids and derivatives	Medium-chain keto acids and derivatives
organic amino compound	L-Citrulline	(M+H)+	271.102	418.177	8782.65	5381.12	25019.7	48742.7	48247.5	51335.9	0.171366	0.00405183	0.264171	0	0	0	0
Organoheterocyclic compounds	D-Arabinono-1,4-lactone	(M+CH3COO)-	207.051	320.159	52526.6	91084.6	57773.8	208477	167965	157702	0.875426	0.00484809	0.377023	0	Lactones	0	0
organic hydroxy compound	Estradiol Benzoate	(M+Na)+	399.185	209.478	2668.58	3145.85	3491.26	6437.26	7463.85	9129.34	0.188222	0.00505671	0.40406	0	0	0	0
organic hydroxy compound	Lavandulol	(M+H-H2O)+	137.131	136.655	58622.3	65216.2	55992.7	90915.9	79202.2	91976.2	0.534865	0.00510563	0.686132	0	0	0	0
Organic oxygen compounds	Maltopentaose	(M+NH4)+	846.307	524.237	397.193	429.779	485.253	274.216	305.056	258.302	0.0881771	0.00558131	1.5667	0	Organooxygen compounds	Carbohydrates and carbohydrate conjugates	Oligosaccharides
Organic acids and derivatives	alpha-N-Acetyl-L-glutamine	(M-H)-	187.072	402.863	471.928	1650.04	769.937	17547.2	10801.2	10803.4	0.297006	0.00604367	0.073864	0	Carboxylic acids and derivatives	0	0
Lipids and lipid-like molecules	3-Hydorxy-3-methylglutaric acid	(M-H)-	161.045	373.928	87939.6	121948	131334	267766	221932	207741	0.976367	0.00608505	0.489249	C03761	Fatty Acyls	Fatty acids and conjugates	Hydroxy fatty acids
organic amino compound	Ile-Thr	(M+H-2H2O)+	154.048	338.372	1391.67	3714.33	3147.57	9357.56	7441.42	6991.31	0.0546017	0.00679063	0.346931	C00624	Carboxylic acids and derivatives	"Amino acids, peptides, and analogues"	Glutamic acid and derivatives
Organoheterocyclic compounds	Uridine 5'-monophosphate (UMP)	(M-H)-	323.028	441.884	5754.12	8565.28	7250.4	26004.7	20396.4	17058.9	0.288781	0.00694227	0.339896	C00105	Pyrimidine nucleotides	Pyrimidine ribonucleotides	Pyrimidine ribonucleoside monophosphates
Phenylpropanoids and polyketides	Luteolin	(M+CH3CN+Na)+	350.063	188.392	5240.08	8269.17	6585.37	1230.61	2048.34	2510.21	0.427607	0.00746461	3.47108	C01514	Flavonoids	Flavones	Flavones
Phenylpropanoids and polyketides	Isoquercitin	(2M-H)-	927.186	198.437	2469.06	3286.58	3548.98	4980.32	4637.48	4703.16	0.187839	0.00808475	0.649721	C05623	Flavonoids	Flavonoid glycosides	Flavonoid-3-O-glycosides
Organoheterocyclic compounds	2-Hydroxyadenine	(M+H)+	152.056	230.361	5958.1	1275.54	5498	76681.2	143551	90674.7	1.78778	0.00823094	0.04095	0	Imidazopyrimidines	Purines and purine derivatives	6-aminopurines
organic hydroxy compound	Ginkgolic Acid	(M-H)-	345.242	26.791	335616	333834	324046	221081	137738	95186.7	0.580743	0.00839431	2.18829	0	Phenols	0	0
organic hydroxy compound	Coniferyl alcohol	(M+H)+	181.085	45.031	51821.1	50592.5	65711.6	95080.4	84325	80945.7	0.185335	0.00888724	0.645763	C00590	Phenols	Methoxyphenols	Methoxyphenols
Organoheterocyclic compounds	Adenosine 5'-triphosphate (ATP)	(M+H)+	508.002	489.708	6375.44	3785.23	5902.78	1690.34	1590.53	1397.47	0.374738	0.00905253	3.43357	C00002	Purine nucleotides	Purine ribonucleotides	Purine ribonucleoside triphosphates
Lipids and lipid-like molecules	Acetyl coenzyme A (Acetyl-CoA)	(M+H)+	810.131	426.92	718.047	835.616	1049.81	301.103	412.077	423.128	0.148586	0.00949245	2.29117	C00024	Fatty Acyls	Fatty acyl thioesters	Acyl CoAs
Organoheterocyclic compounds	Nicotinate	(M+H)+	124.039	339.409	509624	962854	614198	2.10663e+06	2.20139e+06	1.47033e+06	4.88536	0.0100052	0.36112	C00253	Pyridines and derivatives	Pyridinecarboxylic acids and derivatives	Pyridinecarboxylic acids
Organic oxygen compounds	alpha,alpha-Trehalose	(M-H2O-H)-	323.097	154.398	8825.64	13376.8	5484.34	50032.2	50563	28914.9	0.463167	0.0105512	0.213781	0	Monosaccharides	0	0
Organic oxygen compounds	D-Fructose	(M+CH3COO)-	239.076	153.413	32295.4	30490.7	28857.6	14275.8	8939.95	20637.1	0.169789	0.0106515	2.0898	C00095/C05003/C10906	Carbohydrates and carbohydrate conjugates	Monosaccharides	Monosaccharides
Phenylpropanoids and polyketides	Hyperoside	(M+H)+	465.102	203.987	24353.8	62683.5	41074.3	301375	258004	156138	1.60469	0.0116476	0.179048	C10073	Flavonoids	Flavonoid glycosides	Flavonoid-3-O-glycosides
Organic acids and derivatives	D-galacturonic acid	(M+CH3COO)-	253.055	254.737	6493.62	2126.67	1564.85	11983.8	9523.55	12420.4	0.130809	0.0117185	0.300201	C00333	Organic acidis and derivatives	0	0
Organic nitrogen compounds	Phenacetine	(M+CH3COO+2H)+	240.122	358.345	14640.4	18039.8	17295.8	12126.5	11720.9	9765.3	0.550597	0.0124693	1.48682	0	0	0	0
organic amino compound	Arg-Cys	(M+H)+	116.07	359.805	1941.58	1964.51	2063.57	2292.01	2149.12	2251.72	0.196318	0.0131106	0.891945	C00148	Carboxylic acids and derivatives	"Amino acids, peptides, and analogues"	Proline and derivatives
Phenylpropanoids and polyketides	DL-3-Phenyllactic acid	(M-H)-	165.055	67.68	54560.1	61392	63218.3	192922	122203	138292	0.980703	0.0132695	0.395156	C01479	Phenylpropanoic acids/Tropane alkaloids	0	Phenylpropanoic acids/Tropane alkaloids
Organic acids and derivatives	DL-3-Hydroxybutyric acid	(M+H-H2O)+	87.0433	372.59	65048.5	46815.1	67708.2	93272.9	93351.3	114237	0.560907	0.0134721	0.596859	C01089	Hydroxy acids and derivatives	Beta hydroxy acids and derivatives	Beta hydroxy acids and derivatives
Organic acids and derivatives	DL-lactate	(M-H)-	89.0242	404.69	364058	260588	253738	154003	114936	139516	0.572724	0.0139053	2.1505	C00256/C00186	Hydroxy acids and derivatives	Alpha hydroxy acids and derivatives	Alpha hydroxy acids and derivatives
Organoheterocyclic compounds	Carbamazepine	(M-2H+3Na)+	303.049	141.76	12365	37460.5	17286.1	58301.2	64450.8	85856.9	0.940345	0.0141708	0.32171	0	0	0	0
Organic oxygen compounds	Dihydroxyacetone	(M-H2O-H)-	71.0136	404.69	191399	226256	213929	135233	93879.8	153232	0.415522	0.0149895	1.65187	C00184	Organooxygen compounds	Carbohydrates and carbohydrate conjugates	Monosaccharides
Organic acids and derivatives	1,2-Benzenedicarboxylic acid	(M-H)-	165.022	245.918	15768.9	21055.7	14107.8	51000	35949.6	34201	0.407805	0.0150289	0.420405	0	Carboxylic acids and derivatives	0	0
Organic oxygen compounds	Arbutin	(M-H)-	271.081	151.447	28739.2	49734.2	34347.2	124476	87586.8	81226.1	0.715638	0.0155386	0.384674	C06186	Organooxygen compounds	Carbohydrates and carbohydrate conjugates	Phenolic glycosides
organic amino compound	N-Acetyl-L-tyrosine	(M-H+2Na)+	268.061	231.994	1372.11	2716.74	1885.43	3858.38	3376.89	3894.8	0.17772	0.0156574	0.536769	C01657	Carboxylic acids and derivatives	"Amino acids, peptides, and analogues"	Tyrosine and derivatives
Organic oxygen compounds	D-Mannitol	(M+H)+	183.085	388.735	5671.55	10745	6928.26	15258.4	13818.6	13694.3	0.322735	0.0157041	0.545805	C00392	Organooxygen compounds	Carbohydrates and carbohydrate conjugates	Sugar alcohols
Organic oxygen compounds	D-Mannose	(M+NH4)+	198.096	299.051	115822	86080	90973.4	59399.8	51358.9	63573.6	1.16636	0.0161406	1.67998	C00159	Organooxygen compounds	Carbohydrates and carbohydrate conjugates	Hexoses
Organic acids and derivatives	2-Dehydro-3-deoxy-D-gluconate	(M+CH3COO)-	237.061	387.201	78402.4	77024.1	91910.3	210259	145647	149031	0.772731	0.0162802	0.489837	C00204	Carboxylic acids and derivatives	0	0
organic amino compound	N-Acetyl-L-glutamate	(M+H)+	233.149	236.846	13792.9	16877.5	14268.7	72553	42676.8	44361.8	0.217826	0.0171781	0.281589	0	0	0	0
Phenylpropanoids and polyketides	m-Coumaric acid	(M+H-H2O)+	147.043	251.006	14175.8	14895.9	12277.7	17456.4	16934.3	16573.6	0.0817561	0.0175476	0.811343	C12621	Cinnamic acids and derivatives	Hydroxycinnamic acids and derivatives	Hydroxycinnamic acids
Organic oxygen compounds	Pyruvaldehyde	(2M-H)-	143.034	39.205	133920	108595	143188	266891	212053	192881	1.06446	0.0175722	0.574113	C00546	Organooxygen compounds	Carbonyl compounds	Alpha ketoaldehydes
organic amino compound	Lys-Cys	(M-H+2Na)+	283.063	171.592	2589.49	4954.56	3417.55	7392.96	7605.8	5922.55	0.276229	0.0189749	0.523944	0	0	0	0
Organic oxygen compounds	Naringenin-7-O-Glucoside	(M-H)-	433.111	132.495	96782.9	73521.5	96737.2	362929	296297	187625	1.42954	0.0201164	0.315335	0	Organooxygen compounds	0	0
Organic acids and derivatives	DL-Indole-3-lactic acid	M+	205.07	346.045	16028.5	25379.7	11214.2	44040.3	38550.9	31483.4	0.663946	0.020673	0.461297	0	0	0	0
Organic acids and derivatives	trans-cinnamate	(M+H)+	149.058	352.909	2592	3038.77	2505.51	1991.71	2189.52	1842.82	0.104735	0.0219377	1.35063	C00423	0	0	0
organic hydroxy compound	Gallic acid	(M+H)+	171.028	301.128	12249.3	32940.3	22516.9	767.506	976.183	969.842	0.847258	0.0222233	24.9514	C01424	Benzene and substituted derivatives	Benzoic acids and derivatives	Gallic acids
Phenylpropanoids and polyketides	Naringenin	(M+H)+	273.075	118.069	19990.6	24125.1	18520.6	55026.4	39852.5	72977.4	0.910404	0.0225849	0.373154	C00509	Flavonoids	Flavans	Flavanones
Lipids and lipid-like molecules	Itaconic acid	(2M+H)+	261.057	252.919	1480.57	1839.22	2055.95	6424.93	3554.17	4542.32	0.0912708	0.0237827	0.370193	C00490	Fatty Acyls	Fatty acids and conjugates	Branched fatty acids
organic hydroxy compound	3-Methoxy-4-hydroxyphenylethyleneglycol	(M+NH4)+	202.107	371.075	35540.1	35810	31548.7	77031.6	61991.6	49433.2	0.715529	0.0243899	0.546009	C05594	Phenols	Methoxyphenols	Methoxyphenols
Organoheterocyclic compounds	Nicotinamide adenine dinucleotide phosphate (NADP)	(M-H)-	742.066	499.416	1338.12	1000.58	1548.33	620.243	682.064	809.452	0.039178	0.0248549	1.84066	C00006	(5'->5')-dinucleotides	0	(5'->5')-dinucleotides
Lipids and lipid-like molecules	.beta.-Estradiol 3-sulfate	(2M-H)-	703.266	263.961	964.617	1600.76	1051.8	68162.3	27635.7	36511.4	0.634892	0.0251845	0.0273388	0	Steroids and steroid derivatives	0	0
organic amino compound	L-Saccharopine	(M+CH3CN+Na)+	307.168	263.767	1289.06	3786.16	2501.92	5374.82	4751.39	5216.48	0.623774	0.0254599	0.49386	0	0	0	0
organic amino compound	D-Proline	(M+H)+	156.076	439.697	4475.23	13564.4	8823.86	21215.2	19147.1	30372.4	0.250673	0.027939	0.379778	C00135	Carboxylic acids and derivatives	"Amino acids, peptides, and analogues"	Histidine and derivatives
Organic acids and derivatives	trans-3-Coumaric acid	(M+H-H2O)+	147.043	343.219	20524.2	22878.2	31792	81144.9	182186	113884	1.79272	0.0283019	0.199341	0	0	0	0
organic amino compound	L-Glutamate	(M+H)+	245.185	185.616	95069.5	124936	123798	502025	338716	250408	0.253491	0.0285516	0.315084	0	0	0	0
Organic acids and derivatives	L-Ascorbic acid	(M+H)+	177.038	448.024	1290.73	1445.07	1256.63	2620.9	1720.97	2490.63	0.148537	0.0298817	0.584328	C00072	0	0	0
Organic oxygen compounds	D-Galactarate	(M-H)-	209.03	441.774	172880	135675	291108	46803.5	54307.2	31652.6	0.735194	0.0302627	4.51679	C00879	Organooxygen compounds	Carbohydrates and carbohydrate conjugates	Glucuronic acid derivatives
Lipids and lipid-like molecules	cis-9-Palmitoleic acid	(M-H)-	253.217	20.822	24917.2	30715.4	29466.9	36009.7	33248.9	38284.9	0.295847	0.0306979	0.791303	C08362	Fatty Acyls	Fatty acids and conjugates	Long-chain fatty acids
organic amino compound	Asp-Pro	(M+H)+	175.117	252.848	31556.1	11967.1	53930.2	110959	144560	241615	0.105199	0.0314037	0.19603	C00062	Carboxylic acids and derivatives	"Amino acids, peptides, and analogues"	L-alpha-amino acids
Organoheterocyclic compounds	Uridine 5'-diphosphate (UDP)	(M+H)+	405.009	447.15	19260.7	21914.2	19895.5	18234.5	15924	15161.2	0.589717	0.0327448	1.23826	C00015	Pyrimidine nucleotides	Pyrimidine ribonucleotides	Pyrimidine ribonucleoside diphosphates
Lipids and lipid-like molecules	Estrone 3-sulfate	(M-H)-	349.112	178.446	30707.9	39114.7	36068.9	28367.1	17937.9	15624.9	0.148042	0.0339288	1.70986	C02538	Steroids and steroid derivatives	Sulfated steroids	Sulfated steroids
Phenylpropanoids and polyketides	4-Hydroxycinnamic acid (Sinapic acid)	(M+H-H2O)+	147.043	430.684	69803.5	21099	38676.2	234244	749169	683276	0.095289	0.0343536	0.0777462	C00811	Cinnamic acids and derivatives	Hydroxycinnamic acids and derivatives	Hydroxycinnamic acids
Organoheterocyclic compounds	Dehydroascorbic acid (Oxidized vitamin C)	(M-H)-	173.009	118.289	4.41211e+07	4.87505e+07	6.79518e+07	3.37418e+07	2.10063e+07	3.11092e+07	8.90413	0.0390136	1.87315	C05422	Organoheterocyclic compounds	0	0
Organic oxygen compounds	L-Rhamnose	(M+CH3COO)-	223.081	249.792	61141.8	138312	92470.4	209012	243059	149070	0.805274	0.0437969	0.485617	C00507	Organooxygen compounds	Carbohydrates and carbohydrate conjugates	Hexoses
Organic oxygen compounds	Fructose 1-phosphate	(M-H)-	259.022	163.706	5818.34	60722.3	54151.2	100526	122154	80582.8	0.539299	0.0446088	0.397979	C01094	Organooxygen compounds	Carbohydrates and carbohydrate conjugates	Hexose phosphates
Organic oxygen compounds	D-Glucose 6-phosphate	(M+H)+	261.037	436.955	3540.54	2116.74	2950.96	1840.68	1485.49	1602.14	0.255544	0.0450548	1.74669	C00092	Organooxygen compounds	Carbohydrates and carbohydrate conjugates	Hexose phosphates
Organoheterocyclic compounds	Creatinine	M-	113.06	66.335	539129	1.141e+06	993503	1.98109e+06	1.35267e+06	1.55508e+06	2.6955	0.0463718	0.546886	C00791	Carboxylic acids and derivatives	"Amino acids, peptides, and analogues"	Alpha amino acids and derivatives
organic hydroxy compound	Pyridoxine	(M+H)+	170.08	105.657	133430	232701	209420	106857	119775	80506.9	1.59206	0.0495542	1.87391	C00314	0	0	0
Organic oxygen compounds	Sucrose	(M+NH4)+	360.149	342.649	33167.6	42683.6	72667	107666	86865.3	159170	0.751538	0.0496118	0.419897	C00089	Organooxygen compounds	Carbohydrates and carbohydrate conjugates	O-glycosyl compounds
Organic oxygen compounds	Maltitol	(M-H)-	343.123	404.929	79273.4	73166.8	55153	258010	128860	155190	0.94791	0.0496688	0.382971	0	Organooxygen compounds	0	0
organic hydroxy compound	3,4-Dihydroxybenzoate (Protocatechuic acid)	(M-H)-	153.019	300.303	28030.1	27415.5	32658.1	18883.8	16844	25847.9	0.055163	0.0501655	1.43082	0	Phenols	Benzenediols	0
Organic acids and derivatives	4-acetamidobutanoate	(M+H)+	146.08	338.915	12458.6	3013.76	13280.2	19732.6	18261	18111.6	0.230783	0.0521957	0.512478	0	0	0	0
Organic oxygen compounds	Chlorogenic acid	(M-H)-	353.086	250.383	624508	293124	291935	126157	96080.2	112075	1.08089	0.0582852	3.61808	C00852	Organooxygen compounds	Alcohols and polyols	Quinic acids and derivatives
Organoheterocyclic compounds	UDP-N-acetylglucosamine	(M+H)+	608.087	434.44	15694.5	10920.2	15976.4	11421.3	6159.64	5931.21	0.36063	0.0589994	1.81145	C00043	Pyrimidine nucleotides	Pyrimidine nucleotide sugars	Pyrimidine nucleotide sugars
Organic oxygen compounds	L-Threonate	(M-H)-	135.029	330.603	222639	533375	267794	941382	525591	1.1119e+06	2.05692	0.0599788	0.396998	C01620	Organooxygen compounds	Carbohydrates and carbohydrate conjugates	Sugar acids and derivatives
organic hydroxy compound	Procyanidin A2	(M-H)-	575.119	243.958	153042	90641	263482	56712	19298.3	30650	0.819053	0.0612885	4.75496	0	Phenols	0	0
organic hydroxy compound	Resorcinol	(M+CH3COO+2H)+	171.064	200.511	4670.09	5542.18	4179.28	12705.2	6612.11	9096.6	0.254348	0.0614691	0.506497	0	0	0	0
Organic nitrogen compounds	Pantetheine	(M-H)-	277.122	218.652	8858.57	8144.32	14055.5	4832.25	4949.4	6430.83	0.179058	0.0625917	1.91571	C00831	Carboxylic acids and derivatives	"Amino acids, peptides, and analogues"	Beta amino acids and derivatives
Organic oxygen compounds	L-Sorbose	(M-H2O-H)-	161.045	152.33	60658.2	100081	81544.4	211830	144060	117902	0.764601	0.0630396	0.511372	C00247	Organooxygen compounds	Carbohydrates and carbohydrate conjugates	Monosaccharides
Phenylpropanoids and polyketides	Daidzin	(M+H)+	417.117	159.15	40179.2	15448.9	23472.4	1295.01	6041.8	11849.5	0.452256	0.0647504	4.12277	C10216	Isoflavonoids	Isoflavonoid O-glycosides	Isoflavonoid O-glycosides
organic amino compound	L-Alanine	(M+H)+	247.129	390.569	4277.3	9141.48	6997.77	18599.9	15434.8	9358.86	0.0398037	0.0662631	0.470497	0	0	0	0
Organic acids and derivatives	Maleic acid	(M+NH4-2H)-	132.03	403.892	50897.3	47216.9	56285.8	138293	89180.1	73136.8	0.578909	0.0693604	0.513622	C01384	Carboxylic acids and derivatives	Dicarboxylic acids and derivatives	Dicarboxylic acids and derivatives
Organoheterocyclic compounds	L-Gulonic gamma-lactone	(M+CH3COO)-	237.061	205.297	11497.5	17367.7	22210.8	29036.4	22213.9	34623.2	0.369605	0.0706721	0.594782	C01040	Lactones	Gamma butyrolactones	Gamma butyrolactones
Organic oxygen compounds	2-Acetylresorcinol	(M+CH3COO+2H)+	213.075	120.906	57343.7	77208.1	41415.1	24460	40721.7	26088.3	0.831566	0.0712419	1.92798	0	0	0	0
Phenylpropanoids and polyketides	3-Phenylpropanoic acid	(M+H-H2O)+	133.064	173.301	10800.5	45129.9	23907.4	53287.6	46921.4	53464.6	0.97558	0.0739018	0.519528	C05629	Phenylpropanoic acids	0	Phenylpropanoic acids
Organic acids and derivatives	gamma-L-Glutamyl-L-glutamic acid	(M+H)+	277.102	459.458	5739.94	4091.73	4122.98	3109.66	3033.2	3662.43	0.182537	0.075349	1.42318	C05282	Carboxylic acids and derivatives	"Amino acids, peptides, and analogues"	Glutamic acid and derivatives
Organic acids and derivatives	(R)-3-Hydroxybutyric acid	(M+H-H2O)+	87.043	341.952	1620.69	2850.46	1929.85	3364.8	3148.41	2789.24	0.0987768	0.075664	0.688099	C01089	Hydroxy acids and derivatives	Beta hydroxy acids and derivatives	Beta hydroxy acids and derivatives
Organoheterocyclic compounds	L-Tryptophan	(M+H)+	205.097	258.07	129761	217363	223550	535537	265410	370456	2.60342	0.0762555	0.487171	C00078	Indoles and derivatives	Indolyl carboxylic acids and derivatives	Indolyl carboxylic acids and derivatives
Organic nitrogen compounds	Triethanolamine	(M+H)+	150.111	151.418	18484.8	20523.5	37565	42703.5	58213.4	37249.2	0.246012	0.0781137	0.554212	C06771	Organonitrogen compounds	Amines	"1,2-aminoalcohols"
Organic acids and derivatives	L-Pipecolic acid	(M-H)-	128.071	307.604	47313	226953	111307	7979.25	5301.35	4585.07	0.60168	0.0801456	21.5818	C00408	Carboxylic acids and derivatives	"Amino acids, peptides, and analogues"	Alpha amino acids/L-alpha-amino acids
Organic acids and derivatives	3-Dehydroshikimic acid	(M-H)-	171.03	299.269	561538	288285	351071	169245	232379	207850	0.611878	0.0803515	1.97038	0	Hydroxy acids and derivatives	0	0
organic hydroxy compound	gamma-Tocotrienol	M+	410.317	587.673	4421.61	5015.09	4336.91	3955.69	4225.52	3999.64	0.219773	0.0814023	1.13076	0	chromanol	tocol	0
organic amino compound	Phe-Tyr	(M+H-H2O)+	232.117	295.972	59578.4	315519	197347	23978.8	11424.9	25944.2	0.282523	0.083006	9.33111	0	0	0	0
Organoheterocyclic compounds	UDP-D-Galactose	(M+NH4)+	584.088	447.15	19379.7	18249.6	18324.6	17817.1	15269.3	12929.7	0.551875	0.0854915	1.21596	C00052	Pyrimidine nucleotides	Pyrimidine nucleotide sugars	Pyrimidine nucleotide sugars
organic hydroxy compound	Ferulaldehyde	(M+H)+	179.069	172.395	23623	27590.2	29204.5	67319.3	36223.8	42025.6	0.113468	0.0884887	0.552438	0	phenols	guaiacols	0
Organic oxygen compounds	Phloridzin	(M-H)-	435.128	139.888	1.28672e+06	5.51268e+06	2.57676e+06	250957	376440	400853	2.70327	0.0902223	9.11856	0	Organooxygen compounds	Carbonyl compounds	0
Phenylpropanoids and polyketides	Astragalin	(M+H)+	449.109	255.172	17583.2	7399.59	23474.8	4915.91	6716.55	5330.77	0.414183	0.0905127	2.85662	C12249	Flavonoids	Flavonoid glycosides	Flavonoid-3-O-glycosides
Organic oxygen compounds	Perillyl alcohol	(M+H)+	153.126	132.238	109131	72454.5	73490.6	120821	114110	180671	1.06649	0.0929266	0.613752	0	terpenoid	monoterpenoid	0
Organic acids and derivatives	Salicylic acid	(M-H)-	137.024	89.962	129644	240251	247733	121716	63621.4	139308	0.321764	0.09322	1.90247	C00805	Benzene and substituted derivatives	Benzoic acids and derivatives	Salicylic acids
organic amino compound	L-Glutamine	(M+H)+	104.07	292.738	14655.4	42681	33357.5	8326.86	16397.6	9390.63	0.478839	0.0939139	2.65847	C01026	Carboxylic acids and derivatives	"Amino acids, peptides, and analogues"	Alpha amino acids
Organic acids and derivatives	Glutaric acid	(M-H)-	131.034	366.124	20198.6	30823.9	26921.9	57209.5	31030.1	42094	0.443832	0.100173	0.598037	C00489	Carboxylic acids and derivatives	Dicarboxylic acids and derivatives	Dicarboxylic acids and derivatives
Organic acids and derivatives	Glutaconic acid	(M+CH3COO+2H)+	191.054	255.087	1450.77	2130.81	3264.83	4077.38	3055.27	3562.56	0.122442	0.101607	0.640138	C02214	Carboxylic acids and derivatives	Dicarboxylic acids and derivatives	Dicarboxylic acids and derivatives
organic amino compound	Tyr-Gly	(M+H)+	231.097	396.133	8158.77	14264.9	12308.9	17164.8	19853.4	13727.2	1.70747	0.102198	0.684448	0	0	0	0
Organic nitrogen compounds	2-Methylbutyroylcarnitine	(M-2H+3K)+	361.042	380.804	454.371	385.937	474.285	482.571	659.161	829.853	0.0764852	0.102432	0.66677	0	0	0	0
Organoheterocyclic compounds	Urocanic acid	(M+H-H2O)+	121.039	182.016	11890	13943.8	20044.6	72654.5	51646.3	19423.6	0.374255	0.105892	0.319211	C00785	Azoles	Imidazoles	Imidazolyl carboxylic acids and derivatives
Organoheterocyclic compounds	Nicotinamide adenine dinucleotide (NAD)	(M-H)-	662.102	444.614	1634.07	2738.72	2500.35	1689.02	928.421	1654.19	0.0562909	0.106236	1.60902	C00003	(5'->5')-dinucleotides	0	(5'->5')-dinucleotides
Organic acids and derivatives	3R-hydroxy-butanoic acid	(M+Na-2H)-	125.024	258.121	77611.4	36181.3	31590.8	14880.9	22308	16827.2	0.188995	0.108775	2.69148	0	Hydroxy acids and derivatives	0	0
Lipids and lipid-like molecules	Estradiol Cypionate	(M-H)-	395.26	26.505	135505	116151	192293	394204	295118	172971	0.976472	0.109368	0.514847	0	Steroids and steroid derivatives	0	0
Lipids and lipid-like molecules	PC(16:0/16:0)	(M+Na)+	756.554	147.938	2.88696e+06	2.87469e+06	3.01463e+06	3.07716e+06	4.82907e+06	3.97439e+06	0.729204	0.111204	0.738705	C00157	Glycerophospholipids	Glycerophosphocholines	"Phosphatidylcholines//1-acyl,2-(1Z-alkenyl)-glycerophosphocholines"
Lipids and lipid-like molecules	Glycerophosphocholine	M+	258.11	388.526	912577	852524	1.01292e+06	887654	582943	413548	3.78054	0.111522	1.47442	C00670	Glycerophospholipids	Glycerophosphocholines	Glycerophosphocholines
Lipids and lipid-like molecules	Cholic acid	(M+H-2H2O)+	373.272	27.987	7196.24	15227.1	12257.7	6927.1	7180.19	6308.23	0.559753	0.114009	1.69876	C00695	Steroids and steroid derivatives	"Bile acids, alcohols and derivatives"	"Trihydroxy bile acids, alcohols and derivatives"
Organoheterocyclic compounds	L-Tyrosine	(M+H)+	182.08	299.448	11119.2	11232.8	15379.1	19075.4	15462.8	14784.4	0.127789	0.116304	0.764987	C00082	0	0	0
Organic oxygen compounds	Ethyl glucuronide	(M-H)-	221.066	373.19	58603.6	69864.3	64741.5	86072.3	78577.5	66960.4	0.298353	0.117875	0.834201	0	Organooxygen compounds	Carbohydrates and carbohydrate conjugates	O-glucuronides
Organoheterocyclic compounds	Allantoin	M-	158.045	182.785	42237.2	74608.8	51756.8	110091	66719.3	85660.3	0.593915	0.118875	0.642369	C01551	Azoles	Imidazoles	Imidazoles
Organic acids and derivatives	2-Keto-D-gluconic acid	(M-H2O-H)-	175.024	225.245	13920.8	25591.3	15069	57719.5	29213.2	28235.4	0.395969	0.122985	0.473925	C06473	Carboxylic acids and derivatives	0	0
Phenylpropanoids and polyketides	Phe-Pro	(M+H)+	263.138	258.155	173.566	702.488	1364.99	7633.76	6682.1	631.805	0.282191	0.129003	0.149926	0	0	0	0
organic amino compound	Val-Phe	(M+H)+	231.169	279.714	28315.1	34322.6	2256.23	3456.63	2556.55	2576.71	0.297799	0.129318	7.55468	0	0	0	0
Lipids and lipid-like molecules	2-Methyl-3-hydroxybutyric acid	M+	118.06	351.729	1835.3	22.6749	1587.16	107.515	80.6375	43.4679	0.156602	0.132226	14.8741	0	Fatty Acyls	Fatty acids and conjugates	Hydroxy fatty acids
Organoheterocyclic compounds	3-Methylindole	(M+H)+	132.08	178.957	2656.24	4035.84	2496.93	3411.32	4494.27	5488.89	0.0833379	0.144241	0.686029	C08313	Indoles and derivatives	Indoles	3-methylindoles
Organic oxygen compounds	Cellobiose	(M-H2O-H)-	323.097	223.404	8922.84	10380.5	10043.5	11509.6	12652.3	20272.9	0.249463	0.145306	0.660446	C00185	Organooxygen compounds	Carbohydrates and carbohydrate conjugates	O-glycosyl compounds
Organic oxygen compounds	L-Arabinose	(M-H)-	149.045	134.138	54323.4	75710.8	66051.7	60524.9	49426.2	44050.5	0.174956	0.148819	1.27327	C00259/C11476	Organooxygen compounds	Carbohydrates and carbohydrate conjugates	Pentoses
Organoheterocyclic compounds	5-Hydroxymethylcytidine	M+	273.094	412.847	7997.99	5662.61	8340.4	5765.89	6276.52	5400.71	0.265561	0.15892	1.2613	0	0	0	0
Organic acids and derivatives	D-Pipecolinic acid	(M+H)+	130.085	369.05	2863.53	5695.95	1970.23	1461.08	1351.35	1895.7	0.157793	0.16257	2.2365	0	0	0	0
organic amino compound	DL-O-tyrosine	(M+H)+	148.059	297.857	99266.9	212652	162492	249118	175189	301448	0.0427031	0.163593	0.65368	C00025	Carboxylic acids and derivatives	"Amino acids, peptides, and analogues"	Glutamic acid and derivatives
organic amino compound	L-Aspartate	(M+H)+	134.044	404.109	96772	102371	105840	98003.4	95404.7	79464.8	0.983981	0.168142	1.11767	C00049	Carboxylic acids and derivatives	"Amino acids, peptides, and analogues"	Aspartic acid and derivatives
Organic acids and derivatives	Methylmalonic acid	(M-H)-	117.019	466.084	30848.3	25647.1	31879.1	33788.3	48688.9	32726	0.212953	0.179413	0.767118	C02170	Carboxylic acids and derivatives	Dicarboxylic acids and derivatives	Dicarboxylic acids and derivatives
Organic acids and derivatives	p-Salicylic acid	(M+H)+	139.038	431.236	2130.49	3214.69	1878.67	1835.03	1383.87	1869.09	0.193375	0.179924	1.41978	0	0	0	0
Lipids and lipid-like molecules	Oleic acid	(M-H)-	281.248	5.409	76072	223023	76724.2	219784	179716	222036	0.885478	0.181995	0.604662	C00712	Fatty Acyls	Fatty acids and conjugates	Long-chain fatty acids
Phenylpropanoids and polyketides	Rhapontigenin	(M+CH3CN+H)+	300.118	432.553	12487.6	32136	16816.3	11178.3	11026.2	10434.9	0.547445	0.182798	1.88238	0	Stilbenes	0	Stilbenes
Phenylpropanoids and polyketides	(+-)-Taxifolin	(M-H)-	303.051	89.185	369317	577191	438334	147754	416323	339779	0.632161	0.186175	1.53215	0	Flavonoids	0	0
Organoheterocyclic compounds	Indole-3-pyruvic acid	(M+NH4)+	221.091	281.345	4083.13	7777.32	2294.14	7562.72	6635.2	7678.01	0.242697	0.193327	0.64704	C00331	Indoles and derivatives	Indolyl carboxylic acids and derivatives	Indolyl carboxylic acids and derivatives
Lipids and lipid-like molecules	Thioetheramide-PC	(M-H+2Na)+	780.554	120.608	2.55675e+06	3.59238e+06	3.03894e+06	4.50281e+06	3.0364e+06	4.08446e+06	0.924261	0.199574	0.790463	0	0	0	0
Organoheterocyclic compounds	Indole	(M+H)+	118.064	258.126	32051.6	72459.3	54371.4	78296.5	58162.1	96684.5	0.437588	0.199758	0.68148	C00463	Indoles and derivatives	Indoles	Indoles
organic hydroxy compound	6''-O-Acetyldaidzin	(M+H)+	459.126	129.511	12010.3	14972.9	12626.2	15455.5	15957.5	29764.1	0.47571	0.206569	0.647456	0	0	0	0
Phenylpropanoids and polyketides	Phloretin	(M+H)+	275.093	81.947	57540.5	164752	81199.5	46722.1	65965.8	40867.2	1.49893	0.208796	1.97643	C00774	"Linear 1,3-diarylpropanoids"	Chalcones and dihydrochalcones	2'-Hydroxy-dihydrochalcones
organic hydroxy compound	Chrysin	(M+CH3COO+2H)+	315.078	449.417	25562.4	58552.9	91632.2	29250.2	30250.3	30912.3	1.02095	0.210245	1.94383	0	hydroxyflavone	dihydroxyflavone	0
Phenylpropanoids and polyketides	Rutin	(M-H)-	609.144	275.28	15295.5	39160.8	27428.5	29169.6	54896.4	42996.6	0.357143	0.211516	0.644444	C05625	Flavonoids	Flavonoid glycosides	Flavonoid-3-O-glycosides
organic amino compound	Glutathione disulfide	(M+H)+	217.117	338	31771.5	39354.6	36907.8	32098.8	32452.3	33399.7	0.255294	0.212483	1.10294	0	0	0	0
Organic oxygen compounds	Embelin	(M-H)-	293.179	27.0795	5.38354e+06	5.573e+06	5.96455e+06	1.27629e+07	6.33545e+06	6.9293e+06	5.00424	0.214205	0.65012	0	Organooxygen compounds	0	0
Phenylpropanoids and polyketides	1-Stearoyl-2-hydroxy-sn-glycero-3-phosphocholine	(M+H)+	524.368	192.311	10507.2	37980.4	21065.3	11733.6	14761.6	7223.01	0.547861	0.223315	2.06276	0	cholines	phosphocholines	0
Organic oxygen compounds	N-Acetylmannosamine	(M-H2O-H)-	202.071	307.322	2958.83	3820.28	5359.25	6422.17	5457.49	4279.75	0.156045	0.225537	0.751164	C00645	Organooxygen compounds	Carbohydrates and carbohydrate conjugates	Acylaminosugars
Organic acids and derivatives	3-Methylphenylacetic acid	(M+H-H2O)+	133.064	195.358	8614.68	35324.2	16474.3	30840.6	42934.6	26482.9	0.460591	0.227616	0.602576	0	Benzene and substituted derivatives	Toluenes	Toluenes
Organic oxygen compounds	Shikimate	(M-H)-	173.043	456.992	119912	145219	126916	744.004	161361	449.89	0.374448	0.230375	2.41178	C00493	Organooxygen compounds	Alcohols and polyols	Shikimic acids and derivatves
Lipids and lipid-like molecules	3b-Hydroxy-5-cholenoic acid	(M-H)-	373.274	26.505	9.73115e+06	1.08115e+07	6.26959e+06	8.08427e+06	6.95711e+06	4.05256e+06	1.11653	0.230743	1.40422	0	Steroids and steroid derivatives	0	0
Organic acids and derivatives	N-Carboxyethyl-.gamma.-aminobutyric acid	(M+H)+	176.091	361.33	6761.12	18831	12304.5	61797.6	19648.2	18333.8	0.450231	0.233045	0.379803	0	0	0	0
Organic oxygen compounds	Stachyose	(M+NH4)+	684.254	515.913	475.634	1872.3	515.768	1670.86	1788.29	1373.67	0.131334	0.239431	0.592553	C01613	Organooxygen compounds	Carbohydrates and carbohydrate conjugates	Oligosaccharides
Lipids and lipid-like molecules	Cholesteryl sulfate	(M-H)-	465.303	27.128	393182	290456	345174	206913	364613	217824	0.698054	0.246645	1.30337	0	Steroids and steroid derivatives	Sulfated steroids	0
Organic oxygen compounds	N-Acetyl-D-lactosamine	M-	383.146	164.343	19945.5	13808.7	19114.1	28335.8	26464.2	15653.3	0.139016	0.253197	0.750403	0	Carbohydrates and carbohydrate conjugates	0	0
Organic oxygen compounds	alpha-D-Galactose 1-phosphate	(M-H)-	259.022	458.565	15000	13719.6	29475.1	16153.3	11842.5	7922.86	0.134489	0.254302	1.62018	C00446	Organooxygen compounds	Carbohydrates and carbohydrate conjugates	Monosaccharide phosphates
Organic acids and derivatives	m-Chlorohippuric acid	M-	213.016	99.757	63425.8	98556.7	83882.8	99792.1	97708	90140.6	0.409184	0.259257	0.854765	0	Carboxylic acids and derivatives	0	0
Organic oxygen compounds	N-Acetylglucosamine 1-phosphate	(M-H)-	300.048	446.765	7820.28	5291.85	5697.95	7018.46	3219.63	2029.76	0.079882	0.267977	1.53328	C04256	Organooxygen compounds	Carbohydrates and carbohydrate conjugates	N-acyl-alpha-hexosamines
Organic nitrogen compounds	Betaine aldehyde	(M+H)+	102.09	280.833	12805.9	12145.9	12794.6	13157.1	21010.3	13443.5	0.286792	0.271583	0.792809	C00576	Organonitrogen compounds	Quaternary ammonium salts	Tetraalkylammonium salts
Organic oxygen compounds	Salidroside	(M+K-2H)-	337.069	138.062	20499	21399.2	17222.3	822146	77932.6	89814.2	0.804662	0.275973	0.0597241	0	Carbohydrates and carbohydrate conjugates	0	0
Organoheterocyclic compounds	.beta.-Homoproline	(M+H)+	130.085	338.531	8459.3	17489.5	12782.5	12387.3	8209.49	6561.25	0.306495	0.28544	1.42614	0	0	0	0
Organic oxygen compounds	D-Sorbitol	(M-H)-	181.071	293.624	59556.9	239516	134509	264490	201560	181366	0.85769	0.285613	0.669712	C00794	Organooxygen compounds	Carbohydrates and carbohydrate conjugates	Sugar alcohols
Organoheterocyclic compounds	Indoleacrylic acid	(M+H-H2O)+	170.059	258.238	16972.6	42981.9	26579.7	41751.4	30298.3	47664.5	0.322835	0.293122	0.72284	0	Indoles and derivatives	Indoles	Indoles
Organic acids and derivatives	Homoveratric acid	(M-H)-	195.066	219.124	56491.8	43264.4	55390.6	86307	63094.3	48165.1	0.426615	0.299713	0.785289	0	Benzene and substituted derivatives	Methoxybenzenes	Dimethoxybenzenes
Organoheterocyclic compounds	Uridine diphosphate glucose(UDP-D-Glucose)	(M-H)-	565.048	447.293	43689.5	52541.1	52798.5	55683.7	33930.1	26946.2	0.203603	0.30268	1.27856	C00029	Pyrimidine nucleotides	Pyrimidine nucleotide sugars	Pyrimidine nucleotide sugars
Organic acids and derivatives	3-Hydroxycapric acid	(M+K-2H)-	225.085	249.762	2900.34	4681.54	1105.82	29755.8	5837.67	3115.52	0.157537	0.305608	0.224436	0	Hydroxy acids and derivatives	Medium-chain hydroxy acids and derivatives	Medium-chain hydroxy acids and derivatives
Organic acids and derivatives	Homogentisic acid	(M-H)-	167.034	67.4255	44308.3	56374.7	55449.3	66005.8	47483.6	70521.4	0.41986	0.312313	0.848495	C00544	Benzene and substituted derivatives	Phenylacetic acids	2(hydroxyphenyl)acetic acids
organic amino compound	Pro-Glu	(M+CH3COO+2H)+	176.091	336.699	3107.88	7077.15	5710.61	3771.29	4288.71	3820.06	0.575126	0.318522	1.33801	C00763	Carboxylic acids and derivatives	"Amino acids, peptides, and analogues"	Proline and derivatives
Organic oxygen compounds	Trehalose	(M+Na-2H)-	363.089	363.031	17693.9	19699.1	15745.6	24445.6	16753.7	20461	0.0911277	0.318816	0.861796	C01083	Organooxygen compounds	Carbohydrates and carbohydrate conjugates	O-glycosyl compounds
organic amino compound	Lys-Pro	(M+H-2H2O)+	146.059	258.098	58824.4	125755	102344	140347	110929	109673	0.828978	0.325242	0.794915	0	0	0	0
Organic oxygen compounds	Amygdalin	M-	457.17	258.767	13599.1	19140.7	15284.9	34234.5	20319.9	14127	0.238022	0.32678	0.699239	0	Organooxygen compounds	0	0
Organic oxygen compounds	D-Lyxose	(M+K-2H)-	187.001	307.131	4090.19	5571.06	11081	3946.58	4505.44	5180.99	0.0366845	0.333535	1.52148	C00476	Carbohydrates and carbohydrate conjugates	0	0
Lipids and lipid-like molecules	1-Palmitoyl-2-linoleoyl-sn-glycero-3-phosphate	(M-H)-	671.464	175.157	53446.8	4707.65	35331.8	11858.1	16433.5	17965.2	0.108077	0.333955	2.02103	0	Lipids and lipid-like molecules	0	0
organic hydroxy compound	2,3-Dihydroxybenzoic acid	(M-H)-	153.017	249.136	17541.5	15969.7	6463.64	16917.8	24492.4	13792	0.247767	0.340703	0.724152	0	Phenols	0	0
Phenylpropanoids and polyketides	Quercitrin	(M+H)+	449.107	157.546	32583.4	43261.7	34206.8	21524.8	61343.5	113972	0.111039	0.343954	0.559094	C01750	Flavonoids	Flavonoid glycosides	Flavonoid-3-O-glycosides
Organic acids and derivatives	Vanillic acid	(M+H)+	169.049	57.777	12240.4	11922.8	21847	13276.9	11615.7	10432.2	0.261872	0.348797	1.30249	C06672	Benzene and substituted derivatives	Benzoic acids and derivatives	M-methoxybenzoic acids and derivatives
Lipids and lipid-like molecules	1-Stearoyl-sn-glycerol	(M+H-H2O)+	341.304	159.187	7603.85	8558	5761.9	5509.16	6561.63	6946.71	0.135675	0.354667	1.15282	0	glycerolipid	glyceride	0
Lipids and lipid-like molecules	Palmitic acid	(M-H)-	255.233	39.147	2.29134e+06	2.97559e+06	1.98908e+06	2.11504e+06	2.10922e+06	2.11623e+06	1.14046	0.354701	1.14439	C00249	Fatty Acyls	Fatty acids and conjugates	Long-chain fatty acids
organic amino compound	L-Arginine	(M+H)+	245.112	417.05	5381.88	1807.36	4012.73	3838.59	1621.75	1937.57	0.257338	0.367897	1.51421	0	0	0	0
organic hydroxy compound	3,4-Dihydroxybenzoic acid	(2M+H)+	309.057	157.828	6860.33	191.6	142.251	153.251	152.02	148.087	0.116912	0.370879	15.8687	0	phenols	hydroxybenzoic acid	0
Organoheterocyclic compounds	Uridine	(M-H)-	243.067	91.151	21620.3	20242.6	28923.1	33678.5	23518.4	25895.4	0.143937	0.371873	0.851898	C00299	Pyrimidine nucleosides	0	Pyrimidine nucleosides
Organic acids and derivatives	L-Pyroglutamic acid	(M+NH4)+	147.075	403.943	16565.3	46879.3	31112.9	21613	28509.8	16844.3	0.491692	0.382614	1.412	C01879	Carboxylic acids and derivatives	"Amino acids, peptides, and analogues"	Alpha amino acids and derivatives
Organic oxygen compounds	Quinate	(M+H)+	193.07	337.41	1.52718e+06	1.78461e+07	1.59365e+07	9.21354e+06	8.29654e+06	774208	3.68803	0.383493	1.93115	C00296	Organooxygen compounds	Alcohols and polyols	Quinic acids and derivatives
organic amino compound	L-Proline	(M+H)+	613.158	494.432	17935.2	7722.83	19255.7	6449.82	6760.08	17283.1	0.600109	0.398856	1.47292	C00127	Carboxylic acids and derivatives	"Amino acids, peptides, and analogues"	Oligopeptides
organic amino compound	L-Serine	(M+H-H2O)+	136.074	231.378	5440.63	10025	7445.38	23759	6484.39	8420.97	0.026731	0.403234	0.592561	C03758	Phenols	Benzenediols	Catecholamines and derivatives
Lipids and lipid-like molecules	1-Palmitoylglycerol	(M+H-H2O)+	313.273	160.563	46879	53288.4	47271.8	39427.9	82927.8	60235.2	0.143002	0.409475	0.807484	0	0	0	0
Organic acids and derivatives	Dihydroxyfumarate	(M+H)+	149.08	46.654	2672.34	4151.82	3006.98	2771.65	23590.9	2610.83	0.100619	0.412425	0.339316	C00975	Keto acids and derivatives	Short-chain keto acids and derivatives	Short-chain keto acids and derivatives
Organic acids and derivatives	1-Aminocyclohexanecarboxylic acid	(M+H)+	144.101	394.007	2542.98	7025.76	4469.49	5509.75	5753.99	6242.91	0.180261	0.429291	0.801879	0	0	0	0
Organic acids and derivatives	1-Aminocyclopropanecarboxylic acid	(M+H-H2O)+	84.0436	375.473	32825.4	80528.2	55742	43676.1	54137.5	31246.9	0.636483	0.431781	1.3102	C01234	Carboxylic acids and derivatives	"Amino acids, peptides, and analogues"	Alpha amino acids
Phenylpropanoids and polyketides	APIIN	(M-H)-	563.135	155.404	226677	139379	225957	180434	217671	334672	1.04748	0.439852	0.807903	C04858	Flavonoids	Flavonoid glycosides	Flavonoid-7-O-glycosides
Phenylpropanoids and polyketides	Daidzein	(M+H)+	255.062	35.83	14603.1	10435.6	8389.66	12991.1	19125.5	9728.64	0.166339	0.443878	0.798855	C10208	Isoflavonoids	Isoflav-2-enes	Isoflavones
Lipids and lipid-like molecules	Erucamide	(M+H)+	338.342	34.885	1.00226e+06	1.04062e+06	1.31434e+06	1.2214e+06	1.41892e+06	1.06518e+06	1.22235	0.459168	0.906012	0	0	0	0
Phenylpropanoids and polyketides	Procyanidin A1	(M+H)+	577.134	184.304	151455	265938	185499	141775	163138	203765	0.803541	0.460495	1.18521	0	0	0	0
Organic oxygen compounds	Erythritol	(M+Na)+	145.048	298.965	28790.5	32704	24990.7	55285	29975.4	24810.7	0.322402	0.462072	0.785721	C00503	Organooxygen compounds	Carbohydrates and carbohydrate conjugates	Sugar alcohols
Organic oxygen compounds	Tartaric acid	(M-H)-	149.009	423.19	58023.3	19230.8	30075.1	29439	25092.2	26970.2	0.0410953	0.500024	1.3169	C00898	Organooxygen compounds	Carbohydrates and carbohydrate conjugates	Sugar acids and derivatives
Organic acids and derivatives	Oxalate	(M-H)-	88.9878	424.807	55204.6	143004	81924.7	87139.8	57677.6	75156.4	0.349281	0.504177	1.27349	C00209	Carboxylic acids and derivatives	Dicarboxylic acids and derivatives	Dicarboxylic acids and derivatives
organic amino compound	Tyramine	(M+CH3CN+H)+	249.144	396.536	127688	321427	308083	240671	162897	211067	0.874707	0.514095	1.23195	0	0	0	0
organic amino compound	His-Val	(M+H-H2O)+	129.101	222.782	6188.65	6842.42	7703.73	4194.07	6533.44	7644.59	0.110629	0.516279	1.1286	C00047	Carboxylic acids and derivatives	"Amino acids, peptides, and analogues"	L-alpha-amino acids
Organic nitrogen compounds	(3-Carboxypropyl)trimethylammonium cation	M+	146.116	383.729	3688.23	2180.74	5347.79	5407.76	5131.16	3132.41	0.0768932	0.520198	0.820459	0	0	0	0
Organoheterocyclic compounds	Nicotine	(M+H)+	163.122	77.008	74608.6	25758.7	19041.2	20046.8	31842.1	30020	0.800537	0.523233	1.45782	C00745	Pyridines and derivatives	Pyrrolidinylpyridines	Pyrrolidinylpyridines
Organic acids and derivatives	DL-4-Hydroxy-2-ketoglutarate	(M+CH3COO)-	221.03	200.962	101063	225268	176405	276201	198005	135472	1.0737	0.54824	0.824591	C01127	Keto acids and derivatives	Gamma-keto acids and derivatives	Gamma-keto acids and derivatives
Organic oxygen compounds	D-Lactose	(M+Na-2H)-	363.092	388.22	14293.3	29392.4	20028.7	21444.3	17347.5	15754	0.0370697	0.552239	1.16809	C00243	Organooxygen compounds	Carbohydrates and carbohydrate conjugates	O-glycosyl compounds
organic amino compound	Dopamine	(M+CH3CN+H)+	319.162	460.316	1010.58	1100.03	1014.6	1711.29	1076.3	840.312	0.128738	0.556831	0.861438	0	0	0	0
Lipids and lipid-like molecules	16-Hydroxypalmitic acid	(M+Na)+	295.226	11.034	1749.21	1729.87	1696.83	1201.99	1645.54	1924.36	0.0343679	0.557816	1.08467	C18218	Fatty Acyls	Fatty acids and conjugates	Long-chain fatty acids
Lipids and lipid-like molecules	Mesaconic acid	(M-H)-	129.019	368.255	67116.8	83781.5	67723.4	149709	58274.2	66498.6	0.408263	0.564827	0.79649	C01732	Fatty Acyls	Fatty acids and conjugates	Methyl-branched fatty acids
organic amino compound	L-Histidine	(M+H-H2O)+	227.102	386.846	4890.43	9431.6	9632.26	8531.47	9539.59	8838.68	0.407353	0.565971	0.890172	0	0	0	0
Organic acids and derivatives	Citrate	(M-H)-	191.019	361.255	12163.7	30875.2	19885.8	30663.3	13930.6	33615.2	0.271787	0.56749	0.804569	C00158	Carboxylic acids and derivatives	Tricarboxylic acids and derivatives	Tricarboxylic acids and derivatives
Organic oxygen compounds	myo-Inositol	(M-H)-	179.056	386.234	2.42672e+06	4.49897e+06	3.24756e+06	3.84442e+06	2.08475e+06	2.78015e+06	0.749132	0.570423	1.16809	C00137	Organooxygen compounds	0	0
Organic oxygen compounds	D-gluconate	(M+CH3COO)-	255.07	253.119	11036.5	14131.5	29625.1	13525.9	10658.3	19210.4	0.0160496	0.577542	1.26267	C00257	Organooxygen compounds	Carbohydrates and carbohydrate conjugates	Sugar acids and derivatives
Lipids and lipid-like molecules	Sebacic acid	(M+CH3CN+H)+	244.153	34.485	1725.93	679.292	440.15	3379.98	970.789	302.598	0.0734676	0.584456	0.611466	C08277	Fatty Acyls	Fatty acids and conjugates	Medium-chain fatty acids
Organic oxygen compounds	1-Palmitoyl-2-hydroxy-sn-glycero-3-phosphoethanolamine	(M+H)+	454.291	200.613	10527.8	34472.5	20137.9	17774.9	18561.5	16619	0.364549	0.591904	1.23006	0	0	0	0
organic amino compound	L-Phenylalanine	(M-H+2Na)+	299.109	397.196	81022.3	216061	207498	167977	119641	137688	0.306756	0.59547	1.1864	0	0	0	0
Organic oxygen compounds	N-Acetyl-D-Glucosamine 6-Phosphate	(M+H)+	302.063	451.89	2387.19	1455.44	9631.47	6310.14	5548.3	6073.67	0.0837764	0.597385	0.751395	C00357	Organooxygen compounds	Carbohydrates and carbohydrate conjugates	Acylaminosugars
Organic oxygen compounds	Ginkgetin	(M-H)-	565.106	421.17	2576.92	2994	1080	2735.95	2629.27	2248.8	0.0612062	0.620753	0.87351	0	Organooxygen compounds	0	0
Lipids and lipid-like molecules	Myristic acid	(M-H)-	227.201	39.0095	187476	178097	237355	262632	148718	113519	0.426149	0.620853	1.14872	C06424	Fatty Acyls	Fatty acids and conjugates	Long-chain fatty acids
organic amino compound	L-Lysine	M+	328.138	176.925	12471.1	11040.9	12034.1	12265.5	13965.4	10890.1	2.36298	0.622267	0.957573	0	0	0	0
organic amino compound	Pro-Thr	M+	175.096	368.915	7163.96	11845.3	5571.62	9140.73	10265.8	8310.14	0.997188	0.623156	0.886864	C00327	Carboxylic acids and derivatives	"Amino acids, peptides, and analogues"	L-alpha-amino acids
Organic acids and derivatives	Betaine	(M+H)+	118.085	386.443	276345	289430	189530	298673	196604	184210	1.21203	0.625933	1.11158	C00719	Carboxylic acids and derivatives	"Amino acids, peptides, and analogues"	Alpha amino acids
organic amino compound	Ile-Asp	(M-2H+3Na)+	333.132	60.0815	2459.9	3941.7	3539.24	3986.92	883.536	3417.97	0.331534	0.628073	1.19936	0	0	0	0
Organoheterocyclic compounds	Jasmine lactone	(M+H)+	169.121	119.124	208049	200886	176334	179544	158662	333639	0.554007	0.633525	0.871138	0	0	0	0
Lipids and lipid-like molecules	Pentadecanoic Acid	(M-H)-	241.216	39.205	155306	133585	158543	135520	181399	87902.2	0.522924	0.639874	1.10526	C16537	Fatty Acyls	Fatty acids and conjugates	Long-chain fatty acids
organic hydroxy compound	Morin	(M+H)+	303.049	157.673	33149.3	153762	64372.7	135664	96679.2	78980.4	0.461527	0.641756	0.807146	0	0	0	0
organic amino compound	S-Lactoylglutathione	(M-H)-	158.082	352.338	2863.79	8634.4	5339.79	5846.78	6155.8	7186.85	0.666706	0.67221	0.877461	0	Carboxylic acids and derivatives	Amino acids, peptides, and analogues	0
Organic acids and derivatives	D(-)-beta-hydroxy butyric acid	(M+Na-2H)-	125.024	460.999	37066.4	59079.4	61844.9	28428.1	44524.9	66712.4	0.178435	0.676315	1.13121	0	Hydroxy acids and derivatives	0	0
organic amino compound	Dimethylglycine	(M+H)+	277.139	453.047	43279.7	1061.66	42783	30771.9	33483.9	40794.8	0.127532	0.697647	0.829356	C00449	Carboxylic acids and derivatives	"Amino acids, peptides, and analogues"	Glutamic acid and derivatives
Organic acids and derivatives	Isocitrate	(M-H2O-H)-	173.009	368.581	412354	585361	389878	627856	396518	476019	1.03849	0.70296	0.92482	C00311	Carboxylic acids and derivatives	Tricarboxylic acids and derivatives	Tricarboxylic acids and derivatives
organic amino compound	Leu-Gln	(M+CH3CN+Na)+	443.13	341.31	1491.56	1873.39	2284.06	2156.95	1624.72	1510.79	0.108274	0.715179	1.06737	C03451	Carboxylic acids and derivatives	"Amino acids, peptides, and analogues"	Oligopeptides
organic amino compound	His-Asp	(M+CH3CN+H)+	244.165	438.339	1214.66	2356.76	2268.04	2280.82	1993.83	1995.98	0.156333	0.723779	0.931237	0	0	0	0
Organic acids and derivatives	Galactonic acid	(M-H)-	195.05	251.537	15418.7	12372.7	12781.3	20191.6	12914.4	10784.4	0.106267	0.731377	0.924406	C00880	Hydroxy acids and derivatives	Medium-chain hydroxy acids and derivatives	Medium-chain hydroxy acids and derivatives
Organoheterocyclic compounds	5,2'-O-dimethyluridine	(M+Na)+	295.096	49.7025	7207.33	6853.14	8122.02	11932.7	6943.83	5469.17	0.0352487	0.735658	0.911147	0	organic heteromonocyclic compound	diazines	0
Organic oxygen compounds	Gentisaldehyde	(M+H)+	139.038	207.505	13650.4	9618.47	16865	19272.4	13708.1	10427	0.245529	0.759268	0.924582	C05585	Organooxygen compounds	Carbonyl compounds	Hydroxybenzaldehydes
organic amino compound	Ile-Leu	(M+H-H2O)+	247.139	351.084	2219.97	4954.43	4493.64	4066.27	4409.9	2147.52	0.320061	0.76746	1.0983	0	0	0	0
Organic acids and derivatives	Acetoacetic acid	(M-H)-	101.024	55.989	33586.6	55378.6	42265.3	48099	43156.2	46105.1	0.308785	0.768788	0.955374	C00164	Keto acids and derivatives	Short-chain keto acids and derivatives	Short-chain keto acids and derivatives
Phenylpropanoids and polyketides	1-Palmitoyl-sn-glycero-3-phosphocholine	(M+H)+	496.338	196.016	65179.4	419529	171662	168952	239323	153850	1.26511	0.786032	1.16766	0	Carboxylic Acids	Acids, Carbocyclic	0
Organic oxygen compounds	D-Glucosamine 1-phosphate (Glucosamine-1P)	(M-H)-	258.039	419.178	2867.41	2082.57	3057.21	4071.76	2855.22	1645.97	0.050722	0.816516	0.934006	C06156	Organooxygen compounds	0	0
Lipids and lipid-like molecules	Linoleic acid	(M-H)-	279.232	39.147	353731	1.06028e+06	601401	662697	634991	571305	1.06527	0.826612	1.07834	C01595	Fatty Acyls	Lineolic acids and derivatives	Lineolic acids and derivatives
organic amino compound	Cyclizine	(M+H-H2O)+	120.08	257.06	56394.9	154043	174925	74918.8	153349	128416	0.801456	0.835853	1.08041	C00483	Benzene and substituted derivatives	Phenethylamines	Phenethylamines
Organic acids and derivatives	EDTA	(M+H)+	293.097	449.322	5863.16	6868.24	6895.8	7426.97	6151.21	5887.25	0.227032	0.930909	1.00831	C00284	Carboxylic acids and derivatives	Tetracarboxylic acids and derivatives	Tetracarboxylic acids and derivatives
Organic acids and derivatives	Agomelatine	(M+CH3COO+2H)+	304.159	455.514	1461.2	2002.36	1262.66	1167.13	2158.47	1295.76	0.0585454	0.931452	1.02269	0	Carboxylic acids and derivatives	Carboxylic acid derivatives	N-acetyl-2-arylethylamines
Organoheterocyclic compounds	5-Methylcytosine	(M+H)+	126.065	192.294	10928	15635.9	14794.8	10659	17374.1	13960.9	0.0827434	0.934469	0.984867	C02376	Diazines	Pyrimidines and pyrimidine derivatives	Hydroxypyrimidines
Lipids and lipid-like molecules	Mevalonic acid	(M+CH3COO)-	207.087	142.868	25718.5	13621.5	17774.2	10119.5	23959.7	21771.6	0.224716	0.943378	1.02262	C00418	Fatty Acyls	Fatty acids and conjugates	Hydroxy fatty acids
Organic acids and derivatives	Larixinic Acid	(M+H)+	127.038	112.62	49740.4	55663.9	34519.2	49235.8	48581.6	43418.9	0.506268	0.950021	0.990705	0	0	0	0
Organic acids and derivatives	Hydroxyproline	(M+CH3COO+2H)+	192.086	357.627	16357.7	50335.9	45816.6	39140.6	32671.8	39039.4	0.489565	0.961866	1.01496	C01157	Carboxylic acids and derivatives	"Amino acids, peptides, and analogues"	Proline and derivatives
Lipids and lipid-like molecules	2-Isopropylmalic acid	(M-H)-	175.061	250.356	57576.2	193705	76208.4	110531	73011.1	137983	0.434232	0.96801	1.01855	C02504	Fatty Acyls	Fatty acids and conjugates	Hydroxy fatty acids
organic amino compound	Glu-Pro	(M+H)+	147.075	377.68	1748.37	7316.26	2988.21	8980.38	2631.62	767.132	1.2206	0.972859	0.973641	C00064	Carboxylic acids and derivatives	"Amino acids, peptides, and analogues"	L-alpha-amino acids
organic amino compound	Leu-Ala	(M+H)+	106.049	380.346	1607.36	5031.57	2305.23	4032.61	1983.63	2874.9	0.140747	0.988968	1.00596	C00065	Carboxylic acids and derivatives	"Amino acids, peptides, and analogues"	Serine and derivatives
Organic acids and derivatives	Acetylglycine	(M-H)-	116.035	395.94	87414.9	3835.46	4357.55	37204.3	23217.6	36039.1	0.287709	0.992419	0.991156	C02055	Carboxylic acids and derivatives	"Amino acids, peptides, and analogues"	N-acyl-alpha amino acids
