# Supplementary material for: Transcriptome and metabolome analyses provide insights into the relevance of pericarp thickness variations in Camellia drupifera and Camellia oleifera
Source: Front Plant Sci. 2022 Oct 27;13:1016475. doi: 10.3389/fpls.2022.1016475 (PMC9647060; doi:10.3389/fpls.2022.1016475)
Supplement: Supplementary Table 3 — DEGs obtained after comparing the transcriptome data of BG and SG. [file Table_3.xlsx]

## Sheet: BG_VS_SG.DEG
DEGs obtained after comparing the transcriptome data of BG and SG.
gene_id	BG_readcount	SG_readcount	log2FC(B/S)	Type	pvalue	padj	NR_annotation	Swissprot_annotation	Pfam_annotation	BP_annotation	MF_annotation	CC_annotation	KO_annotation	Pathway_annotation
TR12364_c0_g1	0	9.83	-5.7414	down	0.0018325	0.049994	-	-	-	-	-	-	-	-
TR5025_c0_g1	12.04	0.33	5.1439	up	0.0018325	0.049994	-	-	-	-	-	-	-	-
TR8507_c0_g1	0.97	17.58	-4.1562	down	0.0018318	0.049987	endo-1,3	-	-	-	-	-	-	-
TR39897_c0_g1	1.03	15.26	-3.9143	down	0.0018294	0.049927	DNA glycosylase/AP lyase ROS1-like [Camellia sinensis]	-	-	-	-	-	-	-
TR10663_c0_g1	8.65	37.67	-2.1208	down	0.001829	0.04992	RNA polymerase II transcriptional coactivator KELP like [Actinidia chinensis var. chinensis]	-	-	-	-	-	-	-
TR66930_c0_g1	0	8.85	-5.5874	down	0.0018283	0.049909	-	-	-	-	-	-	-	-
TR30332_c0_g1	0.31	11.62	-5.0197	down	0.0018284	0.049909	-	-	-	-	-	-	-	-
TR31675_c0_g1	377.67	185.7	1.0243	up	0.0018268	0.049878	LOW QUALITY PROTEIN: protein FMP32, mitochondrial [Camellia sinensis]	-	Protein of unknown function (DUF1640)	-	-	-	-	-
TR122708_c0_g1	0.94	16	-4.0364	down	0.001823	0.049784	-	-	-	-	-	-	-	-
TR24042_c0_g1	11.54	0.32	5.0781	up	0.0018229	0.049784	-	-	-	-	-	-	-	-
TR2914_c0_g1	62.2	158.09	-1.3461	down	0.0018216	0.049755	G-box-binding factor 1-like isoform X1 [Camellia sinensis]|XP_028122422.1 G-box-binding factor 1-like isoform X1 [Camellia sinensis]	-	bZIP transcription factor;Basic region leucine zipper;G-box binding protein MFMR	-	-	-	-	-
TR38660_c0_g2	0	8.61	-5.5464	down	0.0018208	0.049749	uncharacterized protein LOC114283688 [Camellia sinensis]	Putative ribonuclease H protein At1g65750 OS=Arabidopsis thaliana OX=3702 GN=At1g65750 PE=3 SV=1	Reverse transcriptase (RNA-dependent DNA polymerase)	-	-	-	-	-
TR15163_c0_g1	8.78	0	5.6464	up	0.0018211	0.049749	-	-	-	-	-	-	-	-
TR252750_c0_g1	8.78	0	5.6464	up	0.0018211	0.049749	-	-	-	-	-	-	-	-
TR21165_c0_g1	0	8.64	-5.5509	down	0.0018205	0.049748	-	-	-	-	-	-	-	-
TR33552_c0_g1	8.6	0	5.6187	up	0.0018205	0.049748	BOI-related E3 ubiquitin-protein ligase 1-like [Camellia sinensis]	AAA-ATPase At2g46620 OS=Arabidopsis thaliana OX=3702 GN=At2g46620 PE=2 SV=1	-	-	-	-	-	-
TR2332_c2_g1	0.62	15.53	-4.5759	down	0.0018193	0.049726	-	-	-	-	-	-	-	-
TR21129_c2_g1	16.16	1.3	3.6539	up	0.0018175	0.049683	-	-	-	-	-	-	-	-
TR10314_c0_g1	0.31	11.73	-5.0314	down	0.0018161	0.04965	-	-	-	-	-	-	-	-
TR13412_c2_g1	0	8.5	-5.5304	down	0.0018158	0.049647	-	-	-	-	-	-	-	-
TR30785_c0_g1	2.93	21.23	-2.8409	down	0.0018144	0.04963	uncharacterized protein LOC114298817 [Camellia sinensis]	Retrovirus-related Pol polyprotein from transposon RE1 OS=Arabidopsis thaliana OX=3702 GN=RE1 PE=2 SV=1	Reverse transcriptase (RNA-dependent DNA polymerase)	-	-	-	-	-
TR15066_c2_g1	28.02	5.67	2.3006	up	0.0018146	0.04963	-	-	-	-	-	-	-	-
TR14245_c0_g1	11.54	0.3	5.0773	up	0.001815	0.04963	geranylgeranyl diphosphate synthase 7 [Camellia sinensis]	Geranylgeranyl pyrophosphate synthase, chloroplastic OS=Hevea brasiliensis OX=3981 GN=GGPS PE=1 SV=1	Polyprenyl synthetase	-	-	-	K13789|GGPS; geranylgeranyl diphosphate synthase, type II [EC:2.5.1.1 2.5.1.10 2.5.1.29]	ko00900(Metabolism);ko01100(Metabolism);ko01110(Metabolism)
TR13458_c1_g1	8.37	0	5.5782	up	0.0018148	0.04963	-	-	-	-	-	-	-	-
TR33509_c0_g1	14.3	0.63	4.494	up	0.0018139	0.049621	disease resistance RPP13-like protein 4 [Camellia sinensis]	-	-	-	-	-	-	-
TR42615_c0_g1	5.08	35.41	-2.8077	down	0.0018135	0.049617	40s ribosomal protein-like protein S15 [Stagonospora sp. SRC1lsM3a]|OAL55892.1 40s ribosomal protein-like protein S15, partial [Pyrenochaeta sp. DS3sAY3a]	40S ribosomal protein S15 OS=Elaeis oleifera OX=80265 GN=RPS15 PE=2 SV=1	Ribosomal protein S19	metabolic process;peptide metabolic process;nitrogen compound metabolic process;biological_process;biosynthetic process;macromolecule biosynthetic process;cellular process;gene expression;protein metabolic process;cellular nitrogen compound metabolic process;cellular macromolecule biosynthetic process;peptide biosynthetic process;macromolecule metabolic process;cellular amide metabolic process;am…	molecular_function;nucleic acid binding;binding;organic cyclic compound binding;heterocyclic compound binding;structural molecule activity;structural constituent of ribosome;RNA binding	intracellular;cellular_component;ribonucleoprotein complex;ribosome;cell;cytoplasm;protein-containing complex;organelle;non-membrane-bounded organelle;intracellular organelle;intracellular non-membrane-bounded organelle;ribosomal subunit;organelle part;intracellular part;cytoplasmic part;intracellular organelle part;cell part;small ribosomal subunit	K02958|RP-S15e, RPS15; small subunit ribosomal protein S15e	ko03010(Genetic Information Processing)
TR97737_c0_g1	1.31	17.02	-3.685	down	0.0018128	0.049604	-	-	-	-	-	-	-	-
TR983_c1_g1	56.71	12.99	2.1195	up	0.0018122	0.049591	LOW QUALITY PROTEIN: uncharacterized protein LOC114287443 [Camellia sinensis]	G-type lectin S-receptor-like serine/threonine-protein kinase SD1-1 OS=Arabidopsis thaliana OX=3702 GN=SD11 PE=1 SV=1	Protein tyrosine kinase;Protein kinase domain	-	-	-	-	-
TR1705_c2_g1	103.16	40.35	1.357	up	0.0018092	0.049515	uncharacterized protein LOC114279568 [Camellia sinensis]	-	COMM domain	-	-	-	-	-
TR27216_c0_g1	0.7	15.5	-4.5156	down	0.0018086	0.049505	protein LIGHT-DEPENDENT SHORT HYPOCOTYLS 1-like [Camellia sinensis]|XP_028094344.1 protein LIGHT-DEPENDENT SHORT HYPOCOTYLS 1-like [Camellia sinensis]	Protein LIGHT-DEPENDENT SHORT HYPOCOTYLS 2 OS=Arabidopsis thaliana OX=3702 GN=LSH2 PE=1 SV=1	Protein of unknown function (DUF640)	-	-	-	-	-
TR28759_c0_g2	0.66	14.13	-4.4119	down	0.0018083	0.049501	uncharacterized protein LOC114323795 [Camellia sinensis]	Uncharacterized mitochondrial protein AtMg00810 OS=Arabidopsis thaliana OX=3702 GN=AtMg00810 PE=4 SV=1	-	-	-	-	-	-
TR3607_c0_g1	7.75	46.34	-2.5819	down	0.0018059	0.049443	-	-	-	-	-	-	-	-
TR1141_c3_g1	119	327.31	-1.4608	down	0.001806	0.049443	cytochrome P450 87A3-like [Camellia sinensis]	Cytochrome P450 87A3 OS=Oryza sativa subsp. japonica OX=39947 GN=CYP87A3 PE=2 SV=3	Cytochrome P450	-	-	-	-	-
TR86600_c0_g1	8.31	0	5.5676	up	0.0018055	0.049441	-	-	Leucine rich repeat;Leucine Rich repeats (2 copies)	-	-	-	-	-
TR6015_c1_g1	81.15	28.17	1.5269	up	0.0018047	0.049424	-	-	-	-	-	-	-	-
TR73365_c0_g1	0	8.73	-5.5699	down	0.001804	0.049415	putative disease resistance RPP13-like protein 1 [Camellia sinensis]	-	-	-	-	-	-	-
TR17449_c2_g1	0	8.52	-5.5326	down	0.0018042	0.049415	-	-	-	-	-	-	-	-
TR3642_c2_g1	99.96	39.47	1.3412	up	0.0018033	0.049403	chaperone protein dnaJ 1, mitochondrial isoform X5 [Camellia sinensis]	Chaperone protein dnaJ 1, mitochondrial OS=Arabidopsis thaliana OX=3702 GN=ATJ1 PE=2 SV=2	DnaJ C terminal domain;DnaJ domain;DnaJ central domain	-	-	-	-	-
TR400_c0_g1	42.43	7.71	2.4635	up	0.0018029	0.049396	beta-amylase 5 [Camellia sinensis]	Inactive beta-amylase 4, chloroplastic OS=Arabidopsis thaliana OX=3702 GN=BAM4 PE=2 SV=1	Glycosyl hydrolase family 14	-	-	-	-	-
TR13005_c0_g1	43.53	12.45	1.809	up	0.001802	0.049377	xanthohumol 4-O-methyltransferase-like [Camellia sinensis]	Xanthohumol 4-O-methyltransferase OS=Humulus lupulus OX=3486 GN=OMT2 PE=1 SV=1	O-methyltransferase	-	-	-	-	-
TR3054_c9_g1	171.1	342.36	-1.0015	down	0.0018013	0.049369	uncharacterized protein LOC114287517 [Camellia sinensis]	-	-	-	-	-	-	-
TR1334_c5_g1	9.71	104.97	-3.4303	down	0.0017994	0.049322	Dehydration-responsive element-binding protein like [Actinidia chinensis var. chinensis]	Dehydration-responsive element-binding protein 1B OS=Arabidopsis thaliana OX=3702 GN=DREB1B PE=1 SV=2	AP2 domain	-	-	-	-	-
TR28799_c0_g1	12.51	47.4	-1.9258	down	0.0017958	0.049234	protein NUCLEAR FUSION DEFECTIVE 4-like isoform X2 [Camellia sinensis]	-	-	-	-	-	-	-
TR11701_c1_g1	2.71	22.67	-3.0739	down	0.0017954	0.049232	-	-	-	-	-	-	-	-
TR6148_c0_g1	62.39	399.55	-2.6798	down	0.0017954	0.049232	zinc finger protein ZAT10-like [Camellia sinensis]	-	-	-	-	-	-	-
TR61904_c0_g1	8.34	0	5.5736	up	0.0017955	0.049232	-	-	-	-	-	-	-	-
TR9987_c0_g1	8.34	0	5.5736	up	0.0017955	0.049232	-	-	-	-	-	-	-	-
TR19381_c0_g1	9.87	46.26	-2.2254	down	0.0017915	0.049144	LOW QUALITY PROTEIN: receptor-like protein kinase HSL1 [Camellia sinensis]	-	Leucine rich repeat N-terminal domain	-	-	-	-	-
TR112461_c0_g1	9.03	36.23	-2.0054	down	0.001791	0.049134	-	-	-	-	-	-	-	-
TR42017_c0_g1	3.38	27.99	-3.0585	down	0.0017903	0.049122	cinnamoyl-CoA reductase 1-like isoform X1 [Camellia sinensis]	Tetraketide alpha-pyrone reductase 1 OS=Arabidopsis thaliana OX=3702 GN=TKPR1 PE=1 SV=1	-	-	-	-	-	-
TR53961_c0_g1	0.31	11.64	-5.0214	down	0.0017895	0.049105	uncharacterized protein LOC114297424 isoform X1 [Camellia sinensis]	Quinolinate synthase, chloroplastic OS=Arabidopsis thaliana OX=3702 GN=QS PE=1 SV=1	-	-	-	-	-	-
TR9239_c0_g2	11.71	224.6	-4.2568	down	0.0017892	0.049102	aspartic proteinase-like isoform X2 [Camellia sinensis]	Aspartic proteinase OS=Oryza sativa subsp. japonica OX=39947 GN=RAP PE=2 SV=2	Eukaryotic aspartyl protease;Xylanase inhibitor N-terminal;Saposin-like type B, region 2;Saposin-like type B, region 1	-	-	-	-	-
TR60363_c2_g1	0	8.61	-5.5461	down	0.0017876	0.049064	-	-	-	-	-	-	-	-
TR33044_c0_g3	0	8.52	-5.5327	down	0.001787	0.049052	-	-	-	-	-	-	-	-
TR4236_c1_g1	0	8.52	-5.5327	down	0.001787	0.049052	probable complex I intermediate-associated protein 30 [Ziziphus jujuba]|XP_015902221.1 probable complex I intermediate-associated protein 30 [Ziziphus jujuba]|XP_015902229.1 probable complex I intermediate-associated protein 30 [Ziziphus jujuba]	Probable complex I intermediate-associated protein 30 OS=Arabidopsis thaliana OX=3702 GN=At1g17350 PE=1 SV=2	-	-	-	-	-	-
TR16414_c0_g1	39.75	272.9	-2.7806	down	0.0017857	0.049027	peroxidase 73-like isoform X1 [Camellia sinensis]|XP_028063838.1 peroxidase 73-like isoform X2 [Camellia sinensis]	Peroxidase 35 OS=Arabidopsis thaliana OX=3702 GN=PER35 PE=1 SV=1	-	-	-	-	-	-
TR5869_c1_g1	3.3	22.9	-2.7875	down	0.0017847	0.049006	-	-	-	-	-	-	-	-
TR6570_c0_g1	88.7	190.72	-1.1059	down	0.0017841	0.048998	uncharacterized protein LOC114262873 [Camellia sinensis]|XP_028059090.1 uncharacterized protein LOC114262873 [Camellia sinensis]	-	-	-	-	-	-	-
TR74_c4_g1	620.26	306.22	1.0187	up	0.0017841	0.048998	integrin-linked protein kinase 1-like isoform X1 [Camellia sinensis]	Integrin-linked protein kinase 1 OS=Arabidopsis thaliana OX=3702 GN=ILK1 PE=1 SV=1	Protein tyrosine kinase;Protein kinase domain;Ankyrin repeats (3 copies);Ankyrin repeat;Ankyrin repeat;Ankyrin repeats (many copies)	-	-	-	-	-
TR29420_c0_g1	14.51	0.61	4.5352	up	0.0017843	0.048998	-	-	-	-	-	-	-	-
TR5876_c0_g1	31.73	5.92	2.4126	up	0.0017835	0.048995	-	-	-	-	-	-	-	-
TR23920_c0_g1	378.51	185.72	1.0268	up	0.0017833	0.048993	probable calcium-binding protein CML48 [Camellia sinensis]	Probable calcium-binding protein CML48 OS=Arabidopsis thaliana OX=3702 GN=CML48 PE=2 SV=2	EF hand;EF-hand domain;EF hand;EF-hand domain pair;EF-hand domain pair	-	-	-	K13448|CML; calcium-binding protein CML	ko04626(Organismal Systems)
TR29328_c0_g1	8.29	0	5.5654	up	0.0017823	0.048971	-	Adenosylhomocysteinase OS=Catharanthus roseus OX=4058 GN=SAHH PE=2 SV=1	-	-	-	-	-	-
TR5246_c3_g1	8.29	0	5.5654	up	0.0017823	0.048971	-	-	-	-	-	-	-	-
TR16045_c0_g1	8.41	0	5.5848	up	0.0017807	0.048937	-	-	-	-	-	-	-	-
TR29692_c0_g1	2.66	19.7	-2.8873	down	0.001779	0.048898	-	-	-	-	-	-	-	-
TR6204_c0_g1	21.3	74.62	-1.8001	down	0.0017772	0.048852	L-type lectin-domain containing receptor kinase IX.1-like [Camellia sinensis]	Agglutinin-2 OS=Cladrastis kentukea OX=38412 PE=1 SV=1	Legume lectin domain	-	-	-	-	-
TR17494_c1_g2	8.97	0	5.6785	up	0.0017771	0.048852	uncharacterized protein LOC114311146 [Camellia sinensis]	-	-	-	-	-	-	-
TR11151_c1_g2	8.3	0	5.5665	up	0.0017765	0.048848	uncharacterized protein LOC114308663 [Camellia sinensis]	Putative ribonuclease H protein At1g65750 OS=Arabidopsis thaliana OX=3702 GN=At1g65750 PE=3 SV=1	zinc-binding in reverse transcriptase;Reverse transcriptase (RNA-dependent DNA polymerase);Domain of unknown function (DUF4283);Reverse transcriptase (RNA-dependent DNA polymerase);Endonuclease/Exonuclease/phosphatase family;Endonuclease-reverse transcriptase	-	-	-	-	-
TR56617_c0_g1	8.68	0	5.6298	up	0.0017766	0.048848	-	-	-	-	-	-	-	-
TR63457_c0_g1	8.68	0	5.6298	up	0.0017766	0.048848	-	-	-	-	-	-	-	-
TR52344_c0_g1	2.68	20.88	-2.9654	down	0.0017759	0.048843	uncharacterized protein LOC114258087 [Camellia sinensis]	-	gag-polypeptide of LTR copia-type;Retrotransposon gag protein	-	-	-	-	-
TR50549_c0_g1	8.71	0	5.6354	up	0.0017758	0.048843	-	-	-	-	-	-	-	-
TR939_c12_g1	38.91	10.45	1.8958	up	0.0017733	0.048784	UDP-galactose transporter 1-like [Camellia sinensis]	GDP-mannose transporter GONST5 OS=Arabidopsis thaliana OX=3702 GN=GONST5 PE=2 SV=1	-	-	-	-	-	-
TR12200_c0_g2	15.36	1.27	3.5966	up	0.0017723	0.048761	uncharacterized protein LOC114258977 [Camellia sinensis]	-	-	-	-	-	-	-
TR139871_c0_g1	1.39	17.09	-3.6552	down	0.0017717	0.048749	receptor-like protein 12 [Camellia sinensis]	-	-	-	-	-	-	-
TR36079_c0_g1	9.1	37.39	-2.0442	down	0.0017697	0.048707	putative disease resistance RPP13-like protein 3 isoform X2 [Camellia sinensis]	Probable disease resistance protein At1g59620 OS=Arabidopsis thaliana OX=3702 GN=At1g59620 PE=2 SV=3	-	-	-	-	-	-
TR775_c10_g1	70.11	153.29	-1.129	down	0.0017687	0.048694	uncharacterized protein LOC114292014 [Camellia sinensis]	-	-	-	-	-	-	-
TR63303_c0_g1	8.38	0	5.5791	up	0.0017671	0.048656	-	-	-	-	-	-	-	-
TR72632_c0_g1	1.66	16.75	-3.3341	down	0.001766	0.04863	disease resistance protein RPM1-like [Camellia sinensis]	Disease resistance protein RPM1 OS=Arabidopsis thaliana OX=3702 GN=RPM1 PE=1 SV=1	-	-	-	-	-	-
TR20766_c0_g1	229.95	92.97	1.3061	up	0.001766	0.04863	DnaJ protein like [Actinidia chinensis var. chinensis]	DnaJ protein ERDJ3B OS=Arabidopsis thaliana OX=3702 GN=ERDJ3B PE=1 SV=1	DnaJ domain	-	-	-	K09517|DNAJB11; DnaJ homolog subfamily B member 11	ko04141(Genetic Information Processing)
TR11532_c0_g1	90.54	34.33	1.3981	up	0.0017653	0.048628	-	-	-	-	-	-	-	-
TR18593_c0_g2	8.45	0	5.5907	up	0.0017653	0.048628	-	-	-	-	-	-	-	-
TR14247_c1_g1	25.82	2.55	3.3413	up	0.0017647	0.048623	-	-	-	-	-	-	-	-
TR31181_c0_g1	8.91	0	5.6698	up	0.0017648	0.048623	-	-	-	-	-	-	-	-
TR56166_c0_g1	9.38	0	5.7461	up	0.001762	0.048563	-	-	-	-	-	-	-	-
TR34_c0_g3	14.42	59.45	-2.0399	down	0.0017612	0.048551	APETALA2-like protein 3 isoform X1 [Camellia sinensis]	Ethylene-responsive transcription factor RAP2-7 OS=Arabidopsis thaliana OX=3702 GN=RAP2-7 PE=2 SV=2	-	-	-	-	-	-
TR28144_c0_g1	0	8.75	-5.5721	down	0.0017596	0.048512	transcription factor KUA1-like [Camellia sinensis]	-	-	-	-	-	-	-
TR11595_c0_g1	87.37	213.2	-1.2868	down	0.0017585	0.048495	cytochrome P450 710A11-like [Camellia sinensis]	Cytochrome P450 710A11 OS=Solanum lycopersicum OX=4081 GN=CYP710A11 PE=1 SV=1	Cytochrome P450	-	-	-	K09832|CYP710A; sterol 22-desaturase [EC:1.14.19.41]	ko00100(Metabolism);ko01100(Metabolism);ko01110(Metabolism)
TR5305_c2_g1	31.57	7.29	2.1144	up	0.0017586	0.048495	expansin-A8-like [Camellia sinensis]	Expansin-A2 OS=Oryza sativa subsp. japonica OX=39947 GN=EXPA2 PE=2 SV=2	-	-	-	-	-	-
TR23408_c0_g1	8.44	0	5.5893	up	0.0017572	0.048467	-	-	-	-	-	-	-	-
TR7935_c6_g1	83.51	19.84	2.0766	up	0.0017565	0.048454	-	-	-	-	-	-	-	-
TR70767_c0_g1	5.21	29.07	-2.4666	down	0.0017555	0.048432	probable leucine-rich repeat receptor-like serine/threonine-protein kinase At3g14840 isoform X1 [Camellia sinensis]|XP_028119967.1 probable leucine-rich repeat receptor-like serine/threonine-protein kinase At3g14840 isoform X2 [Camellia sinensis]	Receptor like protein 22 OS=Arabidopsis thaliana OX=3702 GN=RLP22 PE=2 SV=1	Leucine rich repeat;Leucine Rich repeats (2 copies);Leucine Rich Repeat	-	-	-	-	-
TR3741_c0_g1	273.5	134.95	1.0191	up	0.001755	0.048432	uncharacterized protein LOC114277761 isoform X2 [Camellia sinensis]	-	-	-	-	-	-	-
TR56498_c0_g1	11.47	0.33	5.0736	up	0.0017552	0.048432	piezo-type mechanosensitive ion channel homolog [Camellia sinensis]	Piezo-type mechanosensitive ion channel homolog OS=Arabidopsis thaliana OX=3702 GN=At2g48060/At2g48040/At2g48050 PE=2 SV=1	-	-	-	-	-	-
TR9525_c0_g1	35.34	8.26	2.0979	up	0.0017485	0.048259	phosphatidylinositol 4-kinase alpha 1-like isoform X2 [Camellia sinensis]	Phosphatidylinositol 4-kinase alpha 1 OS=Arabidopsis thaliana OX=3702 GN=PI4KA1 PE=1 SV=2	Phosphatidylinositol 3- and 4-kinase	-	-	-	K00888|PI4KA; phosphatidylinositol 4-kinase A [EC:2.7.1.67]	ko00562(Metabolism);ko01100(Metabolism);ko04011(Environmental Information Processing);ko04070(Environmental Information Processing)
TR63_c6_g1	268.73	1470.58	-2.4522	down	0.0017479	0.048248	protein ASPARTIC PROTEASE IN GUARD CELL 1-like [Camellia sinensis]	Protein ASPARTIC PROTEASE IN GUARD CELL 1 OS=Arabidopsis thaliana OX=3702 GN=ASPG1 PE=1 SV=1	Xylanase inhibitor N-terminal;Xylanase inhibitor C-terminal;Eukaryotic aspartyl protease	-	-	-	-	-
TR11610_c2_g1	8.38	0	5.5793	up	0.0017474	0.048241	-	-	-	-	-	-	-	-
TR5427_c2_g1	199.06	66.23	1.5877	up	0.0017463	0.048215	-	-	-	-	-	-	-	-
TR33805_c1_g1	0	8.59	-5.5441	down	0.0017452	0.048191	-	-	-	-	-	-	-	-
TR4701_c0_g1	6.27	30.72	-2.2888	down	0.0017415	0.048093	-	-	-	-	-	-	-	-
TR187_c0_g1	8.42	0	5.585	up	0.001737	0.047975	-	-	-	-	-	-	-	-
TR9484_c0_g1	6.19	31.17	-2.3225	down	0.0017368	0.047973	uncharacterized protein LOC114280204 [Camellia sinensis]	-	Ulp1 protease family, C-terminal catalytic domain	-	-	-	-	-
TR9144_c5_g1	0	8.53	-5.5349	down	0.0017365	0.04797	-	-	-	-	-	-	-	-
TR99159_c0_g2	0	8.53	-5.5349	down	0.0017365	0.04797	putative late blight resistance protein homolog R1C-3 [Camellia sinensis]	-	-	-	-	-	-	-
TR2766_c0_g1	16.81	57.32	-1.765	down	0.0017353	0.047949	uncharacterized protein LOC114269857 [Camellia sinensis]|XP_028067008.1 uncharacterized protein LOC114269857 [Camellia sinensis]	-	-	-	-	-	-	-
TR31304_c0_g1	0	8.55	-5.5372	down	0.0017346	0.047936	protein CHROMATIN REMODELING 35 isoform X1 [Camellia sinensis]	Protein CHROMATIN REMODELING 35 OS=Arabidopsis thaliana OX=3702 GN=DRD1 PE=1 SV=1	-	-	-	-	-	-
TR71539_c0_g1	8.35	0	5.5747	up	0.0017347	0.047936	glutathione S-transferase T3-like [Camellia sinensis]	Glutathione S-transferase T3 OS=Arabidopsis thaliana OX=3702 GN=GSTT3 PE=2 SV=1	No apical meristem-associated C-terminal domain	-	-	-	-	-
TR14843_c0_g1	1.39	18.06	-3.7305	down	0.0017335	0.047914	probable disease resistance protein At4g19530 [Camellia sinensis]	-	-	-	-	-	-	-
TR2054_c8_g1	34.76	7.91	2.1364	up	0.0017329	0.047904	-	-	-	-	-	-	-	-
TR139413_c0_g1	0.62	14.75	-4.4989	down	0.0017322	0.04789	TMV resistance protein N-like isoform X2 [Camellia sinensis]	TMV resistance protein N OS=Nicotiana glutinosa OX=35889 GN=N PE=1 SV=1	NB-ARC domain	-	-	-	-	-
TR17705_c0_g3	1.68	18.91	-3.4977	down	0.0017322	0.04789	-	-	-	-	-	-	-	-
TR22564_c1_g1	0	8.76	-5.5743	down	0.0017295	0.047824	-	-	-	-	-	-	-	-
TR58297_c0_g1	36.23	7.43	2.2934	up	0.0017269	0.047763	-	-	-	-	-	-	-	-
TR16472_c1_g1	8.33	0	5.5712	up	0.0017269	0.047763	-	-	-	-	-	-	-	-
TR2200_c12_g1	8.33	0	5.5712	up	0.0017269	0.047763	-	-	-	-	-	-	-	-
TR63407_c1_g2	8.33	0	5.5712	up	0.0017269	0.047763	-	-	-	-	-	-	-	-
TR8239_c1_g2	8.33	0	5.5712	up	0.0017269	0.047763	-	-	-	-	-	-	-	-
TR47032_c0_g1	8.41	0	5.5837	up	0.0017253	0.047747	-	-	-	-	-	-	-	-
TR77261_c1_g1	2.69	21.07	-2.9732	down	0.0017244	0.047727	-	-	-	-	-	-	-	-
TR78571_c0_g1	44.31	2.3	4.2827	up	0.0017242	0.047726	uncharacterized protein LOC114272312 [Camellia sinensis]	-	MULE transposase domain;MuDR family transposase;Transposase, Mutator family;SWIM zinc finger	-	-	-	-	-
TR110290_c0_g1	8.5	0	5.6033	up	0.0017232	0.047703	-	-	-	-	-	-	-	-
TR28717_c2_g1	8.5	0	5.6033	up	0.0017232	0.047703	-	-	-	-	-	-	-	-
TR189616_c0_g1	0	9.01	-5.6148	down	0.0017227	0.047701	-	-	-	-	-	-	-	-
TR62166_c0_g1	443.26	188.95	1.2297	up	0.0017226	0.047701	sugar carrier protein C-like [Camellia sinensis]	Sugar transport protein 1 OS=Arabidopsis thaliana OX=3702 GN=STP1 PE=1 SV=2	Sugar (and other) transporter;Major Facilitator Superfamily	-	-	-	-	-
TR26965_c1_g1	0	10.43	-5.8251	down	0.001722	0.047696	carboxylesterase 1-like [Camellia sinensis]	Carboxylesterase 1 OS=Actinidia eriantha OX=165200 GN=CXE1 PE=1 SV=1	alpha/beta hydrolase fold	-	-	-	-	-
TR341_c2_g1	3468.52	792.48	2.13	up	0.0017222	0.047696	guanylate kinase 2 isoform X1 [Camellia sinensis]	Guanylate kinase 2 OS=Arabidopsis thaliana OX=3702 GN=GK-2 PE=2 SV=1	Guanylate kinase;CG-1 domain	-	-	-	K00942|E2.7.4.8, gmk; guanylate kinase [EC:2.7.4.8]	ko00230(Metabolism);ko01100(Metabolism)
TR9024_c1_g1	44.68	137.51	-1.625	down	0.0017205	0.047663	uncharacterized protein LOC114310624 [Camellia sinensis]	-	-	-	-	-	-	-
TR52811_c0_g1	8.44	0	5.5882	up	0.0017206	0.047663	-	-	-	-	-	-	-	-
TR2520_c8_g1	0	9.29	-5.6557	down	0.0017196	0.047646	heat shock protein 70 [Pyrenochaeta sp. DS3sAY3a]	Luminal-binding protein 4 OS=Nicotiana tabacum OX=4097 GN=BIP4 PE=2 SV=1	Hsp70 protein	-	nucleotide binding;molecular_function;binding;drug binding;purine nucleotide binding;adenyl nucleotide binding;ribonucleotide binding;purine ribonucleotide binding;adenyl ribonucleotide binding;purine ribonucleoside triphosphate binding;small molecule binding;ion binding;anion binding;organic cyclic compound binding;carbohydrate derivative binding;nucleoside phosphate binding;heterocyclic compoun…	-	-	-
TR11876_c0_g3	19.39	364.21	-4.2297	down	0.0017193	0.047643	ethylene-responsive transcription factor ERF017-like [Camellia sinensis]	Ethylene-responsive transcription factor ERF017 OS=Arabidopsis thaliana OX=3702 GN=ERF017 PE=2 SV=1	AP2 domain	-	-	-	-	-
TR61857_c0_g1	15.16	0.61	4.5995	up	0.0017172	0.04759	uncharacterized protein LOC114288621 [Camellia sinensis]	-	-	-	-	-	-	-
TR72444_c0_g1	0.35	11.71	-5.0295	down	0.0017167	0.047581	putative inactive glutathione hydrolase 4 [Camellia sinensis]	Glutathione hydrolase 2 OS=Arabidopsis thaliana OX=3702 GN=GGT2 PE=2 SV=1	-	-	-	-	-	-
TR46799_c0_g1	1.02	16.26	-4.0084	down	0.0017162	0.047574	-	-	-	-	-	-	-	-
TR8870_c1_g2	0	8.64	-5.5507	down	0.0017126	0.047488	-	-	-	-	-	-	-	-
TR11849_c1_g1	5.07	26.94	-2.418	down	0.0017128	0.047488	-	-	-	-	-	-	-	-
TR13590_c0_g1	47.13	13.25	1.8298	up	0.0017113	0.047457	-	Protein disulfide-isomerase 5-2 OS=Arabidopsis thaliana OX=3702 GN=PDIL5-2 PE=1 SV=1	Thioredoxin	-	-	-	-	-
TR1951_c0_g2	9.05	0	5.694	up	0.0017109	0.047453	hypothetical protein CISIN_1g012251mg [Citrus sinensis]|KDO50083.1 hypothetical protein CISIN_1g012251mg [Citrus sinensis]	Transmembrane 9 superfamily member 1 OS=Arabidopsis thaliana OX=3702 GN=TMN1 PE=1 SV=1	-	-	-	-	-	-
TR12957_c0_g1	0.35	11.78	-5.0377	down	0.0017095	0.047429	uncharacterized protein LOC114302369 [Camellia sinensis]	-	-	-	-	-	-	-
TR13990_c0_g1	0	8.79	-5.5787	down	0.001708	0.047393	-	-	-	-	-	-	-	-
TR37511_c0_g1	0	8.79	-5.5787	down	0.001708	0.047393	putative receptor protein kinase ZmPK1 [Camellia sinensis]	-	D-mannose binding lectin	-	-	-	-	-
TR19793_c0_g3	0	8.67	-5.5553	down	0.0017068	0.047374	-	-	-	-	-	-	-	-
TR37366_c0_g1	11.36	0.3	5.0565	up	0.001707	0.047374	putative late blight resistance protein homolog R1B-23 [Camellia sinensis]	-	-	-	-	-	-	-
TR10747_c2_g1	8.43	0	5.5872	up	0.0017058	0.047351	-	-	-	-	-	-	-	-
TR37419_c0_g1	8.43	0	5.5872	up	0.0017058	0.047351	-	-	-	-	-	-	-	-
TR28474_c0_g2	9.07	0	5.6928	up	0.0017057	0.047351	heterogeneous nuclear ribonucleoprotein A3 homolog 2-like isoform X2 [Camellia sinensis]	-	-	-	-	-	-	-
TR52941_c0_g1	0	26.66	-7.1775	down	0.0017046	0.04734	ATP synthase F1, gamma subunit, partial [Rhizoctonia solani AG-3 Rhs1AP]	ATP synthase subunit gamma, mitochondrial OS=Ipomoea batatas OX=4120 GN=ATPC PE=1 SV=2	ATP synthase;ATP synthase	-	-	-	K02136|ATPeF1G, ATP5C1, ATP3; F-type H+-transporting ATPase subunit gamma	ko00190(Metabolism);ko01100(Metabolism);ko04714(Organismal Systems)
TR32247_c0_g1	8.36	0	5.5758	up	0.0017037	0.04732	uncharacterized protein LOC114323546 isoform X2 [Camellia sinensis]	-	-	-	-	-	-	-
TR42493_c0_g1	8.36	0	5.5758	up	0.0017037	0.04732	uncharacterized protein LOC114277329 [Camellia sinensis]	-	-	-	-	-	-	-
TR4034_c1_g1	8.99	0	5.6821	up	0.0017033	0.04732	-	-	-	-	-	-	-	-
TR23021_c0_g2	8.7	0	5.6337	up	0.0017027	0.047309	-	-	-	-	-	-	-	-
TR7883_c3_g1	0	8.58	-5.5418	down	0.001702	0.047295	-	-	-	-	-	-	-	-
TR831_c5_g1	4.02	24.98	-2.6385	down	0.0017018	0.047295	-	-	-	-	-	-	-	-
TR70117_c0_g1	0	8.65	-5.553	down	0.0017013	0.047286	receptor-like protein EIX1 [Camellia sinensis]	-	Leucine rich repeat;Leucine Rich repeats (2 copies)	-	-	-	-	-
TR61828_c0_g2	0	9.03	-5.6138	down	0.0017006	0.047272	-	-	-	-	-	-	-	-
TR29029_c0_g2	18.61	1.54	3.5741	up	0.0016994	0.047244	uncharacterized protein LOC114306493 isoform X1 [Camellia sinensis]|XP_028107540.1 uncharacterized protein LOC114306493 isoform X1 [Camellia sinensis]|XP_028107541.1 uncharacterized protein LOC114306493 isoform X1 [Camellia sinensis]|XP_028107542.1 uncharacterized protein LOC114306493 isoform X1 [Camellia sinensis]	-	-	-	-	-	-	-
TR77215_c0_g1	1.65	17.77	-3.4221	down	0.0016974	0.047191	ubiquitin carboxyl-terminal hydrolase 12-like isoform X3 [Camellia sinensis]	Ubiquitin carboxyl-terminal hydrolase 12 OS=Arabidopsis thaliana OX=3702 GN=UBP12 PE=1 SV=2	MATH domain	-	-	-	-	-
TR26348_c0_g1	8.4	0	5.5826	up	0.0016951	0.047135	serine/arginine-rich splicing factor SC35-like [Camellia sinensis]	-	-	-	-	-	-	-
TR52_c9_g1	8.4	0	5.5826	up	0.0016951	0.047135	-	-	-	-	-	-	-	-
TR11502_c0_g1	92.92	205.37	-1.1456	down	0.0016939	0.04711	disease resistance RPP13-like protein 4 [Camellia sinensis]	-	Leucine Rich repeats (2 copies)	-	-	-	-	-
TR138743_c0_g1	0	8.84	-5.5856	down	0.0016928	0.047085	disease resistance protein RPM1-like isoform X1 [Camellia sinensis]	-	-	-	-	-	-	-
TR8480_c2_g1	120.04	37.25	1.6896	up	0.0016926	0.047084	Protein anachronism like [Actinidia chinensis var. chinensis]	-	-	-	-	-	-	-
TR30696_c0_g1	30.89	95.2	-1.6179	down	0.0016916	0.047063	-	-	-	-	-	-	-	-
TR53889_c1_g2	0	9.22	-5.6467	down	0.00169	0.047026	-	-	-	-	-	-	-	-
TR4458_c9_g2	0	8.61	-5.5462	down	0.0016898	0.047026	-	-	-	-	-	-	-	-
TR82114_c1_g1	0	8.61	-5.5462	down	0.0016898	0.047026	-	-	-	-	-	-	-	-
TR62604_c0_g1	0.69	14.19	-4.3978	down	0.0016901	0.047026	dnaJ protein P58IPK homolog [Camellia sinensis]	DnaJ protein P58IPK homolog B OS=Oryza sativa subsp. japonica OX=39947 GN=P58B PE=1 SV=1	Tetratricopeptide repeat;Tetratricopeptide repeat;TPR repeat;Tetratricopeptide repeat;Tetratricopeptide repeat;Tetratricopeptide repeat;Tetratricopeptide repeat;Bacterial transcriptional activator domain	-	-	-	K09523|DNAJC3; DnaJ homolog subfamily C member 3	ko04141(Genetic Information Processing)
TR428_c3_g1	908.65	9801.63	-3.4312	down	0.0016896	0.047026	-	-	-	-	-	-	-	-
TR46304_c2_g1	5.01	30.81	-2.6221	down	0.0016895	0.047026	putative wall-associated receptor kinase-like 16 [Camellia sinensis]	Wall-associated receptor kinase 2 OS=Arabidopsis thaliana OX=3702 GN=WAK2 PE=1 SV=1	Wall-associated receptor kinase galacturonan-binding;Wall-associated kinase	-	-	-	-	-
TR16116_c0_g1	43.53	9.26	2.2339	up	0.0016888	0.047026	WAT1-related protein At4g30420-like [Camellia sinensis]	WAT1-related protein At4g30420 OS=Arabidopsis thaliana OX=3702 GN=At4g30420 PE=3 SV=1	EamA-like transporter family	-	-	-	-	-
TR55375_c0_g1	16.22	1.24	3.6909	up	0.0016896	0.047026	-	-	-	-	-	-	-	-
TR37282_c0_g1	8.39	0	5.5815	up	0.0016894	0.047026	-	-	-	-	-	-	-	-
TR1514_c2_g1	78.01	436.7	-2.4853	down	0.001688	0.047014	transcription factor bHLH35-like [Camellia sinensis]	Transcription factor bHLH35 OS=Arabidopsis thaliana OX=3702 GN=BHLH35 PE=2 SV=1	Helix-loop-helix DNA-binding domain	-	-	-	-	-
TR17080_c0_g1	0	8.95	-5.6028	down	0.0016877	0.047012	pectinesterase-like [Camellia sinensis]	Putative pectinesterase/pectinesterase inhibitor 38 OS=Arabidopsis thaliana OX=3702 GN=PME38 PE=3 SV=1	-	-	-	-	-	-
TR29137_c0_g1	66.91	18.15	1.8835	up	0.0016877	0.047012	cellulose synthase-like protein G2 [Camellia sinensis]	Probable mixed-linked glucan synthase 7 OS=Oryza sativa subsp. japonica OX=39947 GN=CSLF7 PE=1 SV=1	Cellulose synthase	-	-	-	-	-
TR6180_c0_g1	0.34	12.44	-5.1154	down	0.0016865	0.04699	-	-	-	-	-	-	-	-
TR31178_c2_g1	0.97	15.28	-3.952	down	0.0016853	0.046964	uncharacterized protein LOC114272217 [Camellia sinensis]	Retrovirus-related Pol polyprotein from transposon RE1 OS=Arabidopsis thaliana OX=3702 GN=RE1 PE=2 SV=1	-	-	-	-	-	-
TR125708_c0_g1	3.19	27.18	-3.0657	down	0.0016854	0.046964	-	-	-	-	-	-	-	-
TR6190_c0_g1	780.8	1600.11	-1.0352	down	0.001685	0.046963	RPM1-interacting protein 4-like [Camellia sinensis]	RPM1-interacting protein 4 OS=Arabidopsis thaliana OX=3702 GN=RIN4 PE=1 SV=1	Cleavage site for pathogenic type III effector avirulence factor Avr	-	-	-	K13456|RIN4; RPM1-interacting protein 4	ko04626(Organismal Systems)
TR64230_c1_g1	0	9.44	-5.681	down	0.0016842	0.04695	-	-	-	-	-	-	-	-
TR4699_c1_g1	13.4	46.98	-1.8131	down	0.0016843	0.04695	-	-	-	-	-	-	-	-
TR22738_c0_g1	19.33	2.53	2.9324	up	0.001684	0.04695	kinesin-like protein KIN-5C [Camellia sinensis]	Kinesin-like protein KIN-5C OS=Nicotiana tabacum OX=4097 GN=KIN5C PE=1 SV=1	Kinesin motor domain;Microtubule binding	-	-	-	-	-
TR53156_c0_g1	125.64	49.22	1.3515	up	0.0016837	0.046948	magnesium transporter MRS2-E-like isoform X2 [Camellia sinensis]	Magnesium transporter MRS2-F OS=Oryza sativa subsp. indica OX=39946 GN=MRS2-F PE=3 SV=1	-	-	-	-	-	-
TR25538_c1_g2	6.2	34.46	-2.4667	down	0.0016825	0.04692	zinc-regulated protein 8-like [Camellia sinensis]	-	-	-	-	-	-	-
TR3498_c0_g1	22.07	69.54	-1.6528	down	0.0016817	0.046903	homeobox-leucine zipper protein MERISTEM L1-like [Camellia sinensis]|XP_028124331.1 homeobox-leucine zipper protein MERISTEM L1-like [Camellia sinensis]|XP_028124332.1 homeobox-leucine zipper protein MERISTEM L1-like [Camellia sinensis]|XP_028124333.1 homeobox-leucine zipper protein MERISTEM L1-like [Camellia sinensis]|XP_028124334.1 homeobox-leucine zipper protein MERISTEM L1-like [Camellia sine…	Homeobox-leucine zipper protein PROTODERMAL FACTOR 2 OS=Arabidopsis thaliana OX=3702 GN=PDF2 PE=2 SV=1	START domain;Homeobox domain	-	-	-	-	-
TR932_c0_g1	21092.1	10071.4	1.0664	up	0.0016795	0.046846	beta-galactosidase 8-like [Camellia sinensis]	Beta-galactosidase 8 OS=Arabidopsis thaliana OX=3702 GN=BGAL8 PE=2 SV=2	Galactose binding lectin domain;Glycosyl hydrolases family 35;AMP-binding enzyme;AMP-binding enzyme C-terminal domain;SNO glutamine amidotransferase family;CobB/CobQ-like glutamine amidotransferase domain	-	-	-	-	-
TR97165_c1_g2	0.62	14.99	-4.5197	down	0.0016791	0.046839	G-type lectin S-receptor-like serine/threonine-protein kinase SD1-1 isoform X7 [Camellia sinensis]	Receptor-like serine/threonine-protein kinase SD1-6 OS=Arabidopsis thaliana OX=3702 GN=SD16 PE=1 SV=2	-	-	-	-	-	-
TR8994_c0_g1	5.43	30.43	-2.4938	down	0.0016787	0.046835	-	-	-	-	-	-	-	-
TR3096_c0_g2	1.01	16.09	-4.0037	down	0.0016779	0.046816	-	-	-	-	-	-	-	-
TR25422_c0_g1	17.5	1.6	3.4581	up	0.0016768	0.04679	kinesin-like protein KIN-6 isoform X4 [Camellia sinensis]	Kinesin-like protein KIN-6 OS=Arabidopsis thaliana OX=3702 GN=KIN6 PE=3 SV=2	-	-	-	-	-	-
TR9001_c1_g1	21.78	66.9	-1.6214	down	0.0016757	0.046772	-	-	-	-	-	-	-	-
TR18282_c0_g2	13.75	0.62	4.4465	up	0.0016755	0.046771	-	-	-	-	-	-	-	-
TR144747_c0_g1	1.37	18.11	-3.7469	down	0.0016732	0.046713	-	-	-	-	-	-	-	-
TR34447_c1_g1	5.69	32.42	-2.5144	down	0.0016732	0.046713	LOW QUALITY PROTEIN: protein DETOXIFICATION 12-like [Camellia sinensis]	-	-	-	-	-	-	-
TR28962_c0_g1	2.98	21.56	-2.8498	down	0.0016724	0.046704	-	-	-	-	-	-	-	-
TR1960_c2_g2	54.85	133.13	-1.2801	down	0.0016725	0.046704	GTPase-activating protein like [Actinidia chinensis var. chinensis]	-	-	-	-	-	-	-
TR68061_c0_g1	0.35	11.77	-5.0361	down	0.0016716	0.046696	probable WRKY transcription factor 41 [Camellia sinensis]	Probable WRKY transcription factor 53 OS=Arabidopsis thaliana OX=3702 GN=WRKY53 PE=1 SV=1	-	-	-	-	-	-
TR4118_c0_g3	3.26	23.82	-2.8543	down	0.0016719	0.046696	uncharacterized protein LOC114320270 [Camellia sinensis]|XP_028123203.1 uncharacterized protein LOC114320270 [Camellia sinensis]|XP_028123204.1 uncharacterized protein LOC114320270 [Camellia sinensis]	-	Acetyltransferase (GNAT) family	-	-	-	-	-
TR12849_c1_g1	33.08	89.51	-1.4391	down	0.0016718	0.046696	DNA oxidative demethylase ALKBH2 isoform X1 [Camellia sinensis]	DNA oxidative demethylase ALKBH2 OS=Arabidopsis thaliana OX=3702 GN=ALKBH2 PE=2 SV=2	2OG-Fe(II) oxygenase superfamily	-	-	-	-	-
TR838_c7_g1	46.55	147.99	-1.6683	down	0.0016709	0.046684	L-ascorbate oxidase-like [Camellia sinensis]|AVZ45851.1 L-ascorbate oxidase family protein [Camellia sinensis]	L-ascorbate oxidase OS=Cucurbita pepo var. melopepo OX=3665 PE=1 SV=1	Multicopper oxidase;Multicopper oxidase	-	-	-	-	-
TR54065_c0_g1	19.65	1.96	3.342	up	0.0016697	0.046656	probable LRR receptor-like serine/threonine-protein kinase At3g47570 [Camellia sinensis]	-	-	-	-	-	-	-
TR7603_c7_g1	0	8.79	-5.579	down	0.0016694	0.046652	-	-	-	-	-	-	-	-
TR64622_c0_g1	2.62	20.26	-2.9389	down	0.001668	0.046617	-	-	-	-	-	-	-	-
TR10087_c0_g1	101.4	214.23	-1.0785	down	0.0016666	0.046584	protein MICROTUBULE BINDING PROTEIN 2C-like [Camellia sinensis]	Protein MICROTUBULE BINDING PROTEIN 2C OS=Nicotiana tabacum OX=4097 GN=MBP2C PE=1 SV=1	-	-	-	-	-	-
TR54699_c0_g1	318.09	125.71	1.3407	up	0.0016659	0.04657	UPF0603 protein At1g54780, chloroplastic [Camellia sinensis]	UPF0603 protein At1g54780, chloroplastic OS=Arabidopsis thaliana OX=3702 GN=At1g54780 PE=1 SV=1	TPM domain	-	-	-	-	-
TR580_c6_g1	0.35	11.91	-5.0553	down	0.0016654	0.046561	-	-	-	-	-	-	-	-
TR7649_c0_g1	24.83	3.89	2.6881	up	0.0016625	0.04649	probable LRR receptor-like serine/threonine-protein kinase PAM74 [Camellia sinensis]	Probable LRR receptor-like serine/threonine-protein kinase PAM74 OS=Arabidopsis thaliana OX=3702 GN=PAM74 PE=1 SV=1	Carbohydrate-binding protein of the ER;Leucine Rich repeats (2 copies);Leucine rich repeat	-	-	-	-	-
TR20636_c0_g1	114.29	48.11	1.2475	up	0.0016622	0.046488	pentatricopeptide repeat-containing protein At4g01990, mitochondrial-like [Camellia sinensis]	Pentatricopeptide repeat-containing protein At4g01990, mitochondrial OS=Arabidopsis thaliana OX=3702 GN=At4g01990 PE=2 SV=1	PPR repeat family;PPR repeat;PPR repeat;Pentacotripeptide-repeat region of PRORP;Pentatricopeptide repeat domain	-	-	-	-	-
TR3581_c0_g2	132.27	58.8	1.1701	up	0.0016594	0.046421	-	-	-	-	-	-	-	-
TR62319_c0_g1	0.7	14.84	-4.4571	down	0.0016584	0.046402	tau class glutathione transferase GSTU16 [Populus trichocarpa]	Glutathione S-transferase U23 OS=Arabidopsis thaliana OX=3702 GN=GSTU23 PE=1 SV=1	-	-	-	-	-	-
TR976_c1_g2	57.71	14.24	2.0265	up	0.001658	0.046395	transcription factor MYB108-like [Camellia sinensis]	Transcription factor MYB108 OS=Arabidopsis thaliana OX=3702 GN=MYB108 PE=1 SV=1	Myb-like DNA-binding domain;Myb-like DNA-binding domain	-	-	-	-	-
TR23617_c0_g1	512.72	207.49	1.3052	up	0.0016567	0.046366	L-type lectin-domain containing receptor kinase VII.1 [Camellia sinensis]	L-type lectin-domain containing receptor kinase VII.1 OS=Arabidopsis thaliana OX=3702 GN=LECRK71 PE=2 SV=1	Legume lectin domain;Protein kinase domain;Protein tyrosine kinase	-	-	-	-	-
TR20567_c1_g1	29.08	5.14	2.506	up	0.0016567	0.046366	-	-	-	-	-	-	-	-
TR10658_c1_g1	9.26	37.36	-2.0075	down	0.0016556	0.046344	uncharacterized protein LOC114264133 [Camellia sinensis]	-	-	-	-	-	-	-
TR64387_c0_g2	0	8.61	-5.5463	down	0.0016552	0.046338	spermatogenesis-associated protein 20 isoform X1 [Camellia sinensis]	-	-	-	-	-	-	-
TR14406_c3_g1	0.31	12.2	-5.0899	down	0.0016536	0.046305	-	-	-	-	-	-	-	-
TR231768_c0_g1	8.61	0	5.6203	up	0.0016538	0.046305	-	-	-	-	-	-	-	-
TR3063_c1_g1	8.61	0	5.6203	up	0.0016538	0.046305	-	-	-	-	-	-	-	-
TR5052_c0_g3	0.31	12.17	-5.0841	down	0.0016532	0.046303	protein SEH1-like [Camellia sinensis]	Protein SEH1 OS=Arabidopsis thaliana OX=3702 GN=SEH1 PE=1 SV=1	-	-	-	-	-	-
TR208_c2_g1	9.45	38.55	-2.0333	down	0.0016514	0.046257	protein IQ-DOMAIN 1-like [Camellia sinensis]|XP_028078744.1 protein IQ-DOMAIN 1-like [Camellia sinensis]|XP_028078746.1 protein IQ-DOMAIN 1-like [Camellia sinensis]|XP_028078747.1 protein IQ-DOMAIN 1-like [Camellia sinensis]|XP_028078748.1 protein IQ-DOMAIN 1-like [Camellia sinensis]|XP_028078749.1 protein IQ-DOMAIN 1-like [Camellia sinensis]|XP_028078750.1 protein IQ-DOMAIN 1-like [Camellia sine…	-	-	-	-	-	-	-
TR4676_c0_g1	29.06	259.04	-3.154	down	0.0016505	0.046239	dehydration-responsive element-binding protein 1A-like [Camellia sinensis]	Dehydration-responsive element-binding protein 1D OS=Arabidopsis thaliana OX=3702 GN=DREB1D PE=2 SV=1	AP2 domain	-	-	-	-	-
TR16269_c0_g1	357.95	169.55	1.078	up	0.0016505	0.046239	DEAD-box ATP-dependent RNA helicase 5 [Camellia sinensis]	DEAD-box ATP-dependent RNA helicase 5 OS=Arabidopsis thaliana OX=3702 GN=RH5 PE=1 SV=1	DEAD/DEAH box helicase	-	-	-	-	-
TR5028_c0_g1	9.05	38.42	-2.0882	down	0.00165	0.046233	probable disease resistance protein RF45 [Camellia sinensis]|XP_028064167.1 probable disease resistance protein RF45 [Camellia sinensis]	Late blight resistance protein R1-A OS=Solanum demissum OX=50514 GN=R1A PE=3 SV=1	-	-	-	-	-	-
TR87131_c0_g1	0.31	11.74	-5.0328	down	0.0016459	0.046125	LOW QUALITY PROTEIN: mechanosensitive ion channel protein 10-like [Ananas comosus]	-	-	-	-	-	-	-
TR39708_c0_g1	0.34	11.78	-5.0377	down	0.0016443	0.046085	-	-	-	-	-	-	-	-
TR274831_c0_g1	0.34	11.83	-5.0427	down	0.001644	0.046082	-	-	-	-	-	-	-	-
TR8867_c0_g1	36.03	91.66	-1.3474	down	0.0016435	0.046073	mechanosensitive ion channel protein 10-like [Camellia sinensis]|XP_028074550.1 mechanosensitive ion channel protein 10-like [Camellia sinensis]	Mechanosensitive ion channel protein 10 OS=Arabidopsis thaliana OX=3702 GN=MSL10 PE=1 SV=1	Mechanosensitive ion channel	-	-	-	-	-
TR1159_c0_g1	28.25	75.72	-1.4217	down	0.0016431	0.046067	uncharacterized protein LOC114266248 isoform X2 [Camellia sinensis]	-	-	-	-	-	-	-
TR27372_c0_g1	0.7	15.48	-4.5169	down	0.001642	0.04604	-	-	-	-	-	-	-	-
TR55215_c0_g1	14.89	0.64	4.5529	up	0.0016414	0.046034	-	-	-	-	-	-	-	-
TR30927_c0_g2	8.8	0	5.6534	up	0.0016413	0.046034	-	-	-	-	-	-	-	-
TR104624_c0_g1	8.84	0	5.6552	up	0.0016416	0.046034	-	-	-	-	-	-	-	-
TR69406_c0_g1	14.06	0.65	4.4586	up	0.0016393	0.045992	-	-	-	-	-	-	-	-
TR105037_c0_g1	0.35	12.56	-5.1318	down	0.0016386	0.045976	-	-	-	-	-	-	-	-
TR5366_c2_g1	0.68	15.08	-4.4867	down	0.0016363	0.045915	-	-	-	-	-	-	-	-
TR19742_c0_g1	46.56	11.16	2.0609	up	0.0016348	0.045879	uncharacterized protein LOC114302295 [Camellia sinensis]|XP_028103101.1 uncharacterized protein LOC114302295 [Camellia sinensis]	-	RecX family	-	-	-	-	-
TR10736_c0_g2	0	8.89	-5.594	down	0.0016345	0.045876	-	-	-	-	-	-	-	-
TR10634_c0_g1	409.03	196.08	1.0607	up	0.0016344	0.045876	exosome complex component RRP4 homolog [Camellia sinensis]	Exosome complex component RRP4 homolog OS=Arabidopsis thaliana OX=3702 GN=RRP4 PE=1 SV=1	KH domain	-	-	-	K03679|RRP4, EXOSC2; exosome complex component RRP4	ko03018(Genetic Information Processing)
TR1484_c2_g1	3.57	26.33	-2.8676	down	0.0016339	0.045871	putative disease resistance RPP13-like protein 1 [Camellia sinensis]|XP_028103849.1 putative disease resistance RPP13-like protein 1 [Camellia sinensis]|XP_028103850.1 putative disease resistance RPP13-like protein 1 [Camellia sinensis]|XP_028103851.1 putative disease resistance RPP13-like protein 1 [Camellia sinensis]|XP_028103852.1 putative disease resistance RPP13-like protein 1 [Camellia sine…	Putative disease resistance protein RGA3 OS=Solanum bulbocastanum OX=147425 GN=RGA3 PE=2 SV=2	NB-ARC domain	-	-	-	-	-
TR11942_c2_g1	8.55	0	5.6111	up	0.0016339	0.045871	-	-	-	-	-	-	-	-
TR134890_c0_g1	8.55	0	5.6111	up	0.0016339	0.045871	LOW QUALITY PROTEIN: ubiquitin carboxyl-terminal hydrolase 2-like [Camellia sinensis]	-	-	-	-	-	-	-
TR18277_c0_g1	8.55	0	5.6111	up	0.0016339	0.045871	NAC domain-containing protein 2-like [Camellia sinensis]	NAC domain-containing protein 2 OS=Arabidopsis thaliana OX=3702 GN=NAC002 PE=2 SV=2	-	-	-	-	-	-
TR11128_c0_g1	21.7	63.09	-1.5396	down	0.0016318	0.045831	protein MAIN-LIKE 1-like [Camellia sinensis]	-	-	-	-	-	-	-
TR248_c2_g2	61.38	20.16	1.6034	up	0.0016297	0.045783	uncharacterized protein LOC114302131 [Camellia sinensis]	Probable E3 ubiquitin-protein ligase RHG1A OS=Arabidopsis thaliana OX=3702 GN=RHG1A PE=2 SV=1	Ring finger domain;RING-H2 zinc finger domain;Zinc finger, C3HC4 type (RING finger);zinc-RING finger domain;RING-like zinc finger;Zinc finger, C3HC4 type (RING finger);RING-type zinc-finger;Zinc finger, C3HC4 type (RING finger)	-	-	-	-	-
TR9544_c1_g1	152.29	396.39	-1.3794	down	0.0016288	0.045763	gamma-glutamylcyclotransferase 2-2 [Camellia sinensis]	Gamma-glutamylcyclotransferase 2-2 OS=Arabidopsis thaliana OX=3702 GN=GGCT2	ChaC-like protein	-	-	-	K22596|GGCT; gamma-glutamylcyclotransferase, plant [EC:4.3.2.9]	ko00480(Metabolism);ko01100(Metabolism)
TR8182_c0_g1	274.49	115.82	1.2463	up	0.0016271	0.045721	probable LRR receptor-like serine/threonine-protein kinase At4g30520 [Camellia sinensis]	Probable LRR receptor-like serine/threonine-protein kinase At4g30520 OS=Arabidopsis thaliana OX=3702 GN=At4g30520 PE=2 SV=1	Protein kinase domain;Protein tyrosine kinase;Leucine rich repeat N-terminal domain;Leucine Rich repeats (2 copies);Leucine rich repeat	-	-	-	-	-
TR89725_c0_g1	0	8.9	-5.5944	down	0.0016266	0.045711	-	-	-	-	-	-	-	-
TR42266_c1_g1	0.31	11.75	-5.0345	down	0.0016264	0.045711	-	-	-	-	-	-	-	-
TR46980_c0_g1	9.28	0	5.7314	up	0.0016246	0.045666	triacylglycerol lipase 2-like [Camellia sinensis]	Triacylglycerol lipase 2 OS=Arabidopsis thaliana OX=3702 GN=LIP2 PE=2 SV=1	alpha/beta hydrolase fold;Serine aminopeptidase, S33	-	-	-	-	-
TR12787_c1_g1	8.81	0	5.6502	up	0.0016238	0.045649	-	-	-	-	-	-	-	-
TR6486_c0_g1	47.83	12.24	1.9624	up	0.0016228	0.045624	monofunctional riboflavin biosynthesis protein RIBA 3, chloroplastic isoform X1 [Camellia sinensis]	Monofunctional riboflavin biosynthesis protein RIBA 3, chloroplastic OS=Arabidopsis thaliana OX=3702 GN=RIBA3 PE=1 SV=1	GTP cyclohydrolase II;3,4-dihydroxy-2-butanone 4-phosphate synthase	-	-	-	K14652|ribBA; 3,4-dihydroxy 2-butanone 4-phosphate synthase / GTP cyclohydrolase II [EC:4.1.99.12 3.5.4.25]	ko00740(Metabolism);ko00790(Metabolism);ko01100(Metabolism);ko01110(Metabolism)
TR64354_c0_g1	34.95	8.3	2.0752	up	0.0016217	0.045599	tetratricopeptide repeat protein 1 [Camellia sinensis]	-	-	-	-	-	-	-
TR7834_c1_g1	84.71	191.86	-1.1814	down	0.0016213	0.045592	Disease resistance RPP13-like protein [Actinidia chinensis var. chinensis]	-	Leucine Rich repeats (2 copies)	-	-	-	-	-
TR49171_c0_g1	84.36	193.96	-1.1993	down	0.00162	0.045564	phytosulfokine receptor 2 [Camellia sinensis]	Phytosulfokine receptor 2 OS=Arabidopsis thaliana OX=3702 GN=PSKR2 PE=2 SV=1	Protein kinase domain;Protein tyrosine kinase;Leucine rich repeat;Leucine Rich repeats (2 copies);Leucine Rich Repeat;Leucine rich repeat N-terminal domain	-	-	-	-	-
TR3074_c1_g2	1839.35	847.83	1.1172	up	0.0016201	0.045564	3-oxo-Delta(4,5)-steroid 5-beta-reductase-like [Camellia sinensis]	3-oxo-Delta(4,5)-steroid 5-beta-reductase OS=Digitalis lanata OX=49450 PE=1 SV=1	-	-	-	-	-	-
TR72716_c0_g1	1.01	15.71	-3.97	down	0.0016189	0.04554	-	-	-	-	-	-	-	-
TR343_c0_g2	175.82	774.06	-2.1381	down	0.0016186	0.045537	scarecrow-like protein 21 [Camellia sinensis]	Chitin-inducible gibberellin-responsive protein 1 OS=Oryza sativa subsp. japonica OX=39947 GN=CIGR1 PE=2 SV=1	GRAS domain family	-	-	-	-	-
TR3094_c3_g1	191.53	444.11	-1.2127	down	0.0016163	0.045477	probable polygalacturonase isoform X1 [Camellia sinensis]	Probable polygalacturonase OS=Vitis vinifera OX=29760 GN=GSVIVT00026920001 PE=1 SV=1	Glycosyl hydrolases family 28;Glycosyl hydrolases family 28	-	-	-	-	-
TR2120_c0_g3	8.37	100.89	-3.5855	down	0.0016151	0.045449	uncharacterized protein LOC114276124 [Camellia sinensis]|XP_028073693.1 uncharacterized protein LOC114276124 [Camellia sinensis]	-	Senescence regulator	-	-	-	-	-
TR1334_c17_g1	0	8.93	-5.5988	down	0.0016122	0.045372	-	-	-	-	-	-	-	-
TR2282_c12_g1	0	8.78	-5.5766	down	0.0016115	0.045357	-	-	-	-	-	-	-	-
TR90661_c1_g1	0.31	12.59	-5.1349	down	0.0016085	0.045284	uncharacterized protein LOC114317192 [Camellia sinensis]	-	-	-	-	-	-	-
TR4086_c1_g1	124.79	251.65	-1.0112	down	0.001608	0.045275	MATH domain and coiled-coil domain-containing protein At3g58400-like [Camellia sinensis]	MATH domain and coiled-coil domain-containing protein At2g01790 OS=Arabidopsis thaliana OX=3702 GN=At2g01790 PE=4 SV=1	MATH domain	-	-	-	-	-
TR12798_c1_g1	0.7	16.54	-4.6088	down	0.0016073	0.045259	-	-	-	-	-	-	-	-
TR70035_c0_g2	0	8.82	-5.5834	down	0.0016063	0.045242	putative heat shock protein 80 [Acaromyces ingoldii]|PWN92945.1 putative heat shock protein 80 [Acaromyces ingoldii]	Heat shock protein 83 OS=Ipomoea nil OX=35883 GN=HSP83A PE=2 SV=1	Hsp90 protein;Histidine kinase-, DNA gyrase B-, and HSP90-like ATPase;Histidine kinase-, DNA gyrase B-, and HSP90-like ATPase	-	molecular_function;binding	-	K04079|HSP90A, htpG; molecular chaperone HtpG	ko04141(Genetic Information Processing);ko04151(Environmental Information Processing);ko04217(Cellular Processes);ko04612(Organismal Systems);ko04621(Organismal Systems);ko04626(Organismal Systems);ko04657(Organismal Systems);ko04659(Organismal Systems);ko04914(Organismal Systems);ko04915(Organismal Systems)
TR53718_c0_g1	16.9	1.62	3.4013	up	0.0016059	0.045235	inorganic pyrophosphatase TTM2-like isoform X1 [Camellia sinensis]|XP_028069225.1 inorganic pyrophosphatase TTM2-like isoform X1 [Camellia sinensis]	-	-	-	-	-	-	-
TR102235_c1_g1	14.37	0.65	4.4928	up	0.0016055	0.045229	putative disease resistance protein RGA1 [Camellia sinensis]	Disease resistance protein RGA2 OS=Solanum bulbocastanum OX=147425 GN=RGA2 PE=1 SV=1	NB-ARC domain;Poxvirus A32 protein	-	-	-	-	-
TR14390_c0_g2	0	9.07	-5.6204	down	0.0016049	0.04522	probable auxin efflux carrier component 1b [Camellia sinensis]	Auxin efflux carrier component 2 OS=Arabidopsis thaliana OX=3702 GN=PIN2 PE=1 SV=2	-	-	-	-	-	-
TR903_c3_g1	7.93	34.23	-2.1063	down	0.001605	0.04522	PREDICTED: PHD finger protein MALE MEIOCYTE DEATH 1-like [Nelumbo nucifera]	PHD finger protein MALE MEIOCYTE DEATH 1 OS=Arabidopsis thaliana OX=3702 GN=MMD1 PE=2 SV=1	-	-	-	-	-	-
TR9671_c0_g1	20.06	217.11	-3.4362	down	0.0016035	0.045195	uncharacterized protein LOC114268119 [Camellia sinensis]	-	Domain of unknown function (DUF4228)	-	-	-	-	-
TR70477_c0_g2	12.02	0.33	5.1423	up	0.0016027	0.045179	hypothetical protein D0869_01326, partial [Hortaea werneckii]	Probable inorganic phosphate transporter 1-5 OS=Arabidopsis thaliana OX=3702 GN=PHT1-5 PE=2 SV=2	Sugar (and other) transporter	-	-	-	-	-
TR10316_c0_g1	0.66	14.28	-4.4254	down	0.0016008	0.045139	UDP-glycosyltransferase 90A1-like [Camellia sinensis]	UDP-glycosyltransferase 90A1 OS=Arabidopsis thaliana OX=3702 GN=UGT90A1 PE=2 SV=1	-	-	-	-	-	-
TR104928_c0_g1	0	9.09	-5.6276	down	0.0015993	0.045102	uncharacterized protein LOC114322644 [Camellia sinensis]	-	Reverse transcriptase (RNA-dependent DNA polymerase)	-	-	-	-	-
TR19106_c0_g1	0	9.06	-5.6234	down	0.001599	0.045097	probable LRR receptor-like serine/threonine-protein kinase At3g47570 [Camellia sinensis]	-	Leucine rich repeat;Leucine Rich repeats (2 copies);Leucine Rich Repeat	-	-	-	-	-
TR20577_c0_g1	2.02	19.73	-3.2955	down	0.0015976	0.045063	probable leucine-rich repeat receptor-like serine/threonine-protein kinase At3g14840 isoform X1 [Camellia sinensis]|XP_028119967.1 probable leucine-rich repeat receptor-like serine/threonine-protein kinase At3g14840 isoform X2 [Camellia sinensis]	Probable leucine-rich repeat receptor-like serine/threonine-protein kinase At3g14840 OS=Arabidopsis thaliana OX=3702 GN=LRR-RLK PE=1 SV=1	-	-	-	-	-	-
TR46620_c0_g3	50.52	126.8	-1.3296	down	0.0015976	0.045063	maturase R (mitochondrion) [Fontanesia phillyreoides subsp. fortunei]	Nuclear intron maturase 3, mitochondrial OS=Arabidopsis thaliana OX=3702 GN=NMAT3 PE=3 SV=2	Type II intron maturase;Reverse transcriptase (RNA-dependent DNA polymerase)	metabolic process;nucleobase-containing compound metabolic process;RNA processing;cellular aromatic compound metabolic process;nitrogen compound metabolic process;biological_process;cellular process;gene expression;RNA metabolic process;mRNA metabolic process;cellular nitrogen compound metabolic process;macromolecule metabolic process;cellular metabolic process;primary metabolic process;heterocyc…	-	intracellular;cellular_component;cell;cytoplasm;intracellular membrane-bounded organelle;organelle;membrane-bounded organelle;intracellular organelle;intracellular part;cytoplasmic part;cell part;mitochondrion	-	-
TR38360_c0_g1	3652.42	20154.6	-2.4642	down	0.0015969	0.045053	-	-	-	-	-	-	-	-
TR3930_c1_g1	2.39	19.75	-3.0638	down	0.0015962	0.045039	-	-	-	-	-	-	-	-
TR7677_c2_g1	8.56	0	5.6124	up	0.0015953	0.045019	-	-	-	-	-	-	-	-
TR2285_c3_g1	163.91	59.47	1.4633	up	0.0015946	0.045005	uncharacterized protein LOC114301265 [Camellia sinensis]|XP_028081190.1 uncharacterized protein LOC114282638 [Camellia sinensis]	-	Domain of unknown function (DUF4228)	-	-	-	-	-
TR5743_c1_g1	6.92	31.88	-2.199	down	0.0015938	0.04499	hypothetical protein GlmaxMp02 (mitochondrion) [Glycine max]|YP_009532797.1 hypothetical protein (mitochondrion) [Glycine soja]|AFR34333.1 hypothetical protein GlmaxMp02 (mitochondrion) [Glycine max]|AYD72945.1 hypothetical protein (mitochondrion) [Glycine soja]	-	-	-	-	-	-	-
TR41785_c0_g1	0	9.4	-5.6749	down	0.0015917	0.044937	-	-	-	-	-	-	-	-
TR21107_c0_g1	6.64	40.96	-2.6232	down	0.0015899	0.044892	MDIS1-interacting receptor like kinase 2-like [Camellia sinensis]	MDIS1-interacting receptor like kinase 2 OS=Arabidopsis thaliana OX=3702 GN=MIK2 PE=1 SV=3	Protein kinase domain;Protein tyrosine kinase	-	-	-	-	-
TR34092_c0_g1	0	8.79	-5.5788	down	0.0015882	0.044853	DExH-box ATP-dependent RNA helicase DExH8 [Camellia sinensis]	DExH-box ATP-dependent RNA helicase DExH8 OS=Arabidopsis thaliana OX=3702 GN=At2g47680 PE=2 SV=2	-	-	-	-	-	-
TR13752_c1_g1	2.61	23.36	-3.1461	down	0.0015878	0.044847	-	-	-	-	-	-	-	-
TR160424_c0_g1	1.31	16.05	-3.5999	down	0.0015867	0.044825	Coiled-coil domain-containing protein [Actinidia chinensis var. chinensis]	-	Family of unknown function (DUF572)	-	-	-	-	-
TR96317_c2_g1	1.9	20.39	-3.387	down	0.0015868	0.044825	-	-	-	-	-	-	-	-
TR22463_c0_g1	62.09	20.82	1.5744	up	0.001586	0.044812	uncharacterized protein LOC114269533 [Camellia sinensis]	-	Plant mobile domain	-	-	-	-	-
TR9580_c0_g2	23.93	69.25	-1.5364	down	0.0015854	0.044799	-	-	-	-	-	-	-	-
TR58876_c0_g1	4.71	26.84	-2.5158	down	0.0015822	0.044721	-	-	-	-	-	-	-	-
TR31867_c0_g1	26.19	2.14	3.5928	up	0.0015824	0.044721	NAC domain-containing protein 21/22-like [Camellia sinensis]	-	-	-	-	-	-	-
TR39183_c1_g1	0	8.82	-5.5831	down	0.0015815	0.044709	-	-	-	-	-	-	-	-
TR4234_c0_g1	723.17	157.31	2.2005	up	0.0015817	0.044709	uncharacterized protein LOC114300325 [Camellia sinensis]	-	-	-	-	-	-	-
TR31653_c0_g1	0	9.02	-5.6171	down	0.0015805	0.044687	-	-	-	-	-	-	-	-
TR66122_c0_g1	0	8.81	-5.581	down	0.0015783	0.044628	phosphatidylserine decarboxylase proenzyme 3-like isoform X1 [Camellia sinensis]|XP_028105997.1 phosphatidylserine decarboxylase proenzyme 3-like isoform X1 [Camellia sinensis]	Phosphatidylserine decarboxylase proenzyme 3 OS=Arabidopsis thaliana OX=3702 GN=PSD3 PE=1 SV=1	-	-	-	-	-	-
TR68016_c1_g1	1.01	15.67	-3.9644	down	0.0015781	0.044628	-	-	-	-	-	-	-	-
TR81302_c0_g1	0	9.24	-5.6488	down	0.0015777	0.044624	protein ECERIFERUM 26-like, partial [Camellia sinensis]	-	Transferase family	-	-	-	-	-
TR5431_c0_g1	3.78	26.81	-2.842	down	0.0015755	0.044566	-	-	-	-	-	-	-	-
TR9595_c1_g1	1.63	18.01	-3.448	down	0.0015727	0.044499	-	-	-	-	-	-	-	-
TR39826_c4_g1	2.98	21.74	-2.8648	down	0.001573	0.044499	-	-	-	-	-	-	-	-
TR10153_c0_g1	41.08	8.66	2.2487	up	0.0015724	0.044499	-	-	-	-	-	-	-	-
TR38023_c0_g1	26.96	4.48	2.5965	up	0.0015725	0.044499	F-box/FBD/LRR-repeat protein At1g13570-like [Camellia sinensis]	-	-	-	-	-	-	-
TR19200_c0_g1	14.9	0.66	4.5296	up	0.0015729	0.044499	hypothetical protein VITISV_035210 [Vitis vinifera]	Retrovirus-related Pol polyprotein from transposon TNT 1-94 OS=Nicotiana tabacum OX=4097 PE=2 SV=1	GAG-pre-integrase domain	-	-	-	-	-
TR10769_c0_g1	8.71	0	5.6348	up	0.0015727	0.044499	uncharacterized protein LOC114263812 [Camellia sinensis]	-	-	-	-	-	-	-
TR8081_c1_g1	7.83	178.85	-4.5165	down	0.0015714	0.044485	-	-	-	-	-	-	-	-
TR2029_c1_g1	3.06	22.62	-2.8986	down	0.0015697	0.044442	-	-	-	-	-	-	-	-
TR156_c3_g1	0	9.21	-5.6446	down	0.0015671	0.044371	-	-	-	-	-	-	-	-
TR8252_c1_g1	8.82	0	5.6512	up	0.0015669	0.044371	uncharacterized protein LOC102612716 [Citrus sinensis]|KDO63320.1 hypothetical protein CISIN_1g034967mg [Citrus sinensis]	-	-	-	-	-	-	-
TR36401_c0_g1	0	10.16	-5.7831	down	0.0015653	0.044331	Ribosome biogenesis protein enp2 homolog [Schizosaccharomyces pombe 972h-] [Rhizoctonia solani]	Dihydroceramide fatty acyl 2-hydroxylase FAH1 OS=Arabidopsis thaliana OX=3702 GN=FAH1 PE=1 SV=1	Fatty acid hydroxylase superfamily	-	-	-	-	-
TR14263_c0_g1	0.7	14.93	-4.4651	down	0.001565	0.044331	heat shock protein 90-6, mitochondrial-like [Camellia sinensis]|XP_028099202.1 heat shock protein 90-6, mitochondrial-like [Camellia sinensis]	Heat shock protein 90-6, mitochondrial OS=Arabidopsis thaliana OX=3702 GN=HSP90-6 PE=2 SV=1	-	-	-	-	-	-
TR16604_c1_g1	1.04	15.58	-3.9407	down	0.001565	0.044331	-	-	-	-	-	-	-	-
TR11393_c0_g1	338.51	165.53	1.0318	up	0.0015653	0.044331	nicotinamidase 2-like [Camellia sinensis]	Nicotinamidase 2 OS=Arabidopsis thaliana OX=3702 GN=NIC2 PE=1 SV=1	Isochorismatase family	-	-	-	-	-
TR17343_c0_g1	358.67	174.22	1.0422	up	0.0015651	0.044331	APO protein 3, mitochondrial [Camellia sinensis]|XP_028085398.1 APO protein 3, mitochondrial [Camellia sinensis]	APO protein 3, mitochondrial OS=Arabidopsis thaliana OX=3702 GN=APO3 PE=2 SV=1	APO RNA-binding	-	-	-	-	-
TR19720_c0_g1	1.03	15.55	-3.9418	down	0.001564	0.04432	cytochrome P450 734A1-like [Camellia sinensis]	Cytochrome P450 734A1 OS=Arabidopsis thaliana OX=3702 GN=CYP734A1 PE=2 SV=1	Cytochrome P450	-	-	-	-	-
TR55534_c0_g1	20.6	74.95	-1.8581	down	0.0015636	0.044315	disease resistance protein RPS4B-like [Camellia sinensis]	-	-	-	-	-	-	-
TR2683_c1_g1	2.67	20.75	-2.9581	down	0.0015628	0.044296	-	Callose synthase 3 OS=Arabidopsis thaliana OX=3702 GN=CALS3 PE=3 SV=3	-	-	-	-	-	-
TR34309_c0_g1	1.63	17.5	-3.4083	down	0.0015605	0.044237	uncharacterized protein LOC114274758 [Camellia sinensis]	Protein FAR1-RELATED SEQUENCE 6 OS=Arabidopsis thaliana OX=3702 GN=FRS6 PE=2 SV=1	MULE transposase domain;MuDR family transposase;SWIM zinc finger	-	-	-	-	-
TR100229_c0_g1	0	8.85	-5.5878	down	0.0015602	0.044232	uncharacterized protein LOC114268002 [Camellia sinensis]	-	Neprosin activation peptide	-	-	-	-	-
TR151540_c0_g1	340.1	3373.74	-3.3104	down	0.0015596	0.04423	-	-	-	-	-	-	-	-
TR17014_c0_g1	4.23	26.83	-2.652	down	0.0015595	0.04423	probable LRR receptor-like serine/threonine-protein kinase At1g07650 isoform X4 [Camellia sinensis]	Probable LRR receptor-like serine/threonine-protein kinase RFK1 OS=Arabidopsis thaliana OX=3702 GN=RKF1 PE=1 SV=1	-	-	-	-	-	-
TR1303_c0_g1	183.37	489.18	-1.4158	down	0.0015599	0.04423	auxin-responsive protein SAUR36-like [Camellia sinensis]	Auxin-responsive protein SAUR36 OS=Arabidopsis thaliana OX=3702 GN=SAUR36 PE=2 SV=1	Auxin responsive protein	-	-	-	K14488|SAUR; SAUR family protein	ko04075(Environmental Information Processing)
TR70445_c0_g1	13.16	0.32	5.2738	up	0.0015599	0.04423	-	-	-	-	-	-	-	-
TR27057_c2_g1	8.59	0	5.6169	up	0.001559	0.044223	putative disease resistance RPP13-like protein 1 [Camellia sinensis]	-	-	-	-	-	-	-
TR28415_c0_g1	1.63	17.73	-3.4279	down	0.0015587	0.044221	-	-	-	-	-	-	-	-
TR19969_c0_g1	40.17	10.45	1.942	up	0.0015585	0.044219	-	-	-	-	-	-	-	-
TR22373_c0_g1	0	8.79	-5.5789	down	0.0015573	0.04419	-	-	-	-	-	-	-	-
TR55446_c0_g1	4.27	31.29	-2.8691	down	0.0015559	0.04416	uncharacterized protein LOC114263024 [Camellia sinensis]	-	Domain of unknown function (DUF4228)	-	-	-	-	-
TR33718_c1_g1	0.69	15.02	-4.4774	down	0.0015551	0.044143	-	-	-	-	-	-	-	-
TR28443_c1_g1	0	10.14	-5.7809	down	0.0015547	0.044136	-	-	-	-	-	-	-	-
TR34979_c0_g1	36.77	7.36	2.3244	up	0.0015545	0.044136	putative disease resistance protein At1g50180 [Camellia sinensis]	Probable disease resistance RPP8-like protein 2 OS=Arabidopsis thaliana OX=3702 GN=RPP8L2 PE=3 SV=1	Leucine Rich repeats (2 copies);Leucine rich repeat	-	-	-	-	-
TR5412_c0_g1	503.08	211.13	1.2535	up	0.0015529	0.044095	fructose-1,6-bisphosphatase, chloroplastic-like [Camellia sinensis]|AHE93344.1 fructose-1,6-bisphosphatase [Camellia sinensis]	Fructose-1,6-bisphosphatase, chloroplastic OS=Pisum sativum OX=3888 GN=FBP PE=1 SV=2	Fructose-1-6-bisphosphatase, N-terminal domain	-	-	-	K03841|FBP, fbp; fructose-1,6-bisphosphatase I [EC:3.1.3.11]	ko00010(Metabolism);ko00030(Metabolism);ko00051(Metabolism);ko00680(Metabolism);ko00710(Metabolism);ko01100(Metabolism);ko01110(Metabolism);ko01120(Metabolism);ko01200(Metabolism);ko04152(Environmental Information Processing);ko04910(Organismal Systems);ko04922(Organismal Systems)
TR33725_c0_g1	32.54	90.79	-1.4813	down	0.001552	0.044081	cytochrome P450 CYP82D47-like [Camellia sinensis]	Cytochrome P450 CYP82H23 (Fragment) OS=Panax ginseng OX=4054 PE=2 SV=1	-	-	-	-	-	-
TR23112_c0_g1	231.9	94.51	1.2964	up	0.0015522	0.044081	cysteine-rich receptor-like protein kinase 10 [Camellia sinensis]	Cysteine-rich receptor-like protein kinase 21 OS=Arabidopsis thaliana OX=3702 GN=CRK21 PE=2 SV=1	Protein kinase domain;Protein tyrosine kinase;Protein tyrosine kinase;Protein kinase domain	-	-	-	-	-
TR54194_c0_g1	0	10.22	-5.7971	down	0.0015501	0.044035	-	-	-	-	-	-	-	-
TR1190_c1_g1	126.22	51.26	1.2996	up	0.0015488	0.044002	putative pentatricopeptide repeat-containing protein At2g02150 [Camellia sinensis]	Putative pentatricopeptide repeat-containing protein At2g02150 OS=Arabidopsis thaliana OX=3702 GN=At2g02150 PE=3 SV=1	PPR repeat family;PPR repeat;PPR repeat;Pentatricopeptide repeat domain;Pentacotripeptide-repeat region of PRORP;Mitochondrial 28S ribosomal protein S27;Tetratricopeptide repeat;Region in Clathrin and VPS	-	-	-	-	-
TR7647_c2_g1	0	9.17	-5.6382	down	0.0015472	0.043963	uncharacterized protein LOC114258514 [Camellia sinensis]	-	-	-	-	-	-	-
TR2796_c3_g1	2.32	19.61	-3.0772	down	0.001543	0.043848	Histone-lysine N-methyltransferase [Actinidia chinensis var. chinensis]	-	-	-	-	-	-	-
TR13656_c0_g1	8.62	0	5.6214	up	0.0015387	0.043732	fanconi-associated nuclease 1 homolog isoform X7 [Camellia sinensis]|XP_028089637.1 fanconi-associated nuclease 1 homolog isoform X7 [Camellia sinensis]|XP_028089710.1 fanconi-associated nuclease 1 homolog isoform X7 [Camellia sinensis]|XP_028089734.1 fanconi-associated nuclease 1 homolog isoform X7 [Camellia sinensis]	-	-	-	-	-	-	-
TR36797_c0_g2	8.57	0	5.6135	up	0.0015376	0.043706	-	-	-	-	-	-	-	-
TR65869_c0_g1	8.57	0	5.6135	up	0.0015376	0.043706	-	-	-	-	-	-	-	-
TR68534_c0_g1	18.71	0	6.7384	up	0.0015366	0.043687	hypothetical protein AC578_7949 [Pseudocercospora eumusae]	-	-	-	-	-	-	-
TR58663_c0_g2	1	14.92	-3.8979	down	0.0015333	0.043604	uncharacterized protein LOC102629445 [Citrus sinensis]	-	-	-	-	-	-	-
TR50995_c0_g1	2.33	21.08	-3.1777	down	0.0015334	0.043604	receptor-like protein 12 [Camellia sinensis]	Receptor-like protein 34 OS=Arabidopsis thaliana OX=3702 GN=RLP34 PE=2 SV=1	Leucine Rich repeats (2 copies);Leucine rich repeat;Leucine Rich Repeat	-	-	-	-	-
TR2711_c0_g1	10973.2	5261.41	1.0605	up	0.001533	0.043603	calreticulin-like [Camellia sinensis]	Calreticulin OS=Ricinus communis OX=3988 PE=2 SV=1	Calreticulin family	-	-	-	K08057|CALR; calreticulin	ko04141(Genetic Information Processing);ko04145(Cellular Processes);ko04612(Organismal Systems)
TR1804_c12_g2	0	9	-5.6096	down	0.0015286	0.043489	-	-	-	-	-	-	-	-
TR54344_c0_g2	255.38	119.47	1.095	up	0.0015285	0.043489	-	-	-	-	-	-	-	-
TR55562_c0_g2	8.89	0	5.6665	up	0.0015288	0.043489	zinc finger protein [Macleaya cordata]	RanBP2-type zinc finger protein At1g67325 OS=Arabidopsis thaliana OX=3702 GN=At1g67325 PE=1 SV=1	-	-	-	-	-	-
TR32761_c0_g1	8.58	0	5.6156	up	0.001528	0.043482	glycerophosphodiester phosphodiesterase GDPDL3-like [Camellia sinensis]	Glycerophosphodiester phosphodiesterase GDPDL4 OS=Arabidopsis thaliana OX=3702 GN=GDPDL4 PE=1 SV=1	-	-	-	-	-	-
TR7931_c1_g2	8.82	0	5.6522	up	0.0015274	0.043469	uncharacterized protein LOC114278834 [Camellia sinensis]	-	-	-	-	-	-	-
TR18685_c0_g1	9.7	0	5.7904	up	0.0015272	0.043469	-	-	-	-	-	-	-	-
TR5019_c0_g1	0.66	14.51	-4.4492	down	0.0015254	0.043422	uncharacterized protein LOC114257985 [Camellia sinensis]	-	-	-	-	-	-	-
TR3810_c0_g1	162.2	348.16	-1.1021	down	0.0015241	0.043391	annexin D3 isoform X1 [Camellia sinensis]	Annexin D3 OS=Arabidopsis thaliana OX=3702 GN=ANN3 PE=2 SV=2	Annexin	-	-	-	-	-
TR68780_c0_g1	8.78	0	5.6457	up	0.0015234	0.043381	-	-	-	-	-	-	-	-
TR25791_c1_g1	1.28	17.26	-3.7198	down	0.0015229	0.043371	-	-	-	-	-	-	-	-
TR42200_c0_g1	7.67	35.78	-2.2224	down	0.0015204	0.043304	-	-	-	-	-	-	-	-
TR51590_c0_g1	1.05	50.44	-5.6153	down	0.0015199	0.043294	very-long-chain 3-oxoacyl-CoA reductase 1-like [Camellia sinensis]	-	-	-	-	-	-	-
TR35076_c0_g1	3.3	30.47	-3.2014	down	0.0015144	0.043153	-	-	-	-	-	-	-	-
TR40107_c0_g1	1.03	15.57	-3.9433	down	0.0015117	0.043082	-	-	-	-	-	-	-	-
TR187292_c0_g1	0	9.93	-5.7553	down	0.0015111	0.043068	-	-	-	-	-	-	-	-
TR38846_c0_g2	3.9	25.81	-2.7114	down	0.0015085	0.043006	-	-	-	-	-	-	-	-
TR10208_c0_g1	31.62	6.14	2.374	up	0.0015081	0.043006	eukaryotic translation initiation factor 3 subunit G-like [Camellia sinensis]	-	Eukaryotic translation initiation factor 3 subunit G;Zinc knuckle	-	-	-	-	-
TR150270_c0_g1	8.81	0	5.6545	up	0.0015085	0.043006	uncharacterized protein LOC114271259 [Camellia sinensis]	-	zinc-binding in reverse transcriptase	-	-	-	-	-
TR52863_c0_g1	8.81	0	5.6545	up	0.0015085	0.043006	-	-	-	-	-	-	-	-
TR3407_c3_g1	16.37	1.23	3.7102	up	0.0015074	0.043003	disease resistance protein RPS2-like isoform X1 [Camellia sinensis]	-	-	-	-	-	-	-
TR26551_c1_g1	0.31	12.21	-5.0917	down	0.0015056	0.042957	uncharacterized protein LOC114262255 [Camellia sinensis]	-	-	-	-	-	-	-
TR439_c2_g1	23.35	3.18	2.8803	up	0.0015016	0.042846	-	-	-	-	-	-	-	-
TR1470_c4_g1	0	8.85	-5.5875	down	0.0014994	0.042796	-	-	-	-	-	-	-	-
TR39834_c0_g1	0	8.85	-5.5875	down	0.0014994	0.042796	-	-	-	-	-	-	-	-
TR47415_c0_g1	11.62	0.33	5.09	up	0.001499	0.042792	ras-related protein RABA1d-like [Camellia sinensis]	Ras-related protein RABA1c OS=Arabidopsis thaliana OX=3702 GN=RABA1C PE=2 SV=1	-	-	-	-	-	-
TR5636_c2_g2	0.7	15.42	-4.5103	down	0.0014985	0.042783	-	-	-	-	-	-	-	-
TR3113_c1_g2	0	9.15	-5.6361	down	0.0014968	0.04274	-	-	-	-	-	-	-	-
TR187871_c0_g1	14.81	0.66	4.5217	up	0.0014948	0.042693	-	-	-	-	-	-	-	-
TR21682_c0_g2	0.34	12.59	-5.1323	down	0.0014937	0.042664	serine/threonine-protein phosphatase PP2A catalytic subunit-like [Camellia sinensis]|XP_028067674.1 serine/threonine-protein phosphatase PP2A catalytic subunit-like [Camellia sinensis]	Serine/threonine-protein phosphatase PP2A catalytic subunit OS=Hevea brasiliensis OX=3981 GN=PP2A PE=2 SV=1	-	-	-	-	-	-
TR7041_c2_g1	0.7	15.68	-4.5362	down	0.0014936	0.042664	receptor-like protein Cf-9 [Camellia sinensis]	-	Leucine Rich repeats (2 copies);Leucine rich repeat;Leucine Rich Repeat	-	-	-	-	-
TR106361_c0_g1	8.84	0	5.6553	up	0.0014937	0.042664	-	-	-	-	-	-	-	-
TR18385_c0_g1	256.99	569.43	-1.1475	down	0.0014926	0.042649	uncharacterized protein LOC114292406 [Camellia sinensis]|XP_028092161.1 uncharacterized protein LOC114292406 [Camellia sinensis]	-	-	-	-	-	-	-
TR71036_c0_g1	21.37	2.5	3.0863	up	0.0014904	0.042592	-	-	-	-	-	-	-	-
TR76502_c0_g1	9.31	0	5.7323	up	0.0014901	0.042587	uncharacterized protein LOC114288208 [Camellia sinensis]	-	-	-	-	-	-	-
TR6860_c1_g1	55.27	13.51	2.0368	up	0.0014898	0.042582	uncharacterized protein LOC114272416 [Camellia sinensis]	-	RING/Ubox like zinc-binding domain;Zinc finger, C3HC4 type (RING finger)	-	-	-	-	-
TR28636_c1_g2	0	8.92	-5.5984	down	0.0014882	0.042542	uncharacterized protein LOC114295021 [Camellia sinensis]	-	-	-	-	-	-	-
TR39592_c0_g1	0	8.92	-5.5984	down	0.0014882	0.042542	-	-	-	-	-	-	-	-
TR83927_c1_g1	8.95	0	5.6758	up	0.0014881	0.042542	cationic amino acid transporter 1-like isoform X1 [Camellia sinensis]	Cationic amino acid transporter 1 OS=Arabidopsis thaliana OX=3702 GN=CAT1 PE=1 SV=1	Amino acid permease	-	-	-	-	-
TR3827_c2_g1	132.69	55.5	1.257	up	0.0014876	0.042541	uncharacterized protein LOC114269911 [Camellia sinensis]	-	Reverse transcriptase (RNA-dependent DNA polymerase);Endonuclease/Exonuclease/phosphatase family;Domain of unknown function (DUF4283);zinc-binding in reverse transcriptase	-	-	-	-	-
TR3270_c14_g1	6.97	33.54	-2.2638	down	0.0014863	0.042511	-	-	-	-	-	-	-	-
TR3458_c0_g2	44.5	113.79	-1.3551	down	0.0014864	0.042511	protein DA1-related 1-like isoform X1 [Camellia sinensis]|XP_028120703.1 protein DA1-related 1-like isoform X1 [Camellia sinensis]|XP_028120704.1 protein DA1-related 1-like isoform X1 [Camellia sinensis]|XP_028120705.1 protein DA1-related 1-like isoform X1 [Camellia sinensis]	Triosephosphate isomerase, chloroplastic OS=Fragaria ananassa OX=3747 GN=TPI PE=2 SV=1	-	-	-	-	-	-
TR67282_c0_g1	136.78	281.68	-1.0424	down	0.0014863	0.042511	probable alpha-mannosidase At5g13980 isoform X3 [Camellia sinensis]	Probable alpha-mannosidase At5g13980 OS=Arabidopsis thaliana OX=3702 GN=At5g13980 PE=2 SV=1	Glycosyl hydrolases family 38 C-terminal domain	-	-	-	K01191|MAN2C1; alpha-mannosidase [EC:3.2.1.24]	ko00511(Metabolism)
TR49675_c0_g2	0	9.07	-5.6237	down	0.0014839	0.042454	E3 ubiquitin-protein ligase WAV3-like [Camellia sinensis]	-	-	-	-	-	-	-
TR48260_c0_g1	1.99	20.07	-3.3319	down	0.0014835	0.042447	-	-	-	-	-	-	-	-
TR14017_c1_g1	0	9.05	-5.6214	down	0.0014829	0.042435	-	-	-	-	-	-	-	-
TR13365_c0_g1	21.62	65.61	-1.6013	down	0.0014825	0.042429	uncharacterized protein LOC114317647 [Camellia sinensis]	Increased DNA methylation 1 OS=Arabidopsis thaliana OX=3702 GN=IDM1 PE=1 SV=1	TPL-binding domain in jasmonate signalling	-	-	-	-	-
TR3028_c1_g1	1452.6	2969.24	-1.0316	down	0.0014822	0.042425	methylenetetrahydrofolate reductase 2-like [Camellia sinensis]	Methylenetetrahydrofolate reductase 1 OS=Zea mays OX=4577 PE=2 SV=1	Methylenetetrahydrofolate reductase	-	-	-	K00297|metF, MTHFR; methylenetetrahydrofolate reductase (NADPH) [EC:1.5.1.20]	ko00670(Metabolism);ko00720(Metabolism);ko01100(Metabolism);ko01120(Metabolism);ko01200(Metabolism)
TR41247_c1_g1	23.01	2.6	3.1632	up	0.001481	0.042395	-	-	-	-	-	-	-	-
TR16471_c0_g1	687.53	337	1.0291	up	0.0014799	0.042369	probable galactinol--sucrose galactosyltransferase 2 isoform X1 [Camellia sinensis]|XP_028088733.1 probable galactinol--sucrose galactosyltransferase 2 isoform X1 [Camellia sinensis]|XP_028088734.1 probable galactinol--sucrose galactosyltransferase 2 isoform X1 [Camellia sinensis]|XP_028088735.1 probable galactinol--sucrose galactosyltransferase 2 isoform X1 [Camellia sinensis]|XP_028088736.1 pro…	Probable galactinol--sucrose galactosyltransferase 2 OS=Arabidopsis thaliana OX=3702 GN=RFS2 PE=2 SV=2	Raffinose synthase or seed imbibition protein Sip1	-	-	-	-	-
TR21697_c0_g1	119.51	43.82	1.4482	up	0.0014797	0.042366	high mobility group B protein 14 [Camellia sinensis]	High mobility group B protein 14 OS=Arabidopsis thaliana OX=3702 GN=HMGB14 PE=2 SV=2	-	-	-	-	-	-
TR46037_c0_g1	0.94	16.7	-4.0999	down	0.0014793	0.04236	probable disease resistance protein At1g58602 [Camellia sinensis]|XP_028064164.1 probable disease resistance protein At1g58602 [Camellia sinensis]	Probable disease resistance protein RXW24L OS=Arabidopsis thaliana OX=3702 GN=RXW24L PE=2 SV=1	NB-ARC domain	-	-	-	-	-
TR52914_c0_g1	3.96	24.42	-2.6173	down	0.0014787	0.04235	ribulose-1,5 bisphosphate carboxylase/oxygenase large subunit N-methyltransferase, chloroplastic [Camellia sinensis]	Ribulose-1,5 bisphosphate carboxylase/oxygenase large subunit N-methyltransferase, chloroplastic OS=Nicotiana tabacum OX=4097 GN=RBCMT PE=2 SV=1	Rubisco LSMT substrate-binding	-	-	-	-	-
TR15054_c0_g1	21.25	2.14	3.2897	up	0.0014766	0.042294	uncharacterized protein LOC114287601 isoform X1 [Camellia sinensis]|XP_028086801.1 uncharacterized protein LOC114287601 isoform X2 [Camellia sinensis]	-	-	-	-	-	-	-
TR9346_c0_g1	11.62	42.23	-1.8603	down	0.0014764	0.042292	TMV resistance protein like [Actinidia chinensis var. chinensis]	TMV resistance protein N OS=Nicotiana glutinosa OX=35889 GN=N PE=1 SV=1	TIR domain;TIR domain;NB-ARC domain	-	-	-	-	-
TR1483_c0_g2	70.62	346.97	-2.297	down	0.0014756	0.042273	LEAF RUST 10 DISEASE-RESISTANCE LOCUS RECEPTOR-LIKE PROTEIN KINASE-like 1.4 isoform X1 [Camellia sinensis]	LEAF RUST 10 DISEASE-RESISTANCE LOCUS RECEPTOR-LIKE PROTEIN KINASE-like 1.4 OS=Arabidopsis thaliana OX=3702 GN=LRK10L-1.4 PE=2 SV=2	Protein kinase domain;Protein tyrosine kinase;Wall-associated receptor kinase C-terminal	-	-	-	-	-
TR28832_c0_g2	9.76	0	5.8019	up	0.0014753	0.042272	probable disease resistance protein At1g58602 isoform X2 [Camellia sinensis]	Disease resistance RPP8-like protein 3 OS=Arabidopsis thaliana OX=3702 GN=RPP8L3 PE=2 SV=1	-	-	-	-	-	-
TR14894_c0_g1	1.34	19.2	-3.8486	down	0.0014747	0.042259	G-type lectin S-receptor-like serine/threonine-protein kinase At5g24080 [Camellia sinensis]	G-type lectin S-receptor-like serine/threonine-protein kinase At4g27290 OS=Arabidopsis thaliana OX=3702 GN=At4g27290 PE=3 SV=4	PAN-like domain	-	-	-	-	-
TR17514_c0_g1	26.17	4.72	2.4671	up	0.0014744	0.042253	F-box/kelch-repeat protein At3g06240-like [Camellia sinensis]	Putative F-box protein At4g09190 OS=Arabidopsis thaliana OX=3702 GN=At4g09190 PE=4 SV=1	-	-	-	-	-	-
TR59461_c0_g1	9.25	0	5.7239	up	0.0014709	0.04216	nucleolar GTP-binding protein 1-like [Camellia sinensis]|XP_028125243.1 nucleolar GTP-binding protein 1-like [Camellia sinensis]	Nucleolar GTP-binding protein 1 OS=Arabidopsis thaliana OX=3702 GN=At1g50920 PE=2 SV=1	Nucleolar GTP-binding protein 1 (NOG1);NOGCT (NUC087) domain	-	-	-	K06943|NOG1; nucleolar GTP-binding protein	ko03008(Genetic Information Processing)
TR48610_c0_g1	8.99	0	5.6811	up	0.0014704	0.04215	-	-	-	-	-	-	-	-
TR2606_c3_g1	0	9.31	-5.6626	down	0.0014694	0.042125	-	-	-	-	-	-	-	-
TR34634_c0_g1	0	8.87	-5.59	down	0.001468	0.04209	kinesin-like protein KIN-4A isoform X3 [Camellia sinensis]|XP_028102526.1 kinesin-like protein KIN-4A isoform X3 [Camellia sinensis]	Kinesin-like protein KIN-4A OS=Arabidopsis thaliana OX=3702 GN=KIN4A PE=1 SV=1	-	-	-	-	-	-
TR6471_c0_g1	59.5	150.24	-1.3362	down	0.0014674	0.042079	uncharacterized protein LOC114270342 isoform X1 [Camellia sinensis]	-	-	-	-	-	-	-
TR21933_c0_g2	14.89	155.05	-3.3821	down	0.0014658	0.042036	HSP17.5 [Camellia sinensis]	18.1 kDa class I heat shock protein OS=Pisum sativum OX=3888 GN=HSP18.1 PE=1 SV=1	Hsp20/alpha crystallin family	-	-	-	-	-
TR154325_c0_g1	0	10.13	-5.7791	down	0.0014648	0.042011	hypothetical protein RSOLAG1IB_04412 [Rhizoctonia solani AG-1 IB]	-	Polysaccharide deacetylase	-	-	-	-	-
TR11344_c0_g1	8.63	0	5.6224	up	0.0014645	0.042008	calcium-transporting ATPase 10, plasma membrane-type-like isoform X2 [Camellia sinensis]	Calcium-transporting ATPase 10, plasma membrane-type OS=Arabidopsis thaliana OX=3702 GN=ACA10 PE=1 SV=2	-	-	-	-	-	-
TR29283_c0_g2	8.63	0	5.6224	up	0.0014645	0.042008	-	-	-	-	-	-	-	-
TR1721_c0_g1	3610.64	1700.32	1.0865	up	0.0014637	0.041995	nicotinamidase 1-like [Camellia sinensis]	Nicotinamidase 1 OS=Arabidopsis thaliana OX=3702 GN=NIC1 PE=1 SV=1	Isochorismatase family	-	-	-	-	-
TR2003_c0_g1	139.61	317.97	-1.1885	down	0.0014625	0.041967	calmodulin-binding receptor-like cytoplasmic kinase 2 [Camellia sinensis]	Calmodulin-binding receptor-like cytoplasmic kinase 1 OS=Arabidopsis thaliana OX=3702 GN=CRCK1 PE=1 SV=1	Protein kinase domain;Protein tyrosine kinase	-	-	-	-	-
TR61183_c0_g1	21.75	2.56	3.093	up	0.0014619	0.041955	hypersensitive-induced response protein 1-like isoform X1 [Camellia sinensis]	Hypersensitive-induced response protein-like protein 2 OS=Oryza sativa subsp. japonica OX=39947 GN=HIRL2 PE=3 SV=1	-	-	-	-	-	-
TR10462_c0_g1	3.09	26.98	-3.1432	down	0.0014582	0.041852	protein EXORDIUM-like 2 [Camellia sinensis]	Protein EXORDIUM-like 2 OS=Arabidopsis thaliana OX=3702 GN=EXL2 PE=2 SV=1	Phosphate-induced protein 1 conserved region	-	-	-	-	-
TR138_c0_g1	410.97	2019.86	-2.2971	down	0.0014581	0.041852	amino-acid permease BAT1 homolog isoform X2 [Camellia sinensis]|AYA60124.1 amino-acid permease BAT2 [Camellia sinensis]	Amino-acid permease BAT1 homolog OS=Oryza sativa subsp. japonica OX=39947 GN=BAT1 PE=2 SV=1	Amino acid permease;Amino acid permease	-	-	-	-	-
TR198988_c0_g1	0.34	12.56	-5.1315	down	0.0014566	0.041817	hypothetical protein TSUD_391930 [Trifolium subterraneum]	-	-	-	-	-	-	-
TR6965_c1_g1	38.88	103.17	-1.4053	down	0.001455	0.041774	probable serine/threonine-protein kinase PBL19 [Camellia sinensis]	Probable serine/threonine-protein kinase PBL19 OS=Arabidopsis thaliana OX=3702 GN=PBL19 PE=1 SV=1	Protein tyrosine kinase;Protein kinase domain	-	-	-	-	-
TR65388_c0_g1	9.63	39.89	-2.0477	down	0.0014547	0.041769	-	-	-	-	-	-	-	-
TR26146_c0_g1	662.35	253.13	1.3873	up	0.0014539	0.041754	uncharacterized protein LOC114319300 isoform X1 [Camellia sinensis]	-	-	-	-	-	-	-
TR35900_c1_g1	9.94	0	5.8242	up	0.0014539	0.041754	uncharacterized protein LOC114259389 [Camellia sinensis]	-	Reverse transcriptase-like	-	-	-	-	-
TR15214_c4_g1	0	8.88	-5.5919	down	0.0014518	0.041701	-	-	-	-	-	-	-	-
TR8206_c0_g1	9.74	38.47	-1.9845	down	0.0014512	0.041691	-	-	-	-	-	-	-	-
TR1983_c0_g1	34.54	112.23	-1.702	down	0.0014513	0.041691	BES1/BZR1 homolog protein 4-like isoform X1 [Camellia sinensis]|XP_028102866.1 BES1/BZR1 homolog protein 4-like isoform X2 [Camellia sinensis]	Protein BZR1 homolog 2 OS=Oryza sativa subsp. japonica OX=39947 GN=BZR2 PE=2 SV=1	BES1/BZR1 plant transcription factor, N-terminal	-	-	-	-	-
TR9401_c0_g1	407.21	202.04	1.0118	up	0.001451	0.041691	uncharacterized protein LOC114280967 [Camellia sinensis]	-	Man1-Src1p-C-terminal domain	-	-	-	-	-
TR51066_c1_g1	20.16	2.57	2.9784	up	0.0014496	0.041657	tubulin beta chain-like [Camellia sinensis]	Tubulin beta-2 chain OS=Solanum tuberosum OX=4113 GN=TUBB2 PE=2 SV=1	Tubulin/FtsZ family, GTPase domain;Tubulin C-terminal domain	-	-	-	K07375|TUBB; tubulin beta	ko04145(Cellular Processes);ko04540(Cellular Processes)
TR2632_c1_g1	6.72	33.1	-2.3021	down	0.0014487	0.041639	GDSL esterase/lipase At1g54790-like [Camellia sinensis]	GDSL esterase/lipase At1g54790 OS=Arabidopsis thaliana OX=3702 GN=At1g54790 PE=2 SV=1	-	-	-	-	-	-
TR6887_c0_g1	0.94	16.9	-4.1181	down	0.0014462	0.041582	-	-	-	-	-	-	-	-
TR55629_c0_g1	3.35	22.21	-2.7312	down	0.0014457	0.041582	bifunctional aspartate aminotransferase and glutamate/aspartate-prephenate aminotransferase [Camellia sinensis]	Bifunctional aspartate aminotransferase and glutamate/aspartate-prephenate aminotransferase OS=Petunia hybrida OX=4102 PE=1 SV=1	-	metabolic process;biological_process;biosynthetic process	molecular_function;catalytic activity;transferase activity;transferase activity, transferring nitrogenous groups;binding;drug binding;vitamin binding;small molecule binding;ion binding;anion binding;cofactor binding;coenzyme binding;vitamin B6 binding;organic cyclic compound binding;heterocyclic compound binding;pyridoxal phosphate binding;transaminase activity	-	-	-
TR161636_c0_g1	17.47	1.26	3.7938	up	0.0014459	0.041582	rRNA-processing protein FCF1 homolog [Amborella trichopoda]	-	-	-	-	-	-	-
TR126321_c3_g1	8.65	0	5.6267	up	0.0014463	0.041582	probable disease resistance protein At4g19530 [Camellia sinensis]	-	-	-	-	-	-	-
TR56976_c0_g1	8.65	0	5.6267	up	0.0014463	0.041582	-	-	-	-	-	-	-	-
TR18905_c0_g1	61.55	18.9	1.7064	up	0.0014453	0.041576	uncharacterized protein LOC114276171 isoform X1 [Camellia sinensis]	-	C1 domain;Phorbol esters/diacylglycerol binding domain (C1 domain)	-	-	-	-	-
TR56535_c0_g2	0.34	12.23	-5.0933	down	0.0014432	0.041529	-	-	-	-	-	-	-	-
TR70036_c0_g1	0.34	12.03	-5.0682	down	0.0014433	0.041529	uncharacterized protein LOC114303175 [Camellia sinensis]	-	-	-	-	-	-	-
TR21256_c0_g1	5.03	37.68	-2.9104	down	0.0014435	0.041529	-	-	-	-	-	-	-	-
TR47238_c0_g1	9.08	0	5.6995	up	0.0014405	0.041458	PTI1-like tyrosine-protein kinase At3g15890 [Camellia sinensis]	PTI1-like tyrosine-protein kinase At3g15890 OS=Arabidopsis thaliana OX=3702 GN=At3g15890 PE=2 SV=1	Protein tyrosine kinase;Protein kinase domain	-	-	-	-	-
TR33544_c0_g1	0	8.85	-5.5877	down	0.0014377	0.041392	-	-	-	-	-	-	-	-
TR37048_c1_g2	1.7	17.94	-3.4141	down	0.0014374	0.041392	-	-	-	-	-	-	-	-
TR2438_c0_g1	16.29	1	4.0707	up	0.0014373	0.041392	-	-	-	-	-	-	-	-
TR100843_c1_g1	8.81	0	5.6555	up	0.0014377	0.041392	-	-	-	-	-	-	-	-
TR16539_c0_g1	6.42	30.83	-2.2707	down	0.001435	0.041339	homeobox-leucine zipper protein HOX32-like isoform X2 [Camellia sinensis]	Homeobox-leucine zipper protein HOX32 OS=Oryza sativa subsp. indica OX=39946 GN=HOX32 PE=2 SV=1	-	-	-	-	-	-
TR43372_c0_g1	70.29	23.46	1.5817	up	0.001435	0.041339	DUF724 domain-containing protein 2-like isoform X1 [Camellia sinensis]	DUF724 domain-containing protein 6 OS=Arabidopsis thaliana OX=3702 GN=DUF6 PE=2 SV=1	Protein of unknown function (DUF724);Agenet domain	-	-	-	-	-
TR52211_c3_g2	19.56	1.83	3.3897	up	0.0014347	0.041339	vascular-related unknown protein 1-like [Camellia sinensis]	-	-	-	-	-	-	-
TR93599_c0_g2	1.56	19.88	-3.6234	down	0.0014341	0.041328	-	-	-	-	-	-	-	-
TR1115_c2_g1	3.09	23.52	-2.9478	down	0.0014338	0.041321	-	-	-	-	-	-	-	-
TR155996_c0_g1	0	8.95	-5.603	down	0.0014334	0.041318	axial regulator YABBY 5-like isoform X1 [Camellia sinensis]	Axial regulator YABBY 5 OS=Arabidopsis thaliana OX=3702 GN=YAB5 PE=1 SV=1	-	-	-	-	-	-
TR9881_c1_g1	0	8.91	-5.5963	down	0.0014335	0.041318	-	-	-	-	-	-	-	-
TR4169_c0_g1	93.32	195.97	-1.0703	down	0.0014331	0.041316	uncharacterized protein LOC114263610 [Camellia sinensis]|XP_028059979.1 uncharacterized protein LOC114263610 [Camellia sinensis]	-	twin BRCT domain;BRCA1 C Terminus (BRCT) domain	-	-	-	-	-
TR11227_c0_g1	0	8.84	-5.5854	down	0.0014325	0.041305	-	-	-	-	-	-	-	-
TR1255_c0_g1	10.81	50.72	-2.2242	down	0.0014325	0.041305	myb-related protein 306-like [Camellia sinensis]	Myb-related protein 306 OS=Antirrhinum majus OX=4151 GN=MYB306 PE=2 SV=1	Myb-like DNA-binding domain;Myb-like DNA-binding domain;Myb-like DNA-binding domain;Myb-like DNA-binding domain	-	-	-	-	-
TR571_c19_g1	31.31	4.6	2.7491	up	0.001432	0.041305	UDP-glycosyltransferase 87A2-like [Camellia sinensis]	UDP-glycosyltransferase 87A1 OS=Arabidopsis thaliana OX=3702 GN=UGT87A1 PE=2 SV=1	-	-	-	-	-	-
TR22652_c0_g1	8.73	0	5.6376	up	0.0014323	0.041305	histone-lysine N-methyltransferase ATX2-like isoform X2 [Camellia sinensis]	Histone-lysine N-methyltransferase TRX1 OS=Oryza sativa subsp. japonica OX=39947 GN=TRX1 PE=1 SV=1	-	-	-	-	-	-
TR34719_c0_g1	8.79	0	5.6475	up	0.0014325	0.041305	26S proteasome non-ATPase regulatory subunit 8 homolog A-like [Camellia sinensis]	26S proteasome non-ATPase regulatory subunit 8 homolog A OS=Arabidopsis thaliana OX=3702 GN=RPN12A PE=1 SV=1	-	-	-	-	-	-
TR87632_c0_g2	0	8.93	-5.5987	down	0.0014313	0.041292	-	-	-	-	-	-	-	-
TR47785_c0_g2	15.2	0.92	4.015	up	0.0014295	0.041247	protein Jade-1-like [Camellia sinensis]	-	-	-	-	-	-	-
TR116207_c0_g1	0	8.86	-5.5898	down	0.0014293	0.041245	-	-	-	-	-	-	-	-
TR4514_c2_g1	2.76	22.99	-3.0793	down	0.0014289	0.04124	-	-	-	-	-	-	-	-
TR11892_c1_g1	8.83	0	5.6576	up	0.001429	0.04124	-	-	-	-	-	-	-	-
TR10443_c0_g1	203.8	95.8	1.0886	up	0.0014271	0.041197	uncharacterized protein LOC114287878 isoform X2 [Camellia sinensis]	-	-	-	-	-	-	-
TR39544_c1_g1	0	9	-5.6095	down	0.0014255	0.041153	-	-	-	-	-	-	-	-
TR60612_c0_g1	0.62	15.36	-4.5567	down	0.0014246	0.041132	-	-	-	-	-	-	-	-
TR49446_c0_g1	4.07	32.61	-3.0118	down	0.0014242	0.041127	ubiquitin-domain-containing protein [Acaromyces ingoldii]|PWN91374.1 ubiquitin-domain-containing protein [Acaromyces ingoldii]	Ubiquitin-40S ribosomal protein S27a-1 OS=Arabidopsis thaliana OX=3702 GN=RPS27AA PE=2 SV=2	Ubiquitin family;Ribosomal protein S27a;Ubiquitin-2 like Rad60 SUMO-like	-	-	-	K02977|RP-S27Ae, RPS27A, UBA80; ubiquitin-small subunit ribosomal protein S27Ae	ko03010(Genetic Information Processing);ko04120(Genetic Information Processing);ko04137(Cellular Processes)
TR31077_c0_g1	3036.87	1388.82	1.1288	up	0.0014224	0.041078	uncharacterized protein LOC114279580 [Camellia sinensis]	-	Phosphatidylinositol-specific phospholipase C, X domain	-	-	-	-	-
TR161261_c0_g1	15.26	0.63	4.5853	up	0.001421	0.041049	ion channel DMI1 isoform X2 [Camellia sinensis]	Ion channel DMI1 OS=Medicago truncatula OX=3880 GN=DMI1 PE=1 SV=1	-	-	-	-	-	-
TR189825_c0_g2	8.63	0	5.6235	up	0.0014207	0.041044	uncharacterized protein LOC114283921 [Camellia sinensis]	-	Domain of unknown function (DUF4283)	-	-	-	-	-
TR53667_c0_g1	8.63	0	5.6235	up	0.0014207	0.041044	-	-	-	-	-	-	-	-
TR2871_c0_g1	602.43	298.75	1.0118	up	0.0014194	0.041015	galactan beta-1,4-galactosyltransferase GALS2-like [Camellia sinensis]	Galactan beta-1,4-galactosyltransferase GALS3 OS=Arabidopsis thaliana OX=3702 GN=GALS3 PE=2 SV=1	Glycosyltransferase family 92;Glycosyl transferase family 2	-	-	-	-	-
TR47573_c1_g1	4.97	28.57	-2.5191	down	0.0014192	0.041013	LOW QUALITY PROTEIN: ethylene-responsive transcription factor CRF5-like [Camellia sinensis]	Ethylene-responsive transcription factor CRF4 OS=Arabidopsis thaliana OX=3702 GN=CRF4 PE=1 SV=2	AP2 domain	-	-	-	-	-
TR66199_c0_g1	85.32	228.89	-1.4236	down	0.0014189	0.04101	glutathione S-transferase F9-like [Camellia sinensis]	Glutathione S-transferase F9 OS=Arabidopsis thaliana OX=3702 GN=GSTF9 PE=1 SV=1	-	-	-	-	-	-
TR1225_c3_g1	3.05	21.9	-2.8555	down	0.0014183	0.040999	phosphatidylinositol/phosphatidylcholine transfer protein SFH3-like isoform X1 [Camellia sinensis]|XP_028098802.1 phosphatidylinositol/phosphatidylcholine transfer protein SFH3-like isoform X1 [Camellia sinensis]|XP_028098803.1 phosphatidylinositol/phosphatidylcholine transfer protein SFH3-like isoform X1 [Camellia sinensis]|XP_028098804.1 phosphatidylinositol/phosphatidylcholine transfer protein…	Phosphatidylinositol/phosphatidylcholine transfer protein SFH3 OS=Arabidopsis thaliana OX=3702 GN=SFH3 PE=2 SV=1	CRAL/TRIO domain	-	-	-	-	-
TR66589_c0_g2	12.25	0.32	5.1632	up	0.0014171	0.040967	-	-	-	-	-	-	-	-
TR3566_c0_g1	9.34	0	5.7368	up	0.0014171	0.040967	protein ABSCISIC ACID-INSENSITIVE 5 isoform X1 [Camellia sinensis]	-	-	-	-	-	-	-
TR2172_c0_g1	15.23	0.61	4.6046	up	0.0014155	0.04093	serine/threonine-protein kinase STY13-like [Camellia sinensis]	Serine/threonine-protein kinase STY17 OS=Arabidopsis thaliana OX=3702 GN=STY17 PE=1 SV=1	Protein tyrosine kinase;Protein kinase domain;Protein tyrosine kinase;Protein kinase domain	-	-	-	-	-
TR39377_c0_g1	2.06	20.03	-3.301	down	0.0014152	0.040928	transcription factor GTE8-like [Camellia sinensis]	Transcription factor GTE8 OS=Arabidopsis thaliana OX=3702 GN=GTE8 PE=2 SV=2	Bromodomain;Bromodomain extra-terminal - transcription regulation	-	-	-	-	-
TR3597_c1_g1	8.76	0	5.6423	up	0.0014129	0.040867	26S proteasome regulatory subunit 8 homolog B-like [Camellia sinensis]	-	-	-	-	-	-	-
TR25027_c0_g1	18.84	2.21	3.0899	up	0.0014121	0.040847	-	-	-	-	-	-	-	-
TR37213_c0_g1	9.08	0	5.6983	up	0.0014115	0.040834	-	-	-	-	-	-	-	-
TR1792_c1_g2	107.18	234	-1.1251	down	0.00141	0.040796	potassium transporter 11-like isoform X1 [Camellia sinensis]|XP_028055472.1 potassium transporter 11-like isoform X1 [Camellia sinensis]|XP_028055473.1 potassium transporter 11-like isoform X1 [Camellia sinensis]|XP_028055474.1 potassium transporter 11-like isoform X1 [Camellia sinensis]	Potassium transporter 11 OS=Arabidopsis thaliana OX=3702 GN=POT11 PE=2 SV=1	K+ potassium transporter	-	-	-	-	-
TR10506_c1_g2	1.97	18.41	-3.2137	down	0.0014096	0.04079	-	-	-	-	-	-	-	-
TR60914_c0_g1	56.17	129.54	-1.2061	down	0.0014095	0.04079	uncharacterized protein LOC114314610 [Camellia sinensis]	Gamma-tubulin complex component 2 OS=Arabidopsis thaliana OX=3702 GN=GCP2 PE=1 SV=1	Spc97 / Spc98 family	-	-	-	-	-
TR17775_c0_g2	17.4	59.65	-1.7735	down	0.0014078	0.04075	plasma membrane ATPase 4-like [Camellia sinensis]	ATPase 3, plasma membrane-type OS=Arabidopsis thaliana OX=3702 GN=AHA3 PE=1 SV=2	haloacid dehalogenase-like hydrolase	metabolic process;nucleobase-containing compound metabolic process;purine nucleotide metabolic process;purine nucleotide biosynthetic process;cellular aromatic compound metabolic process;nucleoside phosphate metabolic process;phosphorus metabolic process;phosphate-containing compound metabolic process;nitrogen compound metabolic process;biological_process;biosynthetic process;nucleotide metabolic…	molecular_function;binding;ion binding;cation binding;nucleotide binding;drug binding;purine nucleotide binding;adenyl nucleotide binding;ribonucleotide binding;purine ribonucleotide binding;adenyl ribonucleotide binding;purine ribonucleoside triphosphate binding;small molecule binding;anion binding;organic cyclic compound binding;carbohydrate derivative binding;nucleoside phosphate binding;heter…	cellular_component;membrane;intrinsic component of membrane;membrane part;integral component of membrane	-	-
TR110686_c0_g1	24.34	78.52	-1.686	down	0.0014079	0.04075	putative disease resistance RPP13-like protein 1 [Camellia sinensis]	Putative disease resistance RPP13-like protein 1 OS=Arabidopsis thaliana OX=3702 GN=RPPL1 PE=3 SV=1	-	-	-	-	-	-
TR32058_c1_g1	39.32	9.51	2.0457	up	0.0014073	0.040742	uncharacterized protein LOC114256707 [Camellia sinensis]	-	-	-	-	-	-	-
TR175297_c0_g2	0	8.88	-5.5921	down	0.0014048	0.040675	-	-	-	-	-	-	-	-
TR13382_c2_g1	12.2	0.33	5.158	up	0.0014048	0.040675	protein PYRICULARIA ORYZAE RESISTANCE 21-like isoform X1 [Camellia sinensis]	-	-	-	-	-	-	-
TR12573_c1_g1	0.35	12.07	-5.073	down	0.0014036	0.040648	uncharacterized protein LOC114289545 [Camellia sinensis]	-	-	-	-	-	-	-
TR28212_c0_g1	25.87	97.1	-1.9054	down	0.0014032	0.040641	LOW QUALITY PROTEIN: transcription factor bHLH78-like [Camellia sinensis]	Transcription factor bHLH62 OS=Arabidopsis thaliana OX=3702 GN=BHLH62 PE=2 SV=1	-	-	-	-	-	-
TR119338_c0_g1	6.45	31.69	-2.3055	down	0.0014025	0.040627	uncharacterized protein LOC114296426 isoform X4 [Camellia sinensis]|XP_028096528.1 uncharacterized protein LOC114296426 isoform X4 [Camellia sinensis]	-	NEMP family	-	-	-	-	-
TR2603_c1_g1	23.41	78.98	-1.7555	down	0.0014025	0.040627	nigrin b-like [Camellia sinensis]	Ribosome-inactivating protein SNAI&apos	-	-	-	-	-	-
TR984_c3_g1	8.66	0	5.628	up	0.0014021	0.040624	uncharacterized protein At2g29880-like [Camellia sinensis]	-	-	-	-	-	-	-
TR173_c0_g2	8.69	0	5.6324	up	0.0014012	0.040602	-	-	-	-	-	-	-	-
TR52050_c0_g1	9.78	0	5.8055	up	0.0014002	0.040578	uncharacterized protein LOC114261704 [Camellia sinensis]	Transcription initiation factor TFIID subunit 5 OS=Arabidopsis thaliana OX=3702 GN=TAF5 PE=1 SV=1	-	-	-	-	-	-
TR1014_c1_g1	309.67	1213.83	-1.9707	down	0.0013998	0.040571	protein PLANT CADMIUM RESISTANCE 2-like [Camellia sinensis]	Protein PLANT CADMIUM RESISTANCE 2 OS=Arabidopsis thaliana OX=3702 GN=PCR2 PE=1 SV=1	PLAC8 family	-	-	-	-	-
TR19329_c0_g1	0	8.97	-5.6051	down	0.0013987	0.040544	-	-	-	-	-	-	-	-
TR55063_c1_g1	0	8.97	-5.6051	down	0.0013987	0.040544	-	-	-	-	-	-	-	-
TR24417_c0_g1	8.76	0	5.6421	up	0.0013983	0.040543	uncharacterized protein LOC114292993 [Camellia sinensis]	-	-	-	-	-	-	-
TR3546_c0_g1	1110.91	521.34	1.0913	up	0.0013963	0.040489	protein EARLY RESPONSIVE TO DEHYDRATION 15-like [Camellia sinensis]	-	-	-	-	-	-	-
TR143347_c0_g1	0.35	12.62	-5.1376	down	0.0013957	0.040479	G-type lectin S-receptor-like serine/threonine-protein kinase At4g27290 [Camellia sinensis]	G-type lectin S-receptor-like serine/threonine-protein kinase At4g27290 OS=Arabidopsis thaliana OX=3702 GN=At4g27290 PE=3 SV=4	-	-	-	-	-	-
TR9320_c0_g1	201.12	88.03	1.1933	up	0.0013945	0.04045	transcription factor GTE7 [Camellia sinensis]	Transcription factor GTE3, chloroplastic OS=Arabidopsis thaliana OX=3702 GN=GTE3 PE=1 SV=1	-	-	-	-	-	-
TR70859_c0_g1	14.97	0.64	4.5599	up	0.0013942	0.04045	uncharacterized protein LOC114270566 [Camellia sinensis]	Putative ribonuclease H protein At1g65750 OS=Arabidopsis thaliana OX=3702 GN=At1g65750 PE=3 SV=1	Reverse transcriptase (RNA-dependent DNA polymerase);Endonuclease/Exonuclease/phosphatase family	-	-	-	-	-
TR53180_c0_g3	0.68	15.29	-4.5083	down	0.0013938	0.040445	uncharacterized protein LOC114286678 [Camellia sinensis]	-	-	-	-	-	-	-
TR135267_c0_g1	1.69	17.44	-3.3781	down	0.0013937	0.040445	-	Isoflavone reductase homolog TP7 OS=Nicotiana tabacum OX=4097 GN=TP7 PE=1 SV=1	-	-	-	-	-	-
TR3858_c0_g1	105.47	229.03	-1.1186	down	0.0013932	0.040442	putative phospholipid-transporting ATPase 9 [Camellia sinensis]	Putative phospholipid-transporting ATPase 9 OS=Arabidopsis thaliana OX=3702 GN=ALA9 PE=3 SV=1	Phospholipid-translocating P-type ATPase C-terminal;haloacid dehalogenase-like hydrolase;Cation transport ATPase (P-type)	-	-	-	-	-
TR16863_c2_g2	0	9.69	-5.7161	down	0.0013892	0.04033	-	-	-	-	-	-	-	-
TR2193_c0_g2	0.34	12.75	-5.154	down	0.0013892	0.04033	-	-	-	-	-	-	-	-
TR65787_c0_g1	9.19	0	5.7113	up	0.001388	0.040304	uncharacterized protein LOC114288882 [Camellia sinensis]	-	-	-	-	-	-	-
TR41165_c0_g1	27.72	197.52	-2.8321	down	0.0013876	0.040298	transcription factor MYB4-like [Camellia sinensis]	Transcription factor MYB15 OS=Arabidopsis thaliana OX=3702 GN=MYB15 PE=1 SV=1	Myb-like DNA-binding domain;Myb-like DNA-binding domain	-	-	-	-	-
TR25494_c0_g1	58.95	17.03	1.7886	up	0.0013849	0.040223	protein FAR1-RELATED SEQUENCE 5-like [Camellia sinensis]	Protein FAR1-RELATED SEQUENCE 12 OS=Arabidopsis thaliana OX=3702 GN=FRS12 PE=2 SV=1	MULE transposase domain;FAR1 DNA-binding domain	-	-	-	-	-
TR74462_c1_g1	8.76	0	5.6433	up	0.0013849	0.040223	hypothetical protein DVH24_025958 [Malus domestica]	-	-	-	-	-	-	-
TR46962_c0_g1	0	8.87	-5.5898	down	0.0013844	0.040216	-	-	-	-	-	-	-	-
TR2385_c0_g2	12.03	48.68	-2.0156	down	0.0013842	0.040216	zinc finger protein 4-like [Camellia sinensis]|XP_028053118.1 zinc finger protein 4-like [Camellia sinensis]|XP_028053119.1 zinc finger protein 4-like [Camellia sinensis]|XP_028053120.1 zinc finger protein 4-like [Camellia sinensis]|XP_028053121.1 zinc finger protein 4-like [Camellia sinensis]|XP_028053122.1 zinc finger protein 4-like [Camellia sinensis]	Zinc finger protein 4 OS=Arabidopsis thaliana OX=3702 GN=ZFP4 PE=2 SV=2	-	-	-	-	-	-
TR1084_c0_g1	168.73	360.22	-1.0944	down	0.0013833	0.040196	shikimate kinase, chloroplastic [Camellia sinensis]|XP_028123177.1 shikimate kinase, chloroplastic [Camellia sinensis]|XP_028123178.1 shikimate kinase, chloroplastic [Camellia sinensis]	Shikimate kinase, chloroplastic OS=Solanum lycopersicum OX=4081 GN=SK PE=1 SV=1	Shikimate kinase;AAA domain	-	-	-	K00891|aroK, aroL; shikimate kinase [EC:2.7.1.71]	ko00400(Metabolism);ko01100(Metabolism);ko01110(Metabolism);ko01230(Metabolism)
TR15590_c0_g2	0	9.08	-5.6258	down	0.001383	0.040191	-	-	-	-	-	-	-	-
TR15180_c0_g2	9.88	0	5.8152	up	0.0013799	0.040116	-	-	-	-	-	-	-	-
TR15090_c0_g1	8.55	46.94	-2.4656	down	0.0013796	0.040115	-	-	-	-	-	-	-	-
TR1770_c1_g1	8.73	0	5.6379	up	0.0013797	0.040115	-	-	-	-	-	-	-	-
TR90_c3_g2	8.9	0	5.6676	up	0.0013797	0.040115	-	-	-	-	-	-	-	-
TR52211_c0_g1	50.15	14.51	1.7876	up	0.0013766	0.040044	pathogenesis-related protein STH-2-like [Camellia sinensis]	Pathogenesis-related protein STH-2 OS=Solanum tuberosum OX=4113 GN=STH-2 PE=2 SV=1	Pathogenesis-related protein Bet v I family	-	-	-	-	-
TR10953_c0_g3	8.67	0	5.629	up	0.0013761	0.040032	uncharacterized protein LOC114282098 [Camellia sinensis]	-	-	-	-	-	-	-
TR866_c2_g1	39.73	104.68	-1.3979	down	0.0013756	0.040023	parathymosin-like [Camellia sinensis]	-	-	-	-	-	-	-
TR18882_c0_g1	12.05	0.33	5.1422	up	0.001375	0.04001	protein DETOXIFICATION 12-like isoform X1 [Camellia sinensis]	Protein DETOXIFICATION 12 OS=Arabidopsis thaliana OX=3702 GN=DTX12 PE=2 SV=1	-	-	-	-	-	-
TR27095_c1_g1	9.22	0	5.7151	up	0.001375	0.04001	uncharacterized protein LOC114274593 isoform X1 [Camellia sinensis]	-	-	-	-	-	-	-
TR4617_c0_g2	108.59	42.2	1.3649	up	0.0013746	0.040007	kinesin-like protein KIN-12B [Camellia sinensis]	Kinesin-like protein KIN-12B OS=Arabidopsis thaliana OX=3702 GN=KIN12B PE=1 SV=1	Kinesin motor domain	-	-	-	-	-
TR22590_c0_g1	25	70.89	-1.5035	down	0.0013737	0.039991	F-box/FBD/LRR-repeat protein At1g13570-like isoform X1 [Camellia sinensis]	-	FBD	-	-	-	-	-
TR23127_c0_g1	10.19	0	5.8605	up	0.0013738	0.039991	kinesin-like protein KIN-7O [Camellia sinensis]	Putative aconitate hydratase, cytoplasmic OS=Oryza sativa subsp. japonica OX=39947 GN=Os08g0191100 PE=3 SV=1	-	-	-	-	-	-
TR68987_c0_g1	1.97	19.3	-3.2801	down	0.0013729	0.039977	dynamin-related protein 3A-like protein [Cinnamomum micranthum f. kanehirae]	Dynamin-related protein 3A OS=Arabidopsis thaliana OX=3702 GN=DRP3A PE=1 SV=2	-	-	-	-	-	-
TR40679_c0_g1	8.77	0	5.6444	up	0.0013729	0.039977	histone acetyltransferase HAC1-like isoform X1 [Camellia sinensis]|XP_028123261.1 histone acetyltransferase HAC1-like isoform X1 [Camellia sinensis]	Histone acetyltransferase HAC12 OS=Arabidopsis thaliana OX=3702 GN=HAC12 PE=3 SV=2	-	-	-	-	-	-
TR16008_c0_g1	13.44	48.73	-1.8521	down	0.0013723	0.039968	probable disease resistance protein At1g58602 [Camellia sinensis]|XP_028064158.1 probable disease resistance protein At1g58602 [Camellia sinensis]	Putative disease resistance protein At1g50180 OS=Arabidopsis thaliana OX=3702 GN=At1g50180 PE=3 SV=2	NB-ARC domain;NACHT domain	-	-	-	-	-
TR5590_c1_g2	12.6	0.33	5.2101	up	0.0013719	0.039962	uncharacterized protein LOC114256329 [Camellia sinensis]	-	-	-	-	-	-	-
TR7817_c0_g1	4.95	27.42	-2.4649	down	0.0013715	0.039953	probable protein phosphatase 2C 60 [Camellia sinensis]	-	-	-	-	-	-	-
TR16853_c0_g1	8.84	0	5.6599	up	0.0013711	0.039949	-	-	-	-	-	-	-	-
TR41273_c1_g1	1.36	17.54	-3.7063	down	0.0013698	0.039914	-	-	-	-	-	-	-	-
TR13514_c0_g1	42.93	10.18	2.0795	up	0.0013674	0.039855	probable galactinol--sucrose galactosyltransferase 2 [Camellia sinensis]|AJO70148.1 raffinose synthase 2 [Camellia sinensis]	Probable galactinol--sucrose galactosyltransferase 2 OS=Arabidopsis thaliana OX=3702 GN=RFS2 PE=2 SV=2	-	-	-	-	-	-
TR12343_c0_g1	8.7	0	5.6334	up	0.0013676	0.039855	-	-	-	-	-	-	-	-
TR29183_c0_g1	8.7	0	5.6334	up	0.0013676	0.039855	-	-	-	-	-	-	-	-
TR21378_c0_g2	3.02	23.36	-2.9544	down	0.0013671	0.039854	uncharacterized protein LOC114292295 [Camellia sinensis]	-	-	-	-	-	-	-
TR21643_c0_g1	15.43	0.97	4.0092	up	0.0013666	0.039844	E3 ubiquitin-protein ligase RGLG2-like [Camellia sinensis]	E3 ubiquitin-protein ligase RGLG1 OS=Arabidopsis thaliana OX=3702 GN=RGLG1 PE=1 SV=1	-	-	-	-	-	-
TR29158_c0_g1	0	8.91	-5.5963	down	0.001366	0.039832	-	-	-	-	-	-	-	-
TR40737_c0_g1	9.84	0	5.8135	up	0.0013623	0.039727	-	-	-	-	-	-	-	-
TR22841_c0_g1	18.2	1.54	3.5369	up	0.0013614	0.039707	protein argonaute 2-like [Camellia sinensis]	Protein argonaute 2 OS=Arabidopsis thaliana OX=3702 GN=AGO2 PE=1 SV=1	Piwi domain	-	-	-	-	-
TR26125_c0_g1	9.36	0	5.7429	up	0.001361	0.039698	G-type lectin S-receptor-like serine/threonine-protein kinase At2g19130 [Camellia sinensis]	G-type lectin S-receptor-like serine/threonine-protein kinase At4g27290 OS=Arabidopsis thaliana OX=3702 GN=At4g27290 PE=3 SV=4	D-mannose binding lectin	-	-	-	-	-
TR52043_c0_g1	0.97	16.06	-4.0228	down	0.0013599	0.039671	serine/threonine-protein phosphatase 7 long form homolog [Camellia sinensis]	Serine/threonine-protein phosphatase 7 long form homolog OS=Arabidopsis thaliana OX=3702 GN=MAIL3 PE=2 SV=1	-	-	-	-	-	-
TR44126_c0_g1	46.87	121.12	-1.3681	down	0.0013599	0.039671	aspartyl protease family protein 1-like isoform X1 [Camellia sinensis]	Aspartyl protease family protein 1 OS=Arabidopsis thaliana OX=3702 GN=APF1 PE=2 SV=1	Xylanase inhibitor N-terminal;Eukaryotic aspartyl protease	-	-	-	-	-
TR716_c0_g2	2588.43	6029.77	-1.22	down	0.001359	0.039658	uncharacterized protein DDB_G0283357-like isoform X1 [Camellia sinensis]	B2 protein OS=Daucus carota OX=4039 PE=2 SV=1	Development and cell death domain	-	-	-	-	-
TR125857_c0_g1	8.71	0	5.6355	up	0.0013591	0.039658	G2/mitotic-specific cyclin-2-like isoform X2 [Camellia sinensis]	G2/mitotic-specific cyclin-1 OS=Medicago sativa subsp. varia OX=36902 PE=2 SV=1	Cyclin, N-terminal domain;Cyclin, C-terminal domain	-	-	-	-	-
TR7345_c1_g1	8.71	0	5.6355	up	0.0013591	0.039658	F-box/kelch-repeat protein At5g15710-like [Camellia sinensis]	-	-	-	-	-	-	-
TR14793_c5_g2	13.17	0.32	5.2696	up	0.0013585	0.039655	beta-galactosidase-like isoform X1 [Camellia sinensis]	Beta-galactosidase 1 OS=Arabidopsis thaliana OX=3702 GN=BGAL1 PE=2 SV=1	Galactose binding lectin domain	-	-	-	-	-
TR68097_c0_g2	1.69	17.43	-3.377	down	0.0013582	0.039651	-	-	-	-	-	-	-	-
TR8579_c0_g1	264.06	124.98	1.0794	up	0.001358	0.039651	3-oxoacyl-[acyl-carrier-protein] synthase I, chloroplastic-like [Camellia sinensis]	3-oxoacyl-[acyl-carrier-protein] synthase I, chloroplastic OS=Arabidopsis thaliana OX=3702 GN=KAS1 PE=1 SV=2	Beta-ketoacyl synthase, C-terminal domain;Beta-ketoacyl synthase, N-terminal domain	-	-	-	-	-
TR60832_c0_g1	76.65	21.54	1.8262	up	0.0013581	0.039651	secoisolariciresinol dehydrogenase-like [Camellia sinensis]	Secoisolariciresinol dehydrogenase (Fragment) OS=Podophyllum peltatum OX=35933 PE=1 SV=1	-	-	-	-	-	-
TR31489_c0_g1	0	8.89	-5.5942	down	0.0013572	0.039634	-	-	-	-	-	-	-	-
TR17780_c1_g1	0	8.92	-5.5986	down	0.0013569	0.039631	-	-	-	-	-	-	-	-
TR63940_c0_g1	335.48	167.38	1.0033	up	0.0013555	0.039597	F-box protein At5g06550 isoform X1 [Camellia sinensis]	F-box protein At5g06550 OS=Arabidopsis thaliana OX=3702 GN=At5g06550 PE=2 SV=1	Cupin-like domain;JmjC domain, hydroxylase	-	-	-	-	-
TR85829_c0_g1	17.35	0.95	4.1891	up	0.0013556	0.039597	methanol O-anthraniloyltransferase-like [Camellia sinensis]	Methanol O-anthraniloyltransferase OS=Vitis labrusca OX=103355 GN=AMAT PE=1 SV=1	Transferase family	-	-	-	-	-
TR5169_c1_g1	344.18	168.57	1.0291	up	0.0013548	0.039584	probable protein phosphatase 2C 38 isoform X1 [Camellia sinensis]|XP_028072445.1 probable protein phosphatase 2C 38 isoform X1 [Camellia sinensis]|XP_028072446.1 probable protein phosphatase 2C 38 isoform X1 [Camellia sinensis]	Probable protein phosphatase 2C 38 OS=Arabidopsis thaliana OX=3702 GN=PP2C38 PE=1 SV=1	Protein phosphatase 2C	-	-	-	-	-
TR41713_c0_g1	0.35	12.52	-5.1246	down	0.0013544	0.039577	protein argonaute 2-like [Camellia sinensis]	Protein argonaute 2 OS=Arabidopsis thaliana OX=3702 GN=AGO2 PE=1 SV=1	PAZ domain;Argonaute linker 1 domain	-	-	-	-	-
TR213344_c0_g1	173.06	52.3	1.7283	up	0.0013545	0.039577	ATP-dependent zinc metalloprotease [Actinidia chinensis var. chinensis]	ATP-dependent zinc metalloprotease FTSH, chloroplastic OS=Nicotiana tabacum OX=4097 GN=FTSH PE=2 SV=2	ATPase family associated with various cellular activities (AAA)	-	-	-	-	-
TR174431_c0_g1	8.71	0	5.6345	up	0.0013539	0.039571	histone H1-like [Camellia sinensis]	Histone H1 OS=Pisum sativum OX=3888 PE=2 SV=1	-	-	-	-	-	-
TR607_c0_g1	1875.65	513.44	1.8692	up	0.0013528	0.039542	uncharacterized protein LOC114284800 isoform X2 [Camellia sinensis]	-	Beta-L-arabinofuranosidase, GH127;Beta-L-arabinofuranosidase, GH127	-	-	-	-	-
TR7000_c1_g1	0	9.93	-5.7527	down	0.0013521	0.039527	PREDICTED: protein RALF-like 27 [Nicotiana tabacum]	-	Rapid ALkalinization Factor (RALF)	-	-	-	-	-
TR12268_c1_g1	0	8.92	-5.5986	down	0.0013495	0.039455	-	-	-	-	-	-	-	-
TR11120_c0_g1	0.7	15.46	-4.5165	down	0.0013487	0.039439	-	-	-	-	-	-	-	-
TR30807_c0_g2	40.17	10.42	1.9437	up	0.0013488	0.039439	LOW QUALITY PROTEIN: serine/threonine-protein kinase-like protein At1g28390 [Camellia sinensis]	Serine/threonine-protein kinase-like protein At1g28390 OS=Arabidopsis thaliana OX=3702 GN=At1g28390 PE=2 SV=1	Protein kinase domain;Protein tyrosine kinase	-	-	-	-	-
TR3123_c0_g2	0	8.91	-5.5964	down	0.0013484	0.039437	-	-	-	-	-	-	-	-
TR38897_c0_g1	15.1	0.61	4.5924	up	0.0013474	0.039414	binding partner of ACD11 1-like isoform X1 [Camellia sinensis]	Binding partner of ACD11 1 OS=Arabidopsis thaliana OX=3702 GN=BPA1 PE=1 SV=1	RNA recognition motif. (a.k.a. RRM, RBD, or RNP domain)	-	-	-	-	-
TR21124_c0_g1	9.56	0	5.7682	up	0.0013457	0.039371	-	-	-	-	-	-	-	-
TR69956_c0_g2	0	9.64	-5.7131	down	0.0013434	0.039315	-	-	-	-	-	-	-	-
TR25756_c0_g1	3.54	27.03	-2.9136	down	0.0013424	0.03929	G-type lectin S-receptor-like serine/threonine-protein kinase At4g27290 isoform X4 [Camellia sinensis]|XP_028086630.1 G-type lectin S-receptor-like serine/threonine-protein kinase At4g27290 isoform X4 [Camellia sinensis]|XP_028086631.1 G-type lectin S-receptor-like serine/threonine-protein kinase At4g27290 isoform X4 [Camellia sinensis]|XP_028086632.1 G-type lectin S-receptor-like serine/threonin…	G-type lectin S-receptor-like serine/threonine-protein kinase RKS1 OS=Arabidopsis thaliana OX=3702 GN=RKS1 PE=3 SV=3	Protein tyrosine kinase;Protein kinase domain	-	-	-	-	-
TR4777_c0_g1	2533.07	1238.71	1.0322	up	0.0013421	0.039284	glutathione S-transferase DHAR2-like [Camellia sinensis]|AHB11191.1 dehydroascorbate reductase [Camellia sinensis]	Glutathione S-transferase DHAR2 OS=Arabidopsis thaliana OX=3702 GN=DHAR2 PE=1 SV=1	Glutathione S-transferase, N-terminal domain;Glutathione S-transferase, N-terminal domain;Glutathione S-transferase, N-terminal domain;Glutathione S-transferase, C-terminal domain	-	-	-	K21888|DHAR; glutathione dehydrogenase/transferase [EC:1.8.5.1 2.5.1.18]	ko00053(Metabolism);ko00480(Metabolism);ko01100(Metabolism)
TR31039_c0_g1	265.49	663.59	-1.3218	down	0.0013412	0.039262	uncharacterized protein LOC114266781 [Camellia sinensis]	Heterogeneous nuclear ribonucleoprotein Q OS=Arabidopsis thaliana OX=3702 GN=LIF2 PE=1 SV=1	RNA recognition motif. (a.k.a. RRM, RBD, or RNP domain);RNA recognition motif. (a.k.a. RRM, RBD, or RNP domain)	-	-	-	-	-
TR3357_c0_g2	0.35	13.04	-5.1844	down	0.0013397	0.039223	-	-	-	-	-	-	-	-
TR7152_c0_g3	277.46	111.73	1.3113	up	0.0013388	0.039201	LOW QUALITY PROTEIN: serine carboxypeptidase-like [Camellia sinensis]	Serine carboxypeptidase-like OS=Oryza sativa subsp. japonica OX=39947 GN=CBP31 PE=2 SV=2	Serine carboxypeptidase	-	-	-	-	-
TR28003_c0_g1	0	10.35	-5.8138	down	0.0013355	0.03911	-	-	-	-	-	-	-	-
TR72357_c0_g2	2.43	22.96	-3.2661	down	0.0013346	0.039093	-	-	-	-	-	-	-	-
TR871_c0_g2	94.08	236.6	-1.3295	down	0.0013344	0.03909	-	-	-	-	-	-	-	-
TR4826_c0_g1	398.41	809.99	-1.0239	down	0.0013338	0.039078	uncharacterized protein At1g15400-like [Camellia sinensis]	MAPK kinase substrate protein At1g80180 OS=Arabidopsis thaliana OX=3702 GN=At1g80180 PE=1 SV=1	Domain of unknown function (DUF4666)	-	-	-	-	-
TR14488_c1_g1	102.81	38.46	1.4168	up	0.0013329	0.039056	uncharacterized protein LOC114258543 isoform X1 [Camellia sinensis]|XP_028054313.1 uncharacterized protein LOC114258543 isoform X1 [Camellia sinensis]	-	-	-	-	-	-	-
TR34126_c0_g1	0	9.08	-5.6258	down	0.0013319	0.039032	-	-	-	-	-	-	-	-
TR11451_c0_g1	2.98	23.12	-2.9493	down	0.0013316	0.039029	mechanosensitive ion channel protein 10-like [Camellia sinensis]	Mechanosensitive ion channel protein 10 OS=Arabidopsis thaliana OX=3702 GN=MSL10 PE=1 SV=1	Mechanosensitive ion channel	-	-	-	-	-
TR4768_c5_g1	179.14	56.03	1.6799	up	0.0013316	0.039029	heavy metal-associated isoprenylated plant protein 20-like [Camellia sinensis]	Heavy metal-associated isoprenylated plant protein 20 OS=Arabidopsis thaliana OX=3702 GN=HIPP20 PE=1 SV=1	Heavy-metal-associated domain	-	-	-	-	-
TR18447_c1_g1	0.62	16.19	-4.6319	down	0.0013312	0.039027	uncharacterized protein LOC114263339 [Camellia sinensis]	-	-	-	-	-	-	-
TR3211_c1_g1	3478.44	943.25	1.8826	up	0.0013313	0.039027	protein STRICTOSIDINE SYNTHASE-LIKE 5-like [Camellia sinensis]	Protein STRICTOSIDINE SYNTHASE-LIKE 5 OS=Arabidopsis thaliana OX=3702 GN=SSL5 PE=2 SV=1	Strictosidine synthase;SMP-30/Gluconolaconase/LRE-like region	-	-	-	-	-
TR1785_c1_g1	822.61	1743.75	-1.084	down	0.0013308	0.039022	-	-	-	-	-	-	-	-
TR54498_c0_g1	2.62	21.49	-3.0224	down	0.0013302	0.03901	Formin-2 like [Actinidia chinensis var. chinensis]	-	-	-	-	-	-	-
TR12804_c0_g1	8.98	0	5.6801	up	0.0013298	0.039007	disease resistance RPP13-like protein 4 [Camellia sinensis]	-	Leucine Rich repeats (2 copies);Leucine rich repeat;Leucine Rich Repeat	-	-	-	-	-
TR41116_c0_g1	8.98	0	5.6801	up	0.0013298	0.039007	-	-	-	-	-	-	-	-
TR78015_c0_g1	8.98	0	5.6801	up	0.0013298	0.039007	PREDICTED: uncharacterized protein LOC105972855 [Erythranthe guttata]|EYU23914.1 hypothetical protein MIMGU_mgv1a014694mg [Erythranthe guttata]	-	C2 domain	-	-	-	-	-
TR3212_c2_g1	56.03	141.03	-1.3332	down	0.0013272	0.038946	F-box protein At3g07870-like [Camellia sinensis]	F-box protein At3g07870 OS=Arabidopsis thaliana OX=3702 GN=At3g07870 PE=2 SV=1	F-box domain;F-box-like;F-box associated	-	-	-	-	-
TR4199_c1_g2	0	9.09	-5.6278	down	0.001327	0.038944	-	-	-	-	-	-	-	-
TR5384_c0_g1	632.92	310.9	1.0258	up	0.001327	0.038944	E3 ubiquitin ligase PARAQUAT TOLERANCE 3-like isoform X3 [Camellia sinensis]	-	DWNN domain;Zinc finger, C3HC4 type (RING finger);Zinc finger, C3HC4 type (RING finger)	-	-	-	-	-
TR3445_c4_g1	0.34	12.88	-5.1652	down	0.0013259	0.038919	-	-	-	-	-	-	-	-
TR69624_c1_g1	20.5	2.5	3.0252	up	0.0013256	0.038914	uncharacterized protein LOC114283395 [Camellia sinensis]	-	zinc-binding in reverse transcriptase	-	-	-	-	-
TR20920_c0_g1	6.68	31.48	-2.2374	down	0.001325	0.038908	uncharacterized protein LOC114268831 [Camellia sinensis]	-	-	-	-	-	-	-
TR2155_c0_g1	1618.29	661.13	1.2914	up	0.0013241	0.038887	uncharacterized protein LOC114312832 [Camellia sinensis]	-	-	-	-	-	-	-
TR47392_c0_g1	12.18	0.32	5.1555	up	0.0013229	0.038856	uncharacterized protein LOC114264281 [Camellia sinensis]	-	-	-	-	-	-	-
TR17531_c0_g1	36.98	109.68	-1.5671	down	0.0013224	0.038843	putative E3 ubiquitin-protein ligase LIN [Camellia sinensis]	Putative E3 ubiquitin-protein ligase LIN OS=Medicago truncatula OX=3880 GN=LIN PE=2 SV=1	U-box domain;WD domain, G-beta repeat	-	-	-	-	-
TR872_c3_g2	9.05	0	5.6907	up	0.001322	0.038838	-	-	-	-	-	-	-	-
TR945_c2_g1	4.8	71.77	-3.9083	down	0.0013218	0.038837	primary amine oxidase-like [Camellia sinensis]	Primary amine oxidase 2 OS=Arabidopsis thaliana OX=3702 GN=At1g31672 PE=3 SV=1	-	-	-	-	-	-
TR1498_c2_g1	261	120.84	1.1115	up	0.0013213	0.038826	S-adenosyl-L-methionine-dependent tRNA 4-demethylwyosine synthase [Camellia sinensis]|XP_028125912.1 S-adenosyl-L-methionine-dependent tRNA 4-demethylwyosine synthase [Camellia sinensis]|XP_028125913.1 S-adenosyl-L-methionine-dependent tRNA 4-demethylwyosine synthase [Camellia sinensis]|XP_028125914.1 S-adenosyl-L-methionine-dependent tRNA 4-demethylwyosine synthase [Camellia sinensis]|XP_0281259…	S-adenosyl-L-methionine-dependent tRNA 4-demethylwyosine synthase OS=Arabidopsis thaliana OX=3702 GN=TYW1 PE=2 SV=1	Flavodoxin	-	-	-	-	-
TR740_c1_g2	120.18	47.09	1.3536	up	0.0013187	0.038755	uncharacterized protein LOC114288721 isoform X1 [Camellia sinensis]	Protein disulfide-isomerase SCO2 OS=Arabidopsis thaliana OX=3702 GN=SCO2 PE=1 SV=1	EF hand;EF-hand domain pair;EF hand;EF-hand domain;EF-hand domain pair;Secreted protein acidic and rich in cysteine Ca binding region;Cytoskeletal-regulatory complex EF hand;EF-hand domain	-	-	-	K13448|CML; calcium-binding protein CML	ko04626(Organismal Systems)
TR63370_c0_g4	0	9.39	-5.6701	down	0.0013171	0.038712	probable disease resistance protein At5g63020 [Camellia sinensis]|XP_028118866.1 probable disease resistance protein At5g63020 [Camellia sinensis]|XP_028118867.1 probable disease resistance protein At5g63020 [Camellia sinensis]	Disease resistance protein RPS5 OS=Arabidopsis thaliana OX=3702 GN=RPS5 PE=1 SV=2	-	-	-	-	-	-
TR69260_c0_g1	0.34	12.3	-5.101	down	0.0013158	0.038679	zinc finger BED domain-containing protein DAYSLEEPER-like isoform X2 [Camellia sinensis]	-	Domain of unknown function (DUF4413)	-	-	-	-	-
TR69488_c0_g1	15.05	0.66	4.5465	up	0.0013158	0.038679	malate dehydrogenase, chloroplastic-like isoform X1 [Camellia sinensis]	-	-	-	-	-	-	-
TR11853_c0_g1	3.96	26.06	-2.7134	down	0.0013144	0.038645	Sulfate transporter 4.2 like [Actinidia chinensis var. chinensis]	Probable sulfate transporter 4.2 OS=Arabidopsis thaliana OX=3702 GN=SULTR4	-	-	-	-	-	-
TR60515_c0_g1	0	28.53	-7.275	down	0.0013134	0.038625	hypothetical protein AA0113_g11333 [Alternaria arborescens]	-	Stm1;Hyaluronan / mRNA binding family	-	-	-	-	-
TR2082_c0_g1	676.19	288.34	1.23	up	0.0013132	0.038625	myosin-2-like [Camellia sinensis]	Myosin-2 OS=Arabidopsis thaliana OX=3702 GN=VIII-2 PE=2 SV=1	Myosin head (motor domain);IQ calmodulin-binding motif	-	-	-	-	-
TR88571_c0_g1	16.15	0.66	4.651	up	0.0013129	0.03862	-	-	-	-	-	-	-	-
TR4681_c0_g1	47.25	115.24	-1.2842	down	0.0013123	0.038607	O-fucosyltransferase 27 [Camellia sinensis]	O-fucosyltransferase 27 OS=Arabidopsis thaliana OX=3702 GN=OFUT27 PE=2 SV=1	GDP-fucose protein O-fucosyltransferase	-	-	-	-	-
TR11521_c0_g1	82.64	29.17	1.5029	up	0.0013101	0.03855	LOW QUALITY PROTEIN: hydroxymethylglutaryl-CoA lyase, mitochondrial-like [Camellia sinensis]	-	Protein of unknown function (DUF1668);Kelch motif	-	-	-	-	-
TR2_c8_g1	0	9.31	-5.6595	down	0.0013098	0.038546	-	-	-	-	-	-	-	-
TR8501_c0_g1	3.08	23.63	-2.9574	down	0.001305	0.038409	-	-	-	-	-	-	-	-
TR2223_c1_g1	237.24	112.01	1.0821	up	0.0013042	0.03839	LOW QUALITY PROTEIN: chloride channel protein CLC-e [Camellia sinensis]	Chloride channel protein CLC-e OS=Arabidopsis thaliana OX=3702 GN=CLC-E PE=2 SV=2	Voltage gated chloride channel;CBS domain	-	-	-	-	-
TR6041_c1_g1	0.35	12.32	-5.1027	down	0.0013034	0.038373	-	-	-	-	-	-	-	-
TR12101_c0_g2	58.42	13.44	2.1225	up	0.0013023	0.038344	putative wall-associated receptor kinase-like 16 [Camellia sinensis]	-	-	-	-	-	-	-
TR69079_c1_g1	0	9.23	-5.6468	down	0.0013017	0.038331	-	-	-	-	-	-	-	-
TR2798_c1_g1	4.15	29.5	-2.8079	down	0.0013012	0.038326	putative calcium-transporting ATPase 13, plasma membrane-type [Camellia sinensis]	Putative calcium-transporting ATPase 13, plasma membrane-type OS=Arabidopsis thaliana OX=3702 GN=ACA13 PE=3 SV=1	E1-E2 ATPase	-	-	-	-	-
TR5301_c0_g1	249.21	576.24	-1.2098	down	0.0013013	0.038326	vestitone reductase-like [Camellia sinensis]	Vestitone reductase OS=Medicago sativa OX=3879 PE=1 SV=1	-	-	-	-	-	-
TR4928_c0_g1	6144.49	2740.19	1.1651	up	0.001301	0.038326	protein EXORDIUM-like 2 [Camellia sinensis]	Protein EXORDIUM-like 2 OS=Arabidopsis thaliana OX=3702 GN=EXL2 PE=2 SV=1	Phosphate-induced protein 1 conserved region	-	-	-	-	-
TR85826_c0_g1	18.29	1.59	3.5245	up	0.0013011	0.038326	uncharacterized protein LOC101258309 [Solanum lycopersicum]	-	-	-	-	-	-	-
TR6615_c0_g1	15.76	0.66	4.614	up	0.0013014	0.038326	callose synthase 12-like [Camellia sinensis]	Callose synthase 12 OS=Arabidopsis thaliana OX=3702 GN=CALS12 PE=2 SV=1	1,3-beta-glucan synthase component	-	-	-	-	-
TR68912_c1_g1	15.76	0.66	4.614	up	0.0013014	0.038326	reverse transcriptase family protein [Clostridia bacterium k32]	-	-	-	-	-	-	-
TR645_c2_g1	9.87	0	5.8143	up	0.0013	0.038311	-	-	-	-	-	-	-	-
TR556_c0_g1	32.26	94.54	-1.5508	down	0.0012991	0.03829	GDSL esterase/lipase At5g14450-like isoform X1 [Camellia sinensis]	GDSL esterase/lipase At5g14450 OS=Arabidopsis thaliana OX=3702 GN=At5g14450 PE=2 SV=1	-	-	-	-	-	-
TR18033_c0_g1	0.31	12.51	-5.1229	down	0.0012949	0.038171	uncharacterized protein LOC114315944 [Camellia sinensis]	-	-	-	-	-	-	-
TR3449_c1_g1	5.79	33.52	-2.5163	down	0.0012946	0.038167	pleiotropic drug resistance protein 3-like, partial [Camellia sinensis]	Pleiotropic drug resistance protein 3 OS=Nicotiana tabacum OX=4097 GN=PDR3 PE=2 SV=1	-	-	-	-	-	-
TR41042_c1_g1	0.35	12.3	-5.1011	down	0.0012924	0.038112	-	-	-	-	-	-	-	-
TR59521_c0_g1	2.4	24.32	-3.3584	down	0.0012924	0.038112	-	-	-	-	-	-	-	-
TR174066_c1_g1	9.61	0	5.7749	up	0.0012914	0.03809	-	-	-	-	-	-	-	-
TR62883_c0_g1	14.96	0.63	4.5588	up	0.0012903	0.038063	-	-	-	-	-	-	-	-
TR29715_c2_g1	0	9.89	-5.7467	down	0.0012881	0.038001	-	-	-	-	-	-	-	-
TR18837_c1_g1	0	9.09	-5.6279	down	0.0012876	0.037992	-	-	-	-	-	-	-	-
TR7970_c0_g2	0	9.09	-5.6279	down	0.0012876	0.037992	-	-	-	-	-	-	-	-
TR48000_c0_g2	16.31	0.61	4.708	up	0.0012872	0.037989	uncharacterized protein LOC114297823 [Camellia sinensis]	-	-	-	-	-	-	-
TR10343_c0_g1	37.88	103.89	-1.4518	down	0.001286	0.037959	glutamate receptor 3.2-like isoform X2 [Camellia sinensis]	Glutamate receptor 3.1 OS=Arabidopsis thaliana OX=3702 GN=GLR3.1 PE=2 SV=3	Ligand-gated ion channel	-	-	-	-	-
TR50610_c1_g2	0	9.36	-5.6659	down	0.0012858	0.037957	calcineurin B-like protein 3 isoform X5 [Camellia sinensis]	Calcineurin B-like protein 3 OS=Oryza sativa subsp. japonica OX=39947 GN=CBL3 PE=1 SV=1	-	-	-	-	-	-
TR2442_c1_g1	0.31	12.54	-5.1301	down	0.0012856	0.037955	-	-	-	-	-	-	-	-
TR36160_c0_g2	0	9.6	-5.707	down	0.0012849	0.037938	-	-	-	-	-	-	-	-
TR43198_c0_g1	1.66	18.18	-3.4513	down	0.0012849	0.037938	phospholipase A1-Igamma2, chloroplastic-like [Camellia sinensis]	Phospholipase A1-Igamma2, chloroplastic OS=Arabidopsis thaliana OX=3702 GN=At2g30550 PE=1 SV=2	Lipase (class 3)	-	-	-	-	-
TR52630_c0_g1	10.21	0	5.8634	up	0.0012845	0.037936	-	-	-	-	-	-	-	-
TR17064_c0_g1	48.95	14.18	1.7852	up	0.0012836	0.037913	LOW QUALITY PROTEIN: pentatricopeptide repeat-containing protein At4g32430, mitochondrial-like [Camellia sinensis]	Pentatricopeptide repeat-containing protein At4g32430, mitochondrial OS=Arabidopsis thaliana OX=3702 GN=PCMP-E40 PE=2 SV=1	PPR repeat family;PPR repeat;PPR repeat;Pentatricopeptide repeat domain;Pentacotripeptide-repeat region of PRORP	-	-	-	-	-
TR62322_c1_g1	0.62	15.59	-4.5762	down	0.0012792	0.037788	uncharacterized protein LOC114323899 [Camellia sinensis]	-	-	-	-	-	-	-
TR3630_c1_g1	75.34	26.13	1.5253	up	0.0012773	0.037736	-	-	-	-	-	-	-	-
TR52358_c0_g1	12.04	0.3	5.1405	up	0.001277	0.037733	-	-	-	-	-	-	-	-
TR35245_c1_g1	0.34	12.32	-5.1027	down	0.0012765	0.037722	NADH--cytochrome b5 reductase 1-like [Olea europaea var. sylvestris]|XP_022899594.1 NADH--cytochrome b5 reductase 1-like [Olea europaea var. sylvestris]	NADH--cytochrome b5 reductase 1 OS=Arabidopsis thaliana OX=3702 GN=CBR1 PE=1 SV=1	-	-	-	-	-	-
TR32_c2_g2	234.6	114.88	1.0303	up	0.0012757	0.037705	-	-	-	-	-	-	-	-
TR81237_c0_g2	9.2	0	5.7165	up	0.0012758	0.037705	-	-	-	-	-	-	-	-
TR109725_c1_g1	0.65	15.06	-4.5075	down	0.0012751	0.037693	-	-	-	-	-	-	-	-
TR361_c0_g1	624.72	275.36	1.1819	up	0.0012744	0.037677	uncharacterized protein LOC114293751 [Camellia sinensis]	-	-	-	-	-	-	-
TR27309_c0_g1	12.04	0.32	5.1405	up	0.0012739	0.037667	von Willebrand factor A domain-containing protein 5A-like isoform X1 [Camellia sinensis]	-	-	-	-	-	-	-
TR4136_c2_g1	75.85	22.35	1.7618	up	0.0012716	0.037604	uncharacterized protein LOC114266778 [Camellia sinensis]	-	-	-	-	-	-	-
TR28154_c0_g1	0	9.63	-5.7111	down	0.0012697	0.037551	uncharacterized protein LOC114293482 [Camellia sinensis]	-	-	-	-	-	-	-
TR18356_c0_g1	9.32	0	5.7333	up	0.0012677	0.037499	-	-	-	-	-	-	-	-
TR63565_c0_g1	12.6	0.3	5.2046	up	0.0012674	0.037492	-	-	-	-	-	-	-	-
TR26706_c1_g1	4.69	27.56	-2.5594	down	0.0012672	0.03749	agamous-like MADS-box protein AGL80 [Camellia sinensis]	Agamous-like MADS-box protein AGL80 OS=Arabidopsis thaliana OX=3702 GN=AGL80 PE=1 SV=1	SRF-type transcription factor (DNA-binding and dimerisation domain)	-	-	-	-	-
TR123102_c1_g3	7.39	37.86	-2.3612	down	0.0012669	0.037487	-	-	-	-	-	-	-	-
TR66017_c0_g1	4.97	31.31	-2.6528	down	0.0012666	0.037485	non-functional pseudokinase ZED1-like [Camellia sinensis]	Non-functional pseudokinase ZED1 OS=Arabidopsis thaliana OX=3702 GN=ZED1 PE=1 SV=1	Protein tyrosine kinase;Protein kinase domain	-	-	-	-	-
TR75155_c0_g1	8.94	0	5.6738	up	0.0012667	0.037485	-	-	-	-	-	-	-	-
TR55858_c1_g1	9.12	0	5.7049	up	0.0012666	0.037485	organic cation/carnitine transporter 4 [Camellia sinensis]	Organic cation/carnitine transporter 4 OS=Arabidopsis thaliana OX=3702 GN=OCT4 PE=2 SV=1	-	-	-	-	-	-
TR31532_c1_g1	12.04	0.3	5.1404	up	0.001263	0.03739	uncharacterized protein LOC114265240 [Camellia sinensis]	-	-	-	-	-	-	-
TR18839_c6_g1	4.18	32.22	-2.9311	down	0.0012618	0.037358	-	-	-	-	-	-	-	-
TR35430_c0_g1	9.94	45.22	-2.1826	down	0.0012615	0.037353	GDSL esterase/lipase At1g54790-like [Camellia sinensis]	GDSL esterase/lipase At1g54790 OS=Arabidopsis thaliana OX=3702 GN=At1g54790 PE=2 SV=1	-	-	-	-	-	-
TR30969_c0_g1	9.12	0	5.7003	up	0.001261	0.037344	-	-	-	-	-	-	-	-
TR3868_c11_g1	9.12	0	5.7003	up	0.001261	0.037344	-	-	-	-	-	-	-	-
TR12786_c0_g1	0	9.63	-5.7079	down	0.0012588	0.037288	-	-	-	-	-	-	-	-
TR122271_c0_g1	0.35	12.33	-5.1042	down	0.0012575	0.037262	uncharacterized protein LOC114258334 isoform X1 [Camellia sinensis]	-	Protein of unknown function (DUF1664)	-	-	-	-	-
TR10841_c1_g1	205.05	82.73	1.3105	up	0.0012574	0.037262	uncharacterized protein LOC114276278 [Camellia sinensis]	-	-	-	-	-	-	-
TR18203_c1_g1	0	9.51	-5.6914	down	0.0012562	0.037236	-	-	-	-	-	-	-	-
TR31504_c0_g1	0	9.3	-5.6576	down	0.0012563	0.037236	uncharacterized protein LOC114302369 [Camellia sinensis]	-	-	-	-	-	-	-
TR11612_c0_g1	104.51	35.31	1.566	up	0.0012563	0.037236	cellulose synthase-like protein H1 isoform X1 [Camellia sinensis]	Cellulose synthase-like protein H2 OS=Oryza sativa subsp. japonica OX=39947 GN=CSLH2 PE=3 SV=3	Cellulose synthase	-	-	-	-	-
TR10287_c0_g1	0.31	12.4	-5.112	down	0.001254	0.037188	CBL-interacting protein kinase 23-like isoform X1 [Camellia sinensis]	-	-	-	-	-	-	-
TR114498_c0_g1	0.94	16.99	-4.1241	down	0.001254	0.037188	-	-	-	-	-	-	-	-
TR1604_c1_g1	2.03	19.53	-3.2745	down	0.0012541	0.037188	transcription factor MYB5e [Camellia sinensis]	Anthocyanin regulatory C1 protein OS=Zea mays OX=4577 GN=C1 PE=2 SV=1	Myb-like DNA-binding domain;Myb-like DNA-binding domain	-	-	-	-	-
TR15928_c2_g1	33.5	100.98	-1.5945	down	0.0012539	0.037188	probable E3 ubiquitin-protein ligase XERICO [Camellia sinensis]	E3 ubiquitin-protein ligase RHA2B OS=Arabidopsis thaliana OX=3702 GN=RHA2B PE=1 SV=2	Ring finger domain;RING-like zinc finger;Zinc finger, C3HC4 type (RING finger);RING-H2 zinc finger domain;Zinc finger, C3HC4 type (RING finger)	-	-	-	-	-
TR15462_c1_g1	8.89	0	5.6664	up	0.0012537	0.037188	cation/H(+) antiporter 15-like [Camellia sinensis]	-	-	-	-	-	-	-
TR58480_c0_g1	0.62	15.48	-4.566	down	0.0012506	0.037105	-	-	-	-	-	-	-	-
TR6803_c4_g1	29.06	84.41	-1.5361	down	0.0012496	0.037081	-	-	-	-	-	-	-	-
TR12508_c1_g1	129.97	53.65	1.2766	up	0.0012475	0.037021	B-box domain protein [Actinidia chinensis var. chinensis]	B-box domain protein 30 OS=Arabidopsis thaliana OX=3702 GN=MIP1A PE=1 SV=1	B-box zinc finger	-	-	-	-	-
TR61424_c0_g1	0.69	15.43	-4.5187	down	0.0012472	0.037018	-	-	-	-	-	-	-	-
TR32024_c1_g1	1.34	17.53	-3.7146	down	0.0012471	0.037018	stearoyl-[acyl-carrier-protein] 9-desaturase, chloroplastic-like isoform X2 [Camellia sinensis]	Stearoyl-[acyl-carrier-protein] 9-desaturase, chloroplastic OS=Ricinus communis OX=3988 PE=1 SV=1	-	-	-	-	-	-
TR5459_c0_g1	0	9.21	-5.6447	down	0.0012462	0.036999	probable leucine-rich repeat receptor-like serine/threonine-protein kinase At3g14840 isoform X1 [Camellia sinensis]	-	-	-	-	-	-	-
TR53540_c0_g4	163.44	71.64	1.1908	up	0.0012463	0.036999	jasmonoyl--L-amino acid synthetase JAR4-like [Camellia sinensis]|XP_028096857.1 jasmonoyl--L-amino acid synthetase JAR4-like [Camellia sinensis]|XP_028096858.1 jasmonoyl--L-amino acid synthetase JAR4-like [Camellia sinensis]|XP_028096859.1 jasmonoyl--L-amino acid synthetase JAR4-like [Camellia sinensis]|XP_028096860.1 jasmonoyl--L-amino acid synthetase JAR4-like [Camellia sinensis]	Jasmonic acid-amido synthetase JAR1 OS=Oryza sativa subsp. japonica OX=39947 GN=GH3.5 PE=2 SV=1	-	-	-	-	-	-
TR39390_c0_g1	9.67	0	5.7905	up	0.0012459	0.036996	-	-	-	-	-	-	-	-
TR8095_c1_g1	0.35	12.49	-5.1214	down	0.0012455	0.036988	-	-	-	-	-	-	-	-
TR4306_c0_g1	2.43	24.82	-3.3762	down	0.0012453	0.036988	-	-	-	-	-	-	-	-
TR20247_c2_g1	3.42	65.79	-4.2726	down	0.0012427	0.03692	-	-	-	-	-	-	-	-
TR21484_c2_g1	0	9.54	-5.6955	down	0.0012414	0.036885	-	-	-	-	-	-	-	-
TR645_c1_g1	121.28	47.27	1.3607	up	0.0012399	0.036845	pentatricopeptide repeat-containing protein At2g15690, mitochondrial-like [Camellia sinensis]	Pentatricopeptide repeat-containing protein At2g15690, mitochondrial OS=Arabidopsis thaliana OX=3702 GN=PCMP-H66 PE=1 SV=2	DYW family of nucleic acid deaminases;PPR repeat;PPR repeat family;PPR repeat	-	-	-	-	-
TR29601_c0_g1	14.55	0.65	4.51	up	0.0012396	0.03684	uncharacterized protein LOC114290466 isoform X1 [Camellia sinensis]	Succinate-semialdehyde dehydrogenase, mitochondrial OS=Arabidopsis thaliana OX=3702 GN=ALDH5F1 PE=1 SV=2	-	-	-	-	-	-
TR16107_c0_g1	7.75	220.71	-4.8291	down	0.0012393	0.036835	receptor-like protein 14 [Camellia sinensis]	Receptor-like protein 1 OS=Arabidopsis thaliana OX=3702 GN=RLP1 PE=2 SV=2	Leucine rich repeat;Leucine Rich repeats (2 copies);Leucine Rich Repeat;Leucine Rich repeat	-	-	-	-	-
TR3105_c4_g1	40.28	8.45	2.2619	up	0.0012393	0.036835	BTB/POZ domain-containing protein At3g50780-like [Camellia sinensis]	BTB/POZ domain-containing protein At3g50780 OS=Arabidopsis thaliana OX=3702 GN=At3g50780 PE=2 SV=1	-	-	-	-	-	-
TR37522_c0_g1	0	9.12	-5.6321	down	0.0012381	0.03681	uncharacterized protein LOC114316491 [Camellia sinensis]	-	-	-	-	-	-	-
TR5321_c3_g1	0	9.12	-5.6321	down	0.0012381	0.03681	-	-	-	-	-	-	-	-
TR266_c0_g1	1716.6	857.88	1.0007	up	0.0012366	0.036778	AAA-ATPase At2g46620-like [Camellia sinensis]	AAA-ATPase At2g46620 OS=Arabidopsis thaliana OX=3702 GN=At2g46620 PE=2 SV=1	ATPase family associated with various cellular activities (AAA);Domain associated at C-terminal with AAA	-	-	-	-	-
TR10785_c0_g1	34.73	0.97	5.1758	up	0.0012366	0.036778	-	-	-	-	-	-	-	-
TR5514_c2_g1	4.82	31.11	-2.6729	down	0.0012362	0.036773	-	-	-	-	-	-	-	-
TR5935_c2_g1	0.97	16.36	-4.0518	down	0.0012351	0.036745	-	-	-	-	-	-	-	-
TR46655_c0_g2	79.07	27.58	1.5187	up	0.0012342	0.036729	hypothetical protein Ccrd_002160 [Cynara cardunculus var. scolymus]	-	-	-	-	-	-	-
TR28600_c1_g1	19.86	2.25	3.1509	up	0.0012342	0.036729	-	-	-	-	-	-	-	-
TR134_c2_g1	0	28.76	-7.2876	down	0.0012333	0.036709	-	-	-	-	-	-	-	-
TR11226_c1_g1	4.55	28.52	-2.6338	down	0.0012332	0.036709	protein SODIUM POTASSIUM ROOT DEFECTIVE 2 [Camellia sinensis]	-	-	-	-	-	-	-
TR23234_c0_g2	15.6	0.92	4.0511	up	0.0012326	0.036699	-	-	-	-	-	-	-	-
TR4530_c0_g1	9.56	0	5.772	up	0.0012326	0.036699	uncharacterized protein LOC114278044 [Camellia sinensis]	-	-	-	-	-	-	-
TR30468_c0_g1	43.11	113.45	-1.3962	down	0.0012315	0.036672	uncharacterized protein LOC114323775 isoform X2 [Camellia sinensis]	-	YacP-like NYN domain	-	-	-	-	-
TR75189_c0_g1	0	9.36	-5.666	down	0.0012311	0.036667	-	-	-	-	-	-	-	-
TR77941_c0_g2	0	10.16	-5.7894	down	0.0012303	0.036646	-	-	-	-	-	-	-	-
TR40943_c1_g1	9.18	0	5.7088	up	0.0012301	0.036644	-	-	-	-	-	-	-	-
TR143081_c0_g1	15.64	0.62	4.6339	up	0.0012295	0.036631	-	-	-	-	-	-	-	-
TR6199_c1_g1	8.91	0	5.6697	up	0.0012289	0.036618	-	-	-	-	-	-	-	-
TR10566_c1_g1	9.02	46.94	-2.3674	down	0.0012284	0.036608	WRKY transcription factor WRKY24-like [Camellia sinensis]	WRKY transcription factor WRKY24 OS=Oryza sativa subsp. indica OX=39946 GN=WRKY24 PE=2 SV=1	-	-	-	-	-	-
TR14305_c0_g1	19.71	62.26	-1.6595	down	0.0012282	0.036605	PREDICTED: truncated FRIGIDA-like protein 1 [Raphanus sativus]	FRIGIDA-like protein 1 OS=Arabidopsis thaliana OX=3702 GN=FRL1 PE=1 SV=1	-	-	-	-	-	-
TR20429_c0_g1	18.09	0.91	4.2752	up	0.0012271	0.036578	-	-	-	-	-	-	-	-
TR2203_c1_g1	281.31	137.4	1.0341	up	0.0012269	0.036576	protein HLB1 isoform X2 [Camellia sinensis]	Protein HLB1 OS=Arabidopsis thaliana OX=3702 GN=HLB1 PE=1 SV=1	-	-	-	-	-	-
TR1886_c12_g1	22.67	71.63	-1.6551	down	0.0012256	0.03654	hyoscyamine 6-dioxygenase-like [Camellia sinensis]	-	-	-	-	-	-	-
TR282_c8_g1	53.94	1.94	4.8071	up	0.0012255	0.03654	uncharacterized protein LOC114305848 [Camellia sinensis]	-	Neprosin;Neprosin activation peptide	-	-	-	-	-
TR7876_c0_g1	15.06	0.61	4.5882	up	0.0012251	0.036535	uncharacterized protein LOC114313781 [Camellia sinensis]	-	-	-	-	-	-	-
TR77801_c0_g1	0.34	15.88	-5.4714	down	0.0012247	0.036526	F-box protein PP2-B15-like isoform X1 [Camellia sinensis]	F-box protein PP2-B10 OS=Arabidopsis thaliana OX=3702 GN=PP2B10 PE=1 SV=1	Phloem protein 2	-	-	-	-	-
TR28917_c0_g1	25.22	4.1	2.616	up	0.0012224	0.036464	probable protein phosphatase 2C 35 [Camellia sinensis]	Probable protein phosphatase 2C 35 OS=Arabidopsis thaliana OX=3702 GN=At3g06270 PE=2 SV=1	Protein phosphatase 2C	-	-	-	-	-
TR23440_c0_g1	9.18	0	5.709	up	0.0012219	0.036452	pyrophosphate--fructose 6-phosphate 1-phosphotransferase subunit beta-like isoform X1 [Camellia sinensis]|XP_028073227.1 pyrophosphate--fructose 6-phosphate 1-phosphotransferase subunit beta-like isoform X2 [Camellia sinensis]	Pyrophosphate--fructose 6-phosphate 1-phosphotransferase subunit beta OS=Solanum tuberosum OX=4113 GN=PFP-BETA PE=1 SV=3	-	-	-	-	-	-
TR34261_c0_g1	9.41	0	5.7461	up	0.0012212	0.036436	keratin, type I cytoskeletal 10-like [Camellia sinensis]	-	-	-	-	-	-	-
TR6470_c0_g1	28.74	97.49	-1.7632	down	0.0012208	0.036427	cytochrome b5 [Camellia sinensis var. sinensis]	Cytochrome b5 OS=Borago officinalis OX=13363 PE=2 SV=1	Cytochrome b5-like Heme/Steroid binding domain	-	-	-	-	-
TR44730_c1_g1	4.65	29.85	-2.6817	down	0.0012203	0.036418	PREDICTED: probable WRKY transcription factor 53 [Nicotiana tomentosiformis]|XP_018629757.1 PREDICTED: probable WRKY transcription factor 53 [Nicotiana tomentosiformis]	Probable WRKY transcription factor 53 OS=Arabidopsis thaliana OX=3702 GN=WRKY53 PE=1 SV=1	-	-	-	-	-	-
TR2781_c0_g1	309.79	622.59	-1.0066	down	0.0012198	0.036408	cysteine-rich receptor-like protein kinase 10 [Camellia sinensis]	G-type lectin S-receptor-like serine/threonine-protein kinase SD1-1 OS=Arabidopsis thaliana OX=3702 GN=SD11 PE=1 SV=1	Glycosyl hydrolases family 18;Protein tyrosine kinase;Protein kinase domain;Domain of unknown function (DUF3403);Protein tyrosine kinase	-	-	-	-	-
TR46011_c0_g1	1.28	18.95	-3.8569	down	0.0012188	0.036381	-	-	-	-	-	-	-	-
TR40294_c0_g1	51.29	14.58	1.8142	up	0.0012185	0.036377	pentatricopeptide repeat-containing protein At5g66520-like [Camellia sinensis]|XP_028083775.1 pentatricopeptide repeat-containing protein At5g66520-like [Camellia sinensis]|XP_028083776.1 pentatricopeptide repeat-containing protein At5g66520-like [Camellia sinensis]	Pentatricopeptide repeat-containing protein At1g09220, mitochondrial OS=Arabidopsis thaliana OX=3702 GN=PCMP-E25 PE=2 SV=1	PPR repeat;PPR repeat family;PPR repeat;Pentatricopeptide repeat domain;Pentacotripeptide-repeat region of PRORP	-	-	-	-	-
TR29058_c0_g1	9.06	0	5.6912	up	0.0012183	0.036375	purple acid phosphatase 2-like [Camellia sinensis]	Purple acid phosphatase OS=Glycine max OX=3847 GN=PAP PE=1 SV=2	-	-	-	-	-	-
TR15206_c0_g2	0	9.3	-5.6574	down	0.0012173	0.03635	uncharacterized protein LOC114277792 [Camellia sinensis]	-	-	-	-	-	-	-
TR255_c2_g1	231.66	97.15	1.2541	up	0.0012159	0.036312	LOW QUALITY PROTEIN: uncharacterized protein LOC112031654 [Quercus suber]	Cytochrome P450 98A1 OS=Sorghum bicolor OX=4558 GN=CYP98A1 PE=2 SV=1	Integrase core domain;Cytochrome P450	-	-	-	-	-
TR45264_c0_g1	14.86	0.62	4.5605	up	0.0012157	0.03631	uncharacterized protein LOC114260887 isoform X1 [Camellia sinensis]	-	Neprosin	-	-	-	-	-
TR13424_c1_g1	253.27	120.64	1.0698	up	0.0012152	0.036301	U6 snRNA-associated Sm-like protein LSm8 [Salvia splendens]	Sm-like protein LSM8 OS=Arabidopsis thaliana OX=3702 GN=LSM8 PE=1 SV=1	-	-	-	-	K12627|LSM8; U6 snRNA-associated Sm-like protein LSm8	ko03018(Genetic Information Processing);ko03040(Genetic Information Processing)
TR4532_c0_g1	0	9.12	-5.6322	down	0.001214	0.036269	-	-	-	-	-	-	-	-
TR10974_c1_g1	2.67	22.08	-3.0491	down	0.0012127	0.036234	-	-	-	-	-	-	-	-
TR16082_c0_g1	0.31	12.68	-5.1438	down	0.0012109	0.036186	-	-	-	-	-	-	-	-
TR20190_c0_g1	23.91	3.51	2.7744	up	0.0012102	0.036171	membrane protein of ER body-like protein [Camellia sinensis]	-	-	-	-	-	-	-
TR135333_c0_g1	12.54	0.3	5.1975	up	0.0012094	0.036154	haloacid dehalogenase-like hydrolase domain-containing protein 3 isoform X1 [Camellia sinensis]	-	-	-	-	-	-	-
TR69719_c0_g3	0	9.2	-5.6426	down	0.0012088	0.036144	uncharacterized protein LOC114311106 [Camellia sinensis]	DNA repair protein RAD5A OS=Arabidopsis thaliana OX=3702 GN=RAD5A PE=1 SV=1	-	-	-	-	-	-
TR5227_c1_g2	0	9.38	-5.6731	down	0.0012072	0.036101	protein TPX2-like [Camellia sinensis]	-	-	-	-	-	-	-
TR37376_c0_g1	3.4	24.84	-2.8805	down	0.0012054	0.036051	uncharacterized membrane protein C776.05-like isoform X2 [Camellia sinensis]	-	-	-	-	-	-	-
TR13402_c0_g1	0	9.31	-5.6595	down	0.001205	0.036042	-	-	-	-	-	-	-	-
TR26779_c1_g1	0	9.71	-5.7184	down	0.0012024	0.03597	-	-	-	-	-	-	-	-
TR8517_c0_g2	0	9.33	-5.6616	down	0.0012023	0.03597	-	-	-	-	-	-	-	-
TR2455_c0_g1	108.67	32.04	1.7655	up	0.0012024	0.03597	uncharacterized protein LOC114283050 [Camellia sinensis]	-	Protein of unknown function (DUF1677)	-	-	-	-	-
TR4144_c0_g2	240.12	26.87	3.1613	up	0.0012015	0.035956	protein YLS3-like [Camellia sinensis]	Protein YLS3 OS=Arabidopsis thaliana OX=3702 GN=YLS3 PE=2 SV=1	Probable lipid transfer;Protease inhibitor/seed storage/LTP family	-	-	-	-	-
TR13038_c1_g1	83.97	24.12	1.8034	up	0.0012012	0.03595	CBL-interacting protein kinase 23-like isoform X1 [Camellia sinensis]|XP_028097643.1 CBL-interacting protein kinase 23-like isoform X1 [Camellia sinensis]	CBL-interacting protein kinase 33 OS=Oryza sativa subsp. japonica OX=39947 GN=CIPK33 PE=2 SV=1	-	-	-	-	-	-
TR34396_c1_g1	2.37	22.95	-3.2884	down	0.0012007	0.035939	-	-	-	-	-	-	-	-
TR512_c5_g1	8.94	0	5.674	up	0.0012005	0.035937	-	-	-	-	-	-	-	-
TR77670_c0_g1	0	9.99	-5.7607	down	0.001199	0.035915	uncharacterized protein LOC114277656 [Camellia sinensis]	-	-	-	-	-	-	-
TR12846_c0_g2	0	9.15	-5.6365	down	0.0011996	0.035915	-	-	-	-	-	-	-	-
TR85068_c0_g1	0	9.15	-5.6365	down	0.0011996	0.035915	-	-	-	-	-	-	-	-
TR46332_c0_g1	8.92	0	5.6707	up	0.0011995	0.035915	coatomer subunit gamma-2 isoform X1 [Camellia sinensis]	Coatomer subunit gamma-1 OS=Oryza sativa subsp. japonica OX=39947 GN=Os03g0227000 PE=2 SV=2	Coatomer gamma subunit appendage platform subdomain	-	-	-	-	-
TR42287_c0_g1	9.09	0	5.6965	up	0.0011995	0.035915	uncharacterized protein LOC114276558 [Camellia sinensis]	-	-	-	-	-	-	-
TR12550_c1_g1	3.65	25.13	-2.7816	down	0.0011973	0.035877	uncharacterized protein LOC114299143 isoform X2 [Camellia sinensis]	-	-	-	-	-	-	-
TR87362_c1_g1	21.49	2.84	2.9141	up	0.0011967	0.035862	uncharacterized protein LOC110656979 isoform X1 [Hevea brasiliensis]	-	-	-	-	-	-	-
TR8160_c0_g2	0	9.14	-5.6343	down	0.0011955	0.035833	uncharacterized protein LOC114313574 [Camellia sinensis]	-	-	-	-	-	-	-
TR7145_c1_g1	416.13	199.56	1.0603	up	0.0011946	0.035809	probable serine/threonine-protein kinase At1g09600 [Camellia sinensis]	Probable serine/threonine-protein kinase At1g09600 OS=Arabidopsis thaliana OX=3702 GN=At1g09600 PE=3 SV=1	Protein kinase domain;Protein tyrosine kinase	-	-	-	-	-
TR15291_c0_g1	10.4	221.87	-4.4156	down	0.0011939	0.035792	uncharacterized protein At1g66480 [Camellia sinensis]	Uncharacterized protein At1g66480 OS=Arabidopsis thaliana OX=3702 GN=At1g66480 PE=2 SV=1	Domain of unknown function (DUF4228)	-	-	-	-	-
TR14864_c1_g1	0	9.41	-5.6772	down	0.001193	0.035769	hypothetical protein F511_45364 [Dorcoceras hygrometricum]	-	-	-	-	-	-	-
TR2624_c0_g1	0	9.41	-5.6772	down	0.001193	0.035769	F-box protein PP2-B15-like [Camellia sinensis]	F-box protein PP2-B15 OS=Arabidopsis thaliana OX=3702 GN=PP2B15 PE=2 SV=2	Phloem protein 2;F-box domain;F-box-like	-	-	-	-	-
TR11823_c0_g1	0.7	18.57	-4.7747	down	0.0011927	0.035768	structural constituent of ribosome [Ascochyta rabiei]	40S ribosomal protein S13-1 OS=Arabidopsis thaliana OX=3702 GN=RPS13A PE=2 SV=1	Ribosomal S13/S15 N-terminal domain;Ribosomal protein S15	metabolic process;peptide metabolic process;nitrogen compound metabolic process;biological_process;biosynthetic process;macromolecule biosynthetic process;cellular process;gene expression;protein metabolic process;cellular nitrogen compound metabolic process;cellular macromolecule biosynthetic process;peptide biosynthetic process;macromolecule metabolic process;cellular amide metabolic process;am…	molecular_function;structural molecule activity;nucleic acid binding;RNA binding;binding;rRNA binding;organic cyclic compound binding;heterocyclic compound binding;structural constituent of ribosome;small ribosomal subunit rRNA binding	intracellular;cellular_component;ribonucleoprotein complex;cytosol;ribosome;cell;nucleus;cytoplasm;intracellular membrane-bounded organelle;small ribosomal subunit;cytosolic ribosome;membrane-enclosed lumen;nuclear lumen;protein-containing complex;organelle;membrane-bounded organelle;non-membrane-bounded organelle;intracellular organelle;intracellular non-membrane-bounded organelle;organelle lume…	-	-
TR16662_c0_g1	0.65	15.35	-4.535	down	0.0011923	0.03576	-	-	-	-	-	-	-	-
TR1388_c2_g1	4.62	35.66	-2.9418	down	0.0011915	0.035742	leucine-rich repeat protein 1-like [Camellia sinensis]	Leucine-rich repeat protein 1 OS=Arabidopsis thaliana OX=3702 GN=LRR1 PE=1 SV=1	Leucine rich repeat;Leucine rich repeat N-terminal domain;Leucine Rich repeats (2 copies);Leucine Rich Repeat	-	-	-	-	-
TR27998_c0_g1	2.67	24.18	-3.1781	down	0.0011908	0.035726	unnamed protein product [Brassica rapa]	Multiple organellar RNA editing factor 9, chloroplastic OS=Arabidopsis thaliana OX=3702 GN=MORF9 PE=1 SV=1	-	-	-	-	-	-
TR86168_c0_g1	9.17	0	5.7077	up	0.0011909	0.035726	-	-	-	-	-	-	-	-
TR10336_c0_g2	21.65	68.82	-1.6686	down	0.0011905	0.035725	uncharacterized protein LOC114264104 [Camellia sinensis]	-	Domain of unknown function (DUF4218);Transposase family tnp2	-	-	-	-	-
TR18006_c0_g1	9.48	0	5.7569	up	0.0011903	0.035723	-	-	-	-	-	-	-	-
TR58992_c0_g1	9.11	0	5.6992	up	0.0011895	0.035704	uncharacterized protein LOC114300309 [Camellia sinensis]	-	-	-	-	-	-	-
TR203396_c0_g1	0.35	12.59	-5.1349	down	0.0011893	0.035701	-	-	-	-	-	-	-	-
TR41696_c0_g1	15.06	0.33	5.462	up	0.0011891	0.0357	probable carbohydrate esterase At4g34215 [Camellia sinensis]	Probable carbohydrate esterase At4g34215 OS=Arabidopsis thaliana OX=3702 GN=At4g34215 PE=1 SV=2	Carbohydrate esterase, sialic acid-specific acetylesterase	-	-	-	-	-
TR16076_c0_g1	0	9.14	-5.6343	down	0.0011888	0.035695	-	-	-	-	-	-	-	-
TR32429_c0_g1	17.1	60.51	-1.8246	down	0.001187	0.035653	protein NRT1/ PTR FAMILY 8.3-like, partial [Camellia sinensis]	-	-	-	-	-	-	-
TR61356_c1_g1	12.43	0.33	5.1863	up	0.0011872	0.035653	putative carrier protein [Helianthus annuus]	Mitochondrial phosphate carrier protein 3, mitochondrial OS=Arabidopsis thaliana OX=3702 GN=MPT3 PE=1 SV=1	-	-	-	-	-	-
TR60415_c0_g1	12.51	0.3	5.1978	up	0.0011859	0.035626	uncharacterized protein LOC114279296 [Camellia sinensis]	-	zinc-binding in reverse transcriptase	-	-	-	-	-
TR49344_c2_g2	9.98	0	5.8292	up	0.0011851	0.035603	-	-	-	-	-	-	-	-
TR8918_c0_g1	7.31	33.99	-2.2161	down	0.0011838	0.035569	transmembrane E3 ubiquitin-protein ligase FLY2-like [Camellia sinensis]	Transmembrane E3 ubiquitin-protein ligase FLY2 OS=Arabidopsis thaliana OX=3702 GN=FLY2 PE=2 SV=1	-	-	-	-	-	-
TR6821_c0_g1	76.92	503.14	-2.7096	down	0.0011826	0.035539	stellacyanin-like [Camellia sinensis]	Umecyanin OS=Armoracia rusticana OX=3704 PE=1 SV=1	Plastocyanin-like domain	-	-	-	-	-
TR30858_c0_g1	16.72	0.66	4.6946	up	0.0011816	0.035511	structural maintenance of chromosomes protein 4 [Camellia sinensis]	Structural maintenance of chromosomes protein 4 OS=Arabidopsis thaliana OX=3702 GN=SMC4 PE=1 SV=1	RecF/RecN/SMC N terminal domain;SMC proteins Flexible Hinge Domain;AAA domain;AAA domain, putative AbiEii toxin, Type IV TA system;P-loop containing region of AAA domain	-	-	-	K06675|SMC4; structural maintenance of chromosome 4	ko04111(Cellular Processes)
TR75535_c0_g1	9.13	0	5.7027	up	0.0011795	0.035454	eukaryotic translation initiation factor 5B [Camellia sinensis]	-	-	-	-	-	-	-
TR27401_c0_g1	9.38	0	5.7426	up	0.0011795	0.035454	-	-	-	-	-	-	-	-
TR163626_c0_g1	10.54	0	5.909	up	0.0011795	0.035454	-	-	-	-	-	-	-	-
TR49056_c0_g1	10.54	0	5.909	up	0.0011795	0.035454	protein JINGUBANG-like [Camellia sinensis]	-	WD domain, G-beta repeat	-	-	-	-	-
TR8696_c0_g2	4.29	25.85	-2.5842	down	0.0011775	0.035411	-	-	-	-	-	-	-	-
TR3935_c0_g4	9.38	0	5.7462	up	0.0011772	0.035405	-	-	-	-	-	-	-	-
TR42428_c0_g1	9.38	0	5.7462	up	0.0011772	0.035405	-	-	-	-	-	-	-	-
TR33314_c0_g1	136.7	364.43	-1.4143	down	0.0011766	0.035395	protein NDR1-like [Camellia sinensis]	Protein NDR1 OS=Arabidopsis thaliana OX=3702 GN=NDR1 PE=1 SV=1	-	-	-	-	-	-
TR1190_c0_g2	133.91	336.96	-1.3318	down	0.0011762	0.035389	cysteine-rich repeat secretory protein 3-like [Olea europaea var. sylvestris]	Cysteine-rich repeat secretory protein 3 OS=Arabidopsis thaliana OX=3702 GN=CRRSP3 PE=1 SV=1	Salt stress response/antifungal	-	-	-	-	-
TR17192_c1_g1	0	9.15	-5.6364	down	0.0011758	0.03538	-	-	-	-	-	-	-	-
TR60731_c0_g2	0	9.27	-5.6532	down	0.0011747	0.035358	-	-	-	-	-	-	-	-
TR135_c0_g2	0	9.17	-5.6384	down	0.0011743	0.035358	-	-	-	-	-	-	-	-
TR13645_c0_g2	0	9.17	-5.6384	down	0.0011743	0.035358	LOW QUALITY PROTEIN: kinesin-like protein KIN-5D [Camellia sinensis]	-	-	-	-	-	-	-
TR103894_c0_g1	57.07	17.63	1.6926	up	0.0011747	0.035358	alkaline/neutral invertase A, mitochondrial-like [Camellia sinensis]	Alkaline/neutral invertase A, mitochondrial OS=Arabidopsis thaliana OX=3702 GN=INVA PE=1 SV=1	Alkaline and neutral invertase	-	-	-	-	-
TR17320_c0_g1	9.14	0	5.7035	up	0.0011748	0.035358	-	-	-	-	-	-	-	-
TR43589_c0_g1	9.65	0	5.7875	up	0.0011741	0.035358	-	-	-	-	-	-	-	-
TR115679_c0_g1	14.89	0.3	5.446	up	0.0011733	0.035339	hypothetical protein AC579_5423 [Pseudocercospora musae]	-	-	-	-	-	-	-
TR94806_c0_g1	0	10.85	-5.8782	down	0.0011725	0.035318	hypothetical protein RSOLAG22IIIB_04235 [Rhizoctonia solani]	-	Barwin family;Lytic transglycolase	-	-	-	-	-
TR24793_c0_g1	4.85	32.33	-2.7557	down	0.0011722	0.035314	uncharacterized protein LOC114281693 [Camellia sinensis]	-	Reverse transcriptase (RNA-dependent DNA polymerase)	-	-	-	-	-
TR6803_c3_g1	209.44	97.99	1.0961	up	0.001172	0.035312	tRNAse Z TRZ4, mitochondrial-like isoform X2 [Camellia sinensis]	tRNAse Z TRZ4, mitochondrial OS=Arabidopsis thaliana OX=3702 GN=TRZ4 PE=2 SV=1	Beta-lactamase superfamily domain;tRNase Z endonuclease	-	-	-	K00784|rnz; ribonuclease Z [EC:3.1.26.11]	ko03013(Genetic Information Processing)
TR16973_c0_g1	0	10.18	-5.7913	down	0.0011702	0.035262	-	-	-	-	-	-	-	-
TR23795_c0_g1	21.48	70.73	-1.7151	down	0.0011692	0.035236	probable serine/threonine-protein kinase At1g09600 isoform X1 [Camellia sinensis]	Probable serine/threonine-protein kinase At1g09600 OS=Arabidopsis thaliana OX=3702 GN=At1g09600 PE=3 SV=1	Protein kinase domain;Protein tyrosine kinase	-	-	-	-	-
TR6158_c0_g1	202.2	75.76	1.4183	up	0.001169	0.035236	ferredoxin--NADP reductase, leaf-type isozyme, chloroplastic-like [Camellia sinensis]	Ferredoxin--NADP reductase, chloroplastic OS=Mesembryanthemum crystallinum OX=3544 GN=PETH PE=2 SV=1	Oxidoreductase NAD-binding domain	-	-	-	-	-
TR34469_c0_g1	9.07	0	5.694	up	0.0011687	0.035231	-	-	-	-	-	-	-	-
TR84284_c0_g1	9	0	5.6834	up	0.0011674	0.035197	-	-	-	-	-	-	-	-
TR84224_c0_g1	0	9.68	-5.7144	down	0.0011662	0.035171	L-type lectin-domain containing receptor kinase V.9-like [Camellia sinensis]|XP_028116507.1 L-type lectin-domain containing receptor kinase V.9-like [Camellia sinensis]|XP_028116508.1 L-type lectin-domain containing receptor kinase V.9-like [Camellia sinensis]	L-type lectin-domain containing receptor kinase V.9 OS=Arabidopsis thaliana OX=3702 GN=LECRK59 PE=2 SV=1	Legume lectin domain	-	-	-	-	-
TR54819_c3_g1	0	9.33	-5.6617	down	0.0011665	0.035171	hypothetical protein EUGRSUZ_H02772 [Eucalyptus grandis]	-	-	-	-	-	-	-
TR8038_c0_g1	0	9.33	-5.6617	down	0.0011665	0.035171	-	-	-	-	-	-	-	-
TR23983_c0_g1	9.16	0	5.7067	up	0.0011656	0.035157	-	-	-	-	-	-	-	-
TR12877_c0_g1	19.44	64.63	-1.7356	down	0.0011649	0.035141	BEL1-like homeodomain protein 10 [Camellia sinensis]	BEL1-like homeodomain protein 8 OS=Arabidopsis thaliana OX=3702 GN=BLH8 PE=1 SV=1	Associated with HOX;Homeobox KN domain;Homeobox domain	-	-	-	-	-
TR12177_c0_g1	3.58	29.53	-3.0341	down	0.001164	0.035119	LOW QUALITY PROTEIN: probable leucine-rich repeat receptor-like serine/threonine-protein kinase At3g14840 [Camellia sinensis]	-	-	-	-	-	-	-
TR22761_c2_g1	0	9.15	-5.6364	down	0.0011622	0.035071	-	-	-	-	-	-	-	-
TR40564_c0_g2	0	9.15	-5.6364	down	0.0011622	0.035071	favin-like [Camellia sinensis]	Basic agglutinin OS=Psophocarpus tetragonolobus OX=3891 GN=WBAI PE=1 SV=1	Legume lectin domain	-	-	-	-	-
TR25122_c1_g2	0.31	12.75	-5.1514	down	0.0011617	0.035067	-	-	-	-	-	-	-	-
TR114135_c0_g1	1.62	19.37	-3.5605	down	0.0011617	0.035067	ATP-citrate synthase beta chain protein 2 [Prunus persica]|XP_021831070.1 ATP-citrate synthase beta chain protein 2 [Prunus avium]|ONI28015.1 hypothetical protein PRUPE_1G117200 [Prunus persica]|ONI28016.1 hypothetical protein PRUPE_1G117200 [Prunus persica]	ATP-citrate synthase beta chain protein 1 OS=Oryza sativa subsp. japonica OX=39947 GN=ACLB-1 PE=2 SV=1	-	-	-	-	-	-
TR12261_c0_g1	1.67	18.76	-3.4915	down	0.0011612	0.035061	TMV resistance protein N-like [Camellia sinensis]	Disease resistance protein RPP2A OS=Arabidopsis thaliana OX=3702 GN=RPP2A PE=2 SV=1	-	-	-	-	-	-
TR1973_c1_g1	22.8	1.99	3.5463	up	0.001161	0.035058	uncharacterized protein LOC114306815 isoform X1 [Camellia sinensis]|XP_028107931.1 uncharacterized protein LOC114306815 isoform X1 [Camellia sinensis]|XP_028107932.1 uncharacterized protein LOC114306815 isoform X1 [Camellia sinensis]	Serine/threonine-protein kinase BLUS1 OS=Arabidopsis thaliana OX=3702 GN=BLUS1 PE=1 SV=1	-	-	-	-	-	-
TR98391_c0_g1	9.53	0	5.764	up	0.0011594	0.035013	-	-	-	-	-	-	-	-
TR15967_c0_g1	4.49	35.73	-3.0093	down	0.001159	0.035005	peroxidase 72-like [Camellia sinensis]	Peroxidase 72 OS=Arabidopsis thaliana OX=3702 GN=PER72 PE=1 SV=1	Peroxidase	-	-	-	K00430|E1.11.1.7; peroxidase [EC:1.11.1.7]	ko00940(Metabolism);ko01100(Metabolism);ko01110(Metabolism)
TR86949_c0_g1	0.31	13.14	-5.1967	down	0.0011582	0.034986	disease resistance protein RGA2-like [Camellia sinensis]	Putative disease resistance protein At3g14460 OS=Arabidopsis thaliana OX=3702 GN=At3g14460 PE=3 SV=1	-	-	-	-	-	-
TR1880_c0_g1	49.43	125.06	-1.3372	down	0.0011564	0.034938	-	-	-	-	-	-	-	-
TR19577_c0_g1	8.96	0	5.6771	up	0.0011562	0.034938	alkaline/neutral invertase A, mitochondrial isoform X1 [Camellia sinensis]|XP_028080451.1 alkaline/neutral invertase A, mitochondrial isoform X2 [Camellia sinensis]	Alkaline/neutral invertase A, mitochondrial OS=Arabidopsis thaliana OX=3702 GN=INVA PE=1 SV=1	-	-	-	-	-	-
TR1725_c6_g1	44.62	9.94	2.1584	up	0.0011559	0.034933	-	-	-	-	-	-	-	-
TR2265_c2_g1	0	9.17	-5.6386	down	0.0011548	0.034904	-	-	-	-	-	-	-	-
TR74063_c0_g1	0	9.17	-5.6386	down	0.0011548	0.034904	uncharacterized protein LOC114289173 [Camellia sinensis]	-	-	-	-	-	-	-
TR148399_c0_g1	0	9.32	-5.6595	down	0.001153	0.034866	-	-	-	-	-	-	-	-
TR213822_c0_g1	9.16	0	5.7057	up	0.0011524	0.034852	protein TOO MANY MOUTHS-like [Camellia sinensis]	Protein TOO MANY MOUTHS OS=Arabidopsis thaliana OX=3702 GN=TMM PE=1 SV=1	Leucine rich repeat;Leucine Rich repeats (2 copies);Leucine Rich Repeat	-	-	-	-	-
TR72227_c0_g1	10.6	0	5.9173	up	0.0011523	0.034852	-	-	-	-	-	-	-	-
TR3039_c0_g1	370.52	176.81	1.0668	up	0.001152	0.034847	cysteine-rich receptor-like protein kinase 3 [Camellia sinensis]	Cysteine-rich receptor-like protein kinase 3 OS=Arabidopsis thaliana OX=3702 GN=CRK3 PE=2 SV=1	Protein kinase domain;Protein tyrosine kinase;Protein kinase domain;Protein tyrosine kinase	-	-	-	-	-
TR14493_c0_g2	9.57	0	5.7686	up	0.0011506	0.03481	-	-	-	-	-	-	-	-
TR10197_c0_g1	0.66	15.32	-4.5259	down	0.0011499	0.034796	uncharacterized protein LOC114319860 isoform X1 [Camellia sinensis]	-	-	-	-	-	-	-
TR1102_c0_g1	1931.59	957.33	1.0129	up	0.00115	0.034796	glutamate--glyoxylate aminotransferase 2 [Camellia sinensis]	Glutamate--glyoxylate aminotransferase 2 OS=Arabidopsis thaliana OX=3702 GN=GGAT2 PE=1 SV=1	Aminotransferase class I and II	-	-	-	K14272|GGAT; glutamate--glyoxylate aminotransferase [EC:2.6.1.4 2.6.1.2 2.6.1.44]	ko00220(Metabolism);ko00250(Metabolism);ko00260(Metabolism);ko00630(Metabolism);ko00710(Metabolism);ko01100(Metabolism);ko01110(Metabolism);ko01120(Metabolism);ko01200(Metabolism);ko01210(Metabolism);ko01230(Metabolism)
TR26426_c1_g1	7.06	39.32	-2.4825	down	0.0011475	0.034736	-	-	-	-	-	-	-	-
TR19947_c0_g1	50.59	13.3	1.9263	up	0.0011476	0.034736	TIMELESS-interacting protein [Camellia sinensis]	-	Replication Fork Protection Component Swi3;Zinc knuckle	-	-	-	-	-
TR19977_c0_g1	9.73	0	5.7986	up	0.0011477	0.034736	-	-	-	-	-	-	-	-
TR39590_c1_g1	0	9.21	-5.6449	down	0.0011464	0.034713	-	-	-	-	-	-	-	-
TR1319_c3_g1	27.1	3.48	2.9593	up	0.0011461	0.034713	-	-	-	-	-	-	-	-
TR1451_c0_g1	253.59	116.6	1.1216	up	0.0011455	0.034703	adenine nucleotide transporter BT1, chloroplastic/mitochondrial-like [Camellia sinensis]|XP_028107990.1 adenine nucleotide transporter BT1, chloroplastic/mitochondrial-like [Camellia sinensis]	Adenine nucleotide transporter BT1, chloroplastic/mitochondrial OS=Arabidopsis thaliana OX=3702 GN=BT1 PE=1 SV=1	Mitochondrial carrier protein	-	-	-	-	-
TR78792_c1_g1	15.25	0.61	4.6073	up	0.0011437	0.034651	uncharacterized protein LOC114303518 [Camellia sinensis]|XP_028104457.1 uncharacterized protein LOC114303518 [Camellia sinensis]|XP_028104458.1 uncharacterized protein LOC114303518 [Camellia sinensis]|XP_028104459.1 uncharacterized protein LOC114303518 [Camellia sinensis]	-	-	-	-	-	-	-
TR47784_c0_g1	22.02	2.86	2.9458	up	0.0011432	0.03464	cytochrome P450 89A2-like [Camellia sinensis]	Cytochrome P450 89A2 OS=Arabidopsis thaliana OX=3702 GN=CYP89A2 PE=2 SV=2	Cytochrome P450	-	-	-	-	-
TR24909_c1_g1	0	9.17	-5.6385	down	0.0011425	0.034625	-	-	-	-	-	-	-	-
TR28936_c0_g1	0	9.17	-5.6385	down	0.0011425	0.034625	-	-	-	-	-	-	-	-
TR20190_c0_g2	9.03	0	5.6879	up	0.0011407	0.034577	membrane protein of ER body-like protein [Camellia sinensis]	Membrane protein of ER body-like protein OS=Arabidopsis thaliana OX=3702 GN=MEBL PE=2 SV=1	-	-	-	-	-	-
TR46282_c0_g3	9.13	0	5.7025	up	0.0011398	0.034554	-	-	-	-	-	-	-	-
TR30357_c0_g1	0	10.49	-5.8327	down	0.0011393	0.034545	uncharacterized protein LOC114312278 [Camellia sinensis]	-	Agglutinin domain	-	-	-	-	-
TR23740_c0_g1	9.25	48.14	-2.364	down	0.0011389	0.034534	protein NLP7-like isoform X2 [Camellia sinensis]	Protein NLP7 OS=Arabidopsis thaliana OX=3702 GN=NLP7 PE=1 SV=2	-	-	-	-	-	-
TR3154_c3_g1	28.35	5.4	2.393	up	0.0011388	0.034534	-	-	-	-	-	-	-	-
TR42390_c0_g1	0	9.38	-5.6732	down	0.0011382	0.034522	-	-	-	-	-	-	-	-
TR11734_c0_g1	629.15	267.73	1.2326	up	0.0011366	0.034477	uncharacterized protein ycf45 [Camellia sinensis]	-	AAA domain;AAA ATPase domain	-	-	-	-	-
TR24144_c0_g1	0	9.18	-5.6406	down	0.0011356	0.034451	-	-	-	-	-	-	-	-
TR90080_c1_g1	9.18	0	5.7131	up	0.0011353	0.034447	BTB/POZ domain-containing protein At3g09030 [Camellia sinensis]	-	-	-	-	-	-	-
TR716_c0_g4	14.76	0.64	4.5387	up	0.0011349	0.034441	uncharacterized protein LOC114283475 isoform X4 [Camellia sinensis]|XP_028082090.1 uncharacterized protein LOC114283475 isoform X4 [Camellia sinensis]	-	-	-	-	-	-	-
TR11805_c0_g1	2.03	20.7	-3.3588	down	0.0011336	0.03441	-	-	-	-	-	-	-	-
TR11893_c0_g1	1854.6	375.89	2.3025	up	0.001133	0.034398	-	-	-	-	-	-	-	-
TR30510_c0_g1	0.62	16.04	-4.6162	down	0.001132	0.034373	-	-	-	-	-	-	-	-
TR102388_c0_g1	0.35	15.8	-5.4581	down	0.0011317	0.034368	F-type H+-transporting ATPase subunit beta [Rhizoctonia solani]	ATP synthase subunit beta, mitochondrial OS=Oryza sativa subsp. japonica OX=39947 GN=ATPB PE=1 SV=2	ATP synthase alpha/beta family, nucleotide-binding domain;ATP synthase alpha/beta family, beta-barrel domain	-	-	-	-	-
TR35782_c0_g1	0.62	16.17	-4.629	down	0.0011316	0.034368	putative disease resistance RPP13-like protein 1, partial [Camellia sinensis]	Putative disease resistance RPP13-like protein 1 OS=Arabidopsis thaliana OX=3702 GN=RPPL1 PE=3 SV=1	NB-ARC domain	-	-	-	-	-
TR6651_c0_g1	26.92	3.78	2.8311	up	0.0011305	0.034339	meiosis-specific protein ASY1-like [Camellia sinensis]	Meiosis-specific protein PAIR2 OS=Oryza sativa subsp. japonica OX=39947 GN=PAIR2 PE=2 SV=1	HORMA domain	-	-	-	-	-
TR8504_c0_g1	17.54	1.28	3.7795	up	0.0011302	0.034337	-	-	-	-	-	-	-	-
TR7011_c0_g1	9.11	0	5.6984	up	0.0011286	0.034298	fasciclin-like arabinogalactan protein 19 [Camellia sinensis]	-	-	-	-	-	-	-
TR18610_c1_g1	305.4	149.45	1.0307	up	0.0011283	0.034293	elastin [Camellia sinensis]	-	-	-	-	-	-	-
TR4437_c0_g1	202.19	74.33	1.4438	up	0.0011277	0.034279	Mitochondrial pyruvate carrier like [Actinidia chinensis var. chinensis]	Mitochondrial pyruvate carrier 3 OS=Arabidopsis thaliana OX=3702 GN=MPC3 PE=2 SV=1	-	-	-	-	-	-
TR22034_c0_g1	1.31	18.17	-3.7827	down	0.0011275	0.034278	gibberellin 2-beta-dioxygenase 2-like [Camellia sinensis]|AVZ45856.1 gibberellin 2-oxidase 6 [Camellia sinensis]	Gibberellin 2-beta-dioxygenase 2 OS=Pisum sativum OX=3888 GN=GA2OX2 PE=2 SV=1	2OG-Fe(II) oxygenase superfamily;non-haem dioxygenase in morphine synthesis N-terminal	-	-	-	K04125|GA2ox; gibberellin 2beta-dioxygenase [EC:1.14.11.13]	ko00904(Metabolism);ko01110(Metabolism)
TR21933_c0_g3	0	9.62	-5.7062	down	0.0011269	0.034266	-	-	-	-	-	-	-	-
TR49174_c0_g1	0	9.23	-5.6469	down	0.001127	0.034266	uncharacterized protein LOC114278771 [Camellia sinensis]	-	-	-	-	-	-	-
TR126625_c0_g1	0	9.18	-5.6406	down	0.001127	0.034266	uncharacterized protein LOC114276709 [Camellia sinensis]	-	-	-	-	-	-	-
TR71243_c0_g2	0	9.18	-5.6406	down	0.001127	0.034266	-	-	-	-	-	-	-	-
TR29715_c0_g1	91.14	272.3	-1.5782	down	0.0011268	0.034266	gibberellin 2-beta-dioxygenase-like [Camellia sinensis]|ASJ80915.1 gibberellin 2-oxidase 3 [Camellia sinensis]	Gibberellin 2-beta-dioxygenase OS=Phaseolus coccineus OX=3886 GN=GA2OX1 PE=2 SV=1	non-haem dioxygenase in morphine synthesis N-terminal;2OG-Fe(II) oxygenase superfamily	-	-	-	K04125|GA2ox; gibberellin 2beta-dioxygenase [EC:1.14.11.13]	ko00904(Metabolism);ko01110(Metabolism)
TR8368_c0_g1	51.13	12.85	1.9985	up	0.0011262	0.034261	probable protein phosphatase 2C 24 [Camellia sinensis]	Probable protein phosphatase 2C 24 OS=Arabidopsis thaliana OX=3702 GN=At2g29380 PE=2 SV=1	-	-	-	-	-	-
TR105090_c0_g1	17.2	0.95	4.1759	up	0.001126	0.034261	RPM1-interacting protein 4-like isoform X1 [Camellia sinensis]	RPM1-interacting protein 4 OS=Arabidopsis thaliana OX=3702 GN=RIN4 PE=1 SV=1	Cleavage site for pathogenic type III effector avirulence factor Avr	-	-	-	K13456|RIN4; RPM1-interacting protein 4	ko04626(Organismal Systems)
TR85502_c0_g1	9.07	0	5.6929	up	0.0011237	0.034194	-	-	-	-	-	-	-	-
TR233_c1_g1	224.41	465.84	-1.054	down	0.0011226	0.034166	uncharacterized protein LOC114261536 isoform X2 [Camellia sinensis]	-	-	-	-	-	-	-
TR149481_c0_g1	9.03	0	5.6877	up	0.0011202	0.034102	-	-	-	-	-	-	-	-
TR4164_c4_g1	14.84	52.5	-1.8183	down	0.0011199	0.034095	uncharacterized protein LOC114264535 isoform X1 [Camellia sinensis]|XP_028060975.1 uncharacterized protein LOC114264535 isoform X3 [Camellia sinensis]|XP_028060977.1 uncharacterized protein LOC114264535 isoform X1 [Camellia sinensis]|XP_028060978.1 uncharacterized protein LOC114264535 isoform X1 [Camellia sinensis]	-	-	-	-	-	-	-
TR38528_c0_g1	8.98	0	5.6803	up	0.0011198	0.034095	-	-	-	-	-	-	-	-
TR73447_c0_g1	8.98	0	5.6803	up	0.0011198	0.034095	uncharacterized protein LOC114306586 [Camellia sinensis]	Uncharacterized mitochondrial protein AtMg00310 OS=Arabidopsis thaliana OX=3702 GN=AtMg00310 PE=4 SV=1	zinc-binding in reverse transcriptase	-	-	-	-	-
TR118267_c0_g1	5.89	31.22	-2.3964	down	0.0011188	0.034074	tRNA-dihydrouridine(47) synthase [NAD(P)(+)]-like [Camellia sinensis]	tRNA-dihydrouridine(47) synthase [NAD(P)(+)]-like OS=Arabidopsis thaliana OX=3702 GN=At4g38890 PE=1 SV=2	-	-	-	-	-	-
TR15034_c0_g1	47.66	309.23	-2.6987	down	0.001118	0.034055	UPF0481 protein At3g47200 [Jatropha curcas]|KDP34695.1 hypothetical protein JCGZ_10900 [Jatropha curcas]	UPF0481 protein At3g47200 OS=Arabidopsis thaliana OX=3702 GN=At3g47200 PE=2 SV=1	Plant protein of unknown function;Plant protein of unknown function	-	-	-	-	-
TR108737_c0_g1	29.4	5.72	2.3643	up	0.001118	0.034055	-	-	-	-	-	-	-	-
TR259544_c0_g1	0	10.78	-5.8687	down	0.0011176	0.034053	putative lipid-transfer protein DIR1 [Hevea brasiliensis]	-	-	-	-	-	-	-
TR5053_c0_g1	63.34	18.52	1.7705	up	0.0011177	0.034053	clathrin light chain 2-like [Camellia sinensis]	Clathrin light chain 1 OS=Arabidopsis thaliana OX=3702 GN=At2g20760 PE=2 SV=1	Clathrin light chain	-	-	-	-	-
TR141063_c0_g1	8.99	0	5.6814	up	0.0011164	0.034026	uncharacterized protein LOC114258527 [Camellia sinensis]	-	-	-	-	-	-	-
TR14651_c0_g2	1.31	16.78	-3.6625	down	0.0011158	0.034011	-	-	-	-	-	-	-	-
TR1141_c2_g1	1.39	20.22	-3.8918	down	0.0011156	0.03401	uncharacterized protein LOC114308662 [Camellia sinensis]	-	Retrotransposon gag protein;Zinc knuckle;Retrotransposon gag protein;Zinc knuckle	-	-	-	-	-
TR7405_c0_g1	6.36	31.06	-2.2904	down	0.0011149	0.033994	uncharacterized protein LOC114322489 isoform X2 [Camellia sinensis]	-	-	-	-	-	-	-
TR22969_c0_g1	12.36	0.33	5.1783	up	0.0011146	0.033989	-	-	-	-	-	-	-	-
TR89592_c0_g1	0	9.2	-5.6427	down	0.0011134	0.033956	-	-	-	-	-	-	-	-
TR33489_c1_g1	0	9.26	-5.6512	down	0.0011126	0.033936	uncharacterized protein LOC114279294 [Camellia sinensis]	-	-	-	-	-	-	-
TR20660_c0_g1	331.82	754.37	-1.185	down	0.0011122	0.033928	L-type lectin-domain containing receptor kinase V.9-like [Camellia sinensis]	L-type lectin-domain containing receptor kinase V.9 OS=Arabidopsis thaliana OX=3702 GN=LECRK59 PE=2 SV=1	Protein kinase domain;Protein tyrosine kinase;Legume lectin domain;NAD binding domain of 6-phosphogluconate dehydrogenase;NAD-binding of NADP-dependent 3-hydroxyisobutyrate dehydrogenase;D-isomer specific 2-hydroxyacid dehydrogenase, NAD binding domain;NADP oxidoreductase coenzyme F420-dependent	-	-	-	K23146|HPD1; 3-hydroxyisobutyrate/3-hydroxypropionate dehydrogenase [EC:1.1.1.31 1.1.1.59]	ko00280(Metabolism);ko00410(Metabolism);ko00640(Metabolism);ko01100(Metabolism);ko01200(Metabolism)
TR5950_c5_g1	0	9.51	-5.6915	down	0.0011116	0.033913	-	-	-	-	-	-	-	-
TR27797_c0_g1	3563.81	1454.34	1.2931	up	0.0011114	0.033912	dormancy-associated protein homolog 3-like isoform X1 [Camellia sinensis]	Dormancy-associated protein homolog 3 OS=Arabidopsis thaliana OX=3702 GN=At1g56220 PE=1 SV=1	Dormancy/auxin associated protein	-	-	-	-	-
TR113720_c0_g1	0	9.41	-5.6774	down	0.0011107	0.033892	U-box domain-containing protein 9-like [Camellia sinensis]	-	-	-	-	-	-	-
TR121946_c1_g2	9.12	0	5.7004	up	0.00111	0.033875	uncharacterized protein LOC114294004 [Camellia sinensis]|XP_028093911.1 uncharacterized protein LOC114294008 [Camellia sinensis]	-	-	-	-	-	-	-
TR11513_c0_g2	190.03	402.16	-1.0815	down	0.0011097	0.033871	probable serine/threonine-protein kinase PBL1 isoform X2 [Camellia sinensis]	Probable serine/threonine-protein kinase PIX7 OS=Arabidopsis thaliana OX=3702 GN=PIX7 PE=1 SV=1	Protein tyrosine kinase;Protein kinase domain	-	-	-	-	-
TR95209_c0_g1	9.1	0	5.6972	up	0.0011096	0.033871	ubiquitin carboxyl-terminal hydrolase 18-like [Camellia sinensis]	Ubiquitin carboxyl-terminal hydrolase 18 OS=Arabidopsis thaliana OX=3702 GN=UBP18 PE=2 SV=2	Ubiquitin carboxyl-terminal hydrolase	-	-	-	-	-
TR982_c1_g1	201.98	91.19	1.1474	up	0.0011082	0.033836	uncharacterized protein LOC114270404 [Camellia sinensis]	-	-	-	-	-	-	-
TR14849_c0_g1	88.53	32.48	1.448	up	0.0011079	0.033834	protein ABHD11-like [Camellia sinensis]	-	Alpha/beta hydrolase family;Alpha/beta hydrolase family;Serine aminopeptidase, S33;alpha/beta hydrolase fold	-	-	-	-	-
TR50528_c1_g1	0.34	12.8	-5.1562	down	0.0011062	0.033787	-	-	-	-	-	-	-	-
TR2283_c1_g2	11.07	50.05	-2.1806	down	0.0011063	0.033787	katanin p60 ATPase-containing subunit A-like 2 isoform X7 [Camellia sinensis]	ABC transporter B family member 11 OS=Arabidopsis thaliana OX=3702 GN=ABCB11 PE=2 SV=1	-	-	-	-	-	-
TR17967_c0_g1	67.51	166.66	-1.3016	down	0.0011061	0.033787	peptidyl-prolyl cis-trans isomerase-like [Camellia sinensis]	Peptidyl-prolyl cis-trans isomerase OS=Catharanthus roseus OX=4058 GN=PCKR1 PE=1 SV=1	Cyclophilin type peptidyl-prolyl cis-trans isomerase/CLD	-	-	-	-	-
TR7257_c0_g1	474.64	223.33	1.0881	up	0.0011062	0.033787	uncharacterized protein LOC114268033 [Camellia sinensis]	-	-	-	-	-	-	-
TR1117_c2_g1	85.61	29.69	1.5283	up	0.001106	0.033787	tubulin beta chain-like [Camellia sinensis]	Tubulin beta-3 chain OS=Oryza sativa subsp. japonica OX=39947 GN=TUBB3 PE=2 SV=2	Tubulin/FtsZ family, GTPase domain	-	-	-	-	-
TR12445_c0_g2	0	9.46	-5.6834	down	0.0011049	0.033767	agamous-like MADS-box protein AGL61 [Camellia sinensis]	-	-	-	-	-	-	-
TR2054_c0_g2	1.94	20.55	-3.3822	down	0.0011049	0.033767	receptor-like protein 33 [Camellia sinensis]	-	-	-	-	-	-	-
TR25340_c0_g1	1.39	18.59	-3.7775	down	0.0011046	0.033764	protein NLP6-like [Camellia sinensis]	Protein NLP6 OS=Arabidopsis thaliana OX=3702 GN=NLP6 PE=2 SV=2	-	-	-	-	-	-
TR20479_c0_g1	36.46	224.33	-2.6207	down	0.0011041	0.033756	receptor-like protein EIX1 [Camellia sinensis]	Receptor-like protein EIX2 OS=Solanum lycopersicum OX=4081 GN=EIX2 PE=1 SV=2	Leucine rich repeat;Leucine Rich repeats (2 copies);Leucine Rich Repeat;Leucine Rich repeat	-	-	-	K13466|EIX1_2; EIX receptor 1/2	ko04626(Organismal Systems)
TR20515_c0_g1	17.41	58.46	-1.7488	down	0.0011027	0.033716	disease resistance protein RPP8-like isoform X1 [Camellia sinensis]	Disease resistance protein RPP8 OS=Arabidopsis thaliana OX=3702 GN=RPP8 PE=1 SV=2	NB-ARC domain	-	-	-	-	-
TR2171_c8_g1	0.31	13.22	-5.202	down	0.0011021	0.033702	-	-	-	-	-	-	-	-
TR11_c4_g1	4.58	28.29	-2.6157	down	0.0011017	0.033692	-	-	-	-	-	-	-	-
TR4283_c1_g1	0.34	12.96	-5.1765	down	0.0011014	0.033688	-	-	-	-	-	-	-	-
TR6925_c1_g1	9.24	38.87	-2.0684	down	0.0011012	0.033685	Uncharacterized protein TCM_009073 [Theobroma cacao]	-	-	-	-	-	-	-
TR1979_c1_g1	0.34	12.65	-5.1409	down	0.0011004	0.033667	-	-	-	-	-	-	-	-
TR202_c2_g1	0	9.24	-5.6491	down	0.0010994	0.033647	-	-	-	-	-	-	-	-
TR3742_c1_g1	434.38	982.63	-1.1775	down	0.0010997	0.033647	-	-	-	-	-	-	-	-
TR246_c4_g1	2768.27	1163.48	1.2505	up	0.0010996	0.033647	alpha,alpha-trehalose-phosphate synthase [UDP-forming] 6-like [Camellia sinensis]	Alpha,alpha-trehalose-phosphate synthase [UDP-forming] 6 OS=Arabidopsis thaliana OX=3702 GN=TPS6 PE=1 SV=2	Glycosyltransferase family 20;Trehalose-phosphatase;haloacid dehalogenase-like hydrolase	-	-	-	K16055|TPS; trehalose 6-phosphate synthase/phosphatase [EC:2.4.1.15 3.1.3.12]	ko00500(Metabolism);ko01100(Metabolism);ko01110(Metabolism)
TR40909_c0_g1	9.08	0	5.6942	up	0.0010996	0.033647	monothiol glutaredoxin-S15, mitochondrial-like [Camellia sinensis]	-	-	-	-	-	-	-
TR16922_c0_g1	79.48	239.85	-1.594	down	0.0010981	0.033616	probable RNA-dependent RNA polymerase 1 [Camellia sinensis]	RNA-dependent RNA polymerase 1 OS=Arabidopsis thaliana OX=3702 GN=RDR1 PE=2 SV=1	RNA dependent RNA polymerase	-	-	-	-	-
TR19414_c0_g1	0	9.98	-5.7618	down	0.0010965	0.033572	-	-	-	-	-	-	-	-
TR11121_c1_g1	224.19	105.86	1.0833	up	0.0010965	0.033572	uncharacterized protein LOC114255813 [Camellia sinensis]	-	-	-	-	-	-	-
TR52_c11_g1	9.06	0	5.6919	up	0.0010961	0.033567	-	-	-	-	-	-	-	-
TR93461_c0_g2	0	9.43	-5.6793	down	0.001093	0.033476	-	-	-	-	-	-	-	-
TR16759_c0_g1	0.69	15.25	-4.5011	down	0.0010919	0.033451	probable LRR receptor-like serine/threonine-protein kinase At3g47570 [Camellia sinensis]	Probable LRR receptor-like serine/threonine-protein kinase At3g47570 OS=Arabidopsis thaliana OX=3702 GN=At3g47570 PE=2 SV=1	-	-	-	-	-	-
TR3585_c0_g1	3.99	25.53	-2.6766	down	0.0010915	0.033442	-	-	-	-	-	-	-	-
TR111681_c0_g1	0	9.64	-5.7131	down	0.0010911	0.033435	B2 protein-like [Camellia sinensis]	B2 protein OS=Daucus carota OX=4039 PE=2 SV=1	-	-	-	-	-	-
TR21017_c0_g1	0	9.64	-5.7131	down	0.0010911	0.033435	putative F-box protein At1g67623 [Camellia sinensis]	-	-	-	-	-	-	-
TR19107_c0_g1	9.33	0	5.7348	up	0.0010903	0.033417	hypothetical protein EUGRSUZ_E00717 [Eucalyptus grandis]	-	-	-	-	-	-	-
TR7639_c0_g2	9.08	0	5.6952	up	0.001089	0.033382	-	-	-	-	-	-	-	-
TR13088_c0_g1	12.49	0.33	5.1956	up	0.0010886	0.033374	uncharacterized protein LOC114286266 isoform X9 [Camellia sinensis]	-	-	-	-	-	-	-
TR31465_c0_g1	43.87	145.88	-1.7349	down	0.0010883	0.033368	disease resistance protein RPP13-like [Camellia sinensis]	Putative disease resistance protein At1g50180 OS=Arabidopsis thaliana OX=3702 GN=At1g50180 PE=3 SV=2	NB-ARC domain;Leucine rich repeat	-	-	-	-	-
TR134401_c0_g1	9.05	0	5.6899	up	0.0010883	0.033368	-	-	-	-	-	-	-	-
TR4541_c0_g1	99.57	263.87	-1.4037	down	0.0010871	0.033341	uncharacterized protein LOC114315499 [Camellia sinensis]	-	-	-	-	-	-	-
TR68780_c1_g1	9.36	0	5.7399	up	0.0010869	0.03334	uncharacterized protein LOC114269496 [Camellia sinensis]	-	-	-	-	-	-	-
TR7496_c0_g1	10.02	0	5.8381	up	0.001087	0.03334	-	-	-	-	-	-	-	-
TR111787_c0_g1	20.24	1.86	3.4271	up	0.0010866	0.033339	putative disease resistance protein RGA1 [Camellia sinensis]	-	-	-	-	-	-	-
TR48107_c0_g1	1.02	17.57	-4.1207	down	0.0010862	0.03333	-	-	-	-	-	-	-	-
TR23917_c0_g1	0.62	16.08	-4.6214	down	0.0010856	0.033316	receptor-like protein 9DC3 isoform X4 [Camellia sinensis]	-	-	-	-	-	-	-
TR28073_c0_g2	16.94	1	4.1276	up	0.0010856	0.033316	BAG family molecular chaperone regulator 2-like [Camellia sinensis]	BAG family molecular chaperone regulator 2 OS=Arabidopsis thaliana OX=3702 GN=BAG2 PE=1 SV=1	Ubiquitin family	-	-	-	-	-
TR19493_c0_g1	15.2	57	-1.9039	down	0.0010836	0.033262	UPF0481 protein At3g47200-like [Camellia sinensis]	Putative UPF0481 protein At3g02645 OS=Arabidopsis thaliana OX=3702 GN=At3g02645 PE=3 SV=1	Plant protein of unknown function	-	-	-	-	-
TR1528_c0_g1	872.25	1900.23	-1.1232	down	0.0010836	0.033262	putative late blight resistance protein homolog R1B-14 isoform X1 [Camellia sinensis]|XP_028098605.1 putative late blight resistance protein homolog R1B-14 isoform X1 [Camellia sinensis]	Putative late blight resistance protein homolog R1B-16 OS=Solanum demissum OX=50514 GN=R1B-16 PE=3 SV=1	NB-ARC domain	-	-	-	-	-
TR141161_c0_g1	36.74	4.84	2.935	up	0.0010833	0.033259	QWRF motif-containing protein 2-like [Camellia sinensis]	QWRF motif-containing protein 2 OS=Arabidopsis thaliana OX=3702 GN=QWRF2 PE=2 SV=1	QWRF family	-	-	-	-	-
TR8849_c0_g1	285.98	130.06	1.1373	up	0.0010815	0.033209	transcription termination factor MTERF5, chloroplastic isoform X2 [Camellia sinensis]	Transcription termination factor MTERF5, chloroplastic OS=Arabidopsis thaliana OX=3702 GN=MTERF5 PE=2 SV=1	mTERF	-	-	-	-	-
TR3203_c0_g4	1.74	21.31	-3.6445	down	0.0010798	0.033161	-	-	-	-	-	-	-	-
TR13975_c0_g1	0.34	12.68	-5.1439	down	0.0010786	0.033128	-	-	-	-	-	-	-	-
TR15004_c0_g1	90.19	210.19	-1.2217	down	0.0010776	0.0331	PI-PLC X domain-containing protein At5g67130-like [Camellia sinensis]	PI-PLC X domain-containing protein At5g67130 OS=Arabidopsis thaliana OX=3702 GN=At5g67130 PE=1 SV=1	-	-	-	-	-	-
TR1790_c1_g1	1	16.49	-4.0463	down	0.0010759	0.033057	-	-	-	-	-	-	-	-
TR8923_c0_g1	163.59	332.22	-1.0218	down	0.0010746	0.033026	hypothetical protein DVH24_034539 [Malus domestica]	E3 ubiquitin-protein ligase UPL3 OS=Arabidopsis thaliana OX=3702 GN=UPL3 PE=1 SV=1	-	-	-	-	-	-
TR21681_c0_g1	0	9.66	-5.712	down	0.0010744	0.033023	CSC1-like protein HYP1 [Camellia sinensis]|XP_028082559.1 CSC1-like protein HYP1 [Camellia sinensis]	CSC1-like protein HYP1 OS=Arabidopsis thaliana OX=3702 GN=HYP1 PE=2 SV=1	Late exocytosis, associated with Golgi transport	-	-	-	-	-
TR98629_c0_g1	0	9.49	-5.6878	down	0.0010739	0.033011	protein RAE1 [Camellia sinensis]	Protein RAE1 OS=Arabidopsis thaliana OX=3702 GN=RAE1 PE=1 SV=2	-	-	-	-	-	-
TR1710_c1_g1	506.63	250.57	1.0154	up	0.0010737	0.033011	D-aminoacyl-tRNA deacylase [Camellia sinensis]	-	D-Tyr-tRNA(Tyr) deacylase	-	-	-	-	-
TR4476_c0_g1	302.9	143.52	1.0775	up	0.0010733	0.033002	uncharacterized protein LOC114318097 [Camellia sinensis]	-	Serine aminopeptidase, S33;alpha/beta hydrolase fold	-	-	-	-	-
TR1168_c0_g1	325.07	710.5	-1.1286	down	0.001073	0.032995	pirin-like protein [Camellia sinensis]	Pirin-like protein OS=Solanum lycopersicum OX=4081 PE=2 SV=1	Pirin C-terminal cupin domain;Pirin	-	-	-	-	-
TR8022_c4_g1	12.39	0.3	5.1823	up	0.0010728	0.032994	-	-	-	-	-	-	-	-
TR580_c2_g1	127.62	357.11	-1.4848	down	0.0010725	0.032989	wall-associated receptor kinase 2-like isoform X1 [Camellia sinensis]	Wall-associated receptor kinase 2 OS=Arabidopsis thaliana OX=3702 GN=WAK2 PE=1 SV=1	Protein kinase domain;Protein tyrosine kinase;Wall-associated receptor kinase galacturonan-binding;Complement Clr-like EGF-like;Calcium-binding EGF domain;Wall-associated kinase	-	-	-	-	-
TR18489_c2_g1	9.98	0	5.8364	up	0.0010724	0.032989	PREDICTED: elongation factor TuB, chloroplastic [Solanum tuberosum]	Elongation factor Tu, chloroplastic OS=Glycine max OX=3847 GN=TUFB1 PE=3 SV=1	-	-	-	-	-	-
TR23896_c0_g2	10.52	0	5.9062	up	0.0010712	0.032958	hypothetical protein FE78DRAFT_490608 [Acidomyces richmondensis]|KYG40440.1 hypothetical protein M433DRAFT_8812 [Acidomyces richmondensis BFW]	-	-	-	-	-	-	-
TR1391_c0_g1	27.88	82.78	-1.569	down	0.0010701	0.032933	-	-	-	-	-	-	-	-
TR8457_c0_g1	62.98	158.09	-1.3266	down	0.0010702	0.032933	uncharacterized protein LOC114289482 isoform X2 [Camellia sinensis]	-	-	-	-	-	-	-
TR13559_c0_g1	17.91	1.59	3.4944	up	0.0010703	0.032933	-	-	-	-	-	-	-	-
TR31435_c0_g1	0.34	12.71	-5.147	down	0.0010693	0.032914	uncharacterized protein LOC114312233 isoform X1 [Camellia sinensis]	-	Plant transposase (Ptta/En/Spm family)	-	-	-	-	-
TR6243_c4_g1	5.89	34.67	-2.5489	down	0.0010692	0.032914	probable potassium transporter 17 [Camellia sinensis]	-	-	-	-	-	-	-
TR17153_c0_g1	14.53	55.62	-1.9336	down	0.0010689	0.032914	PREDICTED: ras-related protein RABD1-like isoform X2 [Vigna angularis]	GTP-binding protein YPTM1 OS=Zea mays OX=4577 GN=YPTM1 PE=2 SV=2	-	-	-	-	-	-
TR14178_c0_g1	17.2	58.03	-1.7589	down	0.0010691	0.032914	uncharacterized protein LOC114314424 [Camellia sinensis]	-	-	-	-	-	-	-
TR33746_c1_g1	9.43	0	5.7536	up	0.0010685	0.032906	alpha-glucan water dikinase, chloroplastic-like [Camellia sinensis]	-	-	-	-	-	-	-
TR30786_c0_g1	3.68	25.41	-2.79	down	0.0010682	0.032903	TMV resistance protein N-like [Camellia sinensis]	TMV resistance protein N OS=Nicotiana glutinosa OX=35889 GN=N PE=1 SV=1	NB-ARC domain	-	-	-	-	-
TR34575_c0_g1	0.97	16.88	-4.0976	down	0.001068	0.0329	Protein transport protein like [Actinidia chinensis var. chinensis]	Protein unc-13 homolog OS=Arabidopsis thaliana OX=3702 GN=PATROL1 PE=2 SV=1	Plant family of unknown function (DUF810);Plant family of unknown function (DUF810)	-	-	-	-	-
TR12583_c5_g1	0	9.66	-5.7151	down	0.0010676	0.032896	-	-	-	-	-	-	-	-
TR4427_c3_g1	0.97	16.52	-4.0607	down	0.0010678	0.032896	probable disease resistance protein At4g27220 [Camellia sinensis]	Disease resistance protein RPS2 OS=Arabidopsis thaliana OX=3702 GN=RPS2 PE=1 SV=1	NB-ARC domain	-	-	-	-	-
TR38413_c0_g1	3.52	27.19	-2.9259	down	0.0010674	0.032894	non-functional pseudokinase ZED1-like [Camellia sinensis]	-	-	-	-	-	-	-
TR41654_c0_g1	9.21	0	5.7186	up	0.001067	0.032885	protein NRT1/ PTR FAMILY 3.1-like [Camellia sinensis]	Protein NRT1/ PTR FAMILY 3.1 OS=Arabidopsis thaliana OX=3702 GN=NPF3.1 PE=2 SV=1	POT family	-	-	-	-	-
TR10414_c0_g2	4.11	26.87	-2.7251	down	0.0010668	0.032882	disease resistance protein RPM1-like [Camellia sinensis]	-	Leucine Rich repeats (2 copies)	-	-	-	-	-
TR10695_c0_g1	589.07	293.3	1.0064	up	0.0010657	0.032854	RNA cytidine acetyltransferase 2-like [Camellia sinensis]	RNA cytidine acetyltransferase 1 OS=Arabidopsis thaliana OX=3702 GN=At1g10490 PE=2 SV=2	GNAT acetyltransferase 2;Possible tRNA binding domain;Helicase;Helicase;Domain of unknown function (DUF1726);AAA domain	-	-	-	-	-
TR1498_c4_g1	2741.67	1188.35	1.2062	up	0.0010654	0.032846	L-type lectin-domain containing receptor kinase VIII.2-like [Camellia sinensis]	Probable L-type lectin-domain containing receptor kinase S.7 OS=Arabidopsis thaliana OX=3702 GN=LECRKS7 PE=2 SV=1	Legume lectin domain;Protein tyrosine kinase;Protein kinase domain	-	-	-	-	-
TR45606_c0_g1	0	9.44	-5.6816	down	0.0010639	0.032805	-	-	-	-	-	-	-	-
TR29359_c0_g2	0.31	13.02	-5.1825	down	0.0010634	0.032795	ankyrin repeat-containing protein BDA1-like [Camellia sinensis]	-	Domain of unknown function	-	-	-	-	-
TR12356_c0_g1	3.94	25.92	-2.7072	down	0.0010626	0.032773	rust resistance kinase Lr10-like [Camellia sinensis]	LEAF RUST 10 DISEASE-RESISTANCE LOCUS RECEPTOR-LIKE PROTEIN KINASE-like 2.4 OS=Arabidopsis thaliana OX=3702 GN=LRK10L-2.4 PE=3 SV=1	-	-	-	-	-	-
TR5395_c2_g1	1.34	18.69	-3.8075	down	0.0010623	0.032768	-	-	-	-	-	-	-	-
TR26627_c0_g1	28.66	5.43	2.4038	up	0.0010609	0.03273	-	-	-	-	-	-	-	-
TR139809_c0_g1	1.7	18.57	-3.4665	down	0.0010599	0.032701	putative disease resistance RPP13-like protein 1, partial [Camellia sinensis]	-	-	-	-	-	-	-
TR9066_c0_g1	940.87	470.15	1.0008	up	0.0010589	0.032678	nudix hydrolase 3 isoform X1 [Camellia sinensis]	Nudix hydrolase 3 OS=Arabidopsis thaliana OX=3702 GN=NUDT3 PE=1 SV=1	-	-	-	-	-	-
TR59746_c1_g2	15.98	0.97	4.061	up	0.0010583	0.032665	uncharacterized protein LOC114323031 [Camellia sinensis]	-	-	-	-	-	-	-
TR133677_c0_g1	5.06	38.5	-2.9054	down	0.0010576	0.03265	uncharacterized protein At4g06744-like [Camellia sinensis]	Uncharacterized protein At4g06744 OS=Arabidopsis thaliana OX=3702 GN=At4g06744 PE=2 SV=1	Leucine rich repeat;Leucine Rich repeats (2 copies)	-	-	-	-	-
TR26091_c1_g1	15.9	0.66	4.6245	up	0.0010577	0.03265	-	-	-	-	-	-	-	-
TR49162_c0_g1	6.03	31.53	-2.3908	down	0.0010563	0.032615	-	-	-	-	-	-	-	-
TR107_c1_g1	1.28	17.94	-3.7742	down	0.0010545	0.032563	-	-	-	-	-	-	-	-
TR21371_c0_g1	40.89	267.04	-2.707	down	0.0010529	0.032521	uncharacterized protein LOC114306938 [Camellia sinensis]|XP_028108062.1 uncharacterized protein LOC114306938 [Camellia sinensis]|XP_028108063.1 uncharacterized protein LOC114306938 [Camellia sinensis]|XP_028108065.1 uncharacterized protein LOC114306938 [Camellia sinensis]|XP_028108066.1 uncharacterized protein LOC114306938 [Camellia sinensis]	-	-	-	-	-	-	-
TR2571_c1_g1	152.03	338.64	-1.1545	down	0.001053	0.032521	serine decarboxylase-like [Camellia sinensis]	Serine decarboxylase OS=Arabidopsis thaliana OX=3702 GN=SDC PE=1 SV=1	-	-	-	-	-	-
TR3826_c2_g1	31.39	90.34	-1.5234	down	0.0010526	0.032518	-	-	-	-	-	-	-	-
TR19932_c0_g1	9.21	0	5.7174	up	0.0010518	0.032496	-	-	-	-	-	-	-	-
TR24191_c1_g1	9.25	0	5.7235	up	0.0010514	0.032487	-	-	-	-	-	-	-	-
TR4593_c0_g1	15.61	0.63	4.6204	up	0.0010509	0.032478	protein FAR-RED IMPAIRED RESPONSE 1-like [Camellia sinensis]	-	-	-	-	-	-	-
TR10507_c1_g1	1.01	16.47	-4.038	down	0.0010452	0.032308	-	-	-	-	-	-	-	-
TR23068_c0_g1	41.12	113.05	-1.4556	down	0.0010448	0.032299	LRR receptor-like serine/threonine-protein kinase GHR1 [Camellia sinensis]|XP_028052205.1 LRR receptor-like serine/threonine-protein kinase GHR1 [Camellia sinensis]	Probable LRR receptor-like serine/threonine-protein kinase At4g20940 OS=Arabidopsis thaliana OX=3702 GN=At4g20940 PE=1 SV=1	Leucine rich repeat;Leucine Rich repeats (2 copies);Protein tyrosine kinase;Protein kinase domain;Leucine Rich Repeat;Leucine rich repeat N-terminal domain;Leucine Rich repeat	-	-	-	-	-
TR55554_c0_g1	8.15	49.28	-2.5891	down	0.0010446	0.032298	chalcone synthase, partial [Camellia fraterna]	Chalcone synthase 2 OS=Camellia sinensis OX=4442 GN=CHS2 PE=2 SV=1	-	-	-	-	-	-
TR39726_c0_g1	2.33	23.34	-3.326	down	0.0010418	0.032215	-	-	-	-	-	-	-	-
TR4582_c0_g2	84.12	195.45	-1.2163	down	0.0010401	0.032174	scarecrow-like transcription factor PAT1 [Camellia sinensis]|XP_028051845.1 scarecrow-like transcription factor PAT1 [Camellia sinensis]	Scarecrow-like transcription factor PAT1 OS=Arabidopsis thaliana OX=3702 GN=PAT1 PE=2 SV=1	GRAS domain family	-	-	-	-	-
TR24674_c2_g1	43.58	8.23	2.407	up	0.0010402	0.032174	transcription factor bHLH162-like isoform X1 [Camellia sinensis]	Transcription factor bHLH162 OS=Arabidopsis thaliana OX=3702 GN=BHLH162 PE=1 SV=1	Helix-loop-helix DNA-binding domain	-	-	-	-	-
TR12561_c0_g1	307.69	146.99	1.0655	up	0.0010395	0.032161	uncharacterized protein LOC114287002 [Camellia sinensis]	-	-	-	-	-	-	-
TR4216_c0_g1	38.03	109.85	-1.5307	down	0.0010382	0.032124	Nuclear transcription factor Y subunit A-7 [Vitis vinifera]	Nuclear transcription factor Y subunit A-4 OS=Arabidopsis thaliana OX=3702 GN=NFYA4 PE=1 SV=1	-	-	-	-	-	-
TR145769_c0_g1	2.37	22.28	-3.2446	down	0.001037	0.032092	-	-	-	-	-	-	-	-
TR12599_c2_g1	0	9.58	-5.7	down	0.001036	0.032063	dnaJ homolog subfamily C member 17 [Cicer arietinum]	-	-	-	-	-	-	-
TR2689_c0_g1	66.49	765.94	-3.5255	down	0.001036	0.032063	receptor-like protein 7 [Camellia sinensis]	Receptor-like protein Cf-9 OS=Solanum pimpinellifolium OX=4084 GN=CF-9 PE=1 SV=1	Leucine rich repeat;Leucine Rich repeats (2 copies);Leucine Rich Repeat;Leucine rich repeat N-terminal domain;Leucine Rich repeat	-	-	-	-	-
TR11443_c0_g1	0	9.43	-5.6794	down	0.0010344	0.032026	-	-	-	-	-	-	-	-
TR13729_c0_g1	30.08	3.52	3.0984	up	0.0010345	0.032026	uncharacterized protein LOC114294511 [Camellia sinensis]	-	-	-	-	-	-	-
TR431_c5_g1	191.05	81.57	1.2264	up	0.0010326	0.031973	H/ACA ribonucleoprotein complex subunit 4-like [Camellia sinensis]	-	-	-	-	-	-	-
TR7445_c2_g1	295.66	144.67	1.0315	up	0.0010321	0.031963	pyrroline-5-carboxylate reductase [Camellia sinensis]	Pyrroline-5-carboxylate reductase OS=Pisum sativum OX=3888 GN=PROC PE=2 SV=1	Pyrroline-5-carboxylate reductase dimerisation;NADP oxidoreductase coenzyme F420-dependent	-	-	-	K00286|proC; pyrroline-5-carboxylate reductase [EC:1.5.1.2]	ko00330(Metabolism);ko01100(Metabolism);ko01110(Metabolism);ko01230(Metabolism)
TR43818_c0_g3	0.35	13.5	-5.2354	down	0.0010317	0.031953	-	-	-	-	-	-	-	-
TR24365_c0_g1	39.53	8.93	2.1498	up	0.0010311	0.031941	probable DNA-3-methyladenine glycosylase 2 [Camellia sinensis]	Putative glucose-6-phosphate 1-epimerase OS=Cenchrus ciliaris OX=35872 PE=2 SV=1	-	-	-	-	-	-
TR25738_c0_g2	17.75	1.6	3.4767	up	0.0010308	0.031935	-	-	-	-	-	-	-	-
TR40073_c0_g1	32.78	7.02	2.226	up	0.0010305	0.031929	trihelix transcription factor ASIL1-like [Camellia sinensis]	-	-	-	-	-	-	-
TR66148_c0_g1	6.54	35.49	-2.4307	down	0.0010295	0.031906	extra-large guanine nucleotide-binding protein 1-like [Camellia sinensis]|XP_028055647.1 extra-large guanine nucleotide-binding protein 1-like [Camellia sinensis]|XP_028055648.1 extra-large guanine nucleotide-binding protein 1-like [Camellia sinensis]	Extra-large guanine nucleotide-binding protein 1 OS=Arabidopsis thaliana OX=3702 GN=XLG1 PE=1 SV=2	G-protein alpha subunit	-	-	-	-	-
TR6647_c0_g1	28.87	88.39	-1.6139	down	0.0010288	0.031893	-	-	-	-	-	-	-	-
TR33164_c0_g1	9.55	0	5.7656	up	0.0010288	0.031893	uncharacterized protein LOC114262079 isoform X1 [Camellia sinensis]	-	-	-	-	-	-	-
TR6395_c0_g1	168.78	345.57	-1.0344	down	0.0010276	0.031863	putative uncharacterized protein DDB_G0270496 [Camellia sinensis]|XP_028076032.1 putative uncharacterized protein DDB_G0270496 [Camellia sinensis]	-	Apoptosis antagonizing transcription factor	-	-	-	-	-
TR54083_c1_g3	0.35	17.1	-5.5727	down	0.0010271	0.031852	transaldolase [Pyrenochaeta sp. DS3sAY3a]	-	Transaldolase/Fructose-6-phosphate aldolase	-	-	-	-	-
TR15364_c1_g1	110.58	246.35	-1.1541	down	0.0010268	0.031845	calmodulin-binding protein 60 A-like [Camellia sinensis]	Calmodulin-binding protein 60 A OS=Arabidopsis thaliana OX=3702 GN=CBP60A PE=2 SV=1	Calmodulin binding protein-like	-	-	-	-	-
TR25886_c0_g2	99.08	36.81	1.4297	up	0.0010259	0.031824	WD repeat-containing protein DWA2-like isoform X1 [Camellia sinensis]	WD repeat-containing protein DWA2 OS=Arabidopsis thaliana OX=3702 GN=DWA2 PE=1 SV=1	-	-	-	-	-	-
TR3748_c0_g1	12.9	0.3	5.2385	up	0.001026	0.031824	-	-	-	-	-	-	-	-
TR23982_c0_g1	0.62	16.89	-4.6941	down	0.0010256	0.03182	-	-	-	-	-	-	-	-
TR13837_c0_g2	0	9.76	-5.7289	down	0.0010254	0.031819	-	Presequence protease 1, chloroplastic/mitochondrial OS=Arabidopsis thaliana OX=3702 GN=PREP1 PE=1 SV=2	-	-	-	-	-	-
TR2353_c10_g1	28.34	83.88	-1.5666	down	0.0010249	0.031805	probable protein phosphatase 2C 63 [Camellia sinensis]	Probable protein phosphatase 2C 78 OS=Oryza sativa subsp. japonica OX=39947 GN=Os12g0580900 PE=2 SV=1	-	-	-	-	-	-
TR14271_c1_g1	0	9.46	-5.6834	down	0.0010222	0.031734	-	-	-	-	-	-	-	-
TR16507_c0_g1	38.1	7.54	2.3331	up	0.0010217	0.03173	gag-pol polyprotein [Populus deltoides]	-	-	-	-	-	-	-
TR187095_c0_g1	9.46	0	5.7577	up	0.0010219	0.03173	-	-	-	-	-	-	-	-
TR12728_c0_g1	14.51	61.61	-2.0838	down	0.0010201	0.031686	receptor-like protein kinase FERONIA [Camellia sinensis]	Receptor-like protein kinase FERONIA OS=Arabidopsis thaliana OX=3702 GN=FER PE=1 SV=1	Protein tyrosine kinase;Protein kinase domain	-	-	-	-	-
TR1788_c8_g1	338.24	162.61	1.057	up	0.0010198	0.031681	uncharacterized protein LOC114303625 isoform X2 [Camellia sinensis]	-	2OG-Fe(II) oxygenase superfamily	-	-	-	-	-
TR11891_c0_g1	16.02	0.94	4.0803	up	0.0010192	0.031665	PREDICTED: BAG-associated GRAM protein 1-like isoform X4 [Lupinus angustifolius]|OIV93254.1 hypothetical protein TanjilG_26009 [Lupinus angustifolius]	BAG-associated GRAM protein 1 OS=Arabidopsis thaliana OX=3702 GN=BAGP1 PE=1 SV=1	-	-	-	-	-	-
TR2120_c0_g1	26.69	200.43	-2.9112	down	0.0010183	0.031641	uncharacterized protein LOC114276124 [Camellia sinensis]|XP_028073693.1 uncharacterized protein LOC114276124 [Camellia sinensis]	-	Senescence regulator	-	-	-	-	-
TR109521_c0_g1	0	9.43	-5.6794	down	0.001018	0.031636	-	-	-	-	-	-	-	-
TR1435_c2_g1	107.56	297.29	-1.4655	down	0.0010178	0.031634	caffeoylshikimate esterase [Camellia sinensis]	Caffeoylshikimate esterase OS=Arabidopsis thaliana OX=3702 GN=CSE PE=1 SV=1	Serine aminopeptidase, S33;alpha/beta hydrolase fold;Alpha/beta hydrolase family;Serine aminopeptidase, S33	-	-	-	-	-
TR2766_c2_g1	73.27	186.8	-1.3515	down	0.0010164	0.031593	uncharacterized protein At3g28850-like [Camellia sinensis]	Uncharacterized protein At3g28850 OS=Arabidopsis thaliana OX=3702 GN=At3g28850 PE=4 SV=1	Glutaredoxin	-	-	-	-	-
TR83113_c0_g1	15.58	60.26	-1.9494	down	0.0010157	0.031575	DnaJ subfamily C member 2 [Gossypium arboreum]	Transcription factor RADIALIS OS=Antirrhinum majus OX=4151 GN=RAD PE=1 SV=1	-	-	-	-	-	-
TR27664_c0_g1	0.65	16.12	-4.6023	down	0.0010138	0.031519	non-specific lipid transfer protein GPI-anchored 2 [Camellia sinensis]	-	Probable lipid transfer;Protease inhibitor/seed storage/LTP family	-	-	-	-	-
TR29420_c2_g1	12.98	0.3	5.2495	up	0.0010126	0.031488	-	-	-	-	-	-	-	-
TR1547_c2_g1	323.91	160.62	1.0115	up	0.0010122	0.031478	leukocyte receptor cluster member 1-like [Camellia sinensis]	-	-	-	-	-	-	-
TR2130_c0_g2	1731.19	427.48	2.018	up	0.001012	0.031476	LOW QUALITY PROTEIN: acyltransferase-like protein At1g54570, chloroplastic [Camellia sinensis]	Acyltransferase-like protein At1g54570, chloroplastic OS=Arabidopsis thaliana OX=3702 GN=At1g54570 PE=1 SV=1	Serine aminopeptidase, S33;alpha/beta hydrolase fold;Alpha/beta hydrolase family;Diacylglycerol acyltransferase	-	-	-	-	-
TR9115_c0_g1	406.49	195.12	1.0592	up	0.0010113	0.031458	cold-resistant protein ICE1 [Camellia japonica]	Transcription factor ICE1 OS=Arabidopsis thaliana OX=3702 GN=SCRM PE=1 SV=1	Helix-loop-helix DNA-binding domain	-	-	-	-	-
TR879_c4_g1	3468.44	7775.03	-1.1646	down	0.00101	0.031422	uncharacterized protein LOC114295761 [Camellia sinensis]	-	Alpha galactosidase A	-	-	-	-	-
TR68982_c0_g2	9.45	0	5.7565	up	0.0010099	0.031422	uncharacterized protein LOC114292711 [Camellia sinensis]	-	zinc-binding in reverse transcriptase	-	-	-	-	-
TR36842_c0_g2	0	9.65	-5.7102	down	0.0010093	0.031411	-	-	-	-	-	-	-	-
TR25813_c0_g1	3.27	26.14	-2.9844	down	0.001009	0.031407	Transcription factor BEE like [Actinidia chinensis var. chinensis]	Transcription factor BEE 3 OS=Arabidopsis thaliana OX=3702 GN=BEE3 PE=2 SV=1	-	-	-	-	-	-
TR261322_c0_g1	0	9.99	-5.7607	down	0.0010088	0.031404	-	-	-	-	-	-	-	-
TR7374_c0_g1	35.2	128.84	-1.8704	down	0.0010087	0.031404	late embryogenesis abundant protein D-29-like isoform X2 [Camellia sinensis]	-	-	-	-	-	-	-
TR1285_c1_g1	0	9.7	-5.721	down	0.0010085	0.031403	-	-	-	-	-	-	-	-
TR267_c1_g1	9.4	0	5.7445	up	0.0010074	0.031371	-	-	-	-	-	-	-	-
TR84535_c0_g1	0.66	16.49	-4.6327	down	0.0010051	0.031309	-	-	-	-	-	-	-	-
TR7931_c0_g2	6.04	33.05	-2.4555	down	0.0010038	0.031273	TMV resistance protein N-like isoform X1 [Camellia sinensis]|XP_028114141.1 TMV resistance protein N-like isoform X1 [Camellia sinensis]|XP_028114142.1 TMV resistance protein N-like isoform X1 [Camellia sinensis]	-	-	-	-	-	-	-
TR29265_c0_g2	17.08	0.95	4.1645	up	0.0010037	0.031273	-	-	-	-	-	-	-	-
TR91983_c0_g1	0	9.5	-5.6898	down	0.0010031	0.031259	-	-	-	-	-	-	-	-
TR113865_c0_g1	0	11.52	-5.9641	down	0.0010022	0.031235	ubiquinol-cytochrome c reductase cytochrome c1 subunit [Rhizoctonia solani AG-1 IB]	Cytochrome c1-2, heme protein, mitochondrial (Fragment) OS=Solanum tuberosum OX=4113 GN=CYCL PE=1 SV=1	Cytochrome C1 family	-	-	-	K00413|CYC1, CYT1, petC; ubiquinol-cytochrome c reductase cytochrome c1 subunit	ko00190(Metabolism);ko01100(Metabolism);ko02020(Environmental Information Processing);ko04260(Organismal Systems);ko04714(Organismal Systems)
TR7630_c0_g1	44.48	117.36	-1.4028	down	0.001002	0.031231	uncharacterized protein LOC114319562 [Camellia sinensis]	-	Methyladenine glycosylase	-	-	-	K01246|tag; DNA-3-methyladenine glycosylase I [EC:3.2.2.20]	ko03410(Genetic Information Processing)
TR6107_c4_g1	9.53	0	5.7636	up	0.0010014	0.031217	-	-	-	-	-	-	-	-
TR51491_c0_g2	9.98	0	5.8363	up	0.00099999	0.03118	-	50S ribosomal protein L14, chloroplastic OS=Nandina domestica OX=41776 GN=rpl14 PE=3 SV=1	-	-	-	-	-	-
TR27266_c0_g1	14.92	54.45	-1.8663	down	0.00099938	0.031169	-	-	-	-	-	-	-	-
TR1049_c0_g1	235.47	486.04	-1.0451	down	0.00099952	0.031169	vesicle-associated protein 2-2-like [Camellia sinensis]	Vesicle-associated protein 2-2 OS=Arabidopsis thaliana OX=3702 GN=PVA22 PE=1 SV=1	MSP (Major sperm protein) domain	-	-	-	-	-
TR33271_c0_g1	3.25	25.99	-2.9841	down	0.00099804	0.031131	thermospermine synthase ACAULIS5 [Camellia sinensis]	Thermospermine synthase ACAULIS5 OS=Arabidopsis thaliana OX=3702 GN=ACL5 PE=1 SV=1	Spermine/spermidine synthase domain;Spermidine synthase tetramerisation domain	-	-	-	-	-
TR28087_c0_g1	15.42	0.62	4.6115	up	0.00099794	0.031131	disease resistance protein At4g27190-like isoform X2 [Camellia sinensis]	-	-	-	-	-	-	-
TR5305_c0_g2	116.32	31.17	1.8969	up	0.00099768	0.031128	expansin-A8-like [Camellia sinensis]	Expansin-A8 OS=Arabidopsis thaliana OX=3702 GN=EXPA8 PE=2 SV=1	-	-	-	-	-	-
TR2881_c0_g1	1930.6	935.95	1.0445	up	0.0009974	0.031123	LOW QUALITY PROTEIN: isoflavone reductase-like protein [Camellia sinensis]	Isoflavone reductase-like protein OS=Olea europaea OX=4146 PE=1 SV=1	NmrA-like family	-	-	-	-	-
TR6895_c0_g1	22.44	2.15	3.3614	up	0.0009969	0.031123	uncharacterized protein LOC114301587 isoform X1 [Camellia sinensis]	-	-	-	-	-	-	-
TR105565_c0_g1	9.45	0	5.7556	up	0.00099742	0.031123	-	-	-	-	-	-	-	-
TR50113_c0_g1	10.04	0	5.8402	up	0.00099737	0.031123	-	-	-	-	-	-	-	-
TR68920_c1_g1	3.64	27.52	-2.9151	down	0.00099523	0.031074	glucan endo-1,3-beta-glucosidase, basic isoform-like [Camellia sinensis]	Glucan endo-1,3-beta-glucosidase, basic isoform OS=Prunus persica OX=3760 GN=GNS1 PE=3 SV=1	-	-	-	-	-	-
TR71502_c0_g1	7.06	36.38	-2.37	down	0.00099519	0.031074	L-type lectin-domain containing receptor kinase IX.1-like [Camellia sinensis]	L-type lectin-domain containing receptor kinase IX.2 OS=Arabidopsis thaliana OX=3702 GN=LECRK92 PE=1 SV=1	Legume lectin domain	-	-	-	-	-
TR24509_c0_g2	0.31	12.95	-5.1751	down	0.00099085	0.030945	-	-	-	-	-	-	-	-
TR22931_c0_g1	71.87	23.77	1.5975	up	0.00099052	0.030939	glucosidase 2 subunit beta-like [Camellia sinensis]	ATP-dependent RNA helicase-like protein DB10 OS=Nicotiana sylvestris OX=4096 PE=2 SV=1	-	-	-	-	-	-
TR65570_c0_g2	9.25	0	5.7238	up	0.00099023	0.030934	uncharacterized protein LOC114289549 [Camellia sinensis]	-	-	-	-	-	-	-
TR43741_c0_g1	9.86	0	5.8122	up	0.00099023	0.030934	uncharacterized protein LOC114312461 [Camellia sinensis]	-	-	-	-	-	-	-
TR12687_c0_g1	149.65	65.12	1.2	up	0.00098868	0.030897	gamma-tubulin complex component 3 [Camellia sinensis]	Gamma-tubulin complex component 3 OS=Arabidopsis thaliana OX=3702 GN=GCP3 PE=1 SV=1	Spc97 / Spc98 family	-	-	-	-	-
TR44534_c1_g1	12.58	0.32	5.2049	up	0.00098854	0.030896	-	-	-	-	-	-	-	-
TR94483_c0_g1	0.7	18.07	-4.7391	down	0.00098757	0.030874	-	-	-	-	-	-	-	-
TR58447_c0_g1	73.99	168	-1.1819	down	0.00098752	0.030874	rac-like GTP-binding protein ARAC8 isoform X1 [Camellia sinensis]	Rac-like GTP-binding protein 3 OS=Oryza sativa subsp. japonica OX=39947 GN=RAC3 PE=2 SV=1	Ras family	-	-	-	-	-
TR41828_c0_g1	0.35	13.32	-5.2157	down	0.00098677	0.03086	MDIS1-interacting receptor like kinase 2-like [Camellia sinensis]	MDIS1-interacting receptor like kinase 2 OS=Arabidopsis thaliana OX=3702 GN=MIK2 PE=1 SV=3	-	-	-	-	-	-
TR11472_c0_g1	9.49	0	5.7618	up	0.00098607	0.030842	-	-	-	-	-	-	-	-
TR23_c1_g1	69.17	174.63	-1.3372	down	0.00098532	0.030823	zinc finger CCCH domain-containing protein 55-like [Camellia sinensis]	Zinc finger CCCH domain-containing protein 53 OS=Oryza sativa subsp. japonica OX=39947 GN=Os07g0682400 PE=2 SV=1	Zinc finger C-x8-C-x5-C-x3-H type (and similar);RNA recognition motif. (a.k.a. RRM, RBD, or RNP domain)	-	-	-	-	-
TR1379_c0_g1	195.94	86.85	1.1746	up	0.00098492	0.030814	uncharacterized protein LOC114274032 isoform X1 [Camellia sinensis]	-	DTW domain	-	-	-	-	-
TR781_c0_g1	25.85	84.12	-1.7021	down	0.00098387	0.030785	-	-	-	-	-	-	-	-
TR10818_c2_g1	286.57	120.01	1.2572	up	0.0009836	0.03078	MADS-box transcription factor 6 isoform X1 [Camellia sinensis]|XP_028117321.1 MADS-box transcription factor 6 isoform X2 [Camellia sinensis]|XP_028117322.1 MADS-box transcription factor 6 isoform X3 [Camellia sinensis]|AFW15784.1 Agl6 [Camellia japonica]	MADS-box transcription factor 6 OS=Oryza sativa subsp. japonica OX=39947 GN=MADS6 PE=1 SV=1	K-box region;SRF-type transcription factor (DNA-binding and dimerisation domain)	-	-	-	-	-
TR10248_c0_g1	10.04	0	5.8442	up	0.00098341	0.030778	-	-	-	-	-	-	-	-
TR3433_c10_g1	0	10.16	-5.7866	down	0.00098248	0.030753	-	-	-	-	-	-	-	-
TR12612_c0_g2	0	10.05	-5.7688	down	0.00098221	0.030748	hypothetical protein POPTR_010G117200 [Populus trichocarpa]	Sec-independent protein translocase protein TATC, chloroplastic OS=Pisum sativum OX=3888 GN=TATC PE=1 SV=1	-	-	-	-	-	-
TR3684_c3_g1	20.13	76.73	-1.9335	down	0.00098195	0.030744	1-phenyethanol synthase 1 [Camellia sinensis]	Dihydroflavonol 4-reductase OS=Dianthus caryophyllus OX=3570 GN=A PE=2 SV=1	-	-	-	-	-	-
TR16282_c0_g1	9.61	43.74	-2.1826	down	0.00097996	0.030685	-	-	-	-	-	-	-	-
TR100312_c0_g1	0	9.56	-5.698	down	0.00097936	0.030671	uncharacterized protein LOC114309698 [Camellia sinensis]	-	-	-	-	-	-	-
TR140598_c0_g1	9.28	0	5.7277	up	0.0009786	0.030651	-	-	-	-	-	-	-	-
TR1795_c8_g1	38.09	107.81	-1.5014	down	0.00097835	0.030647	pentatricopeptide repeat-containing protein At2g17033 [Camellia sinensis]	Pentatricopeptide repeat-containing protein At2g17033 OS=Arabidopsis thaliana OX=3702 GN=At2g17033 PE=2 SV=1	PPR repeat;PPR repeat family	-	-	-	-	-
TR34502_c0_g1	16.32	0.95	4.0967	up	0.00097813	0.030643	E3 ubiquitin-protein ligase RMA1H1-like [Camellia sinensis]	E3 ubiquitin-protein ligase RMA1H1 OS=Capsicum annuum OX=4072 GN=RMA1H1 PE=1 SV=1	-	-	-	-	-	-
TR33860_c0_g1	80.92	858.88	-3.4075	down	0.00097757	0.03063	protein TIFY 9-like [Camellia sinensis]	Protein TIFY 9 OS=Arabidopsis thaliana OX=3702 GN=TIFY9 PE=1 SV=1	tify domain;Divergent CCT motif	-	-	-	K13464|JAZ; jasmonate ZIM domain-containing protein	ko04075(Environmental Information Processing)
TR209177_c0_g1	10.55	0	5.9137	up	0.00097742	0.030629	-	-	-	-	-	-	-	-
TR8009_c0_g1	17.48	0.61	4.8024	up	0.0009756	0.03058	-	-	-	-	-	-	-	-
TR283_c2_g1	12.81	48.87	-1.9356	down	0.00097544	0.030578	-	-	-	-	-	-	-	-
TR9134_c0_g2	0	118.53	-9.3304	down	0.00097477	0.030561	Endoglucanase-4 [Rhizoctonia solani]	-	Glycosyl hydrolase family 61	-	-	-	-	-
TR26904_c0_g3	19.77	1.95	3.3611	up	0.0009742	0.030547	serine/threonine-protein kinase Aurora-1-like [Camellia sinensis]	Serine/threonine-protein kinase Aurora-1 OS=Arabidopsis thaliana OX=3702 GN=AUR1 PE=1 SV=1	Protein kinase domain;Protein tyrosine kinase	-	-	-	-	-
TR1215_c0_g2	0	9.81	-5.7353	down	0.00097344	0.030527	-	-	-	-	-	-	-	-
TR7707_c0_g1	9.28	0	5.7279	up	0.00097308	0.03052	-	-	-	-	-	-	-	-
TR33249_c0_g1	15.57	55.38	-1.8361	down	0.00097285	0.030516	glucan endo-1,3-beta-glucosidase 4-like [Camellia sinensis]|XP_028074721.1 glucan endo-1,3-beta-glucosidase 4-like [Camellia sinensis]|XP_028074722.1 glucan endo-1,3-beta-glucosidase 4-like [Camellia sinensis]|XP_028074723.1 glucan endo-1,3-beta-glucosidase 4-like [Camellia sinensis]|XP_028074724.1 glucan endo-1,3-beta-glucosidase 4-like [Camellia sinensis]|XP_028074725.1 glucan endo-1,3-beta-glu…	Glucan endo-1,3-beta-glucosidase 4 OS=Arabidopsis thaliana OX=3702 GN=At3g13560 PE=2 SV=1	Glycosyl hydrolases family 17;X8 domain	-	-	-	K19892|GN4; glucan endo-1,3-beta-glucosidase 4 [EC:3.2.1.39]	ko00500(Metabolism);ko01100(Metabolism)
TR5467_c3_g1	0.94	17.86	-4.1942	down	0.00097133	0.030472	peroxidase 4-like [Camellia sinensis]	Peroxidase 4 OS=Vitis vinifera OX=29760 GN=GSVIVT00023967001 PE=1 SV=1	Peroxidase	-	-	-	-	-
TR5104_c0_g1	8.7	39.93	-2.1989	down	0.00097109	0.030469	-	-	-	-	-	-	-	-
TR4804_c1_g1	0.34	14.33	-5.3199	down	0.00097024	0.030446	-	-	-	-	-	-	-	-
TR38647_c0_g1	1.59	19.55	-3.5841	down	0.00096965	0.030431	-	-	-	-	-	-	-	-
TR11529_c0_g2	9.49	0	5.7573	up	0.00096961	0.030431	-	-	-	-	-	-	-	-
TR5939_c0_g2	0.35	13.16	-5.196	down	0.00096933	0.030429	aspartate aminotransferase, mitochondrial-like isoform X1 [Camellia sinensis]	-	-	-	-	-	-	-
TR27079_c0_g1	22.17	2.16	3.3415	up	0.00096906	0.030424	uncharacterized protein LOC114292711 [Camellia sinensis]	-	zinc-binding in reverse transcriptase	-	-	-	-	-
TR22544_c0_g2	9.92	0	5.8201	up	0.00096761	0.030382	putative disease resistance RPP13-like protein 1 [Camellia sinensis]	-	-	-	-	-	-	-
TR156299_c0_g1	9.31	0	5.7321	up	0.00096598	0.030335	-	-	-	-	-	-	-	-
TR4245_c1_g1	9.31	0	5.7321	up	0.00096598	0.030335	-	-	-	-	-	-	-	-
TR37612_c0_g1	1.05	17.93	-4.1406	down	0.00096517	0.030317	guanine nucleotide-binding protein subunit beta-like protein [Camellia sinensis]	Guanine nucleotide-binding protein subunit beta-like protein OS=Nicotiana tabacum OX=4097 GN=ARCA PE=2 SV=1	-	-	-	-	-	-
TR3422_c3_g1	1.97	20.17	-3.344	down	0.000965	0.030317	uncharacterized protein LOC114271582 [Camellia sinensis]	-	C1 domain;Phorbol esters/diacylglycerol binding domain (C1 domain)	-	-	-	-	-
TR63013_c0_g1	76.71	621.54	-3.0186	down	0.0009651	0.030317	salicylic acid-binding protein 2-like [Camellia sinensis]	Salicylic acid-binding protein 2 OS=Nicotiana tabacum OX=4097 GN=SABP2 PE=1 SV=1	alpha/beta hydrolase fold	-	-	-	-	-
TR48974_c0_g1	0.97	16.58	-4.0652	down	0.00096471	0.030314	putative F-box protein At3g52320 isoform X3 [Camellia sinensis]	-	-	-	-	-	-	-
TR7927_c0_g2	33.8	6.34	2.4165	up	0.00096463	0.030314	DUF724 domain-containing protein 2-like [Camellia sinensis]	-	Agenet domain	-	-	-	-	-
TR29397_c0_g1	0	9.47	-5.6856	down	0.00096345	0.030282	-	-	-	-	-	-	-	-
TR13783_c0_g1	0	9.6	-5.7038	down	0.00096268	0.030262	-	-	-	-	-	-	-	-
TR862_c4_g1	12.31	51.77	-2.0627	down	0.00096203	0.030248	TMV resistance protein N-like [Camellia sinensis]	Disease resistance-like protein DSC1 OS=Arabidopsis thaliana OX=3702 GN=DSC1 PE=1 SV=1	NB-ARC domain	-	-	-	-	-
TR4955_c0_g2	139.95	321.5	-1.2005	down	0.00096212	0.030248	disease resistance protein RPM1-like isoform X1 [Camellia sinensis]	Disease resistance protein RPM1 OS=Arabidopsis thaliana OX=3702 GN=RPM1 PE=1 SV=1	NB-ARC domain	-	-	-	K13457|RPM1, RPS3; disease resistance protein RPM1	ko04626(Organismal Systems)
TR28929_c0_g1	9.47	0	5.7587	up	0.00096199	0.030248	-	-	-	-	-	-	-	-
TR27973_c0_g1	20.61	1.31	3.9976	up	0.00095891	0.030162	Homocysteine S-methyltransferase [Actinidia chinensis var. chinensis]	-	Hsp20/alpha crystallin family	-	-	-	-	-
TR31993_c0_g2	9.26	0	5.7248	up	0.00095854	0.030154	-	-	-	-	-	-	-	-
TR2291_c0_g1	14.77	51.4	-1.8021	down	0.00095804	0.030146	EKC/KEOPS complex subunit like [Actinidia chinensis var. chinensis]	-	-	-	-	-	-	-
TR18622_c0_g1	17.1	1.29	3.7464	up	0.00095805	0.030146	-	-	-	-	-	-	-	-
TR41141_c0_g1	16.88	0.94	4.1545	up	0.00095814	0.030146	putative wall-associated receptor kinase-like 16 [Camellia sinensis]|XP_028090413.1 putative wall-associated receptor kinase-like 16 [Camellia sinensis]	Wall-associated receptor kinase 5 OS=Arabidopsis thaliana OX=3702 GN=WAK5 PE=2 SV=1	Protein kinase domain;Protein tyrosine kinase	-	-	-	-	-
TR14623_c2_g1	0	9.65	-5.71	down	0.00095734	0.030132	uncharacterized protein LOC114296823 isoform X2 [Camellia sinensis]	-	-	-	-	-	-	-
TR13702_c1_g1	25.32	3.12	3.0143	up	0.00095726	0.030132	-	-	-	-	-	-	-	-
TR4164_c1_g1	2495.94	196.82	3.6646	up	0.00095676	0.030121	protein SRC2 homolog isoform X1 [Camellia sinensis]	-	C2 domain	-	-	-	-	-
TR109017_c0_g1	31.55	4.58	2.7998	up	0.00095501	0.030073	-	-	-	-	-	-	-	-
TR1535_c1_g2	294.89	646.39	-1.1313	down	0.00095467	0.03007	probable phospholipid-transporting ATPase 12 isoform X3 [Camellia sinensis]	Putative phospholipid-transporting ATPase 9 OS=Arabidopsis thaliana OX=3702 GN=ALA9 PE=3 SV=1	Phospholipid-translocating ATPase N-terminal;E1-E2 ATPase	-	-	-	-	-
TR354_c2_g5	339.13	149.32	1.1826	up	0.00095478	0.03007	KH domain-containing protein At1g09660/At1g09670-like [Camellia sinensis]	KH domain-containing protein At1g09660/At1g09670 OS=Arabidopsis thaliana OX=3702 GN=At1g09660/At1g09670 PE=2 SV=1	-	-	-	-	-	-
TR286_c10_g1	0	10.48	-5.8338	down	0.00095445	0.030067	-	-	-	-	-	-	-	-
TR17021_c0_g1	0	9.69	-5.7192	down	0.00095387	0.030052	uncharacterized protein LOC114314424 [Camellia sinensis]	-	-	-	-	-	-	-
TR6370_c0_g1	96.22	28.6	1.7524	up	0.00095359	0.030048	NAD kinase 2, chloroplastic-like isoform X1 [Camellia sinensis]	NAD kinase 2, chloroplastic OS=Arabidopsis thaliana OX=3702 GN=NADK2 PE=1 SV=1	-	-	-	-	-	-
TR8132_c3_g1	295.71	144.69	1.0313	up	0.00095302	0.030034	uncharacterized protein LOC114270777 [Camellia sinensis]	-	Cytochrome oxidase complex assembly protein 1	-	-	-	-	-
TR115840_c0_g2	9.27	0	5.7267	up	0.00095287	0.030032	protein ALP1-like isoform X1 [Camellia sinensis]|XP_028102881.1 protein ALP1-like isoform X1 [Camellia sinensis]	-	-	-	-	-	-	-
TR1345_c3_g1	785.16	1592.83	-1.0203	down	0.00095258	0.030027	transcription factor bHLH144 [Camellia sinensis]	Transcription factor bHLH144 OS=Arabidopsis thaliana OX=3702 GN=BHLH144 PE=1 SV=1	-	-	-	-	-	-
TR30247_c4_g1	0	9.63	-5.708	down	0.0009511	0.029984	-	-	-	-	-	-	-	-
TR7735_c0_g1	19.92	62.85	-1.6567	down	0.00095102	0.029984	UDP-glycosyltransferase 90A1-like [Camellia sinensis]	UDP-glycosyltransferase 90A1 OS=Arabidopsis thaliana OX=3702 GN=UGT90A1 PE=2 SV=1	UDP-glucoronosyl and UDP-glucosyl transferase	-	-	-	-	-
TR28841_c0_g1	2.75	55.96	-4.3576	down	0.00094959	0.029944	hypothetical protein COCHEDRAFT_1092909, partial [Bipolaris maydis C5]	60S ribosomal protein L8 OS=Solanum lycopersicum OX=4081 GN=RPL8 PE=2 SV=1	Ribosomal Proteins L2, C-terminal domain;Ribosomal Proteins L2, RNA binding domain	metabolic process;peptide metabolic process;nitrogen compound metabolic process;biological_process;biosynthetic process;macromolecule biosynthetic process;cellular process;gene expression;protein metabolic process;cellular nitrogen compound metabolic process;cellular macromolecule biosynthetic process;peptide biosynthetic process;macromolecule metabolic process;cellular amide metabolic process;am…	molecular_function;structural molecule activity;structural constituent of ribosome	intracellular;cellular_component;ribonucleoprotein complex;cell;cytoplasm;protein-containing complex;organelle;non-membrane-bounded organelle;intracellular organelle;intracellular non-membrane-bounded organelle;intracellular part;cytoplasmic part;cell part;ribosome	K02938|RP-L8e, RPL8; large subunit ribosomal protein L8e	ko03010(Genetic Information Processing)
TR32227_c0_g1	9.39	0	5.7431	up	0.00094926	0.029937	-	-	-	-	-	-	-	-
TR53137_c0_g1	10.8	0	5.9511	up	0.00094875	0.029925	-	-	-	-	-	-	-	-
TR890_c2_g1	366.82	911.11	-1.3126	down	0.00094768	0.029895	putative disease resistance RPP13-like protein 1 [Camellia sinensis]	Putative disease resistance RPP13-like protein 1 OS=Arabidopsis thaliana OX=3702 GN=RPPL1 PE=3 SV=1	Leucine Rich repeats (2 copies)	-	-	-	-	-
TR176334_c0_g2	0.35	13.03	-5.1827	down	0.00094722	0.029884	putative disease resistance RPP13-like protein 1 [Camellia sinensis]	Putative disease resistance RPP13-like protein 1 OS=Arabidopsis thaliana OX=3702 GN=RPPL1 PE=3 SV=1	-	-	-	-	-	-
TR18415_c0_g1	0	9.6	-5.704	down	0.00094699	0.029881	-	-	-	-	-	-	-	-
TR80668_c0_g1	9.26	0	5.7258	up	0.00094674	0.029877	uncharacterized protein LOC114317910 [Camellia sinensis]	-	Domain of unknown function (DUF4220)	-	-	-	-	-
TR23383_c0_g1	0	9.51	-5.6916	down	0.00094661	0.029876	-	-	-	-	-	-	-	-
TR51422_c0_g2	0	9.51	-5.6916	down	0.00094661	0.029876	-	-	-	-	-	-	-	-
TR6951_c0_g1	88.17	216.88	-1.2987	down	0.00094627	0.029873	uncharacterized protein LOC114320304 [Camellia sinensis]	-	NAD(P)H-binding;NmrA-like family;Complex I intermediate-associated protein 30 (CIA30);NAD dependent epimerase/dehydratase family	-	-	-	-	-
TR6207_c0_g1	123.47	50.1	1.3004	up	0.0009454	0.02985	Zinc finger protein VAR3, chloroplastic [Vitis vinifera]	-	Zn-finger in Ran binding protein and others	-	-	-	-	-
TR42924_c0_g1	0	9.95	-5.7578	down	0.0009447	0.029831	-	-	-	-	-	-	-	-
TR881_c4_g1	507.65	187.62	1.4366	up	0.00094316	0.02979	uncharacterized protein LOC114302135 [Camellia sinensis]	-	-	-	-	-	-	-
TR9243_c0_g1	18.67	1.59	3.5541	up	0.00094327	0.02979	-	-	-	-	-	-	-	-
TR73469_c0_g1	12.9	0.33	5.2413	up	0.00094208	0.02976	uncharacterized protein LOC114299467 isoform X3 [Camellia sinensis]	-	-	-	-	-	-	-
TR2374_c6_g1	0	9.55	-5.6959	down	0.00094173	0.029753	transcription factor Pur-alpha 1-like [Camellia sinensis]	-	-	-	-	-	-	-
TR818_c16_g3	69.09	2.12	5.0097	up	0.00094119	0.029739	PREDICTED: uncharacterized protein LOC107807822 isoform X2 [Nicotiana tabacum]	-	Domain of unknown function (DUF4283)	-	-	-	-	-
TR1769_c1_g1	37.02	8.24	2.1666	up	0.0009408	0.029731	-	-	-	-	-	-	-	-
TR2816_c6_g1	12.92	0.32	5.2439	up	0.00094049	0.029724	-	-	-	-	-	-	-	-
TR127270_c0_g1	9.57	0	5.7726	up	0.00094024	0.02972	-	-	-	-	-	-	-	-
TR4103_c6_g1	0	9.57	-5.7	down	0.00094008	0.029719	-	-	-	-	-	-	-	-
TR29896_c1_g1	1.65	19.9	-3.5855	down	0.00093734	0.02964	UDP-glycosyltransferase 73C3-like isoform X1 [Camellia sinensis]|XP_028066243.1 UDP-glycosyltransferase 73C3-like isoform X1 [Camellia sinensis]|XP_028066244.1 UDP-glycosyltransferase 73C3-like isoform X1 [Camellia sinensis]|XP_028066246.1 UDP-glycosyltransferase 73C3-like isoform X1 [Camellia sinensis]|XP_028066247.1 UDP-glycosyltransferase 73C3-like isoform X1 [Camellia sinensis]|XP_028066248.1…	UDP-glycosyltransferase 73C6 OS=Arabidopsis thaliana OX=3702 GN=UGT73C6 PE=2 SV=1	-	-	-	-	-	-
TR112463_c0_g1	198.38	86.55	1.1962	up	0.00093702	0.029634	post-GPI attachment to proteins factor 3 isoform X1 [Olea europaea var. sylvestris]	-	Per1-like family	-	-	-	-	-
TR31046_c0_g1	0	11.95	-6.0233	down	0.0009362	0.029611	hypothetical protein SNOG_15007 [Parastagonospora nodorum SN15]|EAT77550.1 hypothetical protein SNOG_15007 [Parastagonospora nodorum SN15]	-	CFEM domain	-	-	-	-	-
TR52610_c0_g1	0	9.49	-5.6877	down	0.00093563	0.029597	probable carboxylesterase 15 [Camellia sinensis]	Probable carboxylesterase 15 OS=Arabidopsis thaliana OX=3702 GN=CXE15 PE=2 SV=1	alpha/beta hydrolase fold	-	-	-	-	-
TR68833_c0_g1	0	9.49	-5.6877	down	0.00093563	0.029597	protein FORGETTER 1-like isoform X2 [Camellia sinensis]	Protein FORGETTER 1 OS=Arabidopsis thaliana OX=3702 GN=FGT1 PE=1 SV=1	-	-	-	-	-	-
TR268381_c0_g1	0	9.76	-5.7293	down	0.00093507	0.029593	uncharacterized protein LOC114291041 [Camellia sinensis]	-	-	-	-	-	-	-
TR19511_c0_g1	0	9.54	-5.6957	down	0.00093525	0.029593	-	-	-	-	-	-	-	-
TR89810_c0_g1	0	9.54	-5.6957	down	0.00093525	0.029593	-	-	-	-	-	-	-	-
TR169957_c0_g1	9.37	0	5.7413	up	0.0009341	0.029567	hypothetical protein AQUCO_04100168v1 [Aquilegia coerulea]	-	F-box domain;F-box-like;Protein of unknown function (DUF295)	-	-	-	-	-
TR11702_c0_g1	8.7	41.72	-2.2632	down	0.00093304	0.029538	serine/threonine-protein phosphatase 7 long form homolog [Camellia sinensis]	-	-	-	-	-	-	-
TR1768_c1_g1	19.02	62.78	-1.7234	down	0.00093307	0.029538	uncharacterized protein LOC114286274 [Camellia sinensis]	-	-	-	-	-	-	-
TR81758_c0_g1	10.02	0	5.8411	up	0.00093122	0.029487	-	-	-	-	-	-	-	-
TR111626_c0_g1	9.48	0	5.7606	up	0.00093053	0.029473	transcription factor MYB41 [Camellia sinensis]	Transcription factor MYB41 OS=Arabidopsis thaliana OX=3702 GN=MYB17 PE=1 SV=1	Myb-like DNA-binding domain;Myb-like DNA-binding domain	-	-	-	-	-
TR17052_c0_g1	2.34	22.19	-3.2496	down	0.00092856	0.029414	methylenetetrahydrofolate reductase 2-like [Camellia sinensis]	Methylenetetrahydrofolate reductase 2 OS=Arabidopsis thaliana OX=3702 GN=MTHFR2 PE=1 SV=2	-	-	-	-	-	-
TR7366_c0_g2	352.76	164.42	1.1023	up	0.00092806	0.029402	uncharacterized protein LOC114265904 [Camellia sinensis]	-	Rhodanese-like domain	-	-	-	-	-
TR8333_c0_g1	1.74	21.82	-3.679	down	0.00092669	0.029362	-	-	-	-	-	-	-	-
TR11899_c0_g1	0	9.59	-5.7018	down	0.00092612	0.029348	hypothetical protein BRARA_C03571 [Brassica rapa]	Ribosome biogenesis protein BRX1 homolog 1 OS=Arabidopsis thaliana OX=3702 GN=BRIX1-1 PE=2 SV=1	-	-	-	-	-	-
TR4885_c1_g2	0	10.49	-5.8328	down	0.00092527	0.029325	putative receptor-like protein kinase At3g47110 [Camellia sinensis]	-	-	-	-	-	-	-
TR25183_c1_g1	9.79	0	5.8023	up	0.00092506	0.029322	protein argonaute MEL1-like isoform X2 [Camellia sinensis]	Protein argonaute MEL1 OS=Oryza sativa subsp. japonica OX=39947 GN=MEL1 PE=2 SV=1	-	-	-	-	-	-
TR11856_c0_g1	96.86	260.57	-1.4292	down	0.00092456	0.029318	uncharacterized protein LOC114323022 [Camellia sinensis]	-	Asp/Glu/Hydantoin racemase	-	-	-	-	-
TR2413_c0_g3	1098.48	476.14	1.206	up	0.0009248	0.029318	calnexin homolog [Camellia sinensis]	Calnexin homolog OS=Helianthus tuberosus OX=4233 PE=2 SV=1	Calreticulin family	-	-	-	-	-
TR14383_c0_g1	137.42	55.94	1.2973	up	0.00092471	0.029318	F-box protein At2g32560-like [Camellia sinensis]	F-box protein At2g26850 OS=Arabidopsis thaliana OX=3702 GN=At2g26850 PE=2 SV=1	F-box domain	-	-	-	-	-
TR10807_c0_g1	262.31	37.13	2.8191	up	0.0009244	0.029318	probable 2-oxoglutarate-dependent dioxygenase AOP1 [Camellia sinensis]	Probable 2-oxoglutarate-dependent dioxygenase AOP1.2 OS=Arabidopsis thaliana OX=3702 GN=AOP1.2 PE=2 SV=1	2OG-Fe(II) oxygenase superfamily;non-haem dioxygenase in morphine synthesis N-terminal	-	-	-	-	-
TR1717_c0_g1	342.88	1517.37	-2.1456	down	0.00092415	0.029317	scarecrow-like protein 33 [Camellia sinensis]	Scarecrow-like protein 14 OS=Arabidopsis thaliana OX=3702 GN=SCL14 PE=2 SV=2	GRAS domain family	-	-	-	-	-
TR123812_c0_g1	19.09	1.89	3.3301	up	0.00092419	0.029317	probable serine/threonine-protein kinase PBL7 [Camellia sinensis]	Probable serine/threonine-protein kinase PBL7 OS=Arabidopsis thaliana OX=3702 GN=PBL7 PE=1 SV=1	Protein tyrosine kinase;Protein kinase domain;Phosphotransferase enzyme family	-	-	-	-	-
TR48340_c0_g2	0	9.62	-5.7059	down	0.00092368	0.02931	-	-	-	-	-	-	-	-
TR33196_c0_g1	0.62	17.15	-4.714	down	0.00092371	0.02931	branched-chain-amino-acid aminotransferase 2, chloroplastic-like isoform X1 [Camellia sinensis]	-	-	-	-	-	-	-
TR11058_c0_g3	37.98	7.7	2.3099	up	0.00092375	0.02931	-	-	-	-	-	-	-	-
TR49662_c0_g1	0	11.33	-5.9466	down	0.00092154	0.029251	lytic polysaccharide monooxygenase [Bipolaris zeicola 26-R-13]|XP_014553921.1 lytic polysaccharide monooxygenase [Bipolaris victoriae FI3]|EUC29084.1 lytic polysaccharide monooxygenase [Bipolaris zeicola 26-R-13]|EUN24346.1 lytic polysaccharide monooxygenase [Bipolaris victoriae FI3]	-	Glycosyl hydrolase family 61	metabolic process;biological_process;oxidation-reduction process	molecular_function;catalytic activity;oxidoreductase activity;monooxygenase activity	-	-	-
TR93125_c0_g1	0.31	13.57	-5.2426	down	0.00092154	0.029251	-	-	-	-	-	-	-	-
TR196791_c0_g1	0	9.53	-5.6938	down	0.00092095	0.029244	uncharacterized protein LOC111986769 [Quercus suber]	-	Retrotransposon gag protein	-	-	-	-	-
TR47566_c0_g1	0	9.5	-5.6897	down	0.00091945	0.0292	uncharacterized protein LOC114267199 [Camellia sinensis]	DNA damage-binding protein 1 OS=Solanum cheesmaniae OX=142759 GN=DDB1 PE=3 SV=1	-	-	-	-	-	-
TR2339_c20_g1	0	9.53	-5.6937	down	0.00091909	0.029192	-	-	-	-	-	-	-	-
TR40489_c0_g1	19.38	1.57	3.6157	up	0.000918	0.029161	E3 ubiquitin-protein ligase RHA1B-like [Camellia sinensis]	E3 ubiquitin-protein ligase RHA2A OS=Arabidopsis thaliana OX=3702 GN=RHA2A PE=1 SV=1	Ring finger domain;RING-like zinc finger;RING-H2 zinc finger domain;Zinc finger, C3HC4 type (RING finger)	-	-	-	-	-
TR34745_c0_g1	16.28	0.97	4.0881	up	0.00091727	0.029142	anthranilate phosphoribosyltransferase, chloroplastic-like isoform X1 [Camellia sinensis]	-	-	-	-	-	-	-
TR21635_c0_g1	16.42	55.26	-1.7531	down	0.00091632	0.029115	uncharacterized protein LOC114257390 [Camellia sinensis]	-	-	-	-	-	-	-
TR23798_c0_g1	0.31	13.35	-5.2187	down	0.00091581	0.029102	-	-	-	-	-	-	-	-
TR42964_c0_g1	4.3	27.6	-2.6782	down	0.0009155	0.029096	G-type lectin S-receptor-like serine/threonine-protein kinase LECRK3 [Camellia sinensis]	G-type lectin S-receptor-like serine/threonine-protein kinase LECRK1 OS=Oryza sativa subsp. japonica OX=39947 GN=LECRK1 PE=2 SV=1	D-mannose binding lectin	-	-	-	-	-
TR73313_c0_g1	0	9.56	-5.6979	down	0.00091465	0.029084	-	-	-	-	-	-	-	-
TR30304_c0_g1	127.73	985.71	-2.9482	down	0.00091501	0.029084	probable mannitol dehydrogenase [Camellia sinensis]	Probable mannitol dehydrogenase OS=Fragaria ananassa OX=3747 GN=CAD PE=2 SV=1	Alcohol dehydrogenase GroES-like domain;Zinc-binding dehydrogenase;D-isomer specific 2-hydroxyacid dehydrogenase, NAD binding domain	-	-	-	-	-
TR1988_c0_g1	103.5	34.78	1.5711	up	0.00091485	0.029084	GDSL esterase/lipase At4g10955-like [Camellia sinensis]|XP_028057242.1 GDSL esterase/lipase At4g10955-like [Camellia sinensis]|XP_028057243.1 GDSL esterase/lipase At4g10955-like [Camellia sinensis]	GDSL esterase/lipase At4g10955 OS=Arabidopsis thaliana OX=3702 GN=At4g10955 PE=2 SV=1	Lipase (class 3)	-	-	-	-	-
TR635_c3_g1	83.49	27.84	1.5874	up	0.00091496	0.029084	FCS-Like Zinc finger 5-like [Camellia sinensis]	-	zinc-finger of the FCS-type, C2-C2	-	-	-	-	-
TR162807_c0_g1	9.3	0	5.7309	up	0.00091479	0.029084	uncharacterized protein LOC114319533 [Camellia sinensis]	-	-	-	-	-	-	-
TR203757_c0_g1	5.04	33.01	-2.7151	down	0.0009125	0.029023	TMV resistance protein N-like [Camellia sinensis]	Disease resistance-like protein DSC1 OS=Arabidopsis thaliana OX=3702 GN=DSC1 PE=1 SV=1	NB-ARC domain;AAA ATPase domain	-	-	-	-	-
TR22747_c0_g1	0.66	15.79	-4.5711	down	0.00091044	0.028965	disease resistance protein At4g27190-like [Camellia sinensis]|XP_028096889.1 disease resistance protein At4g27190-like [Camellia sinensis]|XP_028096890.1 disease resistance protein At4g27190-like [Camellia sinensis]	-	-	-	-	-	-	-
TR14933_c1_g1	4.77	37.33	-2.98	down	0.00091008	0.028957	cysteine-rich receptor-like protein kinase 10 [Camellia sinensis]	Cysteine-rich receptor-like protein kinase 7 OS=Arabidopsis thaliana OX=3702 GN=CRK7 PE=2 SV=1	-	-	-	-	-	-
TR164_c3_g2	64.57	18.67	1.7946	up	0.00090994	0.028956	protein VTE6, chloroplastic [Camellia sinensis]	Protein VTE6, chloroplastic OS=Arabidopsis thaliana OX=3702 GN=VTE6 PE=1 SV=1	-	-	-	-	-	-
TR574_c2_g1	474.21	232.12	1.0308	up	0.00090892	0.028927	PREDICTED: GDSL esterase/lipase At5g14450-like [Daucus carota subsp. sativus]	GDSL esterase/lipase At3g27950 OS=Arabidopsis thaliana OX=3702 GN=At3g27950 PE=2 SV=1	GDSL-like Lipase/Acylhydrolase	-	-	-	-	-
TR1480_c3_g2	16.38	0.62	4.6968	up	0.00090869	0.028924	-	-	-	-	-	-	-	-
TR91869_c0_g1	0	11.49	-5.9606	down	0.00090748	0.028892	Protein translation factor SUI1 [Rhizoctonia solani AG-1 IB]|CEL51885.1 Protein translation factor SUI1 OS=Ashbya gossypii (strain ATCC 10895 / CBS 109,51 / FGSC 9923 / NRRL Y-1056) GN=SUI1A PE=3 SV=1 [Rhizoctonia solani AG-1 IB]	Protein translation factor SUI1 homolog 2 OS=Arabidopsis thaliana OX=3702 GN=At1g54290 PE=3 SV=1	Translation initiation factor SUI1	-	-	-	K03113|EIF1, SUI1; translation initiation factor 1	ko03013(Genetic Information Processing)
TR4856_c1_g1	123.47	276.84	-1.1642	down	0.00090757	0.028892	disease resistance protein RPM1-like [Camellia sinensis]	Disease resistance protein RPM1 OS=Arabidopsis thaliana OX=3702 GN=RPM1 PE=1 SV=1	NB-ARC domain;Leucine Rich repeats (2 copies);Leucine rich repeat	-	-	-	-	-
TR11151_c0_g1	2.66	21.76	-3.0301	down	0.00090713	0.028885	-	-	-	-	-	-	-	-
TR42205_c0_g1	22.74	2.8	3.0082	up	0.00090689	0.028881	PREDICTED: AUGMIN subunit 1 [Eucalyptus grandis]|KCW88003.1 hypothetical protein EUGRSUZ_A00412 [Eucalyptus grandis]	AUGMIN subunit 1 OS=Arabidopsis thaliana OX=3702 GN=AUG1 PE=1 SV=1	-	-	-	-	-	-
TR53928_c0_g1	1.35	24.78	-4.2095	down	0.00090466	0.028814	-	-	-	-	-	-	-	-
TR6450_c0_g1	778.96	354.19	1.1364	up	0.00090407	0.028799	uncharacterized protein LOC114266256 [Camellia sinensis]|XP_028062947.1 uncharacterized protein LOC114266256 [Camellia sinensis]	-	-	-	-	-	-	-
TR75923_c0_g1	0	9.59	-5.7019	down	0.0009039	0.028798	GID1c [Camellia sinensis]	Gibberellin receptor GID1C OS=Arabidopsis thaliana OX=3702 GN=GID1C PE=1 SV=1	-	-	-	-	-	-
TR3120_c1_g1	442.46	220.04	1.0082	up	0.00090393	0.028798	uncharacterized protein LOC114290015 isoform X1 [Camellia sinensis]	-	Transglutaminase-like superfamily	-	-	-	-	-
TR139147_c0_g1	10.01	40.84	-2.0279	down	0.000903	0.028776	pyruvate decarboxylase 1-like [Camellia sinensis]	Pyruvate decarboxylase 2 (Fragment) OS=Pisum sativum OX=3888 GN=PDC2 PE=2 SV=1	Thiamine pyrophosphate enzyme, central domain	-	-	-	-	-
TR24574_c0_g1	0	9.53	-5.6938	down	0.00090268	0.028769	putative disease resistance RPP13-like protein 1 [Camellia sinensis]	Putative disease resistance RPP13-like protein 1 OS=Arabidopsis thaliana OX=3702 GN=RPPL1 PE=3 SV=1	NB-ARC domain	-	-	-	-	-
TR88263_c0_g3	0	9.57	-5.6999	down	0.00090233	0.028762	-	-	-	-	-	-	-	-
TR87269_c0_g1	17.83	0.91	4.2525	up	0.0009022	0.028761	uncharacterized protein LOC114261684 [Camellia sinensis]	-	-	-	-	-	-	-
TR19661_c0_g1	18.11	66.7	-1.8779	down	0.00090135	0.028738	G-type lectin S-receptor-like serine/threonine-protein kinase At4g03230 isoform X1 [Camellia sinensis]	G-type lectin S-receptor-like serine/threonine-protein kinase At4g03230 OS=Arabidopsis thaliana OX=3702 GN=At4g03230 PE=3 SV=3	D-mannose binding lectin;S-locus glycoprotein domain;PAN-like domain;Wall-associated receptor kinase galacturonan-binding	-	-	-	-	-
TR33759_c0_g1	11.38	49.14	-2.1119	down	0.00090075	0.028722	serine/threonine-protein kinase STN8, chloroplastic [Camellia sinensis]	Serine/threonine-protein kinase STN8, chloroplastic OS=Arabidopsis thaliana OX=3702 GN=STN8 PE=2 SV=1	Protein kinase domain;Protein tyrosine kinase	-	-	-	-	-
TR28802_c0_g2	0.34	13.74	-5.2586	down	0.00090009	0.028705	-	-	-	-	-	-	-	-
TR6905_c2_g1	0	9.75	-5.7273	down	0.00089976	0.028698	-	-	-	-	-	-	-	-
TR22233_c0_g1	0	11.52	-5.964	down	0.0008988	0.028671	MBF1-domain-containing protein [Stagonospora sp. SRC1lsM3a]	-	Multiprotein bridging factor 1;Helix-turn-helix	-	molecular_function;nucleic acid binding;binding;organic cyclic compound binding;heterocyclic compound binding;DNA binding	-	-	-
TR9856_c0_g1	1.31	17.96	-3.7645	down	0.00089769	0.028643	hypothetical protein Ccrd_017637 [Cynara cardunculus var. scolymus]	-	-	-	-	-	-	-
TR4736_c6_g1	0	9.56	-5.6978	down	0.00089749	0.02864	polygalacturonase-like [Camellia sinensis]	Polygalacturonase OS=Prunus persica OX=3760 PE=2 SV=1	-	-	-	-	-	-
TR40892_c0_g1	0	10.18	-5.789	down	0.00089547	0.028579	-	-	-	-	-	-	-	-
TR38290_c2_g1	9.35	0	5.7382	up	0.00089498	0.028567	-	-	-	-	-	-	-	-
TR21615_c0_g1	60.64	153.1	-1.3366	down	0.00089395	0.028538	uncharacterized protein LOC114292320 [Camellia sinensis]	-	-	-	-	-	-	-
TR1644_c0_g1	14136.7	6184.6	1.1927	up	0.00089223	0.028498	uncharacterized protein LOC114313845 [Camellia sinensis]	-	Nodulin-like;Major Facilitator Superfamily	-	-	-	-	-
TR25563_c0_g1	121.44	46.32	1.3904	up	0.00089205	0.028495	ATP sulfurylase [Camellia sinensis]|AGG09239.1 ATP sulfurylase APS2 [Camellia sinensis]	ATP sulfurylase 1, chloroplastic OS=Arabidopsis thaliana OX=3702 GN=APS1 PE=1 SV=1	-	-	-	-	-	-
TR1320_c1_g1	134.47	581.16	-2.1111	down	0.0008918	0.028491	uncharacterized protein LOC114288810 [Camellia sinensis]	-	Domain of unknown function (DUF4283)	-	-	-	-	-
TR98921_c0_g1	1.71	19.98	-3.5685	down	0.00089149	0.028485	ankyrin repeat domain-containing protein 50-like [Camellia sinensis]	-	-	-	-	-	-	-
TR20401_c0_g1	3.72	25.3	-2.7754	down	0.00089056	0.028459	-	-	-	-	-	-	-	-
TR6605_c2_g1	188.71	80.67	1.2249	up	0.00088753	0.028366	acid phosphatase 1-like [Camellia sinensis]	Acid phosphatase 1 OS=Solanum lycopersicum OX=4081 GN=APS1 PE=2 SV=1	HAD superfamily, subfamily IIIB (Acid phosphatase)	-	-	-	-	-
TR4471_c1_g1	70.28	20.31	1.7909	up	0.00088697	0.028351	uncharacterized protein LOC114265517 isoform X2 [Camellia sinensis]	GTPase ERA1, chloroplastic OS=Zea mays OX=4577 GN=ERA1 PE=2 SV=1	KH-domain-like of EngA bacterial GTPase enzymes, C-terminal;50S ribosome-binding GTPase;Ferrous iron transport protein B;Dynamin family;50S ribosome-binding GTPase;Ferrous iron transport protein B	-	-	-	-	-
TR54778_c2_g1	0	9.82	-5.7373	down	0.00088672	0.028347	-	-	-	-	-	-	-	-
TR34728_c0_g1	37.34	7.93	2.2367	up	0.00088651	0.028344	Fanconi anemia group D2 protein homolog isoform X1 [Camellia sinensis]	-	Fanconi anaemia protein FancD2 nuclease	-	-	-	K10891|FANCD2; fanconi anemia group D2 protein	ko03460(Genetic Information Processing)
TR89619_c1_g1	0	9.73	-5.7253	down	0.00088618	0.028337	peptidyl-prolyl cis-trans isomerase [Jatropha curcas]|KDP27580.1 hypothetical protein JCGZ_19585 [Jatropha curcas]	Peptidyl-prolyl cis-trans isomerase 1 OS=Glycine max OX=3847 GN=Cyp1 PE=2 SV=1	-	-	-	-	-	-
TR106321_c0_g1	10.98	52.99	-2.272	down	0.00088579	0.028336	G-type lectin S-receptor-like serine/threonine-protein kinase At2g19130 [Camellia sinensis]	G-type lectin S-receptor-like serine/threonine-protein kinase At2g19130 OS=Arabidopsis thaliana OX=3702 GN=At2g19130 PE=2 SV=1	S-locus glycoprotein domain	-	-	-	-	-
TR11504_c0_g1	9.71	42.79	-2.142	down	0.00088589	0.028336	Retrovirus-related Pol polyprotein from transposon TNT 1-94 [Vitis vinifera]	Retrovirus-related Pol polyprotein from transposon TNT 1-94 OS=Nicotiana tabacum OX=4097 PE=2 SV=1	Reverse transcriptase (RNA-dependent DNA polymerase)	-	-	-	-	-
TR58333_c0_g1	24.97	73.06	-1.5489	down	0.00088605	0.028336	-	-	-	-	-	-	-	-
TR7701_c0_g1	241.55	112.6	1.1011	up	0.00088557	0.028336	putative SWI/SNF-related matrix-associated actin-dependent regulator of chromatin subfamily A member 3-like 1 isoform X4 [Camellia sinensis]	Putative SWI/SNF-related matrix-associated actin-dependent regulator of chromatin subfamily A member 3-like 1 OS=Arabidopsis thaliana OX=3702 GN=At5g05130 PE=2 SV=1	SNF2 family N-terminal domain;HIRAN domain;Helicase conserved C-terminal domain;Zinc finger, C3HC4 type (RING finger);Zinc finger, C3HC4 type (RING finger)	-	-	-	-	-
TR12696_c0_g1	16.86	0.61	4.7529	up	0.00088549	0.028336	-	-	-	-	-	-	-	-
TR24398_c0_g1	15.99	0.32	5.5485	up	0.00088523	0.028332	-	-	-	-	-	-	-	-
TR3860_c2_g1	66.72	18.45	1.8535	up	0.00088342	0.028281	cationic amino acid transporter 8, vacuolar [Camellia sinensis]	Cationic amino acid transporter 8, vacuolar OS=Arabidopsis thaliana OX=3702 GN=CAT8 PE=2 SV=1	Amino acid permease;Amino acid permease;C-terminus of AA_permease	-	-	-	-	-
TR1289_c2_g1	2.29	22.42	-3.2781	down	0.0008822	0.028246	-	-	-	-	-	-	-	-
TR23580_c0_g1	10.5	0	5.9033	up	0.00088171	0.028234	-	-	-	-	-	-	-	-
TR25199_c1_g1	0.7	18.03	-4.7386	down	0.00088081	0.028208	-	-	-	-	-	-	-	-
TR179973_c0_g1	9.36	0	5.7392	up	0.00088003	0.028187	uncharacterized protein LOC114310605 [Camellia sinensis]	-	gag-polypeptide of LTR copia-type;gag-polypeptide of LTR copia-type	-	-	-	-	-
TR12436_c0_g1	15.49	0.64	4.6105	up	0.00087961	0.028177	-	-	-	-	-	-	-	-
TR12047_c0_g1	40.44	7.32	2.4651	up	0.00087857	0.028147	UDP-glycosyltransferase 74E1-like [Camellia sinensis]	UDP-glycosyltransferase 74G1 OS=Stevia rebaudiana OX=55670 GN=UGT74G1 PE=1 SV=1	-	-	-	-	-	-
TR109772_c0_g1	9.37	0	5.7401	up	0.00087744	0.028115	RHOMBOID-like protein 2 [Camellia sinensis]	RHOMBOID-like protein 3 OS=Arabidopsis thaliana OX=3702 GN=RBL3 PE=2 SV=1	-	-	-	-	-	-
TR781_c11_g1	9.4	0	5.7452	up	0.00087622	0.028079	-	-	-	-	-	-	-	-
TR2634_c1_g2	10.23	46.74	-2.19	down	0.00087572	0.02807	hypothetical protein CISIN_1g044132mg [Citrus sinensis]	-	-	-	-	-	-	-
TR226_c3_g1	84.25	188.78	-1.1628	down	0.0008757	0.02807	Inter-alpha-trypsin inhibitor heavy chain like [Actinidia chinensis var. chinensis]	-	-	-	-	-	-	-
TR14989_c0_g1	69.85	16.83	2.0478	up	0.00087454	0.028043	cysteine-rich receptor-like protein kinase 10 [Camellia sinensis]	Cysteine-rich receptor-like protein kinase 10 OS=Arabidopsis thaliana OX=3702 GN=CRK10 PE=1 SV=3	Domain of unknown function (DUF3403)	-	-	-	-	-
TR103_c1_g3	2.99	25.05	-3.066	down	0.00087092	0.027935	-	-	-	-	-	-	-	-
TR51886_c0_g1	35.46	6.17	2.5345	up	0.00087033	0.027919	probable choline kinase 3 [Camellia sinensis]|XP_028060937.1 probable choline kinase 3 [Camellia sinensis]	Probable choline kinase 1 OS=Arabidopsis thaliana OX=3702 GN=CK1 PE=2 SV=1	-	-	-	-	K14156|CHK; choline/ethanolamine kinase [EC:2.7.1.32 2.7.1.82]	ko00564(Metabolism);ko01100(Metabolism)
TR572_c4_g2	14.52	53.88	-1.8969	down	0.0008695	0.027896	histidine kinase 2-like isoform X3 [Camellia sinensis]	Histidine kinase 2 OS=Arabidopsis thaliana OX=3702 GN=AHK2 PE=1 SV=1	CHASE domain;Histidine kinase-, DNA gyrase B-, and HSP90-like ATPase;His Kinase A (phospho-acceptor) domain;Response regulator receiver domain	-	-	-	K14489|AHK2_3_4; arabidopsis histidine kinase 2/3/4 (cytokinin receptor) [EC:2.7.13.3]	ko04075(Environmental Information Processing)
TR5418_c1_g2	39.72	0.95	5.382	up	0.00086939	0.027896	-	-	-	-	-	-	-	-
TR353_c10_g1	0	9.88	-5.7452	down	0.00086629	0.027806	-	-	-	-	-	-	-	-
TR5887_c1_g1	1.66	20.08	-3.5901	down	0.00086637	0.027806	uncharacterized protein LOC114303635 isoform X1 [Camellia sinensis]	-	-	-	-	-	-	-
TR389_c2_g1	146.76	63.27	1.2142	up	0.00086537	0.027785	aldehyde dehydrogenase [Camellia oleifera]	Aldehyde dehydrogenase family 2 member C4 OS=Arabidopsis thaliana OX=3702 GN=ALDH2C4 PE=1 SV=2	Aldehyde dehydrogenase family	-	-	-	K12355|REF1; coniferyl-aldehyde dehydrogenase [EC:1.2.1.68]	ko00940(Metabolism)
TR15084_c0_g1	0	10.34	-5.8127	down	0.00086421	0.027752	-	-	-	-	-	-	-	-
TR2077_c1_g1	172.35	356.94	-1.0502	down	0.00086422	0.027752	plant cysteine oxidase 1-like isoform X2 [Camellia sinensis]	Plant cysteine oxidase 1 OS=Arabidopsis thaliana OX=3702 GN=PCO1 PE=1 SV=1	PCO_ADO	-	-	-	-	-
TR7250_c0_g2	113.7	244.32	-1.1032	down	0.00086373	0.027743	glutathione gamma-glutamylcysteinyltransferase 1-like isoform X2 [Camellia sinensis]|XP_028122282.1 glutathione gamma-glutamylcysteinyltransferase 1-like isoform X2 [Camellia sinensis]	Glutathione gamma-glutamylcysteinyltransferase 1 OS=Lotus japonicus OX=34305 GN=PCS1 PE=2 SV=1	Phytochelatin synthase;Domain of unknown function (DUF1984);Domain of unknown function (DUF1984)	-	-	-	-	-
TR229_c0_g1	125.16	1102.02	-3.1385	down	0.00086331	0.027733	peroxidase P7-like isoform X1 [Camellia sinensis]	Peroxidase 4 OS=Vitis vinifera OX=29760 GN=GSVIVT00023967001 PE=1 SV=1	Peroxidase;Peroxidase	-	-	-	K00430|E1.11.1.7; peroxidase [EC:1.11.1.7]	ko00940(Metabolism);ko01100(Metabolism);ko01110(Metabolism)
TR131816_c0_g1	0	9.79	-5.733	down	0.00086305	0.027728	-	-	-	-	-	-	-	-
TR23292_c0_g1	1.63	21.01	-3.6744	down	0.00086238	0.02771	-	-	-	-	-	-	-	-
TR1506_c7_g1	537.58	1240.6	-1.2064	down	0.00086175	0.027697	cysteine-rich receptor-like protein kinase 10 isoform X1 [Camellia sinensis]	Cysteine-rich receptor-like protein kinase 25 OS=Arabidopsis thaliana OX=3702 GN=CRK25 PE=3 SV=1	Protein tyrosine kinase;Protein kinase domain;Salt stress response/antifungal	-	-	-	-	-
TR181372_c0_g1	1829.09	741.86	1.3021	up	0.00086187	0.027697	peroxidase 42-like [Camellia sinensis]	Peroxidase 42 OS=Arabidopsis thaliana OX=3702 GN=PER42 PE=1 SV=2	Peroxidase	-	-	-	-	-
TR93697_c0_g1	0.35	13.58	-5.2441	down	0.00086148	0.027696	-	-	-	-	-	-	-	-
TR3477_c0_g1	84.04	203.61	-1.2745	down	0.00086161	0.027696	UDP-glucuronic acid decarboxylase 2-like [Camellia sinensis]	UDP-glucuronic acid decarboxylase 2 OS=Arabidopsis thaliana OX=3702 GN=UXS2 PE=1 SV=1	-	-	-	-	-	-
TR75467_c0_g1	1.01	17.77	-4.149	down	0.00086078	0.027679	-	-	-	-	-	-	-	-
TR3204_c0_g2	2.91	23.72	-3.0073	down	0.00086086	0.027679	-	-	-	-	-	-	-	-
TR5844_c1_g1	0.94	17.7	-4.1812	down	0.00086046	0.027674	-	-	-	-	-	-	-	-
TR65757_c0_g1	22.63	1.96	3.5474	up	0.00086032	0.027673	-	-	-	-	-	-	-	-
TR136504_c0_g1	0.34	13.48	-5.2304	down	0.00085844	0.027615	-	-	-	-	-	-	-	-
TR11387_c0_g1	12.24	48.08	-1.971	down	0.0008582	0.027611	-	-	-	-	-	-	-	-
TR1644_c3_g1	350.3	169.86	1.0446	up	0.0008582	0.027611	-	-	-	-	-	-	-	-
TR42753_c0_g3	35.7	4.09	3.1207	up	0.0008574	0.027593	uncharacterized protein LOC114293456 [Camellia sinensis]	-	-	-	-	-	-	-
TR114930_c0_g1	9.67	0	5.787	up	0.00085662	0.027571	3-ketoacyl-CoA synthase 12-like [Camellia sinensis]	3-ketoacyl-CoA synthase 12 OS=Arabidopsis thaliana OX=3702 GN=KCS12 PE=2 SV=1	FAE1/Type III polyketide synthase-like protein;3-Oxoacyl-[acyl-carrier-protein (ACP)] synthase III C terminal;Chalcone and stilbene synthases, C-terminal domain	-	-	-	K15397|KCS; 3-ketoacyl-CoA synthase [EC:2.3.1.199]	ko00062(Metabolism);ko01100(Metabolism);ko01110(Metabolism);ko04626(Organismal Systems)
TR1414_c4_g1	232.96	75.69	1.622	up	0.00085636	0.027566	LOW QUALITY PROTEIN: uncharacterized transmembrane protein DDB_G0289901 [Camellia sinensis]	-	-	-	-	-	-	-
TR19908_c0_g2	29.4	5.43	2.4402	up	0.0008552	0.027532	G-type lectin S-receptor-like serine/threonine-protein kinase At4g27290 [Camellia sinensis]	G-type lectin S-receptor-like serine/threonine-protein kinase At4g27290 OS=Arabidopsis thaliana OX=3702 GN=At4g27290 PE=3 SV=4	D-mannose binding lectin	-	-	-	-	-
TR5462_c4_g1	2.32	21.34	-3.2001	down	0.00085458	0.027516	universal stress protein A-like protein [Camellia sinensis]	-	-	-	-	-	-	-
TR36410_c0_g1	0	9.77	-5.731	down	0.00085379	0.027495	nuclear pore complex protein NUP107-like, partial [Camellia sinensis]	Nuclear pore complex protein NUP107 OS=Arabidopsis thaliana OX=3702 GN=NUP107 PE=1 SV=1	-	-	-	-	-	-
TR36904_c2_g1	1.05	18.23	-4.1651	down	0.00085381	0.027495	-	-	-	-	-	-	-	-
TR1707_c8_g2	18.73	0.95	4.2953	up	0.00085362	0.027495	-	-	-	-	-	-	-	-
TR27286_c0_g1	1.02	18.18	-4.1701	down	0.00085343	0.027493	LOW QUALITY PROTEIN: brefeldin A-inhibited guanine nucleotide-exchange protein 2-like [Camellia sinensis]	Brefeldin A-inhibited guanine nucleotide-exchange protein 3 OS=Arabidopsis thaliana OX=3702 GN=BIG3 PE=1 SV=1	-	-	-	-	-	-
TR17942_c0_g1	42.54	137.3	-1.6898	down	0.00085279	0.027478	uncharacterized protein LOC114308452 [Camellia sinensis]	-	Auxin responsive protein;Auxin responsive protein	-	-	-	-	-
TR280_c4_g1	90.57	208.45	-1.2041	down	0.00085285	0.027478	-	-	-	-	-	-	-	-
TR25078_c1_g1	0	9.76	-5.7291	down	0.00085174	0.027449	-	-	-	-	-	-	-	-
TR3850_c0_g1	86.19	196.65	-1.1885	down	0.00085143	0.027446	uncharacterized protein LOC114322940 [Camellia sinensis]	-	-	-	-	-	-	-
TR62372_c0_g2	0	10.26	-5.8029	down	0.00085069	0.027426	-	-	-	-	-	-	-	-
TR121086_c0_g1	0	11.28	-5.9379	down	0.00084999	0.027407	Cytochrome P450 76A2 like [Actinidia chinensis var. chinensis]	Geraniol 8-hydroxylase OS=Catharanthus roseus OX=4058 GN=CYP76B6 PE=1 SV=1	Cytochrome P450	-	-	-	-	-
TR3780_c0_g1	13.52	190.06	-3.8099	down	0.00084966	0.0274	nudix hydrolase 18, mitochondrial-like [Camellia sinensis]	Nudix hydrolase 18, mitochondrial OS=Arabidopsis thaliana OX=3702 GN=NUDT18 PE=2 SV=1	-	-	-	-	-	-
TR49086_c1_g1	0.31	13.34	-5.2173	down	0.00084936	0.027394	-	-	-	-	-	-	-	-
TR3531_c0_g1	71.23	182.31	-1.357	down	0.00084879	0.027386	U-box domain-containing protein 30-like [Camellia sinensis]	U-box domain-containing protein 30 OS=Arabidopsis thaliana OX=3702 GN=PUB30 PE=2 SV=1	U-box domain	-	-	-	-	-
TR21202_c0_g2	11.21	0	6.0034	up	0.00084897	0.027386	-	-	-	-	-	-	-	-
TR102006_c0_g1	0	10.05	-5.7713	down	0.00084805	0.027366	-	-	-	-	-	-	-	-
TR34959_c0_g2	0	10.05	-5.7713	down	0.00084805	0.027366	UDP-glycosyltransferase 91C1-like [Camellia sinensis]	UDP-glycosyltransferase 72D1 OS=Arabidopsis thaliana OX=3702 GN=UGT72D1 PE=2 SV=1	-	-	-	-	-	-
TR39706_c0_g1	9.61	0	5.779	up	0.00084739	0.027351	-	-	-	-	-	-	-	-
TR19867_c0_g1	9.78	0	5.8014	up	0.0008472	0.027349	F-box protein At5g49610-like [Camellia sinensis]	F-box protein At5g49610 OS=Arabidopsis thaliana OX=3702 GN=At5g49610 PE=1 SV=1	-	-	-	-	-	-
TR2129_c0_g1	307.02	117.3	1.3889	up	0.00084531	0.027291	chloroplast stem-loop binding protein of 41 kDa b, chloroplastic isoform X1 [Camellia sinensis]	Chloroplast stem-loop binding protein of 41 kDa b, chloroplastic OS=Arabidopsis thaliana OX=3702 GN=CSP41B PE=1 SV=1	-	-	-	-	-	-
TR4520_c0_g1	35.76	219.64	-2.6165	down	0.00084387	0.027255	G-type lectin S-receptor-like serine/threonine-protein kinase At1g67520 [Camellia sinensis]	G-type lectin S-receptor-like serine/threonine-protein kinase At1g67520 OS=Arabidopsis thaliana OX=3702 GN=At1g67520 PE=2 SV=3	D-mannose binding lectin	-	-	-	-	-
TR23829_c1_g1	0	11.39	-5.9511	down	0.00084303	0.027235	-	-	-	-	-	-	-	-
TR22645_c0_g2	0	9.8	-5.7353	down	0.00084313	0.027235	-	-	-	-	-	-	-	-
TR6853_c1_g1	1.01	17.04	-4.087	down	0.00084228	0.027214	-	-	-	-	-	-	-	-
TR43969_c0_g2	9.55	0	5.7707	up	0.00084085	0.027172	uncharacterized protein LOC114313684 isoform X4 [Camellia sinensis]	-	-	-	-	-	-	-
TR20991_c0_g1	0.35	16.33	-5.5065	down	0.00083875	0.027107	hypothetical protein SNOG_14064 [Parastagonospora nodorum SN15]|EAT78689.1 hypothetical protein SNOG_14064 [Parastagonospora nodorum SN15]	60S ribosomal protein L6-2 OS=Arabidopsis thaliana OX=3702 GN=RPL6B PE=2 SV=1	Ribosomal protein L6e	ribosome biogenesis;organelle organization;biological_process;cellular process;cellular component assembly;cellular component organization;ribonucleoprotein complex biogenesis;ribonucleoprotein complex assembly;cellular protein-containing complex assembly;ribosome assembly;ribosomal large subunit biogenesis;protein-containing complex subunit organization;cellular component biogenesis;protein-cont…	molecular_function;structural molecule activity;structural constituent of ribosome	intracellular;cellular_component;ribonucleoprotein complex;cytosol;ribosome;cell;cytoplasm;large ribosomal subunit;cytosolic ribosome;protein-containing complex;organelle;non-membrane-bounded organelle;intracellular organelle;intracellular non-membrane-bounded organelle;ribosomal subunit;organelle part;intracellular part;cytoplasmic part;cytosolic part;intracellular organelle part;cell part;cytos…	K02934|RP-L6e, RPL6; large subunit ribosomal protein L6e	ko03010(Genetic Information Processing)
TR2199_c2_g1	409.46	162.6	1.3329	up	0.00083858	0.027106	cytochrome P450 89A2-like [Camellia sinensis]	Cytochrome P450 89A9 OS=Arabidopsis thaliana OX=3702 GN=CYP89A9 PE=2 SV=1	Cytochrome P450	-	-	-	-	-
TR4808_c0_g2	51.27	132.29	-1.3683	down	0.00083837	0.027102	bidirectional sugar transporter SWEET2-like [Camellia sinensis]	Bidirectional sugar transporter SWEET2 OS=Arabidopsis thaliana OX=3702 GN=SWEET2 PE=1 SV=1	Sugar efflux transporter for intercellular exchange	-	-	-	-	-
TR1905_c1_g1	917.33	402.03	1.1905	up	0.00083759	0.02708	serine/threonine-protein kinase PCRK1-like [Camellia sinensis]	Putative proline-rich receptor-like protein kinase PERK11 OS=Arabidopsis thaliana OX=3702 GN=PERK11 PE=2 SV=2	Protein kinase domain;Protein tyrosine kinase;Universal stress protein family	-	-	-	-	-
TR16070_c2_g1	0.34	13.33	-5.216	down	0.00083704	0.027066	-	-	-	-	-	-	-	-
TR71744_c0_g1	1.94	20.29	-3.3641	down	0.00083579	0.027029	-	-	-	-	-	-	-	-
TR62029_c0_g1	17.26	0.65	4.7547	up	0.0008353	0.027017	-	-	-	-	-	-	-	-
TR11457_c0_g3	2.01	20.23	-3.3352	down	0.00083518	0.027016	receptor-like protein EIX2 [Camellia sinensis]	-	-	-	-	-	-	-
TR14601_c0_g1	49.56	13.44	1.886	up	0.0008349	0.027016	UDP-glucuronic acid decarboxylase 1-like [Camellia sinensis]|XP_028107248.1 UDP-glucuronic acid decarboxylase 1-like [Camellia sinensis]	UDP-glucuronic acid decarboxylase 1 OS=Arabidopsis thaliana OX=3702 GN=UXS1 PE=1 SV=1	GDP-mannose 4,6 dehydratase;NAD dependent epimerase/dehydratase family;3-beta hydroxysteroid dehydrogenase/isomerase family	-	-	-	-	-
TR15493_c0_g2	20.36	1.95	3.4016	up	0.00083512	0.027016	uncharacterized protein LOC114322087 [Camellia sinensis]	-	Reverse transcriptase-like	-	-	-	-	-
TR93112_c0_g1	19.22	1.3	3.9038	up	0.00083509	0.027016	probable trehalose-phosphate phosphatase 6 [Camellia sinensis]	Probable trehalose-phosphate phosphatase 4 OS=Oryza sativa subsp. japonica OX=39947 GN=TPP4 PE=2 SV=1	Trehalose-phosphatase	-	-	-	-	-
TR282_c2_g1	159.56	69.23	1.2045	up	0.00083401	0.026993	INO80 complex subunit D-like isoform X2 [Camellia sinensis]	-	Potential DNA-binding domain	-	-	-	-	-
TR48429_c1_g1	0.31	13.3	-5.2131	down	0.00083379	0.026989	hypothetical protein CUMW_116530 [Citrus unshiu]	-	-	-	-	-	-	-
TR500_c6_g1	41.49	105.41	-1.344	down	0.00083237	0.026946	protein VTE6, chloroplastic [Camellia sinensis]	Protein VTE6, chloroplastic OS=Arabidopsis thaliana OX=3702 GN=VTE6 PE=1 SV=1	-	-	-	-	-	-
TR7607_c0_g1	34.38	112	-1.7037	down	0.00083215	0.026943	F-box protein At2g32560-like isoform X2 [Camellia sinensis]	F-box protein At2g26850 OS=Arabidopsis thaliana OX=3702 GN=At2g26850 PE=2 SV=1	F-box domain	-	-	-	-	-
TR2096_c2_g1	18.69	1	4.2702	up	0.00083131	0.026919	-	-	-	-	-	-	-	-
TR4802_c0_g1	221.37	104.45	1.0835	up	0.00083076	0.026908	uncharacterized protein LOC114287467 isoform X1 [Camellia sinensis]	-	Tim17/Tim22/Tim23/Pmp24 family	-	-	-	-	-
TR492_c0_g1	675.18	290.15	1.2181	up	0.00083085	0.026908	putative disease resistance protein At1g50180 [Camellia sinensis]	Putative disease resistance protein At1g50180 OS=Arabidopsis thaliana OX=3702 GN=At1g50180 PE=3 SV=2	NB-ARC domain;Leucine rich repeat;Leucine Rich repeats (2 copies)	-	-	-	-	-
TR55173_c0_g1	2.19	25.4	-3.4966	down	0.00082988	0.026883	protein MEI2-like 5 [Camellia sinensis]	-	-	-	-	-	-	-
TR44996_c0_g1	9.62	41.53	-2.1079	down	0.00082956	0.026876	-	-	-	-	-	-	-	-
TR31373_c0_g1	28.94	3.45	3.06	up	0.00082835	0.026841	-	-	-	-	-	-	-	-
TR140_c0_g2	9.54	0	5.7688	up	0.00082732	0.026814	homeobox protein knotted-1-like 1 [Papaver somniferum]	Homeobox protein knotted-1-like 7 OS=Arabidopsis thaliana OX=3702 GN=KNAT7 PE=1 SV=1	-	-	-	-	-	-
TR1772_c0_g2	9.54	0	5.7688	up	0.00082732	0.026814	patatin-like protein 5 [Camellia sinensis]	Patatin-like protein 5 OS=Arabidopsis thaliana OX=3702 GN=PLP5 PE=1 SV=2	-	-	-	-	-	-
TR40199_c0_g2	32.97	6.4	2.3713	up	0.0008267	0.026801	PTB domain-containing engulfment adapter protein [Actinidia chinensis var. chinensis]	-	-	-	-	-	-	-
TR48501_c1_g1	9.71	0	5.7915	up	0.00082655	0.026801	-	-	-	-	-	-	-	-
TR4393_c0_g1	120.02	43.27	1.471	up	0.000825	0.026756	PREDICTED: DNA mismatch repair protein MSH5 isoform X4 [Vitis vinifera]	DNA mismatch repair protein MSH5 OS=Arabidopsis thaliana OX=3702 GN=MSH5 PE=2 SV=1	MutS domain III;MutS domain V;MutS domain V	-	-	-	-	-
TR227507_c0_g1	9.55	0	5.7698	up	0.00082494	0.026756	-	-	-	-	-	-	-	-
TR38146_c0_g1	9.55	0	5.7698	up	0.00082494	0.026756	uncharacterized protein LOC114297164 [Camellia sinensis]|XP_028097347.1 uncharacterized protein LOC114297164 [Camellia sinensis]	-	-	-	-	-	-	-
TR53698_c0_g3	0.31	13.62	-5.2472	down	0.00082415	0.026739	-	-	-	-	-	-	-	-
TR29103_c0_g1	0.31	13.53	-5.2386	down	0.00082337	0.026717	UDP-glycosyltransferase 83A1-like [Camellia sinensis]	-	-	-	-	-	-	-
TR45710_c0_g1	2.09	24.77	-3.5972	down	0.00082291	0.02671	LRR receptor-like serine/threonine-protein kinase [Actinidia chinensis var. chinensis]	Probable LRR receptor-like serine/threonine-protein kinase At1g53430 OS=Arabidopsis thaliana OX=3702 GN=At1g53430 PE=1 SV=1	-	-	-	-	-	-
TR14563_c0_g2	3.63	26.76	-2.8772	down	0.00082294	0.02671	-	-	-	-	-	-	-	-
TR49020_c0_g1	5.53	31.63	-2.5031	down	0.00082175	0.026679	TMV resistance protein N-like isoform X2 [Camellia sinensis]	TMV resistance protein N OS=Nicotiana glutinosa OX=35889 GN=N PE=1 SV=1	TIR domain;TIR domain	-	-	-	-	-
TR3046_c0_g1	16.81	282.15	-4.0713	down	0.00082109	0.026661	leucine-rich repeat receptor-like tyrosine-protein kinase PXC3 [Camellia sinensis]	Leucine-rich repeat receptor protein kinase EMS1 OS=Arabidopsis thaliana OX=3702 GN=EMS1 PE=1 SV=1	Protein kinase domain;Protein tyrosine kinase;Leucine rich repeat;Leucine Rich repeats (2 copies)	-	-	-	-	-
TR3778_c6_g1	16.81	61.97	-1.8848	down	0.00082101	0.026661	uncharacterized protein LOC114300108 [Camellia sinensis]|XP_028100764.1 uncharacterized protein LOC114300108 [Camellia sinensis]|XP_028100765.1 uncharacterized protein LOC114300108 [Camellia sinensis]|XP_028100766.1 uncharacterized protein LOC114300108 [Camellia sinensis]|XP_028100767.1 uncharacterized protein LOC114300108 [Camellia sinensis]|XP_028100768.1 uncharacterized protein LOC114300108 [C…	-	-	-	-	-	-	-
TR2609_c1_g1	56.8	135.94	-1.2597	down	0.00081966	0.026621	cancer-related nucleoside-triphosphatase homolog isoform X1 [Camellia sinensis]	-	NTPase	-	-	-	K06928|NTPCR; nucleoside-triphosphatase [EC:3.6.1.15]	ko00230(Metabolism);ko00730(Metabolism);ko01100(Metabolism)
TR132650_c0_g1	0	9.99	-5.7637	down	0.00081925	0.026611	-	-	-	-	-	-	-	-
TR60493_c0_g1	0.7	17.15	-4.6659	down	0.00081731	0.026558	MDIS1-interacting receptor like kinase 2-like [Camellia sinensis]	MDIS1-interacting receptor like kinase 2 OS=Arabidopsis thaliana OX=3702 GN=MIK2 PE=1 SV=3	Protein kinase domain;Protein tyrosine kinase	-	-	-	-	-
TR23590_c2_g1	9.84	0	5.8142	up	0.00081719	0.026558	E3 ubiquitin-protein ligase UPL6-like isoform X2 [Camellia sinensis]	E3 ubiquitin-protein ligase UPL6 OS=Arabidopsis thaliana OX=3702 GN=UPL6 PE=2 SV=1	-	-	-	-	K10589|UBE3C; ubiquitin-protein ligase E3 C [EC:2.3.2.26]	ko04120(Genetic Information Processing)
TR500_c4_g1	337.7	149.06	1.1804	up	0.00081608	0.026525	uncharacterized protein LOC114257776 [Camellia sinensis]	-	-	-	-	-	-	-
TR20693_c0_g1	46.89	8.09	2.5427	up	0.00081573	0.026518	uncharacterized protein LOC114314023 [Camellia sinensis]	E3 ubiquitin-protein ligase At1g12760 OS=Arabidopsis thaliana OX=3702 GN=At1g12760 PE=1 SV=1	Ring finger domain;RING-like zinc finger;RING-H2 zinc finger domain;Zinc finger, C3HC4 type (RING finger)	-	-	-	-	-
TR2124_c0_g1	113.11	269.68	-1.2551	down	0.00081525	0.026505	-	-	-	-	-	-	-	-
TR531_c2_g1	69.3	159.33	-1.2008	down	0.00081516	0.026505	thioredoxin-like 3-3 [Camellia sinensis]	Thioredoxin-like 3-3 OS=Oryza sativa subsp. japonica OX=39947 GN=Os04g0560200 PE=2 SV=2	Thioredoxin	-	-	-	K03671|trxA; thioredoxin 1	ko04621(Organismal Systems)
TR220616_c0_g1	2.09	24.79	-3.598	down	0.00081493	0.026502	-	-	-	-	-	-	-	-
TR14165_c4_g1	3.97	27.61	-2.795	down	0.00081475	0.026499	cytochrome P450 CYP72A219-like [Camellia sinensis]	-	-	-	-	-	-	-
TR10546_c1_g1	0	9.8	-5.735	down	0.00081385	0.026474	-	-	-	-	-	-	-	-
TR14528_c0_g1	0	9.76	-5.7292	down	0.00081293	0.02646	LEAF RUST 10 DISEASE-RESISTANCE LOCUS RECEPTOR-LIKE PROTEIN KINASE-like 1.1 isoform X1 [Camellia sinensis]	LEAF RUST 10 DISEASE-RESISTANCE LOCUS RECEPTOR-LIKE PROTEIN KINASE-like 1.1 OS=Arabidopsis thaliana OX=3702 GN=LRK10L-1.1 PE=2 SV=1	Protein tyrosine kinase;Protein kinase domain	-	-	-	-	-
TR26794_c0_g1	0.34	14.02	-5.2908	down	0.00081334	0.02646	-	-	-	-	-	-	-	-
TR32663_c0_g1	1.05	18.55	-4.1898	down	0.00081307	0.02646	-	-	-	-	-	-	-	-
TR42632_c0_g1	11.08	50.01	-2.1754	down	0.00081321	0.02646	transcription termination factor MTEF1, chloroplastic-like [Camellia sinensis]	Transcription termination factor MTEF1, chloroplastic OS=Arabidopsis thaliana OX=3702 GN=MTERF1 PE=2 SV=2	mTERF	-	-	-	-	-
TR2338_c0_g1	68.59	173.44	-1.3359	down	0.00081325	0.02646	PREDICTED: pre-mRNA-splicing factor ATP-dependent RNA helicase DEAH1 isoform X1 [Theobroma cacao]	Pre-mRNA-splicing factor ATP-dependent RNA helicase DEAH1 OS=Arabidopsis thaliana OX=3702 GN=ESP3 PE=1 SV=1	Oligonucleotide/oligosaccharide-binding (OB)-fold	-	-	-	-	-
TR4881_c0_g1	1987.86	928.85	1.0977	up	0.00081286	0.02646	derlin-2.2-like [Camellia sinensis]	Derlin-2.2 OS=Arabidopsis thaliana OX=3702 GN=DER2.2 PE=2 SV=1	Der1-like family	-	-	-	K13989|DERL2_3; Derlin-2/3	ko04141(Genetic Information Processing)
TR3866_c2_g1	6.24	34.34	-2.4532	down	0.00081258	0.026456	flavonol 3-sulfotransferase-like [Camellia sinensis]	Flavonol 3-sulfotransferase OS=Flaveria bidentis OX=4224 PE=2 SV=1	Sulfotransferase domain;Sulfotransferase family	-	-	-	-	-
TR119097_c0_g1	9.59	0	5.7757	up	0.00081225	0.026449	uncharacterized protein LOC114257356 [Camellia sinensis]	-	Sorting nexin C terminal	-	-	-	-	-
TR1918_c2_g1	34.49	102.17	-1.5704	down	0.00081157	0.02643	-	-	-	-	-	-	-	-
TR16664_c0_g4	0	9.85	-5.7409	down	0.00081065	0.026404	-	-	-	-	-	-	-	-
TR1081_c1_g2	188.58	82.36	1.1952	up	0.00080942	0.026367	protein NLP6-like isoform X1 [Camellia sinensis]	Protein NLP6 OS=Arabidopsis thaliana OX=3702 GN=NLP6 PE=2 SV=2	Chromo (CHRromatin Organisation MOdifier) domain	-	-	-	-	-
TR27069_c0_g1	1.25	20.07	-3.9543	down	0.00080811	0.026328	uncharacterized protein LOC114259791 [Camellia sinensis]	Serine/threonine-protein phosphatase 7 long form homolog OS=Arabidopsis thaliana OX=3702 GN=MAIL3 PE=2 SV=1	Plant mobile domain	-	-	-	-	-
TR6230_c0_g1	84.94	200.14	-1.2346	down	0.00080713	0.026299	putative phospholipid-transporting ATPase 9 [Camellia sinensis]	Putative phospholipid-transporting ATPase 9 OS=Arabidopsis thaliana OX=3702 GN=ALA9 PE=3 SV=1	Phospholipid-translocating ATPase N-terminal;E1-E2 ATPase	-	-	-	-	-
TR7937_c0_g1	38.05	7.93	2.2613	up	0.00080615	0.026271	abnormal spindle-like microcephaly-associated protein homolog isoform X1 [Camellia sinensis]|XP_028095513.1 abnormal spindle-like microcephaly-associated protein homolog isoform X2 [Camellia sinensis]|XP_028095527.1 abnormal spindle-like microcephaly-associated protein homolog isoform X5 [Camellia sinensis]	-	-	-	-	-	-	-
TR3168_c4_g2	34.98	127.58	-1.8681	down	0.00080564	0.026259	metallothionein-like protein type 2 [Camellia sinensis]|ABD97257.1 metallothionin 1 [Camellia sinensis]	Metallothionein-like protein type 2 OS=Actinidia deliciosa OX=3627 GN=pKIWI504 PE=2 SV=1	-	-	-	-	-	-
TR1680_c1_g1	4439.71	9013.48	-1.0216	down	0.00080569	0.026259	probable aminotransferase TAT2 [Camellia sinensis]|AXY96231.1 aromatic amino acid aminotransferase 2 [Camellia sinensis]	Probable aminotransferase TAT2 OS=Arabidopsis thaliana OX=3702 GN=At5g53970 PE=2 SV=1	Aminotransferase class I and II	-	-	-	K00815|TAT; tyrosine aminotransferase [EC:2.6.1.5]	ko00130(Metabolism);ko00270(Metabolism);ko00350(Metabolism);ko00360(Metabolism);ko00400(Metabolism);ko00401(Metabolism);ko00950(Metabolism);ko00960(Metabolism);ko01100(Metabolism);ko01110(Metabolism)
TR12179_c0_g1	90.87	266.97	-1.5559	down	0.00080398	0.026211	calcium-binding protein PBP1-like [Camellia sinensis]	Calcium-binding protein PBP1 OS=Arabidopsis thaliana OX=3702 GN=PBP1 PE=1 SV=1	EF-hand domain pair	-	-	-	-	-
TR21082_c0_g1	47.9	7.35	2.7078	up	0.00080355	0.026203	receptor-like protein EIX2 [Camellia sinensis]	Receptor-like protein EIX1 OS=Solanum lycopersicum OX=4081 GN=EIX1 PE=2 SV=2	Leucine rich repeat;Leucine Rich repeats (2 copies);Leucine Rich Repeat;Leucine Rich repeat;Leucine Rich repeats (2 copies);Leucine rich repeat N-terminal domain	-	-	-	-	-
TR20812_c1_g1	4.89	30.42	-2.6244	down	0.00080117	0.02613	-	-	-	-	-	-	-	-
TR17793_c0_g1	0.35	14.6	-5.3493	down	0.00079896	0.026064	probable receptor-like protein kinase At1g80640 [Camellia sinensis]	Probable receptor-like protein kinase At1g80640 OS=Arabidopsis thaliana OX=3702 GN=At1g80640 PE=2 SV=1	Protein tyrosine kinase;Protein kinase domain	-	-	-	-	-
TR71962_c0_g1	9.68	0	5.7879	up	0.0007986	0.026055	-	26S proteasome non-ATPase regulatory subunit 1 homolog A OS=Arabidopsis thaliana OX=3702 GN=RPN2A PE=1 SV=1	-	-	-	-	-	-
TR26461_c0_g1	0.68	17.35	-4.6894	down	0.00079756	0.026025	-	-	-	-	-	-	-	-
TR93549_c0_g1	0	10	-5.7656	down	0.00079719	0.026016	-	-	-	-	-	-	-	-
TR8415_c1_g1	4.97	31.18	-2.6489	down	0.00079632	0.025994	-	Polyadenylate-binding protein RBP47 OS=Nicotiana plumbaginifolia OX=4092 GN=RBP47 PE=1 SV=1	-	-	-	-	-	-
TR251_c1_g1	212.09	83.49	1.3444	up	0.0007963	0.025994	uncharacterized protein LOC114258132 [Camellia sinensis]	-	-	-	-	-	-	-
TR19176_c0_g1	24.76	2.89	3.1049	up	0.00079539	0.025971	-	-	-	-	-	-	-	-
TR34180_c1_g1	9.57	0	5.7729	up	0.00079451	0.025949	protein NLP7-like isoform X1 [Camellia sinensis]	Protein NLP1 OS=Oryza sativa subsp. japonica OX=39947 GN=NLP1 PE=2 SV=1	-	-	-	-	-	-
TR13594_c1_g1	9.62	0	5.7799	up	0.0007943	0.025945	uncharacterized protein LOC114313274 isoform X2 [Camellia sinensis]	-	-	-	-	-	-	-
TR2129_c6_g1	0	9.94	-5.7528	down	0.00079411	0.025942	60S ribosomal protein L21-2-like [Camellia sinensis]	60S ribosomal protein L21-1 OS=Arabidopsis thaliana OX=3702 GN=RPL21A PE=2 SV=2	-	-	-	-	-	-
TR1666_c7_g1	15.8	0.64	4.6367	up	0.00079303	0.025911	-	-	-	-	-	-	-	-
TR4872_c0_g1	0	10.2	-5.7909	down	0.00079277	0.025908	hypothetical protein VITISV_033681 [Vitis vinifera]	Probable ribosome biogenesis protein RLP24 OS=Arabidopsis thaliana OX=3702 GN=At2g44860 PE=1 SV=1	-	-	-	-	-	-
TR56326_c0_g1	0	10.2	-5.7909	down	0.00079277	0.025908	alpha-galactosidase 3-like isoform X1 [Camellia sinensis]	Alpha-galactosidase 3 OS=Arabidopsis thaliana OX=3702 GN=AGAL3 PE=1 SV=1	-	-	-	-	-	-
TR16071_c0_g1	170.68	74.72	1.191	up	0.00079284	0.025908	uncharacterized protein LOC114297232 [Camellia sinensis]	-	DDE superfamily endonuclease;Plant transposon protein;Transposase DDE domain	-	-	-	-	-
TR22776_c0_g1	136.29	50.49	1.4332	up	0.00079248	0.025908	heavy metal-associated isoprenylated plant protein 39-like [Camellia sinensis]	-	-	-	-	-	-	-
TR25331_c0_g1	9.63	0	5.7807	up	0.0007925	0.025908	-	-	-	-	-	-	-	-
TR86047_c2_g1	9.77	0	5.8004	up	0.00079263	0.025908	-	-	-	-	-	-	-	-
TR19714_c0_g2	0	9.77	-5.7312	down	0.00079212	0.025904	protein argonaute 16-like [Camellia sinensis]|XP_028107623.1 protein argonaute 16-like [Camellia sinensis]	Protein argonaute 16 OS=Oryza sativa subsp. japonica OX=39947 GN=AGO16 PE=2 SV=2	-	-	-	-	-	-
TR295_c7_g1	0	9.97	-5.7568	down	0.00079101	0.025875	uncharacterized protein LOC114304531 [Camellia sinensis]	Putative ribonuclease H protein At1g65750 OS=Arabidopsis thaliana OX=3702 GN=At1g65750 PE=3 SV=1	-	-	-	-	-	-
TR65547_c0_g1	9.88	0	5.8191	up	0.0007905	0.025862	-	-	-	-	-	-	-	-
TR74318_c0_g1	9.58	0	5.7748	up	0.00078994	0.025847	-	-	-	-	-	-	-	-
TR56048_c1_g1	0	10.47	-5.8291	down	0.00078945	0.025834	-	-	-	-	-	-	-	-
TR7900_c0_g1	36.88	7.09	2.3852	up	0.00078915	0.025828	protein NRT1/ PTR FAMILY 5.10-like isoform X2 [Camellia sinensis]	Protein NRT1/ PTR FAMILY 5.10 OS=Arabidopsis thaliana OX=3702 GN=NPF5.10 PE=2 SV=1	POT family	-	-	-	-	-
TR30688_c0_g1	16.53	0.63	4.7013	up	0.0007889	0.025823	-	-	-	-	-	-	-	-
TR7485_c4_g1	185.26	75.24	1.2988	up	0.00078697	0.025763	uncharacterized protein LOC114309665 [Camellia sinensis]	-	Ribosomal protein L7/L12 C-terminal domain	-	-	-	K02935|RP-L7, MRPL12, rplL; large subunit ribosomal protein L7/L12	ko03010(Genetic Information Processing)
TR24661_c0_g1	10.65	0	5.9292	up	0.00078674	0.02576	putative disease resistance protein RGA4 [Camellia sinensis]	Disease resistance protein RGA2 OS=Solanum bulbocastanum OX=147425 GN=RGA2 PE=1 SV=1	-	-	-	-	-	-
TR36983_c1_g1	23.67	0	7.0771	up	0.00078676	0.02576	-	-	-	-	-	-	-	-
TR88534_c0_g1	0	9.89	-5.7469	down	0.0007858	0.025735	E2F transcription factor-like E2FF [Camellia sinensis]	E2F transcription factor-like E2FE OS=Arabidopsis thaliana OX=3702 GN=E2FE PE=1 SV=1	-	-	-	-	-	-
TR8649_c2_g1	240	539.34	-1.1681	down	0.00078569	0.025735	14-3-3 protein 1 [Camellia sinensis]	14-3-3 protein 1 OS=Solanum lycopersicum OX=4081 GN=TFT1 PE=3 SV=2	14-3-3 protein	-	-	-	-	-
TR17765_c0_g1	154.52	58.8	1.3938	up	0.0007857	0.025735	Unconventional myosin-XVB like [Actinidia chinensis var. chinensis]	-	-	-	-	-	-	-
TR140558_c0_g1	0	9.85	-5.7412	down	0.00078468	0.025708	L10-interacting MYB domain-containing protein-like [Camellia sinensis]	-	-	-	-	-	-	-
TR20760_c2_g2	9.58	0	5.7738	up	0.00078453	0.025707	-	-	-	-	-	-	-	-
TR2828_c1_g1	9.58	0	5.7738	up	0.00078453	0.025707	-	-	-	-	-	-	-	-
TR7679_c0_g1	37.29	7.71	2.281	up	0.00078412	0.0257	uncharacterized protein LOC114265858 isoform X4 [Camellia sinensis]	-	Brf1-like TBP-binding domain	-	-	-	-	-
TR9956_c0_g1	1.05	18.5	-4.1843	down	0.00078268	0.025656	protein FAR-RED IMPAIRED RESPONSE 1-like [Camellia sinensis]	Protein FAR-RED IMPAIRED RESPONSE 1 OS=Arabidopsis thaliana OX=3702 GN=FAR1 PE=1 SV=1	-	-	-	-	-	-
TR49524_c0_g1	140.62	48.96	1.5248	up	0.00078258	0.025656	anthocyanidin 3-O-glucosyltransferase 2-like [Camellia sinensis]	Anthocyanidin 3-O-glucosyltransferase 2 (Fragment) OS=Manihot esculenta OX=3983 GN=GT2 PE=2 SV=1	UDP-glucoronosyl and UDP-glucosyl transferase	-	-	-	-	-
TR30190_c0_g1	0	9.79	-5.7332	down	0.00078116	0.025616	DNA mismatch repair protein MSH2 [Camellia sinensis]	DNA mismatch repair protein MSH2 OS=Arabidopsis thaliana OX=3702 GN=MSH2 PE=1 SV=1	-	-	-	-	-	-
TR14265_c0_g1	8.31	39.81	-2.2579	down	0.00078124	0.025616	protein DETOXIFICATION 45, chloroplastic-like isoform X1 [Camellia sinensis]	Protein DETOXIFICATION 45, chloroplastic OS=Arabidopsis thaliana OX=3702 GN=DTX45 PE=2 SV=2	MatE;Polysaccharide biosynthesis C-terminal domain	-	-	-	-	-
TR53474_c3_g1	9.66	0	5.7856	up	0.0007808	0.025608	-	-	-	-	-	-	-	-
TR2601_c0_g1	385.45	967.09	-1.3271	down	0.00078	0.025585	uncharacterized protein LOC114267947 [Camellia sinensis]	-	Domain of unknown function (DUF569);Fascin domain	-	-	-	-	-
TR11459_c0_g2	460.15	3103.91	-2.754	down	0.00077987	0.025584	Glutathione S-transferase, partial [Actinidia chinensis var. chinensis]	Glutathione S-transferase L3 OS=Arabidopsis thaliana OX=3702 GN=GSTL3 PE=2 SV=1	Glutathione S-transferase, N-terminal domain;Glutathione S-transferase, C-terminal domain;Glutathione S-transferase, C-terminal domain	-	-	-	K00799|GST, gst; glutathione S-transferase [EC:2.5.1.18]	ko00480(Metabolism);ko00980(Metabolism);ko00982(Metabolism);ko00983(Metabolism);ko01100(Metabolism);ko04212(Organismal Systems)
TR667_c15_g1	0	9.79	-5.7331	down	0.00077974	0.025583	hydroxyacylglutathione hydrolase 2, mitochondrial-like isoform X2 [Olea europaea var. sylvestris]	Hydroxyacylglutathione hydrolase 2, mitochondrial OS=Arabidopsis thaliana OX=3702 GN=At2g31350 PE=1 SV=1	-	-	-	-	-	-
TR3980_c0_g1	68.39	20.04	1.7726	up	0.00077968	0.025583	uncharacterized protein LOC114312010 [Camellia sinensis]	-	-	-	-	-	-	-
TR469_c2_g2	51.68	10.3	2.3345	up	0.00077929	0.025575	protein argonaute 10-like [Camellia sinensis]|XP_028118114.1 protein argonaute 10-like [Camellia sinensis]|XP_028118115.1 protein argonaute 10-like [Camellia sinensis]|XP_028118116.1 protein argonaute 10-like [Camellia sinensis]|XP_028118117.1 protein argonaute 10-like [Camellia sinensis]|XP_028118119.1 protein argonaute 10-like [Camellia sinensis]	-	-	-	-	-	-	-
TR32708_c1_g2	9.85	45.83	-2.2111	down	0.00077879	0.025568	-	-	-	-	-	-	-	-
TR146156_c0_g1	10.23	0	5.8656	up	0.00077887	0.025568	uncharacterized protein LOC114290432 [Camellia sinensis]	-	-	-	-	-	-	-
TR28631_c0_g1	3.81	29.9	-2.9449	down	0.00077842	0.02556	probable E3 ubiquitin-protein ligase RHA4A isoform X1 [Camellia sinensis]	Probable E3 ubiquitin-protein ligase RHA4A OS=Arabidopsis thaliana OX=3702 GN=RHA4A PE=2 SV=1	Ring finger domain;RING-like zinc finger;RING-H2 zinc finger domain;Zinc finger, C3HC4 type (RING finger)	-	-	-	-	-
TR2886_c1_g1	9.7	0	5.7906	up	0.00077682	0.025514	uncharacterized protein LOC114318217 isoform X2 [Camellia sinensis]|XP_028088207.1 uncharacterized protein LOC114288821 isoform X2 [Camellia sinensis]	-	-	-	-	-	-	-
TR27038_c0_g1	6.56	42.31	-2.6829	down	0.00077608	0.025493	cyclin-D1-1-like [Camellia sinensis]	Cyclin-D1-1 OS=Arabidopsis thaliana OX=3702 GN=CYCD1-1 PE=1 SV=3	Cyclin, N-terminal domain;Cyclin, C-terminal domain	-	-	-	-	-
TR11873_c0_g1	62.3	149.37	-1.2627	down	0.00077608	0.025493	uncharacterized protein LOC114263087 [Camellia sinensis]	-	Iron-Sulfur binding protein C terminal;MULE transposase domain;MuDR family transposase;Transposase, Mutator family;SWIM zinc finger;Iron-Sulfur binding protein C terminal;4Fe-4S binding domain;4Fe-4S dicluster domain;4Fe-4S dicluster domain	-	-	-	-	-
TR5427_c3_g1	19.06	1.3	3.8954	up	0.00077556	0.025483	-	-	-	-	-	-	-	-
TR16589_c0_g1	30.7	110.82	-1.8508	down	0.00077429	0.025444	putative RING-H2 finger protein ATL21A isoform X1 [Camellia sinensis]	Putative RING-H2 finger protein ATL21A OS=Arabidopsis thaliana OX=3702 GN=ATL21A PE=3 SV=1	Ring finger domain;RING-H2 zinc finger domain;RING-like zinc finger;Zinc finger, C3HC4 type (RING finger);Wall-associated receptor kinase galacturonan-binding;Zinc finger, C3HC4 type (RING finger);RING-type zinc-finger;Anaphase-promoting complex subunit 11 RING-H2 finger;Zinc finger, C3HC4 type (RING finger)	-	-	-	-	-
TR3466_c1_g1	0.31	13.59	-5.2442	down	0.00077349	0.025421	-	-	-	-	-	-	-	-
TR471_c25_g1	142.59	315.75	-1.1469	down	0.00077314	0.025413	RING-H2 finger protein ATL8-like [Camellia sinensis]	RING-H2 finger protein ATL8 OS=Arabidopsis thaliana OX=3702 GN=ATL8 PE=2 SV=2	Ring finger domain;RING-like zinc finger;Zinc finger, C3HC4 type (RING finger);RING-H2 zinc finger domain;Zinc finger, C3HC4 type (RING finger);Anaphase-promoting complex subunit 11 RING-H2 finger;zinc-RING finger domain;RING-type zinc-finger	-	-	-	-	-
TR34_c1_g1	5431.49	2267.66	1.2601	up	0.00077258	0.025398	zinc finger A20 and AN1 domain-containing stress-associated protein 4-like isoform X1 [Camellia sinensis]	Zinc finger A20 and AN1 domain-containing stress-associated protein 4 OS=Oryza sativa subsp. japonica OX=39947 GN=SAP4 PE=2 SV=1	A20-like zinc finger;AN1-like Zinc finger;bZIP transcription factor	-	-	-	-	-
TR85818_c0_g1	9.6	0	5.7769	up	0.00077234	0.025394	uncharacterized protein LOC114298222 [Camellia sinensis]	-	Myb/SANT-like DNA-binding domain	-	-	-	-	-
TR61635_c1_g1	51.56	9.64	2.4254	up	0.00077147	0.025368	disease resistance protein At4g27190-like [Camellia sinensis]	-	-	-	-	-	-	-
TR2374_c12_g1	42.7	111.97	-1.391	down	0.00077061	0.025344	-	-	-	-	-	-	-	-
TR323_c0_g1	19.49	1.91	3.3537	up	0.00077044	0.025344	-	-	-	-	-	-	-	-
TR29107_c0_g1	9.92	0	5.8239	up	0.00077056	0.025344	-	-	-	-	-	-	-	-
TR53080_c0_g1	10.06	0	5.8463	up	0.00077062	0.025344	-	-	-	-	-	-	-	-
TR13758_c0_g1	43.12	8.97	2.2699	up	0.00077014	0.025341	histone acetyltransferase GCN5 isoform X2 [Camellia sinensis]	Histone acetyltransferase GCN5 OS=Arabidopsis thaliana OX=3702 GN=HAG1 PE=1 SV=1	-	-	-	-	-	-
TR32508_c0_g1	17.32	0.61	4.793	up	0.00077004	0.025341	-	-	-	-	-	-	-	-
TR22041_c1_g1	14.19	0.33	5.3816	up	0.00077009	0.025341	thioredoxin H-type-like [Camellia sinensis]	Thioredoxin H2 OS=Arabidopsis thaliana OX=3702 GN=TRX2 PE=2 SV=2	Thioredoxin;Thioredoxin-like;Thioredoxin-like domain;Thioredoxin	-	-	-	K03671|trxA; thioredoxin 1	ko04621(Organismal Systems)
TR16159_c0_g1	9.72	0	5.7929	up	0.00076972	0.025341	DEAD-box ATP-dependent RNA helicase 46-like isoform X4 [Camellia sinensis]	DEAD-box ATP-dependent RNA helicase 14 OS=Arabidopsis thaliana OX=3702 GN=RH14 PE=1 SV=2	-	-	-	-	-	-
TR27732_c0_g2	9.84	0	5.8095	up	0.00076989	0.025341	-	-	-	-	-	-	-	-
TR1424_c0_g1	252.34	105.41	1.2606	up	0.00076959	0.02534	protein LUTEIN DEFICIENT 5, chloroplastic isoform X2 [Camellia sinensis]	Protein LUTEIN DEFICIENT 5, chloroplastic OS=Arabidopsis thaliana OX=3702 GN=CYP97A3 PE=1 SV=1	Cytochrome P450	-	-	-	K15747|LUT5, CYP97A3; beta-ring hydroxylase [EC:1.14.-.-]	ko00906(Metabolism);ko01100(Metabolism);ko01110(Metabolism)
TR1603_c0_g3	15165.2	7364.2	1.0422	up	0.00076943	0.025338	cysteine protease RD19A-like [Camellia sinensis]	Cysteine protease RD19A OS=Arabidopsis thaliana OX=3702 GN=RD19A PE=1 SV=1	Papain family cysteine protease;Cathepsin propeptide inhibitor domain (I29)	-	-	-	K01373|CTSF; cathepsin F [EC:3.4.22.41]	ko04142(Cellular Processes);ko04210(Cellular Processes);ko04626(Organismal Systems)
TR14255_c0_g1	32.94	223.72	-2.7611	down	0.00076807	0.025297	wall-associated receptor kinase 2-like [Camellia sinensis]	Wall-associated receptor kinase 2 OS=Arabidopsis thaliana OX=3702 GN=WAK2 PE=1 SV=1	Protein kinase domain;Protein tyrosine kinase;Wall-associated receptor kinase galacturonan-binding;Calcium-binding EGF domain;EGF domain;Complement Clr-like EGF-like	-	-	-	-	-
TR46307_c0_g1	0	9.95	-5.7548	down	0.00076745	0.025283	TNF receptor-associated factor homolog 1a-like [Camellia sinensis]	Nuclear poly(A) polymerase 1 OS=Arabidopsis thaliana OX=3702 GN=PAPS1 PE=1 SV=1	-	-	-	-	-	-
TR47720_c0_g1	1.37	20.6	-3.934	down	0.00076721	0.025278	uncharacterized protein LOC114312148 [Camellia sinensis]	-	gag-polypeptide of LTR copia-type	-	-	-	-	-
TR113017_c1_g2	10.53	0	5.907	up	0.00076667	0.025264	-	-	-	-	-	-	-	-
TR24807_c0_g1	209.5	90.68	1.2074	up	0.00076597	0.025244	uncharacterized protein LOC114264574 [Camellia sinensis]	-	-	-	-	-	-	-
TR141229_c0_g1	0	11	-5.9016	down	0.000765	0.025215	-	-	-	-	-	-	-	-
TR18666_c1_g2	0	9.8	-5.7351	down	0.00076393	0.025183	-	-	-	-	-	-	-	-
TR233219_c0_g1	0	9.8	-5.7351	down	0.00076393	0.025183	-	-	-	-	-	-	-	-
TR6036_c2_g1	10.87	45.36	-2.0551	down	0.00076372	0.025183	-	-	-	-	-	-	-	-
TR58532_c0_g1	10.2	0	5.8613	up	0.00076314	0.025167	-	-	-	-	-	-	-	-
TR40422_c0_g1	13.25	0.3	5.2802	up	0.00075991	0.025064	uncharacterized protein LOC114314123 [Camellia sinensis]	-	-	-	-	-	-	-
TR8629_c1_g1	10.25	0	5.8682	up	0.00075762	0.024992	elongation factor Tu, mitochondrial-like [Camellia sinensis]	Elongation factor Tu, mitochondrial OS=Arabidopsis thaliana OX=3702 GN=TUFA PE=1 SV=1	Elongation factor Tu GTP binding domain	-	-	-	-	-
TR19215_c0_g1	13.34	0.3	5.2889	up	0.00075711	0.024982	uncharacterized protein LOC114269722 [Camellia sinensis]	-	DDE superfamily endonuclease;Transposase DDE domain	-	-	-	-	-
TR8336_c0_g1	0	9.86	-5.7431	down	0.00075688	0.024981	uncharacterized protein LOC114308549 [Camellia sinensis]|XP_028109962.1 uncharacterized protein LOC114308549 [Camellia sinensis]|XP_028109963.1 uncharacterized protein LOC114308549 [Camellia sinensis]|XP_028109964.1 uncharacterized protein LOC114308549 [Camellia sinensis]	Histone deacetylase 15 OS=Arabidopsis thaliana OX=3702 GN=HDA15 PE=2 SV=2	-	-	-	-	-	-
TR52681_c1_g1	18.65	0.95	4.2896	up	0.000757	0.024981	SPX domain-containing protein 3-like [Camellia sinensis]	SPX domain-containing protein 3 OS=Arabidopsis thaliana OX=3702 GN=SPX3 PE=2 SV=1	-	-	-	-	-	-
TR5269_c0_g1	175.81	14.28	3.6223	up	0.00075588	0.024954	ethylene-responsive transcription factor ERF061-like [Camellia sinensis]	Ethylene-responsive transcription factor ERF061 OS=Arabidopsis thaliana OX=3702 GN=ERF061 PE=2 SV=1	AP2 domain	-	-	-	-	-
TR2911_c2_g1	4.68	29.02	-2.6347	down	0.00075567	0.02495	-	-	-	-	-	-	-	-
TR46635_c0_g1	0	9.82	-5.7371	down	0.00075538	0.024944	-	-	-	-	-	-	-	-
TR10994_c0_g1	0	9.83	-5.739	down	0.00075513	0.024939	-	-	-	-	-	-	-	-
TR5325_c0_g2	0	9.83	-5.739	down	0.00075513	0.024939	B-box zinc finger protein 19-like [Camellia sinensis]	-	-	-	-	-	-	-
TR9230_c1_g1	414.36	961.04	-1.2136	down	0.00075496	0.024939	inositol-phosphate phosphatase-like isoform X1 [Camellia sinensis]	Inositol monophosphatase 3 OS=Solanum lycopersicum OX=4081 GN=IMP3 PE=1 SV=1	Inositol monophosphatase family	-	-	-	K10047|VTC4; inositol-phosphate phosphatase / L-galactose 1-phosphate phosphatase [EC:3.1.3.25 3.1.3.93]	ko00053(Metabolism);ko00562(Metabolism);ko01100(Metabolism);ko01110(Metabolism);ko04070(Environmental Information Processing)
TR8128_c0_g1	5193.13	2482.2	1.0651	up	0.00075486	0.024939	carotenoid cleavage dioxygenase [Camellia sinensis]	Carotenoid 9,10(9&apos	Retinal pigment epithelial membrane protein	-	-	-	-	-
TR94851_c0_g1	44.46	8.35	2.4174	up	0.00075493	0.024939	uncharacterized protein LOC114311749 isoform X1 [Camellia sinensis]	-	-	-	-	-	-	-
TR968_c7_g1	1020.04	2282.15	-1.1616	down	0.00075438	0.024934	jasmonate-zim-domain protein [Camellia sinensis]	Protein TIFY 10b OS=Oryza sativa subsp. japonica OX=39947 GN=TIFY10B PE=1 SV=1	tify domain;Divergent CCT motif	-	-	-	K13464|JAZ; jasmonate ZIM domain-containing protein	ko04075(Environmental Information Processing)
TR2747_c0_g1	620.47	308.91	1.0065	up	0.00075449	0.024934	50S ribosomal protein L3-2, mitochondrial-like isoform X1 [Camellia sinensis]	50S ribosomal protein L3-2, chloroplastic OS=Arabidopsis thaliana OX=3702 GN=RPL3B PE=2 SV=1	Ribosomal protein L3	-	-	-	K02906|RP-L3, MRPL3, rplC; large subunit ribosomal protein L3	ko03010(Genetic Information Processing)
TR59126_c0_g1	42.22	7.12	2.5574	up	0.0007534	0.024908	cytochrome P450 89A2-like [Camellia sinensis]	Cytochrome P450 89A9 OS=Arabidopsis thaliana OX=3702 GN=CYP89A9 PE=2 SV=1	-	-	-	-	-	-
TR716_c0_g3	901.85	2294.05	-1.347	down	0.00075255	0.024884	B2 protein-like [Camellia sinensis]	B2 protein OS=Daucus carota OX=4039 PE=2 SV=1	Development and cell death domain	-	-	-	-	-
TR22_c0_g1	2330.77	5504.39	-1.2397	down	0.00075204	0.02487	arginine decarboxylase-like [Camellia sinensis]	Arginine decarboxylase 2 OS=Arabidopsis thaliana OX=3702 GN=ADC2 PE=1 SV=1	Pyridoxal-dependent decarboxylase, pyridoxal binding domain	-	-	-	K01583|E4.1.1.19; arginine decarboxylase [EC:4.1.1.19]	ko00330(Metabolism);ko01100(Metabolism)
TR132796_c0_g1	31.13	4.31	2.8362	up	0.00075145	0.024854	LOW QUALITY PROTEIN: uncharacterized protein LOC114317466 [Camellia sinensis]	-	-	-	-	-	-	-
TR60762_c0_g1	31.36	4.81	2.7105	up	0.00075132	0.024853	-	-	-	-	-	-	-	-
TR50686_c0_g1	13.23	0.32	5.278	up	0.00075058	0.024831	probable disease resistance protein At1g61190 [Camellia sinensis]	-	NB-ARC domain;Leucine rich repeat;Leucine Rich repeats (2 copies)	-	-	-	-	-
TR11140_c0_g1	0	10.16	-5.7867	down	0.00075042	0.024829	eukaryotic translation initiation factor 4B3-like [Camellia sinensis]	Eukaryotic translation initiation factor 4B3 OS=Arabidopsis thaliana OX=3702 GN=EIF4B3 PE=1 SV=1	-	-	-	-	-	-
TR1476_c15_g1	0	10.12	-5.7813	down	0.00075031	0.024829	-	-	-	-	-	-	-	-
TR40919_c0_g1	13.91	0.32	5.3498	up	0.0007501	0.024829	DNA mismatch repair protein MLH3-like isoform X7 [Camellia sinensis]	-	-	-	-	-	K08739|MLH3; DNA mismatch repair protein MLH3	ko03430(Genetic Information Processing)
TR16703_c1_g1	9.66	0	5.7847	up	0.00075031	0.024829	-	-	-	-	-	-	-	-
TR58352_c0_g2	901.86	435.99	1.0484	up	0.00074994	0.024827	profilin [Camellia sinensis]	Profilin OS=Pyrus communis OX=23211 PE=1 SV=1	Profilin	-	-	-	K05759|PFN; profilin	ko04013(Environmental Information Processing);ko04015(Environmental Information Processing);ko04810(Cellular Processes)
TR37117_c0_g2	0.62	17.37	-4.7299	down	0.00074767	0.024755	ABC transporter B family member 11-like isoform X1 [Camellia sinensis]|XP_028100533.1 ABC transporter B family member 11-like isoform X1 [Camellia sinensis]	ABC transporter B family member 21 OS=Arabidopsis thaliana OX=3702 GN=ABCB21 PE=1 SV=2	ABC transporter;RecF/RecN/SMC N terminal domain	-	-	-	-	-
TR38190_c0_g1	18.9	78.82	-2.0635	down	0.0007475	0.024752	RPM1-interacting protein, partial [Actinidia chinensis var. chinensis]	RPM1-interacting protein 4 OS=Arabidopsis thaliana OX=3702 GN=RIN4 PE=1 SV=1	Cleavage site for pathogenic type III effector avirulence factor Avr	-	-	-	K13456|RIN4; RPM1-interacting protein 4	ko04626(Organismal Systems)
TR62804_c0_g1	0	9.92	-5.7509	down	0.00074692	0.024736	uncharacterized protein LOC114299868 isoform X5 [Camellia sinensis]	Chaperonin CPN60-like 2, mitochondrial OS=Arabidopsis thaliana OX=3702 GN=At3g13860 PE=1 SV=2	-	-	-	-	-	-
TR33693_c0_g2	0	9.85	-5.7411	down	0.00074638	0.024722	polyadenylate-binding protein 7-like [Camellia sinensis]	Polyadenylate-binding protein 7 OS=Arabidopsis thaliana OX=3702 GN=PAB7 PE=2 SV=1	RNA recognition motif. (a.k.a. RRM, RBD, or RNP domain);Poly-adenylate binding protein, unique domain;Nup53/35/40-type RNA recognition motif;RNA recognition motif	-	-	-	K13126|PABPC; polyadenylate-binding protein	ko03013(Genetic Information Processing);ko03015(Genetic Information Processing);ko03018(Genetic Information Processing)
TR82339_c0_g1	10.64	0	5.9211	up	0.00074632	0.024722	-	-	-	-	-	-	-	-
TR12996_c3_g1	10.62	0	5.922	up	0.0007462	0.024722	-	-	-	-	-	-	-	-
TR53190_c0_g1	9.79	0	5.8034	up	0.00074573	0.024713	mRNA cap guanine-N7 methyltransferase 1-like [Camellia sinensis]|XP_028083340.1 mRNA cap guanine-N7 methyltransferase 1-like [Camellia sinensis]	mRNA cap guanine-N7 methyltransferase 1 OS=Arabidopsis thaliana OX=3702 GN=At3g20650 PE=2 SV=1	mRNA capping enzyme	-	-	-	K00565|RNMT; mRNA (guanine-N7-)-methyltransferase [EC:2.1.1.56]	ko03015(Genetic Information Processing)
TR12032_c1_g1	0	9.91	-5.749	down	0.00074529	0.024702	disease resistance protein RPP13-like [Camellia sinensis]	-	-	-	-	-	-	-
TR4443_c0_g1	42.05	130.91	-1.6394	down	0.00074498	0.024695	uncharacterized protein LOC114302290 [Camellia sinensis]	-	Protein of unknown function (DUF1005);Protein of unknown function (DUF1005)	-	-	-	-	-
TR24719_c1_g1	17.07	0.94	4.1741	up	0.0007449	0.024695	-	-	-	-	-	-	-	-
TR6930_c1_g1	18.25	0.95	4.2591	up	0.00074463	0.02469	kinesin-like protein KIN-5B isoform X2 [Camellia sinensis]	-	-	-	-	-	-	-
TR111558_c0_g1	0	9.91	-5.7489	down	0.00074393	0.02467	uncharacterized protein LOC114271582 [Camellia sinensis]	-	C1 domain;Phorbol esters/diacylglycerol binding domain (C1 domain)	-	-	-	-	-
TR31918_c0_g1	23.28	76.48	-1.7147	down	0.00074373	0.024667	probable disease resistance protein At4g27220 [Camellia sinensis]	Probable disease resistance protein At1g12290 OS=Arabidopsis thaliana OX=3702 GN=At1g12290 PE=3 SV=1	Leucine rich repeat;Leucine Rich repeats (2 copies)	-	-	-	-	-
TR13294_c0_g1	21.93	70.35	-1.6856	down	0.00074309	0.024649	uncharacterized protein LOC114309237 isoform X1 [Camellia sinensis]	-	-	-	-	-	-	-
TR12675_c1_g1	0.7	17.02	-4.6565	down	0.00074247	0.024631	-	-	-	-	-	-	-	-
TR7972_c0_g1	0	10.55	-5.8433	down	0.00074154	0.024607	uncharacterized protein LOC114313165 [Camellia sinensis]	-	-	-	-	-	-	-
TR111386_c0_g1	0	9.85	-5.741	down	0.00074165	0.024607	-	-	-	-	-	-	-	-
TR10456_c0_g1	37.74	103.26	-1.45	down	0.00074107	0.024595	-	-	-	-	-	-	-	-
TR24995_c1_g1	21.85	2.22	3.2967	up	0.00073907	0.024532	rac-like GTP-binding protein RAC2 [Camellia sinensis]	Rac-like GTP-binding protein RAC2 OS=Lotus japonicus OX=34305 GN=RAC2 PE=2 SV=1	Ras family;Ras of Complex, Roc, domain of DAPkinase	-	-	-	K04392|RAC1; Ras-related C3 botulinum toxin substrate 1	ko04010(Environmental Information Processing);ko04013(Environmental Information Processing);ko04014(Environmental Information Processing);ko04015(Environmental Information Processing);ko04024(Environmental Information Processing);ko04062(Organismal Systems);ko04071(Environmental Information Processing);ko04145(Cellular Processes);ko04151(Environmental Information Processing);ko04310(Environmental…
TR38377_c1_g1	17.52	0.63	4.7877	up	0.00073868	0.024522	LOB domain-containing protein 37-like [Camellia sinensis]	LOB domain-containing protein 37 OS=Arabidopsis thaliana OX=3702 GN=LBD37 PE=2 SV=1	Lateral organ boundaries (LOB) domain	-	-	-	-	-
TR41316_c0_g1	9.64	0	5.7818	up	0.00073863	0.024522	signal recognition particle receptor subunit alpha homolog [Sesamum indicum]|XP_020554307.1 signal recognition particle receptor subunit alpha homolog [Sesamum indicum]	-	SRP54-type protein, helical bundle domain	-	-	-	K13431|SRPR; signal recognition particle receptor subunit alpha	ko03060(Genetic Information Processing)
TR88438_c0_g1	0.31	13.76	-5.2612	down	0.0007379	0.024503	LOW QUALITY PROTEIN: DNA-directed RNA polymerase II subunit 1-like [Camellia sinensis]	DNA-directed RNA polymerase II subunit 1 OS=Arabidopsis thaliana OX=3702 GN=NRPB1 PE=1 SV=3	RNA polymerase Rpb1, domain 6	-	-	-	K03006|RPB1, POLR2A; DNA-directed RNA polymerase II subunit RPB1 [EC:2.7.7.6]	ko03020(Genetic Information Processing)
TR20110_c0_g1	0	10.75	-5.8648	down	0.0007377	0.024502	-	-	-	-	-	-	-	-
TR12312_c0_g1	36.11	133.72	-1.8903	down	0.00073768	0.024502	-	-	-	-	-	-	-	-
TR457_c2_g1	2250.12	1092.01	1.043	up	0.0007378	0.024502	40S ribosomal protein S10-1-like [Camellia sinensis]	40S ribosomal protein S10-3 OS=Arabidopsis thaliana OX=3702 GN=RPS10C PE=2 SV=2	Plectin/S10 domain	-	-	-	K02947|RP-S10e, RPS10; small subunit ribosomal protein S10e	ko03010(Genetic Information Processing)
TR36943_c0_g1	3.33	25.45	-2.9347	down	0.00073546	0.024439	-	-	-	-	-	-	-	-
TR19671_c0_g1	9.76	0	5.7987	up	0.00073559	0.024439	putative receptor-like protein kinase At4g00960 isoform X1 [Camellia sinensis]	-	-	-	-	-	-	-
TR52476_c0_g1	9.76	0	5.7987	up	0.00073559	0.024439	LysM domain receptor-like kinase [Actinidia chinensis var. chinensis]	-	-	-	-	-	-	-
TR25179_c0_g2	10.81	0	5.9458	up	0.00073477	0.024421	-	-	-	-	-	-	-	-
TR204367_c0_g1	0.35	13.96	-5.2829	down	0.00073379	0.024392	-	-	-	-	-	-	-	-
TR667_c3_g1	377.5	138.3	1.4494	up	0.00073205	0.024337	uncharacterized protein LOC114313136 isoform X1 [Camellia sinensis]	Beta-xylosidase/alpha-L-arabinofuranosidase 2 OS=Medicago sativa subsp. varia OX=36902 GN=Xyl2 PE=2 SV=1	Glycosyl hydrolase family 3 N terminal domain;Glycosyl hydrolase family 3 C-terminal domain	-	-	-	K05349|bglX; beta-glucosidase [EC:3.2.1.21]	ko00460(Metabolism);ko00500(Metabolism);ko00940(Metabolism);ko01100(Metabolism);ko01110(Metabolism)
TR24490_c0_g1	18.03	1	4.2175	up	0.0007312	0.024312	-	-	-	-	-	-	-	-
TR40276_c0_g1	18.54	1.6	3.5411	up	0.00073104	0.02431	glycosyltransferase BC10-like [Camellia sinensis]|XP_028079763.1 glycosyltransferase BC10-like [Camellia sinensis]|XP_028079764.1 glycosyltransferase BC10-like [Camellia sinensis]	-	-	-	-	-	-	-
TR259460_c0_g1	10.04	0	5.8408	up	0.00073077	0.024305	uncharacterized protein LOC114265350 [Camellia sinensis]	-	-	-	-	-	-	-
TR30115_c0_g4	12	52.02	-2.1156	down	0.00072872	0.024243	-	-	-	-	-	-	-	-
TR119931_c0_g1	0	10.31	-5.8087	down	0.00072706	0.024191	-	-	-	-	-	-	-	-
TR42886_c0_g2	0	10.11	-5.779	down	0.00072701	0.024191	-	-	-	-	-	-	-	-
TR1556_c0_g1	286.54	128.65	1.1555	up	0.00072708	0.024191	cysteine synthase-like isoform X1 [Camellia sinensis]|XP_028081180.1 cysteine synthase-like isoform X2 [Camellia sinensis]	Cysteine synthase, chloroplastic/chromoplastic OS=Solanum tuberosum OX=4113 PE=2 SV=1	Pyridoxal-phosphate dependent enzyme	-	-	-	-	-
TR64286_c0_g1	0	10.03	-5.7696	down	0.0007255	0.024148	IQ domain-containing protein IQM4-like [Camellia sinensis]	IQ domain-containing protein IQM1 OS=Arabidopsis thaliana OX=3702 GN=IQM1 PE=1 SV=1	-	-	-	-	-	-
TR101304_c0_g1	16.92	0.94	4.1604	up	0.00072533	0.024148	uncharacterized protein LOC114322503 isoform X2 [Camellia sinensis]	-	-	-	-	-	-	-
TR8425_c2_g1	9.87	0	5.8175	up	0.00072545	0.024148	uncharacterized protein LOC114320939 [Camellia sinensis]	-	-	-	-	-	-	-
TR3719_c1_g2	9.39	39.95	-2.0923	down	0.00072475	0.024133	LEAF RUST 10 DISEASE-RESISTANCE LOCUS RECEPTOR-LIKE PROTEIN KINASE-like 1.5 [Camellia sinensis]	LEAF RUST 10 DISEASE-RESISTANCE LOCUS RECEPTOR-LIKE PROTEIN KINASE-like 1.5 OS=Arabidopsis thaliana OX=3702 GN=LRK10L-1.5 PE=3 SV=1	Protein tyrosine kinase;Protein kinase domain	-	-	-	-	-
TR160820_c0_g1	0.31	13.9	-5.2774	down	0.00072399	0.024114	Ran GTPase-activating protein [Actinidia chinensis var. chinensis]	-	-	-	-	-	-	-
TR79208_c0_g1	68.67	15.15	2.1858	up	0.00072342	0.024098	U-box domain-containing protein 35-like [Camellia sinensis]	U-box domain-containing protein 52 OS=Arabidopsis thaliana OX=3702 GN=PUB52 PE=2 SV=1	Protein kinase domain;Protein tyrosine kinase;Universal stress protein family	-	-	-	-	-
TR395_c0_g1	232.59	93.91	1.3082	up	0.00072167	0.024043	putative F-box protein PP2-B12 isoform X2 [Camellia sinensis]	F-box protein PP2-B10 OS=Arabidopsis thaliana OX=3702 GN=PP2B10 PE=1 SV=1	Phloem protein 2	-	-	-	-	-
TR57280_c0_g2	9.72	0	5.7936	up	0.00072136	0.024036	-	-	-	-	-	-	-	-
TR16239_c0_g1	0	10.68	-5.8556	down	0.00072063	0.024017	Protein ENHANCED DISEASE RESISTANCE 2-like [Actinidia chinensis var. chinensis]	Protein ENHANCED DISEASE RESISTANCE 2 OS=Arabidopsis thaliana OX=3702 GN=EDR2 PE=2 SV=1	START domain;Protein of unknown function (DUF1336);PH domain;Protein of unknown function (DUF1336)	-	-	-	-	-
TR66595_c0_g2	16.76	0.63	4.7242	up	0.0007207	0.024017	-	-	-	-	-	-	-	-
TR71352_c1_g1	18.15	68.03	-1.908	down	0.00072	0.024	-	-	-	-	-	-	-	-
TR257_c1_g1	44.69	9.4	2.2442	up	0.00071987	0.023999	-	-	-	-	-	-	-	-
TR28873_c1_g1	11.76	0	6.0657	up	0.00071944	0.023988	-	-	-	-	-	-	-	-
TR26006_c1_g1	952.45	470.32	1.018	up	0.00071924	0.023985	DNA-directed RNA polymerase III subunit RPC10-like [Camellia sinensis]|XP_028089797.1 DNA-directed RNA polymerase III subunit RPC10-like [Camellia sinensis]	-	Transcription factor S-II (TFIIS)	-	-	-	K03019|RPC11, POLR3K; DNA-directed RNA polymerase III subunit RPC11	ko03020(Genetic Information Processing);ko04623(Organismal Systems)
TR48794_c1_g1	0	10.84	-5.8823	down	0.00071856	0.023965	ribosomal protein 60S [Acaromyces ingoldii]|PWN91800.1 ribosomal protein 60S [Acaromyces ingoldii]	60S acidic ribosomal protein P1 OS=Zea mays OX=4577 GN=RPP1A PE=1 SV=1	60s Acidic ribosomal protein	-	-	-	-	-
TR36625_c0_g2	9.67	0	5.7868	up	0.00071717	0.023922	putative disease resistance protein At3g14460 [Camellia sinensis]	-	Leucine Rich repeats (2 copies)	-	-	-	-	-
TR41654_c0_g2	9.67	0	5.7868	up	0.00071717	0.023922	protein NRT1/ PTR FAMILY 3.1-like [Camellia sinensis]	Protein NRT1/ PTR FAMILY 3.1 OS=Arabidopsis thaliana OX=3702 GN=NPF3.1 PE=2 SV=1	POT family	-	-	-	-	-
TR22777_c0_g2	16.53	0.64	4.7013	up	0.00071577	0.023882	uncharacterized protein LOC114276834 [Camellia sinensis]	-	-	-	-	-	-	-
TR14841_c0_g1	610.84	303.21	1.0107	up	0.00071552	0.023876	protein BOLA4, chloroplastic/mitochondrial isoform X3 [Camellia sinensis]	-	-	-	-	-	-	-
TR4859_c2_g1	15.93	56.03	-1.813	down	0.00071536	0.023874	uncharacterized protein LOC114278665 [Camellia sinensis]	-	-	-	-	-	-	-
TR57266_c0_g1	0	10.35	-5.8143	down	0.00071519	0.023872	senescence-associated carboxylesterase 101 [Camellia sinensis]	-	-	-	-	-	-	-
TR103747_c0_g2	9.68	0	5.7877	up	0.00071511	0.023872	-	-	-	-	-	-	-	-
TR42876_c0_g1	9.68	0	5.7877	up	0.00071511	0.023872	-	-	-	-	-	-	-	-
TR67823_c0_g1	0	10.33	-5.8124	down	0.0007148	0.023868	receptor-like serine/threonine-protein kinase SD1-8 [Camellia sinensis]	-	-	-	-	-	-	-
TR257_c0_g1	5654.83	2813.14	1.0073	up	0.00071435	0.023859	alpha-glucan water dikinase, chloroplastic-like [Camellia sinensis]	Alpha-glucan water dikinase, chloroplastic OS=Solanum tuberosum OX=4113 GN=R1 PE=1 SV=2	Pyruvate phosphate dikinase, PEP/pyruvate binding domain	-	-	-	-	-
TR13272_c0_g1	44.42	10.7	2.049	up	0.00071433	0.023859	mitochondrial fission protein ELM1-like isoform X1 [Camellia sinensis]	Mitochondrial fission protein ELM1 OS=Arabidopsis thaliana OX=3702 GN=ELM1 PE=1 SV=1	-	-	-	-	-	-
TR8043_c0_g1	293.26	125.87	1.2205	up	0.00071375	0.023846	-	-	-	-	-	-	-	-
TR76116_c0_g1	9.7	0	5.7908	up	0.00071324	0.023832	-	-	-	-	-	-	-	-
TR11819_c3_g1	200.46	85.19	1.2352	up	0.00071279	0.02382	plasma membrane ATPase 1-like [Camellia sinensis]	ATPase 11, plasma membrane-type OS=Arabidopsis thaliana OX=3702 GN=AHA11 PE=1 SV=1	Cation transporter/ATPase, N-terminus;E1-E2 ATPase	-	-	-	-	-
TR46239_c0_g1	41.43	8.92	2.2168	up	0.00071235	0.023809	diaminopimelate decarboxylase 1, chloroplastic-like [Camellia sinensis]	Diaminopimelate decarboxylase 2, chloroplastic OS=Arabidopsis thaliana OX=3702 GN=LYSA2 PE=1 SV=1	-	-	-	-	K01586|lysA; diaminopimelate decarboxylase [EC:4.1.1.20]	ko00300(Metabolism);ko01100(Metabolism);ko01110(Metabolism);ko01120(Metabolism);ko01230(Metabolism)
TR10799_c0_g1	0	10.18	-5.7886	down	0.00071125	0.023777	-	-	-	-	-	-	-	-
TR6593_c0_g1	13.24	51	-1.9432	down	0.00071111	0.023777	Protein GAMETE EXPRESSED 1 like [Actinidia chinensis var. chinensis]	Protein GAMETE EXPRESSED 1 OS=Arabidopsis thaliana OX=3702 GN=GEX1 PE=1 SV=1	-	-	-	-	-	-
TR1726_c0_g1	195.29	539.72	-1.467	down	0.0007113	0.023777	G-type lectin S-receptor-like serine/threonine-protein kinase SD2-5 [Camellia sinensis]	G-type lectin S-receptor-like serine/threonine-protein kinase SD2-5 OS=Arabidopsis thaliana OX=3702 GN=SD25 PE=1 SV=1	Protein kinase domain;Protein tyrosine kinase;D-mannose binding lectin;PAN-like domain	-	-	-	-	-
TR1251_c2_g1	479.99	1205.1	-1.328	down	0.00071065	0.023765	shikimate O-hydroxycinnamoyltransferase-like [Camellia sinensis]	Shikimate O-hydroxycinnamoyltransferase OS=Nicotiana tabacum OX=4097 GN=HST PE=1 SV=1	Transferase family	-	-	-	K13065|E2.3.1.133, HCT; shikimate O-hydroxycinnamoyltransferase [EC:2.3.1.133]	ko00940(Metabolism);ko00941(Metabolism);ko00945(Metabolism);ko01100(Metabolism);ko01110(Metabolism)
TR2499_c1_g1	59.69	150.03	-1.3273	down	0.00070998	0.023745	disease resistance protein RGA2-like [Camellia sinensis]	Putative disease resistance protein At1g50180 OS=Arabidopsis thaliana OX=3702 GN=At1g50180 PE=3 SV=2	-	-	-	-	-	-
TR28975_c0_g1	17.22	0.65	4.7502	up	0.00070953	0.023733	protein CELLULOSE SYNTHASE INTERACTIVE 3 [Carica papaya]|XP_021904355.1 protein CELLULOSE SYNTHASE INTERACTIVE 3 [Carica papaya]|XP_021904356.1 protein CELLULOSE SYNTHASE INTERACTIVE 3 [Carica papaya]|XP_021904357.1 protein CELLULOSE SYNTHASE INTERACTIVE 3 [Carica papaya]|XP_021904358.1 protein CELLULOSE SYNTHASE INTERACTIVE 3 [Carica papaya]|XP_021904359.1 protein CELLULOSE SYNTHASE INTERACTIVE …	-	Armadillo/beta-catenin-like repeat;HEAT repeats;HEAT repeat;Armadillo-like	-	-	-	-	-
TR13263_c0_g1	9.71	0	5.7926	up	0.00070917	0.023725	pyruvate dehydrogenase E1 component subunit beta-1, mitochondrial [Asparagus officinalis]|ONK77888.1 uncharacterized protein A4U43_C02F11910 [Asparagus officinalis]	Pyruvate dehydrogenase E1 component subunit beta, mitochondrial OS=Pisum sativum OX=3888 PE=2 SV=1	-	-	-	-	-	-
TR13867_c2_g1	9.71	0	5.7926	up	0.00070917	0.023725	-	-	-	-	-	-	-	-
TR33855_c0_g1	9.71	0	5.7926	up	0.00070917	0.023725	-	-	-	-	-	-	-	-
TR11481_c0_g2	13.3	0.32	5.2852	up	0.00070861	0.023715	-	-	-	-	-	-	-	-
TR2648_c0_g2	13.74	55.93	-2.0184	down	0.00070835	0.02371	calmodulin-binding transcription activator 3-like, partial [Camellia sinensis]	Calmodulin-binding transcription activator 3 OS=Arabidopsis thaliana OX=3702 GN=CAMTA3 PE=1 SV=1	-	-	-	-	-	-
TR4608_c0_g1	173.66	73.77	1.2352	up	0.00070824	0.023709	thioredoxin O2, mitochondrial-like [Camellia sinensis]	Thioredoxin O1, mitochondrial OS=Arabidopsis thaliana OX=3702 GN=At2g35010 PE=2 SV=1	Thioredoxin	-	-	-	K03671|trxA; thioredoxin 1	ko04621(Organismal Systems)
TR2988_c0_g1	74.92	22.75	1.7176	up	0.00070801	0.023705	zinc finger CCCH domain-containing protein 39-like [Camellia sinensis]|XP_028108198.1 zinc finger CCCH domain-containing protein 39-like [Camellia sinensis]	Zinc finger CCCH domain-containing protein 39 OS=Arabidopsis thaliana OX=3702 GN=At3g19360 PE=2 SV=1	Zinc finger C-x8-C-x5-C-x3-H type (and similar);Torus domain	-	-	-	-	-
TR10149_c0_g2	47.77	11.7	2.0283	up	0.00070765	0.023696	probable E3 ubiquitin-protein ligase bre1 [Camellia sinensis]	-	-	-	-	-	-	-
TR3787_c0_g1	75.11	176.65	-1.2345	down	0.00070745	0.023692	uncharacterized protein LOC114276534 isoform X1 [Camellia sinensis]	-	Development and cell death domain	-	-	-	-	-
TR6465_c0_g1	23.35	1.97	3.5909	up	0.00070722	0.023688	-	-	-	-	-	-	-	-
TR97512_c0_g2	9.71	0	5.7917	up	0.00070655	0.023669	uncharacterized protein LOC114303275 [Camellia sinensis]	-	-	-	-	-	-	-
TR40750_c0_g1	9.74	0	5.7966	up	0.00070634	0.023665	-	-	-	-	-	-	-	-
TR23244_c0_g1	22.19	1.94	3.5315	up	0.00070624	0.023664	uncharacterized protein LOC114263452 [Camellia sinensis]	-	-	-	-	-	-	-
TR36417_c0_g1	1.93	21.79	-3.4707	down	0.00070606	0.023662	-	-	-	-	-	-	-	-
TR64303_c0_g1	32.17	100.18	-1.6401	down	0.00070567	0.023652	fasciclin-like arabinogalactan protein 11 [Camellia sinensis]	Fasciclin-like arabinogalactan protein 11 OS=Arabidopsis thaliana OX=3702 GN=FLA11 PE=2 SV=2	Fasciclin domain	-	-	-	-	-
TR14051_c0_g1	14.86	58.3	-1.9685	down	0.00070492	0.02363	TMV resistance protein N-like [Camellia sinensis]	-	Leucine rich repeat;Leucine Rich repeats (2 copies);Leucine Rich Repeat	-	-	-	-	-
TR49174_c1_g1	0	10.33	-5.808	down	0.00070461	0.023623	uncharacterized protein LOC114315395 isoform X3 [Camellia sinensis]	-	-	-	-	-	-	-
TR74932_c0_g1	9.87	0	5.8173	up	0.00070435	0.023621	CWF19-like protein 2 isoform X2 [Camellia sinensis]	-	-	-	-	-	-	-
TR8657_c0_g1	50.98	0.33	7.2232	up	0.00070436	0.023621	hypothetical protein AC579_1315 [Pseudocercospora musae]	-	BTB/POZ domain	-	-	-	-	-
TR17431_c1_g1	0	10.33	-5.8078	down	0.00070368	0.023604	-	-	-	-	-	-	-	-
TR140204_c0_g1	48.61	153.65	-1.6627	down	0.00070332	0.023595	cytochrome P450 87A3-like [Camellia sinensis]	Cytochrome P450 87A3 OS=Oryza sativa subsp. japonica OX=39947 GN=CYP87A3 PE=2 SV=3	Cytochrome P450	-	-	-	-	-
TR6540_c1_g1	68.84	173.11	-1.3305	down	0.00070269	0.023577	uncharacterized protein LOC114310016 isoform X2 [Camellia sinensis]	-	ASCH domain	-	-	-	-	-
TR60303_c0_g2	10.08	0	5.8456	up	0.00070027	0.023502	-	-	-	-	-	-	-	-
TR4582_c0_g1	28.81	4.72	2.6056	up	0.0006997	0.023486	scarecrow-like transcription factor PAT1 [Camellia sinensis]	Scarecrow-like transcription factor PAT1 OS=Arabidopsis thaliana OX=3702 GN=PAT1 PE=2 SV=1	GRAS domain family	-	-	-	-	-
TR133_c4_g1	1.62	19.88	-3.5957	down	0.0006994	0.023479	disease resistance RPP13-like protein 4 [Camellia sinensis]|XP_028086471.1 disease resistance RPP13-like protein 4 [Camellia sinensis]	-	Seryl-tRNA synthetase N-terminal domain	-	-	-	-	-
TR6_c1_g1	11	45.35	-2.0438	down	0.0006992	0.023476	uncharacterized protein LOC114266775 isoform X1 [Camellia sinensis]	-	Plant protein of unknown function (DUF639)	-	-	-	-	-
TR32724_c0_g4	0	10.61	-5.8504	down	0.00069841	0.023452	-	-	-	-	-	-	-	-
TR48485_c0_g1	0	10.13	-5.7829	down	0.0006975	0.023425	-	-	-	-	-	-	-	-
TR14_c0_g2	0.68	17.12	-4.6728	down	0.00069737	0.023424	-	-	-	-	-	-	-	-
TR30527_c0_g1	1.31	19.18	-3.8599	down	0.00069612	0.023385	histone-lysine N-methyltransferase SUVR4-like [Camellia sinensis]|XP_028114794.1 histone-lysine N-methyltransferase SUVR4-like [Camellia sinensis]	-	-	-	-	-	-	-
TR13783_c1_g1	0	10.29	-5.8069	down	0.00069528	0.023361	-	-	-	-	-	-	-	-
TR62917_c0_g1	2.38	22.04	-3.2262	down	0.00069532	0.023361	-	-	-	-	-	-	-	-
TR45415_c1_g1	3.27	27.62	-3.069	down	0.00069479	0.023349	-	-	-	-	-	-	-	-
TR57267_c0_g1	0.68	17.29	-4.6852	down	0.00069315	0.023301	ER membrane protein complex subunit 4-like [Cynara cardunculus var. scolymus]|KVI04943.1 Protein of unknown function DUF1077, TMEM85 [Cynara cardunculus var. scolymus]	-	-	-	-	-	-	-
TR47971_c0_g1	57.13	9.09	2.6463	up	0.00069257	0.023284	ethylene-responsive transcription factor 5-like [Camellia sinensis]	Ethylene-responsive transcription factor 5 OS=Nicotiana tabacum OX=4097 GN=ERF5 PE=2 SV=1	AP2 domain	-	-	-	-	-
TR939_c6_g1	859.99	1893.98	-1.1389	down	0.00069221	0.023275	IAA-amino acid hydrolase ILR1-like 6 [Camellia sinensis]|XP_028082732.1 IAA-amino acid hydrolase ILR1-like 6 [Camellia sinensis]	IAA-amino acid hydrolase ILR1-like 6 OS=Arabidopsis thaliana OX=3702 GN=ILL6 PE=1 SV=2	Peptidase family M20/M25/M40	-	-	-	-	-
TR8954_c0_g1	447.87	1106.98	-1.3053	down	0.00069173	0.023262	ABC transporter C family member 12-like isoform X1 [Camellia sinensis]|XP_028090841.1 ABC transporter C family member 12-like isoform X1 [Camellia sinensis]|XP_028090842.1 ABC transporter C family member 12-like isoform X1 [Camellia sinensis]	ABC transporter C family member 2 OS=Arabidopsis thaliana OX=3702 GN=ABCC2 PE=1 SV=2	ABC transporter;ABC transporter transmembrane region;RecF/RecN/SMC N terminal domain;50S ribosome-binding GTPase;Domain of unknown function DUF87	-	-	-	-	-
TR11503_c0_g1	95.69	34.42	1.4754	up	0.00069098	0.02324	putative RNA dependent RNA polymerse [Raphanus sativus cryptic virus 2]|ABB04855.1 putative RNA dependent RNA polymerse [Raphanus sativus cryptic virus 2]	-	RNA dependent RNA polymerase	metabolic process;nucleobase-containing compound metabolic process;cellular aromatic compound metabolic process;nitrogen compound metabolic process;biological_process;cellular process;cellular nitrogen compound metabolic process;macromolecule metabolic process;cellular metabolic process;primary metabolic process;heterocycle metabolic process;organic substance metabolic process;nucleic acid metabo…	molecular_function;catalytic activity;transferase activity	-	-	-
TR9345_c1_g1	1485.29	2987.66	-1.0083	down	0.00069052	0.023228	mitogen-activated protein kinase kinase 9-like [Camellia sinensis]	Mitogen-activated protein kinase kinase 9 OS=Arabidopsis thaliana OX=3702 GN=MKK9 PE=1 SV=1	Protein kinase domain;Protein tyrosine kinase	-	-	-	K20604|MKK9; mitogen-activated protein kinase kinase 9 [EC:2.7.12.2]	ko04016(Environmental Information Processing)
TR14947_c0_g1	16.9	0.92	4.166	up	0.00069028	0.023223	-	-	-	-	-	-	-	-
TR35156_c0_g1	17.13	0.92	4.1865	up	0.00068989	0.023213	G-type lectin S-receptor-like serine/threonine-protein kinase At1g61550 [Camellia sinensis]	G-type lectin S-receptor-like serine/threonine-protein kinase At1g61550 OS=Arabidopsis thaliana OX=3702 GN=At1g61550 PE=2 SV=1	D-mannose binding lectin;S-locus glycoprotein domain	-	-	-	-	-
TR33564_c1_g1	11.31	0	6.0161	up	0.0006899	0.023213	uncharacterized protein LOC114294786 [Camellia sinensis]	-	zinc-binding in reverse transcriptase	-	-	-	-	-
TR77467_c0_g2	0	11.95	-6.0235	down	0.0006895	0.023206	40s ribosomal protein s27 [Stemphylium lycopersici]|RAR10864.1 40s ribosomal protein s27 [Stemphylium lycopersici]|RAR15401.1 40s ribosomal protein s27 [Stemphylium lycopersici]	40S ribosomal protein S27-2 OS=Arabidopsis thaliana OX=3702 GN=RPS27B PE=2 SV=2	-	metabolic process;peptide metabolic process;nitrogen compound metabolic process;biological_process;biosynthetic process;macromolecule biosynthetic process;cellular process;gene expression;protein metabolic process;cellular nitrogen compound metabolic process;cellular macromolecule biosynthetic process;peptide biosynthetic process;macromolecule metabolic process;cellular amide metabolic process;am…	molecular_function;structural molecule activity;binding;ion binding;cation binding;metal ion binding;structural constituent of ribosome	intracellular;cellular_component;ribonucleoprotein complex;cell;cytoplasm;protein-containing complex;organelle;non-membrane-bounded organelle;intracellular organelle;intracellular non-membrane-bounded organelle;intracellular part;cytoplasmic part;cell part;ribosome	-	-
TR37182_c2_g1	19.56	1.54	3.6422	up	0.00068884	0.023187	-	-	-	-	-	-	-	-
TR3021_c17_g1	0	10.42	-5.8236	down	0.00068782	0.023156	-	-	-	-	-	-	-	-
TR38290_c0_g1	0	10.42	-5.8236	down	0.00068782	0.023156	-	-	-	-	-	-	-	-
TR91514_c0_g1	9.98	0	5.8327	up	0.00068706	0.023136	NAC domain-containing protein 62-like isoform X2 [Camellia sinensis]	-	-	-	-	-	-	-
TR1114_c1_g1	10.74	0	5.9376	up	0.00068655	0.023122	-	-	-	-	-	-	-	-
TR8394_c3_g1	721.75	92.11	2.9699	up	0.00068503	0.023077	suppressor protein SRP40-like [Camellia sinensis]	-	-	-	-	-	-	-
TR917_c0_g1	348.67	701.46	-1.008	down	0.00068481	0.023073	-	-	-	-	-	-	-	-
TR19780_c0_g1	14.1	0.32	5.3711	up	0.00068441	0.023062	uncharacterized protein LOC114312942 [Camellia sinensis]	-	Reverse transcriptase-like	-	-	-	-	-
TR6104_c3_g1	0	10.31	-5.8089	down	0.00068277	0.023016	uncharacterized protein LOC114294059 [Camellia sinensis]	Uncharacterized mitochondrial protein AtMg00310 OS=Arabidopsis thaliana OX=3702 GN=AtMg00310 PE=4 SV=1	-	-	-	-	-	-
TR7909_c0_g1	214.09	88.78	1.2702	up	0.00068292	0.023016	uncharacterized protein LOC114272218 [Camellia sinensis]	-	Endonuclease/Exonuclease/phosphatase family	-	-	-	-	-
TR27040_c4_g1	10.02	0	5.8374	up	0.00068288	0.023016	putative multidrug resistance protein [Camellia sinensis]	ABC transporter B family member 15 OS=Arabidopsis thaliana OX=3702 GN=ABCB15 PE=3 SV=1	ABC transporter	-	-	-	-	-
TR161407_c0_g1	10.22	0	5.8643	up	0.00068294	0.023016	-	-	-	-	-	-	-	-
TR76150_c0_g1	0.31	14.41	-5.3279	down	0.00068076	0.022955	probable leucine-rich repeat receptor-like protein kinase At1g35710 [Camellia sinensis]	MDIS1-interacting receptor like kinase 2 OS=Arabidopsis thaliana OX=3702 GN=MIK2 PE=1 SV=3	-	-	-	-	-	-
TR3671_c2_g1	50.15	12.66	1.9843	up	0.00068073	0.022955	-	-	-	-	-	-	-	-
TR6847_c0_g1	13.53	0.3	5.3112	up	0.00068077	0.022955	-	-	-	-	-	-	-	-
TR7023_c0_g1	1.39	19.48	-3.8443	down	0.00068003	0.02294	-	-	-	-	-	-	-	-
TR19620_c0_g1	20567.9	9395.67	1.1303	up	0.00067931	0.022918	non-specific lipid-transfer protein 2-like [Camellia sinensis]	Non-specific lipid-transfer protein 2 OS=Prunus armeniaca OX=36596 PE=1 SV=1	Probable lipid transfer	-	-	-	-	-
TR3704_c0_g1	3.72	25.87	-2.8069	down	0.00067792	0.022877	-	-	-	-	-	-	-	-
TR6293_c0_g1	289.96	134.11	1.1133	up	0.00067787	0.022877	rhodanese-like domain-containing protein 6 [Camellia sinensis]	Rhodanese-like domain-containing protein 6 OS=Arabidopsis thaliana OX=3702 GN=STR6 PE=2 SV=1	Rhodanase C-terminal;Serine hydrolase (FSH1)	-	-	-	-	-
TR11016_c0_g1	10.63	0	5.92	up	0.000678	0.022877	-	-	-	-	-	-	-	-
TR3220_c0_g1	111.47	240.07	-1.1061	down	0.00067738	0.022866	two-component response regulator ARR11-like [Camellia sinensis]	Two-component response regulator ORR26 OS=Oryza sativa subsp. japonica OX=39947 GN=RR26 PE=3 SV=2	Response regulator receiver domain;Myb-like DNA-binding domain	-	-	-	K14491|ARR-B; two-component response regulator ARR-B family	ko04075(Environmental Information Processing)
TR5679_c3_g1	1412.89	3291.61	-1.2201	down	0.00067558	0.022808	4-coumarate--CoA ligase-like 5 [Camellia sinensis]	4-coumarate--CoA ligase-like 5 OS=Arabidopsis thaliana OX=3702 GN=4CLL5 PE=1 SV=2	AMP-binding enzyme;AMP-binding enzyme C-terminal domain	-	-	-	K10526|OPCL1; OPC-8:0 CoA ligase 1 [EC:6.2.1.-]	ko00592(Metabolism);ko01100(Metabolism);ko01110(Metabolism)
TR84175_c0_g1	0.31	14.03	-5.2899	down	0.00067472	0.022782	-	-	-	-	-	-	-	-
TR17983_c0_g1	1.59	21.25	-3.7057	down	0.00067447	0.02278	ABC transporter B family member 4-like isoform X2 [Camellia sinensis]	ABC transporter B family member 11 OS=Arabidopsis thaliana OX=3702 GN=ABCB11 PE=2 SV=1	ABC transporter transmembrane region;ABC transporter	-	-	-	-	-
TR22672_c0_g1	16.42	0.62	4.702	up	0.00067457	0.02278	-	-	-	-	-	-	-	-
TR24405_c0_g1	169.99	68.86	1.3039	up	0.00067431	0.022779	uncharacterized protein LOC114317598 [Camellia sinensis]	-	-	-	-	-	-	-
TR70069_c0_g2	11.38	0	6.0186	up	0.00067435	0.022779	uncharacterized protein LOC114286192 [Camellia sinensis]	-	-	-	-	-	-	-
TR170763_c0_g1	1.05	20.32	-4.3177	down	0.00067401	0.022773	flowering-promoting factor 1-like protein 3 [Camellia sinensis]	Flowering-promoting factor 1 OS=Sinapis alba OX=3728 GN=FPF1 PE=2 SV=1	-	-	-	-	-	-
TR20781_c0_g1	7.01	35.52	-2.3414	down	0.00067382	0.02277	WRKY transcription factor 23-like isoform X1 [Camellia sinensis]	Probable WRKY transcription factor 23 OS=Arabidopsis thaliana OX=3702 GN=WRKY23 PE=2 SV=1	-	-	-	-	-	-
TR1599_c0_g1	682.42	1388.46	-1.0248	down	0.00067369	0.022769	cytochrome b561 and DOMON domain-containing protein At3g25290-like [Camellia sinensis]	Cytochrome b561 and DOMON domain-containing protein At3g25290 OS=Arabidopsis thaliana OX=3702 GN=At3g25290 PE=2 SV=1	Protein of unknown function (DUF568);Eukaryotic cytochrome b561	-	-	-	-	-
TR10722_c0_g1	70.94	180.24	-1.3427	down	0.0006735	0.022765	protein LYK5 [Camellia sinensis]	Protein LYK5 OS=Arabidopsis thaliana OX=3702 GN=LYK5 PE=2 SV=1	LysM domain	-	-	-	-	-
TR1797_c5_g1	365.24	898.83	-1.2993	down	0.00067186	0.022715	uncharacterized protein LOC114297396 [Camellia sinensis]	-	Remorin, C-terminal region;Putative serine esterase (DUF676)	-	-	-	-	-
TR13716_c0_g2	19.46	1.27	3.9374	up	0.00067191	0.022715	PKS-NRPS hybrid synthetase CHGG_01239-like [Camellia sinensis]	-	MULE transposase domain;Transposase, Mutator family	-	-	-	-	-
TR2346_c0_g1	1029.21	486.17	1.0823	up	0.00067108	0.022696	abscisate beta-glucosyltransferase-like [Camellia sinensis]	Abscisate beta-glucosyltransferase OS=Phaseolus angularis OX=3914 GN=AOG PE=1 SV=1	UDP-glucoronosyl and UDP-glucosyl transferase;Formin Homology 2 Domain	-	-	-	K14595|AOG; abscisate beta-glucosyltransferase [EC:2.4.1.263]	ko00906(Metabolism);ko01100(Metabolism);ko01110(Metabolism)
TR873_c0_g1	17.02	0.63	4.7448	up	0.00067098	0.022696	oleosin 1-like [Camellia sinensis]	Oleosin 18.5 kDa OS=Arabidopsis thaliana OX=3702 GN=At4g25140 PE=2 SV=1	Oleosin	-	-	-	-	-
TR27622_c0_g1	23.92	2.14	3.4612	up	0.00067035	0.022677	glycosyltransferase, partial [Camellia sinensis]	Hydroquinone glucosyltransferase OS=Rauvolfia serpentina OX=4060 GN=AS PE=1 SV=1	-	-	-	-	-	-
TR7758_c0_g2	20.07	1.88	3.4098	up	0.00066938	0.022647	uncharacterized protein LOC114310374 [Camellia sinensis]	-	-	-	-	-	-	-
TR5764_c0_g2	46.74	11.52	2.0224	up	0.00066883	0.022632	NAD kinase 2, chloroplastic-like isoform X2 [Camellia sinensis]	NAD kinase 2, chloroplastic OS=Arabidopsis thaliana OX=3702 GN=NADK2 PE=1 SV=1	-	-	-	-	K00858|ppnK, NADK; NAD+ kinase [EC:2.7.1.23]	ko00760(Metabolism);ko01100(Metabolism)
TR28992_c0_g1	0	11.11	-5.9147	down	0.00066816	0.022612	LOW QUALITY PROTEIN: probable leucine-rich repeat receptor-like serine/threonine-protein kinase At3g14840 [Camellia sinensis]	-	-	-	-	-	-	-
TR16604_c0_g1	21.35	69.93	-1.7111	down	0.00066789	0.022606	-	-	-	-	-	-	-	-
TR12474_c0_g2	0	10.08	-5.7754	down	0.00066494	0.022509	-	-	-	-	-	-	-	-
TR274_c2_g1	4.18	31.27	-2.8852	down	0.00066398	0.02248	-	-	-	-	-	-	-	-
TR6834_c0_g1	92.25	215.16	-1.2212	down	0.00066395	0.02248	uncharacterized protein LOC114306400 [Camellia sinensis]	-	Protein of unknown function (DUF620)	-	-	-	-	-
TR17221_c0_g1	202.68	470.34	-1.2153	down	0.0006633	0.022463	uncharacterized protein LOC114255921 [Camellia sinensis]	-	-	-	-	-	-	-
TR12724_c0_g1	36.11	3.72	3.2673	up	0.00066312	0.02246	-	-	-	-	-	-	-	-
TR116623_c0_g1	9.88	0	5.8194	up	0.00066276	0.022451	Glutamate receptor 2.7 like [Actinidia chinensis var. chinensis]	-	Receptor family ligand binding region;Periplasmic binding protein	-	-	-	-	-
TR19348_c0_g1	62.19	2.12	4.8563	up	0.00066196	0.022427	-	-	-	-	-	-	-	-
TR5034_c0_g1	157.77	57.02	1.4698	up	0.00065889	0.022329	probable xyloglucan galactosyltransferase GT19 [Camellia sinensis]	Probable xyloglucan galactosyltransferase GT19 OS=Arabidopsis thaliana OX=3702 GN=GT19 PE=2 SV=1	Exostosin family	-	-	-	-	-
TR23062_c0_g1	11.69	0	6.0606	up	0.00065875	0.022327	ABC transporter A family member 2-like [Camellia sinensis]	ABC transporter A family member 2 OS=Arabidopsis thaliana OX=3702 GN=ABCA2 PE=2 SV=1	ABC-2 family transporter protein	-	-	-	-	-
TR10692_c2_g2	1.97	20.49	-3.3663	down	0.00065848	0.022321	-	-	-	-	-	-	-	-
TR48012_c0_g1	0	10.15	-5.7851	down	0.00065702	0.022277	jasmonoyl--L-amino acid synthetase JAR4-like [Camellia sinensis]	Jasmonic acid-amido synthetase JAR1 OS=Oryza sativa subsp. japonica OX=39947 GN=GH3.5 PE=2 SV=1	-	-	-	-	-	-
TR23696_c0_g2	234.88	107.17	1.1322	up	0.00065701	0.022277	box C/D snoRNA protein 1 [Camellia sinensis]	-	HIT zinc finger	-	-	-	-	-
TR58581_c0_g1	0	10.4	-5.8202	down	0.00065611	0.022253	uncharacterized protein LOC114279546 [Camellia sinensis]	-	Retrotransposon gag protein	-	-	-	-	-
TR8948_c0_g1	138.94	38.16	1.8645	up	0.0006555	0.022235	probable UDP-N-acetylglucosamine--peptide N-acetylglucosaminyltransferase SEC [Camellia sinensis]	-	-	-	-	-	-	-
TR20106_c0_g2	10.17	0	5.8569	up	0.00065517	0.022227	-	-	-	-	-	-	-	-
TR15336_c0_g1	2.95	27.77	-3.2244	down	0.00065479	0.022217	-	-	-	-	-	-	-	-
TR81408_c0_g1	20.15	1.23	4.008	up	0.00065461	0.022214	-	-	-	-	-	-	-	-
TR27491_c0_g1	9.99	0	5.834	up	0.00065416	0.022202	-	-	-	-	-	-	-	-
TR36232_c1_g1	0.31	14.91	-5.3802	down	0.00065375	0.022191	-	-	-	-	-	-	-	-
TR104524_c0_g1	1.28	18.97	-3.8561	down	0.00065374	0.022191	tubby-like F-box protein 13 [Camellia sinensis]|XP_028087461.1 tubby-like F-box protein 13 [Camellia sinensis]	Tubby-like F-box protein 1 OS=Arabidopsis thaliana OX=3702 GN=TULP1 PE=2 SV=1	-	-	-	-	-	-
TR10228_c0_g1	61.91	16.24	1.9244	up	0.00065365	0.022191	LOW QUALITY PROTEIN: UPF0481 protein At3g47200-like [Camellia sinensis]	-	Plant protein of unknown function	-	-	-	-	-
TR51385_c0_g1	0.7	17.57	-4.7027	down	0.00065339	0.022188	-	-	-	-	-	-	-	-
TR1539_c2_g1	38.72	6.28	2.6214	up	0.00065336	0.022188	-	-	-	-	-	-	-	-
TR1684_c2_g1	573.63	273.96	1.0664	up	0.0006521	0.02215	UDP-glucuronic acid decarboxylase 1-like [Camellia sinensis]|XP_028055871.1 UDP-glucuronic acid decarboxylase 1-like [Camellia sinensis]	UDP-glucuronic acid decarboxylase 1 OS=Arabidopsis thaliana OX=3702 GN=UXS1 PE=1 SV=1	GDP-mannose 4,6 dehydratase;NAD dependent epimerase/dehydratase family;Male sterility protein;3-beta hydroxysteroid dehydrogenase/isomerase family;RmlD substrate binding domain;Polysaccharide biosynthesis protein	-	-	-	K08678|UXS1, uxs; UDP-glucuronate decarboxylase [EC:4.1.1.35]	ko00520(Metabolism);ko01100(Metabolism)
TR44774_c0_g1	0	10.24	-5.7965	down	0.00065196	0.022148	-	-	-	-	-	-	-	-
TR6667_c0_g1	113.24	305.76	-1.4331	down	0.00065147	0.022134	putative late blight resistance protein homolog R1B-14 isoform X2 [Camellia sinensis]|XP_028098607.1 putative late blight resistance protein homolog R1B-14 isoform X2 [Camellia sinensis]	-	-	-	-	-	-	-
TR733_c0_g1	67.35	166.73	-1.3056	down	0.00065137	0.022134	protein decapping 5-like isoform X3 [Camellia sinensis]	Protein decapping 5 OS=Arabidopsis thaliana OX=3702 GN=DCP5 PE=1 SV=1	Scd6-like Sm domain;FDF domain	-	-	-	-	-
TR1310_c2_g1	11.18	46.05	-2.0362	down	0.00064948	0.022076	-	-	-	-	-	-	-	-
TR38469_c0_g1	0	10.38	-5.818	down	0.00064923	0.02207	-	-	-	-	-	-	-	-
TR69532_c0_g1	2.95	25.8	-3.1179	down	0.0006487	0.022055	cyclin-dependent protein kinase inhibitor SMR6-like [Camellia sinensis]	Cyclin-dependent protein kinase inhibitor SMR6 OS=Arabidopsis thaliana OX=3702 GN=SMR6 PE=1 SV=1	-	-	-	-	-	-
TR49410_c0_g1	7.24	37.42	-2.3648	down	0.00064799	0.022034	-	-	-	-	-	-	-	-
TR17193_c1_g3	0	10.21	-5.7927	down	0.00064786	0.022033	-	-	-	-	-	-	-	-
TR27733_c0_g1	1.67	21.82	-3.7121	down	0.00064761	0.022027	-	-	-	-	-	-	-	-
TR32112_c0_g1	10.15	0	5.8586	up	0.00064758	0.022027	-	Boron transporter 4 OS=Arabidopsis thaliana OX=3702 GN=BOR4 PE=2 SV=1	-	-	-	-	-	-
TR77412_c0_g1	246.3	102.83	1.2593	up	0.00064727	0.022021	homeobox-leucine zipper protein HAT4-like [Camellia sinensis]	Homeobox-leucine zipper protein HAT4 OS=Arabidopsis thaliana OX=3702 GN=HAT4 PE=1 SV=1	HD-ZIP protein N terminus	-	-	-	-	-
TR43122_c0_g1	9.98	0	5.8317	up	0.00064639	0.021995	thioredoxin domain-containing protein PLP3A-like isoform X2 [Camellia sinensis]|XP_028107173.1 thioredoxin domain-containing protein PLP3A-like isoform X2 [Camellia sinensis]|XP_028107174.1 thioredoxin domain-containing protein PLP3A-like isoform X2 [Camellia sinensis]|XP_028107175.1 thioredoxin domain-containing protein PLP3A-like isoform X2 [Camellia sinensis]|XP_028107176.1 thioredoxin domain-…	-	-	-	-	-	-	-
TR49232_c0_g1	10.2	0	5.8614	up	0.00064632	0.021995	cysteine-rich receptor-like protein kinase 10 isoform X1 [Camellia sinensis]	Cysteine-rich repeat secretory protein 4 OS=Arabidopsis thaliana OX=3702 GN=CRRSP4 PE=3 SV=2	Salt stress response/antifungal	-	-	-	-	-
TR20879_c1_g2	0	10.32	-5.8108	down	0.00064527	0.021962	-	-	-	-	-	-	-	-
TR38165_c0_g1	0	10.32	-5.8108	down	0.00064527	0.021962	-	-	-	-	-	-	-	-
TR55348_c0_g1	48.42	8.19	2.5644	up	0.0006451	0.021962	dymeclin-like isoform X2 [Camellia sinensis]	Proteasome activator subunit 4 OS=Arabidopsis thaliana OX=3702 GN=PA200 PE=2 SV=2	-	-	-	-	-	-
TR39668_c0_g1	0.7	17.4	-4.6879	down	0.00064488	0.021958	cysteine-rich receptor-like protein kinase 15 [Camellia sinensis]	Cysteine-rich receptor-like protein kinase 25 OS=Arabidopsis thaliana OX=3702 GN=CRK25 PE=3 SV=1	Salt stress response/antifungal	-	-	-	-	-
TR92284_c0_g1	0	10.22	-5.7944	down	0.00064465	0.021953	TBC1 domain family member 15-like isoform X2 [Camellia sinensis]	-	-	-	-	-	-	-
TR3168_c0_g1	19.85	64.86	-1.7118	down	0.00064386	0.021929	-	-	-	-	-	-	-	-
TR4158_c0_g1	16.34	60.39	-1.8789	down	0.00064311	0.021907	boron transporter 4-like isoform X2 [Camellia sinensis]	Boron transporter 4 OS=Arabidopsis thaliana OX=3702 GN=BOR4 PE=2 SV=1	HCO3- transporter family	-	-	-	-	-
TR46207_c0_g1	10.29	0	5.8768	up	0.00064295	0.021904	uncharacterized protein LOC112492571 [Ziziphus jujuba]	-	-	-	-	-	-	-
TR29005_c1_g4	0	10.28	-5.8021	down	0.00064121	0.021854	uncharacterized protein LOC114266139 isoform X1 [Camellia sinensis]	-	-	-	-	-	-	-
TR35920_c4_g1	0	10.28	-5.8021	down	0.00064121	0.021854	-	-	-	-	-	-	-	-
TR29981_c0_g1	1.05	18.73	-4.2034	down	0.00064129	0.021854	-	-	-	-	-	-	-	-
TR67221_c0_g1	54.13	14.55	1.893	up	0.0006414	0.021854	-	-	-	-	-	-	-	-
TR88571_c0_g2	0	10.63	-5.8497	down	0.00064016	0.021824	-	-	-	-	-	-	-	-
TR17009_c0_g1	10.05	0	5.8413	up	0.00063986	0.021817	-	-	-	-	-	-	-	-
TR4926_c2_g1	10.05	0	5.8413	up	0.00063986	0.021817	-	-	-	-	-	-	-	-
TR35252_c0_g1	0	10.32	-5.8107	down	0.00063962	0.021814	hypothetical protein GOBAR_AA01251 [Gossypium barbadense]	K(+) efflux antiporter 1, chloroplastic OS=Arabidopsis thaliana OX=3702 GN=KEA1 PE=1 SV=2	-	-	-	-	-	-
TR497_c0_g2	105.51	267.65	-1.3437	down	0.00063962	0.021814	Phosphatidylinositol/phosphatidylcholine transfer protein [Actinidia chinensis var. chinensis]	-	CRAL/TRIO domain	-	-	-	-	-
TR55511_c0_g1	25.28	2.84	3.1497	up	0.00063901	0.0218	-	-	-	-	-	-	-	-
TR46834_c0_g1	0	10.11	-5.7792	down	0.00063834	0.02178	-	-	-	-	-	-	-	-
TR15_c1_g2	51.75	156.17	-1.5921	down	0.00063779	0.021764	protein DETOXIFICATION 12-like isoform X1 [Camellia sinensis]	Protein DETOXIFICATION 14 OS=Arabidopsis thaliana OX=3702 GN=DTX14 PE=1 SV=1	MatE	-	-	-	-	-
TR20784_c0_g1	10.45	0	5.8968	up	0.00063773	0.021764	uncharacterized protein LOC114263864 [Camellia sinensis]	-	-	-	-	-	-	-
TR27315_c0_g1	33.35	5.16	2.7022	up	0.00063711	0.02175	probable isoprenylcysteine alpha-carbonyl methylesterase ICMEL1 isoform X1 [Camellia sinensis]	Probable isoprenylcysteine alpha-carbonyl methylesterase ICMEL1 OS=Arabidopsis thaliana OX=3702 GN=ICMEL1 PE=2 SV=1	-	-	-	-	-	-
TR4671_c0_g1	1987.2	4585.5	-1.2064	down	0.00063685	0.021746	hyoscyamine 6-dioxygenase-like [Camellia sinensis]	Hyoscyamine 6-dioxygenase OS=Hyoscyamus niger OX=4079 GN=H6H PE=1 SV=1	non-haem dioxygenase in morphine synthesis N-terminal;2OG-Fe(II) oxygenase superfamily	-	-	-	-	-
TR3004_c3_g1	65.79	19.73	1.7391	up	0.00063691	0.021746	mitogen-activated protein kinase kinase kinase 1-like [Camellia sinensis]|XP_028095537.1 mitogen-activated protein kinase kinase kinase 1-like [Camellia sinensis]	-	-	-	-	-	-	-
TR10874_c0_g1	39.2	7.67	2.3574	up	0.00063574	0.021712	uncharacterized protein LOC114283475 isoform X1 [Camellia sinensis]	-	-	-	-	-	-	-
TR67480_c1_g2	0	10.19	-5.7906	down	0.00063539	0.021704	probable anion transporter 6, chloroplastic [Camellia sinensis]	Probable anion transporter 5, chloroplastic OS=Oryza sativa subsp. japonica OX=39947 GN=PHT4	-	-	-	-	-	-
TR56858_c0_g1	10.18	0	5.8587	up	0.00063543	0.021704	uncharacterized protein LOC114274901 [Camellia sinensis]	-	-	-	-	-	-	-
TR101519_c1_g1	10.48	0	5.9045	up	0.00063475	0.021687	uncharacterized protein LOC114266503 [Camellia sinensis]	-	Retroviral aspartyl protease	-	-	-	-	-
TR11945_c0_g1	539.82	239.18	1.1741	up	0.00063451	0.021681	putative receptor protein kinase ZmPK1 [Camellia sinensis]	Putative receptor protein kinase ZmPK1 OS=Zea mays OX=4577 GN=PK1 PE=2 SV=2	Protein kinase domain;Protein tyrosine kinase;D-mannose binding lectin;S-locus glycoprotein domain	-	-	-	-	-
TR585_c0_g1	85.07	200.83	-1.2379	down	0.00063432	0.021678	filaggrin-2 [Camellia sinensis]|XP_028053636.1 filaggrin-2 [Camellia sinensis]	-	-	-	-	-	K14398|CPSF6_7; cleavage and polyadenylation specificity factor subunit 6/7	ko03015(Genetic Information Processing)
TR61462_c0_g4	10.63	0	5.9268	up	0.00063428	0.021678	-	-	-	-	-	-	-	-
TR14127_c0_g1	552.77	266.09	1.0548	up	0.00063398	0.021672	probable LRR receptor-like serine/threonine-protein kinase At1g67720 [Camellia sinensis]	Leucine-rich repeat receptor-like serine/threonine-protein kinase At2g14510 OS=Arabidopsis thaliana OX=3702 GN=At2g14510 PE=2 SV=1	Carbohydrate-binding protein of the ER;Leucine rich repeat N-terminal domain;Di-glucose binding within endoplasmic reticulum	-	-	-	-	-
TR638_c0_g1	5.57	31.59	-2.4951	down	0.000633	0.021644	-	-	-	-	-	-	-	-
TR287_c5_g1	18.93	1	4.2863	up	0.00063306	0.021644	squalene monooxygenase-like [Camellia sinensis]	-	-	-	-	-	-	-
TR14367_c0_g1	120.24	587.01	-2.2877	down	0.00063279	0.02164	(+)-neomenthol dehydrogenase-like isoform X2 [Camellia sinensis]	(+)-neomenthol dehydrogenase OS=Arabidopsis thaliana OX=3702 GN=SDR1 PE=1 SV=1	short chain dehydrogenase;Enoyl-(Acyl carrier protein) reductase	-	-	-	-	-
TR619_c1_g1	187.72	540.29	-1.5246	down	0.00063212	0.021621	Splicing factor, arginine/serine-rich 7 [Actinidia chinensis var. chinensis]	-	-	-	-	-	-	-
TR13010_c1_g2	0	10.25	-5.7983	down	0.00063175	0.021611	-	-	-	-	-	-	-	-
TR2189_c0_g1	49.74	13.63	1.8669	up	0.00063163	0.02161	uncharacterized protein LOC114260283 isoform X1 [Camellia sinensis]	-	-	-	-	-	-	-
TR279_c0_g2	10.99	0	5.9676	up	0.00063099	0.021591	-	-	-	-	-	-	-	-
TR62276_c0_g1	8.04	43.1	-2.426	down	0.00063057	0.021579	LOW QUALITY PROTEIN: receptor-like protein kinase 7 [Camellia sinensis]	Receptor-like protein kinase 7 OS=Arabidopsis thaliana OX=3702 GN=RLK7 PE=1 SV=1	-	-	-	-	-	-
TR30916_c1_g1	1.05	19.18	-4.2365	down	0.00062909	0.021532	-	-	-	-	-	-	-	-
TR7957_c0_g1	26.22	84.49	-1.691	down	0.0006286	0.02152	uncharacterized protein LOC114260023 [Camellia sinensis]	-	Domain of unknown function (DUF4378);Protein of unknown function (DUF3741)	-	-	-	-	-
TR3742_c3_g1	83.2	27.14	1.618	up	0.00062867	0.02152	uncharacterized protein LOC114311529 [Camellia sinensis]	-	zinc-binding in reverse transcriptase	-	-	-	-	-
TR13801_c4_g2	0	10.12	-5.7811	down	0.00062815	0.021508	PREDICTED: glyceraldehyde-3-phosphate dehydrogenase 2, cytosolic [Tarenaya hassleriana]	Glyceraldehyde-3-phosphate dehydrogenase 1, cytosolic OS=Hordeum vulgare OX=4513 GN=GAPC PE=2 SV=1	-	-	-	-	-	-
TR14736_c0_g1	0	10.12	-5.7811	down	0.00062815	0.021508	two-component response regulator ARR14-like [Camellia sinensis]	Putative two-component response regulator ARR21 OS=Arabidopsis thaliana OX=3702 GN=ARR21 PE=2 SV=3	-	-	-	-	K14491|ARR-B; two-component response regulator ARR-B family	ko04075(Environmental Information Processing)
TR2310_c2_g1	10.65	0	5.9266	up	0.00062804	0.021508	-	-	-	-	-	-	-	-
TR3183_c0_g1	15.33	54.37	-1.8273	down	0.00062709	0.021481	PREDICTED: 40S ribosomal protein S19-3-like [Malus domestica]|RXH96422.1 hypothetical protein DVH24_008926 [Malus domestica]	40S ribosomal protein S19-3 OS=Arabidopsis thaliana OX=3702 GN=RPS19C PE=2 SV=1	-	-	-	-	-	-
TR59778_c0_g1	9.94	0	5.8272	up	0.00062709	0.021481	PREDICTED: uncharacterized protein LOC107858972 [Capsicum annuum]	Retrovirus-related Pol polyprotein from transposon RE1 OS=Arabidopsis thaliana OX=3702 GN=RE1 PE=2 SV=1	gag-polypeptide of LTR copia-type;gag-polypeptide of LTR copia-type	-	-	-	-	-
TR184486_c0_g1	0.34	14.44	-5.3306	down	0.00062691	0.02148	S-norcoclaurine synthase 2-like [Camellia sinensis]	S-norcoclaurine synthase 2 OS=Papaver somniferum OX=3469 GN=NCS2 PE=1 SV=1	Pathogenesis-related protein Bet v I family;Polyketide cyclase / dehydrase and lipid transport	-	-	-	-	-
TR14440_c0_g2	6.07	33.95	-2.49	down	0.0006263	0.021462	putative late blight resistance protein homolog R1A-10 [Camellia sinensis]	-	-	-	-	-	-	-
TR1739_c1_g1	333.11	666.11	-1.0002	down	0.00062613	0.021459	arogenate dehydratase/prephenate dehydratase 1, chloroplastic-like isoform X1 [Camellia sinensis]|XP_028120040.1 arogenate dehydratase/prephenate dehydratase 1, chloroplastic-like isoform X2 [Camellia sinensis]	Arogenate dehydratase/prephenate dehydratase 1, chloroplastic OS=Arabidopsis thaliana OX=3702 GN=ADT1 PE=1 SV=1	Prephenate dehydratase;ACT domain	-	-	-	K05359|ADT, PDT; arogenate/prephenate dehydratase [EC:4.2.1.91 4.2.1.51]	ko00400(Metabolism);ko01100(Metabolism);ko01110(Metabolism);ko01230(Metabolism)
TR2192_c0_g2	10.9	0	5.9604	up	0.00062611	0.021459	PREDICTED: uncharacterized protein LOC105041831 [Elaeis guineensis]	ABC transporter G family member 3 OS=Arabidopsis thaliana OX=3702 GN=ABCG3 PE=1 SV=2	-	-	-	-	-	-
TR60553_c0_g1	13.84	0.3	5.3436	up	0.00062579	0.021454	UDP-URONIC ACID TRANSPORTER 1 [Camellia sinensis]	Probable sugar phosphate/phosphate translocator At3g10290 OS=Arabidopsis thaliana OX=3702 GN=At3g10290 PE=3 SV=1	-	-	-	-	-	-
TR4780_c0_g1	169.81	67.21	1.3392	up	0.00062558	0.02145	PREDICTED: G-type lectin S-receptor-like serine/threonine-protein kinase SD2-5 [Vitis vinifera]	G-type lectin S-receptor-like serine/threonine-protein kinase SD2-5 OS=Arabidopsis thaliana OX=3702 GN=SD25 PE=1 SV=1	Protein kinase domain;Protein tyrosine kinase	-	-	-	-	-
TR36427_c0_g2	3.7	25.75	-2.8054	down	0.00062523	0.021441	-	-	-	-	-	-	-	-
TR32155_c1_g2	73.07	18.21	2.0002	up	0.0006241	0.021405	aquaporin TIP2-1 [Camellia sinensis]	Aquaporin TIP2-1 OS=Arabidopsis thaliana OX=3702 GN=TIP2-1 PE=1 SV=2	Major intrinsic protein	-	-	-	-	-
TR35065_c1_g1	0.69	19.07	-4.8208	down	0.0006237	0.021394	3-ketoacyl-CoA synthase 11-like [Camellia sinensis]	3-ketoacyl-CoA synthase 11 OS=Arabidopsis thaliana OX=3702 GN=KCS11 PE=1 SV=1	FAE1/Type III polyketide synthase-like protein	-	-	-	-	-
TR3456_c0_g3	4.61	31.46	-2.7646	down	0.00062293	0.021376	orf114a gene product (mitochondrion) [Beta vulgaris subsp. vulgaris]|YP_004222305.1 hypothetical protein BevumaM_p070 (mitochondrion) [Beta vulgaris subsp. maritima]|YP_004842110.1 hypothetical protein BemaM_p065 (mitochondrion) [Beta macrocarpa]|BAA99288.1 orf114a (mitochondrion) [Beta vulgaris subsp. vulgaris]|CBJ14041.1 hypothetical protein (mitochondrion) [Beta vulgaris subsp. maritima]|CBJ17…	-	-	-	-	-	-	-
TR13669_c0_g1	8.03	39.86	-2.3135	down	0.00062307	0.021376	-	-	-	-	-	-	-	-
TR68683_c0_g1	13.85	0.32	5.3411	up	0.00062309	0.021376	-	-	-	-	-	-	-	-
TR7106_c0_g2	16.17	58.55	-1.8608	down	0.00062273	0.021372	-	-	-	-	-	-	-	-
TR746_c3_g1	1953.91	4270.46	-1.1281	down	0.00062237	0.021363	thioredoxin F-type, chloroplastic-like [Camellia sinensis]	Thioredoxin F2, chloroplastic OS=Arabidopsis thaliana OX=3702 GN=At5g16400 PE=2 SV=1	Thioredoxin	-	-	-	K03671|trxA; thioredoxin 1	ko04621(Organismal Systems)
TR1511_c2_g1	48.04	166.6	-1.7946	down	0.00062221	0.02136	G-type lectin S-receptor-like serine/threonine-protein kinase At1g61550 isoform X1 [Camellia sinensis]	G-type lectin S-receptor-like serine/threonine-protein kinase At1g11330 OS=Arabidopsis thaliana OX=3702 GN=At1g11330 PE=1 SV=3	Domain of unknown function (DUF3403)	-	-	-	-	-
TR30288_c0_g1	23.34	2.84	3.0341	up	0.0006222	0.02136	-	-	-	-	-	-	-	-
TR17967_c2_g1	10.39	0	5.8932	up	0.0006207	0.021314	-	-	-	-	-	-	-	-
TR48791_c1_g1	6.02	34.81	-2.5346	down	0.00062042	0.021311	uncharacterized protein LOC114322241 [Camellia sinensis]	E3 ubiquitin-protein ligase SINAT2 OS=Arabidopsis thaliana OX=3702 GN=SINAT2 PE=1 SV=1	-	-	-	-	-	-
TR8570_c0_g1	20.11	1.53	3.6868	up	0.00062052	0.021311	expansin-A8-like [Camellia sinensis]	Expansin-A8 OS=Arabidopsis thaliana OX=3702 GN=EXPA8 PE=2 SV=1	Lytic transglycolase	-	-	-	-	-
TR29954_c0_g1	14.74	0.33	5.4353	up	0.00062025	0.021308	-	-	-	-	-	-	-	-
TR15634_c0_g1	0	11.37	-5.9495	down	0.00062006	0.021304	-	-	-	-	-	-	-	-
TR6113_c1_g1	10.52	48.14	-2.1903	down	0.00061971	0.021296	lactosylceramide 4-alpha-galactosyltransferase-like [Camellia sinensis]	Uncharacterized protein At4g19900 OS=Arabidopsis thaliana OX=3702 GN=At4g19900 PE=2 SV=1	Alpha 1,4-glycosyltransferase conserved region;Glycosyltransferase sugar-binding region containing DXD motif	-	-	-	K01988|A4GALT; lactosylceramide 4-alpha-galactosyltransferase [EC:2.4.1.228]	ko00601(Metabolism);ko00603(Metabolism);ko01100(Metabolism)
TR88743_c0_g1	692.3	274.38	1.3346	up	0.00061972	0.021296	arogenate dehydratase/prephenate dehydratase 6, chloroplastic-like [Camellia sinensis]	Arogenate dehydratase/prephenate dehydratase 6, chloroplastic OS=Arabidopsis thaliana OX=3702 GN=ADT6 PE=1 SV=1	Prephenate dehydratase	-	-	-	K05359|ADT, PDT; arogenate/prephenate dehydratase [EC:4.2.1.91 4.2.1.51]	ko00400(Metabolism);ko01100(Metabolism);ko01110(Metabolism);ko01230(Metabolism)
TR21804_c0_g2	9.97	0	5.831	up	0.00061976	0.021296	-	-	-	-	-	-	-	-
TR30477_c0_g1	9.97	0	5.831	up	0.00061976	0.021296	-	-	-	-	-	-	-	-
TR4290_c1_g1	0	10.24	-5.7964	down	0.00061924	0.02129	-	-	-	-	-	-	-	-
TR12766_c0_g1	3.65	25.8	-2.8176	down	0.00061924	0.02129	-	Glutamine synthetase cytosolic isozyme 1 OS=Glycine max OX=3847 PE=2 SV=1	-	-	-	-	-	-
TR2056_c0_g1	584.98	288.56	1.0195	up	0.00061863	0.021275	protein BTR1-like [Camellia sinensis]	Protein BTR1 OS=Arabidopsis thaliana OX=3702 GN=BTR1 PE=1 SV=1	KH domain;KH domain;KH domain	-	-	-	-	-
TR5031_c0_g1	581.01	280.32	1.0512	up	0.00061824	0.021265	hypothetical protein [Hypochaeris radicata]	Uncharacterized protein At2g23090 OS=Arabidopsis thaliana OX=3702 GN=At2g23090 PE=1 SV=1	-	-	-	-	-	-
TR498_c0_g3	6.51	38.25	-2.5684	down	0.0006178	0.021253	-	Ras-related protein RIC2 OS=Oryza sativa subsp. japonica OX=39947 GN=RIC2 PE=2 SV=2	-	-	-	-	-	-
TR30024_c0_g1	0	11.81	-5.9997	down	0.00061738	0.021241	hypothetical protein RSOLAG1IB_01608 [Rhizoctonia solani AG-1 IB]	-	-	-	-	-	-	-
TR63471_c0_g1	10.14	0	5.8537	up	0.0006168	0.021224	sterol 3-beta-glucosyltransferase UGT80A2 isoform X1 [Quercus suber]|XP_023922989.1 sterol 3-beta-glucosyltransferase UGT80A2 isoform X2 [Quercus suber]	Sterol 3-beta-glucosyltransferase UGT80A2 OS=Arabidopsis thaliana OX=3702 GN=UGT80A2 PE=1 SV=1	-	-	-	-	-	-
TR5835_c0_g1	15.79	60.32	-1.9364	down	0.00061658	0.021219	cysteine synthase-like isoform X2 [Camellia sinensis]	Bifunctional L-3-cyanoalanine synthase/cysteine synthase D2 OS=Arabidopsis thaliana OX=3702 GN=CYSD2 PE=1 SV=1	-	-	-	-	K01738|cysK; cysteine synthase [EC:2.5.1.47]	ko00270(Metabolism);ko00920(Metabolism);ko01100(Metabolism);ko01110(Metabolism);ko01120(Metabolism);ko01200(Metabolism);ko01230(Metabolism)
TR10265_c0_g1	39.1	7.29	2.4232	up	0.00061645	0.021218	F-box/kelch-repeat protein At3g06240-like isoform X1 [Camellia sinensis]|XP_028070693.1 F-box/kelch-repeat protein At3g06240-like isoform X1 [Camellia sinensis]	-	-	-	-	-	-	-
TR2841_c3_g1	574.83	1202.18	-1.0647	down	0.00061542	0.021185	dnaJ protein ERDJ3A-like [Camellia sinensis]	DnaJ protein ERDJ3A OS=Arabidopsis thaliana OX=3702 GN=ERDJ3A PE=1 SV=1	DnaJ domain	-	-	-	-	-
TR1620_c1_g1	51.72	128.53	-1.3137	down	0.00061524	0.021182	uncharacterized protein LOC114308822 [Camellia sinensis]|XP_028105302.1 uncharacterized protein LOC114304343 [Camellia sinensis]	-	-	-	-	-	-	-
TR8247_c0_g2	22.8	2.25	3.3465	up	0.00061476	0.021168	-	-	-	-	-	-	-	-
TR18904_c0_g1	20.36	0.61	5.0244	up	0.00061468	0.021168	anthocyanidin 3-O-glucosyltransferase 2-like [Camellia sinensis]	Putative UDP-glucose flavonoid 3-O-glucosyltransferase 3 OS=Fragaria ananassa OX=3747 GN=GT3 PE=2 SV=1	-	-	-	-	-	-
TR13718_c0_g1	32.16	4.75	2.76	up	0.00061404	0.02115	-	-	-	-	-	-	-	-
TR11982_c0_g1	0	10.17	-5.7868	down	0.0006133	0.021127	disease resistance protein At4g27190-like isoform X1 [Camellia sinensis]	-	-	-	-	-	-	-
TR81920_c0_g1	0	10.15	-5.7849	down	0.00061326	0.021127	putative calcium-transporting ATPase 13, plasma membrane-type [Camellia sinensis]	Putative calcium-transporting ATPase 13, plasma membrane-type OS=Arabidopsis thaliana OX=3702 GN=ACA13 PE=3 SV=1	Cation transporting ATPase, C-terminus	-	-	-	-	-
TR1582_c0_g2	15.22	58.21	-1.9319	down	0.00061318	0.021127	deSI-like protein At4g17486 isoform X1 [Camellia sinensis]	DeSI-like protein At4g17486 OS=Arabidopsis thaliana OX=3702 GN=At4g17486 PE=2 SV=1	PPPDE putative peptidase domain	-	-	-	-	-
TR20567_c0_g2	8.67	38.84	-2.1645	down	0.00061277	0.02112	-	-	-	-	-	-	-	-
TR1226_c2_g1	166.84	372.72	-1.1601	down	0.00061177	0.021088	zinc finger CCCH domain-containing protein 22-like [Camellia sinensis]	Zinc finger CCCH domain-containing protein 53 OS=Oryza sativa subsp. japonica OX=39947 GN=Os07g0682400 PE=2 SV=1	-	-	-	-	-	-
TR114615_c0_g1	13.61	57.55	-2.0701	down	0.00061127	0.021077	-	-	-	-	-	-	-	-
TR73725_c0_g1	10	0	5.8356	up	0.00061117	0.021077	mitotic-spindle organizing protein 1B-like isoform X2 [Camellia sinensis]|XP_028069110.1 mitotic-spindle organizing protein 1B-like isoform X2 [Camellia sinensis]|XP_028069111.1 mitotic-spindle organizing protein 1B-like isoform X2 [Camellia sinensis]|XP_028069112.1 mitotic-spindle organizing protein 1B-like isoform X2 [Camellia sinensis]|XP_028069113.1 mitotic-spindle organizing protein 1B-like …	Mitotic-spindle organizing protein 1B OS=Arabidopsis thaliana OX=3702 GN=GIP1 PE=1 SV=1	-	-	-	-	-	-
TR638_c0_g2	10.81	0	5.9465	up	0.00061095	0.021072	-	-	-	-	-	-	-	-
TR13982_c0_g1	10.16	0	5.8566	up	0.00061079	0.021069	uncharacterized protein LOC112166963 [Rosa chinensis]	-	-	-	-	-	-	-
TR24655_c1_g1	0	10.19	-5.7906	down	0.00061049	0.021062	-	-	-	-	-	-	-	-
TR4838_c3_g1	0	10.19	-5.7906	down	0.00061049	0.021062	early nodulin-55-1-like [Camellia sinensis]	-	-	-	-	-	-	-
TR15968_c0_g1	0.65	17.62	-4.7338	down	0.00060985	0.021049	-	-	-	-	-	-	-	-
TR67788_c0_g1	9.95	0	5.8281	up	0.00060976	0.021049	probable disease resistance protein At4g27220 [Camellia sinensis]|XP_028098853.1 probable disease resistance protein At4g27220 [Camellia sinensis]|XP_028098854.1 probable disease resistance protein At4g27220 [Camellia sinensis]|XP_028098855.1 probable disease resistance protein At4g27220 [Camellia sinensis]|XP_028098856.1 probable disease resistance protein At4g27220 [Camellia sinensis]|XP_028098…	-	-	-	-	-	-	-
TR11701_c2_g1	16.73	58.3	-1.8029	down	0.00060916	0.021034	acid phosphatase 1-like [Camellia sinensis]	-	-	-	-	-	-	-
TR10837_c2_g1	10.18	0	5.8626	up	0.00060916	0.021034	-	-	-	-	-	-	-	-
TR66551_c0_g1	12.32	0	6.1335	up	0.00060869	0.021023	-	-	-	-	-	-	-	-
TR161183_c0_g1	1.37	19.42	-3.8465	down	0.00060859	0.021022	-	-	-	-	-	-	-	-
TR2796_c5_g1	36.14	7.62	2.2463	up	0.00060829	0.021015	uncharacterized protein LOC114290171 isoform X2 [Camellia sinensis]	-	-	-	-	-	-	-
TR8832_c0_g1	378.16	161.42	1.229	up	0.00060734	0.020986	MADS-box transcription factor AG1 [Camellia japonica]	Floral homeotic protein AGAMOUS OS=Nicotiana tabacum OX=4097 GN=AG1 PE=2 SV=1	SRF-type transcription factor (DNA-binding and dimerisation domain)	-	-	-	-	-
TR10791_c0_g1	46.87	11.47	2.0344	up	0.00060737	0.020986	protein ENHANCED DISEASE RESISTANCE 2 isoform X2 [Camellia sinensis]	Protein ENHANCED DISEASE RESISTANCE 2-like OS=Arabidopsis thaliana OX=3702 GN=EDR2L PE=2 SV=1	START domain	-	-	-	-	-
TR13275_c0_g2	86.6	24.49	1.8217	up	0.00060478	0.020902	amino acid transporter AVT3C-like [Camellia sinensis]	Amino acid transporter AVT3C OS=Arabidopsis thaliana OX=3702 GN=AVT3C PE=1 SV=1	Transmembrane amino acid transporter protein	-	-	-	K14209|SLC36A, PAT; solute carrier family 36 (proton-coupled amino acid transporter)	ko04138(Cellular Processes);ko04974(Organismal Systems)
TR1986_c0_g2	283.51	113.06	1.3264	up	0.00060423	0.020886	BTB/POZ domain-containing protein At1g55760-like [Camellia sinensis]	BTB/POZ domain-containing protein At1g55760 OS=Arabidopsis thaliana OX=3702 GN=At1g55760 PE=2 SV=1	BTB/POZ domain	-	-	-	K10523|SPOP; speckle-type POZ protein	ko04340(Environmental Information Processing);ko04341(Environmental Information Processing)
TR107796_c0_g1	0	10.41	-5.8221	down	0.00060411	0.020885	-	-	-	-	-	-	-	-
TR320_c1_g2	459.22	219.54	1.0647	up	0.00060304	0.020851	uncharacterized protein LOC114315163 [Camellia sinensis]	-	-	-	-	-	-	-
TR8724_c0_g1	24.59	2.16	3.4903	up	0.00060262	0.020839	-	-	-	-	-	-	-	-
TR18303_c0_g1	0.94	18.64	-4.2548	down	0.00060178	0.020813	DNA double-strand break repair Rad50 ATPase [Actinidia chinensis var. chinensis]	-	-	-	-	-	-	-
TR3202_c7_g2	11.01	0	5.974	up	0.00060107	0.020794	protein NLP7-like isoform X2 [Camellia sinensis]	-	-	-	-	-	-	-
TR21990_c0_g1	15.05	0.33	5.4601	up	0.00060006	0.020762	ribonucleoside-diphosphate reductase small chain [Camellia sinensis]	Ribonucleoside-diphosphate reductase small chain OS=Nicotiana tabacum OX=4097 PE=2 SV=1	Ribonucleotide reductase, small chain	-	-	-	K10808|RRM2; ribonucleoside-diphosphate reductase subunit M2 [EC:1.17.4.1]	ko00230(Metabolism);ko00240(Metabolism);ko00480(Metabolism);ko00983(Metabolism);ko01100(Metabolism);ko04115(Cellular Processes)
TR4910_c0_g1	2.95	28.52	-3.2644	down	0.00059982	0.020756	-	-	-	-	-	-	-	-
TR75649_c0_g1	49.06	10.04	2.2967	up	0.00059979	0.020756	-	-	-	-	-	-	-	-
TR2747_c1_g1	276.87	661.99	-1.2578	down	0.00059929	0.020745	uncharacterized protein At3g27210-like isoform X1 [Camellia sinensis]	Uncharacterized protein At3g27210 OS=Arabidopsis thaliana OX=3702 GN=Y-2 PE=1 SV=1	-	-	-	-	-	-
TR127589_c0_g1	10.14	0	5.8528	up	0.00059913	0.020744	-	-	-	-	-	-	-	-
TR72883_c0_g1	18.09	0.61	4.8546	up	0.00059878	0.020735	glycosyl hydrolase 5 family protein-like [Camellia sinensis]	Glycosyl hydrolase 5 family protein OS=Chamaecyparis obtusa OX=13415 PE=1 SV=1	Cellulase (glycosyl hydrolase family 5)	-	-	-	K01179|E3.2.1.4; endoglucanase [EC:3.2.1.4]	ko00500(Metabolism);ko01100(Metabolism);ko02020(Environmental Information Processing)
TR10173_c0_g1	28.51	0.33	6.3848	up	0.00059844	0.020726	glucomannan 4-beta-mannosyltransferase 9-like [Camellia sinensis]	Glucomannan 4-beta-mannosyltransferase 9 OS=Arabidopsis thaliana OX=3702 GN=CSLA9 PE=1 SV=1	Glycosyl transferase family group 2;Glycosyltransferase like family 2;Glycosyl transferase family 2;Glycosyl transferase family 21	-	-	-	-	-
TR66254_c0_g1	0.34	14.18	-5.3061	down	0.00059733	0.020691	-	T-complex protein 1 subunit zeta 1 OS=Arabidopsis thaliana OX=3702 GN=CCT6A PE=1 SV=1	-	-	-	-	-	-
TR124140_c0_g1	0	27.04	-7.199	down	0.00059708	0.020685	hypothetical protein IQ07DRAFT_680166 [Pyrenochaeta sp. DS3sAY3a]	-	-	-	-	-	-	-
TR27069_c0_g2	2.27	23.58	-3.3562	down	0.00059642	0.020665	-	-	-	-	-	-	-	-
TR872_c0_g1	1254.14	5750.17	-2.1969	down	0.00059578	0.020645	receptor-like protein 4 isoform X1 [Camellia sinensis]	Receptor-like protein 4 OS=Arabidopsis thaliana OX=3702 GN=RLP4 PE=2 SV=1	Carbohydrate-binding protein of the ER;Di-glucose binding within endoplasmic reticulum;Leucine rich repeat;Leucine Rich repeats (2 copies);Leucine Rich Repeat;Alcohol dehydrogenase GroES-like domain;Zinc-binding dehydrogenase;Zinc-binding dehydrogenase	-	-	-	-	-
TR36611_c0_g1	10.01	0	5.8358	up	0.0005956	0.020642	-	-	-	-	-	-	-	-
TR6037_c3_g2	0	10.93	-5.8929	down	0.00059493	0.020624	-	-	-	-	-	-	-	-
TR22927_c0_g1	47.73	132.73	-1.4766	down	0.0005948	0.020624	GPI-anchored protein LLG1-like isoform X1 [Camellia sinensis]|XP_028052331.1 GPI-anchored protein LLG1-like isoform X3 [Camellia sinensis]	GPI-anchored protein LLG1 OS=Arabidopsis thaliana OX=3702 GN=LLG1 PE=1 SV=1	-	-	-	-	-	-
TR4898_c0_g3	10203.3	4501.01	1.1807	up	0.00059501	0.020624	leucoanthocyanidin reductase [Camellia nitidissima]	Leucoanthocyanidin reductase OS=Desmodium uncinatum OX=225101 GN=LAR PE=1 SV=1	NmrA-like family;NAD(P)H-binding;NAD dependent epimerase/dehydratase family	-	-	-	K13081|LAR; leucoanthocyanidin reductase [EC:1.17.1.3]	ko00941(Metabolism);ko01110(Metabolism)
TR53944_c0_g1	24.58	2.22	3.4707	up	0.00059488	0.020624	-	-	-	-	-	-	-	-
TR1506_c6_g1	581.2	252.2	1.2049	up	0.00059461	0.020622	protein ASPARTIC PROTEASE IN GUARD CELL 2 [Camellia sinensis]	Protein ASPARTIC PROTEASE IN GUARD CELL 2 OS=Arabidopsis thaliana OX=3702 GN=ASPG2 PE=2 SV=1	Xylanase inhibitor N-terminal;Xylanase inhibitor C-terminal;Eukaryotic aspartyl protease;SRF-type transcription factor (DNA-binding and dimerisation domain)	-	-	-	-	-
TR493_c0_g1	865.42	335.77	1.3654	up	0.00059359	0.020589	uncharacterized protein LOC114265386 [Camellia sinensis]	-	Ankyrin repeats (3 copies);Domain of unknown function;Ankyrin repeats (many copies);Ankyrin repeats (many copies);Ankyrin repeat;Ankyrin repeat	-	-	-	-	-
TR11837_c3_g2	2.71	27.61	-3.3589	down	0.00059287	0.020567	uncharacterized protein LOC114292991 [Camellia sinensis]	-	-	-	-	-	-	-
TR73007_c0_g1	88.76	252.4	-1.5083	down	0.00059271	0.020564	cytochrome P450 CYP72A219-like isoform X6 [Camellia sinensis]	Cytochrome P450 CYP72A219 OS=Panax ginseng OX=4054 PE=2 SV=1	-	-	-	-	-	-
TR47020_c3_g1	0.65	17.01	-4.6819	down	0.00059152	0.020526	-	-	-	-	-	-	-	-
TR7862_c3_g1	29.76	96.09	-1.6942	down	0.00059098	0.02051	CBL-interacting serine/threonine-protein kinase 5-like [Camellia sinensis]	CBL-interacting serine/threonine-protein kinase 25 OS=Arabidopsis thaliana OX=3702 GN=CIPK25 PE=2 SV=1	Protein kinase domain;NAF domain;Protein tyrosine kinase	-	-	-	-	-
TR66312_c0_g3	0	10.62	-5.8481	down	0.00059077	0.020506	LEAF RUST 10 DISEASE-RESISTANCE LOCUS RECEPTOR-LIKE PROTEIN KINASE-like 1.1 [Camellia sinensis]	-	-	-	-	-	-	-
TR94723_c0_g1	51.53	11.91	2.1178	up	0.00059077	0.020506	plasma membrane ATPase 2-like isoform X3 [Camellia sinensis]|XP_028060791.1 plasma membrane ATPase 2-like isoform X6 [Camellia sinensis]|XP_028060792.1 plasma membrane ATPase 2-like isoform X7 [Camellia sinensis]	Plasma membrane ATPase 1 OS=Nicotiana plumbaginifolia OX=4092 GN=PMA1 PE=2 SV=1	-	-	-	-	-	-
TR56503_c1_g2	0	11.1	-5.9141	down	0.00059027	0.020494	probable LRR receptor-like serine/threonine-protein kinase At3g47570 [Camellia sinensis]	Receptor kinase-like protein Xa21 OS=Oryza sativa subsp. indica OX=39946 GN=XA21 PE=1 SV=1	Leucine Rich repeats (2 copies);Leucine rich repeat;Leucine Rich Repeat;Leucine Rich repeat	-	-	-	-	-
TR15605_c0_g1	3.77	29.04	-2.9626	down	0.00058947	0.020469	calcium-binding protein 39-like isoform X5 [Camellia sinensis]	-	-	-	-	-	-	-
TR1761_c15_g1	8.2	43.31	-2.3963	down	0.00058936	0.020468	-	-	-	-	-	-	-	-
TR60596_c0_g1	10.03	0	5.8395	up	0.00058901	0.020459	uncharacterized protein LOC114313714 isoform X3 [Camellia sinensis]	-	-	-	-	-	-	-
TR286_c1_g1	938.11	458.53	1.0331	up	0.00058879	0.020454	protein RALF-like 24 [Camellia sinensis]	Protein RALF-like 24 OS=Arabidopsis thaliana OX=3702 GN=RALFL24 PE=3 SV=1	Rapid ALkalinization Factor (RALF)	-	-	-	-	-
TR26461_c1_g1	9.98	0	5.8329	up	0.00058858	0.02045	-	-	-	-	-	-	-	-
TR27709_c1_g1	10.33	0	5.8815	up	0.00058721	0.020405	-	-	-	-	-	-	-	-
TR2268_c1_g1	0	10.61	-5.8508	down	0.00058637	0.020378	-	-	-	-	-	-	-	-
TR4662_c1_g1	141.76	52.63	1.4316	up	0.00058632	0.020378	uncharacterized protein LOC114268828 [Camellia sinensis]	-	-	-	-	-	-	-
TR28909_c0_g1	0.68	17.67	-4.7189	down	0.00058603	0.020375	-	-	-	-	-	-	-	-
TR7472_c0_g1	19.76	1.56	3.6496	up	0.00058479	0.020335	-	-	-	-	-	-	-	-
TR633_c0_g2	47.83	164.46	-1.7814	down	0.00058454	0.020329	probable polyamine transporter At1g31830 isoform X1 [Camellia sinensis]	Probable polyamine transporter At1g31830 OS=Arabidopsis thaliana OX=3702 GN=At1g31830 PE=2 SV=1	Amino acid permease;Amino acid permease	-	-	-	-	-
TR3054_c4_g1	2.78	71.36	-4.6964	down	0.0005843	0.020323	Uncharacterized protein TCM_011399 [Theobroma cacao]	-	-	-	-	-	-	-
TR114847_c0_g1	10.1	0	5.8481	up	0.00058421	0.020323	-	-	-	-	-	-	-	-
TR18538_c0_g1	10.1	0	5.8481	up	0.00058421	0.020323	-	-	-	-	-	-	-	-
TR15553_c1_g1	7	36.11	-2.3683	down	0.00058382	0.020317	aminopeptidase M1-like [Camellia sinensis]	Aminopeptidase M1 OS=Arabidopsis thaliana OX=3702 GN=APM1 PE=1 SV=1	-	-	-	-	-	-
TR13175_c0_g1	7.95	37.65	-2.2397	down	0.00058384	0.020317	-	-	-	-	-	-	-	-
TR10202_c0_g1	138.73	55.5	1.3211	up	0.00058387	0.020317	carboxylesterase SOBER1-like isoform X1 [Camellia sinensis]	Probable carboxylesterase SOBER1-like OS=Arabidopsis thaliana OX=3702 GN=At4g22300 PE=2 SV=1	Phospholipase/Carboxylesterase;Dienelactone hydrolase family;Serine aminopeptidase, S33;Prolyl oligopeptidase family	-	-	-	-	-
TR25170_c0_g2	17.41	0.66	4.7603	up	0.00058367	0.020317	uncharacterized protein LOC114308827 isoform X7 [Camellia sinensis]	-	-	-	-	-	-	-
TR1817_c1_g1	12325	2733.32	2.1729	up	0.00058325	0.020307	non-functional NADPH-dependent codeinone reductase 2-like isoform X1 [Camellia sinensis]	Non-functional NADPH-dependent codeinone reductase 2 OS=Papaver somniferum OX=3469 GN=COR2 PE=1 SV=1	Aldo/keto reductase family	-	-	-	-	-
TR428_c12_g1	0.34	14.41	-5.3278	down	0.0005828	0.020294	-	-	-	-	-	-	-	-
TR510_c1_g1	38.68	8.24	2.2298	up	0.00058259	0.020289	Peptidyl-prolyl cis-trans isomerase NIMA-interacting 4 like [Actinidia chinensis var. chinensis]	-	-	-	-	-	-	-
TR48057_c3_g2	3.42	56.85	-4.0637	down	0.00058241	0.020286	-	-	-	-	-	-	-	-
TR12288_c0_g1	30.89	5.34	2.5252	up	0.00058222	0.020282	3-hydroxyisobutyryl-CoA hydrolase 1-like isoform X2 [Herrania umbratica]	3-hydroxyisobutyryl-CoA hydrolase 1 OS=Arabidopsis thaliana OX=3702 GN=CHY1 PE=1 SV=1	-	-	-	-	K05605|HIBCH; 3-hydroxyisobutyryl-CoA hydrolase [EC:3.1.2.4]	ko00280(Metabolism);ko00410(Metabolism);ko00640(Metabolism);ko01100(Metabolism);ko01200(Metabolism)
TR667_c1_g2	6.09	33.47	-2.4668	down	0.00058136	0.020255	protein RICE SALT SENSITIVE 3-like isoform X2 [Camellia sinensis]	-	-	-	-	-	-	-
TR54941_c0_g1	1	18.28	-4.1937	down	0.00058067	0.020234	L10-interacting MYB domain-containing protein-like isoform X1 [Camellia sinensis]	-	-	-	-	-	-	-
TR3832_c4_g1	8.36	44.88	-2.4085	down	0.00058042	0.020228	-	-	-	-	-	-	-	-
TR45805_c0_g1	0.62	17.96	-4.7795	down	0.00057917	0.02019	LEAF RUST 10 DISEASE-RESISTANCE LOCUS RECEPTOR-LIKE PROTEIN KINASE-like 1.2 isoform X2 [Camellia sinensis]	LEAF RUST 10 DISEASE-RESISTANCE LOCUS RECEPTOR-LIKE PROTEIN KINASE-like 2.4 OS=Arabidopsis thaliana OX=3702 GN=LRK10L-2.4 PE=3 SV=1	Wall-associated receptor kinase C-terminal;Wall-associated receptor kinase galacturonan-binding	-	-	-	-	-
TR7315_c0_g1	249.43	109.89	1.1836	up	0.000579	0.020187	GTP-binding protein BRASSINAZOLE INSENSITIVE PALE GREEN 2, chloroplastic [Camellia sinensis]	GTP-binding protein BRASSINAZOLE INSENSITIVE PALE GREEN 2, chloroplastic OS=Arabidopsis thaliana OX=3702 GN=BPG2 PE=1 SV=1	50S ribosome-binding GTPase	-	-	-	-	-
TR54089_c0_g1	14.76	58.28	-1.9752	down	0.00057881	0.020183	uncharacterized protein LOC114310464 [Camellia sinensis]	-	-	-	-	-	-	-
TR8479_c0_g1	111.15	247.42	-1.1535	down	0.00057864	0.02018	choline transporter protein 1-like isoform X1 [Camellia sinensis]	Choline transporter protein 1 OS=Arabidopsis thaliana OX=3702 GN=CHER1 PE=1 SV=1	Plasma-membrane choline transporter	-	-	-	-	-
TR119992_c0_g1	10.08	0	5.8453	up	0.00057863	0.02018	uncharacterized protein LOC114267091 isoform X2 [Camellia sinensis]	-	-	-	-	-	-	-
TR188201_c0_g1	2.57	25.83	-3.3059	down	0.0005778	0.020156	-	-	-	-	-	-	-	-
TR13526_c0_g1	17.46	0.94	4.2036	up	0.00057744	0.020146	-	-	-	-	-	-	-	-
TR21250_c0_g1	10.06	0	5.8433	up	0.00057736	0.020146	Protein CROWDED NUCLEI like [Actinidia chinensis var. chinensis]	Protein CROWDED NUCLEI 3 OS=Arabidopsis thaliana OX=3702 GN=CRWN3 PE=1 SV=1	-	-	-	-	-	-
TR67960_c0_g1	10.06	0	5.8433	up	0.00057736	0.020146	-	-	-	-	-	-	-	-
TR69912_c0_g2	0.35	16.63	-5.5329	down	0.00057675	0.020131	hypothetical protein SNOG_09286 [Parastagonospora nodorum SN15]|EAT83478.2 hypothetical protein SNOG_09286 [Parastagonospora nodorum SN15]	60S ribosomal protein L39-1 OS=Oryza sativa subsp. japonica OX=39947 GN=RPL39A PE=3 SV=2	-	metabolic process;peptide metabolic process;nitrogen compound metabolic process;biological_process;biosynthetic process;macromolecule biosynthetic process;cellular process;gene expression;protein metabolic process;cellular nitrogen compound metabolic process;cellular macromolecule biosynthetic process;peptide biosynthetic process;macromolecule metabolic process;cellular amide metabolic process;am…	molecular_function;structural molecule activity;structural constituent of ribosome	intracellular;cellular_component;ribonucleoprotein complex;cell;cytoplasm;protein-containing complex;organelle;non-membrane-bounded organelle;intracellular organelle;intracellular non-membrane-bounded organelle;intracellular part;cytoplasmic part;cell part;ribosome	K02924|RP-L39e, RPL39; large subunit ribosomal protein L39e	ko03010(Genetic Information Processing)
TR13945_c0_g1	89.83	30.16	1.5756	up	0.00057623	0.020118	adenine phosphoribosyltransferase 5-like [Camellia sinensis]	Adenine phosphoribosyltransferase 5 OS=Arabidopsis thaliana OX=3702 GN=APT5 PE=1 SV=1	Phosphoribosyl transferase domain	-	-	-	K00759|APRT, apt; adenine phosphoribosyltransferase [EC:2.4.2.7]	ko00230(Metabolism);ko01100(Metabolism)
TR471_c21_g1	0	10.44	-5.8255	down	0.00057575	0.020106	-	-	-	-	-	-	-	-
TR4897_c1_g1	455.63	1117.6	-1.2944	down	0.00057581	0.020106	extra-large guanine nucleotide-binding protein 1-like isoform X1 [Camellia sinensis]|XP_028102069.1 extra-large guanine nucleotide-binding protein 1-like isoform X1 [Camellia sinensis]|XP_028102071.1 extra-large guanine nucleotide-binding protein 1-like isoform X1 [Camellia sinensis]	Extra-large guanine nucleotide-binding protein 1 OS=Arabidopsis thaliana OX=3702 GN=XLG1 PE=1 SV=2	G-protein alpha subunit	-	-	-	-	-
TR92809_c0_g1	34.48	100.52	-1.5424	down	0.00057464	0.020071	disease resistance protein At4g27190-like [Camellia sinensis]	Disease resistance protein At4g27190 OS=Arabidopsis thaliana OX=3702 GN=At4g27190 PE=2 SV=1	NB-ARC domain	-	-	-	-	-
TR162429_c0_g3	0	11.41	-5.9514	down	0.00057404	0.020054	-	-	-	-	-	-	-	-
TR24_c5_g1	232.59	102.03	1.1882	up	0.00057407	0.020054	DNA repair endonuclease [Actinidia chinensis var. chinensis]	DNA repair endonuclease UVH1 OS=Arabidopsis thaliana OX=3702 GN=UVH1 PE=1 SV=2	ERCC4 domain	-	-	-	K10848|ERCC4, XPF; DNA excision repair protein ERCC-4 [EC:3.1.-.-]	ko03420(Genetic Information Processing);ko03460(Genetic Information Processing)
TR26714_c0_g1	10.56	0	5.9116	up	0.00057396	0.020054	bidirectional sugar transport SWEET 17 [Camellia sinensis]	Bidirectional sugar transporter SWEET16 OS=Oryza sativa subsp. japonica OX=39947 GN=SWEET16 PE=3 SV=1	Sugar efflux transporter for intercellular exchange	-	-	-	-	-
TR101002_c1_g1	10.09	0	5.8462	up	0.00057378	0.020052	-	-	-	-	-	-	-	-
TR20235_c0_g1	10.09	0	5.8462	up	0.00057378	0.020052	GPCR-type G protein 1-like isoform X6 [Camellia sinensis]|XP_028083182.1 GPCR-type G protein 1-like isoform X6 [Camellia sinensis]	GPCR-type G protein 1 OS=Arabidopsis thaliana OX=3702 GN=GTG1 PE=1 SV=1	-	-	-	-	-	-
TR21258_c0_g1	1.35	18.44	-3.7825	down	0.00057267	0.020019	uncharacterized protein LOC114273529 isoform X1 [Camellia sinensis]	-	Zinc knuckle	-	-	-	-	-
TR5988_c0_g3	0	10.56	-5.8404	down	0.00057213	0.020006	-	-	-	-	-	-	-	-
TR6390_c0_g1	161.15	61.69	1.3844	up	0.00057223	0.020006	uncharacterized protein LOC114279412 [Camellia sinensis]	-	-	-	-	-	-	-
TR33504_c0_g2	11.26	0	6.0101	up	0.00057203	0.020005	-	-	-	-	-	-	-	-
TR41122_c0_g1	1.02	19.61	-4.2789	down	0.00057087	0.019967	DNA-directed RNA polymerase II subunit 1 isoform X2 [Camellia sinensis]	DNA-directed RNA polymerase II subunit 1 OS=Arabidopsis thaliana OX=3702 GN=NRPB1 PE=1 SV=3	RNA polymerase Rpb1, domain 5	-	-	-	K03006|RPB1, POLR2A; DNA-directed RNA polymerase II subunit RPB1 [EC:2.7.7.6]	ko03020(Genetic Information Processing)
TR15512_c0_g1	329.21	150.31	1.1311	up	0.0005705	0.019957	uncharacterized protein LOC114293480 [Camellia sinensis]	-	-	-	-	-	-	-
TR2281_c0_g1	1247.5	620.18	1.0085	up	0.00056958	0.01993	uncharacterized protein LOC114269292 isoform X1 [Camellia sinensis]|XP_028066379.1 uncharacterized protein LOC114269292 isoform X1 [Camellia sinensis]|XP_028066380.1 uncharacterized protein LOC114269292 isoform X1 [Camellia sinensis]|XP_028066381.1 uncharacterized protein LOC114269292 isoform X1 [Camellia sinensis]	-	-	-	-	-	-	-
TR55187_c0_g2	21.54	1.6	3.7584	up	0.00056964	0.01993	Gypsy retrotransposon integrase-like protein 1 [Vitis vinifera]	-	Reverse transcriptase-like	-	-	-	-	-
TR25750_c0_g1	132.16	48.09	1.4604	up	0.00056932	0.019927	casein kinase 1-like protein HD16 [Camellia sinensis]	Casein kinase 1-like protein HD16 OS=Oryza sativa subsp. japonica OX=39947 GN=HD16 PE=1 SV=1	-	-	-	-	-	-
TR50800_c1_g2	0	10.53	-5.837	down	0.00056918	0.019925	-	-	-	-	-	-	-	-
TR10636_c0_g2	0	10.38	-5.8182	down	0.00056852	0.019904	-	-	-	-	-	-	-	-
TR44322_c0_g1	5.35	30.68	-2.5218	down	0.00056801	0.019889	-	-	-	-	-	-	-	-
TR18369_c0_g1	7.54	43.35	-2.5169	down	0.00056777	0.019884	-	-	-	-	-	-	-	-
TR964_c5_g1	21.88	1.52	3.8176	up	0.00056776	0.019884	-	-	-	-	-	-	-	-
TR1025_c0_g1	1.39	19.75	-3.865	down	0.00056732	0.019875	subtilisin-like protease SBT3.6 isoform X3 [Camellia sinensis]	Subtilisin-like protease SBT3.8 OS=Arabidopsis thaliana OX=3702 GN=SBT3.8 PE=3 SV=1	Subtilase family;Subtilase family	-	-	-	-	-
TR2075_c1_g1	608.63	92.18	2.7236	up	0.00056736	0.019875	beta-galactosidase 8-like [Camellia sinensis]	Beta-galactosidase 6 OS=Oryza sativa subsp. japonica OX=39947 GN=Os03g0255100 PE=1 SV=2	Glycosyl hydrolases family 35;Beta-galactosidase	-	-	-	-	-
TR20816_c0_g1	1.67	20.77	-3.6401	down	0.00056702	0.019869	probable leucine-rich repeat receptor-like protein kinase At1g35710 [Camellia sinensis]	Probable leucine-rich repeat receptor-like protein kinase At1g35710 OS=Arabidopsis thaliana OX=3702 GN=At1g35710 PE=2 SV=1	Leucine rich repeat N-terminal domain	-	-	-	-	-
TR45259_c0_g1	21.24	2.19	3.2666	up	0.00056699	0.019869	telomere repeat-binding protein 5-like [Camellia sinensis]	Telomere repeat-binding protein 5 OS=Arabidopsis thaliana OX=3702 GN=TRP5 PE=1 SV=2	-	-	-	-	-	-
TR15929_c0_g2	0	11.16	-5.9238	down	0.0005652	0.019811	-	-	-	-	-	-	-	-
TR3910_c0_g1	759.7	1996.97	-1.3944	down	0.00056475	0.019797	probable inactive receptor kinase At5g58300 [Camellia sinensis]	Probable inactive receptor kinase At5g58300 OS=Arabidopsis thaliana OX=3702 GN=At5g58300 PE=2 SV=1	Protein kinase domain;Protein tyrosine kinase;Leucine rich repeat;Leucine Rich repeats (2 copies);Leucine rich repeat N-terminal domain;Leucine Rich Repeat;Aluminium induced protein;Glutamine amidotransferase domain;Glutamine amidotransferase domain	-	-	-	-	-
TR2562_c0_g1	387.92	183.95	1.0767	up	0.00056438	0.019787	RRP12-like protein isoform X1 [Camellia sinensis]	-	NUC173 domain	-	-	-	-	-
TR20267_c0_g1	1959.53	958.3	1.032	up	0.00056419	0.019783	NADH dehydrogenase [ubiquinone] iron-sulfur protein 1, mitochondrial [Camellia sinensis]|XP_028112003.1 NADH dehydrogenase [ubiquinone] iron-sulfur protein 1, mitochondrial [Camellia sinensis]|XP_028112004.1 NADH dehydrogenase [ubiquinone] iron-sulfur protein 1, mitochondrial [Camellia sinensis]	NADH dehydrogenase [ubiquinone] iron-sulfur protein 1, mitochondrial OS=Solanum tuberosum OX=4113 PE=2 SV=1	Molybdopterin oxidoreductase;2Fe-2S iron-sulfur cluster binding domain;NADH-ubiquinone oxidoreductase-G iron-sulfur binding region;NADH-ubiquinone oxidoreductase subunit G, C-terminal;2Fe-2S iron-sulfur cluster binding domain	-	-	-	K03934|NDUFS1; NADH dehydrogenase (ubiquinone) Fe-S protein 1 [EC:7.1.1.2]	ko00190(Metabolism);ko01100(Metabolism);ko04714(Organismal Systems);ko04723(Organismal Systems)
TR50308_c0_g2	0.34	14.83	-5.3686	down	0.0005638	0.019772	LOW QUALITY PROTEIN: MDIS1-interacting receptor like kinase 1-like [Camellia sinensis]	MDIS1-interacting receptor like kinase 1 OS=Arabidopsis thaliana OX=3702 GN=MIK1 PE=1 SV=1	Protein kinase domain;Protein tyrosine kinase;Leucine rich repeat;Leucine Rich repeats (2 copies)	-	-	-	-	-
TR10168_c0_g1	22.28	1.94	3.5393	up	0.00056369	0.019771	cysteine-rich receptor-like protein kinase 10 [Camellia sinensis]	Cysteine-rich repeat secretory protein 38 OS=Arabidopsis thaliana OX=3702 GN=CRRSP38 PE=2 SV=1	Salt stress response/antifungal	-	-	-	-	-
TR3_c0_g2	862.52	408.43	1.0782	up	0.00056279	0.019743	RING-H2 finger protein ATL46-like [Camellia sinensis]	RING-H2 finger protein ATL46 OS=Arabidopsis thaliana OX=3702 GN=ATL46 PE=2 SV=1	PPR repeat family;PPR repeat;PPR repeat;Pentatricopeptide repeat domain;Pentacotripeptide-repeat region of PRORP;Ring finger domain;RING-H2 zinc finger domain;RING-like zinc finger;Anaphase-promoting complex subunit 11 RING-H2 finger;Zinc finger, C3HC4 type (RING finger)	-	-	-	-	-
TR36137_c0_g1	547.71	271.83	1.0104	up	0.0005626	0.019739	probable histone H2A variant 3 isoform X1 [Camellia sinensis]|XP_028091575.1 probable histone H2A variant 3 isoform X2 [Camellia sinensis]	Probable histone H2A variant 3 OS=Arabidopsis thaliana OX=3702 GN=At1g52740 PE=1 SV=1	-	-	-	-	K11251|H2A; histone H2A	ko04217(Cellular Processes)
TR26342_c0_g1	0.94	21.07	-4.4366	down	0.0005621	0.019727	-	-	-	-	-	-	-	-
TR11593_c1_g1	1.71	68.81	-5.3427	down	0.00056193	0.019723	-	-	-	-	-	-	-	-
TR15060_c0_g1	0	11.16	-5.924	down	0.00056174	0.019719	probable glutathione S-transferase [Camellia sinensis]	Probable glutathione S-transferase OS=Glycine max OX=3847 GN=HSP26-A PE=2 SV=1	-	-	-	-	-	-
TR168663_c0_g1	0.35	14.38	-5.325	down	0.0005615	0.019714	-	-	-	-	-	-	-	-
TR59572_c0_g1	0	10.38	-5.8183	down	0.00056099	0.019699	-	-	-	-	-	-	-	-
TR31242_c0_g1	0	10.77	-5.8705	down	0.00056016	0.019672	G-type lectin S-receptor-like serine/threonine-protein kinase At2g19130 [Camellia sinensis]	G-type lectin S-receptor-like serine/threonine-protein kinase At2g19130 OS=Arabidopsis thaliana OX=3702 GN=At2g19130 PE=2 SV=1	D-mannose binding lectin	-	-	-	-	-
TR28195_c0_g3	0.34	15.56	-5.437	down	0.00055975	0.019661	uncharacterized protein LOC114304299, partial [Camellia sinensis]	General transcription and DNA repair factor IIH helicase subunit XPD OS=Arabidopsis thaliana OX=3702 GN=XPD PE=1 SV=1	Domain of unknown function (DUF4283);Zinc knuckle	-	-	-	-	-
TR30950_c0_g2	18.17	85.28	-2.225	down	0.00055955	0.019656	uncharacterized protein LOC114276210 [Camellia sinensis]	-	Leucine Rich repeats (2 copies)	-	-	-	-	-
TR1155_c1_g1	20.26	65.47	-1.6911	down	0.000559	0.019642	pre-mRNA-processing factor 19 homolog 1-like [Camellia sinensis]	Pre-mRNA-processing factor 19 homolog 2 OS=Arabidopsis thaliana OX=3702 GN=PRP19B PE=1 SV=3	-	-	-	-	-	-
TR21180_c0_g2	10.22	0	5.8673	up	0.00055834	0.019622	PREDICTED: 26S proteasome non-ATPase regulatory subunit 8 homolog A [Eucalyptus grandis]|KCW72444.1 hypothetical protein EUGRSUZ_E00889 [Eucalyptus grandis]	-	-	-	-	-	-	-
TR30522_c0_g1	26.79	80.46	-1.5884	down	0.00055801	0.019613	UDP-glycosyltransferase 73C3-like isoform X1 [Camellia sinensis]	UDP-glycosyltransferase 73C2 OS=Arabidopsis thaliana OX=3702 GN=UGT73C2 PE=3 SV=1	-	-	-	-	-	-
TR81915_c0_g1	19.72	266.69	-3.7576	down	0.00055748	0.019597	-	-	-	-	-	-	-	-
TR10064_c1_g1	1.87	25.08	-3.6982	down	0.00055661	0.019572	calcium-binding protein KRP1-like [Camellia sinensis]	Calcium-binding protein KRP1 OS=Arabidopsis thaliana OX=3702 GN=KRP1 PE=2 SV=1	EF-hand domain pair;EF hand	-	-	-	-	-
TR4139_c0_g2	508.63	249.3	1.0287	up	0.00055594	0.019551	ran-binding protein M homolog [Camellia sinensis]	Ran-binding protein M homolog OS=Arabidopsis thaliana OX=3702 GN=RANBPM PE=1 SV=1	SPRY domain	-	-	-	-	-
TR18940_c0_g2	10.76	0	5.9434	up	0.00055484	0.019515	LINE-1 reverse transcriptase-like [Vitis vinifera]	-	Endonuclease/Exonuclease/phosphatase family	-	-	-	-	-
TR3156_c1_g1	515.51	252.5	1.0297	up	0.00055469	0.019513	uncharacterized protein LOC114317502 [Camellia sinensis]	30S ribosomal protein S17, chloroplastic OS=Arabidopsis thaliana OX=3702 GN=RPS17 PE=1 SV=1	Ribosomal protein S17	-	-	-	K02961|RP-S17, MRPS17, rpsQ; small subunit ribosomal protein S17	ko03010(Genetic Information Processing)
TR89633_c0_g1	22.8	1.66	3.8133	up	0.00055444	0.019507	uncharacterized protein LOC114273713 isoform X2 [Camellia sinensis]	-	-	-	-	-	-	-
TR57012_c1_g1	14.7	60.62	-2.0369	down	0.00055387	0.01949	-	-	-	-	-	-	-	-
TR207702_c0_g1	10.83	0	5.9485	up	0.00055363	0.019484	-	-	-	-	-	-	-	-
TR6125_c1_g1	47.31	9.05	2.3774	up	0.00055302	0.019465	-	-	-	-	-	-	-	-
TR15509_c1_g1	0	10.5	-5.833	down	0.00055269	0.019456	uncharacterized protein LOC114302102 isoform X3 [Camellia sinensis]	-	-	-	-	-	-	-
TR310_c1_g1	1482.75	145.04	3.354	up	0.00055255	0.019454	senescence-specific cysteine protease SAG12-like [Camellia sinensis]	Senescence-specific cysteine protease SAG12 OS=Arabidopsis thaliana OX=3702 GN=SAG12 PE=1 SV=1	Papain family cysteine protease	-	-	-	-	-
TR48293_c0_g1	10.21	0	5.8662	up	0.0005524	0.019451	putative LRR receptor-like serine/threonine-protein kinase [Dorcoceras hygrometricum]	Retrovirus-related Pol polyprotein from transposon TNT 1-94 OS=Nicotiana tabacum OX=4097 PE=2 SV=1	-	-	-	-	-	-
TR205090_c0_g1	10.43	0	5.8945	up	0.00055164	0.019427	3-epi-6-deoxocathasterone 23-monooxygenase CYP90D1-like [Camellia sinensis]	3-epi-6-deoxocathasterone 23-monooxygenase OS=Arabidopsis thaliana OX=3702 GN=CYP90D1 PE=2 SV=1	-	-	-	-	-	-
TR16476_c1_g1	0.31	14.77	-5.3631	down	0.00055102	0.019411	-	-	-	-	-	-	-	-
TR50597_c0_g1	10.46	0	5.8991	up	0.00055109	0.019411	-	-	-	-	-	-	-	-
TR17552_c0_g1	50.6	12.59	2.003	up	0.00055087	0.019409	F-box protein At5g07610-like [Camellia sinensis]	-	-	-	-	-	-	-
TR363_c3_g1	95.58	32.19	1.5727	up	0.0005507	0.019405	uncharacterized protein LOC114310783 [Camellia sinensis]	-	-	-	-	-	-	-
TR33566_c0_g1	0	11.15	-5.9199	down	0.00055052	0.019402	-	-	-	-	-	-	-	-
TR39512_c0_g1	18.52	0.94	4.2887	up	0.00055049	0.019402	-	-	-	-	-	-	-	-
TR2899_c0_g1	69.97	17.61	1.9897	up	0.00054994	0.019387	probable LRR receptor-like serine/threonine-protein kinase At3g47570 [Camellia sinensis]	Putative receptor-like protein kinase At3g47110 OS=Arabidopsis thaliana OX=3702 GN=At3g47110 PE=3 SV=1	Leucine rich repeat;Leucine Rich repeats (2 copies);Leucine rich repeat;Leucine Rich Repeat	-	-	-	-	-
TR38458_c0_g1	0	10.62	-5.848	down	0.00054923	0.01937	transcription elongation factor SPT6 homolog [Camellia sinensis]	Transcription elongation factor SPT6 homolog OS=Arabidopsis thaliana OX=3702 GN=SPT6 PE=1 SV=1	-	-	-	-	-	-
TR12863_c0_g1	80.52	237.46	-1.5602	down	0.0005493	0.01937	probable leucine-rich repeat receptor-like serine/threonine-protein kinase At3g14840 isoform X4 [Camellia sinensis]	Probable LRR receptor-like serine/threonine-protein kinase At1g07650 OS=Arabidopsis thaliana OX=3702 GN=At1g07650 PE=1 SV=1	Di-glucose binding within endoplasmic reticulum	-	-	-	-	-
TR48839_c0_g1	10.54	0	5.9124	up	0.0005494	0.01937	probable LRR receptor-like serine/threonine-protein kinase At3g47570 [Camellia sinensis]	-	Leucine rich repeat;Leucine Rich repeats (2 copies)	-	-	-	-	-
TR116389_c0_g1	0	11.18	-5.9235	down	0.00054891	0.019364	-	-	-	-	-	-	-	-
TR3680_c0_g1	174.27	75.85	1.2004	up	0.00054878	0.019362	uncharacterized protein LOC114319960 isoform X2 [Camellia sinensis]	-	Protein of unknown function (DUF3531)	-	-	-	-	-
TR159997_c0_g1	10.2	0	5.8653	up	0.00054815	0.019343	high mobility group AT-hook 1, isoform CRA_a, partial [Homo sapiens]	-	-	biological_process;response to external stimulus;response to biotic stimulus;response to other organism;response to external biotic stimulus;response to stimulus;multi-organism process;DNA replication;chromosome organization;metabolic process;nucleobase-containing compound metabolic process;DNA metabolic process;DNA-dependent DNA replication;cellular aromatic compound metabolic process;nitrogen c…	DNA-binding transcription factor activity, RNA polymerase II-specific;transcription regulator activity;DNA-binding transcription activator activity, RNA polymerase II-specific;molecular_function;DNA-binding transcription factor activity;transcription factor activity, RNA polymerase II distal enhancer sequence-specific binding;nucleic acid binding;DNA binding;double-stranded DNA binding;binding;se…	intracellular;cellular_component;chromatin;heterochromatin;membrane;cell;nucleus;cytoplasm;transcription factor complex;chromosome;intracellular membrane-bounded organelle;adherens junction;cell-substrate adherens junction;cell junction;cell-substrate junction;intrinsic component of membrane;membrane-enclosed lumen;nuclear lumen;protein-containing complex;organelle;membrane-bounded organelle;non-…	-	-
TR41305_c0_g1	19.35	0.91	4.3683	up	0.00054782	0.019334	hypothetical protein AC578_3950 [Pseudocercospora eumusae]	60S ribosomal protein L26-2 OS=Arabidopsis thaliana OX=3702 GN=RPL26B PE=2 SV=1	Ribosomal proteins L26 eukaryotic, L24P archaeal;KOW motif	-	-	-	K02898|RP-L26e, RPL26; large subunit ribosomal protein L26e	ko03010(Genetic Information Processing)
TR21286_c0_g1	20.66	72.36	-1.8142	down	0.00054772	0.019333	COBRA-like protein 4 [Camellia sinensis]	COBRA-like protein 4 OS=Arabidopsis thaliana OX=3702 GN=COBL4 PE=2 SV=2	-	-	-	-	-	-
TR5342_c0_g1	326.05	150.86	1.1126	up	0.00054767	0.019333	30S ribosomal protein [Actinidia chinensis var. chinensis]	30S ribosomal protein S9, chloroplastic OS=Spinacia oleracea OX=3562 GN=PRPS9 PE=1 SV=2	Ribosomal protein S9/S16	-	-	-	K02996|RP-S9, MRPS9, rpsI; small subunit ribosomal protein S9	ko03010(Genetic Information Processing)
TR4537_c0_g2	149.28	47.34	1.6567	up	0.00054756	0.019333	Amidase [Actinidia chinensis var. chinensis]	Probable amidase At4g34880 OS=Arabidopsis thaliana OX=3702 GN=At4g34880 PE=2 SV=1	Amidase	-	-	-	K01426|E3.5.1.4, amiE; amidase [EC:3.5.1.4]	ko00330(Metabolism);ko00360(Metabolism);ko00380(Metabolism);ko00627(Metabolism);ko00643(Metabolism);ko01100(Metabolism);ko01120(Metabolism)
TR674_c6_g1	61.4	172.87	-1.4955	down	0.00054693	0.019316	ethylene-responsive transcription factor ERF014-like [Camellia sinensis]	Ethylene-responsive transcription factor ERF014 OS=Arabidopsis thaliana OX=3702 GN=ERF014 PE=2 SV=1	AP2 domain	-	-	-	-	-
TR13149_c0_g1	1181.84	2576.85	-1.1245	down	0.00054701	0.019316	probable ubiquitin-conjugating enzyme E2 24 [Camellia sinensis]|XP_028082744.1 probable ubiquitin-conjugating enzyme E2 24 [Camellia sinensis]	Probable ubiquitin-conjugating enzyme E2 24 OS=Arabidopsis thaliana OX=3702 GN=UBC24 PE=1 SV=1	Ubiquitin-conjugating enzyme;Ubiquitin-conjugating enzyme	-	-	-	K10581|UBE2O; ubiquitin-conjugating enzyme E2 O [EC:2.3.2.24]	ko04120(Genetic Information Processing)
TR35325_c0_g1	16.13	64.59	-2.0045	down	0.00054684	0.019315	uncharacterized protein PAM68-like [Camellia sinensis]	Uncharacterized protein PAM68-like OS=Arabidopsis thaliana OX=3702 GN=At5g52780 PE=2 SV=1	Protein of unknown function (DUF3464)	-	-	-	-	-
TR5223_c0_g1	19.36	0.97	4.3391	up	0.00054672	0.019314	Cyclic nucleotide-gated ion channel like [Actinidia chinensis var. chinensis]	Cyclic nucleotide-gated ion channel 2 OS=Arabidopsis thaliana OX=3702 GN=CNGC2 PE=1 SV=1	Ion transport protein;Cyclic nucleotide-binding domain	-	-	-	-	-
TR21577_c0_g3	14.53	0.33	5.4131	up	0.00054642	0.019306	uncharacterized protein LOC114267305 isoform X2 [Camellia sinensis]	-	-	-	-	-	-	-
TR33573_c1_g1	0	10.45	-5.8274	down	0.0005462	0.019301	-	-	-	-	-	-	-	-
TR3123_c0_g1	11.24	51.03	-2.18	down	0.00054509	0.019265	uncharacterized protein LOC114291243 isoform X2 [Camellia sinensis]	-	-	-	-	-	-	-
TR5936_c0_g1	225.81	93.43	1.2725	up	0.00054481	0.019257	F-box protein SKIP16 isoform X2 [Hevea brasiliensis]	-	-	-	-	-	-	-
TR24615_c0_g1	0	10.95	-5.8922	down	0.00054433	0.019243	-	-	-	-	-	-	-	-
TR11159_c6_g1	11.49	0	6.0402	up	0.0005439	0.019231	-	-	-	-	-	-	-	-
TR4386_c0_g1	17.09	80.39	-2.2366	down	0.00054304	0.019203	-	-	-	-	-	-	-	-
TR1141_c5_g1	3.86	30.37	-2.955	down	0.00054279	0.019197	-	-	-	-	-	-	-	-
TR50469_c0_g1	133.33	289.11	-1.1162	down	0.00054269	0.019196	DNA-binding protein HEXBP-like [Camellia sinensis]	DNA topoisomerase 3-alpha OS=Arabidopsis thaliana OX=3702 GN=TOP3A PE=1 SV=1	GRF zinc finger;Zinc knuckle;GAG-polyprotein viral zinc-finger;Zinc knuckle	-	-	-	-	-
TR21866_c0_g1	16.84	0.62	4.7373	up	0.00054251	0.019192	7-deoxyloganetin glucosyltransferase-like [Camellia sinensis]	-	-	-	-	-	-	-
TR2518_c2_g1	33.12	5.05	2.7086	up	0.00054236	0.01919	transcription factor TCP11-like [Camellia sinensis]	Transcription factor TCP11 OS=Arabidopsis thaliana OX=3702 GN=TCP11 PE=1 SV=1	TCP family transcription factor	-	-	-	-	-
TR4330_c4_g1	10.82	0	5.951	up	0.00054213	0.019184	APETALA2-like protein 3 isoform X1 [Camellia sinensis]|XP_028097116.1 APETALA2-like protein 3 isoform X1 [Camellia sinensis]	-	-	-	-	-	-	-
TR4759_c1_g4	0.66	18.09	-4.7682	down	0.00054098	0.019146	-	-	-	-	-	-	-	-
TR44646_c0_g1	183.72	77.89	1.2376	up	0.00054064	0.01914	pentatricopeptide repeat-containing protein At3g13160, mitochondrial-like [Camellia sinensis]	Pentatricopeptide repeat-containing protein At3g13160, mitochondrial OS=Arabidopsis thaliana OX=3702 GN=At3g13160 PE=1 SV=1	PPR repeat family;PPR repeat;PPR repeat;Pentatricopeptide repeat domain;Pentacotripeptide-repeat region of PRORP	-	-	-	-	-
TR11813_c0_g1	139.67	55.59	1.3291	up	0.00054071	0.01914	pentatricopeptide repeat-containing protein At2g41720 isoform X1 [Camellia sinensis]	Pentatricopeptide repeat-containing protein At2g41720 OS=Arabidopsis thaliana OX=3702 GN=EMB2654 PE=2 SV=1	PPR repeat family;PPR repeat;Pentatricopeptide repeat domain;PPR repeat;Pentacotripeptide-repeat region of PRORP;Tetratricopeptide repeat;Anaphase-promoting complex, cyclosome, subunit 3;Tetratricopeptide repeat;Region in Clathrin and VPS	-	-	-	-	-
TR63287_c0_g1	21.63	1.94	3.4927	up	0.0005401	0.019123	GATA transcription factor 21-like [Camellia sinensis]	GATA transcription factor 21 OS=Arabidopsis thaliana OX=3702 GN=GATA21 PE=1 SV=2	GATA zinc finger	-	-	-	-	-
TR2303_c0_g1	1859.65	893.54	1.0574	up	0.00053924	0.019095	ras-related protein RHN1-like isoform X1 [Camellia sinensis]	Ras-related protein RHN1 OS=Nicotiana plumbaginifolia OX=4092 GN=RHN1 PE=2 SV=1	Ras family;Ras of Complex, Roc, domain of DAPkinase;ADP-ribosylation factor family	-	-	-	K07888|RAB5B; Ras-related protein Rab-5B	ko04014(Environmental Information Processing);ko04144(Cellular Processes);ko04145(Cellular Processes);ko04962(Organismal Systems)
TR13843_c3_g1	0	11.62	-5.9814	down	0.00053906	0.019092	-	-	-	-	-	-	-	-
TR145764_c0_g1	0	10.98	-5.8959	down	0.00053849	0.019074	uncharacterized protein LOC114319121 [Camellia sinensis]	-	gag-polypeptide of LTR copia-type	-	-	-	-	-
TR7251_c0_g1	0	10.98	-5.8959	down	0.00053849	0.019074	-	-	-	-	-	-	-	-
TR19636_c0_g1	0	10.44	-5.8258	down	0.00053846	0.019074	-	-	-	-	-	-	-	-
TR24270_c0_g3	0	10.42	-5.8238	down	0.00053684	0.019036	-	-	-	-	-	-	-	-
TR7204_c2_g1	0	10.42	-5.8238	down	0.00053684	0.019036	-	-	-	-	-	-	-	-
TR17510_c0_g1	0.31	14.48	-5.3367	down	0.0005371	0.019036	uncharacterized protein LOC114297774 [Camellia sinensis]	-	-	-	-	-	-	-
TR43414_c1_g2	0.7	18.25	-4.7574	down	0.00053694	0.019036	-	-	-	-	-	-	-	-
TR13301_c0_g1	2.69	24.86	-3.2128	down	0.00053702	0.019036	subtilisin-like protease SBT3.5 [Camellia sinensis]	Subtilisin-like protease SBT1.7 OS=Arabidopsis thaliana OX=3702 GN=SBT1.7 PE=1 SV=1	-	-	-	-	-	-
TR3204_c0_g3	129.19	355.9	-1.4626	down	0.0005371	0.019036	-	-	-	-	-	-	-	-
TR47142_c0_g1	10.5	0	5.9032	up	0.00053716	0.019036	-	-	-	-	-	-	-	-
TR4230_c0_g1	233.66	83.16	1.4922	up	0.00053658	0.019034	uncharacterized protein LOC114260031 [Camellia sinensis]	-	-	-	-	-	-	-
TR245786_c0_g1	0	10.41	-5.822	down	0.00053627	0.019031	-	-	-	-	-	-	-	-
TR17166_c0_g1	128.8	49.42	1.3806	up	0.00053642	0.019031	uncharacterized protein LOC114313548 [Camellia sinensis]	-	-	-	-	-	-	-
TR191979_c0_g1	11.31	0	6.0093	up	0.00053636	0.019031	uncharacterized protein LOC114286132 [Camellia sinensis]|XP_028085007.1 uncharacterized protein LOC114286132 [Camellia sinensis]	-	Protein of unknown function (DUF1191)	-	-	-	-	-
TR19051_c0_g2	1.35	20.24	-3.9187	down	0.00053609	0.019027	-	-	-	-	-	-	-	-
TR115532_c0_g1	1.25	20.68	-3.9942	down	0.00053507	0.018995	uncharacterized protein LOC110632977 [Hevea brasiliensis]|XP_021637085.1 uncharacterized protein LOC110632977 [Hevea brasiliensis]	Regulator of nonsense transcripts 1 homolog OS=Arabidopsis thaliana OX=3702 GN=UPF1 PE=1 SV=2	AAA domain;AAA domain;AAA domain;AAA domain;Viral (Superfamily 1) RNA helicase	-	-	-	-	-
TR23807_c0_g2	13.98	0.3	5.3572	up	0.00053511	0.018995	60S ribosomal protein L34 [Citrus clementina]|ESR44380.1 hypothetical protein CICLE_v10013131mg [Citrus clementina]	60S ribosomal protein L34 OS=Pisum sativum OX=3888 GN=RPL34 PE=2 SV=1	-	-	-	-	-	-
TR108791_c0_g1	14.17	0.3	5.3741	up	0.00053494	0.018995	uncharacterized protein LOC114295976 [Camellia sinensis]	-	-	-	-	-	-	-
TR25267_c0_g2	10.22	0	5.8682	up	0.00053506	0.018995	-	Phytochrome A OS=Populus tremuloides OX=3693 GN=PHYA PE=2 SV=1	-	-	-	-	-	-
TR15860_c3_g1	10.69	0	5.9343	up	0.00053488	0.018995	-	-	-	-	-	-	-	-
TR87353_c0_g1	65.54	155.87	-1.2495	down	0.00053408	0.018972	-	-	-	-	-	-	-	-
TR5039_c3_g1	138.05	54	1.3544	up	0.0005341	0.018972	H/ACA ribonucleoprotein complex subunit 4-like [Camellia sinensis]	-	-	-	-	-	-	-
TR10677_c0_g1	11.78	0	6.0754	up	0.00053396	0.018972	-	-	-	-	-	-	-	-
TR10508_c0_g1	50.51	0	8.172	up	0.00053364	0.018964	aminopeptidase M1-like [Camellia sinensis]	Aminopeptidase M1-A OS=Oryza sativa subsp. japonica OX=39947 GN=Os02g0218200 PE=2 SV=1	-	-	-	-	-	-
TR5022_c1_g1	2.01	21.71	-3.4381	down	0.00053337	0.018957	-	-	-	-	-	-	-	-
TR32601_c0_g1	1.56	63.91	-5.3263	down	0.0005326	0.018935	unnamed protein product [Coffea canephora]	Beta-amyrin 28-monooxygenase OS=Vitis vinifera OX=29760 GN=CYP716A15 PE=1 SV=1	Cytochrome P450	-	-	-	-	-
TR5864_c0_g1	58.16	181.76	-1.6427	down	0.00053266	0.018935	serine/threonine protein phosphatase 2A 55 kDa regulatory subunit B beta isoform-like isoform X2 [Camellia sinensis]	Serine/threonine protein phosphatase 2A 55 kDa regulatory subunit B beta isoform OS=Arabidopsis thaliana OX=3702 GN=PP2AB2 PE=1 SV=1	WD domain, G-beta repeat	-	-	-	K04354|PPP2R2; serine/threonine-protein phosphatase 2A regulatory subunit B	ko03015(Genetic Information Processing);ko04071(Environmental Information Processing);ko04111(Cellular Processes);ko04151(Environmental Information Processing);ko04152(Environmental Information Processing);ko04261(Organismal Systems);ko04390(Environmental Information Processing);ko04391(Environmental Information Processing);ko04530(Cellular Processes);ko04728(Organismal Systems)
TR139642_c0_g1	166.61	24.37	2.7754	up	0.00053164	0.018907	protein argonaute 10-like [Camellia sinensis]|XP_028118114.1 protein argonaute 10-like [Camellia sinensis]|XP_028118115.1 protein argonaute 10-like [Camellia sinensis]|XP_028118116.1 protein argonaute 10-like [Camellia sinensis]|XP_028118117.1 protein argonaute 10-like [Camellia sinensis]|XP_028118119.1 protein argonaute 10-like [Camellia sinensis]	Protein argonaute 10 OS=Arabidopsis thaliana OX=3702 GN=AGO10 PE=2 SV=1	N-terminal domain of argonaute	-	-	-	-	-
TR25710_c0_g1	0	10.6	-5.8461	down	0.00053144	0.018902	-	-	-	-	-	-	-	-
TR6016_c1_g1	7.53	39.02	-2.366	down	0.00053133	0.018901	-	-	-	-	-	-	-	-
TR837_c7_g1	11.27	53.07	-2.2353	down	0.0005312	0.018899	-	-	-	-	-	-	-	-
TR9692_c2_g1	56.71	169.04	-1.5761	down	0.0005309	0.018891	E3 ubiquitin-protein ligase RHA1B-like [Camellia sinensis]	E3 ubiquitin-protein ligase RHA1B OS=Arabidopsis thaliana OX=3702 GN=RHA1B PE=2 SV=1	Ring finger domain;RING-like zinc finger;Zinc finger, C3HC4 type (RING finger);zinc-RING finger domain;RING-H2 zinc finger domain;Zinc finger, C3HC4 type (RING finger);Prokaryotic RING finger family 4;Anaphase-promoting complex subunit 11 RING-H2 finger;Zinc-ribbon, C4HC2 type	-	-	-	-	-
TR24193_c0_g1	18.78	0.91	4.3283	up	0.00053045	0.018878	-	-	-	-	-	-	-	-
TR2956_c0_g1	394.28	827.32	-1.069	down	0.00053033	0.018876	NAD(H) kinase 1 isoform X4 [Camellia sinensis]	NAD(H) kinase 1 OS=Arabidopsis thaliana OX=3702 GN=NADK1 PE=1 SV=2	ATP-NAD kinase;ATP-NAD kinase	-	-	-	K00858|ppnK, NADK; NAD+ kinase [EC:2.7.1.23]	ko00760(Metabolism);ko01100(Metabolism)
TR281665_c0_g1	10.45	0	5.9016	up	0.00052963	0.018854	-	-	-	-	-	-	-	-
TR568_c0_g2	1577.03	740.75	1.0901	up	0.00052949	0.018852	LOW QUALITY PROTEIN: glycerol kinase-like [Camellia sinensis]	Glycerol kinase OS=Arabidopsis thaliana OX=3702 GN=GLPK PE=1 SV=1	FGGY family of carbohydrate kinases, N-terminal domain;FGGY family of carbohydrate kinases, C-terminal domain	-	-	-	K00864|glpK, GK; glycerol kinase [EC:2.7.1.30]	ko00561(Metabolism);ko01100(Metabolism);ko03320(Organismal Systems);ko04626(Organismal Systems)
TR6571_c2_g1	40.33	120.17	-1.5709	down	0.00052929	0.018847	UDP-glycosyltransferase 91A1-like [Camellia sinensis]	UDP-glycosyltransferase 91A1 OS=Arabidopsis thaliana OX=3702 GN=UGT91A1 PE=2 SV=1	UDP-glucoronosyl and UDP-glucosyl transferase	-	-	-	-	-
TR8056_c0_g1	34.81	5.6	2.6265	up	0.00052823	0.018812	-	-	-	-	-	-	-	-
TR2895_c2_g1	295.1	137.32	1.1034	up	0.00052767	0.018795	transmembrane protein 209 [Camellia sinensis]	-	Cytochrome B561, N terminal	-	-	-	-	-
TR4438_c0_g2	19.94	0.95	4.3853	up	0.00052614	0.018743	-	-	-	-	-	-	-	-
TR15020_c0_g1	0.68	18.05	-4.7491	down	0.00052601	0.018741	uncharacterized protein LOC114261824 [Camellia sinensis]	-	-	-	-	-	-	-
TR14096_c0_g1	154.93	347.49	-1.1652	down	0.00052585	0.018738	uncharacterized protein LOC114311757 isoform X1 [Camellia sinensis]	-	-	-	-	-	-	-
TR123704_c0_g1	25.24	2.56	3.3058	up	0.00052524	0.018719	-	-	-	-	-	-	-	-
TR33829_c1_g1	19.13	1.3	3.9008	up	0.00052495	0.018711	-	-	-	-	-	-	-	-
TR11929_c0_g1	17.09	0.95	4.1647	up	0.00052479	0.018708	-	-	-	-	-	-	-	-
TR18448_c0_g1	10.69	0	5.9352	up	0.00052459	0.018704	-	-	-	-	-	-	-	-
TR49409_c1_g1	0.62	41.05	-5.9883	down	0.00052424	0.018694	mitochondrial outer membrane protein porin of 36 kDa-like isoform X1 [Camellia sinensis]	Mitochondrial outer membrane protein porin of 36 kDa OS=Solanum tuberosum OX=4113 PE=1 SV=2	Eukaryotic porin	-	-	-	K15040|VDAC2; voltage-dependent anion channel protein 2	ko04020(Environmental Information Processing);ko04022(Environmental Information Processing);ko04216(Cellular Processes);ko04217(Cellular Processes);ko04218(Cellular Processes);ko04621(Organismal Systems);ko04979(Organismal Systems)
TR23612_c0_g1	10.53	0	5.9071	up	0.00052409	0.018691	probable histone H2A.5 [Camellia sinensis]	Histone H2A.1 OS=Solanum lycopersicum OX=4081 PE=2 SV=1	C-terminus of histone H2A;Core histone H2A/H2B/H3/H4	-	-	-	K11251|H2A; histone H2A	ko04217(Cellular Processes)
TR8807_c0_g1	109	31.28	1.8	up	0.00052396	0.018689	peroxiredoxin-2B-like [Camellia sinensis]	Peroxiredoxin-2E-1, chloroplastic OS=Oryza sativa subsp. japonica OX=39947 GN=PRXIIE-1 PE=2 SV=1	Redoxin	-	-	-	-	-
TR44041_c0_g1	14.07	0.3	5.3653	up	0.00052333	0.018669	E3 ubiquitin-protein ligase UPL6-like isoform X2 [Camellia sinensis]	-	-	-	-	-	-	-
TR8059_c0_g1	45.44	129.41	-1.5114	down	0.00052202	0.018627	-	L-ascorbate peroxidase 1, cytosolic OS=Arabidopsis thaliana OX=3702 GN=APX1 PE=1 SV=2	-	-	-	-	-	-
TR1927_c0_g1	230.12	484.33	-1.0737	down	0.00052195	0.018627	NEDD8-specific protease 1-like isoform X1 [Camellia sinensis]|XP_028087247.1 NEDD8-specific protease 1-like isoform X1 [Camellia sinensis]|XP_028087248.1 NEDD8-specific protease 1-like isoform X1 [Camellia sinensis]|XP_028087249.1 NEDD8-specific protease 1-like isoform X1 [Camellia sinensis]|XP_028087250.1 NEDD8-specific protease 1-like isoform X1 [Camellia sinensis]|XP_028087251.1 NEDD8-specific…	NEDD8-specific protease 1 OS=Arabidopsis thaliana OX=3702 GN=NEDP1 PE=2 SV=1	Ulp1 protease family, C-terminal catalytic domain	-	-	-	-	-
TR54328_c0_g1	17.45	0.66	4.7612	up	0.00052206	0.018627	Potassium transporter like [Actinidia chinensis var. chinensis]	Potassium transporter 4 OS=Arabidopsis thaliana OX=3702 GN=POT4 PE=1 SV=2	-	-	-	-	-	-
TR10158_c0_g2	8.62	39.36	-2.1887	down	0.00052153	0.018621	-	-	-	-	-	-	-	-
TR1969_c2_g1	21.35	74.83	-1.8114	down	0.00052167	0.018621	-	-	-	-	-	-	-	-
TR1768_c1_g2	0	10.78	-5.8723	down	0.00052103	0.018606	-	-	-	-	-	-	-	-
TR10821_c0_g1	16.75	0.64	4.7214	up	0.00052092	0.018605	Sugar/inositol transporter [Macleaya cordata]	Sugar transporter ERD6-like 7 OS=Arabidopsis thaliana OX=3702 GN=At2g48020 PE=2 SV=2	Sugar (and other) transporter;Major Facilitator Superfamily;Sugar (and other) transporter;Major Facilitator Superfamily	-	-	-	-	-
TR11216_c0_g3	0	10.45	-5.8276	down	0.00051942	0.018554	-	-	-	-	-	-	-	-
TR33027_c0_g1	0	10.45	-5.8276	down	0.00051942	0.018554	-	-	-	-	-	-	-	-
[truncated: 6,976 more rows]
