# Supplementary material for: Transcriptome and metabolome analyses provide insights into the relevance of pericarp thickness variations in Camellia drupifera and Camellia oleifera
Source: Front Plant Sci. 2022 Oct 27;13:1016475. doi: 10.3389/fpls.2022.1016475 (PMC9647060; doi:10.3389/fpls.2022.1016475)
Supplement: Supplementary Table 4 — GO functional enrichment analysis performed on DEGs. [file Table_4.xlsx]

## Sheet: ALL
GO functional enrichment analysis performed on DEGs.
GO_ID	Term	Category	Test	Ref	TestAll	RefAll	geneID	Pvalue	FDR	richFactor
GO:0003735	structural constituent of ribosome	MF	15	1090	54	15836	TR11823_c0_g1,TR169525_c0_g2,TR20991_c0_g1,TR23303_c0_g1,TR31443_c0_g4,TR42615_c0_g1,TR70654_c0_g1,TR77467_c0_g2,TR69912_c0_g2,TR7729_c0_g1,TR77710_c0_g1,TR20992_c0_g1,TR28841_c0_g1,TR33502_c1_g3,TR77589_c1_g4	2.26515e-06	0.00129793	0.0137615
GO:0005840	ribosome	CC	15	1266	54	15836	TR20991_c0_g1,TR33502_c1_g3,TR11823_c0_g1,TR42615_c0_g1,TR169525_c0_g2,TR23303_c0_g1,TR31443_c0_g4,TR70654_c0_g1,TR77467_c0_g2,TR69912_c0_g2,TR7729_c0_g1,TR77710_c0_g1,TR20992_c0_g1,TR28841_c0_g1,TR77589_c1_g4	1.40844e-05	0.00319918	0.0118483
GO:0006518	peptide metabolic process	BP	17	1651	54	15836	TR20991_c0_g1,TR6811_c0_g1,TR11823_c0_g1,TR169525_c0_g2,TR23303_c0_g1,TR31443_c0_g4,TR42615_c0_g1,TR70654_c0_g1,TR77467_c0_g2,TR69912_c0_g2,TR77710_c0_g1,TR20992_c0_g1,TR28841_c0_g1,TR33502_c1_g3,TR77589_c1_g4,TR65448_c0_g1,TR7729_c0_g1	2.04024e-05	0.00319918	0.0102968
GO:0005198	structural molecule activity	MF	15	1316	54	15836	TR11823_c0_g1,TR169525_c0_g2,TR20991_c0_g1,TR23303_c0_g1,TR31443_c0_g4,TR42615_c0_g1,TR70654_c0_g1,TR77467_c0_g2,TR69912_c0_g2,TR7729_c0_g1,TR77710_c0_g1,TR20992_c0_g1,TR28841_c0_g1,TR33502_c1_g3,TR77589_c1_g4	2.23328e-05	0.00319918	0.0113982
GO:0043603	cellular amide metabolic process	BP	17	1773	54	15836	TR20991_c0_g1,TR6811_c0_g1,TR11823_c0_g1,TR169525_c0_g2,TR23303_c0_g1,TR31443_c0_g4,TR42615_c0_g1,TR70654_c0_g1,TR77467_c0_g2,TR69912_c0_g2,TR77710_c0_g1,TR20992_c0_g1,TR28841_c0_g1,TR33502_c1_g3,TR77589_c1_g4,TR65448_c0_g1,TR7729_c0_g1	5.13278e-05	0.00516283	0.00958827
GO:0006412	translation	BP	16	1611	54	15836	TR20991_c0_g1,TR65448_c0_g1,TR7729_c0_g1,TR11823_c0_g1,TR169525_c0_g2,TR23303_c0_g1,TR31443_c0_g4,TR42615_c0_g1,TR70654_c0_g1,TR77467_c0_g2,TR69912_c0_g2,TR77710_c0_g1,TR20992_c0_g1,TR28841_c0_g1,TR33502_c1_g3,TR77589_c1_g4	6.02945e-05	0.00516283	0.00993172
GO:0043043	peptide biosynthetic process	BP	16	1617	54	15836	TR20991_c0_g1,TR11823_c0_g1,TR169525_c0_g2,TR23303_c0_g1,TR31443_c0_g4,TR42615_c0_g1,TR70654_c0_g1,TR77467_c0_g2,TR69912_c0_g2,TR77710_c0_g1,TR20992_c0_g1,TR28841_c0_g1,TR33502_c1_g3,TR77589_c1_g4,TR65448_c0_g1,TR7729_c0_g1	6.30712e-05	0.00516283	0.00989487
GO:0043604	amide biosynthetic process	BP	16	1701	54	15836	TR20991_c0_g1,TR11823_c0_g1,TR169525_c0_g2,TR23303_c0_g1,TR31443_c0_g4,TR42615_c0_g1,TR70654_c0_g1,TR77467_c0_g2,TR69912_c0_g2,TR77710_c0_g1,TR20992_c0_g1,TR28841_c0_g1,TR33502_c1_g3,TR77589_c1_g4,TR65448_c0_g1,TR7729_c0_g1	0.00011576	0.0082913	0.00940623
GO:0005737	cytoplasm	CC	31	5178	54	15836	TR20991_c0_g1,TR33502_c1_g3,TR11823_c0_g1,TR46620_c0_g3,TR9241_c0_g2,TR9894_c0_g1,TR123983_c0_g1,TR159997_c0_g1,TR169525_c0_g2,TR23303_c0_g1,TR31443_c0_g4,TR70654_c0_g1,TR77467_c0_g2,TR69912_c0_g2,TR7729_c0_g1,TR77710_c0_g1,TR20992_c0_g1,TR28841_c0_g1,TR77589_c1_g4,TR43707_c0_g1,TR35533_c0_g1,TR143_c0_g2,TR2468_c0_g1,TR60505_c0_g1,TR1106_c3_g1,TR42615_c0_g1,TR639_c1_g1,TR10703_c2_g1,TR2946_c0_g1,…	0.000157827	0.00935088	0.00598687
GO:0034641	cellular nitrogen compound metabolic process	BP	25	3681	54	15836	TR20991_c0_g1,TR6811_c0_g1,TR159997_c0_g1,TR60505_c0_g1,TR46620_c0_g3,TR11823_c0_g1,TR169525_c0_g2,TR23303_c0_g1,TR31443_c0_g4,TR42615_c0_g1,TR70654_c0_g1,TR77467_c0_g2,TR69912_c0_g2,TR77710_c0_g1,TR20992_c0_g1,TR28841_c0_g1,TR33502_c1_g3,TR77589_c1_g4,TR65448_c0_g1,TR7729_c0_g1,TR17775_c0_g2,TR2468_c0_g1,TR11503_c0_g1,TR143_c0_g2,TR9241_c0_g2	0.000163192	0.00935088	0.00679163
GO:1990904	ribonucleoprotein complex	CC	15	1586	54	15836	TR169525_c0_g2,TR23303_c0_g1,TR31443_c0_g4,TR70654_c0_g1,TR77467_c0_g2,TR69912_c0_g2,TR7729_c0_g1,TR77710_c0_g1,TR20992_c0_g1,TR28841_c0_g1,TR77589_c1_g4,TR42615_c0_g1,TR20991_c0_g1,TR33502_c1_g3,TR11823_c0_g1	0.000190316	0.00991374	0.00945776
GO:0043232	intracellular non-membrane-bounded organelle	CC	17	2011	54	15836	TR169525_c0_g2,TR23303_c0_g1,TR31443_c0_g4,TR70654_c0_g1,TR77467_c0_g2,TR69912_c0_g2,TR7729_c0_g1,TR77710_c0_g1,TR20992_c0_g1,TR28841_c0_g1,TR77589_c1_g4,TR11823_c0_g1,TR156723_c0_g2,TR20991_c0_g1,TR33502_c1_g3,TR42615_c0_g1,TR159997_c0_g1	0.000246574	0.0109339	0.00845351
GO:0043228	non-membrane-bounded organelle	CC	17	2012	54	15836	TR169525_c0_g2,TR23303_c0_g1,TR31443_c0_g4,TR70654_c0_g1,TR77467_c0_g2,TR69912_c0_g2,TR7729_c0_g1,TR77710_c0_g1,TR20992_c0_g1,TR28841_c0_g1,TR77589_c1_g4,TR11823_c0_g1,TR156723_c0_g2,TR20991_c0_g1,TR33502_c1_g3,TR42615_c0_g1,TR159997_c0_g1	0.000248065	0.0109339	0.0084493
GO:1901566	organonitrogen compound biosynthetic process	BP	19	2555	54	15836	TR20991_c0_g1,TR11823_c0_g1,TR169525_c0_g2,TR23303_c0_g1,TR31443_c0_g4,TR42615_c0_g1,TR70654_c0_g1,TR77467_c0_g2,TR69912_c0_g2,TR77710_c0_g1,TR20992_c0_g1,TR28841_c0_g1,TR33502_c1_g3,TR77589_c1_g4,TR65448_c0_g1,TR7729_c0_g1,TR17775_c0_g2,TR2468_c0_g1,TR123983_c0_g1	0.000498073	0.0203854	0.0074364
GO:0009058	biosynthetic process	BP	23	3598	54	15836	TR20991_c0_g1,TR159997_c0_g1,TR11823_c0_g1,TR169525_c0_g2,TR23303_c0_g1,TR31443_c0_g4,TR42615_c0_g1,TR70654_c0_g1,TR77467_c0_g2,TR69912_c0_g2,TR77710_c0_g1,TR20992_c0_g1,TR28841_c0_g1,TR33502_c1_g3,TR77589_c1_g4,TR65448_c0_g1,TR7729_c0_g1,TR639_c1_g1,TR17775_c0_g2,TR2946_c0_g1,TR2468_c0_g1,TR123983_c0_g1,TR55629_c0_g1	0.000895727	0.0342168	0.00639244
GO:0010467	gene expression	BP	19	2694	54	15836	TR20991_c0_g1,TR60505_c0_g1,TR46620_c0_g3,TR11823_c0_g1,TR169525_c0_g2,TR23303_c0_g1,TR31443_c0_g4,TR42615_c0_g1,TR70654_c0_g1,TR77467_c0_g2,TR69912_c0_g2,TR77710_c0_g1,TR20992_c0_g1,TR28841_c0_g1,TR33502_c1_g3,TR77589_c1_g4,TR65448_c0_g1,TR7729_c0_g1,TR159997_c0_g1	0.000975131	0.0349219	0.00705271
GO:0044444	cytoplasmic part	CC	26	4484	54	15836	TR46620_c0_g3,TR9241_c0_g2,TR9894_c0_g1,TR123983_c0_g1,TR159997_c0_g1,TR169525_c0_g2,TR23303_c0_g1,TR31443_c0_g4,TR70654_c0_g1,TR77467_c0_g2,TR69912_c0_g2,TR7729_c0_g1,TR77710_c0_g1,TR20992_c0_g1,TR28841_c0_g1,TR77589_c1_g4,TR60505_c0_g1,TR1106_c3_g1,TR35533_c0_g1,TR42615_c0_g1,TR20991_c0_g1,TR33502_c1_g3,TR11823_c0_g1,TR43707_c0_g1,TR143_c0_g2,TR2468_c0_g1	0.00153815	0.0518448	0.00579839
GO:1901576	organic substance biosynthetic process	BP	22	3532	54	15836	TR20991_c0_g1,TR159997_c0_g1,TR11823_c0_g1,TR169525_c0_g2,TR23303_c0_g1,TR31443_c0_g4,TR42615_c0_g1,TR70654_c0_g1,TR77467_c0_g2,TR69912_c0_g2,TR77710_c0_g1,TR20992_c0_g1,TR28841_c0_g1,TR33502_c1_g3,TR77589_c1_g4,TR65448_c0_g1,TR7729_c0_g1,TR639_c1_g1,TR17775_c0_g2,TR2946_c0_g1,TR2468_c0_g1,TR123983_c0_g1	0.0017852	0.0568289	0.00622877
GO:0034645	cellular macromolecule biosynthetic process	BP	17	2403	54	15836	TR20991_c0_g1,TR159997_c0_g1,TR11823_c0_g1,TR169525_c0_g2,TR23303_c0_g1,TR31443_c0_g4,TR42615_c0_g1,TR70654_c0_g1,TR77467_c0_g2,TR69912_c0_g2,TR77710_c0_g1,TR20992_c0_g1,TR28841_c0_g1,TR33502_c1_g3,TR77589_c1_g4,TR65448_c0_g1,TR7729_c0_g1	0.00194685	0.0571541	0.00707449
GO:0044271	cellular nitrogen compound biosynthetic process	BP	19	2856	54	15836	TR20991_c0_g1,TR11823_c0_g1,TR169525_c0_g2,TR23303_c0_g1,TR31443_c0_g4,TR42615_c0_g1,TR70654_c0_g1,TR77467_c0_g2,TR69912_c0_g2,TR77710_c0_g1,TR20992_c0_g1,TR28841_c0_g1,TR33502_c1_g3,TR77589_c1_g4,TR65448_c0_g1,TR7729_c0_g1,TR17775_c0_g2,TR2468_c0_g1,TR159997_c0_g1	0.00199491	0.0571541	0.00665266
GO:0009059	macromolecule biosynthetic process	BP	17	2421	54	15836	TR20991_c0_g1,TR159997_c0_g1,TR11823_c0_g1,TR169525_c0_g2,TR23303_c0_g1,TR31443_c0_g4,TR42615_c0_g1,TR70654_c0_g1,TR77467_c0_g2,TR69912_c0_g2,TR77710_c0_g1,TR20992_c0_g1,TR28841_c0_g1,TR33502_c1_g3,TR77589_c1_g4,TR65448_c0_g1,TR7729_c0_g1	0.00211363	0.057672	0.00702189
GO:0009718	anthocyanin-containing compound biosynthetic process	BP	1	1	54	15836	TR2946_c0_g1	0.00340995	0.0630291	1
GO:0016137	glycoside metabolic process	BP	1	1	54	15836	TR2946_c0_g1	0.00340995	0.0630291	1
GO:0016138	glycoside biosynthetic process	BP	1	1	54	15836	TR2946_c0_g1	0.00340995	0.0630291	1
GO:0033485	cyanidin 3-O-glucoside biosynthetic process	BP	1	1	54	15836	TR2946_c0_g1	0.00340995	0.0630291	1
GO:0033486	delphinidin 3-O-glucoside biosynthetic process	BP	1	1	54	15836	TR2946_c0_g1	0.00340995	0.0630291	1
GO:0046283	anthocyanin-containing compound metabolic process	BP	1	1	54	15836	TR2946_c0_g1	0.00340995	0.0630291	1
GO:1901038	cyanidin 3-O-glucoside metabolic process	BP	1	1	54	15836	TR2946_c0_g1	0.00340995	0.0630291	1
GO:1901804	beta-glucoside metabolic process	BP	1	1	54	15836	TR2946_c0_g1	0.00340995	0.0630291	1
GO:1901806	beta-glucoside biosynthetic process	BP	1	1	54	15836	TR2946_c0_g1	0.00340995	0.0630291	1
GO:0045548	phenylalanine ammonia-lyase activity	MF	1	1	54	15836	TR99728_c0_g1	0.00340995	0.0630291	1
GO:0044249	cellular biosynthetic process	BP	21	3485	54	15836	TR20991_c0_g1,TR159997_c0_g1,TR11823_c0_g1,TR169525_c0_g2,TR23303_c0_g1,TR31443_c0_g4,TR42615_c0_g1,TR70654_c0_g1,TR77467_c0_g2,TR69912_c0_g2,TR77710_c0_g1,TR20992_c0_g1,TR28841_c0_g1,TR33502_c1_g3,TR77589_c1_g4,TR65448_c0_g1,TR7729_c0_g1,TR639_c1_g1,TR17775_c0_g2,TR2468_c0_g1,TR123983_c0_g1	0.00368567	0.0659966	0.00602582
GO:0044424	intracellular part	CC	32	6407	54	15836	TR639_c1_g1,TR10703_c2_g1,TR2946_c0_g1,TR6811_c0_g1,TR99728_c0_g1,TR2468_c0_g1,TR43707_c0_g1,TR46620_c0_g3,TR9241_c0_g2,TR9894_c0_g1,TR123983_c0_g1,TR159997_c0_g1,TR169525_c0_g2,TR23303_c0_g1,TR31443_c0_g4,TR70654_c0_g1,TR77467_c0_g2,TR69912_c0_g2,TR7729_c0_g1,TR77710_c0_g1,TR20992_c0_g1,TR28841_c0_g1,TR77589_c1_g4,TR60505_c0_g1,TR1106_c3_g1,TR35533_c0_g1,TR11823_c0_g1,TR156723_c0_g2,TR20991_c0_g…	0.00399275	0.0693287	0.00499454
GO:0071704	organic substance metabolic process	BP	30	5918	54	15836	TR20991_c0_g1,TR499_c0_g2,TR6811_c0_g1,TR159997_c0_g1,TR60505_c0_g1,TR46620_c0_g3,TR11823_c0_g1,TR169525_c0_g2,TR23303_c0_g1,TR31443_c0_g4,TR42615_c0_g1,TR70654_c0_g1,TR77467_c0_g2,TR69912_c0_g2,TR77710_c0_g1,TR20992_c0_g1,TR28841_c0_g1,TR33502_c1_g3,TR77589_c1_g4,TR65448_c0_g1,TR7729_c0_g1,TR639_c1_g1,TR17775_c0_g2,TR2946_c0_g1,TR2468_c0_g1,TR11503_c0_g1,TR99728_c0_g1,TR123983_c0_g1,TR143_c0_g2,…	0.00490655	0.0826897	0.00506928
GO:0009812	flavonoid metabolic process	BP	1	2	54	15836	TR2946_c0_g1	0.00680849	0.0866948	0.5
GO:0009813	flavonoid biosynthetic process	BP	1	2	54	15836	TR2946_c0_g1	0.00680849	0.0866948	0.5
GO:0035986	senescence-associated heterochromatin focus assembly	BP	1	2	54	15836	TR159997_c0_g1	0.00680849	0.0866948	0.5
GO:0090343	positive regulation of cell aging	BP	1	2	54	15836	TR159997_c0_g1	0.00680849	0.0866948	0.5
GO:0090402	oncogene-induced cell senescence	BP	1	2	54	15836	TR159997_c0_g1	0.00680849	0.0866948	0.5
GO:2000772	regulation of cellular senescence	BP	1	2	54	15836	TR159997_c0_g1	0.00680849	0.0866948	0.5
GO:2000774	positive regulation of cellular senescence	BP	1	2	54	15836	TR159997_c0_g1	0.00680849	0.0866948	0.5
GO:0001205	distal enhancer DNA-binding transcription activator activity, RNA polymerase II-specific	MF	1	2	54	15836	TR159997_c0_g1	0.00680849	0.0866948	0.5
GO:0016841	ammonia-lyase activity	MF	1	2	54	15836	TR99728_c0_g1	0.00680849	0.0866948	0.5
GO:0042975	peroxisome proliferator activated receptor binding	MF	1	2	54	15836	TR159997_c0_g1	0.00680849	0.0866948	0.5
GO:0035985	senescence-associated heterochromatin focus	CC	1	2	54	15836	TR159997_c0_g1	0.00680849	0.0866948	0.5
GO:0009536	plastid	CC	4	224	54	15836	TR143_c0_g2,TR2468_c0_g1,TR60505_c0_g1,TR1106_c3_g1	0.00709207	0.0883425	0.0178571
GO:0044267	cellular protein metabolic process	BP	16	2540	54	15836	TR20991_c0_g1,TR11823_c0_g1,TR169525_c0_g2,TR23303_c0_g1,TR31443_c0_g4,TR42615_c0_g1,TR70654_c0_g1,TR77467_c0_g2,TR69912_c0_g2,TR77710_c0_g1,TR20992_c0_g1,TR28841_c0_g1,TR33502_c1_g3,TR77589_c1_g4,TR65448_c0_g1,TR7729_c0_g1	0.00877412	0.0926971	0.00629921
GO:1901564	organonitrogen compound metabolic process	BP	22	3999	54	15836	TR20991_c0_g1,TR6811_c0_g1,TR11823_c0_g1,TR169525_c0_g2,TR23303_c0_g1,TR31443_c0_g4,TR42615_c0_g1,TR70654_c0_g1,TR77467_c0_g2,TR69912_c0_g2,TR77710_c0_g1,TR20992_c0_g1,TR28841_c0_g1,TR33502_c1_g3,TR77589_c1_g4,TR65448_c0_g1,TR7729_c0_g1,TR17775_c0_g2,TR2468_c0_g1,TR123983_c0_g1,TR143_c0_g2,TR9241_c0_g2	0.00890782	0.0926971	0.00550138
GO:0006807	nitrogen compound metabolic process	BP	26	5042	54	15836	TR20991_c0_g1,TR6811_c0_g1,TR159997_c0_g1,TR60505_c0_g1,TR46620_c0_g3,TR11823_c0_g1,TR169525_c0_g2,TR23303_c0_g1,TR31443_c0_g4,TR42615_c0_g1,TR70654_c0_g1,TR77467_c0_g2,TR69912_c0_g2,TR77710_c0_g1,TR20992_c0_g1,TR28841_c0_g1,TR33502_c1_g3,TR77589_c1_g4,TR65448_c0_g1,TR7729_c0_g1,TR17775_c0_g2,TR2468_c0_g1,TR11503_c0_g1,TR123983_c0_g1,TR143_c0_g2,TR9241_c0_g2	0.00894102	0.0926971	0.00515668
GO:0043229	intracellular organelle	CC	26	5058	54	15836	TR46620_c0_g3,TR9241_c0_g2,TR9894_c0_g1,TR60505_c0_g1,TR1106_c3_g1,TR169525_c0_g2,TR23303_c0_g1,TR31443_c0_g4,TR70654_c0_g1,TR77467_c0_g2,TR69912_c0_g2,TR7729_c0_g1,TR77710_c0_g1,TR20992_c0_g1,TR28841_c0_g1,TR77589_c1_g4,TR11823_c0_g1,TR156723_c0_g2,TR35533_c0_g1,TR20991_c0_g1,TR33502_c1_g3,TR159997_c0_g1,TR43707_c0_g1,TR143_c0_g2,TR2468_c0_g1,TR42615_c0_g1	0.00934912	0.0926971	0.00514037
GO:0005622	intracellular	CC	32	6735	54	15836	TR20991_c0_g1,TR33502_c1_g3,TR11823_c0_g1,TR46620_c0_g3,TR9241_c0_g2,TR9894_c0_g1,TR123983_c0_g1,TR159997_c0_g1,TR169525_c0_g2,TR23303_c0_g1,TR31443_c0_g4,TR70654_c0_g1,TR77467_c0_g2,TR69912_c0_g2,TR7729_c0_g1,TR77710_c0_g1,TR20992_c0_g1,TR28841_c0_g1,TR77589_c1_g4,TR639_c1_g1,TR10703_c2_g1,TR2946_c0_g1,TR6811_c0_g1,TR99728_c0_g1,TR43707_c0_g1,TR35533_c0_g1,TR156723_c0_g2,TR143_c0_g2,TR2468_c0_g1…	0.00967641	0.0926971	0.0047513
GO:0019042	viral latency	BP	1	3	54	15836	TR159997_c0_g1	0.0101957	0.0926971	0.333333
GO:0019043	establishment of viral latency	BP	1	3	54	15836	TR159997_c0_g1	0.0101957	0.0926971	0.333333
GO:0031507	heterochromatin assembly	BP	1	3	54	15836	TR159997_c0_g1	0.0101957	0.0926971	0.333333
GO:0043473	pigmentation	BP	1	3	54	15836	TR2946_c0_g1	0.0101957	0.0926971	0.333333
GO:0075713	establishment of integrated proviral latency	BP	1	3	54	15836	TR159997_c0_g1	0.0101957	0.0926971	0.333333
GO:0090342	regulation of cell aging	BP	1	3	54	15836	TR159997_c0_g1	0.0101957	0.0926971	0.333333
GO:0090398	cellular senescence	BP	1	3	54	15836	TR159997_c0_g1	0.0101957	0.0926971	0.333333
GO:0003680	AT DNA binding	MF	1	3	54	15836	TR159997_c0_g1	0.0101957	0.0926971	0.333333
GO:0046965	retinoid X receptor binding	MF	1	3	54	15836	TR159997_c0_g1	0.0101957	0.0926971	0.333333
GO:0051575	5'-deoxyribose-5-phosphate lyase activity	MF	1	3	54	15836	TR159997_c0_g1	0.0101957	0.0926971	0.333333
GO:0009535	chloroplast thylakoid membrane	CC	2	45	54	15836	TR143_c0_g2,TR2468_c0_g1	0.0102875	0.0926971	0.0444444
GO:0055035	plastid thylakoid membrane	CC	2	45	54	15836	TR143_c0_g2,TR2468_c0_g1	0.0102875	0.0926971	0.0444444
GO:0043226	organelle	CC	26	5095	54	15836	TR46620_c0_g3,TR9241_c0_g2,TR9894_c0_g1,TR60505_c0_g1,TR1106_c3_g1,TR169525_c0_g2,TR23303_c0_g1,TR31443_c0_g4,TR70654_c0_g1,TR77467_c0_g2,TR69912_c0_g2,TR7729_c0_g1,TR77710_c0_g1,TR20992_c0_g1,TR28841_c0_g1,TR77589_c1_g4,TR11823_c0_g1,TR156723_c0_g2,TR35533_c0_g1,TR20991_c0_g1,TR33502_c1_g3,TR159997_c0_g1,TR43707_c0_g1,TR143_c0_g2,TR2468_c0_g1,TR42615_c0_g1	0.0103536	0.0926971	0.00510304
GO:0009534	chloroplast thylakoid	CC	2	47	54	15836	TR143_c0_g2,TR2468_c0_g1	0.0111844	0.0971012	0.0425532
GO:0031976	plastid thylakoid	CC	2	47	54	15836	TR143_c0_g2,TR2468_c0_g1	0.0111844	0.0971012	0.0425532
GO:0042651	thylakoid membrane	CC	2	50	54	15836	TR143_c0_g2,TR2468_c0_g1	0.0125921	0.104726	0.04
GO:0043170	macromolecule metabolic process	BP	21	3869	54	15836	TR20991_c0_g1,TR159997_c0_g1,TR60505_c0_g1,TR46620_c0_g3,TR11823_c0_g1,TR169525_c0_g2,TR23303_c0_g1,TR31443_c0_g4,TR42615_c0_g1,TR70654_c0_g1,TR77467_c0_g2,TR69912_c0_g2,TR77710_c0_g1,TR20992_c0_g1,TR28841_c0_g1,TR33502_c1_g3,TR77589_c1_g4,TR65448_c0_g1,TR7729_c0_g1,TR499_c0_g2,TR11503_c0_g1	0.0129064	0.104726	0.00542776
GO:0006268	DNA unwinding involved in DNA replication	BP	1	4	54	15836	TR159997_c0_g1	0.0135715	0.104726	0.25
GO:0006337	nucleosome disassembly	BP	1	4	54	15836	TR159997_c0_g1	0.0135715	0.104726	0.25
GO:0032986	protein-DNA complex disassembly	BP	1	4	54	15836	TR159997_c0_g1	0.0135715	0.104726	0.25
GO:0070828	heterochromatin organization	BP	1	4	54	15836	TR159997_c0_g1	0.0135715	0.104726	0.25
GO:0003705	transcription factor activity, RNA polymerase II distal enhancer sequence-specific binding	MF	1	4	54	15836	TR159997_c0_g1	0.0135715	0.104726	0.25
GO:0042974	retinoic acid receptor binding	MF	1	4	54	15836	TR159997_c0_g1	0.0135715	0.104726	0.25
GO:0044237	cellular metabolic process	BP	28	5756	54	15836	TR20991_c0_g1,TR6811_c0_g1,TR159997_c0_g1,TR60505_c0_g1,TR46620_c0_g3,TR11823_c0_g1,TR169525_c0_g2,TR23303_c0_g1,TR31443_c0_g4,TR42615_c0_g1,TR70654_c0_g1,TR77467_c0_g2,TR69912_c0_g2,TR77710_c0_g1,TR20992_c0_g1,TR28841_c0_g1,TR33502_c1_g3,TR77589_c1_g4,TR65448_c0_g1,TR7729_c0_g1,TR639_c1_g1,TR99728_c0_g1,TR17775_c0_g2,TR2468_c0_g1,TR11503_c0_g1,TR123983_c0_g1,TR143_c0_g2,TR9241_c0_g2	0.0140619	0.104726	0.00486449
GO:0043207	response to external biotic stimulus	BP	2	53	54	15836	TR159997_c0_g1,TR35533_c0_g1	0.0140731	0.104726	0.0377358
GO:0051707	response to other organism	BP	2	53	54	15836	TR159997_c0_g1,TR35533_c0_g1	0.0140731	0.104726	0.0377358
GO:0009607	response to biotic stimulus	BP	2	56	54	15836	TR159997_c0_g1,TR35533_c0_g1	0.0156257	0.114203	0.0357143
GO:0044464	cell part	CC	32	6938	54	15836	TR639_c1_g1,TR10703_c2_g1,TR2946_c0_g1,TR6811_c0_g1,TR99728_c0_g1,TR2468_c0_g1,TR159997_c0_g1,TR43707_c0_g1,TR46620_c0_g3,TR9241_c0_g2,TR9894_c0_g1,TR169525_c0_g2,TR23303_c0_g1,TR31443_c0_g4,TR70654_c0_g1,TR77467_c0_g2,TR69912_c0_g2,TR7729_c0_g1,TR77710_c0_g1,TR20992_c0_g1,TR28841_c0_g1,TR77589_c1_g4,TR11823_c0_g1,TR156723_c0_g2,TR60505_c0_g1,TR1106_c3_g1,TR123983_c0_g1,TR20991_c0_g1,TR33502_c1_g…	0.0159342	0.114203	0.00461228
GO:0008152	metabolic process	BP	35	7830	54	15836	TR20991_c0_g1,TR499_c0_g2,TR49662_c0_g1,TR3180_c6_g1,TR5959_c1_g1,TR6811_c0_g1,TR159997_c0_g1,TR60505_c0_g1,TR46620_c0_g3,TR11823_c0_g1,TR169525_c0_g2,TR23303_c0_g1,TR31443_c0_g4,TR42615_c0_g1,TR70654_c0_g1,TR77467_c0_g2,TR69912_c0_g2,TR77710_c0_g1,TR20992_c0_g1,TR28841_c0_g1,TR33502_c1_g3,TR77589_c1_g4,TR65448_c0_g1,TR7729_c0_g1,TR639_c1_g1,TR99728_c0_g1,TR17775_c0_g2,TR55629_c0_g1,TR2946_c0_g1,…	0.016315	0.114203	0.00446999
GO:0006284	base-excision repair	BP	1	5	54	15836	TR159997_c0_g1	0.016936	0.114203	0.2
GO:0031936	negative regulation of chromatin silencing	BP	1	5	54	15836	TR159997_c0_g1	0.016936	0.114203	0.2
GO:0003906	DNA-(apurinic or apyrimidinic site) endonuclease activity	MF	1	5	54	15836	TR159997_c0_g1	0.016936	0.114203	0.2
GO:0030374	nuclear receptor transcription coactivator activity	MF	1	5	54	15836	TR159997_c0_g1	0.016936	0.114203	0.2
GO:0005623	cell	CC	32	6964	54	15836	TR20991_c0_g1,TR33502_c1_g3,TR11823_c0_g1,TR46620_c0_g3,TR9241_c0_g2,TR9894_c0_g1,TR123983_c0_g1,TR159997_c0_g1,TR169525_c0_g2,TR23303_c0_g1,TR31443_c0_g4,TR70654_c0_g1,TR77467_c0_g2,TR69912_c0_g2,TR7729_c0_g1,TR77710_c0_g1,TR20992_c0_g1,TR28841_c0_g1,TR77589_c1_g4,TR639_c1_g1,TR10703_c2_g1,TR2946_c0_g1,TR6811_c0_g1,TR99728_c0_g1,TR43707_c0_g1,TR35533_c0_g1,TR156723_c0_g2,TR143_c0_g2,TR2468_c0_g1…	0.0169412	0.114203	0.00459506
GO:0016765	transferase activity, transferring alkyl or aryl (other than methyl) groups	MF	2	59	54	15836	TR6811_c0_g1,TR639_c1_g1	0.0172484	0.114923	0.0338983
GO:0003674	molecular_function	MF	47	11768	54	15836	TR156723_c0_g2,TR35533_c0_g1,TR99728_c0_g1,TR159997_c0_g1,TR24295_c0_g1,TR3263_c3_g1,TR22233_c0_g1,TR42615_c0_g1,TR33502_c1_g3,TR11823_c0_g1,TR169525_c0_g2,TR20991_c0_g1,TR23303_c0_g1,TR31443_c0_g4,TR70654_c0_g1,TR77467_c0_g2,TR69912_c0_g2,TR7729_c0_g1,TR77710_c0_g1,TR20992_c0_g1,TR28841_c0_g1,TR77589_c1_g4,TR65448_c0_g1,TR2468_c0_g1,TR5978_c0_g1,TR6811_c0_g1,TR123983_c0_g1,TR639_c1_g1,TR49662_c0…	0.018352	0.12087	0.00399388
GO:0019538	protein metabolic process	BP	16	2768	54	15836	TR20991_c0_g1,TR11823_c0_g1,TR169525_c0_g2,TR23303_c0_g1,TR31443_c0_g4,TR42615_c0_g1,TR70654_c0_g1,TR77467_c0_g2,TR69912_c0_g2,TR77710_c0_g1,TR20992_c0_g1,TR28841_c0_g1,TR33502_c1_g3,TR77589_c1_g4,TR65448_c0_g1,TR7729_c0_g1	0.0193722	0.12614	0.00578035
GO:0031935	regulation of chromatin silencing	BP	1	6	54	15836	TR159997_c0_g1	0.0202893	0.130626	0.166667
GO:0032991	protein-containing complex	CC	17	3044	54	15836	TR169525_c0_g2,TR23303_c0_g1,TR31443_c0_g4,TR70654_c0_g1,TR77467_c0_g2,TR69912_c0_g2,TR7729_c0_g1,TR77710_c0_g1,TR20992_c0_g1,TR28841_c0_g1,TR77589_c1_g4,TR42615_c0_g1,TR159997_c0_g1,TR2468_c0_g1,TR20991_c0_g1,TR33502_c1_g3,TR11823_c0_g1	0.0215073	0.13693	0.00558476
GO:0031498	chromatin disassembly	BP	1	7	54	15836	TR159997_c0_g1	0.0236313	0.145599	0.142857
GO:0060969	negative regulation of gene silencing	BP	1	7	54	15836	TR159997_c0_g1	0.0236313	0.145599	0.142857
GO:1905268	negative regulation of chromatin organization	BP	1	7	54	15836	TR159997_c0_g1	0.0236313	0.145599	0.142857
GO:0008137	NADH dehydrogenase (ubiquinone) activity	MF	2	74	54	15836	TR143_c0_g2,TR9241_c0_g2	0.0263608	0.160689	0.027027
GO:0060968	regulation of gene silencing	BP	1	8	54	15836	TR159997_c0_g1	0.0269621	0.16093	0.125
GO:0004364	glutathione transferase activity	MF	1	8	54	15836	TR6811_c0_g1	0.0269621	0.16093	0.125
GO:0050136	NADH dehydrogenase (quinone) activity	MF	2	76	54	15836	TR143_c0_g2,TR9241_c0_g2	0.0276954	0.163602	0.0263158
GO:0016655	oxidoreductase activity, acting on NAD(P)H, quinone or similar compound as acceptor	MF	2	77	54	15836	TR143_c0_g2,TR9241_c0_g2	0.0283727	0.165894	0.025974
GO:0006952	defense response	BP	2	78	54	15836	TR35533_c0_g1,TR99728_c0_g1	0.0290567	0.16614	0.025641
GO:0046034	ATP metabolic process	BP	4	343	54	15836	TR17775_c0_g2,TR2468_c0_g1,TR143_c0_g2,TR9241_c0_g2	0.0292861	0.16614	0.0116618
GO:0042773	ATP synthesis coupled electron transport	BP	2	79	54	15836	TR143_c0_g2,TR9241_c0_g2	0.0297473	0.16614	0.0253165
GO:0045815	positive regulation of gene expression, epigenetic	BP	1	9	54	15836	TR159997_c0_g1	0.0302818	0.16614	0.111111
GO:0004410	homocitrate synthase activity	MF	1	9	54	15836	TR123983_c0_g1	0.0302818	0.16614	0.111111
GO:0016840	carbon-nitrogen lyase activity	MF	1	9	54	15836	TR99728_c0_g1	0.0302818	0.16614	0.111111
GO:0044434	chloroplast part	CC	2	80	54	15836	TR143_c0_g2,TR2468_c0_g1	0.0304445	0.16614	0.025
GO:0003954	NADH dehydrogenase activity	MF	2	81	54	15836	TR143_c0_g2,TR9241_c0_g2	0.0311482	0.167044	0.0246914
GO:0004601	peroxidase activity	MF	2	82	54	15836	TR3180_c6_g1,TR5959_c1_g1	0.0318582	0.167044	0.0243902
GO:0044435	plastid part	CC	2	82	54	15836	TR143_c0_g2,TR2468_c0_g1	0.0318582	0.167044	0.0243902
GO:0009144	purine nucleoside triphosphate metabolic process	BP	4	353	54	15836	TR17775_c0_g2,TR2468_c0_g1,TR143_c0_g2,TR9241_c0_g2	0.0320678	0.167044	0.0113314
GO:0009205	purine ribonucleoside triphosphate metabolic process	BP	4	353	54	15836	TR17775_c0_g2,TR2468_c0_g1,TR143_c0_g2,TR9241_c0_g2	0.0320678	0.167044	0.0113314
GO:0008171	O-methyltransferase activity	MF	1	10	54	15836	TR2946_c0_g1	0.0335904	0.173399	0.1
GO:0098869	cellular oxidant detoxification	BP	2	85	54	15836	TR3180_c6_g1,TR5959_c1_g1	0.0340267	0.174083	0.0235294
GO:0044238	primary metabolic process	BP	26	5596	54	15836	TR20991_c0_g1,TR499_c0_g2,TR159997_c0_g1,TR60505_c0_g1,TR46620_c0_g3,TR11823_c0_g1,TR169525_c0_g2,TR23303_c0_g1,TR31443_c0_g4,TR42615_c0_g1,TR70654_c0_g1,TR77467_c0_g2,TR69912_c0_g2,TR77710_c0_g1,TR20992_c0_g1,TR28841_c0_g1,TR33502_c1_g3,TR77589_c1_g4,TR65448_c0_g1,TR7729_c0_g1,TR17775_c0_g2,TR2468_c0_g1,TR11503_c0_g1,TR123983_c0_g1,TR143_c0_g2,TR9241_c0_g2	0.0354813	0.178966	0.00464618
GO:0009199	ribonucleoside triphosphate metabolic process	BP	4	365	54	15836	TR17775_c0_g2,TR2468_c0_g1,TR143_c0_g2,TR9241_c0_g2	0.0356058	0.178966	0.0109589
GO:0009141	nucleoside triphosphate metabolic process	BP	4	368	54	15836	TR17775_c0_g2,TR2468_c0_g1,TR143_c0_g2,TR9241_c0_g2	0.0365246	0.181988	0.0108696
GO:0000792	heterochromatin	CC	1	11	54	15836	TR159997_c0_g1	0.0368879	0.182213	0.0909091
GO:0016684	oxidoreductase activity, acting on peroxide as acceptor	MF	2	92	54	15836	TR3180_c6_g1,TR5959_c1_g1	0.0393027	0.191761	0.0217391
GO:0009987	cellular process	BP	31	7061	54	15836	TR20991_c0_g1,TR35533_c0_g1,TR6811_c0_g1,TR159997_c0_g1,TR60505_c0_g1,TR46620_c0_g3,TR11823_c0_g1,TR169525_c0_g2,TR23303_c0_g1,TR31443_c0_g4,TR42615_c0_g1,TR70654_c0_g1,TR77467_c0_g2,TR69912_c0_g2,TR77710_c0_g1,TR20992_c0_g1,TR28841_c0_g1,TR33502_c1_g3,TR77589_c1_g4,TR65448_c0_g1,TR7729_c0_g1,TR639_c1_g1,TR99728_c0_g1,TR17775_c0_g2,TR2468_c0_g1,TR11503_c0_g1,TR123983_c0_g1,TR143_c0_g2,TR9241_c0_g…	0.0394901	0.191761	0.00439031
GO:0044260	cellular macromolecule metabolic process	BP	17	3264	54	15836	TR20991_c0_g1,TR159997_c0_g1,TR11823_c0_g1,TR169525_c0_g2,TR23303_c0_g1,TR31443_c0_g4,TR42615_c0_g1,TR70654_c0_g1,TR77467_c0_g2,TR69912_c0_g2,TR77710_c0_g1,TR20992_c0_g1,TR28841_c0_g1,TR33502_c1_g3,TR77589_c1_g4,TR65448_c0_g1,TR7729_c0_g1	0.0399533	0.19238	0.00520833
GO:0034357	photosynthetic membrane	CC	2	94	54	15836	TR143_c0_g2,TR2468_c0_g1	0.040864	0.195125	0.0212766
GO:0006119	oxidative phosphorylation	BP	2	95	54	15836	TR143_c0_g2,TR9241_c0_g2	0.0416533	0.196037	0.0210526
GO:0032984	protein-containing complex disassembly	BP	2	96	54	15836	TR159997_c0_g1,TR65448_c0_g1	0.0424485	0.196037	0.0208333
GO:0044436	thylakoid part	CC	2	96	54	15836	TR143_c0_g2,TR2468_c0_g1	0.0424485	0.196037	0.0208333
GO:0022904	respiratory electron transport chain	BP	2	97	54	15836	TR143_c0_g2,TR9241_c0_g2	0.0432493	0.196037	0.0206186
GO:1990748	cellular detoxification	BP	2	97	54	15836	TR3180_c6_g1,TR5959_c1_g1	0.0432493	0.196037	0.0206186
GO:0009615	response to virus	BP	1	13	54	15836	TR159997_c0_g1	0.0434498	0.196037	0.0769231
GO:0019878	lysine biosynthetic process via aminoadipic acid	BP	1	13	54	15836	TR123983_c0_g1	0.0434498	0.196037	0.0769231
GO:0098754	detoxification	BP	2	98	54	15836	TR3180_c6_g1,TR5959_c1_g1	0.0440559	0.197219	0.0204082
GO:0009126	purine nucleoside monophosphate metabolic process	BP	4	397	54	15836	TR17775_c0_g2,TR2468_c0_g1,TR143_c0_g2,TR9241_c0_g2	0.0461159	0.203265	0.0100756
GO:0009167	purine ribonucleoside monophosphate metabolic process	BP	4	397	54	15836	TR17775_c0_g2,TR2468_c0_g1,TR143_c0_g2,TR9241_c0_g2	0.0461159	0.203265	0.0100756
GO:0008553	proton-exporting ATPase activity, phosphorylative mechanism	MF	1	14	54	15836	TR17775_c0_g2	0.0467143	0.20433	0.0714286
GO:0009161	ribonucleoside monophosphate metabolic process	BP	4	409	54	15836	TR17775_c0_g2,TR2468_c0_g1,TR143_c0_g2,TR9241_c0_g2	0.0504616	0.219049	0.00977995
GO:0009123	nucleoside monophosphate metabolic process	BP	4	411	54	15836	TR17775_c0_g2,TR2468_c0_g1,TR143_c0_g2,TR9241_c0_g2	0.0512073	0.220615	0.00973236
GO:0097237	cellular response to toxic substance	BP	2	108	54	15836	TR3180_c6_g1,TR5959_c1_g1	0.0524228	0.220939	0.0185185
GO:0006452	translational frameshifting	BP	1	16	54	15836	TR65448_c0_g1	0.0532104	0.220939	0.0625
GO:0045901	positive regulation of translational elongation	BP	1	16	54	15836	TR65448_c0_g1	0.0532104	0.220939	0.0625
GO:0045905	positive regulation of translational termination	BP	1	16	54	15836	TR65448_c0_g1	0.0532104	0.220939	0.0625
GO:0001228	DNA-binding transcription activator activity, RNA polymerase II-specific	MF	1	16	54	15836	TR159997_c0_g1	0.0532104	0.220939	0.0625
GO:0006449	regulation of translational termination	BP	1	17	54	15836	TR65448_c0_g1	0.0564422	0.227756	0.0588235
GO:0043243	positive regulation of protein complex disassembly	BP	1	17	54	15836	TR65448_c0_g1	0.0564422	0.227756	0.0588235
GO:0035257	nuclear hormone receptor binding	MF	1	17	54	15836	TR159997_c0_g1	0.0564422	0.227756	0.0588235
GO:0051427	hormone receptor binding	MF	1	17	54	15836	TR159997_c0_g1	0.0564422	0.227756	0.0588235
GO:0022900	electron transport chain	BP	2	115	54	15836	TR143_c0_g2,TR9241_c0_g2	0.0585901	0.230993	0.0173913
GO:0005509	calcium ion binding	MF	2	116	54	15836	TR24295_c0_g1,TR3263_c3_g1	0.059491	0.230993	0.0172414
GO:0019829	cation-transporting ATPase activity	MF	2	116	54	15836	TR2468_c0_g1,TR17775_c0_g2	0.059491	0.230993	0.0172414
GO:0022853	active ion transmembrane transporter activity	MF	2	116	54	15836	TR2468_c0_g1,TR17775_c0_g2	0.059491	0.230993	0.0172414
GO:0042625	ATPase coupled ion transmembrane transporter activity	MF	2	116	54	15836	TR2468_c0_g1,TR17775_c0_g2	0.059491	0.230993	0.0172414
GO:0006556	S-adenosylmethionine biosynthetic process	BP	1	18	54	15836	TR639_c1_g1	0.0596631	0.230993	0.0555556
GO:0016209	antioxidant activity	MF	2	117	54	15836	TR3180_c6_g1,TR5959_c1_g1	0.0603967	0.232264	0.017094
GO:0004478	methionine adenosyltransferase activity	MF	1	19	54	15836	TR639_c1_g1	0.0628733	0.238585	0.0526316
GO:0015662	ATPase activity, coupled to transmembrane movement of ions, phosphorylative mechanism	MF	1	19	54	15836	TR17775_c0_g2	0.0628733	0.238585	0.0526316
GO:0009579	thylakoid	CC	2	123	54	15836	TR143_c0_g2,TR2468_c0_g1	0.0659298	0.244256	0.0162602
GO:0006448	regulation of translational elongation	BP	1	20	54	15836	TR65448_c0_g1	0.0660727	0.244256	0.05
GO:0032508	DNA duplex unwinding	BP	1	20	54	15836	TR159997_c0_g1	0.0660727	0.244256	0.05
GO:0098542	defense response to other organism	BP	1	20	54	15836	TR35533_c0_g1	0.0660727	0.244256	0.05
GO:0009636	response to toxic substance	BP	2	124	54	15836	TR3180_c6_g1,TR5959_c1_g1	0.0668682	0.245612	0.016129
GO:0009150	purine ribonucleotide metabolic process	BP	4	461	54	15836	TR17775_c0_g2,TR2468_c0_g1,TR143_c0_g2,TR9241_c0_g2	0.0718176	0.262111	0.00867679
GO:0032392	DNA geometric change	BP	1	22	54	15836	TR159997_c0_g1	0.0724394	0.26228	0.0454545
GO:0006950	response to stress	BP	5	658	54	15836	TR99728_c0_g1,TR159997_c0_g1,TR3180_c6_g1,TR35533_c0_g1,TR44_c2_g1	0.0727793	0.26228	0.00759878
GO:0022411	cellular component disassembly	BP	2	132	54	15836	TR159997_c0_g1,TR65448_c0_g1	0.0745333	0.266922	0.0151515
GO:0006163	purine nucleotide metabolic process	BP	4	474	54	15836	TR17775_c0_g2,TR2468_c0_g1,TR143_c0_g2,TR9241_c0_g2	0.0777855	0.275192	0.00843882
GO:0009259	ribonucleotide metabolic process	BP	4	475	54	15836	TR17775_c0_g2,TR2468_c0_g1,TR143_c0_g2,TR9241_c0_g2	0.0782548	0.275192	0.00842105
GO:0006749	glutathione metabolic process	BP	1	24	54	15836	TR6811_c0_g1	0.0787634	0.275192	0.0416667
GO:0048038	quinone binding	MF	1	24	54	15836	TR143_c0_g2	0.0787634	0.275192	0.0416667
GO:0046500	S-adenosylmethionine metabolic process	BP	1	25	54	15836	TR639_c1_g1	0.0819096	0.27937	0.04
GO:1902275	regulation of chromatin organization	BP	1	25	54	15836	TR159997_c0_g1	0.0819096	0.27937	0.04
GO:0070181	small ribosomal subunit rRNA binding	MF	1	25	54	15836	TR11823_c0_g1	0.0819096	0.27937	0.04
GO:0090575	RNA polymerase II transcription factor complex	CC	1	25	54	15836	TR159997_c0_g1	0.0819096	0.27937	0.04
GO:0016651	oxidoreductase activity, acting on NAD(P)H	MF	2	141	54	15836	TR143_c0_g2,TR9241_c0_g2	0.0834756	0.283027	0.0141844
GO:0003713	transcription coactivator activity	MF	1	26	54	15836	TR159997_c0_g1	0.0850451	0.286652	0.0384615
GO:0006414	translational elongation	BP	2	145	54	15836	TR65448_c0_g1,TR7729_c0_g1	0.0875515	0.293374	0.0137931
GO:0009605	response to external stimulus	BP	2	146	54	15836	TR159997_c0_g1,TR35533_c0_g1	0.0885798	0.295094	0.0136986
GO:0017144	drug metabolic process	BP	5	700	54	15836	TR639_c1_g1,TR17775_c0_g2,TR2468_c0_g1,TR143_c0_g2,TR9241_c0_g2	0.0893215	0.295845	0.00714286
GO:0006553	lysine metabolic process	BP	1	28	54	15836	TR123983_c0_g1	0.0912848	0.298893	0.0357143
GO:0009085	lysine biosynthetic process	BP	1	28	54	15836	TR123983_c0_g1	0.0912848	0.298893	0.0357143
GO:1901135	carbohydrate derivative metabolic process	BP	5	708	54	15836	TR17775_c0_g2,TR2468_c0_g1,TR2946_c0_g1,TR143_c0_g2,TR9241_c0_g2	0.0926812	0.301052	0.00706215
GO:0044391	ribosomal subunit	CC	4	505	54	15836	TR42615_c0_g1,TR20991_c0_g1,TR33502_c1_g3,TR11823_c0_g1	0.0929952	0.301052	0.00792079
GO:0072521	purine-containing compound metabolic process	BP	4	507	54	15836	TR17775_c0_g2,TR2468_c0_g1,TR143_c0_g2,TR9241_c0_g2	0.0940227	0.302669	0.00788955
GO:0022626	cytosolic ribosome	CC	3	325	54	15836	TR20991_c0_g1,TR33502_c1_g3,TR11823_c0_g1	0.0990401	0.317039	0.00923077
GO:0044798	nuclear transcription factor complex	CC	1	31	54	15836	TR159997_c0_g1	0.100566	0.320136	0.0322581
GO:0019693	ribose phosphate metabolic process	BP	4	523	54	15836	TR17775_c0_g2,TR2468_c0_g1,TR143_c0_g2,TR9241_c0_g2	0.102439	0.324296	0.00764818
GO:2001251	negative regulation of chromosome organization	BP	1	32	54	15836	TR159997_c0_g1	0.103639	0.326293	0.03125
GO:0042626	ATPase activity, coupled to transmembrane movement of substances	MF	2	165	54	15836	TR2468_c0_g1,TR17775_c0_g2	0.108773	0.340584	0.0121212
GO:0043244	regulation of protein complex disassembly	BP	1	34	54	15836	TR65448_c0_g1	0.109754	0.341789	0.0294118
GO:0043492	ATPase activity, coupled to movement of substances	MF	2	168	54	15836	TR2468_c0_g1,TR17775_c0_g2	0.112067	0.347104	0.0119048
GO:0003712	transcription coregulator activity	MF	1	38	54	15836	TR159997_c0_g1	0.121862	0.373407	0.0263158
GO:0005667	transcription factor complex	CC	1	38	54	15836	TR159997_c0_g1	0.121862	0.373407	0.0263158
GO:0022625	cytosolic large ribosomal subunit	CC	2	178	54	15836	TR20991_c0_g1,TR33502_c1_g3	0.12323	0.373781	0.011236
GO:0006338	chromatin remodeling	BP	1	39	54	15836	TR159997_c0_g1	0.124864	0.373781	0.025641
GO:0008285	negative regulation of cell proliferation	BP	1	39	54	15836	TR159997_c0_g1	0.124864	0.373781	0.025641
GO:0009507	chloroplast	CC	2	180	54	15836	TR143_c0_g2,TR2468_c0_g1	0.125495	0.373781	0.0111111
GO:0015399	primary active transmembrane transporter activity	MF	2	181	54	15836	TR2468_c0_g1,TR17775_c0_g2	0.126632	0.373781	0.0110497
GO:0015405	P-P-bond-hydrolysis-driven transmembrane transporter activity	MF	2	181	54	15836	TR2468_c0_g1,TR17775_c0_g2	0.126632	0.373781	0.0110497
GO:0042440	pigment metabolic process	BP	1	40	54	15836	TR2946_c0_g1	0.127855	0.373781	0.025
GO:0046148	pigment biosynthetic process	BP	1	40	54	15836	TR2946_c0_g1	0.127855	0.373781	0.025
GO:0003682	chromatin binding	MF	1	40	54	15836	TR159997_c0_g1	0.127855	0.373781	0.025
GO:0043022	ribosome binding	MF	1	41	54	15836	TR65448_c0_g1	0.130837	0.380556	0.0243902
GO:0007569	cell aging	BP	1	42	54	15836	TR159997_c0_g1	0.133808	0.385287	0.0238095
GO:0031497	chromatin assembly	BP	1	42	54	15836	TR159997_c0_g1	0.133808	0.385287	0.0238095
GO:0009117	nucleotide metabolic process	BP	4	582	54	15836	TR17775_c0_g2,TR2468_c0_g1,TR143_c0_g2,TR9241_c0_g2	0.136329	0.389896	0.00687285
GO:0045261	proton-transporting ATP synthase complex, catalytic core F(1)	CC	1	43	54	15836	TR2468_c0_g1	0.13677	0.389896	0.0232558
GO:1901659	glycosyl compound biosynthetic process	BP	1	44	54	15836	TR2946_c0_g1	0.139721	0.396339	0.0227273
GO:0006753	nucleoside phosphate metabolic process	BP	4	589	54	15836	TR17775_c0_g2,TR2468_c0_g1,TR143_c0_g2,TR9241_c0_g2	0.140629	0.396947	0.00679117
GO:0010557	positive regulation of macromolecule biosynthetic process	BP	2	198	54	15836	TR159997_c0_g1,TR65448_c0_g1	0.146311	0.410962	0.010101
GO:0006415	translational termination	BP	1	47	54	15836	TR65448_c0_g1	0.148517	0.411782	0.0212766
GO:0016032	viral process	BP	1	47	54	15836	TR159997_c0_g1	0.148517	0.411782	0.0212766
GO:0043933	protein-containing complex subunit organization	BP	4	602	54	15836	TR20991_c0_g1,TR159997_c0_g1,TR33502_c1_g3,TR65448_c0_g1	0.148759	0.411782	0.00664452
GO:0006261	DNA-dependent DNA replication	BP	1	49	54	15836	TR159997_c0_g1	0.154331	0.421819	0.0204082
GO:0034728	nucleosome organization	BP	1	49	54	15836	TR159997_c0_g1	0.154331	0.421819	0.0204082
GO:0031328	positive regulation of cellular biosynthetic process	BP	2	205	54	15836	TR159997_c0_g1,TR65448_c0_g1	0.154593	0.421819	0.0097561
GO:0006333	chromatin assembly or disassembly	BP	1	50	54	15836	TR159997_c0_g1	0.157224	0.426964	0.02
GO:0009891	positive regulation of biosynthetic process	BP	2	208	54	15836	TR159997_c0_g1,TR65448_c0_g1	0.158171	0.42751	0.00961538
GO:0006730	one-carbon metabolic process	BP	1	51	54	15836	TR639_c1_g1	0.160107	0.427925	0.0196078
GO:0044403	symbiont process	BP	1	51	54	15836	TR159997_c0_g1	0.160107	0.427925	0.0196078
GO:0022618	ribonucleoprotein complex assembly	BP	2	210	54	15836	TR20991_c0_g1,TR33502_c1_g3	0.160565	0.427925	0.00952381
GO:0010628	positive regulation of gene expression	BP	2	217	54	15836	TR159997_c0_g1,TR65448_c0_g1	0.168998	0.446248	0.00921659
GO:0071826	ribonucleoprotein complex subunit organization	BP	2	217	54	15836	TR20991_c0_g1,TR33502_c1_g3	0.168998	0.446248	0.00921659
GO:0046933	proton-transporting ATP synthase activity, rotational mechanism	MF	1	55	54	15836	TR2468_c0_g1	0.171542	0.450889	0.0181818
GO:0044419	interspecies interaction between organisms	BP	1	56	54	15836	TR159997_c0_g1	0.174377	0.454173	0.0178571
GO:1990837	sequence-specific double-stranded DNA binding	MF	1	56	54	15836	TR159997_c0_g1	0.174377	0.454173	0.0178571
GO:0051704	multi-organism process	BP	2	225	54	15836	TR159997_c0_g1,TR35533_c0_g1	0.178728	0.456418	0.00888889
GO:0044445	cytosolic part	CC	3	428	54	15836	TR20991_c0_g1,TR33502_c1_g3,TR11823_c0_g1	0.17894	0.456418	0.00700935
GO:0006754	ATP biosynthetic process	BP	2	226	54	15836	TR2468_c0_g1,TR17775_c0_g2	0.179951	0.456418	0.00884956
GO:0006323	DNA packaging	BP	1	58	54	15836	TR159997_c0_g1	0.180018	0.456418	0.0172414
GO:0007568	aging	BP	1	58	54	15836	TR159997_c0_g1	0.180018	0.456418	0.0172414
GO:0033044	regulation of chromosome organization	BP	1	58	54	15836	TR159997_c0_g1	0.180018	0.456418	0.0172414
GO:0045727	positive regulation of translation	BP	1	59	54	15836	TR65448_c0_g1	0.182825	0.461491	0.0169492
GO:0045333	cellular respiration	BP	2	232	54	15836	TR143_c0_g2,TR9241_c0_g2	0.187314	0.463677	0.00862069
GO:0034250	positive regulation of cellular amide metabolic process	BP	1	61	54	15836	TR65448_c0_g1	0.188409	0.463677	0.0163934
GO:0008483	transaminase activity	MF	1	61	54	15836	TR55629_c0_g1	0.188409	0.463677	0.0163934
GO:0140097	catalytic activity, acting on DNA	MF	1	61	54	15836	TR159997_c0_g1	0.188409	0.463677	0.0163934
GO:0009145	purine nucleoside triphosphate biosynthetic process	BP	2	233	54	15836	TR17775_c0_g2,TR2468_c0_g1	0.188546	0.463677	0.00858369
GO:0009206	purine ribonucleoside triphosphate biosynthetic process	BP	2	233	54	15836	TR17775_c0_g2,TR2468_c0_g1	0.188546	0.463677	0.00858369
GO:0008134	transcription factor binding	MF	1	62	54	15836	TR159997_c0_g1	0.191187	0.468164	0.016129
GO:0006790	sulfur compound metabolic process	BP	2	237	54	15836	TR6811_c0_g1,TR639_c1_g1	0.193484	0.468848	0.00843882
GO:0016769	transferase activity, transferring nitrogenous groups	MF	1	63	54	15836	TR55629_c0_g1	0.193956	0.468848	0.015873
GO:0043021	ribonucleoprotein complex binding	MF	1	63	54	15836	TR65448_c0_g1	0.193956	0.468848	0.015873
GO:0009611	response to wounding	BP	1	64	54	15836	TR99728_c0_g1	0.196716	0.468848	0.015625
GO:0019904	protein domain specific binding	MF	1	64	54	15836	TR1673_c1_g1	0.196716	0.468848	0.015625
GO:0006342	chromatin silencing	BP	1	65	54	15836	TR159997_c0_g1	0.199466	0.468848	0.0153846
GO:0010639	negative regulation of organelle organization	BP	1	65	54	15836	TR159997_c0_g1	0.199466	0.468848	0.0153846
GO:0045814	negative regulation of gene expression, epigenetic	BP	1	65	54	15836	TR159997_c0_g1	0.199466	0.468848	0.0153846
GO:0055086	nucleobase-containing small molecule metabolic process	BP	4	678	54	15836	TR17775_c0_g2,TR2468_c0_g1,TR143_c0_g2,TR9241_c0_g2	0.199684	0.468848	0.00589971
GO:0000027	ribosomal large subunit assembly	BP	1	66	54	15836	TR20991_c0_g1	0.202207	0.468848	0.0151515
GO:0006260	DNA replication	BP	1	66	54	15836	TR159997_c0_g1	0.202207	0.468848	0.0151515
GO:0036442	proton-exporting ATPase activity	MF	1	66	54	15836	TR17775_c0_g2	0.202207	0.468848	0.0151515
GO:0009201	ribonucleoside triphosphate biosynthetic process	BP	2	245	54	15836	TR17775_c0_g2,TR2468_c0_g1	0.203411	0.468848	0.00816327
GO:0016740	transferase activity	MF	8	1667	54	15836	TR6811_c0_g1,TR123983_c0_g1,TR639_c1_g1,TR35533_c0_g1,TR2946_c0_g1,TR55629_c0_g1,TR12547_c0_g1,TR11503_c0_g1	0.203678	0.468848	0.00479904
GO:0009142	nucleoside triphosphate biosynthetic process	BP	2	246	54	15836	TR17775_c0_g2,TR2468_c0_g1	0.204656	0.468848	0.00813008
GO:1901137	carbohydrate derivative biosynthetic process	BP	3	458	54	15836	TR17775_c0_g2,TR2468_c0_g1,TR2946_c0_g1	0.204921	0.468848	0.00655022
GO:0008144	drug binding	MF	7	1417	54	15836	TR156193_c0_g1,TR639_c1_g1,TR17775_c0_g2,TR52454_c2_g1,TR2468_c0_g1,TR2520_c8_g1,TR55629_c0_g1	0.205377	0.468848	0.00494001
GO:0019637	organophosphate metabolic process	BP	4	688	54	15836	TR17775_c0_g2,TR2468_c0_g1,TR143_c0_g2,TR9241_c0_g2	0.206763	0.470126	0.00581395
GO:0043624	cellular protein complex disassembly	BP	1	68	54	15836	TR65448_c0_g1	0.207662	0.470126	0.0147059
GO:0015934	large ribosomal subunit	CC	2	249	54	15836	TR20991_c0_g1,TR33502_c1_g3	0.208398	0.470126	0.00803213
GO:0005768	endosome	CC	1	69	54	15836	TR35533_c0_g1	0.210375	0.472725	0.0144928
GO:0006575	cellular modified amino acid metabolic process	BP	1	70	54	15836	TR6811_c0_g1	0.213079	0.473234	0.0142857
GO:0016458	gene silencing	BP	1	70	54	15836	TR159997_c0_g1	0.213079	0.473234	0.0142857
GO:0080135	regulation of cellular response to stress	BP	1	70	54	15836	TR159997_c0_g1	0.213079	0.473234	0.0142857
GO:0015318	inorganic molecular entity transmembrane transporter activity	MF	3	470	54	15836	TR2468_c0_g1,TR84829_c0_g1,TR17775_c0_g2	0.215559	0.476893	0.00638298
GO:0015935	small ribosomal subunit	CC	2	256	54	15836	TR11823_c0_g1,TR42615_c0_g1	0.217157	0.47858	0.0078125
GO:0042623	ATPase activity, coupled	MF	2	258	54	15836	TR2468_c0_g1,TR17775_c0_g2	0.219666	0.482109	0.00775194
GO:0033178	proton-transporting two-sector ATPase complex, catalytic domain	CC	1	73	54	15836	TR2468_c0_g1	0.221138	0.482109	0.0136986
GO:1902600	proton transmembrane transport	BP	2	260	54	15836	TR2468_c0_g1,TR17775_c0_g2	0.222178	0.482109	0.00769231
GO:0050896	response to stimulus	BP	6	1199	54	15836	TR99728_c0_g1,TR159997_c0_g1,TR35533_c0_g1,TR44_c2_g1,TR3180_c6_g1,TR5959_c1_g1	0.222653	0.482109	0.00500417
GO:0022804	active transmembrane transporter activity	MF	2	261	54	15836	TR2468_c0_g1,TR17775_c0_g2	0.223435	0.482109	0.00766284
GO:0040029	regulation of gene expression, epigenetic	BP	1	74	54	15836	TR159997_c0_g1	0.223806	0.482109	0.0135135
GO:0031984	organelle subcompartment	CC	2	262	54	15836	TR143_c0_g2,TR2468_c0_g1	0.224692	0.482205	0.00763359
GO:0000981	DNA-binding transcription factor activity, RNA polymerase II-specific	MF	1	75	54	15836	TR159997_c0_g1	0.226465	0.484197	0.0133333
GO:0015171	amino acid transmembrane transporter activity	MF	1	76	54	15836	TR84829_c0_g1	0.229116	0.488042	0.0131579
GO:0051094	positive regulation of developmental process	BP	1	77	54	15836	TR159997_c0_g1	0.231757	0.489182	0.012987
GO:0015980	energy derivation by oxidation of organic compounds	BP	2	269	54	15836	TR143_c0_g2,TR9241_c0_g2	0.233511	0.489182	0.00743494
GO:0042127	regulation of cell proliferation	BP	1	78	54	15836	TR159997_c0_g1	0.23439	0.489182	0.0128205
GO:0071103	DNA conformation change	BP	1	78	54	15836	TR159997_c0_g1	0.23439	0.489182	0.0128205
GO:0015075	ion transmembrane transporter activity	MF	3	491	54	15836	TR2468_c0_g1,TR84829_c0_g1,TR17775_c0_g2	0.234458	0.489182	0.00610998
GO:0015078	proton transmembrane transporter activity	MF	2	270	54	15836	TR2468_c0_g1,TR17775_c0_g2	0.234773	0.489182	0.00740741
GO:0046912	transferase activity, transferring acyl groups, acyl groups converted into alkyl on transfer	MF	1	79	54	15836	TR123983_c0_g1	0.237013	0.49206	0.0126582
GO:0003690	double-stranded DNA binding	MF	1	80	54	15836	TR159997_c0_g1	0.239628	0.495692	0.0125
GO:1901657	glycosyl compound metabolic process	BP	1	83	54	15836	TR2946_c0_g1	0.24742	0.509969	0.0120482
GO:0009127	purine nucleoside monophosphate biosynthetic process	BP	2	282	54	15836	TR17775_c0_g2,TR2468_c0_g1	0.249947	0.511498	0.0070922
GO:0009168	purine ribonucleoside monophosphate biosynthetic process	BP	2	282	54	15836	TR17775_c0_g2,TR2468_c0_g1	0.249947	0.511498	0.0070922
GO:0015077	monovalent inorganic cation transmembrane transporter activity	MF	2	283	54	15836	TR2468_c0_g1,TR17775_c0_g2	0.251213	0.512261	0.00706714
GO:0015672	monovalent inorganic cation transport	BP	2	289	54	15836	TR17775_c0_g2,TR2468_c0_g1	0.258817	0.525544	0.00692042
GO:0009067	aspartate family amino acid biosynthetic process	BP	1	88	54	15836	TR123983_c0_g1	0.260232	0.525544	0.0113636
GO:0015985	energy coupled proton transport, down electrochemical gradient	BP	1	89	54	15836	TR2468_c0_g1	0.262769	0.525544	0.011236
GO:0015986	ATP synthesis coupled proton transport	BP	1	89	54	15836	TR2468_c0_g1	0.262769	0.525544	0.011236
GO:0009156	ribonucleoside monophosphate biosynthetic process	BP	2	294	54	15836	TR17775_c0_g2,TR2468_c0_g1	0.265158	0.525544	0.00680272
GO:0009124	nucleoside monophosphate biosynthetic process	BP	2	295	54	15836	TR17775_c0_g2,TR2468_c0_g1	0.266426	0.525544	0.00677966
GO:0004497	monooxygenase activity	MF	1	91	54	15836	TR49662_c0_g1	0.267816	0.525544	0.010989
GO:0005924	cell-substrate adherens junction	CC	1	91	54	15836	TR159997_c0_g1	0.267816	0.525544	0.010989
GO:0005925	focal adhesion	CC	1	91	54	15836	TR159997_c0_g1	0.267816	0.525544	0.010989
GO:0030055	cell-substrate junction	CC	1	91	54	15836	TR159997_c0_g1	0.267816	0.525544	0.010989
GO:0045259	proton-transporting ATP synthase complex	CC	1	91	54	15836	TR2468_c0_g1	0.267816	0.525544	0.010989
GO:0005342	organic acid transmembrane transporter activity	MF	1	93	54	15836	TR84829_c0_g1	0.27283	0.528196	0.0107527
GO:0046943	carboxylic acid transmembrane transporter activity	MF	1	93	54	15836	TR84829_c0_g1	0.27283	0.528196	0.0107527
GO:0005524	ATP binding	MF	6	1292	54	15836	TR156193_c0_g1,TR639_c1_g1,TR17775_c0_g2,TR52454_c2_g1,TR2468_c0_g1,TR2520_c8_g1	0.276366	0.528196	0.00464396
GO:0008283	cell proliferation	BP	1	95	54	15836	TR159997_c0_g1	0.27781	0.528196	0.0105263
GO:0044769	ATPase activity, coupled to transmembrane movement of ions, rotational mechanism	MF	1	95	54	15836	TR2468_c0_g1	0.27781	0.528196	0.0105263
GO:0015988	energy coupled proton transmembrane transport, against electrochemical gradient	BP	1	96	54	15836	TR2468_c0_g1	0.280288	0.528196	0.0104167
GO:0015991	ATP hydrolysis coupled proton transport	BP	1	96	54	15836	TR2468_c0_g1	0.280288	0.528196	0.0104167
GO:0071824	protein-DNA complex subunit organization	BP	1	96	54	15836	TR159997_c0_g1	0.280288	0.528196	0.0104167
GO:0099131	ATP hydrolysis coupled ion transmembrane transport	BP	1	96	54	15836	TR2468_c0_g1	0.280288	0.528196	0.0104167
GO:0099132	ATP hydrolysis coupled cation transmembrane transport	BP	1	96	54	15836	TR2468_c0_g1	0.280288	0.528196	0.0104167
GO:0090662	ATP hydrolysis coupled transmembrane transport	BP	1	97	54	15836	TR2468_c0_g1	0.282757	0.528196	0.0103093
GO:0051173	positive regulation of nitrogen compound metabolic process	BP	2	308	54	15836	TR159997_c0_g1,TR65448_c0_g1	0.282915	0.528196	0.00649351
GO:0005102	signaling receptor binding	MF	1	98	54	15836	TR159997_c0_g1	0.285218	0.528196	0.0102041
GO:0008150	biological_process	BP	39	10713	54	15836	TR20991_c0_g1,TR219280_c0_g1,TR99728_c0_g1,TR159997_c0_g1,TR35533_c0_g1,TR499_c0_g2,TR49662_c0_g1,TR3180_c6_g1,TR5959_c1_g1,TR6811_c0_g1,TR60505_c0_g1,TR46620_c0_g3,TR11823_c0_g1,TR169525_c0_g2,TR23303_c0_g1,TR31443_c0_g4,TR42615_c0_g1,TR70654_c0_g1,TR77467_c0_g2,TR69912_c0_g2,TR77710_c0_g1,TR20992_c0_g1,TR28841_c0_g1,TR33502_c1_g3,TR77589_c1_g4,TR65448_c0_g1,TR7729_c0_g1,TR639_c1_g1,TR17775_c0_g…	0.287214	0.528196	0.00364044
GO:0005912	adherens junction	CC	1	99	54	15836	TR159997_c0_g1	0.28767	0.528196	0.010101
GO:0070161	anchoring junction	CC	1	99	54	15836	TR159997_c0_g1	0.28767	0.528196	0.010101
GO:0043565	sequence-specific DNA binding	MF	1	100	54	15836	TR159997_c0_g1	0.290115	0.528196	0.01
GO:0032559	adenyl ribonucleotide binding	MF	6	1316	54	15836	TR156193_c0_g1,TR639_c1_g1,TR17775_c0_g2,TR52454_c2_g1,TR2468_c0_g1,TR2520_c8_g1	0.290761	0.528196	0.00455927
GO:0008514	organic anion transmembrane transporter activity	MF	1	101	54	15836	TR84829_c0_g1	0.292551	0.528196	0.00990099
GO:0016835	carbon-oxygen lyase activity	MF	1	101	54	15836	TR159997_c0_g1	0.292551	0.528196	0.00990099
GO:0030554	adenyl nucleotide binding	MF	6	1319	54	15836	TR156193_c0_g1,TR639_c1_g1,TR17775_c0_g2,TR52454_c2_g1,TR2468_c0_g1,TR2520_c8_g1	0.292573	0.528196	0.0045489
GO:0098662	inorganic cation transmembrane transport	BP	2	317	54	15836	TR17775_c0_g2,TR2468_c0_g1	0.29432	0.528196	0.00630915
GO:0016829	lyase activity	MF	2	317	54	15836	TR99728_c0_g1,TR159997_c0_g1	0.29432	0.528196	0.00630915
GO:0009066	aspartate family amino acid metabolic process	BP	1	102	54	15836	TR123983_c0_g1	0.294979	0.528196	0.00980392
GO:0042255	ribosome assembly	BP	1	102	54	15836	TR20991_c0_g1	0.294979	0.528196	0.00980392
GO:0051129	negative regulation of cellular component organization	BP	1	102	54	15836	TR159997_c0_g1	0.294979	0.528196	0.00980392
GO:0030170	pyridoxal phosphate binding	MF	1	102	54	15836	TR55629_c0_g1	0.294979	0.528196	0.00980392
GO:0070279	vitamin B6 binding	MF	1	102	54	15836	TR55629_c0_g1	0.294979	0.528196	0.00980392
GO:0010604	positive regulation of macromolecule metabolic process	BP	2	319	54	15836	TR159997_c0_g1,TR65448_c0_g1	0.296852	0.529894	0.00626959
GO:0005488	binding	MF	24	6341	54	15836	TR156723_c0_g2,TR35533_c0_g1,TR99728_c0_g1,TR24295_c0_g1,TR3263_c3_g1,TR22233_c0_g1,TR159997_c0_g1,TR42615_c0_g1,TR33502_c1_g3,TR65448_c0_g1,TR639_c1_g1,TR77467_c0_g2,TR17775_c0_g2,TR2946_c0_g1,TR156193_c0_g1,TR52454_c2_g1,TR2468_c0_g1,TR2520_c8_g1,TR1673_c1_g1,TR3180_c6_g1,TR55629_c0_g1,TR143_c0_g2,TR11823_c0_g1,TR70035_c0_g2	0.29859	0.531341	0.00378489
GO:0006865	amino acid transport	BP	1	105	54	15836	TR84829_c0_g1	0.302213	0.536124	0.00952381
GO:0022890	inorganic cation transmembrane transporter activity	MF	2	327	54	15836	TR2468_c0_g1,TR17775_c0_g2	0.306968	0.542878	0.00611621
GO:0098660	inorganic ion transmembrane transport	BP	2	329	54	15836	TR17775_c0_g2,TR2468_c0_g1	0.309493	0.54566	0.00607903
GO:0080134	regulation of response to stress	BP	1	109	54	15836	TR159997_c0_g1	0.311746	0.547946	0.00917431
GO:0031325	positive regulation of cellular metabolic process	BP	2	333	54	15836	TR159997_c0_g1,TR65448_c0_g1	0.314539	0.551165	0.00600601
GO:0009152	purine ribonucleotide biosynthetic process	BP	2	335	54	15836	TR17775_c0_g2,TR2468_c0_g1	0.317059	0.553887	0.00597015
GO:0048584	positive regulation of response to stimulus	BP	1	113	54	15836	TR159997_c0_g1	0.321151	0.557635	0.00884956
GO:0003746	translation elongation factor activity	MF	1	113	54	15836	TR65448_c0_g1	0.321151	0.557635	0.00884956
GO:0045944	positive regulation of transcription by RNA polymerase II	BP	1	116	54	15836	TR159997_c0_g1	0.328122	0.566307	0.00862069
GO:0008168	methyltransferase activity	MF	1	116	54	15836	TR2946_c0_g1	0.328122	0.566307	0.00862069
GO:0006164	purine nucleotide biosynthetic process	BP	2	345	54	15836	TR17775_c0_g2,TR2468_c0_g1	0.329632	0.567204	0.0057971
GO:0070887	cellular response to chemical stimulus	BP	2	347	54	15836	TR3180_c6_g1,TR5959_c1_g1	0.33214	0.567953	0.00576369
GO:0098655	cation transmembrane transport	BP	2	347	54	15836	TR17775_c0_g2,TR2468_c0_g1	0.33214	0.567953	0.00576369
GO:0009893	positive regulation of metabolic process	BP	2	348	54	15836	TR159997_c0_g1,TR65448_c0_g1	0.333393	0.567953	0.00574713
GO:0009260	ribonucleotide biosynthetic process	BP	2	349	54	15836	TR17775_c0_g2,TR2468_c0_g1	0.334645	0.567953	0.00573066
GO:0006281	DNA repair	BP	1	119	54	15836	TR159997_c0_g1	0.335023	0.567953	0.00840336
GO:0046390	ribose phosphate biosynthetic process	BP	2	353	54	15836	TR17775_c0_g2,TR2468_c0_g1	0.339648	0.574096	0.00566572
GO:0042273	ribosomal large subunit biogenesis	BP	1	123	54	15836	TR20991_c0_g1	0.344115	0.578235	0.00813008
GO:0030054	cell junction	CC	1	123	54	15836	TR159997_c0_g1	0.344115	0.578235	0.00813008
GO:0072522	purine-containing compound biosynthetic process	BP	2	359	54	15836	TR17775_c0_g2,TR2468_c0_g1	0.347134	0.581601	0.00557103
GO:0051128	regulation of cellular component organization	BP	2	361	54	15836	TR159997_c0_g1,TR65448_c0_g1	0.349623	0.584064	0.00554017
GO:0006725	cellular aromatic compound metabolic process	BP	9	2237	54	15836	TR159997_c0_g1,TR60505_c0_g1,TR46620_c0_g3,TR17775_c0_g2,TR2468_c0_g1,TR11503_c0_g1,TR143_c0_g2,TR9241_c0_g2,TR99728_c0_g1	0.351205	0.585002	0.00402325
GO:0008324	cation transmembrane transporter activity	MF	2	364	54	15836	TR2468_c0_g1,TR17775_c0_g2	0.353352	0.585036	0.00549451
GO:0003723	RNA binding	MF	4	883	54	15836	TR65448_c0_g1,TR11823_c0_g1,TR42615_c0_g1,TR33502_c1_g3	0.355222	0.585036	0.00453001
GO:0006979	response to oxidative stress	BP	1	128	54	15836	TR3180_c6_g1	0.35531	0.585036	0.0078125
GO:0003700	DNA-binding transcription factor activity	MF	1	128	54	15836	TR159997_c0_g1	0.35531	0.585036	0.0078125
GO:0004674	protein serine/threonine kinase activity	MF	1	129	54	15836	TR35533_c0_g1	0.357526	0.586998	0.00775194
GO:0022607	cellular component assembly	BP	3	625	54	15836	TR20991_c0_g1,TR33502_c1_g3,TR159997_c0_g1	0.35952	0.588585	0.0048
GO:0000785	chromatin	CC	1	131	54	15836	TR159997_c0_g1	0.361936	0.590853	0.00763359
GO:0008509	anion transmembrane transporter activity	MF	1	132	54	15836	TR84829_c0_g1	0.36413	0.592746	0.00757576
GO:0045893	positive regulation of transcription, DNA-templated	BP	1	137	54	15836	TR159997_c0_g1	0.374989	0.605264	0.00729927
GO:1902680	positive regulation of RNA biosynthetic process	BP	1	137	54	15836	TR159997_c0_g1	0.374989	0.605264	0.00729927
GO:1903508	positive regulation of nucleic acid-templated transcription	BP	1	137	54	15836	TR159997_c0_g1	0.374989	0.605264	0.00729927
GO:1901360	organic cyclic compound metabolic process	BP	9	2289	54	15836	TR159997_c0_g1,TR60505_c0_g1,TR46620_c0_g3,TR17775_c0_g2,TR2468_c0_g1,TR11503_c0_g1,TR143_c0_g2,TR9241_c0_g2,TR99728_c0_g1	0.37773	0.607062	0.00393185
GO:0015849	organic acid transport	BP	1	139	54	15836	TR84829_c0_g1	0.379282	0.607062	0.00719424
GO:0046942	carboxylic acid transport	BP	1	139	54	15836	TR84829_c0_g1	0.379282	0.607062	0.00719424
GO:0022627	cytosolic small ribosomal subunit	CC	1	141	54	15836	TR11823_c0_g1	0.383545	0.612176	0.0070922
GO:0016741	transferase activity, transferring one-carbon groups	MF	1	144	54	15836	TR2946_c0_g1	0.389887	0.620569	0.00694444
GO:0003743	translation initiation factor activity	MF	1	145	54	15836	TR65448_c0_g1	0.391986	0.622183	0.00689655
GO:0009165	nucleotide biosynthetic process	BP	2	398	54	15836	TR17775_c0_g2,TR2468_c0_g1	0.395072	0.622494	0.00502513
GO:0051254	positive regulation of RNA metabolic process	BP	1	147	54	15836	TR159997_c0_g1	0.396164	0.622494	0.00680272
GO:0019843	rRNA binding	MF	1	147	54	15836	TR11823_c0_g1	0.396164	0.622494	0.00680272
GO:0006811	ion transport	BP	3	666	54	15836	TR84829_c0_g1,TR17775_c0_g2,TR2468_c0_g1	0.3979	0.622494	0.0045045
GO:0006397	mRNA processing	BP	1	148	54	15836	TR46620_c0_g3	0.398242	0.622494	0.00675676
GO:1901293	nucleoside phosphate biosynthetic process	BP	2	401	54	15836	TR17775_c0_g2,TR2468_c0_g1	0.3987	0.622494	0.00498753
GO:0019842	vitamin binding	MF	1	149	54	15836	TR55629_c0_g1	0.400314	0.623174	0.00671141
GO:0003676	nucleic acid binding	MF	6	1494	54	15836	TR22233_c0_g1,TR159997_c0_g1,TR42615_c0_g1,TR33502_c1_g3,TR65448_c0_g1,TR11823_c0_g1	0.401311	0.623174	0.00401606
GO:0051716	cellular response to stimulus	BP	4	946	54	15836	TR35533_c0_g1,TR159997_c0_g1,TR3180_c6_g1,TR5959_c1_g1	0.404791	0.626878	0.00422833
GO:0044281	small molecule metabolic process	BP	7	1785	54	15836	TR639_c1_g1,TR17775_c0_g2,TR2468_c0_g1,TR99728_c0_g1,TR123983_c0_g1,TR143_c0_g2,TR9241_c0_g2	0.408293	0.630597	0.00392157
GO:0044877	protein-containing complex binding	MF	1	154	54	15836	TR65448_c0_g1	0.410566	0.632404	0.00649351
GO:0006974	cellular response to DNA damage stimulus	BP	1	155	54	15836	TR159997_c0_g1	0.412595	0.632927	0.00645161
GO:0003677	DNA binding	MF	2	413	54	15836	TR159997_c0_g1,TR22233_c0_g1	0.413115	0.632927	0.00484262
GO:0045892	negative regulation of transcription, DNA-templated	BP	1	157	54	15836	TR159997_c0_g1	0.416634	0.632936	0.00636943
GO:0140110	transcription regulator activity	MF	1	157	54	15836	TR159997_c0_g1	0.416634	0.632936	0.00636943
GO:0006139	nucleobase-containing compound metabolic process	BP	8	2084	54	15836	TR159997_c0_g1,TR60505_c0_g1,TR46620_c0_g3,TR17775_c0_g2,TR2468_c0_g1,TR11503_c0_g1,TR143_c0_g2,TR9241_c0_g2	0.418034	0.632936	0.00383877
GO:1902679	negative regulation of RNA biosynthetic process	BP	1	158	54	15836	TR159997_c0_g1	0.418643	0.632936	0.00632911
GO:1903507	negative regulation of nucleic acid-templated transcription	BP	1	158	54	15836	TR159997_c0_g1	0.418643	0.632936	0.00632911
GO:0050793	regulation of developmental process	BP	1	159	54	15836	TR159997_c0_g1	0.420646	0.63429	0.00628931
GO:0070925	organelle assembly	BP	1	160	54	15836	TR20991_c0_g1	0.422641	0.635626	0.00625
GO:0044272	sulfur compound biosynthetic process	BP	1	162	54	15836	TR639_c1_g1	0.426612	0.637872	0.00617284
GO:0045935	positive regulation of nucleobase-containing compound metabolic process	BP	1	162	54	15836	TR159997_c0_g1	0.426612	0.637872	0.00617284
GO:0015711	organic anion transport	BP	1	163	54	15836	TR84829_c0_g1	0.428588	0.637872	0.00613497
GO:0020037	heme binding	MF	1	163	54	15836	TR3180_c6_g1	0.428588	0.637872	0.00613497
GO:1901363	heterocyclic compound binding	MF	15	4110	54	15836	TR156723_c0_g2,TR22233_c0_g1,TR159997_c0_g1,TR42615_c0_g1,TR33502_c1_g3,TR65448_c0_g1,TR156193_c0_g1,TR639_c1_g1,TR17775_c0_g2,TR52454_c2_g1,TR2468_c0_g1,TR2520_c8_g1,TR3180_c6_g1,TR55629_c0_g1,TR11823_c0_g1	0.430549	0.639132	0.00364964
GO:0006417	regulation of translation	BP	1	165	54	15836	TR65448_c0_g1	0.432519	0.639564	0.00606061
GO:0097159	organic cyclic compound binding	MF	15	4116	54	15836	TR156723_c0_g2,TR22233_c0_g1,TR159997_c0_g1,TR42615_c0_g1,TR33502_c1_g3,TR65448_c0_g1,TR156193_c0_g1,TR639_c1_g1,TR17775_c0_g2,TR52454_c2_g1,TR2468_c0_g1,TR2520_c8_g1,TR3180_c6_g1,TR55629_c0_g1,TR11823_c0_g1	0.433073	0.639564	0.00364431
GO:0005575	cellular_component	CC	35	9944	54	15836	TR35533_c0_g1,TR48963_c0_g1,TR84829_c0_g1,TR169525_c0_g2,TR23303_c0_g1,TR31443_c0_g4,TR70654_c0_g1,TR77467_c0_g2,TR69912_c0_g2,TR7729_c0_g1,TR77710_c0_g1,TR20992_c0_g1,TR28841_c0_g1,TR77589_c1_g4,TR42615_c0_g1,TR159997_c0_g1,TR43707_c0_g1,TR143_c0_g2,TR17775_c0_g2,TR9241_c0_g2,TR46620_c0_g3,TR9894_c0_g1,TR60505_c0_g1,TR1106_c3_g1,TR11823_c0_g1,TR156723_c0_g2,TR123983_c0_g1,TR639_c1_g1,TR10703_c2_…	0.438491	0.645151	0.00351971
GO:0051186	cofactor metabolic process	BP	2	435	54	15836	TR6811_c0_g1,TR639_c1_g1	0.439108	0.645151	0.0045977
GO:0051253	negative regulation of RNA metabolic process	BP	1	169	54	15836	TR159997_c0_g1	0.440301	0.645249	0.00591716
GO:0006091	generation of precursor metabolites and energy	BP	2	438	54	15836	TR143_c0_g2,TR9241_c0_g2	0.442607	0.645484	0.00456621
GO:0002181	cytoplasmic translation	BP	1	172	54	15836	TR20991_c0_g1	0.446069	0.645484	0.00581395
GO:0034248	regulation of cellular amide metabolic process	BP	1	172	54	15836	TR65448_c0_g1	0.446069	0.645484	0.00581395
GO:0016469	proton-transporting two-sector ATPase complex	CC	1	172	54	15836	TR2468_c0_g1	0.446069	0.645484	0.00581395
GO:0006812	cation transport	BP	2	441	54	15836	TR17775_c0_g2,TR2468_c0_g1	0.446094	0.645484	0.00453515
GO:0032270	positive regulation of cellular protein metabolic process	BP	1	173	54	15836	TR65448_c0_g1	0.447978	0.645547	0.00578035
GO:0005215	transporter activity	MF	4	1002	54	15836	TR2468_c0_g1,TR84829_c0_g1,TR17775_c0_g2,TR43707_c0_g1	0.448391	0.645547	0.00399202
GO:0034622	cellular protein-containing complex assembly	BP	2	444	54	15836	TR20991_c0_g1,TR33502_c1_g3	0.449569	0.645622	0.0045045
GO:0010608	posttranscriptional regulation of gene expression	BP	1	176	54	15836	TR65448_c0_g1	0.453669	0.64988	0.00568182
GO:0006396	RNA processing	BP	2	451	54	15836	TR46620_c0_g3,TR60505_c0_g1	0.457632	0.653923	0.00443459
GO:0006325	chromatin organization	BP	1	181	54	15836	TR159997_c0_g1	0.463024	0.658345	0.00552486
GO:0051247	positive regulation of protein metabolic process	BP	1	181	54	15836	TR65448_c0_g1	0.463024	0.658345	0.00552486
GO:0045934	negative regulation of nucleobase-containing compound metabolic process	BP	1	182	54	15836	TR159997_c0_g1	0.464877	0.659342	0.00549451
GO:0051130	positive regulation of cellular component organization	BP	1	184	54	15836	TR65448_c0_g1	0.468562	0.661296	0.00543478
GO:2000113	negative regulation of cellular macromolecule biosynthetic process	BP	1	184	54	15836	TR159997_c0_g1	0.468562	0.661296	0.00543478
GO:0016887	ATPase activity	MF	2	463	54	15836	TR2468_c0_g1,TR17775_c0_g2	0.471302	0.663528	0.00431965
GO:0010558	negative regulation of macromolecule biosynthetic process	BP	1	187	54	15836	TR159997_c0_g1	0.474044	0.665753	0.00534759
GO:0046872	metal ion binding	MF	6	1615	54	15836	TR24295_c0_g1,TR3263_c3_g1,TR639_c1_g1,TR77467_c0_g2,TR17775_c0_g2,TR2946_c0_g1	0.477058	0.668121	0.00371517
GO:0090407	organophosphate biosynthetic process	BP	2	469	54	15836	TR17775_c0_g2,TR2468_c0_g1	0.478062	0.668121	0.00426439
GO:0016798	hydrolase activity, acting on glycosyl bonds	MF	1	191	54	15836	TR499_c0_g2	0.481267	0.670964	0.0052356
GO:0034220	ion transmembrane transport	BP	2	474	54	15836	TR17775_c0_g2,TR2468_c0_g1	0.483657	0.671049	0.00421941
GO:0031327	negative regulation of cellular biosynthetic process	BP	1	193	54	15836	TR159997_c0_g1	0.484842	0.671049	0.00518135
GO:0033043	regulation of organelle organization	BP	1	193	54	15836	TR159997_c0_g1	0.484842	0.671049	0.00518135
GO:0046906	tetrapyrrole binding	MF	1	194	54	15836	TR3180_c6_g1	0.48662	0.671828	0.00515464
GO:0022857	transmembrane transporter activity	MF	3	765	54	15836	TR2468_c0_g1,TR84829_c0_g1,TR17775_c0_g2	0.48775	0.671828	0.00392157
GO:0009890	negative regulation of biosynthetic process	BP	1	196	54	15836	TR159997_c0_g1	0.490159	0.673528	0.00510204
GO:0005739	mitochondrion	CC	4	1061	54	15836	TR43707_c0_g1,TR46620_c0_g3,TR9241_c0_g2,TR9894_c0_g1	0.493336	0.673754	0.00377003
GO:0043169	cation binding	MF	6	1642	54	15836	TR24295_c0_g1,TR3263_c3_g1,TR639_c1_g1,TR77467_c0_g2,TR17775_c0_g2,TR2946_c0_g1	0.4937	0.673754	0.00365408
GO:0065003	protein-containing complex assembly	BP	2	484	54	15836	TR20991_c0_g1,TR33502_c1_g3	0.494739	0.673754	0.00413223
GO:0042221	response to chemical	BP	2	486	54	15836	TR3180_c6_g1,TR5959_c1_g1	0.496938	0.673754	0.00411523
GO:0006413	translational initiation	BP	1	200	54	15836	TR65448_c0_g1	0.497164	0.673754	0.005
GO:0035639	purine ribonucleoside triphosphate binding	MF	6	1648	54	15836	TR156193_c0_g1,TR639_c1_g1,TR17775_c0_g2,TR52454_c2_g1,TR2468_c0_g1,TR2520_c8_g1	0.497378	0.673754	0.00364078
GO:0046483	heterocycle metabolic process	BP	8	2236	54	15836	TR159997_c0_g1,TR60505_c0_g1,TR46620_c0_g3,TR17775_c0_g2,TR2468_c0_g1,TR11503_c0_g1,TR143_c0_g2,TR9241_c0_g2	0.500561	0.676465	0.00357782
GO:0005654	nucleoplasm	CC	1	205	54	15836	TR159997_c0_g1	0.505789	0.681922	0.00487805
GO:0016071	mRNA metabolic process	BP	1	208	54	15836	TR46620_c0_g3	0.510893	0.685933	0.00480769
GO:0032555	purine ribonucleotide binding	MF	6	1672	54	15836	TR156193_c0_g1,TR639_c1_g1,TR17775_c0_g2,TR52454_c2_g1,TR2468_c0_g1,TR2520_c8_g1	0.512012	0.685933	0.00358852
GO:0048522	positive regulation of cellular process	BP	2	501	54	15836	TR159997_c0_g1,TR65448_c0_g1	0.513243	0.685933	0.00399202
GO:0044427	chromosomal part	CC	1	210	54	15836	TR159997_c0_g1	0.514268	0.685933	0.0047619
GO:0017076	purine nucleotide binding	MF	6	1677	54	15836	TR156193_c0_g1,TR639_c1_g1,TR17775_c0_g2,TR52454_c2_g1,TR2468_c0_g1,TR2520_c8_g1	0.515044	0.685933	0.00357782
GO:0051169	nuclear transport	BP	1	211	54	15836	TR159997_c0_g1	0.515946	0.685933	0.00473934
GO:0005515	protein binding	MF	4	1096	54	15836	TR159997_c0_g1,TR1673_c1_g1,TR35533_c0_g1,TR99728_c0_g1	0.519337	0.688843	0.00364964
GO:0031981	nuclear lumen	CC	2	514	54	15836	TR159997_c0_g1,TR11823_c0_g1	0.527101	0.693301	0.00389105
GO:0016746	transferase activity, transferring acyl groups	MF	1	218	54	15836	TR123983_c0_g1	0.527538	0.693301	0.00458716
GO:0031410	cytoplasmic vesicle	CC	1	218	54	15836	TR35533_c0_g1	0.527538	0.693301	0.00458716
GO:0097708	intracellular vesicle	CC	1	218	54	15836	TR35533_c0_g1	0.527538	0.693301	0.00458716
GO:0005730	nucleolus	CC	1	222	54	15836	TR11823_c0_g1	0.534039	0.700239	0.0045045
GO:0004672	protein kinase activity	MF	1	223	54	15836	TR35533_c0_g1	0.53565	0.700748	0.0044843
GO:0048518	positive regulation of biological process	BP	2	528	54	15836	TR159997_c0_g1,TR65448_c0_g1	0.541734	0.707092	0.00378788
GO:0006820	anion transport	BP	1	228	54	15836	TR84829_c0_g1	0.543626	0.70795	0.00438596
GO:0019899	enzyme binding	MF	1	233	54	15836	TR159997_c0_g1	0.551468	0.714941	0.00429185
GO:0032553	ribonucleotide binding	MF	6	1738	54	15836	TR156193_c0_g1,TR639_c1_g1,TR17775_c0_g2,TR52454_c2_g1,TR2468_c0_g1,TR2520_c8_g1	0.55149	0.714941	0.00345224
GO:0005694	chromosome	CC	1	235	54	15836	TR159997_c0_g1	0.554567	0.717307	0.00425532
GO:0009108	coenzyme biosynthetic process	BP	1	237	54	15836	TR639_c1_g1	0.557645	0.719664	0.00421941
GO:0006259	DNA metabolic process	BP	1	238	54	15836	TR159997_c0_g1	0.559177	0.720018	0.00420168
GO:0010629	negative regulation of gene expression	BP	1	243	54	15836	TR159997_c0_g1	0.566755	0.728141	0.00411523
GO:0051276	chromosome organization	BP	1	245	54	15836	TR159997_c0_g1	0.569751	0.730352	0.00408163
GO:0022613	ribonucleoprotein complex biogenesis	BP	2	560	54	15836	TR20991_c0_g1,TR33502_c1_g3	0.574029	0.734193	0.00357143
GO:1901607	alpha-amino acid biosynthetic process	BP	1	249	54	15836	TR123983_c0_g1	0.575682	0.734667	0.00401606
GO:0048583	regulation of response to stimulus	BP	1	250	54	15836	TR159997_c0_g1	0.577152	0.734906	0.004
GO:0097367	carbohydrate derivative binding	MF	6	1786	54	15836	TR156193_c0_g1,TR639_c1_g1,TR17775_c0_g2,TR52454_c2_g1,TR2468_c0_g1,TR2520_c8_g1	0.579367	0.736091	0.00335946
GO:0048037	cofactor binding	MF	3	877	54	15836	TR3180_c6_g1,TR55629_c0_g1,TR143_c0_g2	0.581406	0.737048	0.00342075
GO:0006357	regulation of transcription by RNA polymerase II	BP	1	254	54	15836	TR159997_c0_g1	0.582982	0.737414	0.00393701
GO:0051172	negative regulation of nitrogen compound metabolic process	BP	1	269	54	15836	TR159997_c0_g1	0.604151	0.760832	0.00371747
GO:0051188	cofactor biosynthetic process	BP	1	269	54	15836	TR639_c1_g1	0.604151	0.760832	0.00371747
GO:0043168	anion binding	MF	7	2140	54	15836	TR156193_c0_g1,TR639_c1_g1,TR17775_c0_g2,TR52454_c2_g1,TR2468_c0_g1,TR2520_c8_g1,TR55629_c0_g1	0.607408	0.763256	0.00327103
GO:0031324	negative regulation of cellular metabolic process	BP	1	278	54	15836	TR159997_c0_g1	0.616342	0.769407	0.00359712
GO:0005829	cytosol	CC	5	1545	54	15836	TR20991_c0_g1,TR33502_c1_g3,TR11823_c0_g1,TR123983_c0_g1,TR159997_c0_g1	0.616446	0.769407	0.00323625
GO:0006796	phosphate-containing compound metabolic process	BP	4	1236	54	15836	TR17775_c0_g2,TR2468_c0_g1,TR143_c0_g2,TR9241_c0_g2	0.616816	0.769407	0.00323625
GO:0008135	translation factor activity, RNA binding	MF	1	279	54	15836	TR65448_c0_g1	0.617674	0.769407	0.00358423
GO:0006793	phosphorus metabolic process	BP	4	1256	54	15836	TR17775_c0_g2,TR2468_c0_g1,TR143_c0_g2,TR9241_c0_g2	0.629759	0.782759	0.00318471
GO:0048869	cellular developmental process	BP	1	292	54	15836	TR159997_c0_g1	0.634578	0.787041	0.00342466
GO:0055114	oxidation-reduction process	BP	5	1591	54	15836	TR143_c0_g2,TR9241_c0_g2,TR49662_c0_g1,TR3180_c6_g1,TR5959_c1_g1	0.643147	0.795946	0.00314268
GO:0010605	negative regulation of macromolecule metabolic process	BP	1	302	54	15836	TR159997_c0_g1	0.647079	0.799087	0.00331126
GO:0016070	RNA metabolic process	BP	4	1290	54	15836	TR60505_c0_g1,TR46620_c0_g3,TR159997_c0_g1,TR11503_c0_g1	0.651146	0.80238	0.00310078
GO:0016773	phosphotransferase activity, alcohol group as acceptor	MF	1	311	54	15836	TR35533_c0_g1	0.657971	0.807851	0.00321543
GO:0044446	intracellular organelle part	CC	8	2550	54	15836	TR42615_c0_g1,TR159997_c0_g1,TR11823_c0_g1,TR20991_c0_g1,TR33502_c1_g3,TR43707_c0_g1,TR143_c0_g2,TR2468_c0_g1	0.658406	0.807851	0.00313725
GO:0005856	cytoskeleton	CC	1	313	54	15836	TR156723_c0_g2	0.660347	0.808221	0.00319489
GO:0006366	transcription by RNA polymerase II	BP	1	314	54	15836	TR159997_c0_g1	0.661528	0.808221	0.00318471
GO:0006732	coenzyme metabolic process	BP	1	316	54	15836	TR639_c1_g1	0.663879	0.808769	0.00316456
GO:0044422	organelle part	CC	8	2564	54	15836	TR43707_c0_g1,TR20991_c0_g1,TR33502_c1_g3,TR11823_c0_g1,TR42615_c0_g1,TR159997_c0_g1,TR143_c0_g2,TR2468_c0_g1	0.6648	0.808769	0.00312012
GO:0008652	cellular amino acid biosynthetic process	BP	1	320	54	15836	TR123983_c0_g1	0.668533	0.81127	0.003125
GO:0009892	negative regulation of metabolic process	BP	1	321	54	15836	TR159997_c0_g1	0.669687	0.81127	0.00311526
GO:2000112	regulation of cellular macromolecule biosynthetic process	BP	2	670	54	15836	TR159997_c0_g1,TR65448_c0_g1	0.672546	0.813015	0.00298507
GO:0044085	cellular component biogenesis	BP	3	1004	54	15836	TR20991_c0_g1,TR33502_c1_g3,TR159997_c0_g1	0.674149	0.813237	0.00298805
GO:0010556	regulation of macromolecule biosynthetic process	BP	2	675	54	15836	TR159997_c0_g1,TR65448_c0_g1	0.676567	0.813678	0.00296296
GO:0016043	cellular component organization	BP	4	1335	54	15836	TR20991_c0_g1,TR159997_c0_g1,TR33502_c1_g3,TR65448_c0_g1	0.678227	0.813678	0.00299625
GO:0005743	mitochondrial inner membrane	CC	1	329	54	15836	TR43707_c0_g1	0.678775	0.813678	0.00303951
GO:0019866	organelle inner membrane	CC	1	333	54	15836	TR43707_c0_g1	0.683227	0.817304	0.003003
GO:0016310	phosphorylation	BP	2	687	54	15836	TR143_c0_g2,TR9241_c0_g2	0.686056	0.818979	0.00291121
GO:0031326	regulation of cellular biosynthetic process	BP	2	694	54	15836	TR159997_c0_g1,TR65448_c0_g1	0.691488	0.823181	0.00288184
GO:0043167	ion binding	MF	11	3551	54	15836	TR24295_c0_g1,TR3263_c3_g1,TR639_c1_g1,TR77467_c0_g2,TR17775_c0_g2,TR2946_c0_g1,TR156193_c0_g1,TR52454_c2_g1,TR2468_c0_g1,TR2520_c8_g1,TR55629_c0_g1	0.692519	0.823181	0.00309772
GO:0008233	peptidase activity	MF	1	344	54	15836	TR5978_c0_g1	0.695158	0.823181	0.00290698
GO:0009889	regulation of biosynthetic process	BP	2	699	54	15836	TR159997_c0_g1,TR65448_c0_g1	0.695322	0.823181	0.00286123
GO:1901605	alpha-amino acid metabolic process	BP	1	348	54	15836	TR123983_c0_g1	0.699387	0.826286	0.00287356
GO:0032268	regulation of cellular protein metabolic process	BP	1	361	54	15836	TR65448_c0_g1	0.712736	0.840324	0.00277008
GO:0010468	regulation of gene expression	BP	2	725	54	15836	TR159997_c0_g1,TR65448_c0_g1	0.714645	0.840845	0.00275862
GO:0009057	macromolecule catabolic process	BP	1	366	54	15836	TR499_c0_g2	0.717714	0.842725	0.00273224
GO:0090304	nucleic acid metabolic process	BP	4	1425	54	15836	TR159997_c0_g1,TR60505_c0_g1,TR46620_c0_g3,TR11503_c0_g1	0.72809	0.85316	0.00280702
GO:0070013	intracellular organelle lumen	CC	2	755	54	15836	TR159997_c0_g1,TR11823_c0_g1	0.735687	0.856644	0.00264901
GO:0051246	regulation of protein metabolic process	BP	1	386	54	15836	TR65448_c0_g1	0.736792	0.856644	0.00259067
GO:0031974	membrane-enclosed lumen	CC	2	757	54	15836	TR159997_c0_g1,TR11823_c0_g1	0.737043	0.856644	0.00264201
GO:0043233	organelle lumen	CC	2	757	54	15836	TR159997_c0_g1,TR11823_c0_g1	0.737043	0.856644	0.00264201
GO:0033554	cellular response to stress	BP	1	394	54	15836	TR159997_c0_g1	0.744064	0.863054	0.00253807
GO:0034654	nucleobase-containing compound biosynthetic process	BP	3	1122	54	15836	TR17775_c0_g2,TR2468_c0_g1,TR159997_c0_g1	0.746418	0.864035	0.0026738
GO:0036094	small molecule binding	MF	8	2767	54	15836	TR156723_c0_g2,TR156193_c0_g1,TR639_c1_g1,TR17775_c0_g2,TR52454_c2_g1,TR2468_c0_g1,TR2520_c8_g1,TR55629_c0_g1	0.749738	0.866129	0.00289122
GO:0031966	mitochondrial membrane	CC	1	406	54	15836	TR43707_c0_g1	0.754603	0.869996	0.00246305
GO:0140096	catalytic activity, acting on a protein	MF	2	787	54	15836	TR5978_c0_g1,TR35533_c0_g1	0.756698	0.870658	0.0025413
GO:0017111	nucleoside-triphosphatase activity	MF	2	797	54	15836	TR2468_c0_g1,TR17775_c0_g2	0.762969	0.876115	0.00250941
GO:0055085	transmembrane transport	BP	3	1158	54	15836	TR17775_c0_g2,TR2468_c0_g1,TR43707_c0_g1	0.765833	0.877434	0.00259067
GO:0032502	developmental process	BP	1	421	54	15836	TR159997_c0_g1	0.76718	0.877434	0.0023753
GO:0044428	nuclear part	CC	2	810	54	15836	TR159997_c0_g1,TR11823_c0_g1	0.770918	0.879952	0.00246914
GO:0043227	membrane-bounded organelle	CC	11	3786	54	15836	TR46620_c0_g3,TR9241_c0_g2,TR9894_c0_g1,TR60505_c0_g1,TR1106_c3_g1,TR35533_c0_g1,TR43707_c0_g1,TR159997_c0_g1,TR11823_c0_g1,TR143_c0_g2,TR2468_c0_g1	0.775908	0.882413	0.00290544
GO:0031982	vesicle	CC	1	434	54	15836	TR35533_c0_g1	0.777567	0.882413	0.00230415
GO:0016301	kinase activity	MF	1	439	54	15836	TR35533_c0_g1	0.781439	0.882413	0.0022779
GO:0016462	pyrophosphatase activity	MF	2	829	54	15836	TR2468_c0_g1,TR17775_c0_g2	0.782127	0.882413	0.00241255
GO:0016818	hydrolase activity, acting on acid anhydrides, in phosphorus-containing anhydrides	MF	2	829	54	15836	TR2468_c0_g1,TR17775_c0_g2	0.782127	0.882413	0.00241255
GO:0005740	mitochondrial envelope	CC	1	442	54	15836	TR43707_c0_g1	0.783731	0.882413	0.00226244
GO:0016817	hydrolase activity, acting on acid anhydrides	MF	2	832	54	15836	TR2468_c0_g1,TR17775_c0_g2	0.783854	0.882413	0.00240385
GO:0048523	negative regulation of cellular process	BP	1	449	54	15836	TR159997_c0_g1	0.788987	0.88645	0.00222717
GO:0042254	ribosome biogenesis	BP	1	455	54	15836	TR20991_c0_g1	0.793392	0.889655	0.0021978
GO:0000166	nucleotide binding	MF	7	2582	54	15836	TR156193_c0_g1,TR639_c1_g1,TR17775_c0_g2,TR52454_c2_g1,TR2468_c0_g1,TR2520_c8_g1,TR156723_c0_g2	0.799298	0.892783	0.00271108
GO:1901265	nucleoside phosphate binding	MF	7	2582	54	15836	TR156723_c0_g2,TR156193_c0_g1,TR639_c1_g1,TR17775_c0_g2,TR52454_c2_g1,TR2468_c0_g1,TR2520_c8_g1	0.799298	0.892783	0.00271108
GO:0051171	regulation of nitrogen compound metabolic process	BP	2	863	54	15836	TR159997_c0_g1,TR65448_c0_g1	0.801018	0.892963	0.0023175
GO:0019438	aromatic compound biosynthetic process	BP	3	1235	54	15836	TR17775_c0_g2,TR2468_c0_g1,TR159997_c0_g1	0.803421	0.893904	0.00242915
GO:0006996	organelle organization	BP	2	875	54	15836	TR20991_c0_g1,TR159997_c0_g1	0.807339	0.896522	0.00228571
GO:0080090	regulation of primary metabolic process	BP	2	887	54	15836	TR159997_c0_g1,TR65448_c0_g1	0.813485	0.9016	0.00225479
GO:0031323	regulation of cellular metabolic process	BP	2	892	54	15836	TR159997_c0_g1,TR65448_c0_g1	0.815995	0.902636	0.00224215
GO:0060255	regulation of macromolecule metabolic process	BP	2	898	54	15836	TR159997_c0_g1,TR65448_c0_g1	0.818969	0.903668	0.00222717
GO:0018130	heterocycle biosynthetic process	BP	3	1273	54	15836	TR17775_c0_g2,TR2468_c0_g1,TR159997_c0_g1	0.820083	0.903668	0.00235664
GO:0048519	negative regulation of biological process	BP	1	500	54	15836	TR159997_c0_g1	0.823675	0.90454	0.002
GO:0006355	regulation of transcription, DNA-templated	BP	1	506	54	15836	TR159997_c0_g1	0.827368	0.90454	0.00197628
GO:1903506	regulation of nucleic acid-templated transcription	BP	1	509	54	15836	TR159997_c0_g1	0.829186	0.90454	0.00196464
GO:2001141	regulation of RNA biosynthetic process	BP	1	509	54	15836	TR159997_c0_g1	0.829186	0.90454	0.00196464
GO:0016491	oxidoreductase activity	MF	5	2009	54	15836	TR49662_c0_g1,TR3180_c6_g1,TR5959_c1_g1,TR143_c0_g2,TR9241_c0_g2	0.83187	0.90454	0.0024888
GO:1901362	organic cyclic compound biosynthetic process	BP	3	1306	54	15836	TR17775_c0_g2,TR2468_c0_g1,TR159997_c0_g1	0.833592	0.90454	0.00229709
GO:0043231	intracellular membrane-bounded organelle	CC	10	3672	54	15836	TR46620_c0_g3,TR9241_c0_g2,TR9894_c0_g1,TR60505_c0_g1,TR1106_c3_g1,TR43707_c0_g1,TR159997_c0_g1,TR11823_c0_g1,TR143_c0_g2,TR2468_c0_g1	0.835302	0.90454	0.00272331
GO:0071840	cellular component organization or biogenesis	BP	4	1681	54	15836	TR20991_c0_g1,TR159997_c0_g1,TR33502_c1_g3,TR65448_c0_g1	0.839028	0.90454	0.00237954
GO:0051252	regulation of RNA metabolic process	BP	1	527	54	15836	TR159997_c0_g1	0.839706	0.90454	0.00189753
GO:0050662	coenzyme binding	MF	1	528	54	15836	TR55629_c0_g1	0.840271	0.90454	0.00189394
GO:0005975	carbohydrate metabolic process	BP	1	529	54	15836	TR499_c0_g2	0.840835	0.90454	0.00189036
GO:0019222	regulation of metabolic process	BP	2	946	54	15836	TR159997_c0_g1,TR65448_c0_g1	0.841279	0.90454	0.00211416
GO:0098796	membrane protein complex	CC	1	530	54	15836	TR2468_c0_g1	0.841396	0.90454	0.00188679
GO:0007165	signal transduction	BP	1	533	54	15836	TR35533_c0_g1	0.843069	0.904642	0.00187617
GO:0023052	signaling	BP	1	544	54	15836	TR35533_c0_g1	0.849056	0.909363	0.00183824
GO:0019219	regulation of nucleobase-containing compound metabolic process	BP	1	561	54	15836	TR159997_c0_g1	0.85787	0.915162	0.00178253
GO:0016053	organic acid biosynthetic process	BP	1	564	54	15836	TR123983_c0_g1	0.859373	0.915162	0.00177305
GO:0046394	carboxylic acid biosynthetic process	BP	1	564	54	15836	TR123983_c0_g1	0.859373	0.915162	0.00177305
GO:0007154	cell communication	BP	1	567	54	15836	TR35533_c0_g1	0.860859	0.915162	0.00176367
GO:0044429	mitochondrial part	CC	1	576	54	15836	TR43707_c0_g1	0.865227	0.918102	0.00173611
GO:0006520	cellular amino acid metabolic process	BP	1	591	54	15836	TR123983_c0_g1	0.872209	0.9238	0.00169205
GO:0016787	hydrolase activity	MF	5	2163	54	15836	TR2468_c0_g1,TR5978_c0_g1,TR17775_c0_g2,TR499_c0_g2,TR219280_c0_g1	0.877586	0.926893	0.0023116
GO:0016021	integral component of membrane	CC	5	2166	54	15836	TR143_c0_g2,TR159997_c0_g1,TR17775_c0_g2,TR43707_c0_g1,TR9241_c0_g2	0.878365	0.926893	0.0023084
GO:0031224	intrinsic component of membrane	CC	5	2182	54	15836	TR143_c0_g2,TR159997_c0_g1,TR17775_c0_g2,TR43707_c0_g1,TR9241_c0_g2	0.882448	0.92887	0.00229148
GO:0046907	intracellular transport	BP	1	617	54	15836	TR159997_c0_g1	0.88348	0.92887	0.00162075
GO:0050794	regulation of cellular process	BP	3	1470	54	15836	TR35533_c0_g1,TR159997_c0_g1,TR65448_c0_g1	0.888752	0.930704	0.00204082
GO:0016772	transferase activity, transferring phosphorus-containing groups	MF	1	632	54	15836	TR35533_c0_g1	0.889533	0.930704	0.00158228
GO:0003824	catalytic activity	MF	20	7030	54	15836	TR159997_c0_g1,TR2468_c0_g1,TR5978_c0_g1,TR6811_c0_g1,TR123983_c0_g1,TR639_c1_g1,TR49662_c0_g1,TR3180_c6_g1,TR5959_c1_g1,TR35533_c0_g1,TR143_c0_g2,TR9241_c0_g2,TR2946_c0_g1,TR55629_c0_g1,TR17775_c0_g2,TR12547_c0_g1,TR11503_c0_g1,TR219280_c0_g1,TR499_c0_g2,TR99728_c0_g1	0.890753	0.930704	0.00284495
GO:0019752	carboxylic acid metabolic process	BP	2	1097	54	15836	TR123983_c0_g1,TR99728_c0_g1	0.896397	0.930704	0.00182315
GO:0031967	organelle envelope	CC	1	652	54	15836	TR43707_c0_g1	0.897125	0.930704	0.00153374
GO:0031975	envelope	CC	1	653	54	15836	TR43707_c0_g1	0.897491	0.930704	0.00153139
GO:1901575	organic substance catabolic process	BP	1	660	54	15836	TR499_c0_g2	0.900017	0.930704	0.00151515
GO:0043436	oxoacid metabolic process	BP	2	1112	54	15836	TR99728_c0_g1,TR123983_c0_g1	0.900794	0.930704	0.00179856
GO:0071705	nitrogen compound transport	BP	1	664	54	15836	TR84829_c0_g1	0.901432	0.930704	0.00150602
GO:0006082	organic acid metabolic process	BP	2	1118	54	15836	TR99728_c0_g1,TR123983_c0_g1	0.902505	0.930704	0.00178891
GO:0051649	establishment of localization in cell	BP	1	673	54	15836	TR159997_c0_g1	0.904546	0.930704	0.00148588
GO:0006351	transcription, DNA-templated	BP	1	680	54	15836	TR159997_c0_g1	0.906901	0.930704	0.00147059
GO:0097659	nucleic acid-templated transcription	BP	1	685	54	15836	TR159997_c0_g1	0.908548	0.930704	0.00145985
GO:0032774	RNA biosynthetic process	BP	1	687	54	15836	TR159997_c0_g1	0.909198	0.930704	0.0014556
GO:0050789	regulation of biological process	BP	3	1551	54	15836	TR35533_c0_g1,TR159997_c0_g1,TR65448_c0_g1	0.909588	0.930704	0.00193424
GO:0044283	small molecule biosynthetic process	BP	1	705	54	15836	TR123983_c0_g1	0.914854	0.933687	0.00141844
GO:0031090	organelle membrane	CC	1	708	54	15836	TR43707_c0_g1	0.915763	0.933687	0.00141243
GO:0071702	organic substance transport	BP	1	733	54	15836	TR84829_c0_g1	0.922972	0.939366	0.00136426
GO:0009056	catabolic process	BP	1	761	54	15836	TR499_c0_g2	0.930329	0.945175	0.00131406
GO:0044425	membrane part	CC	6	2791	54	15836	TR143_c0_g2,TR159997_c0_g1,TR17775_c0_g2,TR43707_c0_g1,TR9241_c0_g2,TR2468_c0_g1	0.932158	0.945357	0.00214977
GO:0006810	transport	BP	5	2452	54	15836	TR84829_c0_g1,TR17775_c0_g2,TR2468_c0_g1,TR159997_c0_g1,TR43707_c0_g1	0.935915	0.94749	0.00203915
GO:0051641	cellular localization	BP	1	801	54	15836	TR159997_c0_g1	0.939656	0.948859	0.00124844
GO:0051234	establishment of localization	BP	5	2484	54	15836	TR84829_c0_g1,TR17775_c0_g2,TR2468_c0_g1,TR159997_c0_g1,TR43707_c0_g1	0.940579	0.948859	0.00201288
GO:0012505	endomembrane system	CC	1	858	54	15836	TR35533_c0_g1	0.950864	0.957549	0.0011655
GO:0065007	biological regulation	BP	3	1803	54	15836	TR35533_c0_g1,TR159997_c0_g1,TR65448_c0_g1	0.954082	0.959103	0.00166389
GO:0051179	localization	BP	5	2624	54	15836	TR84829_c0_g1,TR17775_c0_g2,TR2468_c0_g1,TR159997_c0_g1,TR43707_c0_g1	0.957679	0.961033	0.00190549
GO:0005634	nucleus	CC	2	1896	54	15836	TR159997_c0_g1,TR11823_c0_g1	0.99155	0.991851	0.00105485
GO:0016020	membrane	CC	9	4744	54	15836	TR43707_c0_g1,TR143_c0_g2,TR2468_c0_g1,TR159997_c0_g1,TR17775_c0_g2,TR9241_c0_g2,TR35533_c0_g1,TR48963_c0_g1,TR84829_c0_g1	0.991851	0.991851	0.00189713

## Sheet: UP
GO_ID	Term	Category	Test	Ref	TestAll	RefAll	geneID	Pvalue	FDR	richFactor
GO:0003735	structural constituent of ribosome	MF	15	1090	41	15836	TR11823_c0_g1,TR169525_c0_g2,TR20991_c0_g1,TR23303_c0_g1,TR31443_c0_g4,TR42615_c0_g1,TR70654_c0_g1,TR77467_c0_g2,TR69912_c0_g2,TR7729_c0_g1,TR77710_c0_g1,TR20992_c0_g1,TR28841_c0_g1,TR33502_c1_g3,TR77589_c1_g4	3.87985e-08	1.4821e-05	0.0137615
GO:0005840	ribosome	CC	15	1266	41	15836	TR20991_c0_g1,TR33502_c1_g3,TR11823_c0_g1,TR42615_c0_g1,TR169525_c0_g2,TR23303_c0_g1,TR31443_c0_g4,TR70654_c0_g1,TR77467_c0_g2,TR69912_c0_g2,TR7729_c0_g1,TR77710_c0_g1,TR20992_c0_g1,TR28841_c0_g1,TR77589_c1_g4	2.78159e-07	5.31284e-05	0.0118483
GO:0005198	structural molecule activity	MF	15	1316	41	15836	TR11823_c0_g1,TR169525_c0_g2,TR20991_c0_g1,TR23303_c0_g1,TR31443_c0_g4,TR42615_c0_g1,TR70654_c0_g1,TR77467_c0_g2,TR69912_c0_g2,TR7729_c0_g1,TR77710_c0_g1,TR20992_c0_g1,TR28841_c0_g1,TR33502_c1_g3,TR77589_c1_g4	4.5934e-07	5.84893e-05	0.0113982
GO:0006412	translation	BP	16	1611	41	15836	TR20991_c0_g1,TR65448_c0_g1,TR7729_c0_g1,TR11823_c0_g1,TR169525_c0_g2,TR23303_c0_g1,TR31443_c0_g4,TR42615_c0_g1,TR70654_c0_g1,TR77467_c0_g2,TR69912_c0_g2,TR77710_c0_g1,TR20992_c0_g1,TR28841_c0_g1,TR33502_c1_g3,TR77589_c1_g4	1.06004e-06	8.5139e-05	0.00993172
GO:0043043	peptide biosynthetic process	BP	16	1617	41	15836	TR20991_c0_g1,TR11823_c0_g1,TR169525_c0_g2,TR23303_c0_g1,TR31443_c0_g4,TR42615_c0_g1,TR70654_c0_g1,TR77467_c0_g2,TR69912_c0_g2,TR77710_c0_g1,TR20992_c0_g1,TR28841_c0_g1,TR33502_c1_g3,TR77589_c1_g4,TR65448_c0_g1,TR7729_c0_g1	1.11438e-06	8.5139e-05	0.00989487
GO:0006518	peptide metabolic process	BP	16	1651	41	15836	TR20991_c0_g1,TR11823_c0_g1,TR169525_c0_g2,TR23303_c0_g1,TR31443_c0_g4,TR42615_c0_g1,TR70654_c0_g1,TR77467_c0_g2,TR69912_c0_g2,TR77710_c0_g1,TR20992_c0_g1,TR28841_c0_g1,TR33502_c1_g3,TR77589_c1_g4,TR65448_c0_g1,TR7729_c0_g1	1.47315e-06	9.37905e-05	0.0096911
GO:0043604	amide biosynthetic process	BP	16	1701	41	15836	TR20991_c0_g1,TR11823_c0_g1,TR169525_c0_g2,TR23303_c0_g1,TR31443_c0_g4,TR42615_c0_g1,TR70654_c0_g1,TR77467_c0_g2,TR69912_c0_g2,TR77710_c0_g1,TR20992_c0_g1,TR28841_c0_g1,TR33502_c1_g3,TR77589_c1_g4,TR65448_c0_g1,TR7729_c0_g1	2.19304e-06	0.000119677	0.00940623
GO:0043603	cellular amide metabolic process	BP	16	1773	41	15836	TR20991_c0_g1,TR11823_c0_g1,TR169525_c0_g2,TR23303_c0_g1,TR31443_c0_g4,TR42615_c0_g1,TR70654_c0_g1,TR77467_c0_g2,TR69912_c0_g2,TR77710_c0_g1,TR20992_c0_g1,TR28841_c0_g1,TR33502_c1_g3,TR77589_c1_g4,TR65448_c0_g1,TR7729_c0_g1	3.79441e-06	0.000181183	0.00902425
GO:1990904	ribonucleoprotein complex	CC	15	1586	41	15836	TR169525_c0_g2,TR23303_c0_g1,TR31443_c0_g4,TR70654_c0_g1,TR77467_c0_g2,TR69912_c0_g2,TR7729_c0_g1,TR77710_c0_g1,TR20992_c0_g1,TR28841_c0_g1,TR77589_c1_g4,TR42615_c0_g1,TR20991_c0_g1,TR33502_c1_g3,TR11823_c0_g1	4.87959e-06	0.000207111	0.00945776
GO:1901566	organonitrogen compound biosynthetic process	BP	19	2555	41	15836	TR20991_c0_g1,TR11823_c0_g1,TR169525_c0_g2,TR23303_c0_g1,TR31443_c0_g4,TR42615_c0_g1,TR70654_c0_g1,TR77467_c0_g2,TR69912_c0_g2,TR77710_c0_g1,TR20992_c0_g1,TR28841_c0_g1,TR33502_c1_g3,TR77589_c1_g4,TR65448_c0_g1,TR7729_c0_g1,TR17775_c0_g2,TR2468_c0_g1,TR123983_c0_g1	5.50044e-06	0.000210117	0.0074364
GO:0044444	cytoplasmic part	CC	25	4484	41	15836	TR46620_c0_g3,TR9241_c0_g2,TR9894_c0_g1,TR123983_c0_g1,TR169525_c0_g2,TR23303_c0_g1,TR31443_c0_g4,TR70654_c0_g1,TR77467_c0_g2,TR69912_c0_g2,TR7729_c0_g1,TR77710_c0_g1,TR20992_c0_g1,TR28841_c0_g1,TR77589_c1_g4,TR60505_c0_g1,TR1106_c3_g1,TR35533_c0_g1,TR42615_c0_g1,TR20991_c0_g1,TR33502_c1_g3,TR11823_c0_g1,TR43707_c0_g1,TR143_c0_g2,TR2468_c0_g1	1.27565e-05	0.000442999	0.00557538
GO:0034641	cellular nitrogen compound metabolic process	BP	22	3681	41	15836	TR20991_c0_g1,TR60505_c0_g1,TR46620_c0_g3,TR11823_c0_g1,TR169525_c0_g2,TR23303_c0_g1,TR31443_c0_g4,TR42615_c0_g1,TR70654_c0_g1,TR77467_c0_g2,TR69912_c0_g2,TR77710_c0_g1,TR20992_c0_g1,TR28841_c0_g1,TR33502_c1_g3,TR77589_c1_g4,TR65448_c0_g1,TR7729_c0_g1,TR17775_c0_g2,TR2468_c0_g1,TR143_c0_g2,TR9241_c0_g2	2.36682e-05	0.000753439	0.00597664
GO:0010467	gene expression	BP	18	2694	41	15836	TR20991_c0_g1,TR60505_c0_g1,TR46620_c0_g3,TR11823_c0_g1,TR169525_c0_g2,TR23303_c0_g1,TR31443_c0_g4,TR42615_c0_g1,TR70654_c0_g1,TR77467_c0_g2,TR69912_c0_g2,TR77710_c0_g1,TR20992_c0_g1,TR28841_c0_g1,TR33502_c1_g3,TR77589_c1_g4,TR65448_c0_g1,TR7729_c0_g1	5.07221e-05	0.00143821	0.00668151
GO:0005737	cytoplasm	CC	26	5178	41	15836	TR20991_c0_g1,TR33502_c1_g3,TR11823_c0_g1,TR46620_c0_g3,TR9241_c0_g2,TR9894_c0_g1,TR123983_c0_g1,TR169525_c0_g2,TR23303_c0_g1,TR31443_c0_g4,TR70654_c0_g1,TR77467_c0_g2,TR69912_c0_g2,TR7729_c0_g1,TR77710_c0_g1,TR20992_c0_g1,TR28841_c0_g1,TR77589_c1_g4,TR43707_c0_g1,TR35533_c0_g1,TR143_c0_g2,TR2468_c0_g1,TR60505_c0_g1,TR1106_c3_g1,TR42615_c0_g1,TR99728_c0_g1	5.27091e-05	0.00143821	0.00502124
GO:0043232	intracellular non-membrane-bounded organelle	CC	15	2011	41	15836	TR169525_c0_g2,TR23303_c0_g1,TR31443_c0_g4,TR70654_c0_g1,TR77467_c0_g2,TR69912_c0_g2,TR7729_c0_g1,TR77710_c0_g1,TR20992_c0_g1,TR28841_c0_g1,TR77589_c1_g4,TR11823_c0_g1,TR20991_c0_g1,TR33502_c1_g3,TR42615_c0_g1	8.46629e-05	0.00203301	0.00745898
GO:0043228	non-membrane-bounded organelle	CC	15	2012	41	15836	TR169525_c0_g2,TR23303_c0_g1,TR31443_c0_g4,TR70654_c0_g1,TR77467_c0_g2,TR69912_c0_g2,TR7729_c0_g1,TR77710_c0_g1,TR20992_c0_g1,TR28841_c0_g1,TR77589_c1_g4,TR11823_c0_g1,TR20991_c0_g1,TR33502_c1_g3,TR42615_c0_g1	8.51524e-05	0.00203301	0.00745527
GO:0044271	cellular nitrogen compound biosynthetic process	BP	18	2856	41	15836	TR20991_c0_g1,TR11823_c0_g1,TR169525_c0_g2,TR23303_c0_g1,TR31443_c0_g4,TR42615_c0_g1,TR70654_c0_g1,TR77467_c0_g2,TR69912_c0_g2,TR77710_c0_g1,TR20992_c0_g1,TR28841_c0_g1,TR33502_c1_g3,TR77589_c1_g4,TR65448_c0_g1,TR7729_c0_g1,TR17775_c0_g2,TR2468_c0_g1	0.000111935	0.00251524	0.00630252
GO:0034645	cellular macromolecule biosynthetic process	BP	16	2403	41	15836	TR20991_c0_g1,TR11823_c0_g1,TR169525_c0_g2,TR23303_c0_g1,TR31443_c0_g4,TR42615_c0_g1,TR70654_c0_g1,TR77467_c0_g2,TR69912_c0_g2,TR77710_c0_g1,TR20992_c0_g1,TR28841_c0_g1,TR33502_c1_g3,TR77589_c1_g4,TR65448_c0_g1,TR7729_c0_g1	0.000174741	0.0037084	0.00665834
GO:0009059	macromolecule biosynthetic process	BP	16	2421	41	15836	TR20991_c0_g1,TR11823_c0_g1,TR169525_c0_g2,TR23303_c0_g1,TR31443_c0_g4,TR42615_c0_g1,TR70654_c0_g1,TR77467_c0_g2,TR69912_c0_g2,TR77710_c0_g1,TR20992_c0_g1,TR28841_c0_g1,TR33502_c1_g3,TR77589_c1_g4,TR65448_c0_g1,TR7729_c0_g1	0.000191034	0.00384078	0.00660884
GO:0009058	biosynthetic process	BP	20	3598	41	15836	TR20991_c0_g1,TR11823_c0_g1,TR169525_c0_g2,TR23303_c0_g1,TR31443_c0_g4,TR42615_c0_g1,TR70654_c0_g1,TR77467_c0_g2,TR69912_c0_g2,TR77710_c0_g1,TR20992_c0_g1,TR28841_c0_g1,TR33502_c1_g3,TR77589_c1_g4,TR65448_c0_g1,TR7729_c0_g1,TR17775_c0_g2,TR2468_c0_g1,TR123983_c0_g1,TR55629_c0_g1	0.000220907	0.00421933	0.00555864
GO:1901564	organonitrogen compound metabolic process	BP	21	3999	41	15836	TR20991_c0_g1,TR11823_c0_g1,TR169525_c0_g2,TR23303_c0_g1,TR31443_c0_g4,TR42615_c0_g1,TR70654_c0_g1,TR77467_c0_g2,TR69912_c0_g2,TR77710_c0_g1,TR20992_c0_g1,TR28841_c0_g1,TR33502_c1_g3,TR77589_c1_g4,TR65448_c0_g1,TR7729_c0_g1,TR17775_c0_g2,TR2468_c0_g1,TR123983_c0_g1,TR143_c0_g2,TR9241_c0_g2	0.00031252	0.00568488	0.00525131
GO:0044267	cellular protein metabolic process	BP	16	2540	41	15836	TR20991_c0_g1,TR11823_c0_g1,TR169525_c0_g2,TR23303_c0_g1,TR31443_c0_g4,TR42615_c0_g1,TR70654_c0_g1,TR77467_c0_g2,TR69912_c0_g2,TR77710_c0_g1,TR20992_c0_g1,TR28841_c0_g1,TR33502_c1_g3,TR77589_c1_g4,TR65448_c0_g1,TR7729_c0_g1	0.000336709	0.00584649	0.00629921
GO:0043229	intracellular organelle	CC	24	5058	41	15836	TR46620_c0_g3,TR9241_c0_g2,TR9894_c0_g1,TR60505_c0_g1,TR1106_c3_g1,TR169525_c0_g2,TR23303_c0_g1,TR31443_c0_g4,TR70654_c0_g1,TR77467_c0_g2,TR69912_c0_g2,TR7729_c0_g1,TR77710_c0_g1,TR20992_c0_g1,TR28841_c0_g1,TR77589_c1_g4,TR11823_c0_g1,TR35533_c0_g1,TR20991_c0_g1,TR33502_c1_g3,TR43707_c0_g1,TR143_c0_g2,TR2468_c0_g1,TR42615_c0_g1	0.000394085	0.00654523	0.00474496
GO:0043226	organelle	CC	24	5095	41	15836	TR46620_c0_g3,TR9241_c0_g2,TR9894_c0_g1,TR60505_c0_g1,TR1106_c3_g1,TR169525_c0_g2,TR23303_c0_g1,TR31443_c0_g4,TR70654_c0_g1,TR77467_c0_g2,TR69912_c0_g2,TR7729_c0_g1,TR77710_c0_g1,TR20992_c0_g1,TR28841_c0_g1,TR77589_c1_g4,TR11823_c0_g1,TR35533_c0_g1,TR20991_c0_g1,TR33502_c1_g3,TR43707_c0_g1,TR143_c0_g2,TR2468_c0_g1,TR42615_c0_g1	0.00044493	0.0070818	0.0047105
GO:0044249	cellular biosynthetic process	BP	19	3485	41	15836	TR20991_c0_g1,TR11823_c0_g1,TR169525_c0_g2,TR23303_c0_g1,TR31443_c0_g4,TR42615_c0_g1,TR70654_c0_g1,TR77467_c0_g2,TR69912_c0_g2,TR77710_c0_g1,TR20992_c0_g1,TR28841_c0_g1,TR33502_c1_g3,TR77589_c1_g4,TR65448_c0_g1,TR7729_c0_g1,TR17775_c0_g2,TR2468_c0_g1,TR123983_c0_g1	0.000466852	0.00713349	0.00545194
GO:1901576	organic substance biosynthetic process	BP	19	3532	41	15836	TR20991_c0_g1,TR11823_c0_g1,TR169525_c0_g2,TR23303_c0_g1,TR31443_c0_g4,TR42615_c0_g1,TR70654_c0_g1,TR77467_c0_g2,TR69912_c0_g2,TR77710_c0_g1,TR20992_c0_g1,TR28841_c0_g1,TR33502_c1_g3,TR77589_c1_g4,TR65448_c0_g1,TR7729_c0_g1,TR17775_c0_g2,TR2468_c0_g1,TR123983_c0_g1	0.000557983	0.00819805	0.00537939
GO:0019538	protein metabolic process	BP	16	2768	41	15836	TR20991_c0_g1,TR11823_c0_g1,TR169525_c0_g2,TR23303_c0_g1,TR31443_c0_g4,TR42615_c0_g1,TR70654_c0_g1,TR77467_c0_g2,TR69912_c0_g2,TR77710_c0_g1,TR20992_c0_g1,TR28841_c0_g1,TR33502_c1_g3,TR77589_c1_g4,TR65448_c0_g1,TR7729_c0_g1	0.000902507	0.0127688	0.00578035
GO:0006807	nitrogen compound metabolic process	BP	23	5042	41	15836	TR20991_c0_g1,TR60505_c0_g1,TR46620_c0_g3,TR11823_c0_g1,TR169525_c0_g2,TR23303_c0_g1,TR31443_c0_g4,TR42615_c0_g1,TR70654_c0_g1,TR77467_c0_g2,TR69912_c0_g2,TR77710_c0_g1,TR20992_c0_g1,TR28841_c0_g1,TR33502_c1_g3,TR77589_c1_g4,TR65448_c0_g1,TR7729_c0_g1,TR17775_c0_g2,TR2468_c0_g1,TR123983_c0_g1,TR143_c0_g2,TR9241_c0_g2	0.00111816	0.0152549	0.00456168
GO:0071704	organic substance metabolic process	BP	25	5918	41	15836	TR20991_c0_g1,TR499_c0_g2,TR60505_c0_g1,TR46620_c0_g3,TR11823_c0_g1,TR169525_c0_g2,TR23303_c0_g1,TR31443_c0_g4,TR42615_c0_g1,TR70654_c0_g1,TR77467_c0_g2,TR69912_c0_g2,TR77710_c0_g1,TR20992_c0_g1,TR28841_c0_g1,TR33502_c1_g3,TR77589_c1_g4,TR65448_c0_g1,TR7729_c0_g1,TR17775_c0_g2,TR2468_c0_g1,TR99728_c0_g1,TR123983_c0_g1,TR143_c0_g2,TR9241_c0_g2	0.00180453	0.0230704	0.0042244
GO:0043170	macromolecule metabolic process	BP	19	3869	41	15836	TR20991_c0_g1,TR60505_c0_g1,TR46620_c0_g3,TR11823_c0_g1,TR169525_c0_g2,TR23303_c0_g1,TR31443_c0_g4,TR42615_c0_g1,TR70654_c0_g1,TR77467_c0_g2,TR69912_c0_g2,TR77710_c0_g1,TR20992_c0_g1,TR28841_c0_g1,TR33502_c1_g3,TR77589_c1_g4,TR65448_c0_g1,TR7729_c0_g1,TR499_c0_g2	0.00181181	0.0230704	0.00491083
GO:0044238	primary metabolic process	BP	24	5596	41	15836	TR20991_c0_g1,TR499_c0_g2,TR60505_c0_g1,TR46620_c0_g3,TR11823_c0_g1,TR169525_c0_g2,TR23303_c0_g1,TR31443_c0_g4,TR42615_c0_g1,TR70654_c0_g1,TR77467_c0_g2,TR69912_c0_g2,TR77710_c0_g1,TR20992_c0_g1,TR28841_c0_g1,TR33502_c1_g3,TR77589_c1_g4,TR65448_c0_g1,TR7729_c0_g1,TR17775_c0_g2,TR2468_c0_g1,TR123983_c0_g1,TR143_c0_g2,TR9241_c0_g2	0.00201284	0.0248034	0.00428878
GO:0044424	intracellular part	CC	26	6407	41	15836	TR99728_c0_g1,TR2468_c0_g1,TR43707_c0_g1,TR46620_c0_g3,TR9241_c0_g2,TR9894_c0_g1,TR123983_c0_g1,TR169525_c0_g2,TR23303_c0_g1,TR31443_c0_g4,TR70654_c0_g1,TR77467_c0_g2,TR69912_c0_g2,TR7729_c0_g1,TR77710_c0_g1,TR20992_c0_g1,TR28841_c0_g1,TR77589_c1_g4,TR60505_c0_g1,TR1106_c3_g1,TR35533_c0_g1,TR11823_c0_g1,TR20991_c0_g1,TR33502_c1_g3,TR42615_c0_g1,TR143_c0_g2	0.00248089	0.028584	0.00405806
GO:0032991	protein-containing complex	CC	16	3044	41	15836	TR169525_c0_g2,TR23303_c0_g1,TR31443_c0_g4,TR70654_c0_g1,TR77467_c0_g2,TR69912_c0_g2,TR7729_c0_g1,TR77710_c0_g1,TR20992_c0_g1,TR28841_c0_g1,TR77589_c1_g4,TR42615_c0_g1,TR2468_c0_g1,TR20991_c0_g1,TR33502_c1_g3,TR11823_c0_g1	0.00255808	0.028584	0.00525624
GO:0045548	phenylalanine ammonia-lyase activity	MF	1	1	41	15836	TR99728_c0_g1	0.00258904	0.028584	1
GO:0009536	plastid	CC	4	224	41	15836	TR143_c0_g2,TR2468_c0_g1,TR60505_c0_g1,TR1106_c3_g1	0.00261895	0.028584	0.0178571
GO:0044237	cellular metabolic process	BP	24	5756	41	15836	TR20991_c0_g1,TR60505_c0_g1,TR46620_c0_g3,TR11823_c0_g1,TR169525_c0_g2,TR23303_c0_g1,TR31443_c0_g4,TR42615_c0_g1,TR70654_c0_g1,TR77467_c0_g2,TR69912_c0_g2,TR77710_c0_g1,TR20992_c0_g1,TR28841_c0_g1,TR33502_c1_g3,TR77589_c1_g4,TR65448_c0_g1,TR7729_c0_g1,TR99728_c0_g1,TR17775_c0_g2,TR2468_c0_g1,TR123983_c0_g1,TR143_c0_g2,TR9241_c0_g2	0.00310421	0.0329392	0.00416956
GO:0008152	metabolic process	BP	29	7830	41	15836	TR20991_c0_g1,TR499_c0_g2,TR49662_c0_g1,TR3180_c6_g1,TR60505_c0_g1,TR46620_c0_g3,TR11823_c0_g1,TR169525_c0_g2,TR23303_c0_g1,TR31443_c0_g4,TR42615_c0_g1,TR70654_c0_g1,TR77467_c0_g2,TR69912_c0_g2,TR77710_c0_g1,TR20992_c0_g1,TR28841_c0_g1,TR33502_c1_g3,TR77589_c1_g4,TR65448_c0_g1,TR7729_c0_g1,TR99728_c0_g1,TR17775_c0_g2,TR55629_c0_g1,TR2468_c0_g1,TR123983_c0_g1,TR143_c0_g2,TR9241_c0_g2,TR219280_c0_g1	0.00464909	0.0479987	0.0037037
GO:0016841	ammonia-lyase activity	MF	1	2	41	15836	TR99728_c0_g1	0.00517154	0.0519394	0.5
GO:0044260	cellular macromolecule metabolic process	BP	16	3264	41	15836	TR20991_c0_g1,TR11823_c0_g1,TR169525_c0_g2,TR23303_c0_g1,TR31443_c0_g4,TR42615_c0_g1,TR70654_c0_g1,TR77467_c0_g2,TR69912_c0_g2,TR77710_c0_g1,TR20992_c0_g1,TR28841_c0_g1,TR33502_c1_g3,TR77589_c1_g4,TR65448_c0_g1,TR7729_c0_g1	0.00530271	0.0519394	0.00490196
GO:0005622	intracellular	CC	26	6735	41	15836	TR20991_c0_g1,TR33502_c1_g3,TR11823_c0_g1,TR46620_c0_g3,TR9241_c0_g2,TR9894_c0_g1,TR123983_c0_g1,TR169525_c0_g2,TR23303_c0_g1,TR31443_c0_g4,TR70654_c0_g1,TR77467_c0_g2,TR69912_c0_g2,TR7729_c0_g1,TR77710_c0_g1,TR20992_c0_g1,TR28841_c0_g1,TR77589_c1_g4,TR99728_c0_g1,TR43707_c0_g1,TR35533_c0_g1,TR143_c0_g2,TR2468_c0_g1,TR60505_c0_g1,TR1106_c3_g1,TR42615_c0_g1	0.00561078	0.0535829	0.00386043
GO:0009535	chloroplast thylakoid membrane	CC	2	45	41	15836	TR143_c0_g2,TR2468_c0_g1	0.00603433	0.0548836	0.0444444
GO:0055035	plastid thylakoid membrane	CC	2	45	41	15836	TR143_c0_g2,TR2468_c0_g1	0.00603433	0.0548836	0.0444444
GO:0009534	chloroplast thylakoid	CC	2	47	41	15836	TR143_c0_g2,TR2468_c0_g1	0.00656753	0.0570181	0.0425532
GO:0031976	plastid thylakoid	CC	2	47	41	15836	TR143_c0_g2,TR2468_c0_g1	0.00656753	0.0570181	0.0425532
GO:0042651	thylakoid membrane	CC	2	50	41	15836	TR143_c0_g2,TR2468_c0_g1	0.00740606	0.0628692	0.04
GO:0044464	cell part	CC	26	6938	41	15836	TR99728_c0_g1,TR2468_c0_g1,TR43707_c0_g1,TR46620_c0_g3,TR9241_c0_g2,TR9894_c0_g1,TR169525_c0_g2,TR23303_c0_g1,TR31443_c0_g4,TR70654_c0_g1,TR77467_c0_g2,TR69912_c0_g2,TR7729_c0_g1,TR77710_c0_g1,TR20992_c0_g1,TR28841_c0_g1,TR77589_c1_g4,TR11823_c0_g1,TR60505_c0_g1,TR1106_c3_g1,TR123983_c0_g1,TR20991_c0_g1,TR33502_c1_g3,TR35533_c0_g1,TR42615_c0_g1,TR143_c0_g2	0.00894549	0.0742865	0.00374748
GO:0005623	cell	CC	26	6964	41	15836	TR20991_c0_g1,TR33502_c1_g3,TR11823_c0_g1,TR46620_c0_g3,TR9241_c0_g2,TR9894_c0_g1,TR123983_c0_g1,TR169525_c0_g2,TR23303_c0_g1,TR31443_c0_g4,TR70654_c0_g1,TR77467_c0_g2,TR69912_c0_g2,TR7729_c0_g1,TR77710_c0_g1,TR20992_c0_g1,TR28841_c0_g1,TR77589_c1_g4,TR99728_c0_g1,TR43707_c0_g1,TR35533_c0_g1,TR143_c0_g2,TR2468_c0_g1,TR60505_c0_g1,TR1106_c3_g1,TR42615_c0_g1	0.00947678	0.077024	0.00373349
GO:0003674	molecular_function	MF	37	11768	41	15836	TR35533_c0_g1,TR99728_c0_g1,TR3263_c3_g1,TR22233_c0_g1,TR42615_c0_g1,TR33502_c1_g3,TR11823_c0_g1,TR169525_c0_g2,TR20991_c0_g1,TR23303_c0_g1,TR31443_c0_g4,TR70654_c0_g1,TR77467_c0_g2,TR69912_c0_g2,TR7729_c0_g1,TR77710_c0_g1,TR20992_c0_g1,TR28841_c0_g1,TR77589_c1_g4,TR65448_c0_g1,TR2468_c0_g1,TR123983_c0_g1,TR49662_c0_g1,TR3180_c6_g1,TR43707_c0_g1,TR70035_c0_g2,TR17775_c0_g2,TR156193_c0_g1,TR52454_…	0.0102608	0.0816586	0.00314412
GO:0046034	ATP metabolic process	BP	4	343	41	15836	TR17775_c0_g2,TR2468_c0_g1,TR143_c0_g2,TR9241_c0_g2	0.0116558	0.0894314	0.0116618
GO:0009987	cellular process	BP	26	7061	41	15836	TR20991_c0_g1,TR35533_c0_g1,TR60505_c0_g1,TR46620_c0_g3,TR11823_c0_g1,TR169525_c0_g2,TR23303_c0_g1,TR31443_c0_g4,TR42615_c0_g1,TR70654_c0_g1,TR77467_c0_g2,TR69912_c0_g2,TR77710_c0_g1,TR20992_c0_g1,TR28841_c0_g1,TR33502_c1_g3,TR77589_c1_g4,TR65448_c0_g1,TR7729_c0_g1,TR99728_c0_g1,TR17775_c0_g2,TR2468_c0_g1,TR123983_c0_g1,TR143_c0_g2,TR9241_c0_g2,TR3180_c6_g1	0.0117057	0.0894314	0.0036822
GO:0009144	purine nucleoside triphosphate metabolic process	BP	4	353	41	15836	TR17775_c0_g2,TR2468_c0_g1,TR143_c0_g2,TR9241_c0_g2	0.0128425	0.094343	0.0113314
GO:0009205	purine ribonucleoside triphosphate metabolic process	BP	4	353	41	15836	TR17775_c0_g2,TR2468_c0_g1,TR143_c0_g2,TR9241_c0_g2	0.0128425	0.094343	0.0113314
GO:0009199	ribonucleoside triphosphate metabolic process	BP	4	365	41	15836	TR17775_c0_g2,TR2468_c0_g1,TR143_c0_g2,TR9241_c0_g2	0.0143659	0.103543	0.0109589
GO:0009141	nucleoside triphosphate metabolic process	BP	4	368	41	15836	TR17775_c0_g2,TR2468_c0_g1,TR143_c0_g2,TR9241_c0_g2	0.014764	0.104441	0.0108696
GO:0008137	NADH dehydrogenase (ubiquinone) activity	MF	2	74	41	15836	TR143_c0_g2,TR9241_c0_g2	0.015704	0.109072	0.027027
GO:0050136	NADH dehydrogenase (quinone) activity	MF	2	76	41	15836	TR143_c0_g2,TR9241_c0_g2	0.0165166	0.112667	0.0263158
GO:0016655	oxidoreductase activity, acting on NAD(P)H, quinone or similar compound as acceptor	MF	2	77	41	15836	TR143_c0_g2,TR9241_c0_g2	0.0169295	0.113458	0.025974
GO:0006952	defense response	BP	2	78	41	15836	TR35533_c0_g1,TR99728_c0_g1	0.0173469	0.113762	0.025641
GO:0042773	ATP synthesis coupled electron transport	BP	2	79	41	15836	TR143_c0_g2,TR9241_c0_g2	0.0177686	0.113762	0.0253165
GO:0044434	chloroplast part	CC	2	80	41	15836	TR143_c0_g2,TR2468_c0_g1	0.0181946	0.113762	0.025
GO:0003954	NADH dehydrogenase activity	MF	2	81	41	15836	TR143_c0_g2,TR9241_c0_g2	0.018625	0.113762	0.0246914
GO:0009126	purine nucleoside monophosphate metabolic process	BP	4	397	41	15836	TR17775_c0_g2,TR2468_c0_g1,TR143_c0_g2,TR9241_c0_g2	0.0189774	0.113762	0.0100756
GO:0009167	purine ribonucleoside monophosphate metabolic process	BP	4	397	41	15836	TR17775_c0_g2,TR2468_c0_g1,TR143_c0_g2,TR9241_c0_g2	0.0189774	0.113762	0.0100756
GO:0044435	plastid part	CC	2	82	41	15836	TR143_c0_g2,TR2468_c0_g1	0.0190597	0.113762	0.0243902
GO:0009161	ribonucleoside monophosphate metabolic process	BP	4	409	41	15836	TR17775_c0_g2,TR2468_c0_g1,TR143_c0_g2,TR9241_c0_g2	0.0209193	0.122941	0.00977995
GO:0009123	nucleoside monophosphate metabolic process	BP	4	411	41	15836	TR17775_c0_g2,TR2468_c0_g1,TR143_c0_g2,TR9241_c0_g2	0.0212544	0.123018	0.00973236
GO:0004410	homocitrate synthase activity	MF	1	9	41	15836	TR123983_c0_g1	0.0230672	0.129584	0.111111
GO:0016840	carbon-nitrogen lyase activity	MF	1	9	41	15836	TR99728_c0_g1	0.0230672	0.129584	0.111111
GO:0034357	photosynthetic membrane	CC	2	94	41	15836	TR143_c0_g2,TR2468_c0_g1	0.0246027	0.136206	0.0212766
GO:0006119	oxidative phosphorylation	BP	2	95	41	15836	TR143_c0_g2,TR9241_c0_g2	0.0250911	0.136926	0.0210526
GO:0044436	thylakoid part	CC	2	96	41	15836	TR143_c0_g2,TR2468_c0_g1	0.0255835	0.137647	0.0208333
GO:0022904	respiratory electron transport chain	BP	2	97	41	15836	TR143_c0_g2,TR9241_c0_g2	0.0260799	0.138368	0.0206186
GO:0009150	purine ribonucleotide metabolic process	BP	4	461	41	15836	TR17775_c0_g2,TR2468_c0_g1,TR143_c0_g2,TR9241_c0_g2	0.0307311	0.160812	0.00867679
GO:0019878	lysine biosynthetic process via aminoadipic acid	BP	1	13	41	15836	TR123983_c0_g1	0.0331519	0.16974	0.0769231
GO:0006163	purine nucleotide metabolic process	BP	4	474	41	15836	TR17775_c0_g2,TR2468_c0_g1,TR143_c0_g2,TR9241_c0_g2	0.0335475	0.16974	0.00843882
GO:0009259	ribonucleotide metabolic process	BP	4	475	41	15836	TR17775_c0_g2,TR2468_c0_g1,TR143_c0_g2,TR9241_c0_g2	0.0337703	0.16974	0.00842105
GO:0008553	proton-exporting ATPase activity, phosphorylative mechanism	MF	1	14	41	15836	TR17775_c0_g2	0.0356572	0.170871	0.0714286
GO:0022900	electron transport chain	BP	2	115	41	15836	TR143_c0_g2,TR9241_c0_g2	0.0356646	0.170871	0.0173913
GO:0019829	cation-transporting ATPase activity	MF	2	116	41	15836	TR2468_c0_g1,TR17775_c0_g2	0.0362318	0.170871	0.0172414
GO:0022853	active ion transmembrane transporter activity	MF	2	116	41	15836	TR2468_c0_g1,TR17775_c0_g2	0.0362318	0.170871	0.0172414
GO:0042625	ATPase coupled ion transmembrane transporter activity	MF	2	116	41	15836	TR2468_c0_g1,TR17775_c0_g2	0.0362318	0.170871	0.0172414
GO:0009579	thylakoid	CC	2	123	41	15836	TR143_c0_g2,TR2468_c0_g1	0.0402994	0.181503	0.0162602
GO:0006452	translational frameshifting	BP	1	16	41	15836	TR65448_c0_g1	0.0406487	0.181503	0.0625
GO:0045901	positive regulation of translational elongation	BP	1	16	41	15836	TR65448_c0_g1	0.0406487	0.181503	0.0625
GO:0045905	positive regulation of translational termination	BP	1	16	41	15836	TR65448_c0_g1	0.0406487	0.181503	0.0625
GO:0044391	ribosomal subunit	CC	4	505	41	15836	TR42615_c0_g1,TR20991_c0_g1,TR33502_c1_g3,TR11823_c0_g1	0.040862	0.181503	0.00792079
GO:0072521	purine-containing compound metabolic process	BP	4	507	41	15836	TR17775_c0_g2,TR2468_c0_g1,TR143_c0_g2,TR9241_c0_g2	0.041363	0.181617	0.00788955
GO:0006449	regulation of translational termination	BP	1	17	41	15836	TR65448_c0_g1	0.0431351	0.185141	0.0588235
GO:0043243	positive regulation of protein complex disassembly	BP	1	17	41	15836	TR65448_c0_g1	0.0431351	0.185141	0.0588235
GO:0019693	ribose phosphate metabolic process	BP	4	523	41	15836	TR17775_c0_g2,TR2468_c0_g1,TR143_c0_g2,TR9241_c0_g2	0.0454985	0.193116	0.00764818
GO:0015662	ATPase activity, coupled to transmembrane movement of ions, phosphorylative mechanism	MF	1	19	41	15836	TR17775_c0_g2	0.0480888	0.201867	0.0526316
GO:0006448	regulation of translational elongation	BP	1	20	41	15836	TR65448_c0_g1	0.0505563	0.207085	0.05
GO:0098542	defense response to other organism	BP	1	20	41	15836	TR35533_c0_g1	0.0505563	0.207085	0.05
GO:0022626	cytosolic ribosome	CC	3	325	41	15836	TR20991_c0_g1,TR33502_c1_g3,TR11823_c0_g1	0.051491	0.207085	0.00923077
GO:0016651	oxidoreductase activity, acting on NAD(P)H	MF	2	141	41	15836	TR143_c0_g2,TR9241_c0_g2	0.0515003	0.207085	0.0141844
GO:0006414	translational elongation	BP	2	145	41	15836	TR65448_c0_g1,TR7729_c0_g1	0.0541258	0.215376	0.0137931
GO:0048038	quinone binding	MF	1	24	41	15836	TR143_c0_g2	0.060364	0.237722	0.0416667
GO:0009117	nucleotide metabolic process	BP	4	582	41	15836	TR17775_c0_g2,TR2468_c0_g1,TR143_c0_g2,TR9241_c0_g2	0.0627017	0.242321	0.00687285
GO:0070181	small ribosomal subunit rRNA binding	MF	1	25	41	15836	TR11823_c0_g1	0.0628005	0.242321	0.04
GO:0006753	nucleoside phosphate metabolic process	BP	4	589	41	15836	TR17775_c0_g2,TR2468_c0_g1,TR143_c0_g2,TR9241_c0_g2	0.0649452	0.248091	0.00679117
GO:0042626	ATPase activity, coupled to transmembrane movement of substances	MF	2	165	41	15836	TR2468_c0_g1,TR17775_c0_g2	0.0679345	0.25694	0.0121212
GO:0006553	lysine metabolic process	BP	1	28	41	15836	TR123983_c0_g1	0.0700729	0.257476	0.0357143
GO:0009085	lysine biosynthetic process	BP	1	28	41	15836	TR123983_c0_g1	0.0700729	0.257476	0.0357143
GO:0043492	ATPase activity, coupled to movement of substances	MF	2	168	41	15836	TR2468_c0_g1,TR17775_c0_g2	0.0700981	0.257476	0.0119048
GO:0022625	cytosolic large ribosomal subunit	CC	2	178	41	15836	TR20991_c0_g1,TR33502_c1_g3	0.0774712	0.281848	0.011236
GO:0009507	chloroplast	CC	2	180	41	15836	TR143_c0_g2,TR2468_c0_g1	0.0789746	0.282007	0.0111111
GO:0015399	primary active transmembrane transporter activity	MF	2	181	41	15836	TR2468_c0_g1,TR17775_c0_g2	0.0797298	0.282007	0.0110497
GO:0015405	P-P-bond-hydrolysis-driven transmembrane transporter activity	MF	2	181	41	15836	TR2468_c0_g1,TR17775_c0_g2	0.0797298	0.282007	0.0110497
GO:0043244	regulation of protein complex disassembly	BP	1	34	41	15836	TR65448_c0_g1	0.0844529	0.295973	0.0294118
GO:0055086	nucleobase-containing small molecule metabolic process	BP	4	678	41	15836	TR17775_c0_g2,TR2468_c0_g1,TR143_c0_g2,TR9241_c0_g2	0.0970873	0.337158	0.00589971
GO:0044445	cytosolic part	CC	3	428	41	15836	TR20991_c0_g1,TR33502_c1_g3,TR11823_c0_g1	0.098473	0.338889	0.00700935
GO:0043022	ribosome binding	MF	1	41	41	15836	TR65448_c0_g1	0.100956	0.341783	0.0243902
GO:0019637	organophosphate metabolic process	BP	4	688	41	15836	TR17775_c0_g2,TR2468_c0_g1,TR143_c0_g2,TR9241_c0_g2	0.101103	0.341783	0.00581395
GO:0022618	ribonucleoprotein complex assembly	BP	2	210	41	15836	TR20991_c0_g1,TR33502_c1_g3	0.102568	0.343693	0.00952381
GO:0045261	proton-transporting ATP synthase complex, catalytic core F(1)	CC	1	43	41	15836	TR2468_c0_g1	0.105617	0.349152	0.0232558
GO:0017144	drug metabolic process	BP	4	700	41	15836	TR17775_c0_g2,TR2468_c0_g1,TR143_c0_g2,TR9241_c0_g2	0.106025	0.349152	0.00571429
GO:0071826	ribonucleoprotein complex subunit organization	BP	2	217	41	15836	TR20991_c0_g1,TR33502_c1_g3	0.108328	0.353688	0.00921659
GO:1901135	carbohydrate derivative metabolic process	BP	4	708	41	15836	TR17775_c0_g2,TR2468_c0_g1,TR143_c0_g2,TR9241_c0_g2	0.109368	0.354056	0.00564972
GO:0006415	translational termination	BP	1	47	41	15836	TR65448_c0_g1	0.114869	0.368741	0.0212766
GO:0006754	ATP biosynthetic process	BP	2	226	41	15836	TR2468_c0_g1,TR17775_c0_g2	0.115861	0.368823	0.00884956
GO:0045333	cellular respiration	BP	2	232	41	15836	TR143_c0_g2,TR9241_c0_g2	0.120956	0.378307	0.00862069
GO:0009145	purine nucleoside triphosphate biosynthetic process	BP	2	233	41	15836	TR17775_c0_g2,TR2468_c0_g1	0.121811	0.378307	0.00858369
GO:0009206	purine ribonucleoside triphosphate biosynthetic process	BP	2	233	41	15836	TR17775_c0_g2,TR2468_c0_g1	0.121811	0.378307	0.00858369
GO:0043207	response to external biotic stimulus	BP	1	53	41	15836	TR35533_c0_g1	0.128573	0.392919	0.0188679
GO:0051707	response to other organism	BP	1	53	41	15836	TR35533_c0_g1	0.128573	0.392919	0.0188679
GO:0009201	ribonucleoside triphosphate biosynthetic process	BP	2	245	41	15836	TR17775_c0_g2,TR2468_c0_g1	0.132184	0.397205	0.00816327
GO:0009142	nucleoside triphosphate biosynthetic process	BP	2	246	41	15836	TR17775_c0_g2,TR2468_c0_g1	0.133058	0.397205	0.00813008
GO:0046933	proton-transporting ATP synthase activity, rotational mechanism	MF	1	55	41	15836	TR2468_c0_g1	0.133095	0.397205	0.0181818
GO:0009607	response to biotic stimulus	BP	1	56	41	15836	TR35533_c0_g1	0.135347	0.398713	0.0178571
GO:0015934	large ribosomal subunit	CC	2	249	41	15836	TR20991_c0_g1,TR33502_c1_g3	0.135688	0.398713	0.00803213
GO:0015935	small ribosomal subunit	CC	2	256	41	15836	TR11823_c0_g1,TR42615_c0_g1	0.141869	0.407513	0.0078125
GO:0045727	positive regulation of translation	BP	1	59	41	15836	TR65448_c0_g1	0.14207	0.407513	0.0169492
GO:0042623	ATPase activity, coupled	MF	2	258	41	15836	TR2468_c0_g1,TR17775_c0_g2	0.143647	0.407513	0.00775194
GO:1902600	proton transmembrane transport	BP	2	260	41	15836	TR2468_c0_g1,TR17775_c0_g2	0.145429	0.407513	0.00769231
GO:0022804	active transmembrane transporter activity	MF	2	261	41	15836	TR2468_c0_g1,TR17775_c0_g2	0.146322	0.407513	0.00766284
GO:0034250	positive regulation of cellular amide metabolic process	BP	1	61	41	15836	TR65448_c0_g1	0.146523	0.407513	0.0163934
GO:0008483	transaminase activity	MF	1	61	41	15836	TR55629_c0_g1	0.146523	0.407513	0.0163934
GO:0031984	organelle subcompartment	CC	2	262	41	15836	TR143_c0_g2,TR2468_c0_g1	0.147217	0.407513	0.00763359
GO:0016769	transferase activity, transferring nitrogenous groups	MF	1	63	41	15836	TR55629_c0_g1	0.150954	0.409437	0.015873
GO:0043021	ribonucleoprotein complex binding	MF	1	63	41	15836	TR65448_c0_g1	0.150954	0.409437	0.015873
GO:0009611	response to wounding	BP	1	64	41	15836	TR99728_c0_g1	0.153161	0.409437	0.015625
GO:0019904	protein domain specific binding	MF	1	64	41	15836	TR1673_c1_g1	0.153161	0.409437	0.015625
GO:0015980	energy derivation by oxidation of organic compounds	BP	2	269	41	15836	TR143_c0_g2,TR9241_c0_g2	0.153509	0.409437	0.00743494
GO:0015078	proton transmembrane transporter activity	MF	2	270	41	15836	TR2468_c0_g1,TR17775_c0_g2	0.154412	0.409437	0.00740741
GO:0008144	drug binding	MF	6	1417	41	15836	TR156193_c0_g1,TR17775_c0_g2,TR52454_c2_g1,TR2468_c0_g1,TR2520_c8_g1,TR55629_c0_g1	0.156112	0.409437	0.0042343
GO:0000027	ribosomal large subunit assembly	BP	1	66	41	15836	TR20991_c0_g1	0.157558	0.409437	0.0151515
GO:0036442	proton-exporting ATPase activity	MF	1	66	41	15836	TR17775_c0_g2	0.157558	0.409437	0.0151515
GO:0043624	cellular protein complex disassembly	BP	1	68	41	15836	TR65448_c0_g1	0.161933	0.417813	0.0147059
GO:0005768	endosome	CC	1	69	41	15836	TR35533_c0_g1	0.164112	0.417813	0.0144928
GO:0009127	purine nucleoside monophosphate biosynthetic process	BP	2	282	41	15836	TR17775_c0_g2,TR2468_c0_g1	0.165334	0.417813	0.0070922
GO:0009168	purine ribonucleoside monophosphate biosynthetic process	BP	2	282	41	15836	TR17775_c0_g2,TR2468_c0_g1	0.165334	0.417813	0.0070922
GO:0015077	monovalent inorganic cation transmembrane transporter activity	MF	2	283	41	15836	TR2468_c0_g1,TR17775_c0_g2	0.16625	0.417813	0.00706714
GO:0015672	monovalent inorganic cation transport	BP	2	289	41	15836	TR17775_c0_g2,TR2468_c0_g1	0.171769	0.428568	0.00692042
GO:0033178	proton-transporting two-sector ATPase complex, catalytic domain	CC	1	73	41	15836	TR2468_c0_g1	0.172774	0.428568	0.0136986
GO:0009156	ribonucleoside monophosphate biosynthetic process	BP	2	294	41	15836	TR17775_c0_g2,TR2468_c0_g1	0.176393	0.434206	0.00680272
GO:0009124	nucleoside monophosphate biosynthetic process	BP	2	295	41	15836	TR17775_c0_g2,TR2468_c0_g1	0.17732	0.434206	0.00677966
GO:0008150	biological_process	BP	31	10713	41	15836	TR20991_c0_g1,TR219280_c0_g1,TR99728_c0_g1,TR35533_c0_g1,TR499_c0_g2,TR49662_c0_g1,TR3180_c6_g1,TR60505_c0_g1,TR46620_c0_g3,TR11823_c0_g1,TR169525_c0_g2,TR23303_c0_g1,TR31443_c0_g4,TR42615_c0_g1,TR70654_c0_g1,TR77467_c0_g2,TR69912_c0_g2,TR77710_c0_g1,TR20992_c0_g1,TR28841_c0_g1,TR33502_c1_g3,TR77589_c1_g4,TR65448_c0_g1,TR7729_c0_g1,TR17775_c0_g2,TR55629_c0_g1,TR2468_c0_g1,TR123983_c0_g1,TR143_c0_…	0.178577	0.434499	0.00289368
GO:0046912	transferase activity, transferring acyl groups, acyl groups converted into alkyl on transfer	MF	1	79	41	15836	TR123983_c0_g1	0.185602	0.448734	0.0126582
GO:0004601	peroxidase activity	MF	1	82	41	15836	TR3180_c6_g1	0.191943	0.461146	0.0121951
GO:0003723	RNA binding	MF	4	883	41	15836	TR65448_c0_g1,TR11823_c0_g1,TR42615_c0_g1,TR33502_c1_g3	0.193361	0.461649	0.00453001
GO:0098662	inorganic cation transmembrane transport	BP	2	317	41	15836	TR17775_c0_g2,TR2468_c0_g1	0.197909	0.467445	0.00630915
GO:0098869	cellular oxidant detoxification	BP	1	85	41	15836	TR3180_c6_g1	0.198236	0.467445	0.0117647
GO:0043933	protein-containing complex subunit organization	BP	3	602	41	15836	TR20991_c0_g1,TR33502_c1_g3,TR65448_c0_g1	0.203591	0.470937	0.00498339
GO:0009067	aspartate family amino acid biosynthetic process	BP	1	88	41	15836	TR123983_c0_g1	0.204481	0.470937	0.0113636
GO:0015985	energy coupled proton transport, down electrochemical gradient	BP	1	89	41	15836	TR2468_c0_g1	0.206552	0.470937	0.011236
GO:0015986	ATP synthesis coupled proton transport	BP	1	89	41	15836	TR2468_c0_g1	0.206552	0.470937	0.011236
GO:0022890	inorganic cation transmembrane transporter activity	MF	2	327	41	15836	TR2468_c0_g1,TR17775_c0_g2	0.20737	0.470937	0.00611621
GO:0098660	inorganic ion transmembrane transport	BP	2	329	41	15836	TR17775_c0_g2,TR2468_c0_g1	0.209269	0.470937	0.00607903
GO:0004497	monooxygenase activity	MF	1	91	41	15836	TR49662_c0_g1	0.210679	0.470937	0.010989
GO:0045259	proton-transporting ATP synthase complex	CC	1	91	41	15836	TR2468_c0_g1	0.210679	0.470937	0.010989
GO:0016684	oxidoreductase activity, acting on peroxide as acceptor	MF	1	92	41	15836	TR3180_c6_g1	0.212734	0.470937	0.0108696
GO:0009152	purine ribonucleotide biosynthetic process	BP	2	335	41	15836	TR17775_c0_g2,TR2468_c0_g1	0.214978	0.470937	0.00597015
GO:0044769	ATPase activity, coupled to transmembrane movement of ions, rotational mechanism	MF	1	95	41	15836	TR2468_c0_g1	0.218869	0.470937	0.0105263
GO:0015988	energy coupled proton transmembrane transport, against electrochemical gradient	BP	1	96	41	15836	TR2468_c0_g1	0.220904	0.470937	0.0104167
GO:0015991	ATP hydrolysis coupled proton transport	BP	1	96	41	15836	TR2468_c0_g1	0.220904	0.470937	0.0104167
GO:0032984	protein-containing complex disassembly	BP	1	96	41	15836	TR65448_c0_g1	0.220904	0.470937	0.0104167
GO:0099131	ATP hydrolysis coupled ion transmembrane transport	BP	1	96	41	15836	TR2468_c0_g1	0.220904	0.470937	0.0104167
GO:0099132	ATP hydrolysis coupled cation transmembrane transport	BP	1	96	41	15836	TR2468_c0_g1	0.220904	0.470937	0.0104167
GO:0090662	ATP hydrolysis coupled transmembrane transport	BP	1	97	41	15836	TR2468_c0_g1	0.222933	0.470937	0.0103093
GO:1990748	cellular detoxification	BP	1	97	41	15836	TR3180_c6_g1	0.222933	0.470937	0.0103093
GO:0006164	purine nucleotide biosynthetic process	BP	2	345	41	15836	TR17775_c0_g2,TR2468_c0_g1	0.224526	0.470937	0.0057971
GO:0098754	detoxification	BP	1	98	41	15836	TR3180_c6_g1	0.224957	0.470937	0.0102041
GO:0098655	cation transmembrane transport	BP	2	347	41	15836	TR17775_c0_g2,TR2468_c0_g1	0.226441	0.470937	0.00576369
GO:0009260	ribonucleotide biosynthetic process	BP	2	349	41	15836	TR17775_c0_g2,TR2468_c0_g1	0.228356	0.470937	0.00573066
GO:0046390	ribose phosphate biosynthetic process	BP	2	353	41	15836	TR17775_c0_g2,TR2468_c0_g1	0.232192	0.470937	0.00566572
GO:0009066	aspartate family amino acid metabolic process	BP	1	102	41	15836	TR123983_c0_g1	0.233003	0.470937	0.00980392
GO:0042255	ribosome assembly	BP	1	102	41	15836	TR20991_c0_g1	0.233003	0.470937	0.00980392
GO:0030170	pyridoxal phosphate binding	MF	1	102	41	15836	TR55629_c0_g1	0.233003	0.470937	0.00980392
GO:0070279	vitamin B6 binding	MF	1	102	41	15836	TR55629_c0_g1	0.233003	0.470937	0.00980392
GO:0072522	purine-containing compound biosynthetic process	BP	2	359	41	15836	TR17775_c0_g2,TR2468_c0_g1	0.237954	0.478413	0.00557103
GO:0005524	ATP binding	MF	5	1292	41	15836	TR156193_c0_g1,TR17775_c0_g2,TR52454_c2_g1,TR2468_c0_g1,TR2520_c8_g1	0.240112	0.480224	0.00386997
GO:0006950	response to stress	BP	3	658	41	15836	TR99728_c0_g1,TR3180_c6_g1,TR35533_c0_g1	0.24188	0.480495	0.00455927
GO:0008324	cation transmembrane transporter activity	MF	2	364	41	15836	TR2468_c0_g1,TR17775_c0_g2	0.242763	0.480495	0.00549451
GO:0097237	cellular response to toxic substance	BP	1	108	41	15836	TR3180_c6_g1	0.244919	0.482263	0.00925926
GO:0005488	binding	MF	19	6341	41	15836	TR35533_c0_g1,TR99728_c0_g1,TR3263_c3_g1,TR22233_c0_g1,TR42615_c0_g1,TR33502_c1_g3,TR65448_c0_g1,TR77467_c0_g2,TR17775_c0_g2,TR156193_c0_g1,TR52454_c2_g1,TR2468_c0_g1,TR2520_c8_g1,TR1673_c1_g1,TR3180_c6_g1,TR55629_c0_g1,TR143_c0_g2,TR11823_c0_g1,TR70035_c0_g2	0.25144	0.491067	0.00299637
GO:0032559	adenyl ribonucleotide binding	MF	5	1316	41	15836	TR156193_c0_g1,TR17775_c0_g2,TR52454_c2_g1,TR2468_c0_g1,TR2520_c8_g1	0.251961	0.491067	0.00379939
GO:0030554	adenyl nucleotide binding	MF	5	1319	41	15836	TR156193_c0_g1,TR17775_c0_g2,TR52454_c2_g1,TR2468_c0_g1,TR2520_c8_g1	0.253454	0.491412	0.00379075
GO:0003746	translation elongation factor activity	MF	1	113	41	15836	TR65448_c0_g1	0.254711	0.491412	0.00884956
GO:0005509	calcium ion binding	MF	1	116	41	15836	TR3263_c3_g1	0.260526	0.500106	0.00862069
GO:0016209	antioxidant activity	MF	1	117	41	15836	TR3180_c6_g1	0.262455	0.501289	0.00854701
GO:0042273	ribosomal large subunit biogenesis	BP	1	123	41	15836	TR20991_c0_g1	0.273924	0.519028	0.00813008
GO:0009165	nucleotide biosynthetic process	BP	2	398	41	15836	TR17775_c0_g2,TR2468_c0_g1	0.275563	0.519028	0.00502513
GO:0009636	response to toxic substance	BP	1	124	41	15836	TR3180_c6_g1	0.275819	0.519028	0.00806452
GO:1901293	nucleoside phosphate biosynthetic process	BP	2	401	41	15836	TR17775_c0_g2,TR2468_c0_g1	0.27846	0.52143	0.00498753
GO:0006979	response to oxidative stress	BP	1	128	41	15836	TR3180_c6_g1	0.283349	0.527996	0.0078125
GO:0004674	protein serine/threonine kinase activity	MF	1	129	41	15836	TR35533_c0_g1	0.285219	0.528902	0.00775194
GO:0022411	cellular component disassembly	BP	1	132	41	15836	TR65448_c0_g1	0.290803	0.53665	0.00757576
GO:0005739	mitochondrion	CC	4	1061	41	15836	TR43707_c0_g1,TR46620_c0_g3,TR9241_c0_g2,TR9894_c0_g1	0.294118	0.54016	0.00377003
GO:0022627	cytosolic small ribosomal subunit	CC	1	141	41	15836	TR11823_c0_g1	0.307298	0.561664	0.0070922
GO:0044281	small molecule metabolic process	BP	6	1785	41	15836	TR17775_c0_g2,TR2468_c0_g1,TR99728_c0_g1,TR123983_c0_g1,TR143_c0_g2,TR9241_c0_g2	0.31357	0.563102	0.00336134
GO:0006091	generation of precursor metabolites and energy	BP	2	438	41	15836	TR143_c0_g2,TR9241_c0_g2	0.314118	0.563102	0.00456621
GO:0003743	translation initiation factor activity	MF	1	145	41	15836	TR65448_c0_g1	0.314508	0.563102	0.00689655
GO:0009605	response to external stimulus	BP	1	146	41	15836	TR35533_c0_g1	0.3163	0.563102	0.00684932
GO:0006812	cation transport	BP	2	441	41	15836	TR17775_c0_g2,TR2468_c0_g1	0.316999	0.563102	0.00453515
GO:0019843	rRNA binding	MF	1	147	41	15836	TR11823_c0_g1	0.318086	0.563102	0.00680272
GO:0006397	mRNA processing	BP	1	148	41	15836	TR46620_c0_g3	0.319868	0.563102	0.00675676
GO:0034622	cellular protein-containing complex assembly	BP	2	444	41	15836	TR20991_c0_g1,TR33502_c1_g3	0.319877	0.563102	0.0045045
GO:0019842	vitamin binding	MF	1	149	41	15836	TR55629_c0_g1	0.321646	0.563618	0.00671141
GO:0006396	RNA processing	BP	2	451	41	15836	TR46620_c0_g3,TR60505_c0_g1	0.326583	0.569656	0.00443459
GO:0044877	protein-containing complex binding	MF	1	154	41	15836	TR65448_c0_g1	0.330465	0.573808	0.00649351
GO:1901137	carbohydrate derivative biosynthetic process	BP	2	458	41	15836	TR17775_c0_g2,TR2468_c0_g1	0.333274	0.576066	0.00436681
GO:0016887	ATPase activity	MF	2	463	41	15836	TR2468_c0_g1,TR17775_c0_g2	0.338043	0.581678	0.00431965
GO:0070925	organelle assembly	BP	1	160	41	15836	TR20991_c0_g1	0.340902	0.582356	0.00625
GO:0090407	organophosphate biosynthetic process	BP	2	469	41	15836	TR17775_c0_g2,TR2468_c0_g1	0.343755	0.582356	0.00426439
GO:0003676	nucleic acid binding	MF	5	1494	41	15836	TR22233_c0_g1,TR42615_c0_g1,TR33502_c1_g3,TR65448_c0_g1,TR11823_c0_g1	0.343866	0.582356	0.00334672
GO:0015318	inorganic molecular entity transmembrane transporter activity	MF	2	470	41	15836	TR2468_c0_g1,TR17775_c0_g2	0.344705	0.582356	0.00425532
GO:0020037	heme binding	MF	1	163	41	15836	TR3180_c6_g1	0.34606	0.582356	0.00613497
GO:0034220	ion transmembrane transport	BP	2	474	41	15836	TR17775_c0_g2,TR2468_c0_g1	0.348503	0.58297	0.00421941
GO:0006417	regulation of translation	BP	1	165	41	15836	TR65448_c0_g1	0.349477	0.58297	0.00606061
GO:0006725	cellular aromatic compound metabolic process	BP	7	2237	41	15836	TR60505_c0_g1,TR46620_c0_g3,TR17775_c0_g2,TR2468_c0_g1,TR143_c0_g2,TR9241_c0_g2,TR99728_c0_g1	0.357239	0.589814	0.00312919
GO:0065003	protein-containing complex assembly	BP	2	484	41	15836	TR20991_c0_g1,TR33502_c1_g3	0.35797	0.589814	0.00413223
GO:0002181	cytoplasmic translation	BP	1	172	41	15836	TR20991_c0_g1	0.3613	0.589814	0.00581395
GO:0034248	regulation of cellular amide metabolic process	BP	1	172	41	15836	TR65448_c0_g1	0.3613	0.589814	0.00581395
GO:0016469	proton-transporting two-sector ATPase complex	CC	1	172	41	15836	TR2468_c0_g1	0.3613	0.589814	0.00581395
GO:0032270	positive regulation of cellular protein metabolic process	BP	1	173	41	15836	TR65448_c0_g1	0.362972	0.590022	0.00578035
GO:0015075	ion transmembrane transporter activity	MF	2	491	41	15836	TR2468_c0_g1,TR17775_c0_g2	0.36457	0.590109	0.00407332
GO:0010608	posttranscriptional regulation of gene expression	BP	1	176	41	15836	TR65448_c0_g1	0.367961	0.593085	0.00568182
GO:1901363	heterocyclic compound binding	MF	12	4110	41	15836	TR22233_c0_g1,TR42615_c0_g1,TR33502_c1_g3,TR65448_c0_g1,TR156193_c0_g1,TR17775_c0_g2,TR52454_c2_g1,TR2468_c0_g1,TR2520_c8_g1,TR3180_c6_g1,TR55629_c0_g1,TR11823_c0_g1	0.37001	0.593881	0.00291971
GO:0097159	organic cyclic compound binding	MF	12	4116	41	15836	TR22233_c0_g1,TR42615_c0_g1,TR33502_c1_g3,TR65448_c0_g1,TR156193_c0_g1,TR17775_c0_g2,TR52454_c2_g1,TR2468_c0_g1,TR2520_c8_g1,TR3180_c6_g1,TR55629_c0_g1,TR11823_c0_g1	0.372137	0.594796	0.00291545
GO:0051247	positive regulation of protein metabolic process	BP	1	181	41	15836	TR65448_c0_g1	0.376193	0.598774	0.00552486
GO:1901360	organic cyclic compound metabolic process	BP	7	2289	41	15836	TR60505_c0_g1,TR46620_c0_g3,TR17775_c0_g2,TR2468_c0_g1,TR143_c0_g2,TR9241_c0_g2,TR99728_c0_g1	0.380522	0.601542	0.0030581
GO:0051130	positive regulation of cellular component organization	BP	1	184	41	15836	TR65448_c0_g1	0.381082	0.601542	0.00543478
GO:0016798	hydrolase activity, acting on glycosyl bonds	MF	1	191	41	15836	TR499_c0_g2	0.392344	0.616771	0.0052356
GO:0046906	tetrapyrrole binding	MF	1	194	41	15836	TR3180_c6_g1	0.397109	0.619988	0.00515464
GO:0048037	cofactor binding	MF	3	877	41	15836	TR3180_c6_g1,TR55629_c0_g1,TR143_c0_g2	0.398239	0.619988	0.00342075
GO:0006796	phosphate-containing compound metabolic process	BP	4	1236	41	15836	TR17775_c0_g2,TR2468_c0_g1,TR143_c0_g2,TR9241_c0_g2	0.399259	0.619988	0.00323625
GO:0010557	positive regulation of macromolecule biosynthetic process	BP	1	198	41	15836	TR65448_c0_g1	0.403406	0.623891	0.00505051
GO:0006413	translational initiation	BP	1	200	41	15836	TR65448_c0_g1	0.40653	0.626187	0.005
GO:0005575	cellular_component	CC	27	9944	41	15836	TR35533_c0_g1,TR169525_c0_g2,TR23303_c0_g1,TR31443_c0_g4,TR70654_c0_g1,TR77467_c0_g2,TR69912_c0_g2,TR7729_c0_g1,TR77710_c0_g1,TR20992_c0_g1,TR28841_c0_g1,TR77589_c1_g4,TR42615_c0_g1,TR43707_c0_g1,TR143_c0_g2,TR17775_c0_g2,TR9241_c0_g2,TR46620_c0_g3,TR9894_c0_g1,TR60505_c0_g1,TR1106_c3_g1,TR11823_c0_g1,TR123983_c0_g1,TR99728_c0_g1,TR2468_c0_g1,TR20991_c0_g1,TR33502_c1_g3	0.408838	0.627214	0.00271521
GO:0006793	phosphorus metabolic process	BP	4	1256	41	15836	TR17775_c0_g2,TR2468_c0_g1,TR143_c0_g2,TR9241_c0_g2	0.411288	0.628449	0.00318471
GO:0031328	positive regulation of cellular biosynthetic process	BP	1	205	41	15836	TR65448_c0_g1	0.414271	0.630484	0.00487805
GO:0009891	positive regulation of biosynthetic process	BP	1	208	41	15836	TR65448_c0_g1	0.418868	0.632442	0.00480769
GO:0016071	mRNA metabolic process	BP	1	208	41	15836	TR46620_c0_g3	0.418868	0.632442	0.00480769
GO:0035639	purine ribonucleoside triphosphate binding	MF	5	1648	41	15836	TR156193_c0_g1,TR17775_c0_g2,TR52454_c2_g1,TR2468_c0_g1,TR2520_c8_g1	0.425901	0.64002	0.00303398
GO:0022613	ribonucleoprotein complex biogenesis	BP	2	560	41	15836	TR20991_c0_g1,TR33502_c1_g3	0.42819	0.64002	0.00357143
GO:0010628	positive regulation of gene expression	BP	1	217	41	15836	TR65448_c0_g1	0.43245	0.64002	0.00460829
GO:0016746	transferase activity, transferring acyl groups	MF	1	218	41	15836	TR123983_c0_g1	0.43394	0.64002	0.00458716
GO:0031410	cytoplasmic vesicle	CC	1	218	41	15836	TR35533_c0_g1	0.43394	0.64002	0.00458716
GO:0097708	intracellular vesicle	CC	1	218	41	15836	TR35533_c0_g1	0.43394	0.64002	0.00458716
GO:0032555	purine ribonucleotide binding	MF	5	1672	41	15836	TR156193_c0_g1,TR17775_c0_g2,TR52454_c2_g1,TR2468_c0_g1,TR2520_c8_g1	0.438646	0.641022	0.00299043
GO:0005730	nucleolus	CC	1	222	41	15836	TR11823_c0_g1	0.439861	0.641022	0.0045045
GO:0017076	purine nucleotide binding	MF	5	1677	41	15836	TR156193_c0_g1,TR17775_c0_g2,TR52454_c2_g1,TR2468_c0_g1,TR2520_c8_g1	0.441295	0.641022	0.00298151
GO:0004672	protein kinase activity	MF	1	223	41	15836	TR35533_c0_g1	0.441332	0.641022	0.0044843
GO:0051704	multi-organism process	BP	1	225	41	15836	TR35533_c0_g1	0.444262	0.642834	0.00444444
GO:0006139	nucleobase-containing compound metabolic process	BP	6	2084	41	15836	TR60505_c0_g1,TR46620_c0_g3,TR17775_c0_g2,TR2468_c0_g1,TR143_c0_g2,TR9241_c0_g2	0.457888	0.66005	0.00287908
GO:0032553	ribonucleotide binding	MF	5	1738	41	15836	TR156193_c0_g1,TR17775_c0_g2,TR52454_c2_g1,TR2468_c0_g1,TR2520_c8_g1	0.473423	0.679879	0.00287687
GO:1901607	alpha-amino acid biosynthetic process	BP	1	249	41	15836	TR123983_c0_g1	0.478278	0.684278	0.00401606
GO:0043168	anion binding	MF	6	2140	41	15836	TR156193_c0_g1,TR17775_c0_g2,TR52454_c2_g1,TR2468_c0_g1,TR2520_c8_g1,TR55629_c0_g1	0.484772	0.68643	0.00280374
GO:0022607	cellular component assembly	BP	2	625	41	15836	TR20991_c0_g1,TR33502_c1_g3	0.48515	0.68643	0.0032
GO:0005215	transporter activity	MF	3	1002	41	15836	TR2468_c0_g1,TR17775_c0_g2,TR43707_c0_g1	0.485173	0.68643	0.00299401
GO:0044446	intracellular organelle part	CC	7	2550	41	15836	TR42615_c0_g1,TR11823_c0_g1,TR20991_c0_g1,TR33502_c1_g3,TR43707_c0_g1,TR143_c0_g2,TR2468_c0_g1	0.497808	0.699914	0.0027451
GO:0097367	carbohydrate derivative binding	MF	5	1786	41	15836	TR156193_c0_g1,TR17775_c0_g2,TR52454_c2_g1,TR2468_c0_g1,TR2520_c8_g1	0.498368	0.699914	0.00279955
GO:0044422	organelle part	CC	7	2564	41	15836	TR43707_c0_g1,TR20991_c0_g1,TR33502_c1_g3,TR11823_c0_g1,TR42615_c0_g1,TR143_c0_g2,TR2468_c0_g1	0.504004	0.705237	0.00273011
GO:0008135	translation factor activity, RNA binding	MF	1	279	41	15836	TR65448_c0_g1	0.517952	0.721392	0.00358423
GO:0006811	ion transport	BP	2	666	41	15836	TR17775_c0_g2,TR2468_c0_g1	0.519327	0.721392	0.003003
GO:0046483	heterocycle metabolic process	BP	6	2236	41	15836	TR60505_c0_g1,TR46620_c0_g3,TR17775_c0_g2,TR2468_c0_g1,TR143_c0_g2,TR9241_c0_g2	0.530041	0.732725	0.00268336
GO:0043227	membrane-bounded organelle	CC	10	3786	41	15836	TR46620_c0_g3,TR9241_c0_g2,TR9894_c0_g1,TR60505_c0_g1,TR1106_c3_g1,TR35533_c0_g1,TR43707_c0_g1,TR11823_c0_g1,TR143_c0_g2,TR2468_c0_g1	0.531321	0.732725	0.00264131
GO:0016310	phosphorylation	BP	2	687	41	15836	TR143_c0_g2,TR9241_c0_g2	0.536268	0.736886	0.00291121
GO:0005515	protein binding	MF	3	1096	41	15836	TR1673_c1_g1,TR35533_c0_g1,TR99728_c0_g1	0.546796	0.74866	0.00273723
GO:0051173	positive regulation of nitrogen compound metabolic process	BP	1	308	41	15836	TR65448_c0_g1	0.553497	0.755128	0.00324675
GO:0016773	phosphotransferase activity, alcohol group as acceptor	MF	1	311	41	15836	TR35533_c0_g1	0.557025	0.757236	0.00321543
GO:0016829	lyase activity	MF	1	317	41	15836	TR99728_c0_g1	0.563999	0.763254	0.00315457
GO:0010604	positive regulation of macromolecule metabolic process	BP	1	319	41	15836	TR65448_c0_g1	0.5663	0.763254	0.0031348
GO:0008652	cellular amino acid biosynthetic process	BP	1	320	41	15836	TR123983_c0_g1	0.567446	0.763254	0.003125
GO:0005829	cytosol	CC	4	1545	41	15836	TR20991_c0_g1,TR33502_c1_g3,TR11823_c0_g1,TR123983_c0_g1	0.576856	0.771516	0.002589
GO:0005743	mitochondrial inner membrane	CC	1	329	41	15836	TR43707_c0_g1	0.577627	0.771516	0.00303951
GO:0031325	positive regulation of cellular metabolic process	BP	1	333	41	15836	TR65448_c0_g1	0.582077	0.77206	0.003003
GO:0019866	organelle inner membrane	CC	1	333	41	15836	TR43707_c0_g1	0.582077	0.77206	0.003003
GO:0055085	transmembrane transport	BP	3	1158	41	15836	TR17775_c0_g2,TR2468_c0_g1,TR43707_c0_g1	0.585179	0.773489	0.00259067
GO:0022857	transmembrane transporter activity	MF	2	765	41	15836	TR2468_c0_g1,TR17775_c0_g2	0.595695	0.780114	0.00261438
GO:0070887	cellular response to chemical stimulus	BP	1	347	41	15836	TR3180_c6_g1	0.597293	0.780114	0.00288184
GO:0009893	positive regulation of metabolic process	BP	1	348	41	15836	TR65448_c0_g1	0.598359	0.780114	0.00287356
GO:1901605	alpha-amino acid metabolic process	BP	1	348	41	15836	TR123983_c0_g1	0.598359	0.780114	0.00287356
GO:0055114	oxidation-reduction process	BP	4	1591	41	15836	TR143_c0_g2,TR9241_c0_g2,TR49662_c0_g1,TR3180_c6_g1	0.600993	0.780882	0.00251414
GO:0050896	response to stimulus	BP	3	1199	41	15836	TR99728_c0_g1,TR35533_c0_g1,TR3180_c6_g1	0.609471	0.787112	0.00250209
GO:0032268	regulation of cellular protein metabolic process	BP	1	361	41	15836	TR65448_c0_g1	0.611969	0.787112	0.00277008
GO:0051128	regulation of cellular component organization	BP	1	361	41	15836	TR65448_c0_g1	0.611969	0.787112	0.00277008
GO:0009057	macromolecule catabolic process	BP	1	366	41	15836	TR499_c0_g2	0.617083	0.790122	0.00273224
GO:0017111	nucleoside-triphosphatase activity	MF	2	797	41	15836	TR2468_c0_g1,TR17775_c0_g2	0.618446	0.790122	0.00250941
GO:0043231	intracellular membrane-bounded organelle	CC	9	3672	41	15836	TR46620_c0_g3,TR9241_c0_g2,TR9894_c0_g1,TR60505_c0_g1,TR1106_c3_g1,TR43707_c0_g1,TR11823_c0_g1,TR143_c0_g2,TR2468_c0_g1	0.634276	0.804375	0.00245098
GO:0051246	regulation of protein metabolic process	BP	1	386	41	15836	TR65448_c0_g1	0.636889	0.804375	0.00259067
GO:0016740	transferase activity	MF	4	1667	41	15836	TR123983_c0_g1,TR35533_c0_g1,TR55629_c0_g1,TR12547_c0_g1	0.639146	0.804375	0.00239952
GO:0016462	pyrophosphatase activity	MF	2	829	41	15836	TR2468_c0_g1,TR17775_c0_g2	0.640242	0.804375	0.00241255
GO:0016818	hydrolase activity, acting on acid anhydrides, in phosphorus-containing anhydrides	MF	2	829	41	15836	TR2468_c0_g1,TR17775_c0_g2	0.640242	0.804375	0.00241255
GO:0016817	hydrolase activity, acting on acid anhydrides	MF	2	832	41	15836	TR2468_c0_g1,TR17775_c0_g2	0.642236	0.804375	0.00240385
GO:0031966	mitochondrial membrane	CC	1	406	41	15836	TR43707_c0_g1	0.655694	0.818546	0.00246305
GO:0003677	DNA binding	MF	1	413	41	15836	TR22233_c0_g1	0.662048	0.823786	0.00242131
GO:0031982	vesicle	CC	1	434	41	15836	TR35533_c0_g1	0.680433	0.843683	0.00230415
GO:0016043	cellular component organization	BP	3	1335	41	15836	TR20991_c0_g1,TR33502_c1_g3,TR65448_c0_g1	0.68343	0.843683	0.00224719
GO:0016301	kinase activity	MF	1	439	41	15836	TR35533_c0_g1	0.684664	0.843683	0.0022779
GO:0005740	mitochondrial envelope	CC	1	442	41	15836	TR43707_c0_g1	0.687177	0.844057	0.00226244
GO:0042254	ribosome biogenesis	BP	1	455	41	15836	TR20991_c0_g1	0.697841	0.854408	0.0021978
GO:0051716	cellular response to stimulus	BP	2	946	41	15836	TR35533_c0_g1,TR3180_c6_g1	0.711918	0.868858	0.00211416
GO:0042221	response to chemical	BP	1	486	41	15836	TR3180_c6_g1	0.721859	0.878185	0.00205761
GO:0043167	ion binding	MF	8	3551	41	15836	TR3263_c3_g1,TR77467_c0_g2,TR17775_c0_g2,TR156193_c0_g1,TR52454_c2_g1,TR2468_c0_g1,TR2520_c8_g1,TR55629_c0_g1	0.730079	0.885366	0.00225289
GO:0048522	positive regulation of cellular process	BP	1	501	41	15836	TR65448_c0_g1	0.732802	0.885855	0.00199601
GO:0031981	nuclear lumen	CC	1	514	41	15836	TR11823_c0_g1	0.741945	0.889872	0.00194553
GO:0044085	cellular component biogenesis	BP	2	1004	41	15836	TR20991_c0_g1,TR33502_c1_g3	0.74295	0.889872	0.00199203
GO:0036094	small molecule binding	MF	6	2767	41	15836	TR156193_c0_g1,TR17775_c0_g2,TR52454_c2_g1,TR2468_c0_g1,TR2520_c8_g1,TR55629_c0_g1	0.745359	0.889872	0.00216841
GO:0048518	positive regulation of biological process	BP	1	528	41	15836	TR65448_c0_g1	0.75145	0.889872	0.00189394
GO:0050662	coenzyme binding	MF	1	528	41	15836	TR55629_c0_g1	0.75145	0.889872	0.00189394
GO:0005975	carbohydrate metabolic process	BP	1	529	41	15836	TR499_c0_g2	0.752115	0.889872	0.00189036
GO:0098796	membrane protein complex	CC	1	530	41	15836	TR2468_c0_g1	0.752779	0.889872	0.00188679
GO:0007165	signal transduction	BP	1	533	41	15836	TR35533_c0_g1	0.754761	0.889872	0.00187617
GO:0023052	signaling	BP	1	544	41	15836	TR35533_c0_g1	0.761895	0.895519	0.00183824
GO:0016053	organic acid biosynthetic process	BP	1	564	41	15836	TR123983_c0_g1	0.77435	0.903945	0.00177305
GO:0046394	carboxylic acid biosynthetic process	BP	1	564	41	15836	TR123983_c0_g1	0.77435	0.903945	0.00177305
GO:0007154	cell communication	BP	1	567	41	15836	TR35533_c0_g1	0.776163	0.903945	0.00176367
GO:0044429	mitochondrial part	CC	1	576	41	15836	TR43707_c0_g1	0.781516	0.904745	0.00173611
GO:0016491	oxidoreductase activity	MF	4	2009	41	15836	TR49662_c0_g1,TR3180_c6_g1,TR143_c0_g2,TR9241_c0_g2	0.781586	0.904745	0.00199104
GO:0019752	carboxylic acid metabolic process	BP	2	1097	41	15836	TR123983_c0_g1,TR99728_c0_g1	0.786912	0.908158	0.00182315
GO:0006520	cellular amino acid metabolic process	BP	1	591	41	15836	TR123983_c0_g1	0.790161	0.909161	0.00169205
GO:0043436	oxoacid metabolic process	BP	2	1112	41	15836	TR99728_c0_g1,TR123983_c0_g1	0.793371	0.909483	0.00179856
GO:0006082	organic acid metabolic process	BP	2	1118	41	15836	TR99728_c0_g1,TR123983_c0_g1	0.795907	0.909483	0.00178891
GO:0034654	nucleobase-containing compound biosynthetic process	BP	2	1122	41	15836	TR17775_c0_g2,TR2468_c0_g1	0.797583	0.909483	0.00178253
GO:0046872	metal ion binding	MF	3	1615	41	15836	TR3263_c3_g1,TR77467_c0_g2,TR17775_c0_g2	0.80311	0.91306	0.00185759
GO:0016772	transferase activity, transferring phosphorus-containing groups	MF	1	632	41	15836	TR35533_c0_g1	0.812124	0.914059	0.00158228
GO:0043169	cation binding	MF	3	1642	41	15836	TR3263_c3_g1,TR77467_c0_g2,TR17775_c0_g2	0.812441	0.914059	0.00182704
GO:0000166	nucleotide binding	MF	5	2582	41	15836	TR156193_c0_g1,TR17775_c0_g2,TR52454_c2_g1,TR2468_c0_g1,TR2520_c8_g1	0.821027	0.914059	0.00193648
GO:1901265	nucleoside phosphate binding	MF	5	2582	41	15836	TR156193_c0_g1,TR17775_c0_g2,TR52454_c2_g1,TR2468_c0_g1,TR2520_c8_g1	0.821027	0.914059	0.00193648
GO:0031967	organelle envelope	CC	1	652	41	15836	TR43707_c0_g1	0.822008	0.914059	0.00153374
GO:0031975	envelope	CC	1	653	41	15836	TR43707_c0_g1	0.822488	0.914059	0.00153139
GO:0071840	cellular component organization or biogenesis	BP	3	1681	41	15836	TR20991_c0_g1,TR33502_c1_g3,TR65448_c0_g1	0.825284	0.914059	0.00178465
GO:1901575	organic substance catabolic process	BP	1	660	41	15836	TR499_c0_g2	0.825817	0.914059	0.00151515
GO:0016787	hydrolase activity	MF	4	2163	41	15836	TR2468_c0_g1,TR17775_c0_g2,TR499_c0_g2,TR219280_c0_g1	0.83	0.914059	0.00184928
GO:2000112	regulation of cellular macromolecule biosynthetic process	BP	1	670	41	15836	TR65448_c0_g1	0.830468	0.914059	0.00149254
GO:0016021	integral component of membrane	CC	4	2166	41	15836	TR143_c0_g2,TR17775_c0_g2,TR43707_c0_g1,TR9241_c0_g2	0.830851	0.914059	0.00184672
GO:0010556	regulation of macromolecule biosynthetic process	BP	1	675	41	15836	TR65448_c0_g1	0.832747	0.914059	0.00148148
GO:0031224	intrinsic component of membrane	CC	4	2182	41	15836	TR143_c0_g2,TR17775_c0_g2,TR43707_c0_g1,TR9241_c0_g2	0.835337	0.914059	0.00183318
GO:0019438	aromatic compound biosynthetic process	BP	2	1235	41	15836	TR17775_c0_g2,TR2468_c0_g1	0.840285	0.914059	0.00161943
GO:0031326	regulation of cellular biosynthetic process	BP	1	694	41	15836	TR65448_c0_g1	0.84114	0.914059	0.00144092
GO:0009889	regulation of biosynthetic process	BP	1	699	41	15836	TR65448_c0_g1	0.843279	0.914059	0.00143062
GO:0044283	small molecule biosynthetic process	BP	1	705	41	15836	TR123983_c0_g1	0.845809	0.914059	0.00141844
GO:0031090	organelle membrane	CC	1	708	41	15836	TR43707_c0_g1	0.847059	0.914059	0.00141243
GO:0018130	heterocycle biosynthetic process	BP	2	1273	41	15836	TR17775_c0_g2,TR2468_c0_g1	0.852761	0.915514	0.00157109
GO:0010468	regulation of gene expression	BP	1	725	41	15836	TR65448_c0_g1	0.853959	0.915514	0.00137931
GO:0016070	RNA metabolic process	BP	2	1290	41	15836	TR60505_c0_g1,TR46620_c0_g3	0.858058	0.915514	0.00155039
GO:1901362	organic cyclic compound biosynthetic process	BP	2	1306	41	15836	TR17775_c0_g2,TR2468_c0_g1	0.86289	0.915514	0.00153139
GO:0070013	intracellular organelle lumen	CC	1	755	41	15836	TR11823_c0_g1	0.865401	0.915514	0.0013245
GO:0031974	membrane-enclosed lumen	CC	1	757	41	15836	TR11823_c0_g1	0.866132	0.915514	0.001321
GO:0043233	organelle lumen	CC	1	757	41	15836	TR11823_c0_g1	0.866132	0.915514	0.001321
GO:0009056	catabolic process	BP	1	761	41	15836	TR499_c0_g2	0.867582	0.915514	0.00131406
GO:0044425	membrane part	CC	5	2791	41	15836	TR143_c0_g2,TR17775_c0_g2,TR43707_c0_g1,TR9241_c0_g2,TR2468_c0_g1	0.871874	0.91751	0.00179147
GO:0140096	catalytic activity, acting on a protein	MF	1	787	41	15836	TR35533_c0_g1	0.876641	0.919992	0.00127065
GO:0044428	nuclear part	CC	1	810	41	15836	TR11823_c0_g1	0.884149	0.925329	0.00123457
GO:0090304	nucleic acid metabolic process	BP	2	1425	41	15836	TR60505_c0_g1,TR46620_c0_g3	0.894467	0.930905	0.00140351
GO:0012505	endomembrane system	CC	1	858	41	15836	TR35533_c0_g1	0.89841	0.930905	0.0011655
GO:0051171	regulation of nitrogen compound metabolic process	BP	1	863	41	15836	TR65448_c0_g1	0.899793	0.930905	0.00115875
GO:0006996	organelle organization	BP	1	875	41	15836	TR20991_c0_g1	0.903038	0.930905	0.00114286
GO:0050794	regulation of cellular process	BP	2	1470	41	15836	TR35533_c0_g1,TR65448_c0_g1	0.904591	0.930905	0.00136054
GO:0080090	regulation of primary metabolic process	BP	1	887	41	15836	TR65448_c0_g1	0.90618	0.930905	0.0011274
GO:0031323	regulation of cellular metabolic process	BP	1	892	41	15836	TR65448_c0_g1	0.90746	0.930905	0.00112108
GO:0060255	regulation of macromolecule metabolic process	BP	1	898	41	15836	TR65448_c0_g1	0.908973	0.930905	0.00111359
GO:0019222	regulation of metabolic process	BP	1	946	41	15836	TR65448_c0_g1	0.92024	0.937808	0.00105708
GO:0050789	regulation of biological process	BP	2	1551	41	15836	TR35533_c0_g1,TR65448_c0_g1	0.920623	0.937808	0.00128949
GO:0065007	biological regulation	BP	2	1803	41	15836	TR35533_c0_g1,TR65448_c0_g1	0.956049	0.971305	0.00110926
GO:0006810	transport	BP	3	2452	41	15836	TR17775_c0_g2,TR2468_c0_g1,TR43707_c0_g1	0.963756	0.973908	0.00122349
GO:0003824	catalytic activity	MF	13	7030	41	15836	TR2468_c0_g1,TR123983_c0_g1,TR49662_c0_g1,TR3180_c6_g1,TR35533_c0_g1,TR143_c0_g2,TR9241_c0_g2,TR55629_c0_g1,TR17775_c0_g2,TR12547_c0_g1,TR219280_c0_g1,TR499_c0_g2,TR99728_c0_g1	0.965358	0.973908	0.00184922
GO:0051234	establishment of localization	BP	3	2484	41	15836	TR17775_c0_g2,TR2468_c0_g1,TR43707_c0_g1	0.96626	0.973908	0.00120773
GO:0051179	localization	BP	3	2624	41	15836	TR17775_c0_g2,TR2468_c0_g1,TR43707_c0_g1	0.975462	0.980596	0.00114329
GO:0016020	membrane	CC	6	4744	41	15836	TR43707_c0_g1,TR143_c0_g2,TR2468_c0_g1,TR17775_c0_g2,TR9241_c0_g2,TR35533_c0_g1	0.993147	0.994676	0.00126476
GO:0005634	nucleus	CC	1	1896	41	15836	TR11823_c0_g1	0.994676	0.994676	0.000527426

## Sheet: DOWN
Class	GO_Name	GO_ID	Pvalue	EnrichmentScore	Test	Ref	TestAll	RefAll	geneID	FDR
Biological process	anthocyanin-containing compound biosynthetic process	GO:0009718	0.000820914	1	1	1	13	15836	TR2946_c0_g1	0.027972
Biological process	glycoside metabolic process	GO:0016137	0.000820914	1	1	1	13	15836	TR2946_c0_g1	0.027972
Biological process	glycoside biosynthetic process	GO:0016138	0.000820914	1	1	1	13	15836	TR2946_c0_g1	0.027972
Biological process	cyanidin 3-O-glucoside biosynthetic process	GO:0033485	0.000820914	1	1	1	13	15836	TR2946_c0_g1	0.027972
Biological process	delphinidin 3-O-glucoside biosynthetic process	GO:0033486	0.000820914	1	1	1	13	15836	TR2946_c0_g1	0.027972
Biological process	anthocyanin-containing compound metabolic process	GO:0046283	0.000820914	1	1	1	13	15836	TR2946_c0_g1	0.027972
Biological process	cyanidin 3-O-glucoside metabolic process	GO:1901038	0.000820914	1	1	1	13	15836	TR2946_c0_g1	0.027972
Biological process	beta-glucoside metabolic process	GO:1901804	0.000820914	1	1	1	13	15836	TR2946_c0_g1	0.027972
Biological process	beta-glucoside biosynthetic process	GO:1901806	0.000820914	1	1	1	13	15836	TR2946_c0_g1	0.027972
Molecular Function	transferase activity, transferring alkyl or aryl (other than methyl) groups	GO:0016765	0.00103669	0.0338983	2	59	13	15836	TR6811_c0_g1,TR639_c1_g1	0.027972
Biological process	flavonoid metabolic process	GO:0009812	0.00164121	0.5	1	2	13	15836	TR2946_c0_g1	0.027972
Biological process	flavonoid biosynthetic process	GO:0009813	0.00164121	0.5	1	2	13	15836	TR2946_c0_g1	0.027972
Biological process	senescence-associated heterochromatin focus assembly	GO:0035986	0.00164121	0.5	1	2	13	15836	TR159997_c0_g1	0.027972
Biological process	positive regulation of cell aging	GO:0090343	0.00164121	0.5	1	2	13	15836	TR159997_c0_g1	0.027972
Biological process	oncogene-induced cell senescence	GO:0090402	0.00164121	0.5	1	2	13	15836	TR159997_c0_g1	0.027972
Biological process	regulation of cellular senescence	GO:2000772	0.00164121	0.5	1	2	13	15836	TR159997_c0_g1	0.027972
Biological process	positive regulation of cellular senescence	GO:2000774	0.00164121	0.5	1	2	13	15836	TR159997_c0_g1	0.027972
Molecular Function	distal enhancer DNA-binding transcription activator activity, RNA polymerase II-specific	GO:0001205	0.00164121	0.5	1	2	13	15836	TR159997_c0_g1	0.027972
Molecular Function	peroxisome proliferator activated receptor binding	GO:0042975	0.00164121	0.5	1	2	13	15836	TR159997_c0_g1	0.027972
Cellular Component	senescence-associated heterochromatin focus	GO:0035985	0.00164121	0.5	1	2	13	15836	TR159997_c0_g1	0.027972
Biological process	viral latency	GO:0019042	0.00246088	0.333333	1	3	13	15836	TR159997_c0_g1	0.027972
Biological process	establishment of viral latency	GO:0019043	0.00246088	0.333333	1	3	13	15836	TR159997_c0_g1	0.027972
Biological process	heterochromatin assembly	GO:0031507	0.00246088	0.333333	1	3	13	15836	TR159997_c0_g1	0.027972
Biological process	pigmentation	GO:0043473	0.00246088	0.333333	1	3	13	15836	TR2946_c0_g1	0.027972
Biological process	establishment of integrated proviral latency	GO:0075713	0.00246088	0.333333	1	3	13	15836	TR159997_c0_g1	0.027972
Biological process	regulation of cell aging	GO:0090342	0.00246088	0.333333	1	3	13	15836	TR159997_c0_g1	0.027972
Biological process	cellular senescence	GO:0090398	0.00246088	0.333333	1	3	13	15836	TR159997_c0_g1	0.027972
Molecular Function	AT DNA binding	GO:0003680	0.00246088	0.333333	1	3	13	15836	TR159997_c0_g1	0.027972
Molecular Function	retinoid X receptor binding	GO:0046965	0.00246088	0.333333	1	3	13	15836	TR159997_c0_g1	0.027972
Molecular Function	5'-deoxyribose-5-phosphate lyase activity	GO:0051575	0.00246088	0.333333	1	3	13	15836	TR159997_c0_g1	0.027972
Biological process	DNA unwinding involved in DNA replication	GO:0006268	0.00327993	0.25	1	4	13	15836	TR159997_c0_g1	0.0310682
Biological process	nucleosome disassembly	GO:0006337	0.00327993	0.25	1	4	13	15836	TR159997_c0_g1	0.0310682
Biological process	protein-DNA complex disassembly	GO:0032986	0.00327993	0.25	1	4	13	15836	TR159997_c0_g1	0.0310682
Biological process	heterochromatin organization	GO:0070828	0.00327993	0.25	1	4	13	15836	TR159997_c0_g1	0.0310682
Molecular Function	transcription factor activity, RNA polymerase II distal enhancer sequence-specific binding	GO:0003705	0.00327993	0.25	1	4	13	15836	TR159997_c0_g1	0.0310682
Molecular Function	retinoic acid receptor binding	GO:0042974	0.00327993	0.25	1	4	13	15836	TR159997_c0_g1	0.0310682
Biological process	base-excision repair	GO:0006284	0.00409835	0.2	1	5	13	15836	TR159997_c0_g1	0.0349385
Biological process	negative regulation of chromatin silencing	GO:0031936	0.00409835	0.2	1	5	13	15836	TR159997_c0_g1	0.0349385
Molecular Function	DNA-(apurinic or apyrimidinic site) endonuclease activity	GO:0003906	0.00409835	0.2	1	5	13	15836	TR159997_c0_g1	0.0349385
Molecular Function	nuclear receptor transcription coactivator activity	GO:0030374	0.00409835	0.2	1	5	13	15836	TR159997_c0_g1	0.0349385
Biological process	regulation of chromatin silencing	GO:0031935	0.00491616	0.166667	1	6	13	15836	TR159997_c0_g1	0.0408881
Biological process	chromatin disassembly	GO:0031498	0.00573335	0.142857	1	7	13	15836	TR159997_c0_g1	0.0444335
Biological process	negative regulation of gene silencing	GO:0060969	0.00573335	0.142857	1	7	13	15836	TR159997_c0_g1	0.0444335
Biological process	negative regulation of chromatin organization	GO:1905268	0.00573335	0.142857	1	7	13	15836	TR159997_c0_g1	0.0444335
Biological process	regulation of gene silencing	GO:0060968	0.00654992	0.125	1	8	13	15836	TR159997_c0_g1	0.0485548
Molecular Function	glutathione transferase activity	GO:0004364	0.00654992	0.125	1	8	13	15836	TR6811_c0_g1	0.0485548
Biological process	positive regulation of gene expression, epigenetic	GO:0045815	0.00736587	0.111111	1	9	13	15836	TR159997_c0_g1	0.0534417
Molecular Function	O-methyltransferase activity	GO:0008171	0.0081812	0.1	1	10	13	15836	TR2946_c0_g1	0.0581206
Cellular Component	heterochromatin	GO:0000792	0.00899591	0.0909091	1	11	13	15836	TR159997_c0_g1	0.0626042
Biological process	response to virus	GO:0009615	0.0106235	0.0769231	1	13	13	15836	TR159997_c0_g1	0.0724522
Molecular Function	DNA-binding transcription activator activity, RNA polymerase II-specific	GO:0001228	0.0130602	0.0625	1	16	13	15836	TR159997_c0_g1	0.0873242
Molecular Function	nuclear hormone receptor binding	GO:0035257	0.0138712	0.0588235	1	17	13	15836	TR159997_c0_g1	0.089247
Molecular Function	hormone receptor binding	GO:0051427	0.0138712	0.0588235	1	17	13	15836	TR159997_c0_g1	0.089247
Biological process	S-adenosylmethionine biosynthetic process	GO:0006556	0.0146816	0.0555556	1	18	13	15836	TR639_c1_g1	0.0927118
Molecular Function	methionine adenosyltransferase activity	GO:0004478	0.0154914	0.0526316	1	19	13	15836	TR639_c1_g1	0.0950263
Biological process	sulfur compound metabolic process	GO:0006790	0.0156055	0.00843882	2	237	13	15836	TR6811_c0_g1,TR639_c1_g1	0.0950263
Biological process	DNA duplex unwinding	GO:0032508	0.0163006	0.05	1	20	13	15836	TR159997_c0_g1	0.0975175
Biological process	DNA geometric change	GO:0032392	0.0179171	0.0454545	1	22	13	15836	TR159997_c0_g1	0.10534
Biological process	glutathione metabolic process	GO:0006749	0.0195311	0.0416667	1	24	13	15836	TR6811_c0_g1	0.111855
Biological process	S-adenosylmethionine metabolic process	GO:0046500	0.0203372	0.04	1	25	13	15836	TR639_c1_g1	0.111855
Biological process	regulation of chromatin organization	GO:1902275	0.0203372	0.04	1	25	13	15836	TR159997_c0_g1	0.111855
Cellular Component	RNA polymerase II transcription factor complex	GO:0090575	0.0203372	0.04	1	25	13	15836	TR159997_c0_g1	0.111855
Molecular Function	transcription coactivator activity	GO:0003713	0.0211427	0.0384615	1	26	13	15836	TR159997_c0_g1	0.114439
Cellular Component	nuclear transcription factor complex	GO:0044798	0.025161	0.0322581	1	31	13	15836	TR159997_c0_g1	0.134061
Biological process	negative regulation of chromosome organization	GO:2001251	0.0259628	0.03125	1	32	13	15836	TR159997_c0_g1	0.136205
Molecular Function	transcription coregulator activity	GO:0003712	0.030761	0.0263158	1	38	13	15836	TR159997_c0_g1	0.15324
Cellular Component	transcription factor complex	GO:0005667	0.030761	0.0263158	1	38	13	15836	TR159997_c0_g1	0.15324
Biological process	chromatin remodeling	GO:0006338	0.0315586	0.025641	1	39	13	15836	TR159997_c0_g1	0.15324
Biological process	negative regulation of cell proliferation	GO:0008285	0.0315586	0.025641	1	39	13	15836	TR159997_c0_g1	0.15324
Biological process	pigment metabolic process	GO:0042440	0.0323556	0.025	1	40	13	15836	TR2946_c0_g1	0.15324
Biological process	pigment biosynthetic process	GO:0046148	0.0323556	0.025	1	40	13	15836	TR2946_c0_g1	0.15324
Molecular Function	chromatin binding	GO:0003682	0.0323556	0.025	1	40	13	15836	TR159997_c0_g1	0.15324
Biological process	cell aging	GO:0007569	0.0339477	0.0238095	1	42	13	15836	TR159997_c0_g1	0.156435
Biological process	chromatin assembly	GO:0031497	0.0339477	0.0238095	1	42	13	15836	TR159997_c0_g1	0.156435
Biological process	glycosyl compound biosynthetic process	GO:1901659	0.0355374	0.0227273	1	44	13	15836	TR2946_c0_g1	0.161577
Biological process	viral process	GO:0016032	0.0379174	0.0212766	1	47	13	15836	TR159997_c0_g1	0.17013
Biological process	DNA-dependent DNA replication	GO:0006261	0.0395011	0.0204082	1	49	13	15836	TR159997_c0_g1	0.170843
Biological process	nucleosome organization	GO:0034728	0.0395011	0.0204082	1	49	13	15836	TR159997_c0_g1	0.170843
Molecular Function	transferase activity	GO:0016740	0.0402384	0.00239952	4	1667	13	15836	TR6811_c0_g1,TR639_c1_g1,TR2946_c0_g1,TR11503_c0_g1	0.170843
Biological process	chromatin assembly or disassembly	GO:0006333	0.0402921	0.02	1	50	13	15836	TR159997_c0_g1	0.170843
Biological process	one-carbon metabolic process	GO:0006730	0.0410824	0.0196078	1	51	13	15836	TR639_c1_g1	0.170843
Biological process	symbiont process	GO:0044403	0.0410824	0.0196078	1	51	13	15836	TR159997_c0_g1	0.170843
Biological process	response to external biotic stimulus	GO:0043207	0.0426613	0.0188679	1	53	13	15836	TR159997_c0_g1	0.173184
Biological process	response to other organism	GO:0051707	0.0426613	0.0188679	1	53	13	15836	TR159997_c0_g1	0.173184
Biological process	response to biotic stimulus	GO:0009607	0.045025	0.0178571	1	56	13	15836	TR159997_c0_g1	0.176477
Biological process	interspecies interaction between organisms	GO:0044419	0.045025	0.0178571	1	56	13	15836	TR159997_c0_g1	0.176477
Molecular Function	sequence-specific double-stranded DNA binding	GO:1990837	0.045025	0.0178571	1	56	13	15836	TR159997_c0_g1	0.176477
Biological process	DNA packaging	GO:0006323	0.0465979	0.0172414	1	58	13	15836	TR159997_c0_g1	0.176554
Biological process	aging	GO:0007568	0.0465979	0.0172414	1	58	13	15836	TR159997_c0_g1	0.176554
Biological process	regulation of chromosome organization	GO:0033044	0.0465979	0.0172414	1	58	13	15836	TR159997_c0_g1	0.176554
Biological process	cofactor metabolic process	GO:0051186	0.0480766	0.0045977	2	435	13	15836	TR6811_c0_g1,TR639_c1_g1	0.180155
Molecular Function	catalytic activity, acting on DNA	GO:0140097	0.0489527	0.0163934	1	61	13	15836	TR159997_c0_g1	0.181444
Molecular Function	transcription factor binding	GO:0008134	0.0497365	0.016129	1	62	13	15836	TR159997_c0_g1	0.182367
Biological process	chromatin silencing	GO:0006342	0.0520842	0.0153846	1	65	13	15836	TR159997_c0_g1	0.185007
Biological process	negative regulation of organelle organization	GO:0010639	0.0520842	0.0153846	1	65	13	15836	TR159997_c0_g1	0.185007
Biological process	negative regulation of gene expression, epigenetic	GO:0045814	0.0520842	0.0153846	1	65	13	15836	TR159997_c0_g1	0.185007
Biological process	DNA replication	GO:0006260	0.0528655	0.0151515	1	66	13	15836	TR159997_c0_g1	0.185847
Biological process	cellular modified amino acid metabolic process	GO:0006575	0.055985	0.0142857	1	70	13	15836	TR6811_c0_g1	0.190909
Biological process	gene silencing	GO:0016458	0.055985	0.0142857	1	70	13	15836	TR159997_c0_g1	0.190909
Biological process	regulation of cellular response to stress	GO:0080135	0.055985	0.0142857	1	70	13	15836	TR159997_c0_g1	0.190909
Biological process	regulation of gene expression, epigenetic	GO:0040029	0.0590951	0.0135135	1	74	13	15836	TR159997_c0_g1	0.199519
Molecular Function	DNA-binding transcription factor activity, RNA polymerase II-specific	GO:0000981	0.0598711	0.0133333	1	75	13	15836	TR159997_c0_g1	0.200082
Molecular Function	amino acid transmembrane transporter activity	GO:0015171	0.0606465	0.0131579	1	76	13	15836	TR84829_c0_g1	0.200082
Biological process	positive regulation of developmental process	GO:0051094	0.0614214	0.012987	1	77	13	15836	TR159997_c0_g1	0.200082
Biological process	regulation of cell proliferation	GO:0042127	0.0621956	0.0128205	1	78	13	15836	TR159997_c0_g1	0.200082
Biological process	DNA conformation change	GO:0071103	0.0621956	0.0128205	1	78	13	15836	TR159997_c0_g1	0.200082
Molecular Function	double-stranded DNA binding	GO:0003690	0.0637424	0.0125	1	80	13	15836	TR159997_c0_g1	0.203142
Molecular Function	peroxidase activity	GO:0004601	0.0652868	0.0121951	1	82	13	15836	TR5959_c1_g1	0.206137
Biological process	glycosyl compound metabolic process	GO:1901657	0.0660581	0.0120482	1	83	13	15836	TR2946_c0_g1	0.206659
Biological process	cellular oxidant detoxification	GO:0098869	0.067599	0.0117647	1	85	13	15836	TR5959_c1_g1	0.209557
Biological process	response to stimulus	GO:0050896	0.0698867	0.00250208	3	1199	13	15836	TR159997_c0_g1,TR44_c2_g1,TR5959_c1_g1	0.212703
Cellular Component	cell-substrate adherens junction	GO:0005924	0.0722075	0.010989	1	91	13	15836	TR159997_c0_g1	0.212703
Cellular Component	focal adhesion	GO:0005925	0.0722075	0.010989	1	91	13	15836	TR159997_c0_g1	0.212703
Cellular Component	cell-substrate junction	GO:0030055	0.0722075	0.010989	1	91	13	15836	TR159997_c0_g1	0.212703
Molecular Function	oxidoreductase activity, acting on peroxide as aCellular Componenteptor	GO:0016684	0.0729735	0.0108696	1	92	13	15836	TR5959_c1_g1	0.212703
Molecular Function	organic acid transmembrane transporter activity	GO:0005342	0.073739	0.0107527	1	93	13	15836	TR84829_c0_g1	0.212703
Molecular Function	carboxylic acid transmembrane transporter activity	GO:0046943	0.073739	0.0107527	1	93	13	15836	TR84829_c0_g1	0.212703
Biological process	cell proliferation	GO:0008283	0.0752681	0.0105263	1	95	13	15836	TR159997_c0_g1	0.212703
Biological process	protein-containing complex disassembly	GO:0032984	0.0760319	0.0104167	1	96	13	15836	TR159997_c0_g1	0.212703
Biological process	protein-DNA complex subunit organization	GO:0071824	0.0760319	0.0104167	1	96	13	15836	TR159997_c0_g1	0.212703
Biological process	cellular detoxification	GO:1990748	0.076795	0.0103093	1	97	13	15836	TR5959_c1_g1	0.212703
Biological process	detoxification	GO:0098754	0.0775575	0.0102041	1	98	13	15836	TR5959_c1_g1	0.212703
Molecular Function	signaling receptor binding	GO:0005102	0.0775575	0.0102041	1	98	13	15836	TR159997_c0_g1	0.212703
Cellular Component	adherens junction	GO:0005912	0.0783195	0.010101	1	99	13	15836	TR159997_c0_g1	0.212703
Cellular Component	anchoring junction	GO:0070161	0.0783195	0.010101	1	99	13	15836	TR159997_c0_g1	0.212703
Molecular Function	sequence-specific DNA binding	GO:0043565	0.0790809	0.01	1	100	13	15836	TR159997_c0_g1	0.212703
Molecular Function	organic anion transmembrane transporter activity	GO:0008514	0.0798417	0.00990099	1	101	13	15836	TR84829_c0_g1	0.212703
Molecular Function	carbon-oxygen lyase activity	GO:0016835	0.0798417	0.00990099	1	101	13	15836	TR159997_c0_g1	0.212703
Biological process	negative regulation of cellular component organization	GO:0051129	0.0806019	0.00980392	1	102	13	15836	TR159997_c0_g1	0.213064
Biological process	amino acid transport	GO:0006865	0.0828791	0.00952381	1	105	13	15836	TR84829_c0_g1	0.217398
Biological process	cellular response to toxic substance	GO:0097237	0.085151	0.00925926	1	108	13	15836	TR5959_c1_g1	0.221653
Biological process	regulation of response to stress	GO:0080134	0.0859072	0.00917431	1	109	13	15836	TR159997_c0_g1	0.221927
Biological process	positive regulation of response to stimulus	GO:0048584	0.0889261	0.00884956	1	113	13	15836	TR159997_c0_g1	0.227999
Biological process	positive regulation of transcription by RNA polymerase II	GO:0045944	0.0911843	0.00862069	1	116	13	15836	TR159997_c0_g1	0.228631
Molecular Function	calcium ion binding	GO:0005509	0.0911843	0.00862069	1	116	13	15836	TR24295_c0_g1	0.228631
Molecular Function	methyltransferase activity	GO:0008168	0.0911843	0.00862069	1	116	13	15836	TR2946_c0_g1	0.228631
Molecular Function	antioxidant activity	GO:0016209	0.0919358	0.00854701	1	117	13	15836	TR5959_c1_g1	0.228833
Biological process	DNA repair	GO:0006281	0.0934372	0.00840336	1	119	13	15836	TR159997_c0_g1	0.230885
Cellular Component	cell junction	GO:0030054	0.0964332	0.00813008	1	123	13	15836	TR159997_c0_g1	0.236573
Biological process	response to toxic substance	GO:0009636	0.0971807	0.00806452	1	124	13	15836	TR5959_c1_g1	0.236705
Biological process	response to stress	GO:0006950	0.0993655	0.00303951	2	658	13	15836	TR159997_c0_g1,TR44_c2_g1	0.24031
Molecular Function	DNA-binding transcription factor activity	GO:0003700	0.100165	0.0078125	1	128	13	15836	TR159997_c0_g1	0.240538
Cellular Component	chromatin	GO:0000785	0.102398	0.00763359	1	131	13	15836	TR159997_c0_g1	0.242558
Biological process	cellular component disassembly	GO:0022411	0.103141	0.00757576	1	132	13	15836	TR159997_c0_g1	0.242558
Molecular Function	anion transmembrane transporter activity	GO:0008509	0.103141	0.00757576	1	132	13	15836	TR84829_c0_g1	0.242558
Biological process	positive regulation of transcription, DNA-templated	GO:0045893	0.106847	0.00729927	1	137	13	15836	TR159997_c0_g1	0.246182
Biological process	positive regulation of RNA biosynthetic process	GO:1902680	0.106847	0.00729927	1	137	13	15836	TR159997_c0_g1	0.246182
Biological process	positive regulation of nucleic acid-templated transcription	GO:1903508	0.106847	0.00729927	1	137	13	15836	TR159997_c0_g1	0.246182
Biological process	organic acid transport	GO:0015849	0.108326	0.00719425	1	139	13	15836	TR84829_c0_g1	0.246261
Biological process	carboxylic acid transport	GO:0046942	0.108326	0.00719425	1	139	13	15836	TR84829_c0_g1	0.246261
Molecular Function	transferase activity, transferring one-carbon groups	GO:0016741	0.112013	0.00694444	1	144	13	15836	TR2946_c0_g1	0.252955
Biological process	response to external stimulus	GO:0009605	0.113483	0.00684931	1	146	13	15836	TR159997_c0_g1	0.254564
Biological process	positive regulation of RNA metabolic process	GO:0051254	0.114218	0.00680272	1	147	13	15836	TR159997_c0_g1	0.254564
Biological process	cellular response to DNA damage stimulus	GO:0006974	0.120074	0.00645161	1	155	13	15836	TR159997_c0_g1	0.263768
Biological process	negative regulation of transcription, DNA-templated	GO:0045892	0.121532	0.00636943	1	157	13	15836	TR159997_c0_g1	0.263768
Molecular Function	transcription regulator activity	GO:0140110	0.121532	0.00636943	1	157	13	15836	TR159997_c0_g1	0.263768
Biological process	negative regulation of RNA biosynthetic process	GO:1902679	0.122261	0.00632911	1	158	13	15836	TR159997_c0_g1	0.263768
Biological process	negative regulation of nucleic acid-templated transcription	GO:1903507	0.122261	0.00632911	1	158	13	15836	TR159997_c0_g1	0.263768
Biological process	regulation of developmental process	GO:0050793	0.122988	0.00628931	1	159	13	15836	TR159997_c0_g1	0.263768
Biological process	sulfur compound biosynthetic process	GO:0044272	0.125168	0.00617284	1	162	13	15836	TR639_c1_g1	0.264999
Biological process	positive regulation of nucleobase-containing compound metabolic process	GO:0045935	0.125168	0.00617284	1	162	13	15836	TR159997_c0_g1	0.264999
Biological process	organic anion transport	GO:0015711	0.125894	0.00613497	1	163	13	15836	TR84829_c0_g1	0.264999
Biological process	negative regulation of RNA metabolic process	GO:0051253	0.130236	0.00591716	1	169	13	15836	TR159997_c0_g1	0.272457
Biological process	chromatin organization	GO:0006325	0.13886	0.00552486	1	181	13	15836	TR159997_c0_g1	0.287163
Biological process	negative regulation of nucleobase-containing compound metabolic process	GO:0045934	0.139575	0.00549451	1	182	13	15836	TR159997_c0_g1	0.287163
Molecular Function	metal ion binding	GO:0046872	0.139792	0.00185758	3	1615	13	15836	TR24295_c0_g1,TR639_c1_g1,TR2946_c0_g1	0.287163
Biological process	negative regulation of cellular macromolecule biosynthetic process	GO:2000113	0.141004	0.00543478	1	184	13	15836	TR159997_c0_g1	0.287918
Biological process	negative regulation of macromolecule biosynthetic process	GO:0010558	0.143142	0.00534759	1	187	13	15836	TR159997_c0_g1	0.290545
Molecular Function	cation binding	GO:0043169	0.145019	0.00182704	3	1642	13	15836	TR24295_c0_g1,TR639_c1_g1,TR2946_c0_g1	0.292613
Biological process	negative regulation of cellular biosynthetic process	GO:0031327	0.147405	0.00518135	1	193	13	15836	TR159997_c0_g1	0.293948
Biological process	regulation of organelle organization	GO:0033043	0.147405	0.00518135	1	193	13	15836	TR159997_c0_g1	0.293948
Biological process	negative regulation of biosynthetic process	GO:0009890	0.149529	0.00510204	1	196	13	15836	TR159997_c0_g1	0.29645
Biological process	positive regulation of macromolecule biosynthetic process	GO:0010557	0.150942	0.00505051	1	198	13	15836	TR159997_c0_g1	0.297522
Biological process	positive regulation of cellular biosynthetic process	GO:0031328	0.155872	0.00487805	1	205	13	15836	TR159997_c0_g1	0.303727
Cellular Component	nucleoplasm	GO:0005654	0.155872	0.00487805	1	205	13	15836	TR159997_c0_g1	0.303727
Biological process	positive regulation of biosynthetic process	GO:0009891	0.157976	0.00480769	1	208	13	15836	TR159997_c0_g1	0.306079
Cellular Component	chromosomal part	GO:0044427	0.159377	0.00476191	1	210	13	15836	TR159997_c0_g1	0.306662
Biological process	nuclear transport	GO:0051169	0.160076	0.00473934	1	211	13	15836	TR159997_c0_g1	0.306662
Biological process	positive regulation of gene expression	GO:0010628	0.164261	0.0046083	1	217	13	15836	TR159997_c0_g1	0.312921
Biological process	multi-organism process	GO:0051704	0.169811	0.00444444	1	225	13	15836	TR159997_c0_g1	0.321697
Biological process	anion transport	GO:0006820	0.171883	0.00438597	1	228	13	15836	TR84829_c0_g1	0.323824
Molecular Function	enzyme binding	GO:0019899	0.175326	0.00429184	1	233	13	15836	TR159997_c0_g1	0.328496
Cellular Component	chromosome	GO:0005694	0.1767	0.00425532	1	235	13	15836	TR159997_c0_g1	0.329261
Biological process	coenzyme biosynthetic process	GO:0009108	0.178072	0.00421941	1	237	13	15836	TR639_c1_g1	0.329492
Biological process	DNA metabolic process	GO:0006259	0.178757	0.00420168	1	238	13	15836	TR159997_c0_g1	0.329492
Biological process	cellular response to stimulus	GO:0051716	0.180131	0.00211416	2	946	13	15836	TR159997_c0_g1,TR5959_c1_g1	0.330239
Biological process	negative regulation of gene expression	GO:0010629	0.182174	0.00411523	1	243	13	15836	TR159997_c0_g1	0.332199
Biological process	chromosome organization	GO:0051276	0.183537	0.00408163	1	245	13	15836	TR159997_c0_g1	0.332905
Biological process	regulation of response to stimulus	GO:0048583	0.186936	0.004	1	250	13	15836	TR159997_c0_g1	0.337275
Biological process	regulation of transcription by RNA polymerase II	GO:0006357	0.189645	0.00393701	1	254	13	15836	TR159997_c0_g1	0.340363
Biological process	negative regulation of nitrogen compound metabolic process	GO:0051172	0.199732	0.00371747	1	269	13	15836	TR159997_c0_g1	0.354732
Biological process	cofactor biosynthetic process	GO:0051188	0.199732	0.00371747	1	269	13	15836	TR639_c1_g1	0.354732
Biological process	negative regulation of cellular metabolic process	GO:0031324	0.205728	0.00359712	1	278	13	15836	TR159997_c0_g1	0.363488
Biological process	cellular developmental process	GO:0048869	0.214973	0.00342466	1	292	13	15836	TR159997_c0_g1	0.377865
Biological process	negative regulation of macromolecule metabolic process	GO:0010605	0.221516	0.00331126	1	302	13	15836	TR159997_c0_g1	0.387368
Biological process	positive regulation of nitrogen compound metabolic process	GO:0051173	0.225417	0.00324675	1	308	13	15836	TR159997_c0_g1	0.39218
Cellular Component	cytoskeleton	GO:0005856	0.228654	0.00319489	1	313	13	15836	TR156723_c0_g2	0.394256
Biological process	transcription by RNA polymerase II	GO:0006366	0.2293	0.00318471	1	314	13	15836	TR159997_c0_g1	0.394256
Biological process	coenzyme metabolic process	GO:0006732	0.230591	0.00316456	1	316	13	15836	TR639_c1_g1	0.394256
Molecular Function	lyase activity	GO:0016829	0.231235	0.00315457	1	317	13	15836	TR159997_c0_g1	0.394256
Biological process	positive regulation of macromolecule metabolic process	GO:0010604	0.232523	0.0031348	1	319	13	15836	TR159997_c0_g1	0.394479
Biological process	negative regulation of metabolic process	GO:0009892	0.233808	0.00311526	1	321	13	15836	TR159997_c0_g1	0.394696
Biological process	positive regulation of cellular metabolic process	GO:0031325	0.241479	0.003003	1	333	13	15836	TR159997_c0_g1	0.405638
Molecular Function	peptidase activity	GO:0008233	0.248449	0.00290698	1	344	13	15836	TR5978_c0_g1	0.4153
Biological process	cellular response to chemical stimulus	GO:0070887	0.25034	0.00288184	1	347	13	15836	TR5959_c1_g1	0.415439
Biological process	positive regulation of metabolic process	GO:0009893	0.250969	0.00287356	1	348	13	15836	TR159997_c0_g1	0.415439
Biological process	regulation of cellular component organization	GO:0051128	0.259104	0.00277008	1	361	13	15836	TR159997_c0_g1	0.426833
Biological process	cellular response to stress	GO:0033554	0.27939	0.00253807	1	394	13	15836	TR159997_c0_g1	0.458039
Biological process	RNA metabolic process	GO:0016070	0.286654	0.00155039	2	1290	13	15836	TR159997_c0_g1,TR11503_c0_g1	0.467699
Molecular Function	DNA binding	GO:0003677	0.290836	0.00242131	1	413	13	15836	TR159997_c0_g1	0.472263
Biological process	developmental process	GO:0032502	0.295605	0.0023753	1	421	13	15836	TR159997_c0_g1	0.477732
Biological process	negative regulation of cellular process	GO:0048523	0.312065	0.00222717	1	449	13	15836	TR159997_c0_g1	0.501953
Biological process	carbohydrate derivative biosynthetic process	GO:1901137	0.317279	0.00218341	1	458	13	15836	TR2946_c0_g1	0.507945
Molecular Function	inorganic molecular entity transmembrane transporter activity	GO:0015318	0.324176	0.00212766	1	470	13	15836	TR84829_c0_g1	0.51656
Biological process	nucleic acid metabolic process	GO:0090304	0.329188	0.00140351	2	1425	13	15836	TR159997_c0_g1,TR11503_c0_g1	0.522108
Biological process	response to chemical	GO:0042221	0.33327	0.00205761	1	486	13	15836	TR5959_c1_g1	0.526135
Molecular Function	ion transmembrane transporter activity	GO:0015075	0.336089	0.00203666	1	491	13	15836	TR84829_c0_g1	0.52814
Molecular Function	catalytic activity	GO:0003824	0.339556	0.000995733	7	7030	13	15836	TR159997_c0_g1,TR5978_c0_g1,TR6811_c0_g1,TR639_c1_g1,TR5959_c1_g1,TR2946_c0_g1,TR11503_c0_g1	0.529309
Biological process	negative regulation of biological process	GO:0048519	0.341135	0.002	1	500	13	15836	TR159997_c0_g1	0.529309
Biological process	positive regulation of cellular process	GO:0048522	0.341694	0.00199601	1	501	13	15836	TR159997_c0_g1	0.529309
Biological process	regulation of transcription, DNA-templated	GO:0006355	0.34448	0.00197628	1	506	13	15836	TR159997_c0_g1	0.529309
Biological process	regulation of nucleic acid-templated transcription	GO:1903506	0.346146	0.00196464	1	509	13	15836	TR159997_c0_g1	0.529309
Biological process	regulation of RNA biosynthetic process	GO:2001141	0.346146	0.00196464	1	509	13	15836	TR159997_c0_g1	0.529309
Cellular Component	nuclear lumen	GO:0031981	0.348915	0.00194553	1	514	13	15836	TR159997_c0_g1	0.531161
Biological process	regulation of RNA metabolic process	GO:0051252	0.356063	0.00189753	1	527	13	15836	TR159997_c0_g1	0.53807
Biological process	positive regulation of biological process	GO:0048518	0.356609	0.00189394	1	528	13	15836	TR159997_c0_g1	0.53807
Biological process	regulation of nucleobase-containing compound metabolic process	GO:0019219	0.374416	0.00178253	1	561	13	15836	TR159997_c0_g1	0.562448
Biological process	protein-containing complex subunit organization	GO:0043933	0.395905	0.00166113	1	602	13	15836	TR159997_c0_g1	0.592121
Biological process	intracellular transport	GO:0046907	0.403595	0.00162075	1	617	13	15836	TR159997_c0_g1	0.600986
Biological process	cellular component assembly	GO:0022607	0.407659	0.0016	1	625	13	15836	TR159997_c0_g1	0.604399
Biological process	nitrogen compound transport	GO:0071705	0.427109	0.00150602	1	664	13	15836	TR84829_c0_g1	0.623817
Biological process	ion transport	GO:0006811	0.428091	0.0015015	1	666	13	15836	TR84829_c0_g1	0.623817
Cellular Component	cytoplasm	GO:0005737	0.428256	0.000965624	5	5178	13	15836	TR159997_c0_g1,TR639_c1_g1,TR10703_c2_g1,TR2946_c0_g1,TR6811_c0_g1	0.623817
Biological process	regulation of cellular macromolecule biosynthetic process	GO:2000112	0.430049	0.00149254	1	670	13	15836	TR159997_c0_g1	0.623817
Biological process	establishment of localization in cell	GO:0051649	0.431513	0.00148588	1	673	13	15836	TR159997_c0_g1	0.623817
Biological process	regulation of macromolecule biosynthetic process	GO:0010556	0.432488	0.00148148	1	675	13	15836	TR159997_c0_g1	0.623817
Biological process	transcription, DNA-templated	GO:0006351	0.434917	0.00147059	1	680	13	15836	TR159997_c0_g1	0.623817
Biological process	nucleic acid-templated transcription	GO:0097659	0.437337	0.00145985	1	685	13	15836	TR159997_c0_g1	0.623817
Biological process	RNA biosynthetic process	GO:0032774	0.438302	0.0014556	1	687	13	15836	TR159997_c0_g1	0.623817
Cellular Component	intracellular part	GO:0044424	0.439144	0.000936476	6	6407	13	15836	TR639_c1_g1,TR10703_c2_g1,TR2946_c0_g1,TR6811_c0_g1,TR159997_c0_g1,TR156723_c0_g2	0.623817
Biological process	regulation of cellular biosynthetic process	GO:0031326	0.441668	0.00144092	1	694	13	15836	TR159997_c0_g1	0.623817
Biological process	regulation of biosynthetic process	GO:0009889	0.444061	0.00143062	1	699	13	15836	TR159997_c0_g1	0.623817
Biological process	drug metabolic process	GO:0017144	0.444538	0.00142857	1	700	13	15836	TR639_c1_g1	0.623817
Biological process	carbohydrate derivative metabolic process	GO:1901135	0.448344	0.00141243	1	708	13	15836	TR2946_c0_g1	0.626579
Biological process	regulation of gene expression	GO:0010468	0.456352	0.00137931	1	725	13	15836	TR159997_c0_g1	0.635168
Biological process	organic substance transport	GO:0071702	0.460083	0.00136426	1	733	13	15836	TR84829_c0_g1	0.637758
Cellular Component	intracellular organelle lumen	GO:0070013	0.470223	0.0013245	1	755	13	15836	TR159997_c0_g1	0.64521
Cellular Component	membrane-enclosed lumen	GO:0031974	0.471136	0.001321	1	757	13	15836	TR159997_c0_g1	0.64521
Cellular Component	organelle lumen	GO:0043233	0.471136	0.001321	1	757	13	15836	TR159997_c0_g1	0.64521
Molecular Function	transmembrane transporter activity	GO:0022857	0.474773	0.00130719	1	765	13	15836	TR84829_c0_g1	0.647591
Molecular Function	catalytic activity, acting on a protein	GO:0140096	0.484657	0.00127065	1	787	13	15836	TR5978_c0_g1	0.658439
Biological process	cellular localization	GO:0051641	0.490858	0.00124844	1	801	13	15836	TR159997_c0_g1	0.664216
Cellular Component	nuclear part	GO:0044428	0.494807	0.00123457	1	810	13	15836	TR159997_c0_g1	0.666914
Cellular Component	intracellular	GO:0005622	0.500663	0.000890869	6	6735	13	15836	TR159997_c0_g1,TR639_c1_g1,TR10703_c2_g1,TR2946_c0_g1,TR6811_c0_g1,TR156723_c0_g2	0.67215
Cellular Component	intracellular non-membrane-bounded organelle	GO:0043232	0.505418	0.00099453	2	2011	13	15836	TR156723_c0_g2,TR159997_c0_g1	0.673607
Cellular Component	non-membrane-bounded organelle	GO:0043228	0.505699	0.000994036	2	2012	13	15836	TR156723_c0_g2,TR159997_c0_g1	0.673607
Biological process	regulation of nitrogen compound metabolic process	GO:0051171	0.517497	0.00115875	1	863	13	15836	TR159997_c0_g1	0.68664
Biological process	organelle organization	GO:0006996	0.522502	0.00114286	1	875	13	15836	TR159997_c0_g1	0.690594
Biological process	nucleobase-containing compound metabolic process	GO:0006139	0.525699	0.000959693	2	2084	13	15836	TR159997_c0_g1,TR11503_c0_g1	0.691783
Biological process	regulation of primary metabolic process	GO:0080090	0.527459	0.0011274	1	887	13	15836	TR159997_c0_g1	0.691783
Biological process	regulation of cellular metabolic process	GO:0031323	0.52951	0.00112108	1	892	13	15836	TR159997_c0_g1	0.691812
Biological process	regulation of macromolecule metabolic process	GO:0060255	0.531961	0.00111359	1	898	13	15836	TR159997_c0_g1	0.692362
Cellular Component	cell part	GO:0044464	0.53855	0.000864803	6	6938	13	15836	TR639_c1_g1,TR10703_c2_g1,TR2946_c0_g1,TR6811_c0_g1,TR159997_c0_g1,TR156723_c0_g2	0.698272
Cellular Component	cell	GO:0005623	0.543372	0.000861574	6	6964	13	15836	TR159997_c0_g1,TR639_c1_g1,TR10703_c2_g1,TR2946_c0_g1,TR6811_c0_g1,TR156723_c0_g2	0.701856
Biological process	regulation of metabolic process	GO:0019222	0.551147	0.00105708	1	946	13	15836	TR159997_c0_g1	0.709212
Molecular Function	molecular_function	GO:0003674	0.561161	0.000849762	10	11768	13	15836	TR156723_c0_g2,TR159997_c0_g1,TR24295_c0_g1,TR5978_c0_g1,TR6811_c0_g1,TR639_c1_g1,TR5959_c1_g1,TR84829_c0_g1,TR2946_c0_g1,TR11503_c0_g1	0.719382
Biological process	heterocycle metabolic process	GO:0046483	0.566402	0.000894454	2	2236	13	15836	TR159997_c0_g1,TR11503_c0_g1	0.721015
Biological process	cellular aromatic compound metabolic process	GO:0006725	0.566663	0.000894055	2	2237	13	15836	TR159997_c0_g1,TR11503_c0_g1	0.721015
Biological process	organic substance metabolic process	GO:0071704	0.571389	0.00084488	5	5918	13	15836	TR6811_c0_g1,TR159997_c0_g1,TR639_c1_g1,TR2946_c0_g1,TR11503_c0_g1	0.721462
Molecular Function	transporter activity	GO:0005215	0.572613	0.000998004	1	1002	13	15836	TR84829_c0_g1	0.721462
Biological process	cellular component biogenesis	GO:0044085	0.573362	0.000996016	1	1004	13	15836	TR159997_c0_g1	0.721462
Biological process	organic cyclic compound metabolic process	GO:1901360	0.580089	0.000873744	2	2289	13	15836	TR159997_c0_g1,TR11503_c0_g1	0.725044
Biological process	organic substance biosynthetic process	GO:1901576	0.580461	0.000849377	3	3532	13	15836	TR159997_c0_g1,TR639_c1_g1,TR2946_c0_g1	0.725044
Molecular Function	ion binding	GO:0043167	0.584558	0.000844832	3	3551	13	15836	TR24295_c0_g1,TR639_c1_g1,TR2946_c0_g1	0.727497
Biological process	biosynthetic process	GO:0009058	0.594608	0.000833797	3	3598	13	15836	TR159997_c0_g1,TR639_c1_g1,TR2946_c0_g1	0.737314
Molecular Function	protein binding	GO:0005515	0.606525	0.000912409	1	1096	13	15836	TR159997_c0_g1	0.749366
Biological process	cellular nitrogen compound metabolic process	GO:0034641	0.612055	0.000814996	3	3681	13	15836	TR6811_c0_g1,TR159997_c0_g1,TR11503_c0_g1	0.753468
Biological process	nucleobase-containing compound biosynthetic process	GO:0034654	0.615457	0.000891266	1	1122	13	15836	TR159997_c0_g1	0.754931
Biological process	transport	GO:0006810	0.620478	0.000815661	2	2452	13	15836	TR84829_c0_g1,TR159997_c0_g1	0.758362
Biological process	establishment of localization	GO:0051234	0.6281	0.000805153	2	2484	13	15836	TR84829_c0_g1,TR159997_c0_g1	0.764936
Molecular Function	binding	GO:0005488	0.648181	0.000788519	5	6341	13	15836	TR156723_c0_g2,TR24295_c0_g1,TR159997_c0_g1,TR639_c1_g1,TR2946_c0_g1	0.78303
Molecular Function	nucleotide binding	GO:0000166	0.650804	0.000774593	2	2582	13	15836	TR639_c1_g1,TR156723_c0_g2	0.78303
Molecular Function	nucleoside phosphate binding	GO:1901265	0.650804	0.000774593	2	2582	13	15836	TR156723_c0_g2,TR639_c1_g1	0.78303
Biological process	aromatic compound biosynthetic process	GO:0019438	0.652143	0.000809717	1	1235	13	15836	TR159997_c0_g1	0.78303
Cellular Component	cellular_component	GO:0005575	0.655405	0.000804505	8	9944	13	15836	TR48963_c0_g1,TR84829_c0_g1,TR159997_c0_g1,TR156723_c0_g2,TR639_c1_g1,TR10703_c2_g1,TR2946_c0_g1,TR6811_c0_g1	0.784186
Biological process	localization	GO:0051179	0.66024	0.000762195	2	2624	13	15836	TR84829_c0_g1,TR159997_c0_g1	0.787209
Biological process	heterocycle biosynthetic process	GO:0018130	0.663734	0.000785546	1	1273	13	15836	TR159997_c0_g1	0.788618
Molecular Function	ATP binding	GO:0005524	0.669396	0.000773994	1	1292	13	15836	TR639_c1_g1	0.792583
Biological process	organic cyclic compound biosynthetic process	GO:1901362	0.673511	0.000765697	1	1306	13	15836	TR159997_c0_g1	0.793662
Molecular Function	adenyl ribonucleotide binding	GO:0032559	0.676421	0.000759878	1	1316	13	15836	TR639_c1_g1	0.793662
Molecular Function	adenyl nucleotide binding	GO:0030554	0.677289	0.00075815	1	1319	13	15836	TR639_c1_g1	0.793662
Biological process	cellular component organization	GO:0016043	0.681884	0.000749064	1	1335	13	15836	TR159997_c0_g1	0.79631
Molecular Function	small molecule binding	GO:0036094	0.691037	0.000722804	2	2767	13	15836	TR156723_c0_g2,TR639_c1_g1	0.802545
Biological process	metabolic process	GO:0008152	0.695427	0.000766284	6	7830	13	15836	TR5959_c1_g1,TR6811_c0_g1,TR159997_c0_g1,TR639_c1_g1,TR2946_c0_g1,TR11503_c0_g1	0.802545
Molecular Function	heterocyclic compound binding	GO:1901363	0.695553	0.000729927	3	4110	13	15836	TR156723_c0_g2,TR159997_c0_g1,TR639_c1_g1	0.802545
Molecular Function	organic cyclic compound binding	GO:0097159	0.696637	0.000728863	3	4116	13	15836	TR156723_c0_g2,TR159997_c0_g1,TR639_c1_g1	0.802545
Molecular Function	drug binding	GO:0008144	0.704502	0.000705716	1	1417	13	15836	TR639_c1_g1	0.808872
Biological process	regulation of cellular process	GO:0050794	0.71832	0.000680272	1	1470	13	15836	TR159997_c0_g1	0.82197
Molecular Function	nucleic acid binding	GO:0003676	0.724379	0.000669344	1	1494	13	15836	TR159997_c0_g1	0.826131
Cellular Component	cytosol	GO:0005829	0.736857	0.000647249	1	1545	13	15836	TR159997_c0_g1	0.836402
Biological process	regulation of biological process	GO:0050789	0.738291	0.000644745	1	1551	13	15836	TR159997_c0_g1	0.836402
Biological process	oxidation-reduction process	GO:0055114	0.747663	0.000628536	1	1591	13	15836	TR5959_c1_g1	0.844215
Biological process	cellular metabolic process	GO:0044237	0.754818	0.000694927	4	5756	13	15836	TR6811_c0_g1,TR159997_c0_g1,TR639_c1_g1,TR11503_c0_g1	0.847124
Molecular Function	purine ribonucleoside triphosphate binding	GO:0035639	0.760484	0.000606796	1	1648	13	15836	TR639_c1_g1	0.847124
Biological process	peptide metabolic process	GO:0006518	0.761141	0.000605694	1	1651	13	15836	TR6811_c0_g1	0.847124
Biological process	cellular process	GO:0009987	0.762946	0.000708115	5	7061	13	15836	TR6811_c0_g1,TR159997_c0_g1,TR639_c1_g1,TR11503_c0_g1,TR5959_c1_g1	0.847124
Molecular Function	purine ribonucleotide binding	GO:0032555	0.7657	0.000598086	1	1672	13	15836	TR639_c1_g1	0.847124
Molecular Function	purine nucleotide binding	GO:0017076	0.766773	0.000596303	1	1677	13	15836	TR639_c1_g1	0.847124
Biological process	cellular component organization or biogenesis	GO:0071840	0.767629	0.000594884	1	1681	13	15836	TR159997_c0_g1	0.847124
Molecular Function	ribonucleotide binding	GO:0032553	0.779508	0.000575374	1	1738	13	15836	TR639_c1_g1	0.856925
Biological process	biological_process	GO:0008150	0.782598	0.000746756	8	10713	13	15836	TR159997_c0_g1,TR5959_c1_g1,TR6811_c0_g1,TR639_c1_g1,TR84829_c0_g1,TR44_c2_g1,TR2946_c0_g1,TR11503_c0_g1	0.856925
Biological process	cellular amide metabolic process	GO:0043603	0.786522	0.000564016	1	1773	13	15836	TR6811_c0_g1	0.856925
Biological process	small molecule metabolic process	GO:0044281	0.788879	0.000560224	1	1785	13	15836	TR639_c1_g1	0.856925
Molecular Function	carbohydrate derivative binding	GO:0097367	0.789075	0.00055991	1	1786	13	15836	TR639_c1_g1	0.856925
Biological process	biological regulation	GO:0065007	0.79237	0.000554631	1	1803	13	15836	TR159997_c0_g1	0.857772
Cellular Component	membrane	GO:0016020	0.796694	0.000632378	3	4744	13	15836	TR159997_c0_g1,TR48963_c0_g1,TR84829_c0_g1	0.859723
Cellular Component	nucleus	GO:0005634	0.809571	0.000527426	1	1896	13	15836	TR159997_c0_g1	0.870863
Biological process	cellular biosynthetic process	GO:0044249	0.815666	0.000573888	2	3485	13	15836	TR159997_c0_g1,TR639_c1_g1	0.87466
Molecular Function	oxidoreductase activity	GO:0016491	0.828699	0.00049776	1	2009	13	15836	TR5959_c1_g1	0.88585
Biological process	nitrogen compound metabolic process	GO:0006807	0.834971	0.000595002	3	5042	13	15836	TR6811_c0_g1,TR159997_c0_g1,TR11503_c0_g1	0.889766
Molecular Function	anion binding	GO:0043168	0.848646	0.00046729	1	2140	13	15836	TR639_c1_g1	0.899412
Molecular Function	hydrolase activity	GO:0016787	0.851919	0.000462321	1	2163	13	15836	TR5978_c0_g1	0.899412
Cellular Component	integral component of membrane	GO:0016021	0.852341	0.000461681	1	2166	13	15836	TR159997_c0_g1	0.899412
Cellular Component	intrinsic component of membrane	GO:0031224	0.854573	0.000458295	1	2182	13	15836	TR159997_c0_g1	0.899412
Biological process	macromolecule metabolic process	GO:0043170	0.863752	0.000516929	2	3869	13	15836	TR159997_c0_g1,TR11503_c0_g1	0.906276
Biological process	cellular macromolecule biosynthetic process	GO:0034645	0.882382	0.000416146	1	2403	13	15836	TR159997_c0_g1	0.92228
Biological process	macromolecule biosynthetic process	GO:0009059	0.884415	0.000413052	1	2421	13	15836	TR159997_c0_g1	0.92228
Cellular Component	intracellular organelle part	GO:0044446	0.898065	0.000392157	1	2550	13	15836	TR159997_c0_g1	0.93226
Cellular Component	organelle part	GO:0044422	0.899453	0.000390016	1	2564	13	15836	TR159997_c0_g1	0.93226
Biological process	gene expression	GO:0010467	0.911536	0.000371195	1	2694	13	15836	TR159997_c0_g1	0.94192
Cellular Component	membrane part	GO:0044425	0.919661	0.000358295	1	2791	13	15836	TR159997_c0_g1	0.947446
Biological process	cellular nitrogen compound biosynthetic process	GO:0044271	0.924715	0.00035014	1	2856	13	15836	TR159997_c0_g1	0.949783
Cellular Component	protein-containing complex	GO:0032991	0.937727	0.000328515	1	3044	13	15836	TR159997_c0_g1	0.960255
Biological process	cellular macromolecule metabolic process	GO:0044260	0.950305	0.000306373	1	3264	13	15836	TR159997_c0_g1	0.968181
Cellular Component	intracellular organelle	GO:0043229	0.952322	0.000395413	2	5058	13	15836	TR156723_c0_g2,TR159997_c0_g1	0.968181
Cellular Component	organelle	GO:0043226	0.953985	0.000392542	2	5095	13	15836	TR156723_c0_g2,TR159997_c0_g1	0.968181
Cellular Component	intracellular membrane-bounded organelle	GO:0043231	0.967644	0.000272331	1	3672	13	15836	TR159997_c0_g1	0.977777
Cellular Component	membrane-bounded organelle	GO:0043227	0.971374	0.000264131	1	3786	13	15836	TR159997_c0_g1	0.977777
Biological process	primary metabolic process	GO:0044238	0.972042	0.000357398	2	5596	13	15836	TR159997_c0_g1,TR11503_c0_g1	0.977777
Biological process	organonitrogen compound metabolic process	GO:1901564	0.9773	0.000250063	1	3999	13	15836	TR6811_c0_g1	0.980174
Cellular Component	cytoplasmic part	GO:0044444	0.986826	0.000223015	1	4484	13	15836	TR159997_c0_g1	0.986826
