# Supplementary material for: Transcriptome and metabolome analyses provide insights into the relevance of pericarp thickness variations in Camellia drupifera and Camellia oleifera
Source: Front Plant Sci. 2022 Oct 27;13:1016475. doi: 10.3389/fpls.2022.1016475 (PMC9647060; doi:10.3389/fpls.2022.1016475)
Supplement: Supplementary Table 5 — 334 conserved single-copy nuclear genes. [file Table_5.xlsx]

## Sheet: Sheet1
Supplementary Table S5 334 conserved single-copy nuclear genes.
query	seed_ortholog	evalue	score	eggNOG_OGs	max_annot_lvl	COG_category	Description	Preferred_name	GOs	EC	KEGG_ko	KEGG_Pathway	KEGG_Module	KEGG_Reaction	KEGG_rclass	BRITE	KEGG_TC	CAZy	BiGG_Reaction	PFAMs
XP_028127108.1	29760.VIT_05s0049g00960.t01	0.0	1006.0	COG0415@1|root,KOG0133@2759|Eukaryota,37JTK@33090|Viridiplantae,3GGIT@35493|Streptophyta	35493|Streptophyta	LT	circadian regulation of calcium ion oscillation	CRY2	GO:0000003,GO:0000166,GO:0001101,GO:0002252,GO:0002376,GO:0003006,GO:0003674,GO:0005488,GO:0005515,GO:0005524,GO:0005575,GO:0005622,GO:0005623,GO:0005634,GO:0005654,GO:0005737,GO:0005773,GO:0006139,GO:0006325,GO:0006338,GO:0006725,GO:0006732,GO:0006753,GO:0006793,GO:0006796,GO:0006807,GO:0006873,GO:0006874,GO:0006875,GO:0006950,GO:0006952,GO:0006996,GO:0007154,GO:0007165,GO:0007275,GO:0007623,GO:…	-	ko:K12119	ko04712,map04712	-	-	-	ko00000,ko00001	-	-	-	DNA_photolyase,FAD_binding_7
XP_028072993.1	4081.Solyc04g054510.2.1	4.52e-59	184.0	COG1594@1|root,KOG2907@2759|Eukaryota,37VWR@33090|Viridiplantae,3GKAJ@35493|Streptophyta,44K9P@71274|asterids	35493|Streptophyta	K	DNA-dependent RNA polymerase catalyzes the transcription of DNA into RNA using the four ribonucleoside triphosphates as substrates	-	-	-	ko:K03000	ko00230,ko00240,ko01100,ko03020,map00230,map00240,map01100,map03020	M00182	R00435,R00441,R00442,R00443	RC02795	br01611,ko00000,ko00001,ko00002,ko03021	-	-	-	TFIIS_C
XP_028115103.1	71139.XP_010030074.1	1.56e-64	229.0	2AG8Y@1|root,2RYZD@2759|Eukaryota,37TRP@33090|Viridiplantae,3GI0E@35493|Streptophyta	35493|Streptophyta	-	-	-	-	-	-	-	-	-	-	-	-	-	-	-
XP_028112328.1	29760.VIT_15s0021g01640.t01	1.64e-169	480.0	KOG2800@1|root,KOG2800@2759|Eukaryota,37ME3@33090|Viridiplantae,3GF2V@35493|Streptophyta	35493|Streptophyta	S	UPF0565 protein C2orf69 homolog	-	-	-	-	-	-	-	-	-	-	-	-	UPF0565
XP_028081050.1	3760.EMJ12933	2.69e-253	701.0	COG1239@1|root,2QRUY@2759|Eukaryota,37HFP@33090|Viridiplantae,3GFY9@35493|Streptophyta,4JD71@91835|fabids	35493|Streptophyta	F	Involved in chlorophyll biosynthesis. Catalyzes the insertion of magnesium ion into protoporphyrin IX to yield Mg- protoporphyrin IX	CHLI	GO:0003674,GO:0003824,GO:0005575,GO:0005618,GO:0005622,GO:0005623,GO:0005737,GO:0006725,GO:0006778,GO:0006779,GO:0006807,GO:0008150,GO:0008152,GO:0009058,GO:0009507,GO:0009532,GO:0009536,GO:0009570,GO:0009719,GO:0009725,GO:0009735,GO:0009987,GO:0010007,GO:0010033,GO:0015994,GO:0015995,GO:0016462,GO:0016787,GO:0016817,GO:0016818,GO:0016851,GO:0016874,GO:0016887,GO:0017111,GO:0018130,GO:0019438,GO:…	6.6.1.1	ko:K03405	ko00860,ko01100,ko01110,map00860,map01100,map01110	-	R03877	RC01012	ko00000,ko00001,ko01000	-	-	-	Mg_chelatase
XP_028064762.1	4098.XP_009591982.1	3.66e-270	760.0	28I7G@1|root,2QQHQ@2759|Eukaryota,37RPF@33090|Viridiplantae,3GCJX@35493|Streptophyta,44DZM@71274|asterids	35493|Streptophyta	-	-	-	-	-	-	-	-	-	-	-	-	-	-	-
XP_028057963.1	2711.XP_006491177.1	1.15e-145	415.0	COG0094@1|root,KOG0398@2759|Eukaryota,37HPD@33090|Viridiplantae,3GGBY@35493|Streptophyta	35493|Streptophyta	J	50S ribosomal protein L5	-	GO:0000027,GO:0003674,GO:0003676,GO:0003723,GO:0003735,GO:0005198,GO:0005488,GO:0005575,GO:0005622,GO:0005623,GO:0005737,GO:0005829,GO:0005840,GO:0006412,GO:0006518,GO:0006807,GO:0006996,GO:0008150,GO:0008152,GO:0009058,GO:0009059,GO:0009507,GO:0009526,GO:0009532,GO:0009536,GO:0009570,GO:0009719,GO:0009725,GO:0009735,GO:0009941,GO:0009987,GO:0010033,GO:0010467,GO:0016020,GO:0016043,GO:0019538,GO:…	-	ko:K02931	ko03010,map03010	M00178,M00179	-	-	br01610,ko00000,ko00001,ko00002,ko03011	-	-	-	Ribosomal_L5,Ribosomal_L5_C
XP_028078697.1	29760.VIT_04s0008g00190.t01	1.31e-262	734.0	KOG1400@1|root,KOG1400@2759|Eukaryota,37PRJ@33090|Viridiplantae,3GCKZ@35493|Streptophyta	35493|Streptophyta	S	ATP-dependent protease La	-	GO:0000151,GO:0002009,GO:0005575,GO:0005622,GO:0005623,GO:0005634,GO:0005737,GO:0006464,GO:0006508,GO:0006511,GO:0006807,GO:0007275,GO:0007423,GO:0008150,GO:0008152,GO:0009056,GO:0009057,GO:0009653,GO:0009790,GO:0009887,GO:0009888,GO:0009987,GO:0010498,GO:0016567,GO:0019538,GO:0019941,GO:0030163,GO:0031461,GO:0031464,GO:0032446,GO:0032501,GO:0032502,GO:0032991,GO:0033333,GO:0033334,GO:0033339,GO:…	-	ko:K11793	-	-	-	-	ko00000,ko04121	-	-	-	LON_substr_bdg,Yippee-Mis18
XP_028099856.1	4155.Migut.C01346.1.p	1.08e-70	215.0	2AJHF@1|root,2RZ75@2759|Eukaryota,37UF7@33090|Viridiplantae,3GIKP@35493|Streptophyta,44JQW@71274|asterids	35493|Streptophyta	-	-	-	-	-	-	-	-	-	-	-	-	-	-	-
XP_028079388.1	29760.VIT_19s0014g04680.t01	1.09e-225	630.0	KOG0282@1|root,KOG0282@2759|Eukaryota,37MF3@33090|Viridiplantae,3GA07@35493|Streptophyta	35493|Streptophyta	S	WD repeat-containing protein	-	-	-	-	-	-	-	-	-	-	-	-	WD40
XP_028094208.1	29760.VIT_13s0019g04930.t01	7.01e-142	407.0	COG0200@1|root,KOG0846@2759|Eukaryota,37QWE@33090|Viridiplantae,3GCAP@35493|Streptophyta	35493|Streptophyta	J	RIBOSOMAL protein	-	-	-	ko:K02876	ko03010,map03010	M00178,M00179	-	-	br01610,ko00000,ko00001,ko00002,ko03011	-	-	-	Ribosomal_L27A
XP_028055256.1	3641.EOY03914	0.0	1072.0	COG5535@1|root,KOG2179@2759|Eukaryota,37Q33@33090|Viridiplantae,3G857@35493|Streptophyta	35493|Streptophyta	L	DNA repair protein	-	GO:0000109,GO:0000111,GO:0000217,GO:0000404,GO:0000405,GO:0000715,GO:0003674,GO:0003676,GO:0003677,GO:0003684,GO:0003690,GO:0003697,GO:0005488,GO:0005575,GO:0005622,GO:0005623,GO:0005634,GO:0005654,GO:0005730,GO:0005737,GO:0005739,GO:0005886,GO:0006139,GO:0006259,GO:0006281,GO:0006289,GO:0006294,GO:0006298,GO:0006725,GO:0006807,GO:0006950,GO:0006974,GO:0006996,GO:0007346,GO:0008150,GO:0008152,GO:…	-	ko:K10838	ko03420,map03420	-	-	-	ko00000,ko00001,ko03400	-	-	-	BHD_1,BHD_2,BHD_3,Rad4,Transglut_core
XP_028077040.1	3649.evm.model.supercontig_60.57	1.92e-71	223.0	2CXQS@1|root,2RZ37@2759|Eukaryota,37UHD@33090|Viridiplantae,3GIRE@35493|Streptophyta,3HZZ0@3699|Brassicales	35493|Streptophyta	S	Late embryogenesis abundant protein	-	-	-	-	-	-	-	-	-	-	-	-	LEA_2
XP_028085682.1	29760.VIT_01s0026g01720.t01	1.12e-119	350.0	28JD3@1|root,2QRRY@2759|Eukaryota,37MMD@33090|Viridiplantae,3G9EN@35493|Streptophyta	35493|Streptophyta	K	Single-stranded DNA-binding protein WHY1	WHY1	GO:0000018,GO:0000229,GO:0003674,GO:0003676,GO:0003677,GO:0003697,GO:0003700,GO:0003723,GO:0003729,GO:0005488,GO:0005575,GO:0005622,GO:0005623,GO:0005694,GO:0005737,GO:0006139,GO:0006259,GO:0006281,GO:0006355,GO:0006725,GO:0006807,GO:0006950,GO:0006952,GO:0006974,GO:0008150,GO:0008152,GO:0009295,GO:0009507,GO:0009508,GO:0009532,GO:0009536,GO:0009570,GO:0009605,GO:0009607,GO:0009620,GO:0009889,GO:…	-	-	-	-	-	-	-	-	-	-	Whirly
XP_028062246.1	29760.VIT_18s0001g04140.t01	1.4e-211	598.0	COG0666@1|root,KOG2319@2759|Eukaryota,37HIB@33090|Viridiplantae,3GG5M@35493|Streptophyta	35493|Streptophyta	U	Vacuolar protein sorting-associated protein	-	-	-	ko:K20131	-	-	-	-	ko00000,ko04131	-	-	-	VPS9
XP_028112057.1	3988.XP_002514929.1	2.31e-241	676.0	COG1162@1|root,2QRR1@2759|Eukaryota,37R7H@33090|Viridiplantae,3G9BW@35493|Streptophyta,4JFZD@91835|fabids	35493|Streptophyta	S	ribosome biogenesis GTPase	-	-	3.1.3.100	ko:K06949	ko00730,ko01100,map00730,map01100	-	R00615,R02135	RC00002,RC00017	ko00000,ko00001,ko01000,ko03009	-	-	-	RsgA_GTPase
XP_028054100.1	225117.XP_009365153.1	1.98e-147	420.0	COG2453@1|root,KOG1716@2759|Eukaryota,37SDC@33090|Viridiplantae,3G98K@35493|Streptophyta,4JGVP@91835|fabids	35493|Streptophyta	V	Protein-tyrosine-phosphatase	IBR5	GO:0000188,GO:0001101,GO:0001558,GO:0001932,GO:0001933,GO:0003674,GO:0003824,GO:0004721,GO:0005575,GO:0005622,GO:0005623,GO:0005634,GO:0006464,GO:0006469,GO:0006470,GO:0006793,GO:0006796,GO:0006807,GO:0007154,GO:0007165,GO:0008150,GO:0008152,GO:0009719,GO:0009725,GO:0009733,GO:0009737,GO:0009892,GO:0009966,GO:0009968,GO:0009987,GO:0010033,GO:0010563,GO:0010605,GO:0010646,GO:0010648,GO:0016311,GO:…	3.1.3.16,3.1.3.48	ko:K04459	ko04010,map04010	-	-	-	ko00000,ko00001,ko01000,ko01009	-	-	-	DSPc
XP_028083010.1	29760.VIT_04s0008g04410.t01	0.0	1295.0	COG0443@1|root,KOG0103@2759|Eukaryota,KOG0104@2759|Eukaryota,37N3B@33090|Viridiplantae,3GCND@35493|Streptophyta	35493|Streptophyta	O	Belongs to the heat shock protein 70 family	-	GO:0005575,GO:0005622,GO:0005623,GO:0005737,GO:0005773,GO:0005774,GO:0005783,GO:0005794,GO:0009507,GO:0009536,GO:0012505,GO:0016020,GO:0031090,GO:0043226,GO:0043227,GO:0043229,GO:0043231,GO:0044422,GO:0044424,GO:0044437,GO:0044444,GO:0044446,GO:0044464,GO:0098588,GO:0098805	-	ko:K09486	ko04141,map04141	-	-	-	ko00000,ko00001,ko03110	-	-	-	HSP70
XP_028115968.1	29760.VIT_00s0332g00050.t01	2.68e-30	118.0	2D599@1|root,2SXTF@2759|Eukaryota,381XR@33090|Viridiplantae,3GS06@35493|Streptophyta	35493|Streptophyta	-	-	-	-	-	-	-	-	-	-	-	-	-	-	-
XP_028092474.1	29760.VIT_08s0007g07290.t01	1.16e-140	399.0	COG5053@1|root,KOG1669@2759|Eukaryota,37KVB@33090|Viridiplantae,3GGRQ@35493|Streptophyta	35493|Streptophyta	J	Belongs to the eukaryotic initiation factor 4E family	NCBP	-	-	ko:K03259	ko01521,ko03013,ko04066,ko04150,ko04151,ko04211,ko04910,map01521,map03013,map04066,map04150,map04151,map04211,map04910	M00428	-	-	ko00000,ko00001,ko00002,ko03012,ko03019	-	-	-	IF4E
XP_028085898.1	4081.Solyc11g005900.1.1	9.29e-143	411.0	COG0194@1|root,KOG0707@2759|Eukaryota,37RE3@33090|Viridiplantae,3G9GT@35493|Streptophyta,44FID@71274|asterids	35493|Streptophyta	F	Guanylate kinase homologues.	-	GO:0003674,GO:0003824,GO:0004385,GO:0005575,GO:0005622,GO:0005623,GO:0005737,GO:0005739,GO:0005829,GO:0006139,GO:0006163,GO:0006725,GO:0006753,GO:0006793,GO:0006796,GO:0006807,GO:0008150,GO:0008152,GO:0009058,GO:0009116,GO:0009117,GO:0009119,GO:0009123,GO:0009126,GO:0009132,GO:0009135,GO:0009150,GO:0009161,GO:0009165,GO:0009167,GO:0009179,GO:0009185,GO:0009259,GO:0009507,GO:0009536,GO:0009987,GO:…	2.7.4.8	ko:K00942	ko00230,ko01100,map00230,map01100	M00050	R00332,R02090	RC00002	ko00000,ko00001,ko00002,ko01000	-	-	-	Guanylate_kin
XP_028090879.1	225117.XP_009367756.1	1.35e-115	336.0	28N4S@1|root,2QUPY@2759|Eukaryota,37RVC@33090|Viridiplantae,3GD0B@35493|Streptophyta,4JFRS@91835|fabids	35493|Streptophyta	S	Heme-binding protein	-	-	-	-	-	-	-	-	-	-	-	-	SOUL
XP_028109251.1	29760.VIT_10s0071g00310.t01	4.3e-128	382.0	KOG1947@1|root,KOG1947@2759|Eukaryota,37JFW@33090|Viridiplantae,3G8X9@35493|Streptophyta	35493|Streptophyta	P	F-box LRR-repeat protein	-	-	-	ko:K10268	-	-	-	-	ko00000,ko04121	-	-	-	LRR_6
XP_028109673.1	29730.Gorai.004G112700.1	9.09e-45	153.0	2D9TS@1|root,2S5ED@2759|Eukaryota,37W0P@33090|Viridiplantae,3GKPB@35493|Streptophyta	35493|Streptophyta	S	Bifunctional inhibitor lipid-transfer protein seed storage 2S albumin superfamily protein	-	-	-	-	-	-	-	-	-	-	-	-	LTP_2
XP_028091671.1	4155.Migut.G00117.1.p	2.86e-79	239.0	29YBJ@1|root,2RXVT@2759|Eukaryota,37U09@33090|Viridiplantae,3GI7V@35493|Streptophyta	35493|Streptophyta	S	Major allergen Pru ar 1-like	-	-	-	-	-	-	-	-	-	-	-	-	Bet_v_1
XP_028064543.1	29760.VIT_13s0156g00220.t01	4.42e-151	434.0	28JTU@1|root,2QS7T@2759|Eukaryota,37NHK@33090|Viridiplantae,3GEVG@35493|Streptophyta	35493|Streptophyta	S	PRLI-interacting factor	-	-	-	-	-	-	-	-	-	-	-	-	-
XP_028058977.1	29760.VIT_07s0005g01120.t01	0.0	1359.0	28KA1@1|root,2QSQU@2759|Eukaryota,37SD9@33090|Viridiplantae,3G8AR@35493|Streptophyta	35493|Streptophyta	S	Protein FAR1-RELATED SEQUENCE 11-like	-	-	-	-	-	-	-	-	-	-	-	-	FAR1,MULE,SWIM
XP_028119788.1	3750.XP_008342139.1	0.0	928.0	2C9GG@1|root,2QPPK@2759|Eukaryota,37MF0@33090|Viridiplantae,3GGU9@35493|Streptophyta,4JKKN@91835|fabids	35493|Streptophyta	-	-	-	-	-	-	-	-	-	-	-	-	-	-	-
XP_028067608.1	29760.VIT_01s0011g06550.t01	0.0	1603.0	COG0025@1|root,KOG1965@2759|Eukaryota,37RQ7@33090|Viridiplantae,3G72M@35493|Streptophyta	35493|Streptophyta	P	Sodium hydrogen exchanger	SOS1	-	-	-	-	-	-	-	-	-	-	-	Na_H_Exchanger,cNMP_binding
XP_028124289.1	4096.XP_009782273.1	0.0	1505.0	28JTE@1|root,2QUZB@2759|Eukaryota,37R76@33090|Viridiplantae,3GC08@35493|Streptophyta,44FDB@71274|asterids	35493|Streptophyta	S	Protein of unknown function (DUF2921)	-	-	-	-	-	-	-	-	-	-	-	-	DUF2921
XP_028071678.1	3641.EOY04092	2.06e-37	131.0	2CFXU@1|root,2S3JQ@2759|Eukaryota,37W6B@33090|Viridiplantae,3GKMJ@35493|Streptophyta	35493|Streptophyta	-	-	-	-	-	-	-	-	-	-	-	-	-	-	-
XP_028091396.1	4096.XP_009783126.1	2.18e-177	515.0	2CN7D@1|root,2QUBQ@2759|Eukaryota,37SPM@33090|Viridiplantae,3G8HC@35493|Streptophyta,44GCF@71274|asterids	35493|Streptophyta	-	-	-	-	-	-	-	-	-	-	-	-	-	-	HhH-GPD
XP_028070979.1	4432.XP_010259201.1	1.48e-61	203.0	2CXRA@1|root,2RZ7X@2759|Eukaryota,37UUW@33090|Viridiplantae,3GIKR@35493|Streptophyta	35493|Streptophyta	S	UPF0690 protein C1orf52 homolog	-	-	-	-	-	-	-	-	-	-	-	-	-
XP_028072038.1	4432.XP_010273538.1	1.22e-53	168.0	2C4SI@1|root,2S4AS@2759|Eukaryota,37W5B@33090|Viridiplantae,3GKFG@35493|Streptophyta	35493|Streptophyta	S	fiber protein Fb15	-	-	-	-	-	-	-	-	-	-	-	-	-
XP_028070305.1	85681.XP_006453252.1	3.48e-97	286.0	COG0590@1|root,KOG1018@2759|Eukaryota,37TFQ@33090|Viridiplantae,3GFUV@35493|Streptophyta	35493|Streptophyta	F	tRNA-specific adenosine deaminase	-	GO:0003674,GO:0003824,GO:0004000,GO:0005575,GO:0005622,GO:0005623,GO:0005634,GO:0005737,GO:0006139,GO:0006396,GO:0006399,GO:0006400,GO:0006725,GO:0006807,GO:0008033,GO:0008150,GO:0008152,GO:0008251,GO:0009451,GO:0009987,GO:0010467,GO:0016070,GO:0016787,GO:0016810,GO:0016814,GO:0019239,GO:0032991,GO:0034470,GO:0034641,GO:0034660,GO:0043170,GO:0043226,GO:0043227,GO:0043229,GO:0043231,GO:0043412,GO:…	-	ko:K15441	-	-	-	-	ko00000,ko01000,ko03016	-	-	-	dCMP_cyt_deam_1
XP_028112407.1	29760.VIT_06s0004g07140.t01	2.02e-95	280.0	COG5596@1|root,KOG3225@2759|Eukaryota,37NXU@33090|Viridiplantae,3GIH7@35493|Streptophyta	35493|Streptophyta	U	Mitochondrial import inner membrane translocase subunit	-	GO:0000003,GO:0003006,GO:0007275,GO:0008104,GO:0008150,GO:0009790,GO:0009791,GO:0009793,GO:0010154,GO:0022414,GO:0032501,GO:0032502,GO:0033036,GO:0033365,GO:0034613,GO:0048316,GO:0048608,GO:0048731,GO:0048856,GO:0051179,GO:0051641,GO:0061458,GO:0070727	-	ko:K17790	-	-	-	-	ko00000,ko02000,ko03029	3.A.8.1	-	-	Tim17
XP_028104979.1	4432.XP_010275832.1	7.03e-41	142.0	2CRJC@1|root,2S47G@2759|Eukaryota,37W36@33090|Viridiplantae,3GKDY@35493|Streptophyta	35493|Streptophyta	S	Preprotein translocase subunit	-	GO:0005575,GO:0005622,GO:0005623,GO:0005737,GO:0009507,GO:0009534,GO:0009535,GO:0009536,GO:0009579,GO:0016020,GO:0031976,GO:0031984,GO:0034357,GO:0042651,GO:0043226,GO:0043227,GO:0043229,GO:0043231,GO:0044422,GO:0044424,GO:0044434,GO:0044435,GO:0044436,GO:0044444,GO:0044446,GO:0044464,GO:0055035	-	-	-	-	-	-	-	-	-	-	SecE
XP_028051095.1	29730.Gorai.006G101400.1	8.64e-29	109.0	2E2E8@1|root,2S9N3@2759|Eukaryota,37WNF@33090|Viridiplantae,3GKY6@35493|Streptophyta	35493|Streptophyta	-	-	-	-	-	-	-	-	-	-	-	-	-	-	-
XP_028122058.1	3760.EMJ06787	1.82e-165	471.0	COG0564@1|root,KOG1919@2759|Eukaryota,37PUS@33090|Viridiplantae,3GBP5@35493|Streptophyta,4JJ18@91835|fabids	35493|Streptophyta	A	synthase	-	GO:0001522,GO:0003674,GO:0003824,GO:0005575,GO:0005622,GO:0005623,GO:0005737,GO:0005739,GO:0006139,GO:0006396,GO:0006399,GO:0006400,GO:0006725,GO:0006807,GO:0008033,GO:0008150,GO:0008152,GO:0009451,GO:0009982,GO:0009987,GO:0010467,GO:0016070,GO:0016853,GO:0016866,GO:0031119,GO:0034470,GO:0034641,GO:0034660,GO:0043170,GO:0043226,GO:0043227,GO:0043229,GO:0043231,GO:0043412,GO:0044237,GO:0044238,GO:…	3.4.21.53	ko:K08675	-	-	-	-	ko00000,ko01000,ko01002,ko03029	-	-	-	PseudoU_synth_2
XP_028126693.1	4096.XP_009779238.1	1.48e-228	639.0	28HV8@1|root,2QQ67@2759|Eukaryota,37NGN@33090|Viridiplantae,3G8Y3@35493|Streptophyta,44GXQ@71274|asterids	35493|Streptophyta	-	-	-	-	-	-	-	-	-	-	-	-	-	-	-
XP_028089165.1	3983.cassava4.1_012345m	3.48e-184	516.0	COG0676@1|root,KOG1594@2759|Eukaryota,37KPR@33090|Viridiplantae,3GD5F@35493|Streptophyta,4JK9C@91835|fabids	35493|Streptophyta	G	Belongs to the glucose-6-phosphate 1-epimerase family	-	-	5.1.3.15	ko:K01792	ko00010,ko01100,ko01110,ko01120,ko01130,map00010,map01100,map01110,map01120,map01130	-	R02739	RC00563	ko00000,ko00001,ko01000	-	-	-	Aldose_epim
XP_028068039.1	3983.cassava4.1_000066m	0.0	2031.0	COG1231@1|root,KOG0029@2759|Eukaryota,37KUS@33090|Viridiplantae,3GFTA@35493|Streptophyta,4JJS9@91835|fabids	35493|Streptophyta	Q	Lysine-specific histone	-	GO:0005575,GO:0005622,GO:0005623,GO:0005634,GO:0006325,GO:0006464,GO:0006476,GO:0006479,GO:0006807,GO:0006996,GO:0007275,GO:0008150,GO:0008152,GO:0008213,GO:0009987,GO:0016043,GO:0016569,GO:0016570,GO:0016571,GO:0016575,GO:0018022,GO:0018193,GO:0018205,GO:0019538,GO:0022622,GO:0032259,GO:0032501,GO:0032502,GO:0034968,GO:0035601,GO:0036211,GO:0043170,GO:0043226,GO:0043227,GO:0043229,GO:0043231,GO:…	-	ko:K11450	ko04714,map04714	-	-	-	ko00000,ko00001,ko01000,ko03036	-	-	-	Amino_oxidase,SWIRM
XP_028113095.1	3694.POPTR_0018s03500.1	2.37e-72	223.0	KOG3305@1|root,KOG3305@2759|Eukaryota,37UP3@33090|Viridiplantae,3GIMI@35493|Streptophyta,4JPCA@91835|fabids	35493|Streptophyta	S	peptidyl-tRNA hydrolase	-	-	-	-	-	-	-	-	-	-	-	-	PTH2
XP_028099633.1	4432.XP_010255684.1	2.99e-210	593.0	KOG0621@1|root,KOG0621@2759|Eukaryota,37S9V@33090|Viridiplantae,3GCX5@35493|Streptophyta	35493|Streptophyta	M	Belongs to the phospholipid scramblase family	-	-	-	-	-	-	-	-	-	-	-	-	Scramblase
XP_028060994.1	4432.XP_010255103.1	6.47e-151	439.0	2CMNV@1|root,2QR41@2759|Eukaryota,37V3B@33090|Viridiplantae,3G8WB@35493|Streptophyta	35493|Streptophyta	-	-	-	-	3.4.21.89	ko:K03100	ko02024,ko03060,map02024,map03060	-	-	-	ko00000,ko00001,ko01000,ko01002	-	-	-	-
XP_028093905.1	29760.VIT_01s0010g03570.t01	1.94e-210	597.0	COG5190@1|root,KOG1605@2759|Eukaryota,37ST7@33090|Viridiplantae,3GF45@35493|Streptophyta	35493|Streptophyta	K	CTD small phosphatase-like protein	-	-	-	ko:K17616	-	-	-	-	ko00000,ko01000,ko01009	-	-	-	NIF
XP_028119810.1	4096.XP_009758403.1	3.89e-238	674.0	KOG0167@1|root,KOG0167@2759|Eukaryota,37HUT@33090|Viridiplantae,3GESK@35493|Streptophyta,44H19@71274|asterids	35493|Streptophyta	S	V-ATPase subunit H	-	GO:0005575,GO:0005622,GO:0005623,GO:0005634,GO:0043226,GO:0043227,GO:0043229,GO:0043231,GO:0044424,GO:0044464	-	-	-	-	-	-	-	-	-	-	Arm
XP_028083377.1	4432.XP_010244670.1	1.76e-111	369.0	KOG1327@1|root,KOG1327@2759|Eukaryota,37MKV@33090|Viridiplantae,3G9QY@35493|Streptophyta	33090|Viridiplantae	T	BONZAI 3-like	-	GO:0005575,GO:0005623,GO:0005886,GO:0008150,GO:0009987,GO:0010118,GO:0010941,GO:0016020,GO:0044464,GO:0048519,GO:0048523,GO:0050789,GO:0050794,GO:0060548,GO:0065007,GO:0071944,GO:0090332	-	-	-	-	-	-	-	-	-	-	C2,Copine
XP_028123409.1	29730.Gorai.006G180000.1	1.9e-251	701.0	COG0524@1|root,KOG2855@2759|Eukaryota,37HQG@33090|Viridiplantae,3G84K@35493|Streptophyta	35493|Streptophyta	G	Fructokinase-like 1	-	GO:0003674,GO:0005488,GO:0005515,GO:0005575,GO:0005622,GO:0005623,GO:0005634,GO:0005737,GO:0006139,GO:0006351,GO:0006725,GO:0006807,GO:0006996,GO:0008150,GO:0008152,GO:0009058,GO:0009059,GO:0009295,GO:0009507,GO:0009532,GO:0009536,GO:0009570,GO:0009657,GO:0009658,GO:0009987,GO:0010467,GO:0016043,GO:0016070,GO:0018130,GO:0019438,GO:0032774,GO:0034641,GO:0034645,GO:0034654,GO:0042644,GO:0042646,GO:…	-	-	-	-	-	-	-	-	-	-	PfkB,SOUL
YP_007317288.1	4081.Solyc01g007610.2.1	2.86e-73	230.0	COG0091@1|root,KOG1711@2759|Eukaryota,3842X@33090|Viridiplantae,3GW7N@35493|Streptophyta,44TSR@71274|asterids	35493|Streptophyta	J	Ribosomal protein L22p/L17e	-	GO:0000313,GO:0000315,GO:0002181,GO:0003674,GO:0003735,GO:0005198,GO:0005575,GO:0005622,GO:0005623,GO:0005737,GO:0005739,GO:0005759,GO:0005761,GO:0005762,GO:0005829,GO:0005840,GO:0006412,GO:0006518,GO:0006807,GO:0008150,GO:0008152,GO:0009058,GO:0009059,GO:0009507,GO:0009536,GO:0009987,GO:0010467,GO:0015934,GO:0015935,GO:0019538,GO:0022626,GO:0022627,GO:0031974,GO:0032991,GO:0034641,GO:0034645,GO:…	-	ko:K02982	ko03010,map03010	M00178,M00179	-	-	br01610,ko00000,ko00001,ko00002,ko03011	-	-	-	Ribosomal_L22
YP_007317286.1	3702.ATCG00790.1	3.74e-85	251.0	COG0197@1|root,KOG3422@2759|Eukaryota,37UTS@33090|Viridiplantae,3GIPW@35493|Streptophyta	35493|Streptophyta	J	Belongs to the universal ribosomal protein uL16 family	rpl16	GO:0003674,GO:0003676,GO:0003723,GO:0003735,GO:0005198,GO:0005488,GO:0005575,GO:0005622,GO:0005623,GO:0005737,GO:0005829,GO:0005840,GO:0009507,GO:0009526,GO:0009532,GO:0009536,GO:0009570,GO:0009941,GO:0015934,GO:0019843,GO:0022625,GO:0022626,GO:0031967,GO:0031975,GO:0032991,GO:0043226,GO:0043227,GO:0043228,GO:0043229,GO:0043231,GO:0043232,GO:0044391,GO:0044422,GO:0044424,GO:0044434,GO:0044435,GO:…	-	ko:K02878	ko03010,map03010	M00178	-	-	br01610,ko00000,ko00001,ko00002,ko03011	-	-	-	Ribosomal_L16
YP_007317287.1	3702.ATCG00800.1	3.61e-137	390.0	COG0092@1|root,2QV63@2759|Eukaryota,37ITR@33090|Viridiplantae,3GH7T@35493|Streptophyta,3HXHY@3699|Brassicales	35493|Streptophyta	J	Belongs to the universal ribosomal protein uS3 family	rps3	GO:0002181,GO:0005575,GO:0005622,GO:0005623,GO:0005737,GO:0005829,GO:0005840,GO:0006412,GO:0006518,GO:0006807,GO:0008150,GO:0008152,GO:0009058,GO:0009059,GO:0009295,GO:0009507,GO:0009526,GO:0009532,GO:0009536,GO:0009570,GO:0009941,GO:0009987,GO:0010467,GO:0015935,GO:0016020,GO:0019538,GO:0022626,GO:0022627,GO:0031967,GO:0031975,GO:0032991,GO:0034641,GO:0034645,GO:0043043,GO:0043170,GO:0043226,GO:…	-	ko:K02982	ko03010,map03010	M00178,M00179	-	-	br01610,ko00000,ko00001,ko00002,ko03011	-	-	-	Ribosomal_S3_C
XP_028098235.1	4155.Migut.B00957.1.p	5.37e-297	825.0	KOG2601@1|root,KOG2601@2759|Eukaryota,37PEX@33090|Viridiplantae,3GAYU@35493|Streptophyta,44GTR@71274|asterids	35493|Streptophyta	P	Ferroportin1 (FPN1)	-	GO:0003674,GO:0005215,GO:0005575,GO:0005622,GO:0005623,GO:0005737,GO:0006873,GO:0006875,GO:0006879,GO:0008150,GO:0009507,GO:0009526,GO:0009536,GO:0009941,GO:0009987,GO:0019725,GO:0030003,GO:0031967,GO:0031975,GO:0042592,GO:0043226,GO:0043227,GO:0043229,GO:0043231,GO:0044422,GO:0044424,GO:0044434,GO:0044435,GO:0044444,GO:0044446,GO:0044464,GO:0046916,GO:0048878,GO:0050801,GO:0055065,GO:0055072,GO:…	-	ko:K14685	ko04216,ko04978,map04216,map04978	-	-	-	ko00000,ko00001,ko02000	2.A.100.1	-	-	FPN1
XP_028093717.1	29760.VIT_08s0007g07970.t01	5.85e-263	748.0	KOG0589@1|root,KOG0589@2759|Eukaryota,37QPD@33090|Viridiplantae,3GCMD@35493|Streptophyta	35493|Streptophyta	T	serine threonine-protein kinase	-	GO:0005575,GO:0005622,GO:0005623,GO:0005737,GO:0044424,GO:0044464	2.7.11.1	ko:K08857	-	-	-	-	ko00000,ko01000,ko01001,ko03036,ko03400	-	-	-	Pkinase
XP_028110562.1	85681.XP_006438492.1	9.43e-120	355.0	KOG4374@1|root,KOG4374@2759|Eukaryota,37MDM@33090|Viridiplantae,3GCC6@35493|Streptophyta	35493|Streptophyta	A	Sterile alpha motif (SAM) domain-containing protein	-	-	-	-	-	-	-	-	-	-	-	-	SAM_1
XP_028059916.1	3649.evm.model.supercontig_128.13	2.56e-185	524.0	KOG2973@1|root,KOG2973@2759|Eukaryota,37HH1@33090|Viridiplantae,3G7US@35493|Streptophyta,3HRSQ@3699|Brassicales	35493|Streptophyta	S	Domain of unknown function (DUF383)	-	-	-	-	-	-	-	-	-	-	-	-	DUF383,DUF384
XP_028086295.1	29760.VIT_06s0004g06750.t01	0.0	1398.0	KOG0167@1|root,KOG0167@2759|Eukaryota,37NDP@33090|Viridiplantae,3G7I5@35493|Streptophyta	35493|Streptophyta	S	RING-type E3 ubiquitin transferase	-	GO:0005575,GO:0005623,GO:0005886,GO:0016020,GO:0044464,GO:0071944	-	-	-	-	-	-	-	-	-	-	Arm,U-box
XP_028058726.1	4113.PGSC0003DMT400037342	0.0	1248.0	KOG2184@1|root,KOG2184@2759|Eukaryota,37QZT@33090|Viridiplantae,3GGJ3@35493|Streptophyta,44FGJ@71274|asterids	35493|Streptophyta	A	Septin and tuftelin-interacting protein 1 homolog	-	GO:0000228,GO:0000375,GO:0000377,GO:0000390,GO:0000398,GO:0000781,GO:0000784,GO:0003674,GO:0005488,GO:0005575,GO:0005576,GO:0005622,GO:0005623,GO:0005634,GO:0005654,GO:0005681,GO:0005684,GO:0005694,GO:0005730,GO:0005737,GO:0006139,GO:0006396,GO:0006397,GO:0006725,GO:0006807,GO:0008150,GO:0008152,GO:0008380,GO:0009987,GO:0010467,GO:0016043,GO:0016070,GO:0016071,GO:0016604,GO:0016607,GO:0022411,GO:…	-	ko:K13103	-	-	-	-	ko00000,ko03041	-	-	-	G-patch,GCFC,TIP_N
XP_028089146.1	3649.evm.model.supercontig_36.60	1.42e-22	92.8	2C9GW@1|root,2S3YR@2759|Eukaryota,37VYF@33090|Viridiplantae,3GKI3@35493|Streptophyta,3HV2J@3699|Brassicales	35493|Streptophyta	-	-	-	-	-	-	-	-	-	-	-	-	-	-	-
XP_028070933.1	102107.XP_008238675.1	9.69e-65	205.0	2ANPI@1|root,2RZEV@2759|Eukaryota,37UGZ@33090|Viridiplantae,3GIRN@35493|Streptophyta,4JPSI@91835|fabids	35493|Streptophyta	S	Ycf49-like	-	-	-	-	-	-	-	-	-	-	-	-	DUF2499
XP_028092167.1	4113.PGSC0003DMT400054354	3.85e-263	733.0	2CJ1Y@1|root,2QS8P@2759|Eukaryota,37Q71@33090|Viridiplantae,3GHI5@35493|Streptophyta,44DU8@71274|asterids	35493|Streptophyta	S	hmr,ptac12	PTAC12	GO:0000229,GO:0000427,GO:0000428,GO:0003674,GO:0003676,GO:0003677,GO:0003697,GO:0003723,GO:0003727,GO:0005488,GO:0005575,GO:0005622,GO:0005623,GO:0005634,GO:0005694,GO:0005737,GO:0006139,GO:0006351,GO:0006355,GO:0006725,GO:0006807,GO:0008150,GO:0008152,GO:0009058,GO:0009059,GO:0009295,GO:0009314,GO:0009416,GO:0009507,GO:0009508,GO:0009532,GO:0009536,GO:0009628,GO:0009637,GO:0009639,GO:0009889,GO:…	-	-	-	-	-	-	-	-	-	-	-
XP_028084229.1	3659.XP_004153049.1	1.03e-52	181.0	COG2801@1|root,KOG0017@2759|Eukaryota,37YCZ@33090|Viridiplantae,3GMZS@35493|Streptophyta	3659.XP_004153049.1|-	L	Reverse transcriptase (RNA-dependent DNA polymerase)	-	-	-	-	-	-	-	-	-	-	-	-	-
XP_028066094.1	29760.VIT_05s0049g01820.t01	2.21e-218	629.0	28JZ0@1|root,2QSDE@2759|Eukaryota,37PCK@33090|Viridiplantae,3GATV@35493|Streptophyta	35493|Streptophyta	S	Domain of unknown function (DUF3527)	-	-	-	-	-	-	-	-	-	-	-	-	DUF3527
XP_028056589.1	29760.VIT_04s0008g03360.t01	4.58e-153	442.0	KOG4341@1|root,KOG4341@2759|Eukaryota,389MX@33090|Viridiplantae,3GYTH@35493|Streptophyta	35493|Streptophyta	S	F-box LRR-repeat protein 2-like	-	-	-	ko:K10268	-	-	-	-	ko00000,ko04121	-	-	-	LRR_6
XP_028080631.1	4155.Migut.K01104.1.p	4.5e-82	246.0	2CXVI@1|root,2S02B@2759|Eukaryota,37U5P@33090|Viridiplantae,3GX7Y@35493|Streptophyta,44SNN@71274|asterids	35493|Streptophyta	S	Universal stress protein family	-	-	-	-	-	-	-	-	-	-	-	-	Usp
XP_028124686.1	29760.VIT_03s0038g01410.t01	1.28e-159	456.0	COG0580@1|root,KOG0223@2759|Eukaryota,37KFM@33090|Viridiplantae,3GFE2@35493|Streptophyta	35493|Streptophyta	G	Belongs to the MIP aquaporin (TC 1.A.8) family	-	GO:0001101,GO:0003674,GO:0005215,GO:0005372,GO:0005575,GO:0005623,GO:0005886,GO:0005887,GO:0006810,GO:0006811,GO:0006833,GO:0006950,GO:0008150,GO:0009414,GO:0009415,GO:0009628,GO:0010035,GO:0015250,GO:0015267,GO:0015318,GO:0016020,GO:0016021,GO:0022803,GO:0022838,GO:0022857,GO:0031224,GO:0031226,GO:0034220,GO:0042044,GO:0042221,GO:0044425,GO:0044459,GO:0044464,GO:0050896,GO:0051179,GO:0051234,GO:…	-	ko:K09866	ko04962,ko04976,map04962,map04976	-	-	-	ko00000,ko00001,ko02000	1.A.8	-	-	MIP
XP_028121051.1	3760.EMJ09242	4.43e-301	839.0	KOG2344@1|root,KOG2344@2759|Eukaryota,37I3J@33090|Viridiplantae,3GD6Y@35493|Streptophyta,4JMWT@91835|fabids	35493|Streptophyta	U	Exocyst subunit exo70 family protein	-	GO:0000145,GO:0001101,GO:0002237,GO:0002238,GO:0002831,GO:0002833,GO:0003674,GO:0005488,GO:0005515,GO:0005575,GO:0005576,GO:0005615,GO:0005622,GO:0005623,GO:0005634,GO:0005737,GO:0005829,GO:0005886,GO:0005938,GO:0006810,GO:0006887,GO:0006950,GO:0006952,GO:0008150,GO:0009414,GO:0009415,GO:0009605,GO:0009607,GO:0009617,GO:0009620,GO:0009628,GO:0009787,GO:0009789,GO:0009966,GO:0009967,GO:0009987,GO:…	-	ko:K07195	ko04910,map04910	-	-	-	ko00000,ko00001,ko03036,ko04131	-	-	-	Exo70
XP_028125238.1	29760.VIT_01s0026g00640.t01	4.51e-279	780.0	COG0513@1|root,KOG0333@2759|Eukaryota,37IE7@33090|Viridiplantae,3G9SU@35493|Streptophyta	35493|Streptophyta	A	DEAD-box ATP-dependent RNA helicase	-	GO:0003674,GO:0003724,GO:0003824,GO:0004004,GO:0004386,GO:0005575,GO:0005622,GO:0005623,GO:0005634,GO:0005730,GO:0005737,GO:0006139,GO:0006725,GO:0006807,GO:0008026,GO:0008150,GO:0008152,GO:0008186,GO:0009507,GO:0009536,GO:0009987,GO:0010501,GO:0016070,GO:0016462,GO:0016787,GO:0016817,GO:0016818,GO:0016887,GO:0017111,GO:0031974,GO:0031981,GO:0034641,GO:0042623,GO:0043170,GO:0043226,GO:0043227,GO:…	-	-	-	-	-	-	-	-	-	-	DEAD,Helicase_C
XP_028068658.1	29760.VIT_09s0002g02510.t01	0.0	1210.0	28JWI@1|root,2QSAQ@2759|Eukaryota,37JX6@33090|Viridiplantae,3GFWZ@35493|Streptophyta	35493|Streptophyta	S	Occludin homology domain	-	-	-	ko:K11807	-	-	-	-	ko00000,ko04121	-	-	-	Occludin_ELL
XP_028086560.1	29760.VIT_15s0024g00350.t01	0.0	3174.0	KOG0392@1|root,KOG0392@2759|Eukaryota,37KEK@33090|Viridiplantae,3GGRG@35493|Streptophyta	35493|Streptophyta	K	TATA-binding protein-associated factor	BTAF1	GO:0003674,GO:0003700,GO:0005575,GO:0005622,GO:0005623,GO:0005634,GO:0005654,GO:0006355,GO:0008150,GO:0009889,GO:0009890,GO:0009892,GO:0010468,GO:0010556,GO:0010558,GO:0010605,GO:0010629,GO:0019219,GO:0019222,GO:0031323,GO:0031324,GO:0031326,GO:0031327,GO:0031974,GO:0031981,GO:0035561,GO:0035562,GO:0043226,GO:0043227,GO:0043229,GO:0043231,GO:0043233,GO:0044092,GO:0044422,GO:0044424,GO:0044428,GO:…	-	ko:K15192	-	-	-	-	ko00000,ko01000,ko03021	-	-	-	DUF3535,HEAT,HEAT_EZ,Helicase_C,SNF2_N
XP_028099696.1	4096.XP_009788084.1	1.89e-57	181.0	2CRID@1|root,2S47D@2759|Eukaryota,37VGB@33090|Viridiplantae,3GK2U@35493|Streptophyta,44M4S@71274|asterids	35493|Streptophyta	-	-	-	-	-	-	-	-	-	-	-	-	-	-	-
XP_028067694.1	102107.XP_008245001.1	2.35e-170	486.0	28JE5@1|root,2QRT5@2759|Eukaryota,37I9E@33090|Viridiplantae,3GD0J@35493|Streptophyta,4JJUX@91835|fabids	35493|Streptophyta	-	-	-	-	-	-	-	-	-	-	-	-	-	-	-
XP_028074842.1	29760.VIT_00s0415g00040.t01	0.0	950.0	28JC1@1|root,2QRQZ@2759|Eukaryota,37ISR@33090|Viridiplantae,3GDPC@35493|Streptophyta	35493|Streptophyta	S	glycine-rich protein	-	GO:0005575,GO:0005623,GO:0005886,GO:0006950,GO:0006970,GO:0008150,GO:0009628,GO:0009787,GO:0009966,GO:0009987,GO:0010646,GO:0010928,GO:0016020,GO:0023051,GO:0033554,GO:0044464,GO:0048580,GO:0048583,GO:0050789,GO:0050793,GO:0050794,GO:0050896,GO:0051239,GO:0051716,GO:0065007,GO:0071214,GO:0071470,GO:0071944,GO:0104004,GO:1901419,GO:1905957,GO:2000026,GO:2000028,GO:2000241	-	-	-	-	-	-	-	-	-	-	GRDP-like
XP_028120854.1	3760.EMJ10522	1.82e-128	375.0	28XPX@1|root,2R4H7@2759|Eukaryota,37RP8@33090|Viridiplantae,3GC16@35493|Streptophyta,4JG14@91835|fabids	35493|Streptophyta	-	-	-	-	-	-	-	-	-	-	-	-	-	-	-
XP_028071443.1	2711.XP_006492194.1	2.22e-208	625.0	28PVX@1|root,2QQ93@2759|Eukaryota,37J52@33090|Viridiplantae,3GCZP@35493|Streptophyta	35493|Streptophyta	S	XS domain	-	-	-	-	-	-	-	-	-	-	-	-	XS
XP_028109816.1	4098.XP_009622377.1	1.29e-22	94.0	2BGVM@1|root,2S1AC@2759|Eukaryota,37W0V@33090|Viridiplantae,3GJPT@35493|Streptophyta,44KKT@71274|asterids	35493|Streptophyta	-	-	-	-	-	-	-	-	-	-	-	-	-	-	-
XP_028087210.1	29760.VIT_01s0011g01270.t01	2.61e-51	164.0	2CMN8@1|root,2S3YI@2759|Eukaryota,37W03@33090|Viridiplantae,3GK56@35493|Streptophyta	35493|Streptophyta	S	Required for the assembly of the V0 complex of the vacuolar ATPase (V-ATPase) in the endoplasmic reticulum	-	-	-	-	-	-	-	-	-	-	-	-	VMA21
XP_028116067.1	102107.XP_008231521.1	9.03e-72	236.0	2CRDK@1|root,2R7RY@2759|Eukaryota,37T2W@33090|Viridiplantae,3GH4W@35493|Streptophyta,4JPHH@91835|fabids	35493|Streptophyta	-	-	-	-	-	-	-	-	-	-	-	-	-	-	-
XP_028087996.1	29760.VIT_00s0531g00030.t01	6.84e-90	266.0	KOG1030@1|root,KOG1030@2759|Eukaryota,37TQJ@33090|Viridiplantae,3GI65@35493|Streptophyta	35493|Streptophyta	S	ADP-ribosylation factor GTPase-activating protein	-	GO:0003674,GO:0005096,GO:0005488,GO:0005543,GO:0005575,GO:0005622,GO:0005623,GO:0005634,GO:0005737,GO:0005773,GO:0005886,GO:0007275,GO:0008047,GO:0008150,GO:0008289,GO:0009555,GO:0009787,GO:0009789,GO:0009966,GO:0009967,GO:0010646,GO:0010647,GO:0016020,GO:0023051,GO:0023056,GO:0030234,GO:0030695,GO:0032501,GO:0032502,GO:0043085,GO:0043087,GO:0043167,GO:0043168,GO:0043226,GO:0043227,GO:0043229,GO:…	-	-	-	-	-	-	-	-	-	-	C2
XP_028109128.1	4096.XP_009803153.1	5.42e-45	171.0	2C6KD@1|root,2S30F@2759|Eukaryota,37VWG@33090|Viridiplantae,3GJR7@35493|Streptophyta,44RDX@71274|asterids	35493|Streptophyta	K	DNA-binding domain in plant proteins such as APETALA2 and EREBPs	-	GO:0001067,GO:0001101,GO:0003674,GO:0003676,GO:0003677,GO:0003700,GO:0005488,GO:0005575,GO:0005622,GO:0005623,GO:0005634,GO:0006355,GO:0006950,GO:0006970,GO:0008150,GO:0009266,GO:0009408,GO:0009414,GO:0009415,GO:0009628,GO:0009651,GO:0009889,GO:0009891,GO:0009893,GO:0009987,GO:0010035,GO:0010468,GO:0010556,GO:0010557,GO:0010604,GO:0010628,GO:0019219,GO:0019222,GO:0031323,GO:0031325,GO:0031326,GO:…	-	-	-	-	-	-	-	-	-	-	AP2
XP_028117897.1	3988.XP_002513901.1	3.95e-95	296.0	KOG1267@1|root,KOG1267@2759|Eukaryota,37QKH@33090|Viridiplantae,3GGYQ@35493|Streptophyta,4JTSM@91835|fabids	35493|Streptophyta	K	mTERF	-	-	-	ko:K15032	-	-	-	-	ko00000,ko03012,ko03029	-	-	-	mTERF
XP_028118672.1	2711.XP_006492991.1	1.16e-115	357.0	KOG4197@1|root,KOG4197@2759|Eukaryota,37NZ3@33090|Viridiplantae,3GH7Z@35493|Streptophyta	35493|Streptophyta	S	Pentatricopeptide repeat-containing protein At4g14190	-	GO:0003674,GO:0003676,GO:0003723,GO:0003824,GO:0004518,GO:0004519,GO:0005488,GO:0005575,GO:0005622,GO:0005623,GO:0006139,GO:0006725,GO:0006807,GO:0008150,GO:0008152,GO:0009451,GO:0009987,GO:0016070,GO:0016787,GO:0016788,GO:0034641,GO:0043170,GO:0043226,GO:0043227,GO:0043229,GO:0043231,GO:0043412,GO:0044237,GO:0044238,GO:0044424,GO:0044464,GO:0046483,GO:0071704,GO:0090304,GO:0090305,GO:0097159,GO:…	-	-	-	-	-	-	-	-	-	-	PPR,PPR_2,PPR_3
XP_028096761.1	3649.evm.model.supercontig_64.60	5.57e-133	383.0	KOG4186@1|root,KOG4186@2759|Eukaryota,37I6G@33090|Viridiplantae,3GCG9@35493|Streptophyta,3HP4W@3699|Brassicales	35493|Streptophyta	U	Peroxisomal membrane protein	-	GO:0003674,GO:0005488,GO:0005515,GO:0005575,GO:0005622,GO:0005623,GO:0005737,GO:0005777,GO:0005778,GO:0005779,GO:0006996,GO:0007031,GO:0008150,GO:0009987,GO:0016020,GO:0016021,GO:0016043,GO:0016559,GO:0031090,GO:0031224,GO:0031231,GO:0031300,GO:0031301,GO:0031903,GO:0032535,GO:0042579,GO:0042802,GO:0043226,GO:0043227,GO:0043229,GO:0043231,GO:0044375,GO:0044422,GO:0044424,GO:0044425,GO:0044438,GO:…	-	-	-	-	-	-	-	-	-	-	PEX11
XP_028063467.1	29760.VIT_04s0044g00080.t01	2.3e-163	460.0	KOG4211@1|root,KOG4211@2759|Eukaryota,37KN7@33090|Viridiplantae,3GCYE@35493|Streptophyta	35493|Streptophyta	A	heterogeneous nuclear ribonucleoprotein	-	GO:0003674,GO:0003676,GO:0003723,GO:0003727,GO:0005488,GO:0008150,GO:0010468,GO:0019219,GO:0019222,GO:0031323,GO:0043484,GO:0050789,GO:0050794,GO:0051171,GO:0051252,GO:0060255,GO:0065007,GO:0080090,GO:0097159,GO:1901363	-	ko:K12898	-	-	-	-	ko00000,ko03041	-	-	-	RRM_1
XP_028064282.1	3641.EOY30867	0.0	892.0	COG0489@1|root,KOG3022@2759|Eukaryota,37NNC@33090|Viridiplantae,3G7TV@35493|Streptophyta	35493|Streptophyta	D	fe-S cluster assembly factor HCF101	HCF101	GO:0003674,GO:0005488,GO:0005575,GO:0005622,GO:0005623,GO:0005737,GO:0006790,GO:0008150,GO:0008152,GO:0009507,GO:0009532,GO:0009536,GO:0009570,GO:0009987,GO:0016043,GO:0016226,GO:0022607,GO:0031163,GO:0043226,GO:0043227,GO:0043229,GO:0043231,GO:0044085,GO:0044237,GO:0044422,GO:0044424,GO:0044434,GO:0044435,GO:0044444,GO:0044446,GO:0044464,GO:0048037,GO:0051186,GO:0051536,GO:0051540,GO:0071840	-	-	-	-	-	-	-	-	-	-	DUF971,FeS_assembly_P,ParA
XP_028108204.1	29760.VIT_09s0002g06320.t01	0.0	1496.0	KOG4658@1|root,KOG4658@2759|Eukaryota,37IN9@33090|Viridiplantae,3GA7W@35493|Streptophyta	35493|Streptophyta	T	NB-ARC domain	-	GO:0002238,GO:0005575,GO:0005623,GO:0005886,GO:0006950,GO:0006952,GO:0007154,GO:0007165,GO:0008150,GO:0009605,GO:0009607,GO:0009620,GO:0009987,GO:0010033,GO:0016020,GO:0023052,GO:0042221,GO:0043207,GO:0044464,GO:0050789,GO:0050794,GO:0050832,GO:0050896,GO:0051704,GO:0051707,GO:0051716,GO:0065007,GO:0071944,GO:0098542	-	-	-	-	-	-	-	-	-	-	NB-ARC
XP_028079010.1	3760.EMJ11621	0.0	1863.0	KOG0667@1|root,KOG0667@2759|Eukaryota,37HW0@33090|Viridiplantae,3GDEN@35493|Streptophyta,4JJSK@91835|fabids	35493|Streptophyta	T	Protein kinase domain	-	GO:0005575,GO:0005622,GO:0005623,GO:0005737,GO:0044424,GO:0044464	-	-	-	-	-	-	-	-	-	-	Pkinase
XP_028086391.1	3641.EOY16061	0.0	2040.0	COG1112@1|root,KOG1801@2759|Eukaryota,37K93@33090|Viridiplantae,3G9HR@35493|Streptophyta	35493|Streptophyta	A	helicase	-	-	-	ko:K10706	-	-	-	-	ko00000,ko01000,ko03021	-	-	-	AAA_11,AAA_12,Cytochrom_B561
XP_028092793.1	3649.evm.model.supercontig_1.39	1.95e-117	340.0	28IIS@1|root,2QQVS@2759|Eukaryota,37HSH@33090|Viridiplantae,3GBGW@35493|Streptophyta,3HSYE@3699|Brassicales	35493|Streptophyta	S	Protein of unknown function (DUF1218)	-	-	-	-	-	-	-	-	-	-	-	-	DUF1218
XP_028078808.1	3641.EOY01363	5.69e-115	348.0	COG5169@1|root,KOG0627@2759|Eukaryota,37NQ1@33090|Viridiplantae,3GDIP@35493|Streptophyta	35493|Streptophyta	K	Heat Stress Transcription Factor	-	GO:0003674,GO:0003700,GO:0006355,GO:0008150,GO:0009889,GO:0010468,GO:0010556,GO:0019219,GO:0019222,GO:0031323,GO:0031326,GO:0050789,GO:0050794,GO:0051171,GO:0051252,GO:0060255,GO:0065007,GO:0080090,GO:0140110,GO:1903506,GO:2000112,GO:2001141	-	ko:K09419	-	-	-	-	ko00000,ko03000	-	-	-	HSF_DNA-bind
XP_028104514.1	4098.XP_009617096.1	6.26e-165	472.0	KOG4293@1|root,KOG4293@2759|Eukaryota,37N2H@33090|Viridiplantae,3GHF9@35493|Streptophyta,44Q3Q@71274|asterids	35493|Streptophyta	T	Possible catecholamine-binding domain present in a variety of eukaryotic proteins.	-	-	-	-	-	-	-	-	-	-	-	-	Cytochrom_B561,DOMON
XP_028053546.1	29760.VIT_18s0001g09200.t01	0.0	1517.0	28PX7@1|root,2QWJS@2759|Eukaryota,37JJP@33090|Viridiplantae,3G9RR@35493|Streptophyta	35493|Streptophyta	-	-	-	-	-	ko:K18667	-	-	-	-	ko00000	-	-	-	RRM_1,SPOC
XP_028081737.1	29760.VIT_14s0060g00110.t01	0.0	1248.0	COG0008@1|root,KOG1147@2759|Eukaryota,37Q9I@33090|Viridiplantae,3GA4G@35493|Streptophyta	35493|Streptophyta	J	Belongs to the class-I aminoacyl-tRNA synthetase family	-	GO:0002181,GO:0002376,GO:0003674,GO:0003676,GO:0003723,GO:0003824,GO:0004812,GO:0004818,GO:0004827,GO:0005488,GO:0005515,GO:0005575,GO:0005622,GO:0005623,GO:0005737,GO:0005829,GO:0005886,GO:0006082,GO:0006139,GO:0006399,GO:0006412,GO:0006417,GO:0006418,GO:0006424,GO:0006433,GO:0006518,GO:0006520,GO:0006725,GO:0006807,GO:0006810,GO:0006811,GO:0006820,GO:0006869,GO:0006950,GO:0006952,GO:0006955,GO:…	6.1.1.17	ko:K01885	ko00860,ko00970,ko01100,ko01110,ko01120,map00860,map00970,map01100,map01110,map01120	M00121,M00359,M00360	R05578	RC00055,RC00523	ko00000,ko00001,ko00002,ko01000,ko01007,ko02048,ko03016	-	-	-	GST_C,GST_C_3,tRNA-synt_1c,tRNA-synt_1c_C
XP_028119455.1	71139.XP_010065463.1	2.2e-147	422.0	28N8I@1|root,2QUTT@2759|Eukaryota,37M13@33090|Viridiplantae,3GA83@35493|Streptophyta	35493|Streptophyta	S	Vesicle transport protein	-	-	-	ko:K08497	ko04130,map04130	-	-	-	ko00000,ko00001,ko04131	-	-	-	Sec20
XP_028055840.1	3983.cassava4.1_032691m	1.18e-199	575.0	KOG1166@1|root,KOG1166@2759|Eukaryota,37M41@33090|Viridiplantae,3GEFJ@35493|Streptophyta,4JG8Y@91835|fabids	35493|Streptophyta	D	Mad3/BUB1 hoMad3/BUB1 homology region 1	-	-	-	-	-	-	-	-	-	-	-	-	Mad3_BUB1_I
XP_028066141.1	29760.VIT_13s0067g00390.t01	3.61e-244	686.0	COG0750@1|root,2QVZT@2759|Eukaryota,37N20@33090|Viridiplantae,3GAJT@35493|Streptophyta	35493|Streptophyta	M	zinc metalloprotease EGY2 chloroplastic	EGY2	GO:0005575,GO:0005622,GO:0005623,GO:0005737,GO:0009507,GO:0009534,GO:0009535,GO:0009536,GO:0009579,GO:0016020,GO:0031976,GO:0031984,GO:0034357,GO:0042651,GO:0043226,GO:0043227,GO:0043229,GO:0043231,GO:0044422,GO:0044424,GO:0044434,GO:0044435,GO:0044436,GO:0044444,GO:0044446,GO:0044464,GO:0055035	-	-	-	-	-	-	-	-	-	-	-
XP_028107907.1	29760.VIT_12s0034g01810.t01	2.86e-195	556.0	COG3145@1|root,KOG4176@2759|Eukaryota,37IQV@33090|Viridiplantae,3GB59@35493|Streptophyta	35493|Streptophyta	L	and Fe(II)-dependent oxygenase superfamily protein	-	-	1.14.11.53	ko:K10767	-	-	-	-	ko00000,ko01000	-	-	-	2OG-FeII_Oxy_2
XP_028071819.1	102107.XP_008232986.1	1.71e-48	155.0	COG0271@1|root,KOG3348@2759|Eukaryota,37WCE@33090|Viridiplantae,3GKD8@35493|Streptophyta,4JQKQ@91835|fabids	35493|Streptophyta	T	Belongs to the BolA IbaG family	-	GO:0005575,GO:0005622,GO:0005623,GO:0005634,GO:0005737,GO:0005829,GO:0006950,GO:0006979,GO:0008150,GO:0010035,GO:0010038,GO:0010039,GO:0042221,GO:0043226,GO:0043227,GO:0043229,GO:0043231,GO:0044424,GO:0044444,GO:0044464,GO:0050896	-	-	-	-	-	-	-	-	-	-	BolA
XP_028056568.1	29760.VIT_04s0008g03300.t01	5.8e-125	360.0	2AKTQ@1|root,2RZA9@2759|Eukaryota,37RZR@33090|Viridiplantae,3GHGX@35493|Streptophyta	35493|Streptophyta	O	Mitogen-activated protein kinase kinase kinase	-	GO:0000165,GO:0000186,GO:0000209,GO:0001932,GO:0001934,GO:0003674,GO:0003824,GO:0004672,GO:0004674,GO:0004706,GO:0004709,GO:0004842,GO:0005488,GO:0005515,GO:0005575,GO:0005622,GO:0005623,GO:0005737,GO:0006355,GO:0006357,GO:0006464,GO:0006468,GO:0006508,GO:0006511,GO:0006793,GO:0006796,GO:0006807,GO:0006950,GO:0006970,GO:0007154,GO:0007165,GO:0007254,GO:0007256,GO:0007346,GO:0008150,GO:0008152,GO:…	-	-	-	-	-	-	-	-	-	-	SWIM,zf-RING_2
XP_028098211.1	29760.VIT_01s0150g00430.t01	5.7e-121	352.0	COG0398@1|root,KOG3140@2759|Eukaryota,37I6X@33090|Viridiplantae,3GBPS@35493|Streptophyta	35493|Streptophyta	S	SNARE associated Golgi protein	-	-	-	-	-	-	-	-	-	-	-	-	SNARE_assoc
XP_028063047.1	3641.EOX93767	6.46e-114	332.0	2CN55@1|root,2QTY1@2759|Eukaryota,37NYD@33090|Viridiplantae,3GG4E@35493|Streptophyta	35493|Streptophyta	-	-	-	-	-	-	-	-	-	-	-	-	-	-	-
XP_028057807.1	3760.EMJ26324	0.0	1007.0	28JX3@1|root,2QSBB@2759|Eukaryota,37QK9@33090|Viridiplantae,3GCWZ@35493|Streptophyta,4JK4D@91835|fabids	35493|Streptophyta	S	Pentatricopeptide repeat-containing protein	-	GO:0003674,GO:0003676,GO:0003723,GO:0003824,GO:0004518,GO:0004519,GO:0005488,GO:0005575,GO:0005622,GO:0005623,GO:0006139,GO:0006725,GO:0006807,GO:0008150,GO:0008152,GO:0009451,GO:0009987,GO:0016070,GO:0016787,GO:0016788,GO:0034641,GO:0043170,GO:0043226,GO:0043227,GO:0043229,GO:0043231,GO:0043412,GO:0044237,GO:0044238,GO:0044424,GO:0044464,GO:0046483,GO:0071704,GO:0090304,GO:0090305,GO:0097159,GO:…	-	-	-	-	-	-	-	-	-	-	PPR,PPR_2,PPR_3
XP_028078738.1	29760.VIT_07s0005g00620.t01	0.0	1097.0	COG5644@1|root,KOG2172@2759|Eukaryota,37I2R@33090|Viridiplantae,3GB7F@35493|Streptophyta	35493|Streptophyta	T	U3 small nucleolar RNA-associated protein	-	GO:0000154,GO:0000447,GO:0000460,GO:0000462,GO:0000466,GO:0000469,GO:0000472,GO:0000478,GO:0000479,GO:0000480,GO:0000966,GO:0000967,GO:0001510,GO:0005575,GO:0005622,GO:0005623,GO:0005634,GO:0005654,GO:0005730,GO:0006139,GO:0006364,GO:0006396,GO:0006725,GO:0006807,GO:0008150,GO:0008152,GO:0009451,GO:0009987,GO:0010467,GO:0016070,GO:0016072,GO:0022613,GO:0030490,GO:0030684,GO:0031167,GO:0031974,GO:…	-	ko:K14567	ko03008,map03008	-	-	-	ko00000,ko00001,ko03009	-	-	-	Utp14
XP_028096562.1	29760.VIT_18s0001g04190.t01	3.5e-114	339.0	COG0576@1|root,KOG3003@2759|Eukaryota,37INI@33090|Viridiplantae,3GCCY@35493|Streptophyta	35493|Streptophyta	O	Essential component of the PAM complex, a complex required for the translocation of transit peptide-containing proteins from the inner membrane into the mitochondrial matrix in an ATP-dependent manner	-	-	-	ko:K03687	-	-	-	-	ko00000,ko03029,ko03110	-	-	-	GrpE
XP_028084607.1	29760.VIT_18s0122g00410.t01	1.93e-162	537.0	2CMB0@1|root,2QPUC@2759|Eukaryota,37P0S@33090|Viridiplantae,3G7C6@35493|Streptophyta	35493|Streptophyta	S	single fertilization	-	-	-	-	-	-	-	-	-	-	-	-	-
XP_028063493.1	3988.XP_002516094.1	0.0	956.0	KOG2069@1|root,KOG2069@2759|Eukaryota,37SHY@33090|Viridiplantae,3GFRB@35493|Streptophyta,4JI5R@91835|fabids	35493|Streptophyta	U	Conserved oligomeric Golgi complex subunit	-	-	-	ko:K20295	-	-	-	-	ko00000,ko04131	-	-	-	Dor1
XP_028121636.1	4432.XP_010264758.1	2.26e-153	441.0	28JB2@1|root,2QVAY@2759|Eukaryota,37RX8@33090|Viridiplantae,3GAQI@35493|Streptophyta	35493|Streptophyta	S	PDDEXK-like family of unknown function	-	-	-	-	-	-	-	-	-	-	-	-	PDDEXK_6
XP_028121126.1	29760.VIT_06s0061g00090.t01	0.0	1108.0	COG0484@1|root,KOG0550@2759|Eukaryota,37HFU@33090|Viridiplantae,3G9NB@35493|Streptophyta	35493|Streptophyta	O	DnaJ homolog, subfamily C, member	-	GO:0001671,GO:0003674,GO:0005488,GO:0005515,GO:0005575,GO:0005622,GO:0005623,GO:0005634,GO:0005654,GO:0005737,GO:0005829,GO:0006457,GO:0006458,GO:0008047,GO:0008150,GO:0009987,GO:0030234,GO:0031072,GO:0031974,GO:0031981,GO:0032781,GO:0043085,GO:0043226,GO:0043227,GO:0043229,GO:0043231,GO:0043233,GO:0043462,GO:0044093,GO:0044422,GO:0044424,GO:0044428,GO:0044444,GO:0044446,GO:0044464,GO:0048583,GO:…	-	ko:K09527	-	-	-	-	ko00000,ko03110	-	-	-	DnaJ,TPR_8
XP_028063538.1	102107.XP_008244576.1	1.36e-20	90.5	28NEG@1|root,2QS93@2759|Eukaryota,37I5D@33090|Viridiplantae,3GG6N@35493|Streptophyta,4JKH7@91835|fabids	35493|Streptophyta	S	Protein STAY-GREEN LIKE	-	GO:0006996,GO:0008150,GO:0009657,GO:0009658,GO:0009987,GO:0016043,GO:0071840	4.99.1.10	ko:K22013	ko00860,ko01110,map00860,map01110	-	R08584,R09033	RC01012	ko00000,ko00001,ko01000	-	-	-	Staygreen
XP_028096332.1	981085.XP_010112308.1	2.53e-85	264.0	KOG3004@1|root,KOG3004@2759|Eukaryota,37KH8@33090|Viridiplantae,3GDF9@35493|Streptophyta,4JI6P@91835|fabids	35493|Streptophyta	D	Chromosome segregation in meiosis protein 3-like	-	GO:0000075,GO:0000076,GO:0000077,GO:0000228,GO:0000278,GO:0000785,GO:0000790,GO:0003674,GO:0003676,GO:0003677,GO:0005488,GO:0005575,GO:0005622,GO:0005623,GO:0005634,GO:0005654,GO:0005657,GO:0005694,GO:0006139,GO:0006259,GO:0006260,GO:0006261,GO:0006275,GO:0006725,GO:0006807,GO:0006950,GO:0006974,GO:0007049,GO:0007093,GO:0007346,GO:0008150,GO:0008152,GO:0008156,GO:0008284,GO:0009058,GO:0009059,GO:…	-	ko:K10904	-	-	-	-	ko00000,ko03400	-	-	-	Swi3,zf-CCHC
XP_028071706.1	29760.VIT_12s0059g00260.t01	0.0	1079.0	KOG0495@1|root,KOG0495@2759|Eukaryota,37MES@33090|Viridiplantae,3GGG5@35493|Streptophyta	35493|Streptophyta	A	pre-mRNA-processing factor	-	GO:0000244,GO:0000375,GO:0000377,GO:0000387,GO:0000398,GO:0003674,GO:0003676,GO:0003712,GO:0003713,GO:0003723,GO:0005102,GO:0005488,GO:0005515,GO:0005575,GO:0005622,GO:0005623,GO:0005634,GO:0005654,GO:0005681,GO:0005682,GO:0005684,GO:0006139,GO:0006259,GO:0006304,GO:0006305,GO:0006306,GO:0006355,GO:0006357,GO:0006396,GO:0006397,GO:0006403,GO:0006725,GO:0006807,GO:0006950,GO:0007275,GO:0008134,GO:…	-	ko:K12855	ko03040,map03040	M00354	-	-	ko00000,ko00001,ko00002,ko03041	-	-	-	PRP1_N,TPR_14,TPR_16,TPR_19,TPR_8,ubiquitin
XP_028071980.1	29760.VIT_03s0063g02410.t01	5.51e-277	807.0	COG5259@1|root,KOG1279@2759|Eukaryota,37NUX@33090|Viridiplantae,3G7SQ@35493|Streptophyta	35493|Streptophyta	B	SWI SNF complex subunit	-	-	-	ko:K11649	ko04714,ko05225,map04714,map05225	-	-	-	ko00000,ko00001,ko03021,ko03036	-	-	-	Myb_DNA-binding,SWIRM,SWIRM-assoc_1,ZZ
XP_028097476.1	4432.XP_010250279.1	5.2e-222	620.0	COG1094@1|root,KOG2874@2759|Eukaryota,37QT2@33090|Viridiplantae,3G8BB@35493|Streptophyta	35493|Streptophyta	A	Required for 40S ribosome biogenesis. Involved in nucleolar processing of pre-18S ribosomal RNA and ribosome assembly	-	-	-	ko:K06961	-	-	-	-	ko00000,ko03009	-	-	-	-
XP_028074005.1	4096.XP_009785160.1	4.01e-237	657.0	COG2214@1|root,KOG0691@2759|Eukaryota,37NRP@33090|Viridiplantae,3GA6Y@35493|Streptophyta,44GFX@71274|asterids	35493|Streptophyta	O	Chaperone protein DNAj	-	-	-	-	-	-	-	-	-	-	-	-	DnaJ,DnaJ-X
XP_028063492.1	102107.XP_008244129.1	0.0	984.0	COG0349@1|root,KOG2206@2759|Eukaryota,37J3M@33090|Viridiplantae,3GEDE@35493|Streptophyta,4JI74@91835|fabids	35493|Streptophyta	J	Exosome component 10-like	-	GO:0000175,GO:0000178,GO:0000460,GO:0000785,GO:0000956,GO:0003674,GO:0003824,GO:0004518,GO:0004527,GO:0004532,GO:0004540,GO:0005575,GO:0005622,GO:0005623,GO:0005634,GO:0005694,GO:0005730,GO:0005737,GO:0005829,GO:0006139,GO:0006259,GO:0006304,GO:0006305,GO:0006306,GO:0006364,GO:0006396,GO:0006401,GO:0006402,GO:0006403,GO:0006725,GO:0006807,GO:0007549,GO:0008150,GO:0008152,GO:0008298,GO:0008334,GO:…	-	ko:K12591	ko03018,map03018	-	-	-	ko00000,ko00001,ko01000,ko03019	-	-	-	DNA_pol_A_exo1,HRDC,PMC2NT
XP_028056053.1	3988.XP_002510603.1	4.24e-80	241.0	COG3794@1|root,2RXIY@2759|Eukaryota,37TZA@33090|Viridiplantae,3GI3J@35493|Streptophyta,4JP3N@91835|fabids	35493|Streptophyta	C	Participates in electron transfer between P700 and the cytochrome b6-f complex in photosystem I	PETE	GO:0003674,GO:0003824,GO:0005488,GO:0005515,GO:0005575,GO:0005622,GO:0005623,GO:0005737,GO:0006091,GO:0006417,GO:0008150,GO:0008152,GO:0009055,GO:0009507,GO:0009532,GO:0009534,GO:0009536,GO:0009570,GO:0009579,GO:0009889,GO:0009890,GO:0009892,GO:0009987,GO:0010035,GO:0010038,GO:0010468,GO:0010556,GO:0010558,GO:0010605,GO:0010608,GO:0010629,GO:0016020,GO:0016491,GO:0017148,GO:0019222,GO:0019904,GO:…	-	ko:K02638	ko00195,map00195	-	-	-	ko00000,ko00001,ko00194	-	-	-	Copper-bind
XP_028108199.1	3988.XP_002517598.1	5.3e-155	444.0	COG1794@1|root,2QU3Q@2759|Eukaryota,37M99@33090|Viridiplantae,3GAXU@35493|Streptophyta,4JDW6@91835|fabids	35493|Streptophyta	M	Asp/Glu/Hydantoin racemase	-	-	-	-	-	-	-	-	-	-	-	-	Asp_Glu_race
XP_028055288.1	4113.PGSC0003DMT400074343	1.64e-158	453.0	COG2423@1|root,KOG3007@2759|Eukaryota,37NPE@33090|Viridiplantae,3GEFC@35493|Streptophyta,44E2J@71274|asterids	35493|Streptophyta	E	Ornithine cyclodeaminase/mu-crystallin family	-	GO:0002682,GO:0002684,GO:0002831,GO:0002833,GO:0003674,GO:0003824,GO:0005575,GO:0005622,GO:0005623,GO:0005737,GO:0008150,GO:0008152,GO:0009507,GO:0009536,GO:0010112,GO:0016491,GO:0016638,GO:0016639,GO:0031347,GO:0031349,GO:0032101,GO:0032103,GO:0043226,GO:0043227,GO:0043229,GO:0043231,GO:0043900,GO:0043902,GO:0044424,GO:0044444,GO:0044464,GO:0045088,GO:0045089,GO:0048518,GO:0048583,GO:0048584,GO:…	-	-	-	-	-	-	-	-	-	-	OCD_Mu_crystall
XP_028078722.1	29760.VIT_08s0007g01540.t01	4.72e-173	496.0	COG5147@1|root,KOG0048@2759|Eukaryota,37NC7@33090|Viridiplantae,3GDAQ@35493|Streptophyta	35493|Streptophyta	K	Transcription factor	-	GO:0000981,GO:0000988,GO:0000989,GO:0001067,GO:0001076,GO:0001101,GO:0001134,GO:0001135,GO:0003674,GO:0003676,GO:0003677,GO:0003700,GO:0005488,GO:0005575,GO:0005622,GO:0005623,GO:0005634,GO:0006355,GO:0006357,GO:0006950,GO:0006952,GO:0006970,GO:0008150,GO:0009414,GO:0009415,GO:0009605,GO:0009607,GO:0009617,GO:0009620,GO:0009628,GO:0009651,GO:0009719,GO:0009723,GO:0009725,GO:0009733,GO:0009737,GO:…	-	ko:K09422	-	-	-	-	ko00000,ko03000	-	-	-	Myb_DNA-binding
XP_028103092.1	4098.XP_009594993.1	3.79e-174	491.0	COG3648@1|root,KOG1599@2759|Eukaryota,37MHV@33090|Viridiplantae,3GACE@35493|Streptophyta,44B5A@71274|asterids	35493|Streptophyta	Q	Catalyzes the oxidation of uric acid to 5- hydroxyisourate, which is further processed to form (S)-allantoin	-	GO:0003674,GO:0003824,GO:0004846,GO:0005575,GO:0005622,GO:0005623,GO:0005737,GO:0005777,GO:0006996,GO:0007031,GO:0008150,GO:0008152,GO:0009987,GO:0016043,GO:0016491,GO:0016661,GO:0016663,GO:0042579,GO:0043226,GO:0043227,GO:0043229,GO:0043231,GO:0044424,GO:0044444,GO:0044464,GO:0055114,GO:0071840	1.7.3.3	ko:K00365	ko00230,ko00232,ko01100,ko01120,map00230,map00232,map01100,map01120	M00546	R02106,R07981	RC02107,RC02551	ko00000,ko00001,ko00002,ko01000	-	-	-	Uricase
XP_028092207.1	4081.Solyc07g053290.2.1	1.48e-117	343.0	KOG3561@1|root,KOG3561@2759|Eukaryota,37P01@33090|Viridiplantae,3GHFV@35493|Streptophyta,44JEE@71274|asterids	35493|Streptophyta	K	helix loop helix domain	-	-	-	-	-	-	-	-	-	-	-	-	HLH
XP_028094125.1	29760.VIT_07s0031g01210.t01	5.87e-212	619.0	KOG2416@1|root,KOG2416@2759|Eukaryota,37KXW@33090|Viridiplantae,3GF8I@35493|Streptophyta	35493|Streptophyta	B	Apoptotic chromatin condensation inducer in the	-	GO:0002262,GO:0002376,GO:0002520,GO:0002682,GO:0002684,GO:0002761,GO:0002763,GO:0005575,GO:0005622,GO:0005623,GO:0005634,GO:0005654,GO:0005730,GO:0005737,GO:0005829,GO:0005886,GO:0006323,GO:0006915,GO:0006921,GO:0006996,GO:0007275,GO:0008150,GO:0008219,GO:0009892,GO:0009987,GO:0010468,GO:0010605,GO:0010629,GO:0010941,GO:0010942,GO:0012501,GO:0016020,GO:0016043,GO:0016604,GO:0016607,GO:0019219,GO:…	-	ko:K12875,ko:K15559	ko03013,ko03015,ko03040,map03013,map03015,map03040	M00430	-	-	ko00000,ko00001,ko00002,ko03019,ko03021,ko03041	-	-	-	RSB_motif,SAP
XP_028093147.1	3649.evm.model.supercontig_276.5	2e-82	244.0	2C232@1|root,2RZB4@2759|Eukaryota,37UU5@33090|Viridiplantae,3GIZ6@35493|Streptophyta,3HU2M@3699|Brassicales	35493|Streptophyta	S	NADH dehydrogenase ubiquinone 1 beta subcomplex subunit 8	-	GO:0005575,GO:0005622,GO:0005623,GO:0005737,GO:0005739,GO:0005740,GO:0005743,GO:0005746,GO:0005747,GO:0016020,GO:0019866,GO:0030964,GO:0031090,GO:0031966,GO:0031967,GO:0031975,GO:0032991,GO:0043226,GO:0043227,GO:0043229,GO:0043231,GO:0044422,GO:0044424,GO:0044425,GO:0044429,GO:0044444,GO:0044446,GO:0044455,GO:0044464,GO:0045271,GO:0070469,GO:0098796,GO:0098798,GO:0098800,GO:0098803,GO:1902494,GO:…	-	-	-	-	-	-	-	-	-	-	-
XP_028093820.1	3641.EOX96162	0.0	4449.0	KOG1787@1|root,KOG1787@2759|Eukaryota,37PI6@33090|Viridiplantae,3GF4I@35493|Streptophyta	35493|Streptophyta	U	Beach domain-containing protein	-	GO:0005575,GO:0005623,GO:0005911,GO:0009506,GO:0012505,GO:0030054,GO:0044464,GO:0055044	-	-	-	-	-	-	-	-	-	-	Beach,DUF4704,PH_BEACH,WD40
XP_028068999.1	3760.EMJ16546	9.9e-243	679.0	KOG4197@1|root,KOG4197@2759|Eukaryota,37PVC@33090|Viridiplantae,3GFYV@35493|Streptophyta,4JGEA@91835|fabids	35493|Streptophyta	U	Pentatricopeptide repeat-containing protein At1g77360, mitochondrial-like	-	-	-	-	-	-	-	-	-	-	-	-	PPR,PPR_2
XP_028085233.1	3641.EOY12997	3.21e-19	90.5	KOG1075@1|root,KOG1075@2759|Eukaryota	2759|Eukaryota	E	Ribonuclease H protein	-	-	-	-	-	-	-	-	-	-	-	-	zf-RVT
XP_028053914.1	29760.VIT_17s0000g03270.t01	1.79e-231	645.0	COG4948@1|root,2QU7C@2759|Eukaryota,37SAV@33090|Viridiplantae,3G9Q6@35493|Streptophyta	35493|Streptophyta	M	L-Ala-D L-amino acid	-	GO:0000287,GO:0003674,GO:0003824,GO:0005488,GO:0006518,GO:0006807,GO:0008150,GO:0008152,GO:0009987,GO:0016853,GO:0016854,GO:0016855,GO:0034641,GO:0043167,GO:0043169,GO:0043603,GO:0044237,GO:0046872,GO:0071704,GO:1901564	-	-	-	-	-	-	-	-	-	-	MR_MLE_C,MR_MLE_N
XP_028071657.1	4096.XP_009764115.1	1.09e-167	479.0	COG3491@1|root,KOG0143@2759|Eukaryota,37YIE@33090|Viridiplantae,3GAK7@35493|Streptophyta,44NYW@71274|asterids	35493|Streptophyta	Q	Belongs to the iron ascorbate-dependent oxidoreductase family	-	-	-	ko:K06892	ko00940,ko01110,map00940,map01110	-	R11549	RC00046	ko00000,ko00001,ko01000	-	-	-	2OG-FeII_Oxy,DIOX_N
lcl|ORF7_TRINITY_DN45283_c0_g1_i1_1594_467	4096.XP_009764115.1	1.24e-169	484.0	COG3491@1|root,KOG0143@2759|Eukaryota,37YIE@33090|Viridiplantae,3GAK7@35493|Streptophyta,44NYW@71274|asterids	35493|Streptophyta	Q	Belongs to the iron ascorbate-dependent oxidoreductase family	-	-	-	ko:K06892	ko00940,ko01110,map00940,map01110	-	R11549	RC00046	ko00000,ko00001,ko01000	-	-	-	2OG-FeII_Oxy,DIOX_N
lcl|ORF13_TRINITY_DN10319_c0_g2_i5_1486_365	4096.XP_009764115.1	4.03e-170	485.0	COG3491@1|root,KOG0143@2759|Eukaryota,37YIE@33090|Viridiplantae,3GAK7@35493|Streptophyta,44NYW@71274|asterids	35493|Streptophyta	Q	Belongs to the iron ascorbate-dependent oxidoreductase family	-	-	-	ko:K06892	ko00940,ko01110,map00940,map01110	-	R11549	RC00046	ko00000,ko00001,ko01000	-	-	-	2OG-FeII_Oxy,DIOX_N
lcl|ORF5_TRINITY_DN8958_c0_g1_i4_1366_245	4096.XP_009764115.1	1.09e-167	479.0	COG3491@1|root,KOG0143@2759|Eukaryota,37YIE@33090|Viridiplantae,3GAK7@35493|Streptophyta,44NYW@71274|asterids	35493|Streptophyta	Q	Belongs to the iron ascorbate-dependent oxidoreductase family	-	-	-	ko:K06892	ko00940,ko01110,map00940,map01110	-	R11549	RC00046	ko00000,ko00001,ko01000	-	-	-	2OG-FeII_Oxy,DIOX_N
lcl|ORF1_TRINITY_DN8896_c0_g1_i1_60_1181	4096.XP_009764115.1	3.81e-168	480.0	COG3491@1|root,KOG0143@2759|Eukaryota,37YIE@33090|Viridiplantae,3GAK7@35493|Streptophyta,44NYW@71274|asterids	35493|Streptophyta	Q	Belongs to the iron ascorbate-dependent oxidoreductase family	-	-	-	ko:K06892	ko00940,ko01110,map00940,map01110	-	R11549	RC00046	ko00000,ko00001,ko01000	-	-	-	2OG-FeII_Oxy,DIOX_N
lcl|ORF2_TRINITY_DN73925_c0_g1_i1_443_0	3760.EMJ10874	6.43e-85	253.0	2ABMK@1|root,2RYPG@2759|Eukaryota,37TV6@33090|Viridiplantae,3GF7D@35493|Streptophyta,4JGTR@91835|fabids	35493|Streptophyta	S	HNH nucleases	-	-	-	-	-	-	-	-	-	-	-	-	HNH
lcl|ORF3_TRINITY_DN28651_c0_g1_i1_201_67	2711.XP_006494992.1	1.61e-19	82.8	2ABMK@1|root,2RYPG@2759|Eukaryota,37TV6@33090|Viridiplantae,3GF7D@35493|Streptophyta	35493|Streptophyta	S	HNH endonuclease domain-containing protein	-	-	-	-	-	-	-	-	-	-	-	-	HNH
lcl|ORF1_TRINITY_DN59649_c0_g1_i2_51_584	2711.XP_006494992.1	9.41e-97	284.0	2ABMK@1|root,2RYPG@2759|Eukaryota,37TV6@33090|Viridiplantae,3GF7D@35493|Streptophyta	35493|Streptophyta	S	HNH endonuclease domain-containing protein	-	-	-	-	-	-	-	-	-	-	-	-	HNH
XP_028084458.1	2711.XP_006494992.1	6.46e-96	283.0	2ABMK@1|root,2RYPG@2759|Eukaryota,37TV6@33090|Viridiplantae,3GF7D@35493|Streptophyta	35493|Streptophyta	S	HNH endonuclease domain-containing protein	-	-	-	-	-	-	-	-	-	-	-	-	HNH
lcl|ORF2_TRINITY_DN32690_c0_g1_i1_136_663	3649.evm.model.supercontig_13.303	4.9e-98	287.0	2ABMK@1|root,2RYPG@2759|Eukaryota,37TV6@33090|Viridiplantae,3GF7D@35493|Streptophyta,3HTIP@3699|Brassicales	35493|Streptophyta	S	HNH nucleases	-	-	-	-	-	-	-	-	-	-	-	-	HNH
lcl|ORF1_TRINITY_DN35808_c0_g1_i2_78_605	3649.evm.model.supercontig_13.303	4.9e-98	287.0	2ABMK@1|root,2RYPG@2759|Eukaryota,37TV6@33090|Viridiplantae,3GF7D@35493|Streptophyta,3HTIP@3699|Brassicales	35493|Streptophyta	S	HNH nucleases	-	-	-	-	-	-	-	-	-	-	-	-	HNH
lcl|ORF2_TRINITY_DN73537_c0_g1_i1_97_522	2711.XP_006494992.1	1.92e-89	264.0	2ABMK@1|root,2RYPG@2759|Eukaryota,37TV6@33090|Viridiplantae,3GF7D@35493|Streptophyta	35493|Streptophyta	S	HNH endonuclease domain-containing protein	-	-	-	-	-	-	-	-	-	-	-	-	HNH
lcl|ORF4_TRINITY_DN23450_c0_g1_i1_709_182	3649.evm.model.supercontig_13.303	4.9e-98	287.0	2ABMK@1|root,2RYPG@2759|Eukaryota,37TV6@33090|Viridiplantae,3GF7D@35493|Streptophyta,3HTIP@3699|Brassicales	35493|Streptophyta	S	HNH nucleases	-	-	-	-	-	-	-	-	-	-	-	-	HNH
lcl|ORF23_TRINITY_DN17123_c0_g1_i2_2709_448	29760.VIT_01s0026g01660.t01	0.0	1215.0	COG0366@1|root,KOG0471@2759|Eukaryota,37PQW@33090|Viridiplantae,3G7YE@35493|Streptophyta	35493|Streptophyta	G	alpha-amylase 3	-	GO:0000272,GO:0003674,GO:0003824,GO:0004553,GO:0004556,GO:0005575,GO:0005622,GO:0005623,GO:0005737,GO:0005975,GO:0005976,GO:0005982,GO:0005983,GO:0005984,GO:0005985,GO:0005987,GO:0006073,GO:0008150,GO:0008152,GO:0009056,GO:0009057,GO:0009251,GO:0009311,GO:0009313,GO:0009507,GO:0009532,GO:0009536,GO:0009570,GO:0009987,GO:0016052,GO:0016160,GO:0016787,GO:0016798,GO:0043170,GO:0043226,GO:0043227,GO:…	-	-	-	-	-	-	-	-	-	-	Alpha-amyl_C2,Alpha-amylase
lcl|ORF11_TRINITY_DN7036_c0_g1_i2_3090_391	29760.VIT_01s0026g01660.t01	0.0	1385.0	COG0366@1|root,KOG0471@2759|Eukaryota,37PQW@33090|Viridiplantae,3G7YE@35493|Streptophyta	35493|Streptophyta	G	alpha-amylase 3	-	GO:0000272,GO:0003674,GO:0003824,GO:0004553,GO:0004556,GO:0005575,GO:0005622,GO:0005623,GO:0005737,GO:0005975,GO:0005976,GO:0005982,GO:0005983,GO:0005984,GO:0005985,GO:0005987,GO:0006073,GO:0008150,GO:0008152,GO:0009056,GO:0009057,GO:0009251,GO:0009311,GO:0009313,GO:0009507,GO:0009532,GO:0009536,GO:0009570,GO:0009987,GO:0016052,GO:0016160,GO:0016787,GO:0016798,GO:0043170,GO:0043226,GO:0043227,GO:…	-	-	-	-	-	-	-	-	-	-	Alpha-amyl_C2,Alpha-amylase
lcl|ORF14_TRINITY_DN2193_c0_g1_i6_3115_1163	29760.VIT_01s0026g01660.t01	0.0	1016.0	COG0366@1|root,KOG0471@2759|Eukaryota,37PQW@33090|Viridiplantae,3G7YE@35493|Streptophyta	35493|Streptophyta	G	alpha-amylase 3	-	GO:0000272,GO:0003674,GO:0003824,GO:0004553,GO:0004556,GO:0005575,GO:0005622,GO:0005623,GO:0005737,GO:0005975,GO:0005976,GO:0005982,GO:0005983,GO:0005984,GO:0005985,GO:0005987,GO:0006073,GO:0008150,GO:0008152,GO:0009056,GO:0009057,GO:0009251,GO:0009311,GO:0009313,GO:0009507,GO:0009532,GO:0009536,GO:0009570,GO:0009987,GO:0016052,GO:0016160,GO:0016787,GO:0016798,GO:0043170,GO:0043226,GO:0043227,GO:…	-	-	-	-	-	-	-	-	-	-	Alpha-amyl_C2,Alpha-amylase
XP_028099207.1	29760.VIT_01s0026g01660.t01	0.0	1368.0	COG0366@1|root,KOG0471@2759|Eukaryota,37PQW@33090|Viridiplantae,3G7YE@35493|Streptophyta	35493|Streptophyta	G	alpha-amylase 3	-	GO:0000272,GO:0003674,GO:0003824,GO:0004553,GO:0004556,GO:0005575,GO:0005622,GO:0005623,GO:0005737,GO:0005975,GO:0005976,GO:0005982,GO:0005983,GO:0005984,GO:0005985,GO:0005987,GO:0006073,GO:0008150,GO:0008152,GO:0009056,GO:0009057,GO:0009251,GO:0009311,GO:0009313,GO:0009507,GO:0009532,GO:0009536,GO:0009570,GO:0009987,GO:0016052,GO:0016160,GO:0016787,GO:0016798,GO:0043170,GO:0043226,GO:0043227,GO:…	-	-	-	-	-	-	-	-	-	-	Alpha-amyl_C2,Alpha-amylase
lcl|ORF13_TRINITY_DN1737_c0_g1_i7_2793_532	29760.VIT_01s0026g01660.t01	0.0	1219.0	COG0366@1|root,KOG0471@2759|Eukaryota,37PQW@33090|Viridiplantae,3G7YE@35493|Streptophyta	35493|Streptophyta	G	alpha-amylase 3	-	GO:0000272,GO:0003674,GO:0003824,GO:0004553,GO:0004556,GO:0005575,GO:0005622,GO:0005623,GO:0005737,GO:0005975,GO:0005976,GO:0005982,GO:0005983,GO:0005984,GO:0005985,GO:0005987,GO:0006073,GO:0008150,GO:0008152,GO:0009056,GO:0009057,GO:0009251,GO:0009311,GO:0009313,GO:0009507,GO:0009532,GO:0009536,GO:0009570,GO:0009987,GO:0016052,GO:0016160,GO:0016787,GO:0016798,GO:0043170,GO:0043226,GO:0043227,GO:…	-	-	-	-	-	-	-	-	-	-	Alpha-amyl_C2,Alpha-amylase
lcl|ORF14_TRINITY_DN2589_c1_g1_i12_809_3070	29760.VIT_01s0026g01660.t01	0.0	1217.0	COG0366@1|root,KOG0471@2759|Eukaryota,37PQW@33090|Viridiplantae,3G7YE@35493|Streptophyta	35493|Streptophyta	G	alpha-amylase 3	-	GO:0000272,GO:0003674,GO:0003824,GO:0004553,GO:0004556,GO:0005575,GO:0005622,GO:0005623,GO:0005737,GO:0005975,GO:0005976,GO:0005982,GO:0005983,GO:0005984,GO:0005985,GO:0005987,GO:0006073,GO:0008150,GO:0008152,GO:0009056,GO:0009057,GO:0009251,GO:0009311,GO:0009313,GO:0009507,GO:0009532,GO:0009536,GO:0009570,GO:0009987,GO:0016052,GO:0016160,GO:0016787,GO:0016798,GO:0043170,GO:0043226,GO:0043227,GO:…	-	-	-	-	-	-	-	-	-	-	Alpha-amyl_C2,Alpha-amylase
lcl|ORF12_TRINITY_DN16664_c0_g1_i4_2641_386	29760.VIT_01s0026g01660.t01	0.0	1215.0	COG0366@1|root,KOG0471@2759|Eukaryota,37PQW@33090|Viridiplantae,3G7YE@35493|Streptophyta	35493|Streptophyta	G	alpha-amylase 3	-	GO:0000272,GO:0003674,GO:0003824,GO:0004553,GO:0004556,GO:0005575,GO:0005622,GO:0005623,GO:0005737,GO:0005975,GO:0005976,GO:0005982,GO:0005983,GO:0005984,GO:0005985,GO:0005987,GO:0006073,GO:0008150,GO:0008152,GO:0009056,GO:0009057,GO:0009251,GO:0009311,GO:0009313,GO:0009507,GO:0009532,GO:0009536,GO:0009570,GO:0009987,GO:0016052,GO:0016160,GO:0016787,GO:0016798,GO:0043170,GO:0043226,GO:0043227,GO:…	-	-	-	-	-	-	-	-	-	-	Alpha-amyl_C2,Alpha-amylase
lcl|ORF14_TRINITY_DN489_c0_g1_i2_833_3094	29760.VIT_01s0026g01660.t01	0.0	1219.0	COG0366@1|root,KOG0471@2759|Eukaryota,37PQW@33090|Viridiplantae,3G7YE@35493|Streptophyta	35493|Streptophyta	G	alpha-amylase 3	-	GO:0000272,GO:0003674,GO:0003824,GO:0004553,GO:0004556,GO:0005575,GO:0005622,GO:0005623,GO:0005737,GO:0005975,GO:0005976,GO:0005982,GO:0005983,GO:0005984,GO:0005985,GO:0005987,GO:0006073,GO:0008150,GO:0008152,GO:0009056,GO:0009057,GO:0009251,GO:0009311,GO:0009313,GO:0009507,GO:0009532,GO:0009536,GO:0009570,GO:0009987,GO:0016052,GO:0016160,GO:0016787,GO:0016798,GO:0043170,GO:0043226,GO:0043227,GO:…	-	-	-	-	-	-	-	-	-	-	Alpha-amyl_C2,Alpha-amylase
lcl|ORF7_TRINITY_DN16198_c0_g1_i2_1229_201	29760.VIT_19s0014g05110.t01	4.44e-157	450.0	2CMAC@1|root,2QPSS@2759|Eukaryota,37NUG@33090|Viridiplantae,3GB1V@35493|Streptophyta	35493|Streptophyta	S	Domain of unknown function (DUF1995)	-	-	-	-	-	-	-	-	-	-	-	-	DUF1995
lcl|ORF1_TRINITY_DN16653_c0_g1_i1_57_842	29760.VIT_19s0014g05110.t01	4.87e-104	312.0	2CMAC@1|root,2QPSS@2759|Eukaryota,37NUG@33090|Viridiplantae,3GB1V@35493|Streptophyta	35493|Streptophyta	S	Domain of unknown function (DUF1995)	-	-	-	-	-	-	-	-	-	-	-	-	DUF1995
lcl|ORF1_TRINITY_DN43147_c0_g1_i1_65_1093	29760.VIT_19s0014g05110.t01	1.8e-156	449.0	2CMAC@1|root,2QPSS@2759|Eukaryota,37NUG@33090|Viridiplantae,3GB1V@35493|Streptophyta	35493|Streptophyta	S	Domain of unknown function (DUF1995)	-	-	-	-	-	-	-	-	-	-	-	-	DUF1995
XP_028124608.1	29760.VIT_19s0014g05110.t01	2.55e-156	448.0	2CMAC@1|root,2QPSS@2759|Eukaryota,37NUG@33090|Viridiplantae,3GB1V@35493|Streptophyta	35493|Streptophyta	S	Domain of unknown function (DUF1995)	-	-	-	-	-	-	-	-	-	-	-	-	DUF1995
lcl|ORF8_TRINITY_DN22575_c0_g1_i3_1515_487	29760.VIT_19s0014g05110.t01	4.44e-157	450.0	2CMAC@1|root,2QPSS@2759|Eukaryota,37NUG@33090|Viridiplantae,3GB1V@35493|Streptophyta	35493|Streptophyta	S	Domain of unknown function (DUF1995)	-	-	-	-	-	-	-	-	-	-	-	-	DUF1995
lcl|ORF1_TRINITY_DN8391_c0_g1_i1_90_1118	29760.VIT_19s0014g05110.t01	2.09e-155	446.0	2CMAC@1|root,2QPSS@2759|Eukaryota,37NUG@33090|Viridiplantae,3GB1V@35493|Streptophyta	35493|Streptophyta	S	Domain of unknown function (DUF1995)	-	-	-	-	-	-	-	-	-	-	-	-	DUF1995
lcl|ORF9_TRINITY_DN14495_c0_g1_i3_1390_323	29760.VIT_19s0014g05110.t01	3.62e-157	451.0	2CMAC@1|root,2QPSS@2759|Eukaryota,37NUG@33090|Viridiplantae,3GB1V@35493|Streptophyta	35493|Streptophyta	S	Domain of unknown function (DUF1995)	-	-	-	-	-	-	-	-	-	-	-	-	DUF1995
lcl|ORF1_TRINITY_DN12756_c0_g1_i1_43_1071	29760.VIT_19s0014g05110.t01	8.46e-155	444.0	2CMAC@1|root,2QPSS@2759|Eukaryota,37NUG@33090|Viridiplantae,3GB1V@35493|Streptophyta	35493|Streptophyta	S	Domain of unknown function (DUF1995)	-	-	-	-	-	-	-	-	-	-	-	-	DUF1995
lcl|ORF12_TRINITY_DN6917_c0_g1_i1_3214_263	3641.EOX96964	0.0	1684.0	COG0531@1|root,KOG2082@2759|Eukaryota,37KY8@33090|Viridiplantae,3GC5M@35493|Streptophyta	35493|Streptophyta	P	cation-chloride co-transporter	CCC1	GO:0003674,GO:0005215,GO:0005575,GO:0005622,GO:0005623,GO:0005737,GO:0005768,GO:0005794,GO:0005802,GO:0005886,GO:0006810,GO:0006811,GO:0006812,GO:0006813,GO:0006814,GO:0006820,GO:0006821,GO:0008150,GO:0008324,GO:0008509,GO:0008511,GO:0009674,GO:0009987,GO:0012505,GO:0015075,GO:0015077,GO:0015079,GO:0015081,GO:0015103,GO:0015108,GO:0015291,GO:0015293,GO:0015294,GO:0015296,GO:0015318,GO:0015370,GO:…	-	ko:K13627,ko:K14427	ko04966,map04966	-	-	-	ko00000,ko00001,ko02000	2.A.30.5	-	-	AA_permease,SLC12
lcl|ORF14_TRINITY_DN25651_c0_g1_i14_1567_179	981085.XP_010092665.1	0.0	891.0	COG0531@1|root,KOG2082@2759|Eukaryota,37KY8@33090|Viridiplantae,3GC5M@35493|Streptophyta,4JNQ7@91835|fabids	35493|Streptophyta	P	Cation-chloride cotransporter	CCC1	GO:0003674,GO:0005215,GO:0005575,GO:0005622,GO:0005623,GO:0005737,GO:0005768,GO:0005794,GO:0005802,GO:0005886,GO:0006810,GO:0006811,GO:0006812,GO:0006813,GO:0006814,GO:0006820,GO:0006821,GO:0008150,GO:0008324,GO:0008509,GO:0008511,GO:0009674,GO:0009987,GO:0012505,GO:0015075,GO:0015077,GO:0015079,GO:0015081,GO:0015103,GO:0015108,GO:0015291,GO:0015293,GO:0015294,GO:0015296,GO:0015318,GO:0015370,GO:…	-	ko:K13627,ko:K14427	ko04966,map04966	-	-	-	ko00000,ko00001,ko02000	2.A.30.5	-	-	AA_permease,SLC12
lcl|ORF2_TRINITY_DN4618_c0_g1_i7_1845_3233	981085.XP_010092665.1	0.0	891.0	COG0531@1|root,KOG2082@2759|Eukaryota,37KY8@33090|Viridiplantae,3GC5M@35493|Streptophyta,4JNQ7@91835|fabids	35493|Streptophyta	P	Cation-chloride cotransporter	CCC1	GO:0003674,GO:0005215,GO:0005575,GO:0005622,GO:0005623,GO:0005737,GO:0005768,GO:0005794,GO:0005802,GO:0005886,GO:0006810,GO:0006811,GO:0006812,GO:0006813,GO:0006814,GO:0006820,GO:0006821,GO:0008150,GO:0008324,GO:0008509,GO:0008511,GO:0009674,GO:0009987,GO:0012505,GO:0015075,GO:0015077,GO:0015079,GO:0015081,GO:0015103,GO:0015108,GO:0015291,GO:0015293,GO:0015294,GO:0015296,GO:0015318,GO:0015370,GO:…	-	ko:K13627,ko:K14427	ko04966,map04966	-	-	-	ko00000,ko00001,ko02000	2.A.30.5	-	-	AA_permease,SLC12
XP_028097281.1	3641.EOX96964	0.0	1684.0	COG0531@1|root,KOG2082@2759|Eukaryota,37KY8@33090|Viridiplantae,3GC5M@35493|Streptophyta	35493|Streptophyta	P	cation-chloride co-transporter	CCC1	GO:0003674,GO:0005215,GO:0005575,GO:0005622,GO:0005623,GO:0005737,GO:0005768,GO:0005794,GO:0005802,GO:0005886,GO:0006810,GO:0006811,GO:0006812,GO:0006813,GO:0006814,GO:0006820,GO:0006821,GO:0008150,GO:0008324,GO:0008509,GO:0008511,GO:0009674,GO:0009987,GO:0012505,GO:0015075,GO:0015077,GO:0015079,GO:0015081,GO:0015103,GO:0015108,GO:0015291,GO:0015293,GO:0015294,GO:0015296,GO:0015318,GO:0015370,GO:…	-	ko:K13627,ko:K14427	ko04966,map04966	-	-	-	ko00000,ko00001,ko02000	2.A.30.5	-	-	AA_permease,SLC12
lcl|ORF8_TRINITY_DN7785_c0_g1_i5_1820_3208	981085.XP_010092665.1	0.0	891.0	COG0531@1|root,KOG2082@2759|Eukaryota,37KY8@33090|Viridiplantae,3GC5M@35493|Streptophyta,4JNQ7@91835|fabids	35493|Streptophyta	P	Cation-chloride cotransporter	CCC1	GO:0003674,GO:0005215,GO:0005575,GO:0005622,GO:0005623,GO:0005737,GO:0005768,GO:0005794,GO:0005802,GO:0005886,GO:0006810,GO:0006811,GO:0006812,GO:0006813,GO:0006814,GO:0006820,GO:0006821,GO:0008150,GO:0008324,GO:0008509,GO:0008511,GO:0009674,GO:0009987,GO:0012505,GO:0015075,GO:0015077,GO:0015079,GO:0015081,GO:0015103,GO:0015108,GO:0015291,GO:0015293,GO:0015294,GO:0015296,GO:0015318,GO:0015370,GO:…	-	ko:K13627,ko:K14427	ko04966,map04966	-	-	-	ko00000,ko00001,ko02000	2.A.30.5	-	-	AA_permease,SLC12
lcl|ORF6_TRINITY_DN1140_c0_g2_i7_3075_4463	981085.XP_010092665.1	0.0	891.0	COG0531@1|root,KOG2082@2759|Eukaryota,37KY8@33090|Viridiplantae,3GC5M@35493|Streptophyta,4JNQ7@91835|fabids	35493|Streptophyta	P	Cation-chloride cotransporter	CCC1	GO:0003674,GO:0005215,GO:0005575,GO:0005622,GO:0005623,GO:0005737,GO:0005768,GO:0005794,GO:0005802,GO:0005886,GO:0006810,GO:0006811,GO:0006812,GO:0006813,GO:0006814,GO:0006820,GO:0006821,GO:0008150,GO:0008324,GO:0008509,GO:0008511,GO:0009674,GO:0009987,GO:0012505,GO:0015075,GO:0015077,GO:0015079,GO:0015081,GO:0015103,GO:0015108,GO:0015291,GO:0015293,GO:0015294,GO:0015296,GO:0015318,GO:0015370,GO:…	-	ko:K13627,ko:K14427	ko04966,map04966	-	-	-	ko00000,ko00001,ko02000	2.A.30.5	-	-	AA_permease,SLC12
lcl|ORF16_TRINITY_DN7481_c0_g1_i4_1711_323	981085.XP_010092665.1	0.0	891.0	COG0531@1|root,KOG2082@2759|Eukaryota,37KY8@33090|Viridiplantae,3GC5M@35493|Streptophyta,4JNQ7@91835|fabids	35493|Streptophyta	P	Cation-chloride cotransporter	CCC1	GO:0003674,GO:0005215,GO:0005575,GO:0005622,GO:0005623,GO:0005737,GO:0005768,GO:0005794,GO:0005802,GO:0005886,GO:0006810,GO:0006811,GO:0006812,GO:0006813,GO:0006814,GO:0006820,GO:0006821,GO:0008150,GO:0008324,GO:0008509,GO:0008511,GO:0009674,GO:0009987,GO:0012505,GO:0015075,GO:0015077,GO:0015079,GO:0015081,GO:0015103,GO:0015108,GO:0015291,GO:0015293,GO:0015294,GO:0015296,GO:0015318,GO:0015370,GO:…	-	ko:K13627,ko:K14427	ko04966,map04966	-	-	-	ko00000,ko00001,ko02000	2.A.30.5	-	-	AA_permease,SLC12
lcl|ORF1_TRINITY_DN6849_c0_g5_i1_459_3290	71139.XP_010051971.1	0.0	1651.0	COG0531@1|root,KOG2082@2759|Eukaryota,37KY8@33090|Viridiplantae,3GC5M@35493|Streptophyta	35493|Streptophyta	P	cation-chloride co-transporter	CCC1	GO:0003674,GO:0005215,GO:0005575,GO:0005622,GO:0005623,GO:0005737,GO:0005768,GO:0005794,GO:0005802,GO:0005886,GO:0006810,GO:0006811,GO:0006812,GO:0006813,GO:0006814,GO:0006820,GO:0006821,GO:0008150,GO:0008324,GO:0008509,GO:0008511,GO:0009674,GO:0009987,GO:0012505,GO:0015075,GO:0015077,GO:0015079,GO:0015081,GO:0015103,GO:0015108,GO:0015291,GO:0015293,GO:0015294,GO:0015296,GO:0015318,GO:0015370,GO:…	-	ko:K13627,ko:K14427	ko04966,map04966	-	-	-	ko00000,ko00001,ko02000	2.A.30.5	-	-	AA_permease,SLC12
lcl|ORF1_TRINITY_DN38977_c0_g1_i2_519_1244	3760.EMJ13135	2.37e-130	374.0	2CMXZ@1|root,2QSMC@2759|Eukaryota,37PZ7@33090|Viridiplantae,3G9VK@35493|Streptophyta,4JDT0@91835|fabids	35493|Streptophyta	S	Phospholipase A2 family protein	-	-	-	-	-	-	-	-	-	-	-	-	-
lcl|ORF7_TRINITY_DN7780_c0_g1_i1_961_236	3760.EMJ13135	1.37e-129	372.0	2CMXZ@1|root,2QSMC@2759|Eukaryota,37PZ7@33090|Viridiplantae,3G9VK@35493|Streptophyta,4JDT0@91835|fabids	35493|Streptophyta	S	Phospholipase A2 family protein	-	-	-	-	-	-	-	-	-	-	-	-	-
lcl|ORF7_TRINITY_DN14583_c0_g3_i1_1046_321	3760.EMJ13135	1.12e-128	370.0	2CMXZ@1|root,2QSMC@2759|Eukaryota,37PZ7@33090|Viridiplantae,3G9VK@35493|Streptophyta,4JDT0@91835|fabids	35493|Streptophyta	S	Phospholipase A2 family protein	-	-	-	-	-	-	-	-	-	-	-	-	-
XP_028054051.1	3760.EMJ13135	1.08e-119	347.0	2CMXZ@1|root,2QSMC@2759|Eukaryota,37PZ7@33090|Viridiplantae,3G9VK@35493|Streptophyta,4JDT0@91835|fabids	35493|Streptophyta	S	Phospholipase A2 family protein	-	-	-	-	-	-	-	-	-	-	-	-	-
lcl|ORF10_TRINITY_DN38586_c0_g1_i7_845_120	3760.EMJ13135	1.31e-127	367.0	2CMXZ@1|root,2QSMC@2759|Eukaryota,37PZ7@33090|Viridiplantae,3G9VK@35493|Streptophyta,4JDT0@91835|fabids	35493|Streptophyta	S	Phospholipase A2 family protein	-	-	-	-	-	-	-	-	-	-	-	-	-
lcl|ORF7_TRINITY_DN12156_c0_g1_i1_221_946	3760.EMJ13135	9.65e-130	373.0	2CMXZ@1|root,2QSMC@2759|Eukaryota,37PZ7@33090|Viridiplantae,3G9VK@35493|Streptophyta,4JDT0@91835|fabids	35493|Streptophyta	S	Phospholipase A2 family protein	-	-	-	-	-	-	-	-	-	-	-	-	-
lcl|ORF1_TRINITY_DN12412_c0_g1_i1_186_911	3760.EMJ13135	2.37e-130	374.0	2CMXZ@1|root,2QSMC@2759|Eukaryota,37PZ7@33090|Viridiplantae,3G9VK@35493|Streptophyta,4JDT0@91835|fabids	35493|Streptophyta	S	Phospholipase A2 family protein	-	-	-	-	-	-	-	-	-	-	-	-	-
lcl|ORF4_TRINITY_DN6794_c0_g1_i1_274_999	3760.EMJ13135	1.95e-129	372.0	2CMXZ@1|root,2QSMC@2759|Eukaryota,37PZ7@33090|Viridiplantae,3G9VK@35493|Streptophyta,4JDT0@91835|fabids	35493|Streptophyta	S	Phospholipase A2 family protein	-	-	-	-	-	-	-	-	-	-	-	-	-
lcl|ORF3_TRINITY_DN1207_c0_g1_i2_190_1113	29760.VIT_13s0019g01260.t01	1.28e-191	535.0	KOG1639@1|root,KOG1639@2759|Eukaryota,37NGS@33090|Viridiplantae,3GGMN@35493|Streptophyta	35493|Streptophyta	I	Very-long-chain enoyl-CoA	-	GO:0000038,GO:0000902,GO:0000904,GO:0003674,GO:0003824,GO:0004312,GO:0005575,GO:0005622,GO:0005623,GO:0005737,GO:0005783,GO:0005789,GO:0005886,GO:0006082,GO:0006629,GO:0006631,GO:0006633,GO:0006643,GO:0006665,GO:0006807,GO:0007275,GO:0008150,GO:0008152,GO:0008610,GO:0009058,GO:0009653,GO:0009888,GO:0009922,GO:0009923,GO:0009987,GO:0010025,GO:0010026,GO:0010090,GO:0010091,GO:0010166,GO:0010927,GO:…	1.3.1.93	ko:K10258	ko00062,ko01040,ko01110,ko01212,map00062,map01040,map01110,map01212	M00415	R07761,R09449,R10828	RC00052,RC00120	ko00000,ko00001,ko00002,ko01000,ko01004	-	-	-	Steroid_dh
lcl|ORF6_TRINITY_DN5922_c0_g1_i3_185_1117	29760.VIT_13s0019g01260.t01	6.71e-213	589.0	KOG1639@1|root,KOG1639@2759|Eukaryota,37NGS@33090|Viridiplantae,3GGMN@35493|Streptophyta	35493|Streptophyta	I	Very-long-chain enoyl-CoA	-	GO:0000038,GO:0000902,GO:0000904,GO:0003674,GO:0003824,GO:0004312,GO:0005575,GO:0005622,GO:0005623,GO:0005737,GO:0005783,GO:0005789,GO:0005886,GO:0006082,GO:0006629,GO:0006631,GO:0006633,GO:0006643,GO:0006665,GO:0006807,GO:0007275,GO:0008150,GO:0008152,GO:0008610,GO:0009058,GO:0009653,GO:0009888,GO:0009922,GO:0009923,GO:0009987,GO:0010025,GO:0010026,GO:0010090,GO:0010091,GO:0010166,GO:0010927,GO:…	1.3.1.93	ko:K10258	ko00062,ko01040,ko01110,ko01212,map00062,map01040,map01110,map01212	M00415	R07761,R09449,R10828	RC00052,RC00120	ko00000,ko00001,ko00002,ko01000,ko01004	-	-	-	Steroid_dh
lcl|ORF1_TRINITY_DN11704_c0_g1_i1_180_1103	29760.VIT_13s0019g01260.t01	1.91e-193	540.0	KOG1639@1|root,KOG1639@2759|Eukaryota,37NGS@33090|Viridiplantae,3GGMN@35493|Streptophyta	35493|Streptophyta	I	Very-long-chain enoyl-CoA	-	GO:0000038,GO:0000902,GO:0000904,GO:0003674,GO:0003824,GO:0004312,GO:0005575,GO:0005622,GO:0005623,GO:0005737,GO:0005783,GO:0005789,GO:0005886,GO:0006082,GO:0006629,GO:0006631,GO:0006633,GO:0006643,GO:0006665,GO:0006807,GO:0007275,GO:0008150,GO:0008152,GO:0008610,GO:0009058,GO:0009653,GO:0009888,GO:0009922,GO:0009923,GO:0009987,GO:0010025,GO:0010026,GO:0010090,GO:0010091,GO:0010166,GO:0010927,GO:…	1.3.1.93	ko:K10258	ko00062,ko01040,ko01110,ko01212,map00062,map01040,map01110,map01212	M00415	R07761,R09449,R10828	RC00052,RC00120	ko00000,ko00001,ko00002,ko01000,ko01004	-	-	-	Steroid_dh
XP_028121572.1	29760.VIT_13s0019g01260.t01	4.19e-210	582.0	KOG1639@1|root,KOG1639@2759|Eukaryota,37NGS@33090|Viridiplantae,3GGMN@35493|Streptophyta	35493|Streptophyta	I	Very-long-chain enoyl-CoA	-	GO:0000038,GO:0000902,GO:0000904,GO:0003674,GO:0003824,GO:0004312,GO:0005575,GO:0005622,GO:0005623,GO:0005737,GO:0005783,GO:0005789,GO:0005886,GO:0006082,GO:0006629,GO:0006631,GO:0006633,GO:0006643,GO:0006665,GO:0006807,GO:0007275,GO:0008150,GO:0008152,GO:0008610,GO:0009058,GO:0009653,GO:0009888,GO:0009922,GO:0009923,GO:0009987,GO:0010025,GO:0010026,GO:0010090,GO:0010091,GO:0010166,GO:0010927,GO:…	1.3.1.93	ko:K10258	ko00062,ko01040,ko01110,ko01212,map00062,map01040,map01110,map01212	M00415	R07761,R09449,R10828	RC00052,RC00120	ko00000,ko00001,ko00002,ko01000,ko01004	-	-	-	Steroid_dh
lcl|ORF3_TRINITY_DN10632_c0_g1_i1_187_1119	29760.VIT_13s0019g01260.t01	2.73e-212	587.0	KOG1639@1|root,KOG1639@2759|Eukaryota,37NGS@33090|Viridiplantae,3GGMN@35493|Streptophyta	35493|Streptophyta	I	Very-long-chain enoyl-CoA	-	GO:0000038,GO:0000902,GO:0000904,GO:0003674,GO:0003824,GO:0004312,GO:0005575,GO:0005622,GO:0005623,GO:0005737,GO:0005783,GO:0005789,GO:0005886,GO:0006082,GO:0006629,GO:0006631,GO:0006633,GO:0006643,GO:0006665,GO:0006807,GO:0007275,GO:0008150,GO:0008152,GO:0008610,GO:0009058,GO:0009653,GO:0009888,GO:0009922,GO:0009923,GO:0009987,GO:0010025,GO:0010026,GO:0010090,GO:0010091,GO:0010166,GO:0010927,GO:…	1.3.1.93	ko:K10258	ko00062,ko01040,ko01110,ko01212,map00062,map01040,map01110,map01212	M00415	R07761,R09449,R10828	RC00052,RC00120	ko00000,ko00001,ko00002,ko01000,ko01004	-	-	-	Steroid_dh
lcl|ORF6_TRINITY_DN3075_c0_g1_i9_230_1162	29760.VIT_13s0019g01260.t01	5.75e-214	592.0	KOG1639@1|root,KOG1639@2759|Eukaryota,37NGS@33090|Viridiplantae,3GGMN@35493|Streptophyta	35493|Streptophyta	I	Very-long-chain enoyl-CoA	-	GO:0000038,GO:0000902,GO:0000904,GO:0003674,GO:0003824,GO:0004312,GO:0005575,GO:0005622,GO:0005623,GO:0005737,GO:0005783,GO:0005789,GO:0005886,GO:0006082,GO:0006629,GO:0006631,GO:0006633,GO:0006643,GO:0006665,GO:0006807,GO:0007275,GO:0008150,GO:0008152,GO:0008610,GO:0009058,GO:0009653,GO:0009888,GO:0009922,GO:0009923,GO:0009987,GO:0010025,GO:0010026,GO:0010090,GO:0010091,GO:0010166,GO:0010927,GO:…	1.3.1.93	ko:K10258	ko00062,ko01040,ko01110,ko01212,map00062,map01040,map01110,map01212	M00415	R07761,R09449,R10828	RC00052,RC00120	ko00000,ko00001,ko00002,ko01000,ko01004	-	-	-	Steroid_dh
lcl|ORF7_TRINITY_DN16587_c0_g1_i2_185_1117	29760.VIT_13s0019g01260.t01	5.75e-214	592.0	KOG1639@1|root,KOG1639@2759|Eukaryota,37NGS@33090|Viridiplantae,3GGMN@35493|Streptophyta	35493|Streptophyta	I	Very-long-chain enoyl-CoA	-	GO:0000038,GO:0000902,GO:0000904,GO:0003674,GO:0003824,GO:0004312,GO:0005575,GO:0005622,GO:0005623,GO:0005737,GO:0005783,GO:0005789,GO:0005886,GO:0006082,GO:0006629,GO:0006631,GO:0006633,GO:0006643,GO:0006665,GO:0006807,GO:0007275,GO:0008150,GO:0008152,GO:0008610,GO:0009058,GO:0009653,GO:0009888,GO:0009922,GO:0009923,GO:0009987,GO:0010025,GO:0010026,GO:0010090,GO:0010091,GO:0010166,GO:0010927,GO:…	1.3.1.93	ko:K10258	ko00062,ko01040,ko01110,ko01212,map00062,map01040,map01110,map01212	M00415	R07761,R09449,R10828	RC00052,RC00120	ko00000,ko00001,ko00002,ko01000,ko01004	-	-	-	Steroid_dh
lcl|ORF1_TRINITY_DN10597_c1_g1_i2_192_1124	29760.VIT_13s0019g01260.t01	2.34e-213	590.0	KOG1639@1|root,KOG1639@2759|Eukaryota,37NGS@33090|Viridiplantae,3GGMN@35493|Streptophyta	35493|Streptophyta	I	Very-long-chain enoyl-CoA	-	GO:0000038,GO:0000902,GO:0000904,GO:0003674,GO:0003824,GO:0004312,GO:0005575,GO:0005622,GO:0005623,GO:0005737,GO:0005783,GO:0005789,GO:0005886,GO:0006082,GO:0006629,GO:0006631,GO:0006633,GO:0006643,GO:0006665,GO:0006807,GO:0007275,GO:0008150,GO:0008152,GO:0008610,GO:0009058,GO:0009653,GO:0009888,GO:0009922,GO:0009923,GO:0009987,GO:0010025,GO:0010026,GO:0010090,GO:0010091,GO:0010166,GO:0010927,GO:…	1.3.1.93	ko:K10258	ko00062,ko01040,ko01110,ko01212,map00062,map01040,map01110,map01212	M00415	R07761,R09449,R10828	RC00052,RC00120	ko00000,ko00001,ko00002,ko01000,ko01004	-	-	-	Steroid_dh
lcl|ORF1_TRINITY_DN24730_c0_g1_i2_214_939	4096.XP_009798034.1	2.49e-67	215.0	2C6UX@1|root,2S2YT@2759|Eukaryota,37VAJ@33090|Viridiplantae,3GJW2@35493|Streptophyta,44M11@71274|asterids	35493|Streptophyta	-	-	-	-	-	-	-	-	-	-	-	-	-	-	-
lcl|ORF10_TRINITY_DN12177_c0_g1_i2_1023_298	4096.XP_009798034.1	3.53e-67	215.0	2C6UX@1|root,2S2YT@2759|Eukaryota,37VAJ@33090|Viridiplantae,3GJW2@35493|Streptophyta,44M11@71274|asterids	35493|Streptophyta	-	-	-	-	-	-	-	-	-	-	-	-	-	-	-
lcl|ORF3_TRINITY_DN2493_c0_g1_i2_305_1030	4096.XP_009798034.1	2.49e-67	215.0	2C6UX@1|root,2S2YT@2759|Eukaryota,37VAJ@33090|Viridiplantae,3GJW2@35493|Streptophyta,44M11@71274|asterids	35493|Streptophyta	-	-	-	-	-	-	-	-	-	-	-	-	-	-	-
XP_028119329.1	4096.XP_009798034.1	8.49e-63	204.0	2C6UX@1|root,2S2YT@2759|Eukaryota,37VAJ@33090|Viridiplantae,3GJW2@35493|Streptophyta,44M11@71274|asterids	35493|Streptophyta	-	-	-	-	-	-	-	-	-	-	-	-	-	-	-
lcl|ORF12_TRINITY_DN123974_c0_g1_i1_1118_393	4096.XP_009798034.1	2.49e-67	215.0	2C6UX@1|root,2S2YT@2759|Eukaryota,37VAJ@33090|Viridiplantae,3GJW2@35493|Streptophyta,44M11@71274|asterids	35493|Streptophyta	-	-	-	-	-	-	-	-	-	-	-	-	-	-	-
lcl|ORF8_TRINITY_DN13102_c0_g1_i1_960_235	4096.XP_009798034.1	1.42e-66	213.0	2C6UX@1|root,2S2YT@2759|Eukaryota,37VAJ@33090|Viridiplantae,3GJW2@35493|Streptophyta,44M11@71274|asterids	35493|Streptophyta	-	-	-	-	-	-	-	-	-	-	-	-	-	-	-
lcl|ORF11_TRINITY_DN11643_c0_g1_i1_920_195	4096.XP_009798034.1	2.49e-67	215.0	2C6UX@1|root,2S2YT@2759|Eukaryota,37VAJ@33090|Viridiplantae,3GJW2@35493|Streptophyta,44M11@71274|asterids	35493|Streptophyta	-	-	-	-	-	-	-	-	-	-	-	-	-	-	-
lcl|ORF2_TRINITY_DN4701_c0_g1_i1_1195_1338	3847.GLYMA07G16070.1	3.96e-12	64.7	2C6UX@1|root,2S4AF@2759|Eukaryota,37WKZ@33090|Viridiplantae,3GKF1@35493|Streptophyta,4JQGB@91835|fabids	35493|Streptophyta	S	isoform X1	-	GO:0003674,GO:0005488,GO:0005515,GO:0005575,GO:0005622,GO:0005623,GO:0005634,GO:0005654,GO:0005737,GO:0006325,GO:0006342,GO:0006355,GO:0006996,GO:0008104,GO:0008150,GO:0009314,GO:0009416,GO:0009628,GO:0009637,GO:0009639,GO:0009889,GO:0009890,GO:0009891,GO:0009892,GO:0009893,GO:0009987,GO:0010218,GO:0010468,GO:0010556,GO:0010557,GO:0010558,GO:0010604,GO:0010605,GO:0010628,GO:0010629,GO:0016043,GO:…	-	-	-	-	-	-	-	-	-	-	-
lcl|ORF6_TRINITY_DN12383_c0_g1_i6_1910_807	29760.VIT_04s0008g01370.t01	2.65e-198	562.0	COG0652@1|root,KOG0885@2759|Eukaryota,37P5S@33090|Viridiplantae,3GGB1@35493|Streptophyta	35493|Streptophyta	O	Peptidyl-prolyl cis-trans isomerase	-	GO:0000413,GO:0003674,GO:0003755,GO:0003824,GO:0005575,GO:0005622,GO:0005623,GO:0005634,GO:0005681,GO:0005911,GO:0006464,GO:0006807,GO:0008150,GO:0008152,GO:0009506,GO:0009987,GO:0016853,GO:0016859,GO:0018193,GO:0018208,GO:0019538,GO:0030054,GO:0032991,GO:0036211,GO:0043170,GO:0043226,GO:0043227,GO:0043229,GO:0043231,GO:0043412,GO:0044237,GO:0044238,GO:0044260,GO:0044267,GO:0044422,GO:0044424,GO:…	5.2.1.8	ko:K12737	-	-	-	-	ko00000,ko01000,ko03041,ko03110	-	-	-	Pro_isomerase
lcl|ORF1_TRINITY_DN16920_c0_g1_i1_142_1632	29760.VIT_04s0008g01370.t01	1.84e-265	738.0	COG0652@1|root,KOG0885@2759|Eukaryota,37P5S@33090|Viridiplantae,3GGB1@35493|Streptophyta	35493|Streptophyta	O	Peptidyl-prolyl cis-trans isomerase	-	GO:0000413,GO:0003674,GO:0003755,GO:0003824,GO:0005575,GO:0005622,GO:0005623,GO:0005634,GO:0005681,GO:0005911,GO:0006464,GO:0006807,GO:0008150,GO:0008152,GO:0009506,GO:0009987,GO:0016853,GO:0016859,GO:0018193,GO:0018208,GO:0019538,GO:0030054,GO:0032991,GO:0036211,GO:0043170,GO:0043226,GO:0043227,GO:0043229,GO:0043231,GO:0043412,GO:0044237,GO:0044238,GO:0044260,GO:0044267,GO:0044422,GO:0044424,GO:…	5.2.1.8	ko:K12737	-	-	-	-	ko00000,ko01000,ko03041,ko03110	-	-	-	Pro_isomerase
lcl|ORF5_TRINITY_DN21667_c0_g1_i2_182_1672	29760.VIT_04s0008g01370.t01	1.51e-264	735.0	COG0652@1|root,KOG0885@2759|Eukaryota,37P5S@33090|Viridiplantae,3GGB1@35493|Streptophyta	35493|Streptophyta	O	Peptidyl-prolyl cis-trans isomerase	-	GO:0000413,GO:0003674,GO:0003755,GO:0003824,GO:0005575,GO:0005622,GO:0005623,GO:0005634,GO:0005681,GO:0005911,GO:0006464,GO:0006807,GO:0008150,GO:0008152,GO:0009506,GO:0009987,GO:0016853,GO:0016859,GO:0018193,GO:0018208,GO:0019538,GO:0030054,GO:0032991,GO:0036211,GO:0043170,GO:0043226,GO:0043227,GO:0043229,GO:0043231,GO:0043412,GO:0044237,GO:0044238,GO:0044260,GO:0044267,GO:0044422,GO:0044424,GO:…	5.2.1.8	ko:K12737	-	-	-	-	ko00000,ko01000,ko03041,ko03110	-	-	-	Pro_isomerase
XP_028062006.1	29760.VIT_04s0008g01370.t01	5.26e-265	736.0	COG0652@1|root,KOG0885@2759|Eukaryota,37P5S@33090|Viridiplantae,3GGB1@35493|Streptophyta	35493|Streptophyta	O	Peptidyl-prolyl cis-trans isomerase	-	GO:0000413,GO:0003674,GO:0003755,GO:0003824,GO:0005575,GO:0005622,GO:0005623,GO:0005634,GO:0005681,GO:0005911,GO:0006464,GO:0006807,GO:0008150,GO:0008152,GO:0009506,GO:0009987,GO:0016853,GO:0016859,GO:0018193,GO:0018208,GO:0019538,GO:0030054,GO:0032991,GO:0036211,GO:0043170,GO:0043226,GO:0043227,GO:0043229,GO:0043231,GO:0043412,GO:0044237,GO:0044238,GO:0044260,GO:0044267,GO:0044422,GO:0044424,GO:…	5.2.1.8	ko:K12737	-	-	-	-	ko00000,ko01000,ko03041,ko03110	-	-	-	Pro_isomerase
lcl|ORF1_TRINITY_DN8864_c0_g1_i1_192_1682	29760.VIT_04s0008g01370.t01	2.61e-265	737.0	COG0652@1|root,KOG0885@2759|Eukaryota,37P5S@33090|Viridiplantae,3GGB1@35493|Streptophyta	35493|Streptophyta	O	Peptidyl-prolyl cis-trans isomerase	-	GO:0000413,GO:0003674,GO:0003755,GO:0003824,GO:0005575,GO:0005622,GO:0005623,GO:0005634,GO:0005681,GO:0005911,GO:0006464,GO:0006807,GO:0008150,GO:0008152,GO:0009506,GO:0009987,GO:0016853,GO:0016859,GO:0018193,GO:0018208,GO:0019538,GO:0030054,GO:0032991,GO:0036211,GO:0043170,GO:0043226,GO:0043227,GO:0043229,GO:0043231,GO:0043412,GO:0044237,GO:0044238,GO:0044260,GO:0044267,GO:0044422,GO:0044424,GO:…	5.2.1.8	ko:K12737	-	-	-	-	ko00000,ko01000,ko03041,ko03110	-	-	-	Pro_isomerase
lcl|ORF1_TRINITY_DN6197_c0_g2_i1_250_1740	29760.VIT_04s0008g01370.t01	1.84e-265	738.0	COG0652@1|root,KOG0885@2759|Eukaryota,37P5S@33090|Viridiplantae,3GGB1@35493|Streptophyta	35493|Streptophyta	O	Peptidyl-prolyl cis-trans isomerase	-	GO:0000413,GO:0003674,GO:0003755,GO:0003824,GO:0005575,GO:0005622,GO:0005623,GO:0005634,GO:0005681,GO:0005911,GO:0006464,GO:0006807,GO:0008150,GO:0008152,GO:0009506,GO:0009987,GO:0016853,GO:0016859,GO:0018193,GO:0018208,GO:0019538,GO:0030054,GO:0032991,GO:0036211,GO:0043170,GO:0043226,GO:0043227,GO:0043229,GO:0043231,GO:0043412,GO:0044237,GO:0044238,GO:0044260,GO:0044267,GO:0044422,GO:0044424,GO:…	5.2.1.8	ko:K12737	-	-	-	-	ko00000,ko01000,ko03041,ko03110	-	-	-	Pro_isomerase
lcl|ORF8_TRINITY_DN17714_c0_g1_i1_1903_413	29760.VIT_04s0008g01370.t01	1.23e-263	733.0	COG0652@1|root,KOG0885@2759|Eukaryota,37P5S@33090|Viridiplantae,3GGB1@35493|Streptophyta	35493|Streptophyta	O	Peptidyl-prolyl cis-trans isomerase	-	GO:0000413,GO:0003674,GO:0003755,GO:0003824,GO:0005575,GO:0005622,GO:0005623,GO:0005634,GO:0005681,GO:0005911,GO:0006464,GO:0006807,GO:0008150,GO:0008152,GO:0009506,GO:0009987,GO:0016853,GO:0016859,GO:0018193,GO:0018208,GO:0019538,GO:0030054,GO:0032991,GO:0036211,GO:0043170,GO:0043226,GO:0043227,GO:0043229,GO:0043231,GO:0043412,GO:0044237,GO:0044238,GO:0044260,GO:0044267,GO:0044422,GO:0044424,GO:…	5.2.1.8	ko:K12737	-	-	-	-	ko00000,ko01000,ko03041,ko03110	-	-	-	Pro_isomerase
lcl|ORF6_TRINITY_DN9082_c0_g1_i1_1882_392	29760.VIT_04s0008g01370.t01	5.26e-265	736.0	COG0652@1|root,KOG0885@2759|Eukaryota,37P5S@33090|Viridiplantae,3GGB1@35493|Streptophyta	35493|Streptophyta	O	Peptidyl-prolyl cis-trans isomerase	-	GO:0000413,GO:0003674,GO:0003755,GO:0003824,GO:0005575,GO:0005622,GO:0005623,GO:0005634,GO:0005681,GO:0005911,GO:0006464,GO:0006807,GO:0008150,GO:0008152,GO:0009506,GO:0009987,GO:0016853,GO:0016859,GO:0018193,GO:0018208,GO:0019538,GO:0030054,GO:0032991,GO:0036211,GO:0043170,GO:0043226,GO:0043227,GO:0043229,GO:0043231,GO:0043412,GO:0044237,GO:0044238,GO:0044260,GO:0044267,GO:0044422,GO:0044424,GO:…	5.2.1.8	ko:K12737	-	-	-	-	ko00000,ko01000,ko03041,ko03110	-	-	-	Pro_isomerase
lcl|ORF2_TRINITY_DN7866_c0_g1_i2_233_1012	3649.evm.model.supercontig_8.295	7.02e-154	439.0	28K9J@1|root,2R062@2759|Eukaryota,37NB3@33090|Viridiplantae,3G7DH@35493|Streptophyta,3HTEZ@3699|Brassicales	35493|Streptophyta	K	Belongs to the GRAS family	-	GO:0001708,GO:0003674,GO:0003676,GO:0003677,GO:0003700,GO:0005488,GO:0005575,GO:0005622,GO:0005623,GO:0005634,GO:0006355,GO:0007275,GO:0008150,GO:0009889,GO:0009987,GO:0010468,GO:0010556,GO:0019219,GO:0019222,GO:0030154,GO:0031323,GO:0031326,GO:0032501,GO:0032502,GO:0043226,GO:0043227,GO:0043229,GO:0043231,GO:0043565,GO:0044424,GO:0044464,GO:0045165,GO:0048366,GO:0048367,GO:0048731,GO:0048827,GO:…	-	-	-	-	-	-	-	-	-	-	GRAS
lcl|ORF6_TRINITY_DN18378_c0_g1_i2_1601_192	29760.VIT_03s0017g01660.t01	1.72e-247	689.0	28K9J@1|root,2R062@2759|Eukaryota,37NB3@33090|Viridiplantae,3G7DH@35493|Streptophyta	35493|Streptophyta	K	Belongs to the GRAS family	-	GO:0001708,GO:0003674,GO:0003676,GO:0003677,GO:0003700,GO:0005488,GO:0005575,GO:0005622,GO:0005623,GO:0005634,GO:0006355,GO:0007275,GO:0008150,GO:0009889,GO:0009987,GO:0010468,GO:0010556,GO:0019219,GO:0019222,GO:0030154,GO:0031323,GO:0031326,GO:0032501,GO:0032502,GO:0043226,GO:0043227,GO:0043229,GO:0043231,GO:0043565,GO:0044424,GO:0044464,GO:0045165,GO:0048366,GO:0048367,GO:0048731,GO:0048827,GO:…	-	-	-	-	-	-	-	-	-	-	GRAS
lcl|ORF6_TRINITY_DN1488_c3_g2_i1_1821_412	29760.VIT_03s0017g01660.t01	3.48e-247	688.0	28K9J@1|root,2R062@2759|Eukaryota,37NB3@33090|Viridiplantae,3G7DH@35493|Streptophyta	35493|Streptophyta	K	Belongs to the GRAS family	-	GO:0001708,GO:0003674,GO:0003676,GO:0003677,GO:0003700,GO:0005488,GO:0005575,GO:0005622,GO:0005623,GO:0005634,GO:0006355,GO:0007275,GO:0008150,GO:0009889,GO:0009987,GO:0010468,GO:0010556,GO:0019219,GO:0019222,GO:0030154,GO:0031323,GO:0031326,GO:0032501,GO:0032502,GO:0043226,GO:0043227,GO:0043229,GO:0043231,GO:0043565,GO:0044424,GO:0044464,GO:0045165,GO:0048366,GO:0048367,GO:0048731,GO:0048827,GO:…	-	-	-	-	-	-	-	-	-	-	GRAS
XP_028096173.1	29760.VIT_03s0017g01660.t01	1.32e-248	691.0	28K9J@1|root,2R062@2759|Eukaryota,37NB3@33090|Viridiplantae,3G7DH@35493|Streptophyta	35493|Streptophyta	K	Belongs to the GRAS family	-	GO:0001708,GO:0003674,GO:0003676,GO:0003677,GO:0003700,GO:0005488,GO:0005575,GO:0005622,GO:0005623,GO:0005634,GO:0006355,GO:0007275,GO:0008150,GO:0009889,GO:0009987,GO:0010468,GO:0010556,GO:0019219,GO:0019222,GO:0030154,GO:0031323,GO:0031326,GO:0032501,GO:0032502,GO:0043226,GO:0043227,GO:0043229,GO:0043231,GO:0043565,GO:0044424,GO:0044464,GO:0045165,GO:0048366,GO:0048367,GO:0048731,GO:0048827,GO:…	-	-	-	-	-	-	-	-	-	-	GRAS
lcl|ORF3_TRINITY_DN17678_c0_g1_i1_181_1590	29760.VIT_03s0017g01660.t01	7.36e-249	692.0	28K9J@1|root,2R062@2759|Eukaryota,37NB3@33090|Viridiplantae,3G7DH@35493|Streptophyta	35493|Streptophyta	K	Belongs to the GRAS family	-	GO:0001708,GO:0003674,GO:0003676,GO:0003677,GO:0003700,GO:0005488,GO:0005575,GO:0005622,GO:0005623,GO:0005634,GO:0006355,GO:0007275,GO:0008150,GO:0009889,GO:0009987,GO:0010468,GO:0010556,GO:0019219,GO:0019222,GO:0030154,GO:0031323,GO:0031326,GO:0032501,GO:0032502,GO:0043226,GO:0043227,GO:0043229,GO:0043231,GO:0043565,GO:0044424,GO:0044464,GO:0045165,GO:0048366,GO:0048367,GO:0048731,GO:0048827,GO:…	-	-	-	-	-	-	-	-	-	-	GRAS
lcl|ORF2_TRINITY_DN5953_c0_g1_i1_154_1563	29760.VIT_03s0017g01660.t01	1.48e-248	691.0	28K9J@1|root,2R062@2759|Eukaryota,37NB3@33090|Viridiplantae,3G7DH@35493|Streptophyta	35493|Streptophyta	K	Belongs to the GRAS family	-	GO:0001708,GO:0003674,GO:0003676,GO:0003677,GO:0003700,GO:0005488,GO:0005575,GO:0005622,GO:0005623,GO:0005634,GO:0006355,GO:0007275,GO:0008150,GO:0009889,GO:0009987,GO:0010468,GO:0010556,GO:0019219,GO:0019222,GO:0030154,GO:0031323,GO:0031326,GO:0032501,GO:0032502,GO:0043226,GO:0043227,GO:0043229,GO:0043231,GO:0043565,GO:0044424,GO:0044464,GO:0045165,GO:0048366,GO:0048367,GO:0048731,GO:0048827,GO:…	-	-	-	-	-	-	-	-	-	-	GRAS
lcl|ORF10_TRINITY_DN1999_c3_g1_i3_1841_432	29760.VIT_03s0017g01660.t01	1.48e-248	691.0	28K9J@1|root,2R062@2759|Eukaryota,37NB3@33090|Viridiplantae,3G7DH@35493|Streptophyta	35493|Streptophyta	K	Belongs to the GRAS family	-	GO:0001708,GO:0003674,GO:0003676,GO:0003677,GO:0003700,GO:0005488,GO:0005575,GO:0005622,GO:0005623,GO:0005634,GO:0006355,GO:0007275,GO:0008150,GO:0009889,GO:0009987,GO:0010468,GO:0010556,GO:0019219,GO:0019222,GO:0030154,GO:0031323,GO:0031326,GO:0032501,GO:0032502,GO:0043226,GO:0043227,GO:0043229,GO:0043231,GO:0043565,GO:0044424,GO:0044464,GO:0045165,GO:0048366,GO:0048367,GO:0048731,GO:0048827,GO:…	-	-	-	-	-	-	-	-	-	-	GRAS
lcl|ORF2_TRINITY_DN15839_c0_g1_i1_98_1507	29760.VIT_03s0017g01660.t01	1.48e-248	691.0	28K9J@1|root,2R062@2759|Eukaryota,37NB3@33090|Viridiplantae,3G7DH@35493|Streptophyta	35493|Streptophyta	K	Belongs to the GRAS family	-	GO:0001708,GO:0003674,GO:0003676,GO:0003677,GO:0003700,GO:0005488,GO:0005575,GO:0005622,GO:0005623,GO:0005634,GO:0006355,GO:0007275,GO:0008150,GO:0009889,GO:0009987,GO:0010468,GO:0010556,GO:0019219,GO:0019222,GO:0030154,GO:0031323,GO:0031326,GO:0032501,GO:0032502,GO:0043226,GO:0043227,GO:0043229,GO:0043231,GO:0043565,GO:0044424,GO:0044464,GO:0045165,GO:0048366,GO:0048367,GO:0048731,GO:0048827,GO:…	-	-	-	-	-	-	-	-	-	-	GRAS
lcl|ORF11_TRINITY_DN7840_c0_g1_i16_2044_935	3983.cassava4.1_009128m	7.81e-207	580.0	COG1179@1|root,KOG2018@2759|Eukaryota,37KU5@33090|Viridiplantae,3GFC6@35493|Streptophyta,4JMUA@91835|fabids	35493|Streptophyta	O	ThiF family	-	-	-	ko:K22132	-	-	-	-	ko00000,ko03016	-	-	-	ThiF
lcl|ORF9_TRINITY_DN8432_c0_g1_i3_1430_387	4098.XP_009609573.1	1.71e-219	613.0	COG1179@1|root,KOG2018@2759|Eukaryota,37KU5@33090|Viridiplantae,3GFC6@35493|Streptophyta,44ISB@71274|asterids	35493|Streptophyta	O	ThiF family	-	-	-	ko:K22132	-	-	-	-	ko00000,ko03016	-	-	-	ThiF
lcl|ORF2_TRINITY_DN24599_c0_g1_i19_1731_2315	4096.XP_009778748.1	2.66e-93	286.0	COG1179@1|root,KOG2018@2759|Eukaryota,37KU5@33090|Viridiplantae,3GFC6@35493|Streptophyta,44ISB@71274|asterids	35493|Streptophyta	O	ThiF family	-	-	-	ko:K22132	-	-	-	-	ko00000,ko03016	-	-	-	ThiF
XP_028053216.1	3827.XP_004490831.1	3.18e-238	666.0	COG1179@1|root,KOG2018@2759|Eukaryota,37KU5@33090|Viridiplantae,3GFC6@35493|Streptophyta,4JMUA@91835|fabids	35493|Streptophyta	O	ThiF family	-	-	-	ko:K22132	-	-	-	-	ko00000,ko03016	-	-	-	ThiF
lcl|ORF10_TRINITY_DN7456_c0_g1_i6_1890_847	4098.XP_009609573.1	3.45e-219	612.0	COG1179@1|root,KOG2018@2759|Eukaryota,37KU5@33090|Viridiplantae,3GFC6@35493|Streptophyta,44ISB@71274|asterids	35493|Streptophyta	O	ThiF family	-	-	-	ko:K22132	-	-	-	-	ko00000,ko03016	-	-	-	ThiF
lcl|ORF5_TRINITY_DN6578_c0_g1_i7_134_1258	3983.cassava4.1_009128m	3.86e-206	578.0	COG1179@1|root,KOG2018@2759|Eukaryota,37KU5@33090|Viridiplantae,3GFC6@35493|Streptophyta,4JMUA@91835|fabids	35493|Streptophyta	O	ThiF family	-	-	-	ko:K22132	-	-	-	-	ko00000,ko03016	-	-	-	ThiF
lcl|ORF9_TRINITY_DN10745_c0_g1_i12_2104_944	3694.POPTR_0004s08160.1	6.91e-205	578.0	COG1179@1|root,KOG2018@2759|Eukaryota,37KU5@33090|Viridiplantae,3GFC6@35493|Streptophyta,4JMUA@91835|fabids	35493|Streptophyta	O	ThiF family	-	-	-	ko:K22132	-	-	-	-	ko00000,ko03016	-	-	-	ThiF
lcl|ORF11_TRINITY_DN12888_c0_g1_i2_2001_607	3694.POPTR_0004s08160.1	9.56e-263	728.0	COG1179@1|root,KOG2018@2759|Eukaryota,37KU5@33090|Viridiplantae,3GFC6@35493|Streptophyta,4JMUA@91835|fabids	35493|Streptophyta	O	ThiF family	-	-	-	ko:K22132	-	-	-	-	ko00000,ko03016	-	-	-	ThiF
lcl|ORF24_TRINITY_DN36457_c0_g1_i9_3117_1	29760.VIT_06s0004g00090.t01	8.09e-243	739.0	2CMXB@1|root,2QSI5@2759|Eukaryota,37ICG@33090|Viridiplantae,3GAQV@35493|Streptophyta	35493|Streptophyta	S	Nuclear pore complex protein	-	GO:0000003,GO:0003006,GO:0003674,GO:0005048,GO:0005198,GO:0005488,GO:0005575,GO:0005622,GO:0005623,GO:0005634,GO:0005635,GO:0005643,GO:0005737,GO:0005739,GO:0006403,GO:0006405,GO:0006606,GO:0006810,GO:0006886,GO:0006913,GO:0007275,GO:0008104,GO:0008139,GO:0008150,GO:0008356,GO:0009790,GO:0009791,GO:0009793,GO:0009987,GO:0010070,GO:0010154,GO:0012505,GO:0015031,GO:0015833,GO:0015931,GO:0017038,GO:…	-	ko:K14317	ko03013,ko05169,map03013,map05169	M00427	-	-	ko00000,ko00001,ko00002,ko03019	1.I.1	-	-	-
lcl|ORF10_TRINITY_DN16962_c0_g1_i2_3125_156	29760.VIT_06s0004g00090.t01	9.07e-234	714.0	2CMXB@1|root,2QSI5@2759|Eukaryota,37ICG@33090|Viridiplantae,3GAQV@35493|Streptophyta	35493|Streptophyta	S	Nuclear pore complex protein	-	GO:0000003,GO:0003006,GO:0003674,GO:0005048,GO:0005198,GO:0005488,GO:0005575,GO:0005622,GO:0005623,GO:0005634,GO:0005635,GO:0005643,GO:0005737,GO:0005739,GO:0006403,GO:0006405,GO:0006606,GO:0006810,GO:0006886,GO:0006913,GO:0007275,GO:0008104,GO:0008139,GO:0008150,GO:0008356,GO:0009790,GO:0009791,GO:0009793,GO:0009987,GO:0010070,GO:0010154,GO:0012505,GO:0015031,GO:0015833,GO:0015931,GO:0017038,GO:…	-	ko:K14317	ko03013,ko05169,map03013,map05169	M00427	-	-	ko00000,ko00001,ko00002,ko03019	1.I.1	-	-	-
lcl|ORF8_TRINITY_DN2060_c0_g1_i6_431_3646	29760.VIT_06s0004g00090.t01	2.27e-233	716.0	2CMXB@1|root,2QSI5@2759|Eukaryota,37ICG@33090|Viridiplantae,3GAQV@35493|Streptophyta	35493|Streptophyta	S	Nuclear pore complex protein	-	GO:0000003,GO:0003006,GO:0003674,GO:0005048,GO:0005198,GO:0005488,GO:0005575,GO:0005622,GO:0005623,GO:0005634,GO:0005635,GO:0005643,GO:0005737,GO:0005739,GO:0006403,GO:0006405,GO:0006606,GO:0006810,GO:0006886,GO:0006913,GO:0007275,GO:0008104,GO:0008139,GO:0008150,GO:0008356,GO:0009790,GO:0009791,GO:0009793,GO:0009987,GO:0010070,GO:0010154,GO:0012505,GO:0015031,GO:0015833,GO:0015931,GO:0017038,GO:…	-	ko:K14317	ko03013,ko05169,map03013,map05169	M00427	-	-	ko00000,ko00001,ko00002,ko03019	1.I.1	-	-	-
XP_028096564.1	102107.XP_008220268.1	0.0	1144.0	2CMXB@1|root,2QSI5@2759|Eukaryota,37ICG@33090|Viridiplantae,3GAQV@35493|Streptophyta,4JISX@91835|fabids	35493|Streptophyta	S	Nuclear pore complex protein	-	-	-	ko:K14317	ko03013,ko05169,map03013,map05169	M00427	-	-	ko00000,ko00001,ko00002,ko03019	1.I.1	-	-	-
lcl|ORF24_TRINITY_DN1617_c0_g1_i1_5461_293	102107.XP_008220268.1	0.0	1191.0	2CMXB@1|root,2QSI5@2759|Eukaryota,37ICG@33090|Viridiplantae,3GAQV@35493|Streptophyta,4JISX@91835|fabids	35493|Streptophyta	S	Nuclear pore complex protein	-	-	-	ko:K14317	ko03013,ko05169,map03013,map05169	M00427	-	-	ko00000,ko00001,ko00002,ko03019	1.I.1	-	-	-
lcl|ORF12_TRINITY_DN1768_c0_g1_i2_170_5365	102107.XP_008220268.1	0.0	1184.0	2CMXB@1|root,2QSI5@2759|Eukaryota,37ICG@33090|Viridiplantae,3GAQV@35493|Streptophyta,4JISX@91835|fabids	35493|Streptophyta	S	Nuclear pore complex protein	-	-	-	ko:K14317	ko03013,ko05169,map03013,map05169	M00427	-	-	ko00000,ko00001,ko00002,ko03019	1.I.1	-	-	-
lcl|ORF1_TRINITY_DN4776_c0_g1_i4_138_5315	102107.XP_008220268.1	0.0	1194.0	2CMXB@1|root,2QSI5@2759|Eukaryota,37ICG@33090|Viridiplantae,3GAQV@35493|Streptophyta,4JISX@91835|fabids	35493|Streptophyta	S	Nuclear pore complex protein	-	-	-	ko:K14317	ko03013,ko05169,map03013,map05169	M00427	-	-	ko00000,ko00001,ko00002,ko03019	1.I.1	-	-	-
lcl|ORF2_TRINITY_DN1914_c0_g1_i35_157_5322	102107.XP_008220268.1	0.0	1191.0	2CMXB@1|root,2QSI5@2759|Eukaryota,37ICG@33090|Viridiplantae,3GAQV@35493|Streptophyta,4JISX@91835|fabids	35493|Streptophyta	S	Nuclear pore complex protein	-	-	-	ko:K14317	ko03013,ko05169,map03013,map05169	M00427	-	-	ko00000,ko00001,ko00002,ko03019	1.I.1	-	-	-
lcl|ORF2_TRINITY_DN708_c1_g1_i1_160_1680	4432.XP_010278985.1	2.36e-283	783.0	COG0516@1|root,KOG2550@2759|Eukaryota,37MGN@33090|Viridiplantae,3GBZ4@35493|Streptophyta	35493|Streptophyta	F	Catalyzes the conversion of inosine 5'-phosphate (IMP) to xanthosine 5'-phosphate (XMP), the first committed and rate- limiting step in the de novo synthesis of guanine nucleotides, and therefore plays an important role in the regulation of cell growth	-	GO:0003674,GO:0003824,GO:0003938,GO:0005575,GO:0005622,GO:0005623,GO:0005737,GO:0005829,GO:0006139,GO:0006163,GO:0006164,GO:0006183,GO:0006725,GO:0006753,GO:0006793,GO:0006796,GO:0006807,GO:0008150,GO:0008152,GO:0009058,GO:0009116,GO:0009117,GO:0009119,GO:0009141,GO:0009142,GO:0009144,GO:0009145,GO:0009150,GO:0009152,GO:0009163,GO:0009165,GO:0009199,GO:0009201,GO:0009205,GO:0009206,GO:0009259,GO:…	1.1.1.205	ko:K00088	ko00230,ko00983,ko01100,ko01110,map00230,map00983,map01100,map01110	M00050	R01130,R08240	RC00143,RC02207	ko00000,ko00001,ko00002,ko01000,ko04147	-	-	-	IMPDH
lcl|ORF4_TRINITY_DN2459_c0_g1_i5_89_1609	4432.XP_010278985.1	1.66e-283	784.0	COG0516@1|root,KOG2550@2759|Eukaryota,37MGN@33090|Viridiplantae,3GBZ4@35493|Streptophyta	35493|Streptophyta	F	Catalyzes the conversion of inosine 5'-phosphate (IMP) to xanthosine 5'-phosphate (XMP), the first committed and rate- limiting step in the de novo synthesis of guanine nucleotides, and therefore plays an important role in the regulation of cell growth	-	GO:0003674,GO:0003824,GO:0003938,GO:0005575,GO:0005622,GO:0005623,GO:0005737,GO:0005829,GO:0006139,GO:0006163,GO:0006164,GO:0006183,GO:0006725,GO:0006753,GO:0006793,GO:0006796,GO:0006807,GO:0008150,GO:0008152,GO:0009058,GO:0009116,GO:0009117,GO:0009119,GO:0009141,GO:0009142,GO:0009144,GO:0009145,GO:0009150,GO:0009152,GO:0009163,GO:0009165,GO:0009199,GO:0009201,GO:0009205,GO:0009206,GO:0009259,GO:…	1.1.1.205	ko:K00088	ko00230,ko00983,ko01100,ko01110,map00230,map00983,map01100,map01110	M00050	R01130,R08240	RC00143,RC02207	ko00000,ko00001,ko00002,ko01000,ko04147	-	-	-	IMPDH
lcl|ORF5_TRINITY_DN9915_c0_g2_i1_128_1648	4432.XP_010278985.1	1.66e-283	784.0	COG0516@1|root,KOG2550@2759|Eukaryota,37MGN@33090|Viridiplantae,3GBZ4@35493|Streptophyta	35493|Streptophyta	F	Catalyzes the conversion of inosine 5'-phosphate (IMP) to xanthosine 5'-phosphate (XMP), the first committed and rate- limiting step in the de novo synthesis of guanine nucleotides, and therefore plays an important role in the regulation of cell growth	-	GO:0003674,GO:0003824,GO:0003938,GO:0005575,GO:0005622,GO:0005623,GO:0005737,GO:0005829,GO:0006139,GO:0006163,GO:0006164,GO:0006183,GO:0006725,GO:0006753,GO:0006793,GO:0006796,GO:0006807,GO:0008150,GO:0008152,GO:0009058,GO:0009116,GO:0009117,GO:0009119,GO:0009141,GO:0009142,GO:0009144,GO:0009145,GO:0009150,GO:0009152,GO:0009163,GO:0009165,GO:0009199,GO:0009201,GO:0009205,GO:0009206,GO:0009259,GO:…	1.1.1.205	ko:K00088	ko00230,ko00983,ko01100,ko01110,map00230,map00983,map01100,map01110	M00050	R01130,R08240	RC00143,RC02207	ko00000,ko00001,ko00002,ko01000,ko04147	-	-	-	IMPDH
XP_028075778.1	4432.XP_010278985.1	1.25e-211	597.0	COG0516@1|root,KOG2550@2759|Eukaryota,37MGN@33090|Viridiplantae,3GBZ4@35493|Streptophyta	35493|Streptophyta	F	Catalyzes the conversion of inosine 5'-phosphate (IMP) to xanthosine 5'-phosphate (XMP), the first committed and rate- limiting step in the de novo synthesis of guanine nucleotides, and therefore plays an important role in the regulation of cell growth	-	GO:0003674,GO:0003824,GO:0003938,GO:0005575,GO:0005622,GO:0005623,GO:0005737,GO:0005829,GO:0006139,GO:0006163,GO:0006164,GO:0006183,GO:0006725,GO:0006753,GO:0006793,GO:0006796,GO:0006807,GO:0008150,GO:0008152,GO:0009058,GO:0009116,GO:0009117,GO:0009119,GO:0009141,GO:0009142,GO:0009144,GO:0009145,GO:0009150,GO:0009152,GO:0009163,GO:0009165,GO:0009199,GO:0009201,GO:0009205,GO:0009206,GO:0009259,GO:…	1.1.1.205	ko:K00088	ko00230,ko00983,ko01100,ko01110,map00230,map00983,map01100,map01110	M00050	R01130,R08240	RC00143,RC02207	ko00000,ko00001,ko00002,ko01000,ko04147	-	-	-	IMPDH
lcl|ORF6_TRINITY_DN2508_c0_g1_i4_131_1369	4432.XP_010278985.1	2.92e-210	594.0	COG0516@1|root,KOG2550@2759|Eukaryota,37MGN@33090|Viridiplantae,3GBZ4@35493|Streptophyta	35493|Streptophyta	F	Catalyzes the conversion of inosine 5'-phosphate (IMP) to xanthosine 5'-phosphate (XMP), the first committed and rate- limiting step in the de novo synthesis of guanine nucleotides, and therefore plays an important role in the regulation of cell growth	-	GO:0003674,GO:0003824,GO:0003938,GO:0005575,GO:0005622,GO:0005623,GO:0005737,GO:0005829,GO:0006139,GO:0006163,GO:0006164,GO:0006183,GO:0006725,GO:0006753,GO:0006793,GO:0006796,GO:0006807,GO:0008150,GO:0008152,GO:0009058,GO:0009116,GO:0009117,GO:0009119,GO:0009141,GO:0009142,GO:0009144,GO:0009145,GO:0009150,GO:0009152,GO:0009163,GO:0009165,GO:0009199,GO:0009201,GO:0009205,GO:0009206,GO:0009259,GO:…	1.1.1.205	ko:K00088	ko00230,ko00983,ko01100,ko01110,map00230,map00983,map01100,map01110	M00050	R01130,R08240	RC00143,RC02207	ko00000,ko00001,ko00002,ko01000,ko04147	-	-	-	IMPDH
lcl|ORF8_TRINITY_DN4046_c0_g1_i2_1905_391	4432.XP_010278985.1	1.98e-279	773.0	COG0516@1|root,KOG2550@2759|Eukaryota,37MGN@33090|Viridiplantae,3GBZ4@35493|Streptophyta	35493|Streptophyta	F	Catalyzes the conversion of inosine 5'-phosphate (IMP) to xanthosine 5'-phosphate (XMP), the first committed and rate- limiting step in the de novo synthesis of guanine nucleotides, and therefore plays an important role in the regulation of cell growth	-	GO:0003674,GO:0003824,GO:0003938,GO:0005575,GO:0005622,GO:0005623,GO:0005737,GO:0005829,GO:0006139,GO:0006163,GO:0006164,GO:0006183,GO:0006725,GO:0006753,GO:0006793,GO:0006796,GO:0006807,GO:0008150,GO:0008152,GO:0009058,GO:0009116,GO:0009117,GO:0009119,GO:0009141,GO:0009142,GO:0009144,GO:0009145,GO:0009150,GO:0009152,GO:0009163,GO:0009165,GO:0009199,GO:0009201,GO:0009205,GO:0009206,GO:0009259,GO:…	1.1.1.205	ko:K00088	ko00230,ko00983,ko01100,ko01110,map00230,map00983,map01100,map01110	M00050	R01130,R08240	RC00143,RC02207	ko00000,ko00001,ko00002,ko01000,ko04147	-	-	-	IMPDH
lcl|ORF15_TRINITY_DN14748_c0_g1_i4_2251_731	4432.XP_010278985.1	2.03e-284	786.0	COG0516@1|root,KOG2550@2759|Eukaryota,37MGN@33090|Viridiplantae,3GBZ4@35493|Streptophyta	35493|Streptophyta	F	Catalyzes the conversion of inosine 5'-phosphate (IMP) to xanthosine 5'-phosphate (XMP), the first committed and rate- limiting step in the de novo synthesis of guanine nucleotides, and therefore plays an important role in the regulation of cell growth	-	GO:0003674,GO:0003824,GO:0003938,GO:0005575,GO:0005622,GO:0005623,GO:0005737,GO:0005829,GO:0006139,GO:0006163,GO:0006164,GO:0006183,GO:0006725,GO:0006753,GO:0006793,GO:0006796,GO:0006807,GO:0008150,GO:0008152,GO:0009058,GO:0009116,GO:0009117,GO:0009119,GO:0009141,GO:0009142,GO:0009144,GO:0009145,GO:0009150,GO:0009152,GO:0009163,GO:0009165,GO:0009199,GO:0009201,GO:0009205,GO:0009206,GO:0009259,GO:…	1.1.1.205	ko:K00088	ko00230,ko00983,ko01100,ko01110,map00230,map00983,map01100,map01110	M00050	R01130,R08240	RC00143,RC02207	ko00000,ko00001,ko00002,ko01000,ko04147	-	-	-	IMPDH
lcl|ORF8_TRINITY_DN1265_c0_g1_i1_2016_496	4432.XP_010278985.1	9.59e-283	782.0	COG0516@1|root,KOG2550@2759|Eukaryota,37MGN@33090|Viridiplantae,3GBZ4@35493|Streptophyta	35493|Streptophyta	F	Catalyzes the conversion of inosine 5'-phosphate (IMP) to xanthosine 5'-phosphate (XMP), the first committed and rate- limiting step in the de novo synthesis of guanine nucleotides, and therefore plays an important role in the regulation of cell growth	-	GO:0003674,GO:0003824,GO:0003938,GO:0005575,GO:0005622,GO:0005623,GO:0005737,GO:0005829,GO:0006139,GO:0006163,GO:0006164,GO:0006183,GO:0006725,GO:0006753,GO:0006793,GO:0006796,GO:0006807,GO:0008150,GO:0008152,GO:0009058,GO:0009116,GO:0009117,GO:0009119,GO:0009141,GO:0009142,GO:0009144,GO:0009145,GO:0009150,GO:0009152,GO:0009163,GO:0009165,GO:0009199,GO:0009201,GO:0009205,GO:0009206,GO:0009259,GO:…	1.1.1.205	ko:K00088	ko00230,ko00983,ko01100,ko01110,map00230,map00983,map01100,map01110	M00050	R01130,R08240	RC00143,RC02207	ko00000,ko00001,ko00002,ko01000,ko04147	-	-	-	IMPDH
lcl|ORF28_TRINITY_DN7761_c0_g1_i1_896_387	102107.XP_008234164.1	2.33e-61	194.0	KOG2925@1|root,KOG2925@2759|Eukaryota,37UI5@33090|Viridiplantae,3GIRA@35493|Streptophyta,4JPRF@91835|fabids	35493|Streptophyta	J	RNA-binding protein	-	GO:0005575,GO:0005622,GO:0005623,GO:0005634,GO:0043226,GO:0043227,GO:0043229,GO:0043231,GO:0044424,GO:0044464	-	ko:K15025	-	-	-	-	ko00000	-	-	-	eIF-1a
lcl|ORF8_TRINITY_DN13252_c0_g1_i2_847_338	102107.XP_008234164.1	2.33e-61	194.0	KOG2925@1|root,KOG2925@2759|Eukaryota,37UI5@33090|Viridiplantae,3GIRA@35493|Streptophyta,4JPRF@91835|fabids	35493|Streptophyta	J	RNA-binding protein	-	GO:0005575,GO:0005622,GO:0005623,GO:0005634,GO:0043226,GO:0043227,GO:0043229,GO:0043231,GO:0044424,GO:0044464	-	ko:K15025	-	-	-	-	ko00000	-	-	-	eIF-1a
lcl|ORF27_TRINITY_DN2046_c2_g1_i3_753_244	102107.XP_008234164.1	2.33e-61	194.0	KOG2925@1|root,KOG2925@2759|Eukaryota,37UI5@33090|Viridiplantae,3GIRA@35493|Streptophyta,4JPRF@91835|fabids	35493|Streptophyta	J	RNA-binding protein	-	GO:0005575,GO:0005622,GO:0005623,GO:0005634,GO:0043226,GO:0043227,GO:0043229,GO:0043231,GO:0044424,GO:0044464	-	ko:K15025	-	-	-	-	ko00000	-	-	-	eIF-1a
XP_028059724.1	102107.XP_008234164.1	2.33e-61	194.0	KOG2925@1|root,KOG2925@2759|Eukaryota,37UI5@33090|Viridiplantae,3GIRA@35493|Streptophyta,4JPRF@91835|fabids	35493|Streptophyta	J	RNA-binding protein	-	GO:0005575,GO:0005622,GO:0005623,GO:0005634,GO:0043226,GO:0043227,GO:0043229,GO:0043231,GO:0044424,GO:0044464	-	ko:K15025	-	-	-	-	ko00000	-	-	-	eIF-1a
lcl|ORF7_TRINITY_DN22455_c0_g1_i1_744_235	102107.XP_008234164.1	2.33e-61	194.0	KOG2925@1|root,KOG2925@2759|Eukaryota,37UI5@33090|Viridiplantae,3GIRA@35493|Streptophyta,4JPRF@91835|fabids	35493|Streptophyta	J	RNA-binding protein	-	GO:0005575,GO:0005622,GO:0005623,GO:0005634,GO:0043226,GO:0043227,GO:0043229,GO:0043231,GO:0044424,GO:0044464	-	ko:K15025	-	-	-	-	ko00000	-	-	-	eIF-1a
lcl|ORF9_TRINITY_DN13910_c0_g1_i1_746_237	102107.XP_008234164.1	1.9e-60	192.0	KOG2925@1|root,KOG2925@2759|Eukaryota,37UI5@33090|Viridiplantae,3GIRA@35493|Streptophyta,4JPRF@91835|fabids	35493|Streptophyta	J	RNA-binding protein	-	GO:0005575,GO:0005622,GO:0005623,GO:0005634,GO:0043226,GO:0043227,GO:0043229,GO:0043231,GO:0044424,GO:0044464	-	ko:K15025	-	-	-	-	ko00000	-	-	-	eIF-1a
lcl|ORF4_TRINITY_DN8468_c0_g1_i1_943_1452	102107.XP_008234164.1	2.33e-61	194.0	KOG2925@1|root,KOG2925@2759|Eukaryota,37UI5@33090|Viridiplantae,3GIRA@35493|Streptophyta,4JPRF@91835|fabids	35493|Streptophyta	J	RNA-binding protein	-	GO:0005575,GO:0005622,GO:0005623,GO:0005634,GO:0043226,GO:0043227,GO:0043229,GO:0043231,GO:0044424,GO:0044464	-	ko:K15025	-	-	-	-	ko00000	-	-	-	eIF-1a
lcl|ORF7_TRINITY_DN47983_c0_g1_i1_683_174	102107.XP_008234164.1	1.9e-60	192.0	KOG2925@1|root,KOG2925@2759|Eukaryota,37UI5@33090|Viridiplantae,3GIRA@35493|Streptophyta,4JPRF@91835|fabids	35493|Streptophyta	J	RNA-binding protein	-	GO:0005575,GO:0005622,GO:0005623,GO:0005634,GO:0043226,GO:0043227,GO:0043229,GO:0043231,GO:0044424,GO:0044464	-	ko:K15025	-	-	-	-	ko00000	-	-	-	eIF-1a
lcl|ORF3_TRINITY_DN7744_c0_g1_i16_50_1108	2711.XP_006466027.1	9.7e-206	574.0	COG1235@1|root,2QWBK@2759|Eukaryota,37NNQ@33090|Viridiplantae,3GBUH@35493|Streptophyta	35493|Streptophyta	S	hydrolase C777.06c	-	-	-	-	-	-	-	-	-	-	-	-	Lactamase_B,Lactamase_B_2
lcl|ORF6_TRINITY_DN5222_c0_g1_i1_1308_250	2711.XP_006466027.1	5.87e-207	577.0	COG1235@1|root,2QWBK@2759|Eukaryota,37NNQ@33090|Viridiplantae,3GBUH@35493|Streptophyta	35493|Streptophyta	S	hydrolase C777.06c	-	-	-	-	-	-	-	-	-	-	-	-	Lactamase_B,Lactamase_B_2
lcl|ORF1_TRINITY_DN6803_c0_g1_i5_147_1205	2711.XP_006466027.1	1.96e-205	573.0	COG1235@1|root,2QWBK@2759|Eukaryota,37NNQ@33090|Viridiplantae,3GBUH@35493|Streptophyta	35493|Streptophyta	S	hydrolase C777.06c	-	-	-	-	-	-	-	-	-	-	-	-	Lactamase_B,Lactamase_B_2
XP_028057497.1	2711.XP_006466027.1	2.78e-205	573.0	COG1235@1|root,2QWBK@2759|Eukaryota,37NNQ@33090|Viridiplantae,3GBUH@35493|Streptophyta	35493|Streptophyta	S	hydrolase C777.06c	-	-	-	-	-	-	-	-	-	-	-	-	Lactamase_B,Lactamase_B_2
lcl|ORF6_TRINITY_DN35998_c0_g1_i2_1319_261	2711.XP_006466027.1	1.38e-205	574.0	COG1235@1|root,2QWBK@2759|Eukaryota,37NNQ@33090|Viridiplantae,3GBUH@35493|Streptophyta	35493|Streptophyta	S	hydrolase C777.06c	-	-	-	-	-	-	-	-	-	-	-	-	Lactamase_B,Lactamase_B_2
lcl|ORF3_TRINITY_DN27628_c0_g1_i1_38_1096	2711.XP_006466027.1	1.38e-205	574.0	COG1235@1|root,2QWBK@2759|Eukaryota,37NNQ@33090|Viridiplantae,3GBUH@35493|Streptophyta	35493|Streptophyta	S	hydrolase C777.06c	-	-	-	-	-	-	-	-	-	-	-	-	Lactamase_B,Lactamase_B_2
lcl|ORF6_TRINITY_DN33555_c1_g1_i2_1344_286	2711.XP_006466027.1	1.68e-206	576.0	COG1235@1|root,2QWBK@2759|Eukaryota,37NNQ@33090|Viridiplantae,3GBUH@35493|Streptophyta	35493|Streptophyta	S	hydrolase C777.06c	-	-	-	-	-	-	-	-	-	-	-	-	Lactamase_B,Lactamase_B_2
lcl|ORF7_TRINITY_DN9629_c0_g1_i6_1385_474	2711.XP_006466027.1	3.76e-167	474.0	COG1235@1|root,2QWBK@2759|Eukaryota,37NNQ@33090|Viridiplantae,3GBUH@35493|Streptophyta	35493|Streptophyta	S	hydrolase C777.06c	-	-	-	-	-	-	-	-	-	-	-	-	Lactamase_B,Lactamase_B_2
lcl|ORF10_TRINITY_DN9061_c0_g1_i3_629_381	4096.XP_009798273.1	5.47e-35	122.0	2BE6N@1|root,2S143@2759|Eukaryota,37VTM@33090|Viridiplantae,3GJNJ@35493|Streptophyta,44K6Y@71274|asterids	35493|Streptophyta	-	-	-	-	-	-	-	-	-	-	-	-	-	-	-
lcl|ORF2_TRINITY_DN857_c0_g1_i1_61_510	4432.XP_010264836.1	3.26e-55	177.0	2BE6N@1|root,2S143@2759|Eukaryota,37VTM@33090|Viridiplantae,3GJNJ@35493|Streptophyta	35493|Streptophyta	-	-	-	-	-	-	-	-	-	-	-	-	-	-	-
lcl|ORF15_TRINITY_DN6193_c0_g1_i8_626_378	4096.XP_009798273.1	5.47e-35	122.0	2BE6N@1|root,2S143@2759|Eukaryota,37VTM@33090|Viridiplantae,3GJNJ@35493|Streptophyta,44K6Y@71274|asterids	35493|Streptophyta	-	-	-	-	-	-	-	-	-	-	-	-	-	-	-
XP_028077439.1	4432.XP_010264836.1	4.63e-55	177.0	2BE6N@1|root,2S143@2759|Eukaryota,37VTM@33090|Viridiplantae,3GJNJ@35493|Streptophyta	35493|Streptophyta	-	-	-	-	-	-	-	-	-	-	-	-	-	-	-
lcl|ORF3_TRINITY_DN16836_c0_g2_i2_68_517	4432.XP_010264836.1	3.26e-55	177.0	2BE6N@1|root,2S143@2759|Eukaryota,37VTM@33090|Viridiplantae,3GJNJ@35493|Streptophyta	35493|Streptophyta	-	-	-	-	-	-	-	-	-	-	-	-	-	-	-
lcl|ORF4_TRINITY_DN15158_c0_g1_i7_1322_1570	4096.XP_009798273.1	5.47e-35	122.0	2BE6N@1|root,2S143@2759|Eukaryota,37VTM@33090|Viridiplantae,3GJNJ@35493|Streptophyta,44K6Y@71274|asterids	35493|Streptophyta	-	-	-	-	-	-	-	-	-	-	-	-	-	-	-
lcl|ORF5_TRINITY_DN2176_c0_g1_i1_832_383	4432.XP_010264836.1	3.26e-55	177.0	2BE6N@1|root,2S143@2759|Eukaryota,37VTM@33090|Viridiplantae,3GJNJ@35493|Streptophyta	35493|Streptophyta	-	-	-	-	-	-	-	-	-	-	-	-	-	-	-
lcl|ORF1_TRINITY_DN4684_c0_g1_i1_564_812	4096.XP_009798273.1	5.47e-35	122.0	2BE6N@1|root,2S143@2759|Eukaryota,37VTM@33090|Viridiplantae,3GJNJ@35493|Streptophyta,44K6Y@71274|asterids	35493|Streptophyta	-	-	-	-	-	-	-	-	-	-	-	-	-	-	-
lcl|ORF2_TRINITY_DN9047_c0_g2_i3_106_969	102107.XP_008242690.1	1.59e-155	442.0	COG1836@1|root,KOG4491@2759|Eukaryota,37RCY@33090|Viridiplantae,3GBIC@35493|Streptophyta,4JG2J@91835|fabids	35493|Streptophyta	S	Transmembrane protein 19-like	-	GO:0005575,GO:0016020	-	-	-	-	-	-	-	-	-	-	DUF92
lcl|ORF11_TRINITY_DN13397_c0_g1_i1_1105_242	29760.VIT_11s0016g04520.t01	5.21e-155	441.0	COG1836@1|root,KOG4491@2759|Eukaryota,37RCY@33090|Viridiplantae,3GBIC@35493|Streptophyta	35493|Streptophyta	S	Transmembrane protein 19	-	GO:0005575,GO:0016020	-	-	-	-	-	-	-	-	-	-	DUF92
lcl|ORF11_TRINITY_DN8201_c0_g1_i2_1485_622	102107.XP_008242690.1	1.59e-155	442.0	COG1836@1|root,KOG4491@2759|Eukaryota,37RCY@33090|Viridiplantae,3GBIC@35493|Streptophyta,4JG2J@91835|fabids	35493|Streptophyta	S	Transmembrane protein 19-like	-	GO:0005575,GO:0016020	-	-	-	-	-	-	-	-	-	-	DUF92
XP_028091797.1	102107.XP_008242690.1	3.05e-153	436.0	COG1836@1|root,KOG4491@2759|Eukaryota,37RCY@33090|Viridiplantae,3GBIC@35493|Streptophyta,4JG2J@91835|fabids	35493|Streptophyta	S	Transmembrane protein 19-like	-	GO:0005575,GO:0016020	-	-	-	-	-	-	-	-	-	-	DUF92
lcl|ORF10_TRINITY_DN54988_c0_g1_i1_1381_518	102107.XP_008242690.1	1.59e-155	442.0	COG1836@1|root,KOG4491@2759|Eukaryota,37RCY@33090|Viridiplantae,3GBIC@35493|Streptophyta,4JG2J@91835|fabids	35493|Streptophyta	S	Transmembrane protein 19-like	-	GO:0005575,GO:0016020	-	-	-	-	-	-	-	-	-	-	DUF92
lcl|ORF1_TRINITY_DN8224_c0_g1_i1_129_992	102107.XP_008242690.1	1.59e-155	442.0	COG1836@1|root,KOG4491@2759|Eukaryota,37RCY@33090|Viridiplantae,3GBIC@35493|Streptophyta,4JG2J@91835|fabids	35493|Streptophyta	S	Transmembrane protein 19-like	-	GO:0005575,GO:0016020	-	-	-	-	-	-	-	-	-	-	DUF92
lcl|ORF10_TRINITY_DN12376_c0_g1_i1_1295_432	102107.XP_008242690.1	1.59e-155	442.0	COG1836@1|root,KOG4491@2759|Eukaryota,37RCY@33090|Viridiplantae,3GBIC@35493|Streptophyta,4JG2J@91835|fabids	35493|Streptophyta	S	Transmembrane protein 19-like	-	GO:0005575,GO:0016020	-	-	-	-	-	-	-	-	-	-	DUF92
lcl|ORF12_TRINITY_DN12582_c0_g1_i2_1299_436	102107.XP_008242690.1	1.59e-155	442.0	COG1836@1|root,KOG4491@2759|Eukaryota,37RCY@33090|Viridiplantae,3GBIC@35493|Streptophyta,4JG2J@91835|fabids	35493|Streptophyta	S	Transmembrane protein 19-like	-	GO:0005575,GO:0016020	-	-	-	-	-	-	-	-	-	-	DUF92
lcl|ORF5_TRINITY_DN4257_c0_g1_i1_1143_259	4432.XP_010269468.1	9.13e-62	204.0	28N3T@1|root,2QUNY@2759|Eukaryota,37I48@33090|Viridiplantae,3GGQZ@35493|Streptophyta	35493|Streptophyta	S	Protein kinase C conserved region 2 (CalB)	-	-	2.7.7.6	ko:K03006	ko00230,ko00240,ko01100,ko03020,ko05016,ko05168,ko05169,map00230,map00240,map01100,map03020,map05016,map05168,map05169	M00180	R00435,R00441,R00442,R00443	RC02795	br01611,ko00000,ko00001,ko00002,ko01000,ko03021,ko03400	-	-	-	C2
lcl|ORF5_TRINITY_DN1009_c0_g1_i1_795_1	4432.XP_010269468.1	3.46e-62	204.0	28N3T@1|root,2QUNY@2759|Eukaryota,37I48@33090|Viridiplantae,3GGQZ@35493|Streptophyta	35493|Streptophyta	S	Protein kinase C conserved region 2 (CalB)	-	-	2.7.7.6	ko:K03006	ko00230,ko00240,ko01100,ko03020,ko05016,ko05168,ko05169,map00230,map00240,map01100,map03020,map05016,map05168,map05169	M00180	R00435,R00441,R00442,R00443	RC02795	br01611,ko00000,ko00001,ko00002,ko01000,ko03021,ko03400	-	-	-	C2
lcl|ORF7_TRINITY_DN4122_c0_g1_i4_1555_2418	4432.XP_010269468.1	2.05e-61	202.0	28N3T@1|root,2QUNY@2759|Eukaryota,37I48@33090|Viridiplantae,3GGQZ@35493|Streptophyta	35493|Streptophyta	S	Protein kinase C conserved region 2 (CalB)	-	-	2.7.7.6	ko:K03006	ko00230,ko00240,ko01100,ko03020,ko05016,ko05168,ko05169,map00230,map00240,map01100,map03020,map05016,map05168,map05169	M00180	R00435,R00441,R00442,R00443	RC02795	br01611,ko00000,ko00001,ko00002,ko01000,ko03021,ko03400	-	-	-	C2
XP_028063016.1	4432.XP_010269468.1	1.88e-62	205.0	28N3T@1|root,2QUNY@2759|Eukaryota,37I48@33090|Viridiplantae,3GGQZ@35493|Streptophyta	35493|Streptophyta	S	Protein kinase C conserved region 2 (CalB)	-	-	2.7.7.6	ko:K03006	ko00230,ko00240,ko01100,ko03020,ko05016,ko05168,ko05169,map00230,map00240,map01100,map03020,map05016,map05168,map05169	M00180	R00435,R00441,R00442,R00443	RC02795	br01611,ko00000,ko00001,ko00002,ko01000,ko03021,ko03400	-	-	-	C2
lcl|ORF7_TRINITY_DN1277_c0_g1_i1_1123_248	4432.XP_010269468.1	2.34e-61	202.0	28N3T@1|root,2QUNY@2759|Eukaryota,37I48@33090|Viridiplantae,3GGQZ@35493|Streptophyta	35493|Streptophyta	S	Protein kinase C conserved region 2 (CalB)	-	-	2.7.7.6	ko:K03006	ko00230,ko00240,ko01100,ko03020,ko05016,ko05168,ko05169,map00230,map00240,map01100,map03020,map05016,map05168,map05169	M00180	R00435,R00441,R00442,R00443	RC02795	br01611,ko00000,ko00001,ko00002,ko01000,ko03021,ko03400	-	-	-	C2
lcl|ORF6_TRINITY_DN18067_c0_g1_i2_1116_238	4432.XP_010269468.1	2.42e-61	202.0	28N3T@1|root,2QUNY@2759|Eukaryota,37I48@33090|Viridiplantae,3GGQZ@35493|Streptophyta	35493|Streptophyta	S	Protein kinase C conserved region 2 (CalB)	-	-	2.7.7.6	ko:K03006	ko00230,ko00240,ko01100,ko03020,ko05016,ko05168,ko05169,map00230,map00240,map01100,map03020,map05016,map05168,map05169	M00180	R00435,R00441,R00442,R00443	RC02795	br01611,ko00000,ko00001,ko00002,ko01000,ko03021,ko03400	-	-	-	C2
lcl|ORF4_TRINITY_DN1206_c0_g1_i3_1142_279	4432.XP_010269468.1	5.79e-61	201.0	28N3T@1|root,2QUNY@2759|Eukaryota,37I48@33090|Viridiplantae,3GGQZ@35493|Streptophyta	35493|Streptophyta	S	Protein kinase C conserved region 2 (CalB)	-	-	2.7.7.6	ko:K03006	ko00230,ko00240,ko01100,ko03020,ko05016,ko05168,ko05169,map00230,map00240,map01100,map03020,map05016,map05168,map05169	M00180	R00435,R00441,R00442,R00443	RC02795	br01611,ko00000,ko00001,ko00002,ko01000,ko03021,ko03400	-	-	-	C2
lcl|ORF7_TRINITY_DN9227_c0_g1_i1_1113_241	4432.XP_010269468.1	2.26e-61	202.0	28N3T@1|root,2QUNY@2759|Eukaryota,37I48@33090|Viridiplantae,3GGQZ@35493|Streptophyta	35493|Streptophyta	S	Protein kinase C conserved region 2 (CalB)	-	-	2.7.7.6	ko:K03006	ko00230,ko00240,ko01100,ko03020,ko05016,ko05168,ko05169,map00230,map00240,map01100,map03020,map05016,map05168,map05169	M00180	R00435,R00441,R00442,R00443	RC02795	br01611,ko00000,ko00001,ko00002,ko01000,ko03021,ko03400	-	-	-	C2
lcl|ORF23_TRINITY_DN4249_c0_g1_i7_5043_382	29760.VIT_14s0036g01460.t01	0.0	2120.0	COG0553@1|root,KOG1015@2759|Eukaryota,37R1J@33090|Viridiplantae,3GAZJ@35493|Streptophyta	35493|Streptophyta	K	Transcriptional regulator	-	GO:0000775,GO:0000785,GO:0000792,GO:0000902,GO:0000904,GO:0001674,GO:0001932,GO:0003674,GO:0003824,GO:0005488,GO:0005515,GO:0005575,GO:0005622,GO:0005623,GO:0005634,GO:0005694,GO:0005700,GO:0005701,GO:0005721,GO:0005722,GO:0006139,GO:0006259,GO:0006323,GO:0006325,GO:0006333,GO:0006334,GO:0006336,GO:0006342,GO:0006355,GO:0006725,GO:0006807,GO:0006915,GO:0006928,GO:0006935,GO:0006996,GO:0007154,GO:…	3.6.4.12	ko:K10779	-	-	-	-	ko00000,ko01000,ko03000,ko03036	-	-	-	Helicase_C,SNF2_N
lcl|ORF17_TRINITY_DN6063_c0_g1_i6_4889_1038	29760.VIT_14s0036g01460.t01	0.0	1813.0	COG0553@1|root,KOG1015@2759|Eukaryota,37R1J@33090|Viridiplantae,3GAZJ@35493|Streptophyta	35493|Streptophyta	K	Transcriptional regulator	-	GO:0000775,GO:0000785,GO:0000792,GO:0000902,GO:0000904,GO:0001674,GO:0001932,GO:0003674,GO:0003824,GO:0005488,GO:0005515,GO:0005575,GO:0005622,GO:0005623,GO:0005634,GO:0005694,GO:0005700,GO:0005701,GO:0005721,GO:0005722,GO:0006139,GO:0006259,GO:0006323,GO:0006325,GO:0006333,GO:0006334,GO:0006336,GO:0006342,GO:0006355,GO:0006725,GO:0006807,GO:0006915,GO:0006928,GO:0006935,GO:0006996,GO:0007154,GO:…	3.6.4.12	ko:K10779	-	-	-	-	ko00000,ko01000,ko03000,ko03036	-	-	-	Helicase_C,SNF2_N
lcl|ORF1_TRINITY_DN5256_c0_g1_i15_462_2144	29760.VIT_14s0036g01460.t01	0.0	974.0	COG0553@1|root,KOG1015@2759|Eukaryota,37R1J@33090|Viridiplantae,3GAZJ@35493|Streptophyta	35493|Streptophyta	K	Transcriptional regulator	-	GO:0000775,GO:0000785,GO:0000792,GO:0000902,GO:0000904,GO:0001674,GO:0001932,GO:0003674,GO:0003824,GO:0005488,GO:0005515,GO:0005575,GO:0005622,GO:0005623,GO:0005634,GO:0005694,GO:0005700,GO:0005701,GO:0005721,GO:0005722,GO:0006139,GO:0006259,GO:0006323,GO:0006325,GO:0006333,GO:0006334,GO:0006336,GO:0006342,GO:0006355,GO:0006725,GO:0006807,GO:0006915,GO:0006928,GO:0006935,GO:0006996,GO:0007154,GO:…	3.6.4.12	ko:K10779	-	-	-	-	ko00000,ko01000,ko03000,ko03036	-	-	-	Helicase_C,SNF2_N
XP_028102087.1	29760.VIT_14s0036g01460.t01	0.0	2147.0	COG0553@1|root,KOG1015@2759|Eukaryota,37R1J@33090|Viridiplantae,3GAZJ@35493|Streptophyta	35493|Streptophyta	K	Transcriptional regulator	-	GO:0000775,GO:0000785,GO:0000792,GO:0000902,GO:0000904,GO:0001674,GO:0001932,GO:0003674,GO:0003824,GO:0005488,GO:0005515,GO:0005575,GO:0005622,GO:0005623,GO:0005634,GO:0005694,GO:0005700,GO:0005701,GO:0005721,GO:0005722,GO:0006139,GO:0006259,GO:0006323,GO:0006325,GO:0006333,GO:0006334,GO:0006336,GO:0006342,GO:0006355,GO:0006725,GO:0006807,GO:0006915,GO:0006928,GO:0006935,GO:0006996,GO:0007154,GO:…	3.6.4.12	ko:K10779	-	-	-	-	ko00000,ko01000,ko03000,ko03036	-	-	-	Helicase_C,SNF2_N
lcl|ORF1_TRINITY_DN10183_c0_g2_i2_288_4745	29760.VIT_14s0036g01460.t01	0.0	2150.0	COG0553@1|root,KOG1015@2759|Eukaryota,37R1J@33090|Viridiplantae,3GAZJ@35493|Streptophyta	35493|Streptophyta	K	Transcriptional regulator	-	GO:0000775,GO:0000785,GO:0000792,GO:0000902,GO:0000904,GO:0001674,GO:0001932,GO:0003674,GO:0003824,GO:0005488,GO:0005515,GO:0005575,GO:0005622,GO:0005623,GO:0005634,GO:0005694,GO:0005700,GO:0005701,GO:0005721,GO:0005722,GO:0006139,GO:0006259,GO:0006323,GO:0006325,GO:0006333,GO:0006334,GO:0006336,GO:0006342,GO:0006355,GO:0006725,GO:0006807,GO:0006915,GO:0006928,GO:0006935,GO:0006996,GO:0007154,GO:…	3.6.4.12	ko:K10779	-	-	-	-	ko00000,ko01000,ko03000,ko03036	-	-	-	Helicase_C,SNF2_N
lcl|ORF10_TRINITY_DN6844_c0_g1_i2_284_3727	29760.VIT_14s0036g01460.t01	0.0	1721.0	COG0553@1|root,KOG1015@2759|Eukaryota,37R1J@33090|Viridiplantae,3GAZJ@35493|Streptophyta	35493|Streptophyta	K	Transcriptional regulator	-	GO:0000775,GO:0000785,GO:0000792,GO:0000902,GO:0000904,GO:0001674,GO:0001932,GO:0003674,GO:0003824,GO:0005488,GO:0005515,GO:0005575,GO:0005622,GO:0005623,GO:0005634,GO:0005694,GO:0005700,GO:0005701,GO:0005721,GO:0005722,GO:0006139,GO:0006259,GO:0006323,GO:0006325,GO:0006333,GO:0006334,GO:0006336,GO:0006342,GO:0006355,GO:0006725,GO:0006807,GO:0006915,GO:0006928,GO:0006935,GO:0006996,GO:0007154,GO:…	3.6.4.12	ko:K10779	-	-	-	-	ko00000,ko01000,ko03000,ko03036	-	-	-	Helicase_C,SNF2_N
lcl|ORF1_TRINITY_DN7298_c1_g1_i4_282_4739	29760.VIT_14s0036g01460.t01	0.0	2153.0	COG0553@1|root,KOG1015@2759|Eukaryota,37R1J@33090|Viridiplantae,3GAZJ@35493|Streptophyta	35493|Streptophyta	K	Transcriptional regulator	-	GO:0000775,GO:0000785,GO:0000792,GO:0000902,GO:0000904,GO:0001674,GO:0001932,GO:0003674,GO:0003824,GO:0005488,GO:0005515,GO:0005575,GO:0005622,GO:0005623,GO:0005634,GO:0005694,GO:0005700,GO:0005701,GO:0005721,GO:0005722,GO:0006139,GO:0006259,GO:0006323,GO:0006325,GO:0006333,GO:0006334,GO:0006336,GO:0006342,GO:0006355,GO:0006725,GO:0006807,GO:0006915,GO:0006928,GO:0006935,GO:0006996,GO:0007154,GO:…	3.6.4.12	ko:K10779	-	-	-	-	ko00000,ko01000,ko03000,ko03036	-	-	-	Helicase_C,SNF2_N
lcl|ORF1_TRINITY_DN6664_c0_g1_i4_219_4292	29760.VIT_14s0036g01460.t01	0.0	1944.0	COG0553@1|root,KOG1015@2759|Eukaryota,37R1J@33090|Viridiplantae,3GAZJ@35493|Streptophyta	35493|Streptophyta	K	Transcriptional regulator	-	GO:0000775,GO:0000785,GO:0000792,GO:0000902,GO:0000904,GO:0001674,GO:0001932,GO:0003674,GO:0003824,GO:0005488,GO:0005515,GO:0005575,GO:0005622,GO:0005623,GO:0005634,GO:0005694,GO:0005700,GO:0005701,GO:0005721,GO:0005722,GO:0006139,GO:0006259,GO:0006323,GO:0006325,GO:0006333,GO:0006334,GO:0006336,GO:0006342,GO:0006355,GO:0006725,GO:0006807,GO:0006915,GO:0006928,GO:0006935,GO:0006996,GO:0007154,GO:…	3.6.4.12	ko:K10779	-	-	-	-	ko00000,ko01000,ko03000,ko03036	-	-	-	Helicase_C,SNF2_N
lcl|ORF8_TRINITY_DN36816_c0_g1_i2_1879_290	102107.XP_008228552.1	3.83e-268	748.0	COG0526@1|root,KOG0190@2759|Eukaryota,37SXS@33090|Viridiplantae,3G9V2@35493|Streptophyta,4JGU7@91835|fabids	35493|Streptophyta	O	Protein disulfide isomerase-like	PDIL1-5	GO:0003674,GO:0003756,GO:0003824,GO:0005575,GO:0005622,GO:0005623,GO:0005737,GO:0005783,GO:0006457,GO:0006950,GO:0008150,GO:0009987,GO:0012505,GO:0016853,GO:0016860,GO:0016864,GO:0033554,GO:0034976,GO:0043226,GO:0043227,GO:0043229,GO:0043231,GO:0044424,GO:0044444,GO:0044464,GO:0050896,GO:0051716,GO:0140096	5.3.4.1	ko:K09580	ko04141,map04141	-	-	-	ko00000,ko00001,ko01000,ko03110,ko04131,ko04147	-	-	-	Thioredoxin,Thioredoxin_6
lcl|ORF1_TRINITY_DN12238_c0_g2_i1_226_1815	29760.VIT_09s0002g04250.t01	3.07e-268	748.0	COG0526@1|root,KOG0190@2759|Eukaryota,37SXS@33090|Viridiplantae,3G9V2@35493|Streptophyta	35493|Streptophyta	O	protein disulfide isomerase-like	PDIL1-5	GO:0003674,GO:0003756,GO:0003824,GO:0005575,GO:0005622,GO:0005623,GO:0005737,GO:0005783,GO:0006457,GO:0006950,GO:0008150,GO:0009987,GO:0012505,GO:0016853,GO:0016860,GO:0016864,GO:0033554,GO:0034976,GO:0043226,GO:0043227,GO:0043229,GO:0043231,GO:0044424,GO:0044444,GO:0044464,GO:0050896,GO:0051716,GO:0140096	5.3.4.1	ko:K09580	ko04141,map04141	-	-	-	ko00000,ko00001,ko01000,ko03110,ko04131,ko04147	-	-	-	Thioredoxin,Thioredoxin_6
lcl|ORF1_TRINITY_DN7238_c1_g1_i6_255_1844	102107.XP_008228552.1	7.71e-268	747.0	COG0526@1|root,KOG0190@2759|Eukaryota,37SXS@33090|Viridiplantae,3G9V2@35493|Streptophyta,4JGU7@91835|fabids	35493|Streptophyta	O	Protein disulfide isomerase-like	PDIL1-5	GO:0003674,GO:0003756,GO:0003824,GO:0005575,GO:0005622,GO:0005623,GO:0005737,GO:0005783,GO:0006457,GO:0006950,GO:0008150,GO:0009987,GO:0012505,GO:0016853,GO:0016860,GO:0016864,GO:0033554,GO:0034976,GO:0043226,GO:0043227,GO:0043229,GO:0043231,GO:0044424,GO:0044444,GO:0044464,GO:0050896,GO:0051716,GO:0140096	5.3.4.1	ko:K09580	ko04141,map04141	-	-	-	ko00000,ko00001,ko01000,ko03110,ko04131,ko04147	-	-	-	Thioredoxin,Thioredoxin_6
XP_028124784.1	29760.VIT_09s0002g04250.t01	3.76e-269	750.0	COG0526@1|root,KOG0190@2759|Eukaryota,37SXS@33090|Viridiplantae,3G9V2@35493|Streptophyta	35493|Streptophyta	O	protein disulfide isomerase-like	PDIL1-5	GO:0003674,GO:0003756,GO:0003824,GO:0005575,GO:0005622,GO:0005623,GO:0005737,GO:0005783,GO:0006457,GO:0006950,GO:0008150,GO:0009987,GO:0012505,GO:0016853,GO:0016860,GO:0016864,GO:0033554,GO:0034976,GO:0043226,GO:0043227,GO:0043229,GO:0043231,GO:0044424,GO:0044444,GO:0044464,GO:0050896,GO:0051716,GO:0140096	5.3.4.1	ko:K09580	ko04141,map04141	-	-	-	ko00000,ko00001,ko01000,ko03110,ko04131,ko04147	-	-	-	Thioredoxin,Thioredoxin_6
lcl|ORF12_TRINITY_DN3311_c1_g1_i2_1916_327	102107.XP_008228552.1	2.7e-268	748.0	COG0526@1|root,KOG0190@2759|Eukaryota,37SXS@33090|Viridiplantae,3G9V2@35493|Streptophyta,4JGU7@91835|fabids	35493|Streptophyta	O	Protein disulfide isomerase-like	PDIL1-5	GO:0003674,GO:0003756,GO:0003824,GO:0005575,GO:0005622,GO:0005623,GO:0005737,GO:0005783,GO:0006457,GO:0006950,GO:0008150,GO:0009987,GO:0012505,GO:0016853,GO:0016860,GO:0016864,GO:0033554,GO:0034976,GO:0043226,GO:0043227,GO:0043229,GO:0043231,GO:0044424,GO:0044444,GO:0044464,GO:0050896,GO:0051716,GO:0140096	5.3.4.1	ko:K09580	ko04141,map04141	-	-	-	ko00000,ko00001,ko01000,ko03110,ko04131,ko04147	-	-	-	Thioredoxin,Thioredoxin_6
lcl|ORF1_TRINITY_DN5151_c0_g1_i4_261_1850	29760.VIT_09s0002g04250.t01	7.57e-269	749.0	COG0526@1|root,KOG0190@2759|Eukaryota,37SXS@33090|Viridiplantae,3G9V2@35493|Streptophyta	35493|Streptophyta	O	protein disulfide isomerase-like	PDIL1-5	GO:0003674,GO:0003756,GO:0003824,GO:0005575,GO:0005622,GO:0005623,GO:0005737,GO:0005783,GO:0006457,GO:0006950,GO:0008150,GO:0009987,GO:0012505,GO:0016853,GO:0016860,GO:0016864,GO:0033554,GO:0034976,GO:0043226,GO:0043227,GO:0043229,GO:0043231,GO:0044424,GO:0044444,GO:0044464,GO:0050896,GO:0051716,GO:0140096	5.3.4.1	ko:K09580	ko04141,map04141	-	-	-	ko00000,ko00001,ko01000,ko03110,ko04131,ko04147	-	-	-	Thioredoxin,Thioredoxin_6
lcl|ORF5_TRINITY_DN6343_c0_g1_i3_233_1822	29760.VIT_09s0002g04250.t01	3.07e-268	748.0	COG0526@1|root,KOG0190@2759|Eukaryota,37SXS@33090|Viridiplantae,3G9V2@35493|Streptophyta	35493|Streptophyta	O	protein disulfide isomerase-like	PDIL1-5	GO:0003674,GO:0003756,GO:0003824,GO:0005575,GO:0005622,GO:0005623,GO:0005737,GO:0005783,GO:0006457,GO:0006950,GO:0008150,GO:0009987,GO:0012505,GO:0016853,GO:0016860,GO:0016864,GO:0033554,GO:0034976,GO:0043226,GO:0043227,GO:0043229,GO:0043231,GO:0044424,GO:0044444,GO:0044464,GO:0050896,GO:0051716,GO:0140096	5.3.4.1	ko:K09580	ko04141,map04141	-	-	-	ko00000,ko00001,ko01000,ko03110,ko04131,ko04147	-	-	-	Thioredoxin,Thioredoxin_6
lcl|ORF1_TRINITY_DN23484_c0_g1_i1_232_1821	29760.VIT_09s0002g04250.t01	2.28e-270	753.0	COG0526@1|root,KOG0190@2759|Eukaryota,37SXS@33090|Viridiplantae,3G9V2@35493|Streptophyta	35493|Streptophyta	O	protein disulfide isomerase-like	PDIL1-5	GO:0003674,GO:0003756,GO:0003824,GO:0005575,GO:0005622,GO:0005623,GO:0005737,GO:0005783,GO:0006457,GO:0006950,GO:0008150,GO:0009987,GO:0012505,GO:0016853,GO:0016860,GO:0016864,GO:0033554,GO:0034976,GO:0043226,GO:0043227,GO:0043229,GO:0043231,GO:0044424,GO:0044444,GO:0044464,GO:0050896,GO:0051716,GO:0140096	5.3.4.1	ko:K09580	ko04141,map04141	-	-	-	ko00000,ko00001,ko01000,ko03110,ko04131,ko04147	-	-	-	Thioredoxin,Thioredoxin_6
lcl|ORF10_TRINITY_DN17136_c0_g1_i1_1296_160	3694.POPTR_0004s09300.1	3.52e-116	350.0	COG5272@1|root,KOG0001@2759|Eukaryota,37T3I@33090|Viridiplantae,3GCEU@35493|Streptophyta,4JTCT@91835|fabids	35493|Streptophyta	O	Ubiquitin-2 like Rad60 SUMO-like	-	-	-	ko:K08770	ko03320,map03320	-	-	-	ko00000,ko00001,ko04121	-	-	-	ubiquitin
lcl|ORF1_TRINITY_DN33904_c0_g1_i1_88_1173	3641.EOY06100	4.69e-110	333.0	COG5272@1|root,KOG0001@2759|Eukaryota,37T3I@33090|Viridiplantae,3GCEU@35493|Streptophyta	35493|Streptophyta	O	Polyubiquitin-like	-	-	-	ko:K08770	ko03320,map03320	-	-	-	ko00000,ko00001,ko04121	-	-	-	ubiquitin
lcl|ORF12_TRINITY_DN76862_c0_g1_i1_1433_297	3641.EOY06100	5.12e-119	357.0	COG5272@1|root,KOG0001@2759|Eukaryota,37T3I@33090|Viridiplantae,3GCEU@35493|Streptophyta	35493|Streptophyta	O	Polyubiquitin-like	-	-	-	ko:K08770	ko03320,map03320	-	-	-	ko00000,ko00001,ko04121	-	-	-	ubiquitin
XP_028066197.1	3641.EOY06100	1.91e-116	350.0	COG5272@1|root,KOG0001@2759|Eukaryota,37T3I@33090|Viridiplantae,3GCEU@35493|Streptophyta	35493|Streptophyta	O	Polyubiquitin-like	-	-	-	ko:K08770	ko03320,map03320	-	-	-	ko00000,ko00001,ko04121	-	-	-	ubiquitin
lcl|ORF10_TRINITY_DN138605_c0_g1_i1_1320_184	3641.EOY06100	4.74e-117	352.0	COG5272@1|root,KOG0001@2759|Eukaryota,37T3I@33090|Viridiplantae,3GCEU@35493|Streptophyta	35493|Streptophyta	O	Polyubiquitin-like	-	-	-	ko:K08770	ko03320,map03320	-	-	-	ko00000,ko00001,ko04121	-	-	-	ubiquitin
lcl|ORF1_TRINITY_DN2874_c0_g1_i1_100_1236	3641.EOY06100	6.72e-117	351.0	COG5272@1|root,KOG0001@2759|Eukaryota,37T3I@33090|Viridiplantae,3GCEU@35493|Streptophyta	35493|Streptophyta	O	Polyubiquitin-like	-	-	-	ko:K08770	ko03320,map03320	-	-	-	ko00000,ko00001,ko04121	-	-	-	ubiquitin
lcl|ORF9_TRINITY_DN1458_c0_g1_i4_1331_198	3641.EOY06100	1.3e-116	350.0	COG5272@1|root,KOG0001@2759|Eukaryota,37T3I@33090|Viridiplantae,3GCEU@35493|Streptophyta	35493|Streptophyta	O	Polyubiquitin-like	-	-	-	ko:K08770	ko03320,map03320	-	-	-	ko00000,ko00001,ko04121	-	-	-	ubiquitin
lcl|ORF10_TRINITY_DN33472_c0_g1_i1_1319_183	3641.EOY06100	1.67e-117	353.0	COG5272@1|root,KOG0001@2759|Eukaryota,37T3I@33090|Viridiplantae,3GCEU@35493|Streptophyta	35493|Streptophyta	O	Polyubiquitin-like	-	-	-	ko:K08770	ko03320,map03320	-	-	-	ko00000,ko00001,ko04121	-	-	-	ubiquitin
XP_028106116.1	3750.XP_008374153.1	6.21e-10	62.8	2CMPU@1|root,2QR9B@2759|Eukaryota,37QKJ@33090|Viridiplantae,3G7SM@35493|Streptophyta,4JKNC@91835|fabids	35493|Streptophyta	-	-	-	GO:0000902,GO:0000904,GO:0005575,GO:0005622,GO:0005623,GO:0005737,GO:0005768,GO:0005769,GO:0005794,GO:0005802,GO:0005829,GO:0006810,GO:0006887,GO:0007275,GO:0008150,GO:0009653,GO:0009826,GO:0009888,GO:0009932,GO:0009987,GO:0010015,GO:0010053,GO:0010054,GO:0012505,GO:0016043,GO:0016049,GO:0016192,GO:0021700,GO:0022622,GO:0030154,GO:0031410,GO:0031982,GO:0031984,GO:0032501,GO:0032502,GO:0032940,GO:…	-	-	-	-	-	-	-	-	-	-	TOM20_plant
lcl|ORF10_TRINITY_DN2805_c0_g1_i2_1057_557	3847.GLYMA17G34940.1	1.76e-98	288.0	KOG1296@1|root,KOG1296@2759|Eukaryota,37TQH@33090|Viridiplantae,3GI0G@35493|Streptophyta,4JP2J@91835|fabids	35493|Streptophyta	S	UPF0587 protein	-	-	-	-	-	-	-	-	-	-	-	-	DUF866
lcl|ORF1_TRINITY_DN13930_c0_g2_i1_67_567	3847.GLYMA17G34940.1	6.15e-99	289.0	KOG1296@1|root,KOG1296@2759|Eukaryota,37TQH@33090|Viridiplantae,3GI0G@35493|Streptophyta,4JP2J@91835|fabids	35493|Streptophyta	S	UPF0587 protein	-	-	-	-	-	-	-	-	-	-	-	-	DUF866
XP_028059984.1	3847.GLYMA17G34940.1	6.15e-99	289.0	KOG1296@1|root,KOG1296@2759|Eukaryota,37TQH@33090|Viridiplantae,3GI0G@35493|Streptophyta,4JP2J@91835|fabids	35493|Streptophyta	S	UPF0587 protein	-	-	-	-	-	-	-	-	-	-	-	-	DUF866
lcl|ORF5_TRINITY_DN7729_c0_g1_i1_1096_596	3847.GLYMA17G34940.1	1.76e-98	288.0	KOG1296@1|root,KOG1296@2759|Eukaryota,37TQH@33090|Viridiplantae,3GI0G@35493|Streptophyta,4JP2J@91835|fabids	35493|Streptophyta	S	UPF0587 protein	-	-	-	-	-	-	-	-	-	-	-	-	DUF866
lcl|ORF5_TRINITY_DN4111_c0_g1_i1_1125_625	3847.GLYMA17G34940.1	6.15e-99	289.0	KOG1296@1|root,KOG1296@2759|Eukaryota,37TQH@33090|Viridiplantae,3GI0G@35493|Streptophyta,4JP2J@91835|fabids	35493|Streptophyta	S	UPF0587 protein	-	-	-	-	-	-	-	-	-	-	-	-	DUF866
lcl|ORF8_TRINITY_DN5740_c0_g1_i6_868_611	3827.XP_004498924.1	5.33e-46	151.0	KOG1296@1|root,KOG1296@2759|Eukaryota,37TQH@33090|Viridiplantae,3GI0G@35493|Streptophyta,4JP2J@91835|fabids	35493|Streptophyta	S	UPF0587 protein	-	-	-	-	-	-	-	-	-	-	-	-	DUF866
lcl|ORF4_TRINITY_DN26893_c0_g1_i1_849_349	3847.GLYMA17G34940.1	1.02e-97	286.0	KOG1296@1|root,KOG1296@2759|Eukaryota,37TQH@33090|Viridiplantae,3GI0G@35493|Streptophyta,4JP2J@91835|fabids	35493|Streptophyta	S	UPF0587 protein	-	-	-	-	-	-	-	-	-	-	-	-	DUF866
lcl|ORF19_TRINITY_DN8369_c0_g1_i14_3702_313	29760.VIT_05s0020g04180.t01	0.0	1427.0	COG4886@1|root,2QWQH@2759|Eukaryota,37I0Y@33090|Viridiplantae,3G9AB@35493|Streptophyta	35493|Streptophyta	T	Leucine-rich repeat protein kinase family protein	-	-	-	-	-	-	-	-	-	-	-	-	EDR1,LRR_8,Pkinase
lcl|ORF10_TRINITY_DN11641_c0_g1_i1_293_3682	29760.VIT_05s0020g04180.t01	0.0	1427.0	COG4886@1|root,2QWQH@2759|Eukaryota,37I0Y@33090|Viridiplantae,3G9AB@35493|Streptophyta	35493|Streptophyta	T	Leucine-rich repeat protein kinase family protein	-	-	-	-	-	-	-	-	-	-	-	-	EDR1,LRR_8,Pkinase
lcl|ORF1_TRINITY_DN2216_c0_g1_i1_321_3710	29760.VIT_05s0020g04180.t01	0.0	1433.0	COG4886@1|root,2QWQH@2759|Eukaryota,37I0Y@33090|Viridiplantae,3G9AB@35493|Streptophyta	35493|Streptophyta	T	Leucine-rich repeat protein kinase family protein	-	-	-	-	-	-	-	-	-	-	-	-	EDR1,LRR_8,Pkinase
XP_028118112.1	29760.VIT_05s0020g04180.t01	0.0	1263.0	COG4886@1|root,2QWQH@2759|Eukaryota,37I0Y@33090|Viridiplantae,3G9AB@35493|Streptophyta	35493|Streptophyta	T	Leucine-rich repeat protein kinase family protein	-	-	-	-	-	-	-	-	-	-	-	-	EDR1,LRR_8,Pkinase
lcl|ORF8_TRINITY_DN13952_c0_g1_i2_68_2713	29760.VIT_05s0020g04180.t01	0.0	1201.0	COG4886@1|root,2QWQH@2759|Eukaryota,37I0Y@33090|Viridiplantae,3G9AB@35493|Streptophyta	35493|Streptophyta	T	Leucine-rich repeat protein kinase family protein	-	-	-	-	-	-	-	-	-	-	-	-	EDR1,LRR_8,Pkinase
lcl|ORF32_TRINITY_DN1430_c1_g1_i1_3581_192	29760.VIT_05s0020g04180.t01	0.0	1421.0	COG4886@1|root,2QWQH@2759|Eukaryota,37I0Y@33090|Viridiplantae,3G9AB@35493|Streptophyta	35493|Streptophyta	T	Leucine-rich repeat protein kinase family protein	-	-	-	-	-	-	-	-	-	-	-	-	EDR1,LRR_8,Pkinase
lcl|ORF3_TRINITY_DN6041_c0_g1_i6_319_3708	29760.VIT_05s0020g04180.t01	0.0	1426.0	COG4886@1|root,2QWQH@2759|Eukaryota,37I0Y@33090|Viridiplantae,3G9AB@35493|Streptophyta	35493|Streptophyta	T	Leucine-rich repeat protein kinase family protein	-	-	-	-	-	-	-	-	-	-	-	-	EDR1,LRR_8,Pkinase
lcl|ORF21_TRINITY_DN9102_c0_g1_i1_3724_335	29760.VIT_05s0020g04180.t01	0.0	1420.0	COG4886@1|root,2QWQH@2759|Eukaryota,37I0Y@33090|Viridiplantae,3G9AB@35493|Streptophyta	35493|Streptophyta	T	Leucine-rich repeat protein kinase family protein	-	-	-	-	-	-	-	-	-	-	-	-	EDR1,LRR_8,Pkinase
lcl|ORF18_TRINITY_DN13263_c0_g1_i3_800_228	29760.VIT_11s0206g00060.t01	1.25e-55	194.0	COG5641@1|root,KOG1601@2759|Eukaryota,37J06@33090|Viridiplantae,3G7F9@35493|Streptophyta	35493|Streptophyta	K	Transcriptional activator that binds specific DNA sequence	-	GO:0000156,GO:0000160,GO:0001101,GO:0003674,GO:0003700,GO:0005575,GO:0005622,GO:0005623,GO:0005634,GO:0006355,GO:0006950,GO:0007154,GO:0007165,GO:0007275,GO:0008150,GO:0009414,GO:0009415,GO:0009628,GO:0009653,GO:0009719,GO:0009725,GO:0009735,GO:0009736,GO:0009755,GO:0009888,GO:0009889,GO:0009966,GO:0009987,GO:0010015,GO:0010033,GO:0010035,GO:0010073,GO:0010074,GO:0010075,GO:0010082,GO:0010380,GO:…	-	ko:K14491	ko04075,map04075	-	-	-	ko00000,ko00001	-	-	-	Myb_DNA-binding,Response_reg
lcl|ORF18_TRINITY_DN4708_c0_g1_i2_1508_255	29760.VIT_11s0206g00060.t01	6.94e-141	425.0	COG5641@1|root,KOG1601@2759|Eukaryota,37J06@33090|Viridiplantae,3G7F9@35493|Streptophyta	35493|Streptophyta	K	Transcriptional activator that binds specific DNA sequence	-	GO:0000156,GO:0000160,GO:0001101,GO:0003674,GO:0003700,GO:0005575,GO:0005622,GO:0005623,GO:0005634,GO:0006355,GO:0006950,GO:0007154,GO:0007165,GO:0007275,GO:0008150,GO:0009414,GO:0009415,GO:0009628,GO:0009653,GO:0009719,GO:0009725,GO:0009735,GO:0009736,GO:0009755,GO:0009888,GO:0009889,GO:0009966,GO:0009987,GO:0010015,GO:0010033,GO:0010035,GO:0010073,GO:0010074,GO:0010075,GO:0010082,GO:0010380,GO:…	-	ko:K14491	ko04075,map04075	-	-	-	ko00000,ko00001	-	-	-	Myb_DNA-binding,Response_reg
XP_028086327.1	29760.VIT_11s0206g00060.t01	5.54e-300	842.0	COG5641@1|root,KOG1601@2759|Eukaryota,37J06@33090|Viridiplantae,3G7F9@35493|Streptophyta	35493|Streptophyta	K	Transcriptional activator that binds specific DNA sequence	-	GO:0000156,GO:0000160,GO:0001101,GO:0003674,GO:0003700,GO:0005575,GO:0005622,GO:0005623,GO:0005634,GO:0006355,GO:0006950,GO:0007154,GO:0007165,GO:0007275,GO:0008150,GO:0009414,GO:0009415,GO:0009628,GO:0009653,GO:0009719,GO:0009725,GO:0009735,GO:0009736,GO:0009755,GO:0009888,GO:0009889,GO:0009966,GO:0009987,GO:0010015,GO:0010033,GO:0010035,GO:0010073,GO:0010074,GO:0010075,GO:0010082,GO:0010380,GO:…	-	ko:K14491	ko04075,map04075	-	-	-	ko00000,ko00001	-	-	-	Myb_DNA-binding,Response_reg
lcl|ORF1_TRINITY_DN46549_c0_g2_i1_63_767	29760.VIT_11s0206g00060.t01	4.4e-68	229.0	COG5641@1|root,KOG1601@2759|Eukaryota,37J06@33090|Viridiplantae,3G7F9@35493|Streptophyta	35493|Streptophyta	K	Transcriptional activator that binds specific DNA sequence	-	GO:0000156,GO:0000160,GO:0001101,GO:0003674,GO:0003700,GO:0005575,GO:0005622,GO:0005623,GO:0005634,GO:0006355,GO:0006950,GO:0007154,GO:0007165,GO:0007275,GO:0008150,GO:0009414,GO:0009415,GO:0009628,GO:0009653,GO:0009719,GO:0009725,GO:0009735,GO:0009736,GO:0009755,GO:0009888,GO:0009889,GO:0009966,GO:0009987,GO:0010015,GO:0010033,GO:0010035,GO:0010073,GO:0010074,GO:0010075,GO:0010082,GO:0010380,GO:…	-	ko:K14491	ko04075,map04075	-	-	-	ko00000,ko00001	-	-	-	Myb_DNA-binding,Response_reg
lcl|ORF20_TRINITY_DN3697_c0_g1_i11_2516_405	29760.VIT_11s0206g00060.t01	4.24e-297	834.0	COG5641@1|root,KOG1601@2759|Eukaryota,37J06@33090|Viridiplantae,3G7F9@35493|Streptophyta	35493|Streptophyta	K	Transcriptional activator that binds specific DNA sequence	-	GO:0000156,GO:0000160,GO:0001101,GO:0003674,GO:0003700,GO:0005575,GO:0005622,GO:0005623,GO:0005634,GO:0006355,GO:0006950,GO:0007154,GO:0007165,GO:0007275,GO:0008150,GO:0009414,GO:0009415,GO:0009628,GO:0009653,GO:0009719,GO:0009725,GO:0009735,GO:0009736,GO:0009755,GO:0009888,GO:0009889,GO:0009966,GO:0009987,GO:0010015,GO:0010033,GO:0010035,GO:0010073,GO:0010074,GO:0010075,GO:0010082,GO:0010380,GO:…	-	ko:K14491	ko04075,map04075	-	-	-	ko00000,ko00001	-	-	-	Myb_DNA-binding,Response_reg
lcl|ORF4_TRINITY_DN29790_c0_g1_i14_667_2316	29760.VIT_11s0206g00060.t01	3.83e-197	574.0	COG5641@1|root,KOG1601@2759|Eukaryota,37J06@33090|Viridiplantae,3G7F9@35493|Streptophyta	35493|Streptophyta	K	Transcriptional activator that binds specific DNA sequence	-	GO:0000156,GO:0000160,GO:0001101,GO:0003674,GO:0003700,GO:0005575,GO:0005622,GO:0005623,GO:0005634,GO:0006355,GO:0006950,GO:0007154,GO:0007165,GO:0007275,GO:0008150,GO:0009414,GO:0009415,GO:0009628,GO:0009653,GO:0009719,GO:0009725,GO:0009735,GO:0009736,GO:0009755,GO:0009888,GO:0009889,GO:0009966,GO:0009987,GO:0010015,GO:0010033,GO:0010035,GO:0010073,GO:0010074,GO:0010075,GO:0010082,GO:0010380,GO:…	-	ko:K14491	ko04075,map04075	-	-	-	ko00000,ko00001	-	-	-	Myb_DNA-binding,Response_reg
lcl|ORF2_TRINITY_DN13213_c0_g1_i3_381_1367	29760.VIT_11s0206g00060.t01	2.84e-108	337.0	COG5641@1|root,KOG1601@2759|Eukaryota,37J06@33090|Viridiplantae,3G7F9@35493|Streptophyta	35493|Streptophyta	K	Transcriptional activator that binds specific DNA sequence	-	GO:0000156,GO:0000160,GO:0001101,GO:0003674,GO:0003700,GO:0005575,GO:0005622,GO:0005623,GO:0005634,GO:0006355,GO:0006950,GO:0007154,GO:0007165,GO:0007275,GO:0008150,GO:0009414,GO:0009415,GO:0009628,GO:0009653,GO:0009719,GO:0009725,GO:0009735,GO:0009736,GO:0009755,GO:0009888,GO:0009889,GO:0009966,GO:0009987,GO:0010015,GO:0010033,GO:0010035,GO:0010073,GO:0010074,GO:0010075,GO:0010082,GO:0010380,GO:…	-	ko:K14491	ko04075,map04075	-	-	-	ko00000,ko00001	-	-	-	Myb_DNA-binding,Response_reg
lcl|ORF7_TRINITY_DN16421_c0_g1_i5_203_1231	102107.XP_008240436.1	3.91e-151	436.0	KOG1990@1|root,KOG1990@2759|Eukaryota,37P5Z@33090|Viridiplantae,3GCJB@35493|Streptophyta,4JHPF@91835|fabids	35493|Streptophyta	L	CRM domain-containing protein	-	-	-	-	-	-	-	-	-	-	-	-	CRS1_YhbY
lcl|ORF2_TRINITY_DN32084_c0_g1_i1_32_604	102107.XP_008240436.1	8.71e-44	156.0	KOG1990@1|root,KOG1990@2759|Eukaryota,37P5Z@33090|Viridiplantae,3GCJB@35493|Streptophyta,4JHPF@91835|fabids	35493|Streptophyta	L	CRM domain-containing protein	-	-	-	-	-	-	-	-	-	-	-	-	CRS1_YhbY
lcl|ORF14_TRINITY_DN5965_c0_g1_i14_3566_2448	102107.XP_008240436.1	7.2e-157	452.0	KOG1990@1|root,KOG1990@2759|Eukaryota,37P5Z@33090|Viridiplantae,3GCJB@35493|Streptophyta,4JHPF@91835|fabids	35493|Streptophyta	L	CRM domain-containing protein	-	-	-	-	-	-	-	-	-	-	-	-	CRS1_YhbY
XP_028122492.1	102107.XP_008240436.1	1.08e-158	456.0	KOG1990@1|root,KOG1990@2759|Eukaryota,37P5Z@33090|Viridiplantae,3GCJB@35493|Streptophyta,4JHPF@91835|fabids	35493|Streptophyta	L	CRM domain-containing protein	-	-	-	-	-	-	-	-	-	-	-	-	CRS1_YhbY
lcl|ORF8_TRINITY_DN8629_c0_g1_i5_59_1174	102107.XP_008240436.1	6.73e-150	434.0	KOG1990@1|root,KOG1990@2759|Eukaryota,37P5Z@33090|Viridiplantae,3GCJB@35493|Streptophyta,4JHPF@91835|fabids	35493|Streptophyta	L	CRM domain-containing protein	-	-	-	-	-	-	-	-	-	-	-	-	CRS1_YhbY
lcl|ORF10_TRINITY_DN11668_c0_g1_i3_56_1171	102107.XP_008240436.1	2.43e-157	453.0	KOG1990@1|root,KOG1990@2759|Eukaryota,37P5Z@33090|Viridiplantae,3GCJB@35493|Streptophyta,4JHPF@91835|fabids	35493|Streptophyta	L	CRM domain-containing protein	-	-	-	-	-	-	-	-	-	-	-	-	CRS1_YhbY
lcl|ORF8_TRINITY_DN3187_c1_g1_i13_50_1168	102107.XP_008240436.1	2.52e-157	453.0	KOG1990@1|root,KOG1990@2759|Eukaryota,37P5Z@33090|Viridiplantae,3GCJB@35493|Streptophyta,4JHPF@91835|fabids	35493|Streptophyta	L	CRM domain-containing protein	-	-	-	-	-	-	-	-	-	-	-	-	CRS1_YhbY
lcl|ORF7_TRINITY_DN2722_c0_g1_i24_188_556	4432.XP_010275782.1	6.96e-67	213.0	KOG1990@1|root,KOG1990@2759|Eukaryota,37P5Z@33090|Viridiplantae,3GCJB@35493|Streptophyta	35493|Streptophyta	L	CRM domain-containing protein	-	-	-	-	-	-	-	-	-	-	-	-	CRS1_YhbY
lcl|ORF1_TRINITY_DN8512_c0_g1_i2_0_2570	3760.EMJ26617	1.15e-300	865.0	28NCE@1|root,2QUXX@2759|Eukaryota,37PFJ@33090|Viridiplantae,3GC3U@35493|Streptophyta,4JG40@91835|fabids	35493|Streptophyta	S	Uncharacterized ACR, COG1678	-	-	-	-	-	-	-	-	-	-	-	-	DUF179,Thioredoxin
lcl|ORF22_TRINITY_DN3555_c0_g2_i1_3601_437	3760.EMJ26617	0.0	1063.0	28NCE@1|root,2QUXX@2759|Eukaryota,37PFJ@33090|Viridiplantae,3GC3U@35493|Streptophyta,4JG40@91835|fabids	35493|Streptophyta	S	Uncharacterized ACR, COG1678	-	-	-	-	-	-	-	-	-	-	-	-	DUF179,Thioredoxin
lcl|ORF8_TRINITY_DN32350_c0_g1_i5_128_3514	102107.XP_008221036.1	0.0	1108.0	28NCE@1|root,2QUXX@2759|Eukaryota,37PFJ@33090|Viridiplantae,3GC3U@35493|Streptophyta,4JG40@91835|fabids	35493|Streptophyta	S	Uncharacterized ACR, COG1678	-	-	-	-	-	-	-	-	-	-	-	-	DUF179,Thioredoxin
XP_028119984.1	102107.XP_008221036.1	0.0	1114.0	28NCE@1|root,2QUXX@2759|Eukaryota,37PFJ@33090|Viridiplantae,3GC3U@35493|Streptophyta,4JG40@91835|fabids	35493|Streptophyta	S	Uncharacterized ACR, COG1678	-	-	-	-	-	-	-	-	-	-	-	-	DUF179,Thioredoxin
lcl|ORF5_TRINITY_DN11449_c0_g1_i5_1057_3555	3760.EMJ26617	8.49e-294	847.0	28NCE@1|root,2QUXX@2759|Eukaryota,37PFJ@33090|Viridiplantae,3GC3U@35493|Streptophyta,4JG40@91835|fabids	35493|Streptophyta	S	Uncharacterized ACR, COG1678	-	-	-	-	-	-	-	-	-	-	-	-	DUF179,Thioredoxin
lcl|ORF8_TRINITY_DN2051_c2_g1_i1_128_3511	3760.EMJ26617	0.0	1107.0	28NCE@1|root,2QUXX@2759|Eukaryota,37PFJ@33090|Viridiplantae,3GC3U@35493|Streptophyta,4JG40@91835|fabids	35493|Streptophyta	S	Uncharacterized ACR, COG1678	-	-	-	-	-	-	-	-	-	-	-	-	DUF179,Thioredoxin
lcl|ORF3_TRINITY_DN14900_c0_g1_i3_1273_3546	3760.EMJ26617	4.1e-262	763.0	28NCE@1|root,2QUXX@2759|Eukaryota,37PFJ@33090|Viridiplantae,3GC3U@35493|Streptophyta,4JG40@91835|fabids	35493|Streptophyta	S	Uncharacterized ACR, COG1678	-	-	-	-	-	-	-	-	-	-	-	-	DUF179,Thioredoxin
lcl|ORF9_TRINITY_DN823_c2_g1_i3_275_2845	3760.EMJ26617	9.7e-305	875.0	28NCE@1|root,2QUXX@2759|Eukaryota,37PFJ@33090|Viridiplantae,3GC3U@35493|Streptophyta,4JG40@91835|fabids	35493|Streptophyta	S	Uncharacterized ACR, COG1678	-	-	-	-	-	-	-	-	-	-	-	-	DUF179,Thioredoxin
lcl|ORF5_TRINITY_DN6244_c0_g1_i2_838_218	29730.Gorai.010G256400.1	3.14e-112	329.0	COG0098@1|root,KOG0877@2759|Eukaryota,37JP5@33090|Viridiplantae,3G9AK@35493|Streptophyta	35493|Streptophyta	J	Belongs to the universal ribosomal protein uS5 family	-	GO:0000313,GO:0000314,GO:0003002,GO:0003674,GO:0003735,GO:0005198,GO:0005575,GO:0005622,GO:0005623,GO:0005634,GO:0005737,GO:0005739,GO:0005759,GO:0005761,GO:0005763,GO:0005840,GO:0006139,GO:0006364,GO:0006396,GO:0006412,GO:0006518,GO:0006725,GO:0006807,GO:0006950,GO:0006996,GO:0007275,GO:0007389,GO:0008150,GO:0008152,GO:0009058,GO:0009059,GO:0009266,GO:0009409,GO:0009507,GO:0009532,GO:0009534,GO:…	-	ko:K02988	ko03010,map03010	M00178,M00179	-	-	br01610,ko00000,ko00001,ko00002,ko03011	-	-	-	Ribosomal_S5,Ribosomal_S5_C
lcl|ORF2_TRINITY_DN13336_c0_g1_i1_46_990	3847.GLYMA13G24640.1	4.41e-149	428.0	COG0098@1|root,KOG0877@2759|Eukaryota,37JP5@33090|Viridiplantae,3G9AK@35493|Streptophyta,4JN4C@91835|fabids	35493|Streptophyta	J	Belongs to the universal ribosomal protein uS5 family	-	GO:0000313,GO:0000314,GO:0003002,GO:0003674,GO:0003735,GO:0005198,GO:0005575,GO:0005622,GO:0005623,GO:0005634,GO:0005737,GO:0005739,GO:0005759,GO:0005761,GO:0005763,GO:0005840,GO:0006139,GO:0006364,GO:0006396,GO:0006412,GO:0006518,GO:0006725,GO:0006807,GO:0006950,GO:0006996,GO:0007275,GO:0007389,GO:0008150,GO:0008152,GO:0009058,GO:0009059,GO:0009266,GO:0009409,GO:0009507,GO:0009532,GO:0009534,GO:…	-	ko:K02988	ko03010,map03010	M00178,M00179	-	-	br01610,ko00000,ko00001,ko00002,ko03011	-	-	-	Ribosomal_S5,Ribosomal_S5_C
lcl|ORF2_TRINITY_DN88698_c0_g1_i1_94_1029	3847.GLYMA13G24640.1	4.56e-148	425.0	COG0098@1|root,KOG0877@2759|Eukaryota,37JP5@33090|Viridiplantae,3G9AK@35493|Streptophyta,4JN4C@91835|fabids	35493|Streptophyta	J	Belongs to the universal ribosomal protein uS5 family	-	GO:0000313,GO:0000314,GO:0003002,GO:0003674,GO:0003735,GO:0005198,GO:0005575,GO:0005622,GO:0005623,GO:0005634,GO:0005737,GO:0005739,GO:0005759,GO:0005761,GO:0005763,GO:0005840,GO:0006139,GO:0006364,GO:0006396,GO:0006412,GO:0006518,GO:0006725,GO:0006807,GO:0006950,GO:0006996,GO:0007275,GO:0007389,GO:0008150,GO:0008152,GO:0009058,GO:0009059,GO:0009266,GO:0009409,GO:0009507,GO:0009532,GO:0009534,GO:…	-	ko:K02988	ko03010,map03010	M00178,M00179	-	-	br01610,ko00000,ko00001,ko00002,ko03011	-	-	-	Ribosomal_S5,Ribosomal_S5_C
XP_028119213.1	3847.GLYMA13G24640.1	9.19e-148	424.0	COG0098@1|root,KOG0877@2759|Eukaryota,37JP5@33090|Viridiplantae,3G9AK@35493|Streptophyta,4JN4C@91835|fabids	35493|Streptophyta	J	Belongs to the universal ribosomal protein uS5 family	-	GO:0000313,GO:0000314,GO:0003002,GO:0003674,GO:0003735,GO:0005198,GO:0005575,GO:0005622,GO:0005623,GO:0005634,GO:0005737,GO:0005739,GO:0005759,GO:0005761,GO:0005763,GO:0005840,GO:0006139,GO:0006364,GO:0006396,GO:0006412,GO:0006518,GO:0006725,GO:0006807,GO:0006950,GO:0006996,GO:0007275,GO:0007389,GO:0008150,GO:0008152,GO:0009058,GO:0009059,GO:0009266,GO:0009409,GO:0009507,GO:0009532,GO:0009534,GO:…	-	ko:K02988	ko03010,map03010	M00178,M00179	-	-	br01610,ko00000,ko00001,ko00002,ko03011	-	-	-	Ribosomal_S5,Ribosomal_S5_C
lcl|ORF1_TRINITY_DN4199_c0_g1_i1_79_1014	3847.GLYMA13G24640.1	4.56e-148	425.0	COG0098@1|root,KOG0877@2759|Eukaryota,37JP5@33090|Viridiplantae,3G9AK@35493|Streptophyta,4JN4C@91835|fabids	35493|Streptophyta	J	Belongs to the universal ribosomal protein uS5 family	-	GO:0000313,GO:0000314,GO:0003002,GO:0003674,GO:0003735,GO:0005198,GO:0005575,GO:0005622,GO:0005623,GO:0005634,GO:0005737,GO:0005739,GO:0005759,GO:0005761,GO:0005763,GO:0005840,GO:0006139,GO:0006364,GO:0006396,GO:0006412,GO:0006518,GO:0006725,GO:0006807,GO:0006950,GO:0006996,GO:0007275,GO:0007389,GO:0008150,GO:0008152,GO:0009058,GO:0009059,GO:0009266,GO:0009409,GO:0009507,GO:0009532,GO:0009534,GO:…	-	ko:K02988	ko03010,map03010	M00178,M00179	-	-	br01610,ko00000,ko00001,ko00002,ko03011	-	-	-	Ribosomal_S5,Ribosomal_S5_C
lcl|ORF1_TRINITY_DN15509_c0_g1_i1_108_1043	3847.GLYMA13G24640.1	4.56e-148	425.0	COG0098@1|root,KOG0877@2759|Eukaryota,37JP5@33090|Viridiplantae,3G9AK@35493|Streptophyta,4JN4C@91835|fabids	35493|Streptophyta	J	Belongs to the universal ribosomal protein uS5 family	-	GO:0000313,GO:0000314,GO:0003002,GO:0003674,GO:0003735,GO:0005198,GO:0005575,GO:0005622,GO:0005623,GO:0005634,GO:0005737,GO:0005739,GO:0005759,GO:0005761,GO:0005763,GO:0005840,GO:0006139,GO:0006364,GO:0006396,GO:0006412,GO:0006518,GO:0006725,GO:0006807,GO:0006950,GO:0006996,GO:0007275,GO:0007389,GO:0008150,GO:0008152,GO:0009058,GO:0009059,GO:0009266,GO:0009409,GO:0009507,GO:0009532,GO:0009534,GO:…	-	ko:K02988	ko03010,map03010	M00178,M00179	-	-	br01610,ko00000,ko00001,ko00002,ko03011	-	-	-	Ribosomal_S5,Ribosomal_S5_C
lcl|ORF6_TRINITY_DN8986_c0_g1_i1_1230_295	3847.GLYMA13G24640.1	1.12e-148	427.0	COG0098@1|root,KOG0877@2759|Eukaryota,37JP5@33090|Viridiplantae,3G9AK@35493|Streptophyta,4JN4C@91835|fabids	35493|Streptophyta	J	Belongs to the universal ribosomal protein uS5 family	-	GO:0000313,GO:0000314,GO:0003002,GO:0003674,GO:0003735,GO:0005198,GO:0005575,GO:0005622,GO:0005623,GO:0005634,GO:0005737,GO:0005739,GO:0005759,GO:0005761,GO:0005763,GO:0005840,GO:0006139,GO:0006364,GO:0006396,GO:0006412,GO:0006518,GO:0006725,GO:0006807,GO:0006950,GO:0006996,GO:0007275,GO:0007389,GO:0008150,GO:0008152,GO:0009058,GO:0009059,GO:0009266,GO:0009409,GO:0009507,GO:0009532,GO:0009534,GO:…	-	ko:K02988	ko03010,map03010	M00178,M00179	-	-	br01610,ko00000,ko00001,ko00002,ko03011	-	-	-	Ribosomal_S5,Ribosomal_S5_C
lcl|ORF6_TRINITY_DN1423_c0_g1_i1_1145_219	3847.GLYMA13G24640.1	7.05e-149	427.0	COG0098@1|root,KOG0877@2759|Eukaryota,37JP5@33090|Viridiplantae,3G9AK@35493|Streptophyta,4JN4C@91835|fabids	35493|Streptophyta	J	Belongs to the universal ribosomal protein uS5 family	-	GO:0000313,GO:0000314,GO:0003002,GO:0003674,GO:0003735,GO:0005198,GO:0005575,GO:0005622,GO:0005623,GO:0005634,GO:0005737,GO:0005739,GO:0005759,GO:0005761,GO:0005763,GO:0005840,GO:0006139,GO:0006364,GO:0006396,GO:0006412,GO:0006518,GO:0006725,GO:0006807,GO:0006950,GO:0006996,GO:0007275,GO:0007389,GO:0008150,GO:0008152,GO:0009058,GO:0009059,GO:0009266,GO:0009409,GO:0009507,GO:0009532,GO:0009534,GO:…	-	ko:K02988	ko03010,map03010	M00178,M00179	-	-	br01610,ko00000,ko00001,ko00002,ko03011	-	-	-	Ribosomal_S5,Ribosomal_S5_C
lcl|ORF2_TRINITY_DN6236_c0_g1_i2_289_4062	29760.VIT_19s0014g03360.t01	0.0	2132.0	KOG1931@1|root,KOG1931@2759|Eukaryota,37MRQ@33090|Viridiplantae,3GEBD@35493|Streptophyta	35493|Streptophyta	S	trafficking protein particle complex	-	GO:0000278,GO:0000281,GO:0000910,GO:0000911,GO:0000919,GO:0005575,GO:0005622,GO:0005623,GO:0005737,GO:0005768,GO:0005794,GO:0005802,GO:0006810,GO:0006891,GO:0007049,GO:0008150,GO:0009987,GO:0012505,GO:0016043,GO:0016192,GO:0016197,GO:0016482,GO:0022402,GO:0022607,GO:0030008,GO:0031410,GO:0031982,GO:0031984,GO:0032506,GO:0032991,GO:0034498,GO:0042147,GO:0043226,GO:0043227,GO:0043229,GO:0043231,GO:…	-	ko:K20307	-	-	-	-	ko00000,ko04131	-	-	-	Foie-gras_1,TRAPPC10
lcl|ORF1_TRINITY_DN15282_c1_g1_i2_210_3986	29760.VIT_19s0014g03360.t01	0.0	2136.0	KOG1931@1|root,KOG1931@2759|Eukaryota,37MRQ@33090|Viridiplantae,3GEBD@35493|Streptophyta	35493|Streptophyta	S	trafficking protein particle complex	-	GO:0000278,GO:0000281,GO:0000910,GO:0000911,GO:0000919,GO:0005575,GO:0005622,GO:0005623,GO:0005737,GO:0005768,GO:0005794,GO:0005802,GO:0006810,GO:0006891,GO:0007049,GO:0008150,GO:0009987,GO:0012505,GO:0016043,GO:0016192,GO:0016197,GO:0016482,GO:0022402,GO:0022607,GO:0030008,GO:0031410,GO:0031982,GO:0031984,GO:0032506,GO:0032991,GO:0034498,GO:0042147,GO:0043226,GO:0043227,GO:0043229,GO:0043231,GO:…	-	ko:K20307	-	-	-	-	ko00000,ko04131	-	-	-	Foie-gras_1,TRAPPC10
lcl|ORF22_TRINITY_DN4131_c0_g1_i28_3727_401	29760.VIT_19s0014g03360.t01	0.0	1848.0	KOG1931@1|root,KOG1931@2759|Eukaryota,37MRQ@33090|Viridiplantae,3GEBD@35493|Streptophyta	35493|Streptophyta	S	trafficking protein particle complex	-	GO:0000278,GO:0000281,GO:0000910,GO:0000911,GO:0000919,GO:0005575,GO:0005622,GO:0005623,GO:0005737,GO:0005768,GO:0005794,GO:0005802,GO:0006810,GO:0006891,GO:0007049,GO:0008150,GO:0009987,GO:0012505,GO:0016043,GO:0016192,GO:0016197,GO:0016482,GO:0022402,GO:0022607,GO:0030008,GO:0031410,GO:0031982,GO:0031984,GO:0032506,GO:0032991,GO:0034498,GO:0042147,GO:0043226,GO:0043227,GO:0043229,GO:0043231,GO:…	-	ko:K20307	-	-	-	-	ko00000,ko04131	-	-	-	Foie-gras_1,TRAPPC10
XP_028082703.1	29760.VIT_19s0014g03360.t01	0.0	2015.0	KOG1931@1|root,KOG1931@2759|Eukaryota,37MRQ@33090|Viridiplantae,3GEBD@35493|Streptophyta	35493|Streptophyta	S	trafficking protein particle complex	-	GO:0000278,GO:0000281,GO:0000910,GO:0000911,GO:0000919,GO:0005575,GO:0005622,GO:0005623,GO:0005737,GO:0005768,GO:0005794,GO:0005802,GO:0006810,GO:0006891,GO:0007049,GO:0008150,GO:0009987,GO:0012505,GO:0016043,GO:0016192,GO:0016197,GO:0016482,GO:0022402,GO:0022607,GO:0030008,GO:0031410,GO:0031982,GO:0031984,GO:0032506,GO:0032991,GO:0034498,GO:0042147,GO:0043226,GO:0043227,GO:0043229,GO:0043231,GO:…	-	ko:K20307	-	-	-	-	ko00000,ko04131	-	-	-	Foie-gras_1,TRAPPC10
lcl|ORF2_TRINITY_DN4084_c0_g2_i11_226_4002	29760.VIT_19s0014g03360.t01	0.0	2132.0	KOG1931@1|root,KOG1931@2759|Eukaryota,37MRQ@33090|Viridiplantae,3GEBD@35493|Streptophyta	35493|Streptophyta	S	trafficking protein particle complex	-	GO:0000278,GO:0000281,GO:0000910,GO:0000911,GO:0000919,GO:0005575,GO:0005622,GO:0005623,GO:0005737,GO:0005768,GO:0005794,GO:0005802,GO:0006810,GO:0006891,GO:0007049,GO:0008150,GO:0009987,GO:0012505,GO:0016043,GO:0016192,GO:0016197,GO:0016482,GO:0022402,GO:0022607,GO:0030008,GO:0031410,GO:0031982,GO:0031984,GO:0032506,GO:0032991,GO:0034498,GO:0042147,GO:0043226,GO:0043227,GO:0043229,GO:0043231,GO:…	-	ko:K20307	-	-	-	-	ko00000,ko04131	-	-	-	Foie-gras_1,TRAPPC10
lcl|ORF14_TRINITY_DN5761_c0_g1_i1_4115_339	29760.VIT_19s0014g03360.t01	0.0	2132.0	KOG1931@1|root,KOG1931@2759|Eukaryota,37MRQ@33090|Viridiplantae,3GEBD@35493|Streptophyta	35493|Streptophyta	S	trafficking protein particle complex	-	GO:0000278,GO:0000281,GO:0000910,GO:0000911,GO:0000919,GO:0005575,GO:0005622,GO:0005623,GO:0005737,GO:0005768,GO:0005794,GO:0005802,GO:0006810,GO:0006891,GO:0007049,GO:0008150,GO:0009987,GO:0012505,GO:0016043,GO:0016192,GO:0016197,GO:0016482,GO:0022402,GO:0022607,GO:0030008,GO:0031410,GO:0031982,GO:0031984,GO:0032506,GO:0032991,GO:0034498,GO:0042147,GO:0043226,GO:0043227,GO:0043229,GO:0043231,GO:…	-	ko:K20307	-	-	-	-	ko00000,ko04131	-	-	-	Foie-gras_1,TRAPPC10
lcl|ORF24_TRINITY_DN2194_c0_g1_i4_4098_322	29760.VIT_19s0014g03360.t01	0.0	2131.0	KOG1931@1|root,KOG1931@2759|Eukaryota,37MRQ@33090|Viridiplantae,3GEBD@35493|Streptophyta	35493|Streptophyta	S	trafficking protein particle complex	-	GO:0000278,GO:0000281,GO:0000910,GO:0000911,GO:0000919,GO:0005575,GO:0005622,GO:0005623,GO:0005737,GO:0005768,GO:0005794,GO:0005802,GO:0006810,GO:0006891,GO:0007049,GO:0008150,GO:0009987,GO:0012505,GO:0016043,GO:0016192,GO:0016197,GO:0016482,GO:0022402,GO:0022607,GO:0030008,GO:0031410,GO:0031982,GO:0031984,GO:0032506,GO:0032991,GO:0034498,GO:0042147,GO:0043226,GO:0043227,GO:0043229,GO:0043231,GO:…	-	ko:K20307	-	-	-	-	ko00000,ko04131	-	-	-	Foie-gras_1,TRAPPC10
lcl|ORF36_TRINITY_DN611_c0_g1_i34_3311_318	29760.VIT_19s0014g03360.t01	0.0	1643.0	KOG1931@1|root,KOG1931@2759|Eukaryota,37MRQ@33090|Viridiplantae,3GEBD@35493|Streptophyta	35493|Streptophyta	S	trafficking protein particle complex	-	GO:0000278,GO:0000281,GO:0000910,GO:0000911,GO:0000919,GO:0005575,GO:0005622,GO:0005623,GO:0005737,GO:0005768,GO:0005794,GO:0005802,GO:0006810,GO:0006891,GO:0007049,GO:0008150,GO:0009987,GO:0012505,GO:0016043,GO:0016192,GO:0016197,GO:0016482,GO:0022402,GO:0022607,GO:0030008,GO:0031410,GO:0031982,GO:0031984,GO:0032506,GO:0032991,GO:0034498,GO:0042147,GO:0043226,GO:0043227,GO:0043229,GO:0043231,GO:…	-	ko:K20307	-	-	-	-	ko00000,ko04131	-	-	-	Foie-gras_1,TRAPPC10
lcl|ORF5_TRINITY_DN7491_c0_g1_i42_164_1489	29760.VIT_06s0009g01060.t01	3.48e-295	818.0	KOG1151@1|root,KOG1151@2759|Eukaryota,37QNF@33090|Viridiplantae,3GAMN@35493|Streptophyta	35493|Streptophyta	T	serine threonine-protein kinase	-	GO:0003674,GO:0003824,GO:0004672,GO:0004674,GO:0005488,GO:0005515,GO:0005575,GO:0005622,GO:0005623,GO:0005634,GO:0005737,GO:0006464,GO:0006468,GO:0006793,GO:0006796,GO:0006807,GO:0008150,GO:0008152,GO:0009507,GO:0009536,GO:0009987,GO:0010468,GO:0016301,GO:0016310,GO:0016740,GO:0016772,GO:0016773,GO:0019222,GO:0019538,GO:0036211,GO:0042802,GO:0043170,GO:0043226,GO:0043227,GO:0043229,GO:0043231,GO:…	2.7.11.1	ko:K08864	-	-	-	-	ko00000,ko01000,ko01001	-	-	-	Pkinase
lcl|ORF8_TRINITY_DN31548_c0_g1_i2_608_2656	29760.VIT_06s0009g01060.t01	0.0	1070.0	KOG1151@1|root,KOG1151@2759|Eukaryota,37QNF@33090|Viridiplantae,3GAMN@35493|Streptophyta	35493|Streptophyta	T	serine threonine-protein kinase	-	GO:0003674,GO:0003824,GO:0004672,GO:0004674,GO:0005488,GO:0005515,GO:0005575,GO:0005622,GO:0005623,GO:0005634,GO:0005737,GO:0006464,GO:0006468,GO:0006793,GO:0006796,GO:0006807,GO:0008150,GO:0008152,GO:0009507,GO:0009536,GO:0009987,GO:0010468,GO:0016301,GO:0016310,GO:0016740,GO:0016772,GO:0016773,GO:0019222,GO:0019538,GO:0036211,GO:0042802,GO:0043170,GO:0043226,GO:0043227,GO:0043229,GO:0043231,GO:…	2.7.11.1	ko:K08864	-	-	-	-	ko00000,ko01000,ko01001	-	-	-	Pkinase
lcl|ORF1_TRINITY_DN20045_c0_g1_i5_567_2615	29760.VIT_06s0009g01060.t01	0.0	1070.0	KOG1151@1|root,KOG1151@2759|Eukaryota,37QNF@33090|Viridiplantae,3GAMN@35493|Streptophyta	35493|Streptophyta	T	serine threonine-protein kinase	-	GO:0003674,GO:0003824,GO:0004672,GO:0004674,GO:0005488,GO:0005515,GO:0005575,GO:0005622,GO:0005623,GO:0005634,GO:0005737,GO:0006464,GO:0006468,GO:0006793,GO:0006796,GO:0006807,GO:0008150,GO:0008152,GO:0009507,GO:0009536,GO:0009987,GO:0010468,GO:0016301,GO:0016310,GO:0016740,GO:0016772,GO:0016773,GO:0019222,GO:0019538,GO:0036211,GO:0042802,GO:0043170,GO:0043226,GO:0043227,GO:0043229,GO:0043231,GO:…	2.7.11.1	ko:K08864	-	-	-	-	ko00000,ko01000,ko01001	-	-	-	Pkinase
XP_028062308.1	29760.VIT_06s0009g01060.t01	0.0	1059.0	KOG1151@1|root,KOG1151@2759|Eukaryota,37QNF@33090|Viridiplantae,3GAMN@35493|Streptophyta	35493|Streptophyta	T	serine threonine-protein kinase	-	GO:0003674,GO:0003824,GO:0004672,GO:0004674,GO:0005488,GO:0005515,GO:0005575,GO:0005622,GO:0005623,GO:0005634,GO:0005737,GO:0006464,GO:0006468,GO:0006793,GO:0006796,GO:0006807,GO:0008150,GO:0008152,GO:0009507,GO:0009536,GO:0009987,GO:0010468,GO:0016301,GO:0016310,GO:0016740,GO:0016772,GO:0016773,GO:0019222,GO:0019538,GO:0036211,GO:0042802,GO:0043170,GO:0043226,GO:0043227,GO:0043229,GO:0043231,GO:…	2.7.11.1	ko:K08864	-	-	-	-	ko00000,ko01000,ko01001	-	-	-	Pkinase
lcl|ORF15_TRINITY_DN61400_c0_g1_i3_2372_324	29760.VIT_06s0009g01060.t01	0.0	1070.0	KOG1151@1|root,KOG1151@2759|Eukaryota,37QNF@33090|Viridiplantae,3GAMN@35493|Streptophyta	35493|Streptophyta	T	serine threonine-protein kinase	-	GO:0003674,GO:0003824,GO:0004672,GO:0004674,GO:0005488,GO:0005515,GO:0005575,GO:0005622,GO:0005623,GO:0005634,GO:0005737,GO:0006464,GO:0006468,GO:0006793,GO:0006796,GO:0006807,GO:0008150,GO:0008152,GO:0009507,GO:0009536,GO:0009987,GO:0010468,GO:0016301,GO:0016310,GO:0016740,GO:0016772,GO:0016773,GO:0019222,GO:0019538,GO:0036211,GO:0042802,GO:0043170,GO:0043226,GO:0043227,GO:0043229,GO:0043231,GO:…	2.7.11.1	ko:K08864	-	-	-	-	ko00000,ko01000,ko01001	-	-	-	Pkinase
lcl|ORF7_TRINITY_DN16339_c0_g1_i5_602_2650	29760.VIT_06s0009g01060.t01	0.0	1069.0	KOG1151@1|root,KOG1151@2759|Eukaryota,37QNF@33090|Viridiplantae,3GAMN@35493|Streptophyta	35493|Streptophyta	T	serine threonine-protein kinase	-	GO:0003674,GO:0003824,GO:0004672,GO:0004674,GO:0005488,GO:0005515,GO:0005575,GO:0005622,GO:0005623,GO:0005634,GO:0005737,GO:0006464,GO:0006468,GO:0006793,GO:0006796,GO:0006807,GO:0008150,GO:0008152,GO:0009507,GO:0009536,GO:0009987,GO:0010468,GO:0016301,GO:0016310,GO:0016740,GO:0016772,GO:0016773,GO:0019222,GO:0019538,GO:0036211,GO:0042802,GO:0043170,GO:0043226,GO:0043227,GO:0043229,GO:0043231,GO:…	2.7.11.1	ko:K08864	-	-	-	-	ko00000,ko01000,ko01001	-	-	-	Pkinase
lcl|ORF7_TRINITY_DN17852_c0_g1_i6_488_2536	29760.VIT_06s0009g01060.t01	0.0	1070.0	KOG1151@1|root,KOG1151@2759|Eukaryota,37QNF@33090|Viridiplantae,3GAMN@35493|Streptophyta	35493|Streptophyta	T	serine threonine-protein kinase	-	GO:0003674,GO:0003824,GO:0004672,GO:0004674,GO:0005488,GO:0005515,GO:0005575,GO:0005622,GO:0005623,GO:0005634,GO:0005737,GO:0006464,GO:0006468,GO:0006793,GO:0006796,GO:0006807,GO:0008150,GO:0008152,GO:0009507,GO:0009536,GO:0009987,GO:0010468,GO:0016301,GO:0016310,GO:0016740,GO:0016772,GO:0016773,GO:0019222,GO:0019538,GO:0036211,GO:0042802,GO:0043170,GO:0043226,GO:0043227,GO:0043229,GO:0043231,GO:…	2.7.11.1	ko:K08864	-	-	-	-	ko00000,ko01000,ko01001	-	-	-	Pkinase
lcl|ORF1_TRINITY_DN33841_c0_g1_i1_10_1320	29760.VIT_06s0009g01060.t01	8.95e-292	809.0	KOG1151@1|root,KOG1151@2759|Eukaryota,37QNF@33090|Viridiplantae,3GAMN@35493|Streptophyta	35493|Streptophyta	T	serine threonine-protein kinase	-	GO:0003674,GO:0003824,GO:0004672,GO:0004674,GO:0005488,GO:0005515,GO:0005575,GO:0005622,GO:0005623,GO:0005634,GO:0005737,GO:0006464,GO:0006468,GO:0006793,GO:0006796,GO:0006807,GO:0008150,GO:0008152,GO:0009507,GO:0009536,GO:0009987,GO:0010468,GO:0016301,GO:0016310,GO:0016740,GO:0016772,GO:0016773,GO:0019222,GO:0019538,GO:0036211,GO:0042802,GO:0043170,GO:0043226,GO:0043227,GO:0043229,GO:0043231,GO:…	2.7.11.1	ko:K08864	-	-	-	-	ko00000,ko01000,ko01001	-	-	-	Pkinase
lcl|ORF2_TRINITY_DN7471_c0_g1_i1_412_675	3702.AT3G56030.1	4.95e-19	86.7	KOG4197@1|root,KOG4197@2759|Eukaryota,37NDW@33090|Viridiplantae,3GFI5@35493|Streptophyta,3HQK6@3699|Brassicales	35493|Streptophyta	S	Pentatricopeptide repeat-containing protein	-	GO:0003674,GO:0003676,GO:0003723,GO:0003824,GO:0004518,GO:0004519,GO:0005488,GO:0005575,GO:0005622,GO:0005623,GO:0005737,GO:0005739,GO:0006139,GO:0006725,GO:0006807,GO:0008150,GO:0008152,GO:0009451,GO:0009987,GO:0016070,GO:0016787,GO:0016788,GO:0034641,GO:0043170,GO:0043226,GO:0043227,GO:0043229,GO:0043231,GO:0043412,GO:0044237,GO:0044238,GO:0044424,GO:0044444,GO:0044464,GO:0046483,GO:0071704,GO:…	-	ko:K17426	-	-	-	-	br01610,ko00000,ko03011	-	-	-	PPR,PPR_1,PPR_2
lcl|ORF1_TRINITY_DN13326_c0_g1_i1_364_963	4096.XP_009799197.1	1.19e-45	160.0	KOG4197@1|root,KOG4197@2759|Eukaryota,37NDW@33090|Viridiplantae,3GFI5@35493|Streptophyta,44J3J@71274|asterids	35493|Streptophyta	S	Pentatricopeptide repeat-containing protein	-	GO:0003674,GO:0003676,GO:0003723,GO:0003824,GO:0004518,GO:0004519,GO:0005488,GO:0005575,GO:0005622,GO:0005623,GO:0005737,GO:0005739,GO:0006139,GO:0006725,GO:0006807,GO:0008150,GO:0008152,GO:0009451,GO:0009987,GO:0016070,GO:0016787,GO:0016788,GO:0034641,GO:0043170,GO:0043226,GO:0043227,GO:0043229,GO:0043231,GO:0043412,GO:0044237,GO:0044238,GO:0044424,GO:0044444,GO:0044464,GO:0046483,GO:0071704,GO:…	-	ko:K17426	-	-	-	-	br01610,ko00000,ko03011	-	-	-	PPR,PPR_1,PPR_2
lcl|ORF4_TRINITY_DN19150_c0_g1_i1_1058_69	3641.EOY17722	1.3e-58	199.0	KOG4197@1|root,KOG4197@2759|Eukaryota,37NDW@33090|Viridiplantae,3GFI5@35493|Streptophyta	35493|Streptophyta	S	Pentatricopeptide repeat-containing protein	-	GO:0003674,GO:0003676,GO:0003723,GO:0003824,GO:0004518,GO:0004519,GO:0005488,GO:0005575,GO:0005622,GO:0005623,GO:0005737,GO:0005739,GO:0006139,GO:0006725,GO:0006807,GO:0008150,GO:0008152,GO:0009451,GO:0009987,GO:0016070,GO:0016787,GO:0016788,GO:0034641,GO:0043170,GO:0043226,GO:0043227,GO:0043229,GO:0043231,GO:0043412,GO:0044237,GO:0044238,GO:0044424,GO:0044444,GO:0044464,GO:0046483,GO:0071704,GO:…	-	ko:K17426	-	-	-	-	br01610,ko00000,ko03011	-	-	-	PPR,PPR_1,PPR_2
XP_028057682.1	3641.EOY17722	4.36e-59	201.0	KOG4197@1|root,KOG4197@2759|Eukaryota,37NDW@33090|Viridiplantae,3GFI5@35493|Streptophyta	35493|Streptophyta	S	Pentatricopeptide repeat-containing protein	-	GO:0003674,GO:0003676,GO:0003723,GO:0003824,GO:0004518,GO:0004519,GO:0005488,GO:0005575,GO:0005622,GO:0005623,GO:0005737,GO:0005739,GO:0006139,GO:0006725,GO:0006807,GO:0008150,GO:0008152,GO:0009451,GO:0009987,GO:0016070,GO:0016787,GO:0016788,GO:0034641,GO:0043170,GO:0043226,GO:0043227,GO:0043229,GO:0043231,GO:0043412,GO:0044237,GO:0044238,GO:0044424,GO:0044444,GO:0044464,GO:0046483,GO:0071704,GO:…	-	ko:K17426	-	-	-	-	br01610,ko00000,ko03011	-	-	-	PPR,PPR_1,PPR_2
lcl|ORF6_TRINITY_DN8607_c0_g1_i4_1307_324	3641.EOY17722	7.84e-60	202.0	KOG4197@1|root,KOG4197@2759|Eukaryota,37NDW@33090|Viridiplantae,3GFI5@35493|Streptophyta	35493|Streptophyta	S	Pentatricopeptide repeat-containing protein	-	GO:0003674,GO:0003676,GO:0003723,GO:0003824,GO:0004518,GO:0004519,GO:0005488,GO:0005575,GO:0005622,GO:0005623,GO:0005737,GO:0005739,GO:0006139,GO:0006725,GO:0006807,GO:0008150,GO:0008152,GO:0009451,GO:0009987,GO:0016070,GO:0016787,GO:0016788,GO:0034641,GO:0043170,GO:0043226,GO:0043227,GO:0043229,GO:0043231,GO:0043412,GO:0044237,GO:0044238,GO:0044424,GO:0044444,GO:0044464,GO:0046483,GO:0071704,GO:…	-	ko:K17426	-	-	-	-	br01610,ko00000,ko03011	-	-	-	PPR,PPR_1,PPR_2
lcl|ORF1_TRINITY_DN56516_c0_g1_i1_131_1114	3641.EOY17722	2.19e-59	201.0	KOG4197@1|root,KOG4197@2759|Eukaryota,37NDW@33090|Viridiplantae,3GFI5@35493|Streptophyta	35493|Streptophyta	S	Pentatricopeptide repeat-containing protein	-	GO:0003674,GO:0003676,GO:0003723,GO:0003824,GO:0004518,GO:0004519,GO:0005488,GO:0005575,GO:0005622,GO:0005623,GO:0005737,GO:0005739,GO:0006139,GO:0006725,GO:0006807,GO:0008150,GO:0008152,GO:0009451,GO:0009987,GO:0016070,GO:0016787,GO:0016788,GO:0034641,GO:0043170,GO:0043226,GO:0043227,GO:0043229,GO:0043231,GO:0043412,GO:0044237,GO:0044238,GO:0044424,GO:0044444,GO:0044464,GO:0046483,GO:0071704,GO:…	-	ko:K17426	-	-	-	-	br01610,ko00000,ko03011	-	-	-	PPR,PPR_1,PPR_2
lcl|ORF7_TRINITY_DN49109_c0_g2_i3_1179_196	3641.EOY17722	7.84e-60	202.0	KOG4197@1|root,KOG4197@2759|Eukaryota,37NDW@33090|Viridiplantae,3GFI5@35493|Streptophyta	35493|Streptophyta	S	Pentatricopeptide repeat-containing protein	-	GO:0003674,GO:0003676,GO:0003723,GO:0003824,GO:0004518,GO:0004519,GO:0005488,GO:0005575,GO:0005622,GO:0005623,GO:0005737,GO:0005739,GO:0006139,GO:0006725,GO:0006807,GO:0008150,GO:0008152,GO:0009451,GO:0009987,GO:0016070,GO:0016787,GO:0016788,GO:0034641,GO:0043170,GO:0043226,GO:0043227,GO:0043229,GO:0043231,GO:0043412,GO:0044237,GO:0044238,GO:0044424,GO:0044444,GO:0044464,GO:0046483,GO:0071704,GO:…	-	ko:K17426	-	-	-	-	br01610,ko00000,ko03011	-	-	-	PPR,PPR_1,PPR_2
lcl|ORF1_TRINITY_DN23889_c0_g1_i1_42_1025	3641.EOY17722	1.1e-59	202.0	KOG4197@1|root,KOG4197@2759|Eukaryota,37NDW@33090|Viridiplantae,3GFI5@35493|Streptophyta	35493|Streptophyta	S	Pentatricopeptide repeat-containing protein	-	GO:0003674,GO:0003676,GO:0003723,GO:0003824,GO:0004518,GO:0004519,GO:0005488,GO:0005575,GO:0005622,GO:0005623,GO:0005737,GO:0005739,GO:0006139,GO:0006725,GO:0006807,GO:0008150,GO:0008152,GO:0009451,GO:0009987,GO:0016070,GO:0016787,GO:0016788,GO:0034641,GO:0043170,GO:0043226,GO:0043227,GO:0043229,GO:0043231,GO:0043412,GO:0044237,GO:0044238,GO:0044424,GO:0044444,GO:0044464,GO:0046483,GO:0071704,GO:…	-	ko:K17426	-	-	-	-	br01610,ko00000,ko03011	-	-	-	PPR,PPR_1,PPR_2
lcl|ORF4_TRINITY_DN12984_c0_g1_i10_1092_346	4432.XP_010247173.1	2.62e-105	311.0	28M72@1|root,2QTQ1@2759|Eukaryota,37S2M@33090|Viridiplantae,3G8D9@35493|Streptophyta	35493|Streptophyta	-	-	-	-	-	-	-	-	-	-	-	-	-	-	-
lcl|ORF5_TRINITY_DN11633_c0_g1_i1_1102_356	4432.XP_010247173.1	1.6e-106	315.0	28M72@1|root,2QTQ1@2759|Eukaryota,37S2M@33090|Viridiplantae,3G8D9@35493|Streptophyta	35493|Streptophyta	-	-	-	-	-	-	-	-	-	-	-	-	-	-	-
lcl|ORF6_TRINITY_DN321_c0_g1_i7_290_1036	4432.XP_010247173.1	3.93e-107	316.0	28M72@1|root,2QTQ1@2759|Eukaryota,37S2M@33090|Viridiplantae,3G8D9@35493|Streptophyta	35493|Streptophyta	-	-	-	-	-	-	-	-	-	-	-	-	-	-	-
XP_028056731.1	4432.XP_010247173.1	7.92e-107	315.0	28M72@1|root,2QTQ1@2759|Eukaryota,37S2M@33090|Viridiplantae,3G8D9@35493|Streptophyta	35493|Streptophyta	-	-	-	-	-	-	-	-	-	-	-	-	-	-	-
lcl|ORF8_TRINITY_DN10014_c0_g1_i2_1247_501	4432.XP_010247173.1	2.26e-106	314.0	28M72@1|root,2QTQ1@2759|Eukaryota,37S2M@33090|Viridiplantae,3G8D9@35493|Streptophyta	35493|Streptophyta	-	-	-	-	-	-	-	-	-	-	-	-	-	-	-
lcl|ORF7_TRINITY_DN3011_c0_g1_i8_1216_470	4432.XP_010247173.1	1.12e-106	315.0	28M72@1|root,2QTQ1@2759|Eukaryota,37S2M@33090|Viridiplantae,3G8D9@35493|Streptophyta	35493|Streptophyta	-	-	-	-	-	-	-	-	-	-	-	-	-	-	-
lcl|ORF3_TRINITY_DN3144_c0_g1_i1_311_1057	4432.XP_010247173.1	2.26e-106	314.0	28M72@1|root,2QTQ1@2759|Eukaryota,37S2M@33090|Viridiplantae,3G8D9@35493|Streptophyta	35493|Streptophyta	-	-	-	-	-	-	-	-	-	-	-	-	-	-	-
lcl|ORF1_TRINITY_DN1814_c0_g1_i7_297_1043	4432.XP_010247173.1	1.95e-107	317.0	28M72@1|root,2QTQ1@2759|Eukaryota,37S2M@33090|Viridiplantae,3G8D9@35493|Streptophyta	35493|Streptophyta	-	-	-	-	-	-	-	-	-	-	-	-	-	-	-
lcl|ORF11_TRINITY_DN11411_c0_g1_i3_1694_483	2711.XP_006482825.1	5.06e-175	501.0	KOG2858@1|root,KOG2858@2759|Eukaryota,37RFU@33090|Viridiplantae,3GH4K@35493|Streptophyta	35493|Streptophyta	S	Box C D snoRNA protein	-	-	-	-	-	-	-	-	-	-	-	-	TIC20,zf-HIT
lcl|ORF2_TRINITY_DN9447_c0_g1_i1_203_748	2711.XP_006482825.1	1.75e-46	164.0	KOG2858@1|root,KOG2858@2759|Eukaryota,37RFU@33090|Viridiplantae,3GH4K@35493|Streptophyta	35493|Streptophyta	S	Box C D snoRNA protein	-	-	-	-	-	-	-	-	-	-	-	-	TIC20,zf-HIT
lcl|ORF10_TRINITY_DN7737_c0_g1_i7_1518_307	2711.XP_006482825.1	1.93e-172	495.0	KOG2858@1|root,KOG2858@2759|Eukaryota,37RFU@33090|Viridiplantae,3GH4K@35493|Streptophyta	35493|Streptophyta	S	Box C D snoRNA protein	-	-	-	-	-	-	-	-	-	-	-	-	TIC20,zf-HIT
XP_028118021.1	2711.XP_006482825.1	5.51e-172	494.0	KOG2858@1|root,KOG2858@2759|Eukaryota,37RFU@33090|Viridiplantae,3GH4K@35493|Streptophyta	35493|Streptophyta	S	Box C D snoRNA protein	-	-	-	-	-	-	-	-	-	-	-	-	TIC20,zf-HIT
lcl|ORF10_TRINITY_DN5630_c0_g1_i1_1779_568	2711.XP_006482825.1	2.74e-172	494.0	KOG2858@1|root,KOG2858@2759|Eukaryota,37RFU@33090|Viridiplantae,3GH4K@35493|Streptophyta	35493|Streptophyta	S	Box C D snoRNA protein	-	-	-	-	-	-	-	-	-	-	-	-	TIC20,zf-HIT
lcl|ORF1_TRINITY_DN18364_c0_g1_i2_96_1307	2711.XP_006482825.1	1.02e-174	501.0	KOG2858@1|root,KOG2858@2759|Eukaryota,37RFU@33090|Viridiplantae,3GH4K@35493|Streptophyta	35493|Streptophyta	S	Box C D snoRNA protein	-	-	-	-	-	-	-	-	-	-	-	-	TIC20,zf-HIT
lcl|ORF1_TRINITY_DN47840_c0_g1_i2_114_1325	2711.XP_006482825.1	7.18e-175	501.0	KOG2858@1|root,KOG2858@2759|Eukaryota,37RFU@33090|Viridiplantae,3GH4K@35493|Streptophyta	35493|Streptophyta	S	Box C D snoRNA protein	-	-	-	-	-	-	-	-	-	-	-	-	TIC20,zf-HIT
lcl|ORF1_TRINITY_DN14484_c0_g1_i1_114_1325	2711.XP_006482825.1	1.02e-174	501.0	KOG2858@1|root,KOG2858@2759|Eukaryota,37RFU@33090|Viridiplantae,3GH4K@35493|Streptophyta	35493|Streptophyta	S	Box C D snoRNA protein	-	-	-	-	-	-	-	-	-	-	-	-	TIC20,zf-HIT
lcl|ORF3_TRINITY_DN17799_c0_g1_i7_1158_1703	71139.XP_010033624.1	3.14e-70	218.0	2AYTV@1|root,2S047@2759|Eukaryota,37UV5@33090|Viridiplantae,3GI02@35493|Streptophyta	35493|Streptophyta	-	-	-	-	-	-	-	-	-	-	-	-	-	-	-
lcl|ORF7_TRINITY_DN2980_c0_g2_i23_1334_1570	71139.XP_010033624.1	1.1e-17	80.1	2AYTV@1|root,2S047@2759|Eukaryota,37UV5@33090|Viridiplantae,3GI02@35493|Streptophyta	35493|Streptophyta	-	-	-	-	-	-	-	-	-	-	-	-	-	-	-
lcl|ORF1_TRINITY_DN10510_c0_g1_i7_423_848	3641.EOY09917	7.66e-25	100.0	2AYTV@1|root,2S047@2759|Eukaryota,37UV5@33090|Viridiplantae,3GI02@35493|Streptophyta	35493|Streptophyta	-	-	-	-	-	-	-	-	-	-	-	-	-	-	-
XP_028064527.1	3641.EOY09917	4.71e-70	217.0	2AYTV@1|root,2S047@2759|Eukaryota,37UV5@33090|Viridiplantae,3GI02@35493|Streptophyta	35493|Streptophyta	-	-	-	-	-	-	-	-	-	-	-	-	-	-	-
lcl|ORF14_TRINITY_DN8690_c0_g2_i1_2417_1899	3641.EOY09917	3.81e-34	125.0	2AYTV@1|root,2S047@2759|Eukaryota,37UV5@33090|Viridiplantae,3GI02@35493|Streptophyta	35493|Streptophyta	-	-	-	-	-	-	-	-	-	-	-	-	-	-	-
lcl|ORF9_TRINITY_DN23519_c0_g1_i8_803_258	3641.EOY09917	4.71e-70	217.0	2AYTV@1|root,2S047@2759|Eukaryota,37UV5@33090|Viridiplantae,3GI02@35493|Streptophyta	35493|Streptophyta	-	-	-	-	-	-	-	-	-	-	-	-	-	-	-
lcl|ORF5_TRINITY_DN8678_c0_g1_i3_500_1045	3641.EOY09917	4.71e-70	217.0	2AYTV@1|root,2S047@2759|Eukaryota,37UV5@33090|Viridiplantae,3GI02@35493|Streptophyta	35493|Streptophyta	-	-	-	-	-	-	-	-	-	-	-	-	-	-	-
lcl|ORF2_TRINITY_DN11884_c0_g1_i4_106_651	3641.EOY09917	1.91e-69	216.0	2AYTV@1|root,2S047@2759|Eukaryota,37UV5@33090|Viridiplantae,3GI02@35493|Streptophyta	35493|Streptophyta	-	-	-	-	-	-	-	-	-	-	-	-	-	-	-
lcl|ORF5_TRINITY_DN39811_c0_g1_i1_937_224	4098.XP_009615891.1	4.92e-113	330.0	KOG3350@1|root,KOG3350@2759|Eukaryota,37K3X@33090|Viridiplantae,3G8BP@35493|Streptophyta,44B6I@71274|asterids	35493|Streptophyta	J	S-adenosyl-L-methionine-dependent protein-lysine N- methyltransferase that methylates elongation factor 1-alpha	-	-	-	-	-	-	-	-	-	-	-	-	N6-adenineMlase
lcl|ORF3_TRINITY_DN22473_c0_g1_i1_29_748	4098.XP_009615891.1	2.27e-114	334.0	KOG3350@1|root,KOG3350@2759|Eukaryota,37K3X@33090|Viridiplantae,3G8BP@35493|Streptophyta,44B6I@71274|asterids	35493|Streptophyta	J	S-adenosyl-L-methionine-dependent protein-lysine N- methyltransferase that methylates elongation factor 1-alpha	-	-	-	-	-	-	-	-	-	-	-	-	N6-adenineMlase
lcl|ORF4_TRINITY_DN14656_c0_g1_i1_901_194	4098.XP_009615891.1	1.67e-115	337.0	KOG3350@1|root,KOG3350@2759|Eukaryota,37K3X@33090|Viridiplantae,3G8BP@35493|Streptophyta,44B6I@71274|asterids	35493|Streptophyta	J	S-adenosyl-L-methionine-dependent protein-lysine N- methyltransferase that methylates elongation factor 1-alpha	-	-	-	-	-	-	-	-	-	-	-	-	N6-adenineMlase
XP_028103118.1	4081.Solyc10g081590.1.1	7.85e-116	337.0	KOG3350@1|root,KOG3350@2759|Eukaryota,37K3X@33090|Viridiplantae,3G8BP@35493|Streptophyta,44B6I@71274|asterids	35493|Streptophyta	J	S-adenosyl-L-methionine-dependent protein-lysine N- methyltransferase that methylates elongation factor 1-alpha	-	-	-	-	-	-	-	-	-	-	-	-	N6-adenineMlase
lcl|ORF2_TRINITY_DN81353_c0_g1_i1_883_170	4098.XP_009615891.1	5.17e-115	335.0	KOG3350@1|root,KOG3350@2759|Eukaryota,37K3X@33090|Viridiplantae,3G8BP@35493|Streptophyta,44B6I@71274|asterids	35493|Streptophyta	J	S-adenosyl-L-methionine-dependent protein-lysine N- methyltransferase that methylates elongation factor 1-alpha	-	-	-	-	-	-	-	-	-	-	-	-	N6-adenineMlase
lcl|ORF4_TRINITY_DN7721_c0_g1_i1_889_158	4098.XP_009615891.1	3.24e-115	336.0	KOG3350@1|root,KOG3350@2759|Eukaryota,37K3X@33090|Viridiplantae,3G8BP@35493|Streptophyta,44B6I@71274|asterids	35493|Streptophyta	J	S-adenosyl-L-methionine-dependent protein-lysine N- methyltransferase that methylates elongation factor 1-alpha	-	-	-	-	-	-	-	-	-	-	-	-	N6-adenineMlase
lcl|ORF4_TRINITY_DN4386_c0_g1_i1_948_193	3988.XP_002531597.1	3.37e-114	334.0	KOG3350@1|root,KOG3350@2759|Eukaryota,37K3X@33090|Viridiplantae,3G8BP@35493|Streptophyta,4JFI2@91835|fabids	35493|Streptophyta	J	S-adenosyl-L-methionine-dependent protein-lysine N- methyltransferase that methylates elongation factor 1-alpha	-	-	-	-	-	-	-	-	-	-	-	-	N6-adenineMlase
lcl|ORF1_TRINITY_DN10388_c0_g1_i1_839_150	4081.Solyc10g081590.1.1	1.52e-115	336.0	KOG3350@1|root,KOG3350@2759|Eukaryota,37K3X@33090|Viridiplantae,3G8BP@35493|Streptophyta,44B6I@71274|asterids	35493|Streptophyta	J	S-adenosyl-L-methionine-dependent protein-lysine N- methyltransferase that methylates elongation factor 1-alpha	-	-	-	-	-	-	-	-	-	-	-	-	N6-adenineMlase
lcl|ORF6_TRINITY_DN4603_c1_g1_i5_1657_617	4096.XP_009794289.1	3.3e-161	468.0	COG0617@1|root,KOG2159@2759|Eukaryota,37S1D@33090|Viridiplantae,3GBE9@35493|Streptophyta,44HKU@71274|asterids	35493|Streptophyta	J	Belongs to the tRNA nucleotidyltransferase poly(A) polymerase family	-	GO:0001680,GO:0003674,GO:0003824,GO:0004652,GO:0004810,GO:0005575,GO:0005622,GO:0005623,GO:0005634,GO:0005737,GO:0005739,GO:0005759,GO:0006139,GO:0006396,GO:0006399,GO:0006725,GO:0006807,GO:0008033,GO:0008150,GO:0008152,GO:0009987,GO:0010467,GO:0016070,GO:0016740,GO:0016772,GO:0016779,GO:0031123,GO:0031974,GO:0034470,GO:0034641,GO:0034660,GO:0042780,GO:0043170,GO:0043226,GO:0043227,GO:0043229,GO:…	2.7.7.72	ko:K00974	ko03013,map03013	-	R09382,R09383,R09384,R09386	RC00078	ko00000,ko00001,ko01000,ko03016	-	-	-	PolyA_pol,PolyA_pol_RNAbd
lcl|ORF1_TRINITY_DN5665_c0_g1_i4_51_1793	29760.VIT_18s0075g00880.t01	2.33e-295	818.0	COG0617@1|root,KOG2159@2759|Eukaryota,37S1D@33090|Viridiplantae,3GBE9@35493|Streptophyta	35493|Streptophyta	J	Belongs to the tRNA nucleotidyltransferase poly(A) polymerase family	-	GO:0001680,GO:0003674,GO:0003824,GO:0004652,GO:0004810,GO:0005575,GO:0005622,GO:0005623,GO:0005634,GO:0005737,GO:0005739,GO:0005759,GO:0006139,GO:0006396,GO:0006399,GO:0006725,GO:0006807,GO:0008033,GO:0008150,GO:0008152,GO:0009987,GO:0010467,GO:0016070,GO:0016740,GO:0016772,GO:0016779,GO:0031123,GO:0031974,GO:0034470,GO:0034641,GO:0034660,GO:0042780,GO:0043170,GO:0043226,GO:0043227,GO:0043229,GO:…	2.7.7.72	ko:K00974	ko03013,map03013	-	R09382,R09383,R09384,R09386	RC00078	ko00000,ko00001,ko01000,ko03016	-	-	-	PolyA_pol,PolyA_pol_RNAbd
lcl|ORF15_TRINITY_DN17908_c0_g1_i15_2343_676	29760.VIT_18s0075g00880.t01	2.38e-272	758.0	COG0617@1|root,KOG2159@2759|Eukaryota,37S1D@33090|Viridiplantae,3GBE9@35493|Streptophyta	35493|Streptophyta	J	Belongs to the tRNA nucleotidyltransferase poly(A) polymerase family	-	GO:0001680,GO:0003674,GO:0003824,GO:0004652,GO:0004810,GO:0005575,GO:0005622,GO:0005623,GO:0005634,GO:0005737,GO:0005739,GO:0005759,GO:0006139,GO:0006396,GO:0006399,GO:0006725,GO:0006807,GO:0008033,GO:0008150,GO:0008152,GO:0009987,GO:0010467,GO:0016070,GO:0016740,GO:0016772,GO:0016779,GO:0031123,GO:0031974,GO:0034470,GO:0034641,GO:0034660,GO:0042780,GO:0043170,GO:0043226,GO:0043227,GO:0043229,GO:…	2.7.7.72	ko:K00974	ko03013,map03013	-	R09382,R09383,R09384,R09386	RC00078	ko00000,ko00001,ko01000,ko03016	-	-	-	PolyA_pol,PolyA_pol_RNAbd
XP_028118841.1	29760.VIT_18s0075g00880.t01	3.96e-278	773.0	COG0617@1|root,KOG2159@2759|Eukaryota,37S1D@33090|Viridiplantae,3GBE9@35493|Streptophyta	35493|Streptophyta	J	Belongs to the tRNA nucleotidyltransferase poly(A) polymerase family	-	GO:0001680,GO:0003674,GO:0003824,GO:0004652,GO:0004810,GO:0005575,GO:0005622,GO:0005623,GO:0005634,GO:0005737,GO:0005739,GO:0005759,GO:0006139,GO:0006396,GO:0006399,GO:0006725,GO:0006807,GO:0008033,GO:0008150,GO:0008152,GO:0009987,GO:0010467,GO:0016070,GO:0016740,GO:0016772,GO:0016779,GO:0031123,GO:0031974,GO:0034470,GO:0034641,GO:0034660,GO:0042780,GO:0043170,GO:0043226,GO:0043227,GO:0043229,GO:…	2.7.7.72	ko:K00974	ko03013,map03013	-	R09382,R09383,R09384,R09386	RC00078	ko00000,ko00001,ko01000,ko03016	-	-	-	PolyA_pol,PolyA_pol_RNAbd
lcl|ORF9_TRINITY_DN3370_c0_g1_i3_1589_549	4096.XP_009794289.1	5.77e-162	470.0	COG0617@1|root,KOG2159@2759|Eukaryota,37S1D@33090|Viridiplantae,3GBE9@35493|Streptophyta,44HKU@71274|asterids	35493|Streptophyta	J	Belongs to the tRNA nucleotidyltransferase poly(A) polymerase family	-	GO:0001680,GO:0003674,GO:0003824,GO:0004652,GO:0004810,GO:0005575,GO:0005622,GO:0005623,GO:0005634,GO:0005737,GO:0005739,GO:0005759,GO:0006139,GO:0006396,GO:0006399,GO:0006725,GO:0006807,GO:0008033,GO:0008150,GO:0008152,GO:0009987,GO:0010467,GO:0016070,GO:0016740,GO:0016772,GO:0016779,GO:0031123,GO:0031974,GO:0034470,GO:0034641,GO:0034660,GO:0042780,GO:0043170,GO:0043226,GO:0043227,GO:0043229,GO:…	2.7.7.72	ko:K00974	ko03013,map03013	-	R09382,R09383,R09384,R09386	RC00078	ko00000,ko00001,ko01000,ko03016	-	-	-	PolyA_pol,PolyA_pol_RNAbd
lcl|ORF8_TRINITY_DN5858_c0_g1_i16_1481_441	4096.XP_009794289.1	4.07e-162	470.0	COG0617@1|root,KOG2159@2759|Eukaryota,37S1D@33090|Viridiplantae,3GBE9@35493|Streptophyta,44HKU@71274|asterids	35493|Streptophyta	J	Belongs to the tRNA nucleotidyltransferase poly(A) polymerase family	-	GO:0001680,GO:0003674,GO:0003824,GO:0004652,GO:0004810,GO:0005575,GO:0005622,GO:0005623,GO:0005634,GO:0005737,GO:0005739,GO:0005759,GO:0006139,GO:0006396,GO:0006399,GO:0006725,GO:0006807,GO:0008033,GO:0008150,GO:0008152,GO:0009987,GO:0010467,GO:0016070,GO:0016740,GO:0016772,GO:0016779,GO:0031123,GO:0031974,GO:0034470,GO:0034641,GO:0034660,GO:0042780,GO:0043170,GO:0043226,GO:0043227,GO:0043229,GO:…	2.7.7.72	ko:K00974	ko03013,map03013	-	R09382,R09383,R09384,R09386	RC00078	ko00000,ko00001,ko01000,ko03016	-	-	-	PolyA_pol,PolyA_pol_RNAbd
lcl|ORF10_TRINITY_DN10369_c0_g1_i3_1538_498	4096.XP_009794289.1	6.63e-161	467.0	COG0617@1|root,KOG2159@2759|Eukaryota,37S1D@33090|Viridiplantae,3GBE9@35493|Streptophyta,44HKU@71274|asterids	35493|Streptophyta	J	Belongs to the tRNA nucleotidyltransferase poly(A) polymerase family	-	GO:0001680,GO:0003674,GO:0003824,GO:0004652,GO:0004810,GO:0005575,GO:0005622,GO:0005623,GO:0005634,GO:0005737,GO:0005739,GO:0005759,GO:0006139,GO:0006396,GO:0006399,GO:0006725,GO:0006807,GO:0008033,GO:0008150,GO:0008152,GO:0009987,GO:0010467,GO:0016070,GO:0016740,GO:0016772,GO:0016779,GO:0031123,GO:0031974,GO:0034470,GO:0034641,GO:0034660,GO:0042780,GO:0043170,GO:0043226,GO:0043227,GO:0043229,GO:…	2.7.7.72	ko:K00974	ko03013,map03013	-	R09382,R09383,R09384,R09386	RC00078	ko00000,ko00001,ko01000,ko03016	-	-	-	PolyA_pol,PolyA_pol_RNAbd
lcl|ORF12_TRINITY_DN8604_c0_g1_i4_1437_502	29760.VIT_18s0075g00880.t01	8.21e-138	407.0	COG0617@1|root,KOG2159@2759|Eukaryota,37S1D@33090|Viridiplantae,3GBE9@35493|Streptophyta	35493|Streptophyta	J	Belongs to the tRNA nucleotidyltransferase poly(A) polymerase family	-	GO:0001680,GO:0003674,GO:0003824,GO:0004652,GO:0004810,GO:0005575,GO:0005622,GO:0005623,GO:0005634,GO:0005737,GO:0005739,GO:0005759,GO:0006139,GO:0006396,GO:0006399,GO:0006725,GO:0006807,GO:0008033,GO:0008150,GO:0008152,GO:0009987,GO:0010467,GO:0016070,GO:0016740,GO:0016772,GO:0016779,GO:0031123,GO:0031974,GO:0034470,GO:0034641,GO:0034660,GO:0042780,GO:0043170,GO:0043226,GO:0043227,GO:0043229,GO:…	2.7.7.72	ko:K00974	ko03013,map03013	-	R09382,R09383,R09384,R09386	RC00078	ko00000,ko00001,ko01000,ko03016	-	-	-	PolyA_pol,PolyA_pol_RNAbd
lcl|ORF23_TRINITY_DN2608_c0_g1_i14_2522_1875	3983.cassava4.1_021838m	7.9e-123	368.0	COG0749@1|root,KOG0950@2759|Eukaryota,37KZP@33090|Viridiplantae,3G7AS@35493|Streptophyta,4JNSM@91835|fabids	35493|Streptophyta	A	DNA polymerase	-	GO:0000018,GO:0000724,GO:0000725,GO:0000726,GO:0002200,GO:0002376,GO:0002377,GO:0002440,GO:0002520,GO:0002566,GO:0003674,GO:0003676,GO:0003677,GO:0003682,GO:0003684,GO:0003824,GO:0003887,GO:0004518,GO:0004527,GO:0005488,GO:0005515,GO:0005575,GO:0005622,GO:0005623,GO:0005634,GO:0005654,GO:0005737,GO:0006139,GO:0006259,GO:0006260,GO:0006261,GO:0006281,GO:0006282,GO:0006284,GO:0006302,GO:0006303,GO:…	2.7.7.7	ko:K02349	-	-	-	-	ko00000,ko01000,ko03400	-	-	-	DEAD,DNA_pol_A,Helicase_C
lcl|ORF20_TRINITY_DN2825_c1_g1_i1_1680_1366	4113.PGSC0003DMT400037575	5.58e-59	185.0	COG0749@1|root,KOG0950@2759|Eukaryota,37KZP@33090|Viridiplantae,3G7AS@35493|Streptophyta,44FT9@71274|asterids	35493|Streptophyta	A	Helicase and polymerase-containing protein	-	GO:0000018,GO:0000724,GO:0000725,GO:0000726,GO:0002200,GO:0002376,GO:0002377,GO:0002440,GO:0002520,GO:0002566,GO:0003674,GO:0003676,GO:0003677,GO:0003682,GO:0003684,GO:0003824,GO:0003887,GO:0004518,GO:0004527,GO:0005488,GO:0005515,GO:0005575,GO:0005622,GO:0005623,GO:0005634,GO:0005654,GO:0005737,GO:0006139,GO:0006259,GO:0006260,GO:0006261,GO:0006281,GO:0006282,GO:0006284,GO:0006302,GO:0006303,GO:…	2.7.7.7	ko:K02349	-	-	-	-	ko00000,ko01000,ko03400	-	-	-	DEAD,DNA_pol_A,Helicase_C
lcl|ORF3_TRINITY_DN20794_c0_g1_i1_528_1	3983.cassava4.1_021838m	1.08e-100	310.0	COG0749@1|root,KOG0950@2759|Eukaryota,37KZP@33090|Viridiplantae,3G7AS@35493|Streptophyta,4JNSM@91835|fabids	35493|Streptophyta	A	DNA polymerase	-	GO:0000018,GO:0000724,GO:0000725,GO:0000726,GO:0002200,GO:0002376,GO:0002377,GO:0002440,GO:0002520,GO:0002566,GO:0003674,GO:0003676,GO:0003677,GO:0003682,GO:0003684,GO:0003824,GO:0003887,GO:0004518,GO:0004527,GO:0005488,GO:0005515,GO:0005575,GO:0005622,GO:0005623,GO:0005634,GO:0005654,GO:0005737,GO:0006139,GO:0006259,GO:0006260,GO:0006261,GO:0006281,GO:0006282,GO:0006284,GO:0006302,GO:0006303,GO:…	2.7.7.7	ko:K02349	-	-	-	-	ko00000,ko01000,ko03400	-	-	-	DEAD,DNA_pol_A,Helicase_C
XP_028104638.1	4113.PGSC0003DMT400037575	1.32e-58	186.0	COG0749@1|root,KOG0950@2759|Eukaryota,37KZP@33090|Viridiplantae,3G7AS@35493|Streptophyta,44FT9@71274|asterids	35493|Streptophyta	A	Helicase and polymerase-containing protein	-	GO:0000018,GO:0000724,GO:0000725,GO:0000726,GO:0002200,GO:0002376,GO:0002377,GO:0002440,GO:0002520,GO:0002566,GO:0003674,GO:0003676,GO:0003677,GO:0003682,GO:0003684,GO:0003824,GO:0003887,GO:0004518,GO:0004527,GO:0005488,GO:0005515,GO:0005575,GO:0005622,GO:0005623,GO:0005634,GO:0005654,GO:0005737,GO:0006139,GO:0006259,GO:0006260,GO:0006261,GO:0006281,GO:0006282,GO:0006284,GO:0006302,GO:0006303,GO:…	2.7.7.7	ko:K02349	-	-	-	-	ko00000,ko01000,ko03400	-	-	-	DEAD,DNA_pol_A,Helicase_C
lcl|ORF2_TRINITY_DN7853_c0_g1_i3_435_749	4113.PGSC0003DMT400037575	1.95e-59	186.0	COG0749@1|root,KOG0950@2759|Eukaryota,37KZP@33090|Viridiplantae,3G7AS@35493|Streptophyta,44FT9@71274|asterids	35493|Streptophyta	A	Helicase and polymerase-containing protein	-	GO:0000018,GO:0000724,GO:0000725,GO:0000726,GO:0002200,GO:0002376,GO:0002377,GO:0002440,GO:0002520,GO:0002566,GO:0003674,GO:0003676,GO:0003677,GO:0003682,GO:0003684,GO:0003824,GO:0003887,GO:0004518,GO:0004527,GO:0005488,GO:0005515,GO:0005575,GO:0005622,GO:0005623,GO:0005634,GO:0005654,GO:0005737,GO:0006139,GO:0006259,GO:0006260,GO:0006261,GO:0006281,GO:0006282,GO:0006284,GO:0006302,GO:0006303,GO:…	2.7.7.7	ko:K02349	-	-	-	-	ko00000,ko01000,ko03400	-	-	-	DEAD,DNA_pol_A,Helicase_C
lcl|ORF15_TRINITY_DN3555_c0_g1_i4_269_583	4113.PGSC0003DMT400037575	1.95e-59	186.0	COG0749@1|root,KOG0950@2759|Eukaryota,37KZP@33090|Viridiplantae,3G7AS@35493|Streptophyta,44FT9@71274|asterids	35493|Streptophyta	A	Helicase and polymerase-containing protein	-	GO:0000018,GO:0000724,GO:0000725,GO:0000726,GO:0002200,GO:0002376,GO:0002377,GO:0002440,GO:0002520,GO:0002566,GO:0003674,GO:0003676,GO:0003677,GO:0003682,GO:0003684,GO:0003824,GO:0003887,GO:0004518,GO:0004527,GO:0005488,GO:0005515,GO:0005575,GO:0005622,GO:0005623,GO:0005634,GO:0005654,GO:0005737,GO:0006139,GO:0006259,GO:0006260,GO:0006261,GO:0006281,GO:0006282,GO:0006284,GO:0006302,GO:0006303,GO:…	2.7.7.7	ko:K02349	-	-	-	-	ko00000,ko01000,ko03400	-	-	-	DEAD,DNA_pol_A,Helicase_C
lcl|ORF13_TRINITY_DN6698_c0_g1_i13_1613_1299	4113.PGSC0003DMT400037575	1.95e-59	186.0	COG0749@1|root,KOG0950@2759|Eukaryota,37KZP@33090|Viridiplantae,3G7AS@35493|Streptophyta,44FT9@71274|asterids	35493|Streptophyta	A	Helicase and polymerase-containing protein	-	GO:0000018,GO:0000724,GO:0000725,GO:0000726,GO:0002200,GO:0002376,GO:0002377,GO:0002440,GO:0002520,GO:0002566,GO:0003674,GO:0003676,GO:0003677,GO:0003682,GO:0003684,GO:0003824,GO:0003887,GO:0004518,GO:0004527,GO:0005488,GO:0005515,GO:0005575,GO:0005622,GO:0005623,GO:0005634,GO:0005654,GO:0005737,GO:0006139,GO:0006259,GO:0006260,GO:0006261,GO:0006281,GO:0006282,GO:0006284,GO:0006302,GO:0006303,GO:…	2.7.7.7	ko:K02349	-	-	-	-	ko00000,ko01000,ko03400	-	-	-	DEAD,DNA_pol_A,Helicase_C
lcl|ORF25_TRINITY_DN4027_c0_g1_i84_2164_1850	4113.PGSC0003DMT400037575	1.95e-59	186.0	COG0749@1|root,KOG0950@2759|Eukaryota,37KZP@33090|Viridiplantae,3G7AS@35493|Streptophyta,44FT9@71274|asterids	35493|Streptophyta	A	Helicase and polymerase-containing protein	-	GO:0000018,GO:0000724,GO:0000725,GO:0000726,GO:0002200,GO:0002376,GO:0002377,GO:0002440,GO:0002520,GO:0002566,GO:0003674,GO:0003676,GO:0003677,GO:0003682,GO:0003684,GO:0003824,GO:0003887,GO:0004518,GO:0004527,GO:0005488,GO:0005515,GO:0005575,GO:0005622,GO:0005623,GO:0005634,GO:0005654,GO:0005737,GO:0006139,GO:0006259,GO:0006260,GO:0006261,GO:0006281,GO:0006282,GO:0006284,GO:0006302,GO:0006303,GO:…	2.7.7.7	ko:K02349	-	-	-	-	ko00000,ko01000,ko03400	-	-	-	DEAD,DNA_pol_A,Helicase_C
lcl|ORF12_TRINITY_DN2658_c0_g2_i1_550_167	29760.VIT_11s0037g00430.t01	6.2e-75	231.0	KOG1947@1|root,KOG1947@2759|Eukaryota,37MPT@33090|Viridiplantae,3GAM6@35493|Streptophyta	35493|Streptophyta	S	F-Box protein	-	GO:0000151,GO:0005575,GO:0005622,GO:0005623,GO:0019005,GO:0031461,GO:0032991,GO:0044424,GO:0044464,GO:1902494,GO:1990234	-	ko:K10268	-	-	-	-	ko00000,ko04121	-	-	-	F-box,F-box-like,LRR_6
lcl|ORF12_TRINITY_DN2679_c0_g1_i1_665_282	29760.VIT_11s0037g00430.t01	6.2e-75	231.0	KOG1947@1|root,KOG1947@2759|Eukaryota,37MPT@33090|Viridiplantae,3GAM6@35493|Streptophyta	35493|Streptophyta	S	F-Box protein	-	GO:0000151,GO:0005575,GO:0005622,GO:0005623,GO:0019005,GO:0031461,GO:0032991,GO:0044424,GO:0044464,GO:1902494,GO:1990234	-	ko:K10268	-	-	-	-	ko00000,ko04121	-	-	-	F-box,F-box-like,LRR_6
lcl|ORF13_TRINITY_DN2278_c0_g1_i2_659_276	29760.VIT_11s0037g00430.t01	6.64e-77	236.0	KOG1947@1|root,KOG1947@2759|Eukaryota,37MPT@33090|Viridiplantae,3GAM6@35493|Streptophyta	35493|Streptophyta	S	F-Box protein	-	GO:0000151,GO:0005575,GO:0005622,GO:0005623,GO:0019005,GO:0031461,GO:0032991,GO:0044424,GO:0044464,GO:1902494,GO:1990234	-	ko:K10268	-	-	-	-	ko00000,ko04121	-	-	-	F-box,F-box-like,LRR_6
XP_028118300.1	29760.VIT_11s0037g00430.t01	1.11e-148	426.0	KOG1947@1|root,KOG1947@2759|Eukaryota,37MPT@33090|Viridiplantae,3GAM6@35493|Streptophyta	35493|Streptophyta	S	F-Box protein	-	GO:0000151,GO:0005575,GO:0005622,GO:0005623,GO:0019005,GO:0031461,GO:0032991,GO:0044424,GO:0044464,GO:1902494,GO:1990234	-	ko:K10268	-	-	-	-	ko00000,ko04121	-	-	-	F-box,F-box-like,LRR_6
lcl|ORF9_TRINITY_DN5472_c0_g1_i1_667_284	29760.VIT_11s0037g00430.t01	6.64e-77	236.0	KOG1947@1|root,KOG1947@2759|Eukaryota,37MPT@33090|Viridiplantae,3GAM6@35493|Streptophyta	35493|Streptophyta	S	F-Box protein	-	GO:0000151,GO:0005575,GO:0005622,GO:0005623,GO:0019005,GO:0031461,GO:0032991,GO:0044424,GO:0044464,GO:1902494,GO:1990234	-	ko:K10268	-	-	-	-	ko00000,ko04121	-	-	-	F-box,F-box-like,LRR_6
lcl|ORF3_TRINITY_DN1409_c0_g1_i1_1217_288	29760.VIT_11s0037g00430.t01	1.36e-149	429.0	KOG1947@1|root,KOG1947@2759|Eukaryota,37MPT@33090|Viridiplantae,3GAM6@35493|Streptophyta	35493|Streptophyta	S	F-Box protein	-	GO:0000151,GO:0005575,GO:0005622,GO:0005623,GO:0019005,GO:0031461,GO:0032991,GO:0044424,GO:0044464,GO:1902494,GO:1990234	-	ko:K10268	-	-	-	-	ko00000,ko04121	-	-	-	F-box,F-box-like,LRR_6
lcl|ORF1_TRINITY_DN1901_c0_g1_i8_33_962	29760.VIT_11s0037g00430.t01	8.25e-151	432.0	KOG1947@1|root,KOG1947@2759|Eukaryota,37MPT@33090|Viridiplantae,3GAM6@35493|Streptophyta	35493|Streptophyta	S	F-Box protein	-	GO:0000151,GO:0005575,GO:0005622,GO:0005623,GO:0019005,GO:0031461,GO:0032991,GO:0044424,GO:0044464,GO:1902494,GO:1990234	-	ko:K10268	-	-	-	-	ko00000,ko04121	-	-	-	F-box,F-box-like,LRR_6
lcl|ORF10_TRINITY_DN2048_c0_g1_i1_770_387	29760.VIT_11s0037g00430.t01	1.89e-76	235.0	KOG1947@1|root,KOG1947@2759|Eukaryota,37MPT@33090|Viridiplantae,3GAM6@35493|Streptophyta	35493|Streptophyta	S	F-Box protein	-	GO:0000151,GO:0005575,GO:0005622,GO:0005623,GO:0019005,GO:0031461,GO:0032991,GO:0044424,GO:0044464,GO:1902494,GO:1990234	-	ko:K10268	-	-	-	-	ko00000,ko04121	-	-	-	F-box,F-box-like,LRR_6
lcl|ORF7_TRINITY_DN2650_c0_g1_i2_682_221	4113.PGSC0003DMT400012206	1.41e-34	125.0	2DZTR@1|root,2S7AI@2759|Eukaryota,37WTE@33090|Viridiplantae,3GK60@35493|Streptophyta,44TS5@71274|asterids	35493|Streptophyta	S	Protease inhibitor seed storage lipid transfer protein family protein	-	-	-	-	-	-	-	-	-	-	-	-	LTP_2
lcl|ORF7_TRINITY_DN5447_c0_g1_i1_708_247	4098.XP_009627049.1	5.67e-34	123.0	2DZTR@1|root,2S7AI@2759|Eukaryota,37WTE@33090|Viridiplantae,3GK60@35493|Streptophyta,44T90@71274|asterids	35493|Streptophyta	S	Plant lipid transfer protein / seed storage protein / trypsin-alpha amylase inhibitor domain family	-	-	-	-	-	-	-	-	-	-	-	-	LTP_2
lcl|ORF1_TRINITY_DN6516_c0_g1_i2_120_581	4113.PGSC0003DMT400012206	1.14e-33	122.0	2DZTR@1|root,2S7AI@2759|Eukaryota,37WTE@33090|Viridiplantae,3GK60@35493|Streptophyta,44TS5@71274|asterids	35493|Streptophyta	S	Protease inhibitor seed storage lipid transfer protein family protein	-	-	-	-	-	-	-	-	-	-	-	-	LTP_2
XP_028123764.1	4113.PGSC0003DMT400012206	3.33e-32	120.0	2DZTR@1|root,2S7AI@2759|Eukaryota,37WTE@33090|Viridiplantae,3GK60@35493|Streptophyta,44TS5@71274|asterids	35493|Streptophyta	S	Protease inhibitor seed storage lipid transfer protein family protein	-	-	-	-	-	-	-	-	-	-	-	-	LTP_2
lcl|ORF7_TRINITY_DN96483_c0_g1_i1_694_233	4113.PGSC0003DMT400012206	8.03e-34	123.0	2DZTR@1|root,2S7AI@2759|Eukaryota,37WTE@33090|Viridiplantae,3GK60@35493|Streptophyta,44TS5@71274|asterids	35493|Streptophyta	S	Protease inhibitor seed storage lipid transfer protein family protein	-	-	-	-	-	-	-	-	-	-	-	-	LTP_2
lcl|ORF5_TRINITY_DN4063_c0_g1_i2_747_238	4098.XP_009627049.1	1.13e-32	120.0	2DZTR@1|root,2S7AI@2759|Eukaryota,37WTE@33090|Viridiplantae,3GK60@35493|Streptophyta,44T90@71274|asterids	35493|Streptophyta	S	Plant lipid transfer protein / seed storage protein / trypsin-alpha amylase inhibitor domain family	-	-	-	-	-	-	-	-	-	-	-	-	LTP_2
lcl|ORF1_TRINITY_DN4496_c0_g1_i4_90_551	4113.PGSC0003DMT400012206	9.93e-35	125.0	2DZTR@1|root,2S7AI@2759|Eukaryota,37WTE@33090|Viridiplantae,3GK60@35493|Streptophyta,44TS5@71274|asterids	35493|Streptophyta	S	Protease inhibitor seed storage lipid transfer protein family protein	-	-	-	-	-	-	-	-	-	-	-	-	LTP_2
lcl|ORF1_TRINITY_DN5656_c0_g1_i1_87_548	4113.PGSC0003DMT400012206	3.49e-35	126.0	2DZTR@1|root,2S7AI@2759|Eukaryota,37WTE@33090|Viridiplantae,3GK60@35493|Streptophyta,44TS5@71274|asterids	35493|Streptophyta	S	Protease inhibitor seed storage lipid transfer protein family protein	-	-	-	-	-	-	-	-	-	-	-	-	LTP_2
lcl|ORF26_TRINITY_DN2623_c0_g1_i3_3005_468	29760.VIT_04s0008g06810.t01	0.0	1295.0	KOG0151@1|root,KOG0151@2759|Eukaryota,37Q4Y@33090|Viridiplantae,3GEQ0@35493|Streptophyta	35493|Streptophyta	A	U2 snRNP-associated SURP motif-containing	-	GO:0005575,GO:0005622,GO:0005623,GO:0005634,GO:0005654,GO:0031974,GO:0031981,GO:0043226,GO:0043227,GO:0043229,GO:0043231,GO:0043233,GO:0044422,GO:0044424,GO:0044428,GO:0044446,GO:0044464,GO:0070013	-	ko:K12842	ko03040,map03040	-	-	-	ko00000,ko00001,ko03041	-	-	-	RRM_1,Surp,cwf21
lcl|ORF18_TRINITY_DN3282_c0_g1_i1_3380_468	29760.VIT_04s0008g06810.t01	0.0	1460.0	KOG0151@1|root,KOG0151@2759|Eukaryota,37Q4Y@33090|Viridiplantae,3GEQ0@35493|Streptophyta	35493|Streptophyta	A	U2 snRNP-associated SURP motif-containing	-	GO:0005575,GO:0005622,GO:0005623,GO:0005634,GO:0005654,GO:0031974,GO:0031981,GO:0043226,GO:0043227,GO:0043229,GO:0043231,GO:0043233,GO:0044422,GO:0044424,GO:0044428,GO:0044446,GO:0044464,GO:0070013	-	ko:K12842	ko03040,map03040	-	-	-	ko00000,ko00001,ko03041	-	-	-	RRM_1,Surp,cwf21
lcl|ORF4_TRINITY_DN681_c4_g1_i3_184_3096	29760.VIT_04s0008g06810.t01	0.0	1459.0	KOG0151@1|root,KOG0151@2759|Eukaryota,37Q4Y@33090|Viridiplantae,3GEQ0@35493|Streptophyta	35493|Streptophyta	A	U2 snRNP-associated SURP motif-containing	-	GO:0005575,GO:0005622,GO:0005623,GO:0005634,GO:0005654,GO:0031974,GO:0031981,GO:0043226,GO:0043227,GO:0043229,GO:0043231,GO:0043233,GO:0044422,GO:0044424,GO:0044428,GO:0044446,GO:0044464,GO:0070013	-	ko:K12842	ko03040,map03040	-	-	-	ko00000,ko00001,ko03041	-	-	-	RRM_1,Surp,cwf21
XP_028052144.1	29760.VIT_04s0008g06810.t01	0.0	1457.0	KOG0151@1|root,KOG0151@2759|Eukaryota,37Q4Y@33090|Viridiplantae,3GEQ0@35493|Streptophyta	35493|Streptophyta	A	U2 snRNP-associated SURP motif-containing	-	GO:0005575,GO:0005622,GO:0005623,GO:0005634,GO:0005654,GO:0031974,GO:0031981,GO:0043226,GO:0043227,GO:0043229,GO:0043231,GO:0043233,GO:0044422,GO:0044424,GO:0044428,GO:0044446,GO:0044464,GO:0070013	-	ko:K12842	ko03040,map03040	-	-	-	ko00000,ko00001,ko03041	-	-	-	RRM_1,Surp,cwf21
lcl|ORF5_TRINITY_DN7818_c1_g1_i1_481_3303	29760.VIT_04s0008g06810.t01	0.0	1355.0	KOG0151@1|root,KOG0151@2759|Eukaryota,37Q4Y@33090|Viridiplantae,3GEQ0@35493|Streptophyta	35493|Streptophyta	A	U2 snRNP-associated SURP motif-containing	-	GO:0005575,GO:0005622,GO:0005623,GO:0005634,GO:0005654,GO:0031974,GO:0031981,GO:0043226,GO:0043227,GO:0043229,GO:0043231,GO:0043233,GO:0044422,GO:0044424,GO:0044428,GO:0044446,GO:0044464,GO:0070013	-	ko:K12842	ko03040,map03040	-	-	-	ko00000,ko00001,ko03041	-	-	-	RRM_1,Surp,cwf21
lcl|ORF18_TRINITY_DN3922_c0_g1_i1_3051_514	29760.VIT_04s0008g06810.t01	0.0	1292.0	KOG0151@1|root,KOG0151@2759|Eukaryota,37Q4Y@33090|Viridiplantae,3GEQ0@35493|Streptophyta	35493|Streptophyta	A	U2 snRNP-associated SURP motif-containing	-	GO:0005575,GO:0005622,GO:0005623,GO:0005634,GO:0005654,GO:0031974,GO:0031981,GO:0043226,GO:0043227,GO:0043229,GO:0043231,GO:0043233,GO:0044422,GO:0044424,GO:0044428,GO:0044446,GO:0044464,GO:0070013	-	ko:K12842	ko03040,map03040	-	-	-	ko00000,ko00001,ko03041	-	-	-	RRM_1,Surp,cwf21
lcl|ORF1_TRINITY_DN6660_c0_g1_i2_165_3077	29760.VIT_04s0008g06810.t01	0.0	1460.0	KOG0151@1|root,KOG0151@2759|Eukaryota,37Q4Y@33090|Viridiplantae,3GEQ0@35493|Streptophyta	35493|Streptophyta	A	U2 snRNP-associated SURP motif-containing	-	GO:0005575,GO:0005622,GO:0005623,GO:0005634,GO:0005654,GO:0031974,GO:0031981,GO:0043226,GO:0043227,GO:0043229,GO:0043231,GO:0043233,GO:0044422,GO:0044424,GO:0044428,GO:0044446,GO:0044464,GO:0070013	-	ko:K12842	ko03040,map03040	-	-	-	ko00000,ko00001,ko03041	-	-	-	RRM_1,Surp,cwf21
lcl|ORF12_TRINITY_DN4171_c0_g1_i2_443_3265	29760.VIT_04s0008g06810.t01	0.0	1351.0	KOG0151@1|root,KOG0151@2759|Eukaryota,37Q4Y@33090|Viridiplantae,3GEQ0@35493|Streptophyta	35493|Streptophyta	A	U2 snRNP-associated SURP motif-containing	-	GO:0005575,GO:0005622,GO:0005623,GO:0005634,GO:0005654,GO:0031974,GO:0031981,GO:0043226,GO:0043227,GO:0043229,GO:0043231,GO:0043233,GO:0044422,GO:0044424,GO:0044428,GO:0044446,GO:0044464,GO:0070013	-	ko:K12842	ko03040,map03040	-	-	-	ko00000,ko00001,ko03041	-	-	-	RRM_1,Surp,cwf21
lcl|ORF5_TRINITY_DN2678_c0_g1_i1_1127_321	29760.VIT_06s0004g07110.t01	1.14e-128	372.0	KOG3160@1|root,KOG3160@2759|Eukaryota,37KZ7@33090|Viridiplantae,3GA7J@35493|Streptophyta	35493|Streptophyta	O	lysosomal thiol	-	-	-	ko:K08059	ko04612,map04612	-	-	-	ko00000,ko00001	-	-	-	GILT
lcl|ORF1_TRINITY_DN2628_c0_g1_i1_114_920	29760.VIT_06s0004g07110.t01	1.14e-128	372.0	KOG3160@1|root,KOG3160@2759|Eukaryota,37KZ7@33090|Viridiplantae,3GA7J@35493|Streptophyta	35493|Streptophyta	O	lysosomal thiol	-	-	-	ko:K08059	ko04612,map04612	-	-	-	ko00000,ko00001	-	-	-	GILT
lcl|ORF7_TRINITY_DN3430_c0_g1_i1_1128_322	29760.VIT_06s0004g07110.t01	1.14e-128	372.0	KOG3160@1|root,KOG3160@2759|Eukaryota,37KZ7@33090|Viridiplantae,3GA7J@35493|Streptophyta	35493|Streptophyta	O	lysosomal thiol	-	-	-	ko:K08059	ko04612,map04612	-	-	-	ko00000,ko00001	-	-	-	GILT
XP_028112366.1	29760.VIT_06s0004g07110.t01	8.32e-117	342.0	KOG3160@1|root,KOG3160@2759|Eukaryota,37KZ7@33090|Viridiplantae,3GA7J@35493|Streptophyta	35493|Streptophyta	O	lysosomal thiol	-	-	-	ko:K08059	ko04612,map04612	-	-	-	ko00000,ko00001	-	-	-	GILT
lcl|ORF1_TRINITY_DN2366_c0_g1_i1_187_993	29760.VIT_06s0004g07110.t01	2.29e-128	371.0	KOG3160@1|root,KOG3160@2759|Eukaryota,37KZ7@33090|Viridiplantae,3GA7J@35493|Streptophyta	35493|Streptophyta	O	lysosomal thiol	-	-	-	ko:K08059	ko04612,map04612	-	-	-	ko00000,ko00001	-	-	-	GILT
lcl|ORF6_TRINITY_DN2867_c0_g1_i6_1128_322	29760.VIT_06s0004g07110.t01	6.55e-128	370.0	KOG3160@1|root,KOG3160@2759|Eukaryota,37KZ7@33090|Viridiplantae,3GA7J@35493|Streptophyta	35493|Streptophyta	O	lysosomal thiol	-	-	-	ko:K08059	ko04612,map04612	-	-	-	ko00000,ko00001	-	-	-	GILT
lcl|ORF5_TRINITY_DN2190_c0_g1_i4_1120_314	29760.VIT_06s0004g07110.t01	4.61e-128	370.0	KOG3160@1|root,KOG3160@2759|Eukaryota,37KZ7@33090|Viridiplantae,3GA7J@35493|Streptophyta	35493|Streptophyta	O	lysosomal thiol	-	-	-	ko:K08059	ko04612,map04612	-	-	-	ko00000,ko00001	-	-	-	GILT
lcl|ORF7_TRINITY_DN2840_c0_g1_i1_1130_324	29760.VIT_06s0004g07110.t01	9.29e-128	370.0	KOG3160@1|root,KOG3160@2759|Eukaryota,37KZ7@33090|Viridiplantae,3GA7J@35493|Streptophyta	35493|Streptophyta	O	lysosomal thiol	-	-	-	ko:K08059	ko04612,map04612	-	-	-	ko00000,ko00001	-	-	-	GILT
lcl|ORF1_TRINITY_DN19797_c0_g1_i1_330_524	29760.VIT_04s0023g03290.t01	4.09e-32	115.0	2BWZY@1|root,2S2EA@2759|Eukaryota,37VED@33090|Viridiplantae,3GJQN@35493|Streptophyta	35493|Streptophyta	-	-	-	-	-	-	-	-	-	-	-	-	-	-	DUF2839
lcl|ORF1_TRINITY_DN36719_c0_g1_i1_11_505	4432.XP_010244099.1	3.32e-43	148.0	2BWZY@1|root,2S2EA@2759|Eukaryota,37VED@33090|Viridiplantae,3GJQN@35493|Streptophyta	35493|Streptophyta	-	-	-	-	-	-	-	-	-	-	-	-	-	-	DUF2839
lcl|ORF6_TRINITY_DN96077_c0_g1_i1_801_289	4432.XP_010244099.1	4.13e-43	148.0	2BWZY@1|root,2S2EA@2759|Eukaryota,37VED@33090|Viridiplantae,3GJQN@35493|Streptophyta	35493|Streptophyta	-	-	-	-	-	-	-	-	-	-	-	-	-	-	DUF2839
XP_028094442.1	4432.XP_010244099.1	4.28e-43	148.0	2BWZY@1|root,2S2EA@2759|Eukaryota,37VED@33090|Viridiplantae,3GJQN@35493|Streptophyta	35493|Streptophyta	-	-	-	-	-	-	-	-	-	-	-	-	-	-	DUF2839
lcl|ORF1_TRINITY_DN17032_c0_g1_i1_39_554	3694.POPTR_0005s11710.1	9.53e-44	150.0	2BWZY@1|root,2S2EA@2759|Eukaryota,37VED@33090|Viridiplantae,3GJQN@35493|Streptophyta,4JQ47@91835|fabids	35493|Streptophyta	-	-	-	-	-	-	-	-	-	-	-	-	-	-	DUF2839
lcl|ORF2_TRINITY_DN111235_c0_g1_i1_195_1	29760.VIT_04s0023g03290.t01	4.69e-31	113.0	2BWZY@1|root,2S2EA@2759|Eukaryota,37VED@33090|Viridiplantae,3GJQN@35493|Streptophyta	35493|Streptophyta	-	-	-	-	-	-	-	-	-	-	-	-	-	-	DUF2839
lcl|ORF5_TRINITY_DN4007_c0_g1_i2_804_289	4432.XP_010244099.1	4.28e-43	148.0	2BWZY@1|root,2S2EA@2759|Eukaryota,37VED@33090|Viridiplantae,3GJQN@35493|Streptophyta	35493|Streptophyta	-	-	-	-	-	-	-	-	-	-	-	-	-	-	DUF2839
lcl|ORF3_TRINITY_DN29141_c0_g1_i2_476_808	29760.VIT_04s0023g03290.t01	7.04e-34	122.0	2BWZY@1|root,2S2EA@2759|Eukaryota,37VED@33090|Viridiplantae,3GJQN@35493|Streptophyta	35493|Streptophyta	-	-	-	-	-	-	-	-	-	-	-	-	-	-	DUF2839
lcl|ORF13_TRINITY_DN26519_c0_g1_i5_3832_311	29760.VIT_17s0000g08510.t01	8.3e-215	660.0	KOG0892@1|root,KOG0892@2759|Eukaryota,37TG9@33090|Viridiplantae,3GEQK@35493|Streptophyta	35493|Streptophyta	BDLT	Serine threonine-protein kinase ATM-like	-	-	-	-	-	-	-	-	-	-	-	-	PWWP
lcl|ORF18_TRINITY_DN8417_c0_g1_i1_3736_215	29760.VIT_17s0000g08510.t01	2.13e-215	662.0	KOG0892@1|root,KOG0892@2759|Eukaryota,37TG9@33090|Viridiplantae,3GEQK@35493|Streptophyta	35493|Streptophyta	BDLT	Serine threonine-protein kinase ATM-like	-	-	-	-	-	-	-	-	-	-	-	-	PWWP
lcl|ORF9_TRINITY_DN1886_c0_g1_i7_251_3772	29760.VIT_17s0000g08510.t01	1.61e-210	649.0	KOG0892@1|root,KOG0892@2759|Eukaryota,37TG9@33090|Viridiplantae,3GEQK@35493|Streptophyta	35493|Streptophyta	BDLT	Serine threonine-protein kinase ATM-like	-	-	-	-	-	-	-	-	-	-	-	-	PWWP
XP_028104187.1	29760.VIT_17s0000g08510.t01	6.37e-216	662.0	KOG0892@1|root,KOG0892@2759|Eukaryota,37TG9@33090|Viridiplantae,3GEQK@35493|Streptophyta	35493|Streptophyta	BDLT	Serine threonine-protein kinase ATM-like	-	-	-	-	-	-	-	-	-	-	-	-	PWWP
lcl|ORF9_TRINITY_DN14058_c3_g1_i1_230_3727	29760.VIT_17s0000g08510.t01	7.76e-213	655.0	KOG0892@1|root,KOG0892@2759|Eukaryota,37TG9@33090|Viridiplantae,3GEQK@35493|Streptophyta	35493|Streptophyta	BDLT	Serine threonine-protein kinase ATM-like	-	-	-	-	-	-	-	-	-	-	-	-	PWWP
lcl|ORF2_TRINITY_DN8056_c1_g1_i1_199_3696	29760.VIT_17s0000g08510.t01	9.11e-211	649.0	KOG0892@1|root,KOG0892@2759|Eukaryota,37TG9@33090|Viridiplantae,3GEQK@35493|Streptophyta	35493|Streptophyta	BDLT	Serine threonine-protein kinase ATM-like	-	-	-	-	-	-	-	-	-	-	-	-	PWWP
lcl|ORF21_TRINITY_DN4827_c2_g1_i10_3768_274	29760.VIT_17s0000g08510.t01	8.85e-211	649.0	KOG0892@1|root,KOG0892@2759|Eukaryota,37TG9@33090|Viridiplantae,3GEQK@35493|Streptophyta	35493|Streptophyta	BDLT	Serine threonine-protein kinase ATM-like	-	-	-	-	-	-	-	-	-	-	-	-	PWWP
lcl|ORF17_TRINITY_DN15619_c1_g1_i1_3712_215	29760.VIT_17s0000g08510.t01	1.18e-211	652.0	KOG0892@1|root,KOG0892@2759|Eukaryota,37TG9@33090|Viridiplantae,3GEQK@35493|Streptophyta	35493|Streptophyta	BDLT	Serine threonine-protein kinase ATM-like	-	-	-	-	-	-	-	-	-	-	-	-	PWWP
lcl|ORF4_TRINITY_DN30665_c0_g1_i1_5_1504	4098.XP_009628962.1	2.93e-186	546.0	28Q85@1|root,2QWWX@2759|Eukaryota,37N9N@33090|Viridiplantae,3GH2S@35493|Streptophyta,44INH@71274|asterids	35493|Streptophyta	S	Conserved gene of	-	-	-	-	-	-	-	-	-	-	-	-	-
lcl|ORF8_TRINITY_DN16166_c0_g2_i1_866_0	3988.XP_002528938.1	2.16e-116	358.0	28Q85@1|root,2QWWX@2759|Eukaryota,37N9N@33090|Viridiplantae,3GH2S@35493|Streptophyta,4JGB8@91835|fabids	35493|Streptophyta	-	-	-	-	-	-	-	-	-	-	-	-	-	-	-
lcl|ORF5_TRINITY_DN39681_c0_g1_i1_104_2371	3983.cassava4.1_002277m	1.93e-311	875.0	28Q85@1|root,2QWWX@2759|Eukaryota,37N9N@33090|Viridiplantae,3GH2S@35493|Streptophyta,4JGB8@91835|fabids	35493|Streptophyta	-	-	-	-	-	-	-	-	-	-	-	-	-	-	-
XP_028093143.1	4098.XP_009628962.1	2.47e-130	398.0	28Q85@1|root,2QWWX@2759|Eukaryota,37N9N@33090|Viridiplantae,3GH2S@35493|Streptophyta,44INH@71274|asterids	35493|Streptophyta	S	Conserved gene of	-	-	-	-	-	-	-	-	-	-	-	-	-
lcl|ORF14_TRINITY_DN31258_c0_g1_i2_2624_357	3983.cassava4.1_002277m	2.53e-314	882.0	28Q85@1|root,2QWWX@2759|Eukaryota,37N9N@33090|Viridiplantae,3GH2S@35493|Streptophyta,4JGB8@91835|fabids	35493|Streptophyta	-	-	-	-	-	-	-	-	-	-	-	-	-	-	-
lcl|ORF16_TRINITY_DN32856_c0_g1_i1_2295_28	3988.XP_002528938.1	2.53e-313	880.0	28Q85@1|root,2QWWX@2759|Eukaryota,37N9N@33090|Viridiplantae,3GH2S@35493|Streptophyta,4JGB8@91835|fabids	35493|Streptophyta	-	-	-	-	-	-	-	-	-	-	-	-	-	-	-
lcl|ORF13_TRINITY_DN18422_c0_g1_i3_2425_158	3988.XP_002528938.1	2.53e-313	880.0	28Q85@1|root,2QWWX@2759|Eukaryota,37N9N@33090|Viridiplantae,3GH2S@35493|Streptophyta,4JGB8@91835|fabids	35493|Streptophyta	-	-	-	-	-	-	-	-	-	-	-	-	-	-	-
lcl|ORF5_TRINITY_DN13179_c0_g1_i2_68_2335	3983.cassava4.1_002277m	4.14e-313	879.0	28Q85@1|root,2QWWX@2759|Eukaryota,37N9N@33090|Viridiplantae,3GH2S@35493|Streptophyta,4JGB8@91835|fabids	35493|Streptophyta	-	-	-	-	-	-	-	-	-	-	-	-	-	-	-
lcl|ORF11_TRINITY_DN3657_c0_g1_i1_1952_543	29760.VIT_13s0019g04410.t01	1.17e-281	776.0	KOG2291@1|root,KOG2291@2759|Eukaryota,37HDY@33090|Viridiplantae,3GA2K@35493|Streptophyta	35493|Streptophyta	O	Essential subunit of the N-oligosaccharyl transferase (OST) complex which catalyzes the transfer of a high mannose oligosaccharide from a lipid-linked oligosaccharide donor to an asparagine residue within an Asn-X-Ser Thr consensus motif in nascent polypeptide chains	-	GO:0003674,GO:0003824,GO:0004576,GO:0004579,GO:0005575,GO:0005618,GO:0005622,GO:0005623,GO:0005737,GO:0005773,GO:0005774,GO:0005783,GO:0005789,GO:0005886,GO:0006464,GO:0006486,GO:0006487,GO:0006807,GO:0008150,GO:0008152,GO:0008250,GO:0009058,GO:0009059,GO:0009100,GO:0009101,GO:0009505,GO:0009987,GO:0012505,GO:0016020,GO:0016740,GO:0016757,GO:0016758,GO:0018193,GO:0018196,GO:0018279,GO:0019538,GO:…	-	ko:K12666	ko00510,ko00513,ko01100,ko04141,map00510,map00513,map01100,map04141	M00072	-	-	ko00000,ko00001,ko00002	-	-	-	Ribophorin_I
lcl|ORF3_TRINITY_DN21406_c0_g1_i1_14_1423	29760.VIT_13s0019g04410.t01	5.78e-282	777.0	KOG2291@1|root,KOG2291@2759|Eukaryota,37HDY@33090|Viridiplantae,3GA2K@35493|Streptophyta	35493|Streptophyta	O	Essential subunit of the N-oligosaccharyl transferase (OST) complex which catalyzes the transfer of a high mannose oligosaccharide from a lipid-linked oligosaccharide donor to an asparagine residue within an Asn-X-Ser Thr consensus motif in nascent polypeptide chains	-	GO:0003674,GO:0003824,GO:0004576,GO:0004579,GO:0005575,GO:0005618,GO:0005622,GO:0005623,GO:0005737,GO:0005773,GO:0005774,GO:0005783,GO:0005789,GO:0005886,GO:0006464,GO:0006486,GO:0006487,GO:0006807,GO:0008150,GO:0008152,GO:0008250,GO:0009058,GO:0009059,GO:0009100,GO:0009101,GO:0009505,GO:0009987,GO:0012505,GO:0016020,GO:0016740,GO:0016757,GO:0016758,GO:0018193,GO:0018196,GO:0018279,GO:0019538,GO:…	-	ko:K12666	ko00510,ko00513,ko01100,ko04141,map00510,map00513,map01100,map04141	M00072	-	-	ko00000,ko00001,ko00002	-	-	-	Ribophorin_I
lcl|ORF14_TRINITY_DN2579_c0_g1_i1_1977_406	29760.VIT_13s0019g04410.t01	3.75e-278	769.0	KOG2291@1|root,KOG2291@2759|Eukaryota,37HDY@33090|Viridiplantae,3GA2K@35493|Streptophyta	35493|Streptophyta	O	Essential subunit of the N-oligosaccharyl transferase (OST) complex which catalyzes the transfer of a high mannose oligosaccharide from a lipid-linked oligosaccharide donor to an asparagine residue within an Asn-X-Ser Thr consensus motif in nascent polypeptide chains	-	GO:0003674,GO:0003824,GO:0004576,GO:0004579,GO:0005575,GO:0005618,GO:0005622,GO:0005623,GO:0005737,GO:0005773,GO:0005774,GO:0005783,GO:0005789,GO:0005886,GO:0006464,GO:0006486,GO:0006487,GO:0006807,GO:0008150,GO:0008152,GO:0008250,GO:0009058,GO:0009059,GO:0009100,GO:0009101,GO:0009505,GO:0009987,GO:0012505,GO:0016020,GO:0016740,GO:0016757,GO:0016758,GO:0018193,GO:0018196,GO:0018279,GO:0019538,GO:…	-	ko:K12666	ko00510,ko00513,ko01100,ko04141,map00510,map00513,map01100,map04141	M00072	-	-	ko00000,ko00001,ko00002	-	-	-	Ribophorin_I
XP_028109477.1	29760.VIT_13s0019g04410.t01	7.01e-281	774.0	KOG2291@1|root,KOG2291@2759|Eukaryota,37HDY@33090|Viridiplantae,3GA2K@35493|Streptophyta	35493|Streptophyta	O	Essential subunit of the N-oligosaccharyl transferase (OST) complex which catalyzes the transfer of a high mannose oligosaccharide from a lipid-linked oligosaccharide donor to an asparagine residue within an Asn-X-Ser Thr consensus motif in nascent polypeptide chains	-	GO:0003674,GO:0003824,GO:0004576,GO:0004579,GO:0005575,GO:0005618,GO:0005622,GO:0005623,GO:0005737,GO:0005773,GO:0005774,GO:0005783,GO:0005789,GO:0005886,GO:0006464,GO:0006486,GO:0006487,GO:0006807,GO:0008150,GO:0008152,GO:0008250,GO:0009058,GO:0009059,GO:0009100,GO:0009101,GO:0009505,GO:0009987,GO:0012505,GO:0016020,GO:0016740,GO:0016757,GO:0016758,GO:0018193,GO:0018196,GO:0018279,GO:0019538,GO:…	-	ko:K12666	ko00510,ko00513,ko01100,ko04141,map00510,map00513,map01100,map04141	M00072	-	-	ko00000,ko00001,ko00002	-	-	-	Ribophorin_I
lcl|ORF1_TRINITY_DN124040_c0_g1_i1_30_1439	29760.VIT_13s0019g04410.t01	1.17e-281	776.0	KOG2291@1|root,KOG2291@2759|Eukaryota,37HDY@33090|Viridiplantae,3GA2K@35493|Streptophyta	35493|Streptophyta	O	Essential subunit of the N-oligosaccharyl transferase (OST) complex which catalyzes the transfer of a high mannose oligosaccharide from a lipid-linked oligosaccharide donor to an asparagine residue within an Asn-X-Ser Thr consensus motif in nascent polypeptide chains	-	GO:0003674,GO:0003824,GO:0004576,GO:0004579,GO:0005575,GO:0005618,GO:0005622,GO:0005623,GO:0005737,GO:0005773,GO:0005774,GO:0005783,GO:0005789,GO:0005886,GO:0006464,GO:0006486,GO:0006487,GO:0006807,GO:0008150,GO:0008152,GO:0008250,GO:0009058,GO:0009059,GO:0009100,GO:0009101,GO:0009505,GO:0009987,GO:0012505,GO:0016020,GO:0016740,GO:0016757,GO:0016758,GO:0018193,GO:0018196,GO:0018279,GO:0019538,GO:…	-	ko:K12666	ko00510,ko00513,ko01100,ko04141,map00510,map00513,map01100,map04141	M00072	-	-	ko00000,ko00001,ko00002	-	-	-	Ribophorin_I
lcl|ORF1_TRINITY_DN14785_c0_g1_i2_199_1608	29760.VIT_13s0019g04410.t01	2.74e-280	773.0	KOG2291@1|root,KOG2291@2759|Eukaryota,37HDY@33090|Viridiplantae,3GA2K@35493|Streptophyta	35493|Streptophyta	O	Essential subunit of the N-oligosaccharyl transferase (OST) complex which catalyzes the transfer of a high mannose oligosaccharide from a lipid-linked oligosaccharide donor to an asparagine residue within an Asn-X-Ser Thr consensus motif in nascent polypeptide chains	-	GO:0003674,GO:0003824,GO:0004576,GO:0004579,GO:0005575,GO:0005618,GO:0005622,GO:0005623,GO:0005737,GO:0005773,GO:0005774,GO:0005783,GO:0005789,GO:0005886,GO:0006464,GO:0006486,GO:0006487,GO:0006807,GO:0008150,GO:0008152,GO:0008250,GO:0009058,GO:0009059,GO:0009100,GO:0009101,GO:0009505,GO:0009987,GO:0012505,GO:0016020,GO:0016740,GO:0016757,GO:0016758,GO:0018193,GO:0018196,GO:0018279,GO:0019538,GO:…	-	ko:K12666	ko00510,ko00513,ko01100,ko04141,map00510,map00513,map01100,map04141	M00072	-	-	ko00000,ko00001,ko00002	-	-	-	Ribophorin_I
lcl|ORF1_TRINITY_DN3584_c0_g1_i1_15_1424	29760.VIT_13s0019g04410.t01	3.34e-281	775.0	KOG2291@1|root,KOG2291@2759|Eukaryota,37HDY@33090|Viridiplantae,3GA2K@35493|Streptophyta	35493|Streptophyta	O	Essential subunit of the N-oligosaccharyl transferase (OST) complex which catalyzes the transfer of a high mannose oligosaccharide from a lipid-linked oligosaccharide donor to an asparagine residue within an Asn-X-Ser Thr consensus motif in nascent polypeptide chains	-	GO:0003674,GO:0003824,GO:0004576,GO:0004579,GO:0005575,GO:0005618,GO:0005622,GO:0005623,GO:0005737,GO:0005773,GO:0005774,GO:0005783,GO:0005789,GO:0005886,GO:0006464,GO:0006486,GO:0006487,GO:0006807,GO:0008150,GO:0008152,GO:0008250,GO:0009058,GO:0009059,GO:0009100,GO:0009101,GO:0009505,GO:0009987,GO:0012505,GO:0016020,GO:0016740,GO:0016757,GO:0016758,GO:0018193,GO:0018196,GO:0018279,GO:0019538,GO:…	-	ko:K12666	ko00510,ko00513,ko01100,ko04141,map00510,map00513,map01100,map04141	M00072	-	-	ko00000,ko00001,ko00002	-	-	-	Ribophorin_I
lcl|ORF13_TRINITY_DN10062_c0_g2_i1_1882_473	29760.VIT_13s0019g04410.t01	3.19e-279	770.0	KOG2291@1|root,KOG2291@2759|Eukaryota,37HDY@33090|Viridiplantae,3GA2K@35493|Streptophyta	35493|Streptophyta	O	Essential subunit of the N-oligosaccharyl transferase (OST) complex which catalyzes the transfer of a high mannose oligosaccharide from a lipid-linked oligosaccharide donor to an asparagine residue within an Asn-X-Ser Thr consensus motif in nascent polypeptide chains	-	GO:0003674,GO:0003824,GO:0004576,GO:0004579,GO:0005575,GO:0005618,GO:0005622,GO:0005623,GO:0005737,GO:0005773,GO:0005774,GO:0005783,GO:0005789,GO:0005886,GO:0006464,GO:0006486,GO:0006487,GO:0006807,GO:0008150,GO:0008152,GO:0008250,GO:0009058,GO:0009059,GO:0009100,GO:0009101,GO:0009505,GO:0009987,GO:0012505,GO:0016020,GO:0016740,GO:0016757,GO:0016758,GO:0018193,GO:0018196,GO:0018279,GO:0019538,GO:…	-	ko:K12666	ko00510,ko00513,ko01100,ko04141,map00510,map00513,map01100,map04141	M00072	-	-	ko00000,ko00001,ko00002	-	-	-	Ribophorin_I
lcl|ORF8_TRINITY_DN3695_c1_g1_i8_98_1855	2711.XP_006472672.1	9.53e-206	604.0	28JT7@1|root,2QS72@2759|Eukaryota,37Q8Q@33090|Viridiplantae,3GBTA@35493|Streptophyta	35493|Streptophyta	S	Domain found in Dishevelled, Egl-10, and Pleckstrin (DEP)	-	-	-	-	-	-	-	-	-	-	-	-	DEP,DUF547,Glutaredoxin
lcl|ORF2_TRINITY_DN7486_c0_g2_i2_100_1854	2711.XP_006472672.1	3.41e-200	590.0	28JT7@1|root,2QS72@2759|Eukaryota,37Q8Q@33090|Viridiplantae,3GBTA@35493|Streptophyta	35493|Streptophyta	S	Domain found in Dishevelled, Egl-10, and Pleckstrin (DEP)	-	-	-	-	-	-	-	-	-	-	-	-	DEP,DUF547,Glutaredoxin
lcl|ORF9_TRINITY_DN3344_c0_g1_i10_401_2608	71139.XP_010064017.1	2.14e-304	858.0	28JT7@1|root,2QS72@2759|Eukaryota,37Q8Q@33090|Viridiplantae,3GBTA@35493|Streptophyta	35493|Streptophyta	S	Domain found in Dishevelled, Egl-10, and Pleckstrin (DEP)	-	-	-	-	-	-	-	-	-	-	-	-	DEP,DUF547,Glutaredoxin
XP_028120954.1	71139.XP_010064017.1	0.0	937.0	28JT7@1|root,2QS72@2759|Eukaryota,37Q8Q@33090|Viridiplantae,3GBTA@35493|Streptophyta	35493|Streptophyta	S	Domain found in Dishevelled, Egl-10, and Pleckstrin (DEP)	-	-	-	-	-	-	-	-	-	-	-	-	DEP,DUF547,Glutaredoxin
lcl|ORF1_TRINITY_DN43697_c0_g1_i3_312_2669	71139.XP_010064017.1	0.0	941.0	28JT7@1|root,2QS72@2759|Eukaryota,37Q8Q@33090|Viridiplantae,3GBTA@35493|Streptophyta	35493|Streptophyta	S	Domain found in Dishevelled, Egl-10, and Pleckstrin (DEP)	-	-	-	-	-	-	-	-	-	-	-	-	DEP,DUF547,Glutaredoxin
lcl|ORF13_TRINITY_DN7646_c0_g1_i2_3357_1135	71139.XP_010064017.1	7.35e-304	857.0	28JT7@1|root,2QS72@2759|Eukaryota,37Q8Q@33090|Viridiplantae,3GBTA@35493|Streptophyta	35493|Streptophyta	S	Domain found in Dishevelled, Egl-10, and Pleckstrin (DEP)	-	-	-	-	-	-	-	-	-	-	-	-	DEP,DUF547,Glutaredoxin
lcl|ORF7_TRINITY_DN10652_c0_g1_i8_371_2743	71139.XP_010064017.1	0.0	932.0	28JT7@1|root,2QS72@2759|Eukaryota,37Q8Q@33090|Viridiplantae,3GBTA@35493|Streptophyta	35493|Streptophyta	S	Domain found in Dishevelled, Egl-10, and Pleckstrin (DEP)	-	-	-	-	-	-	-	-	-	-	-	-	DEP,DUF547,Glutaredoxin
lcl|ORF6_TRINITY_DN24919_c0_g1_i1_1241_0	2711.XP_006472672.1	1.81e-152	461.0	28JT7@1|root,2QS72@2759|Eukaryota,37Q8Q@33090|Viridiplantae,3GBTA@35493|Streptophyta	35493|Streptophyta	S	Domain found in Dishevelled, Egl-10, and Pleckstrin (DEP)	-	-	-	-	-	-	-	-	-	-	-	-	DEP,DUF547,Glutaredoxin
lcl|ORF10_TRINITY_DN9823_c0_g1_i4_2109_100	29760.VIT_17s0000g09170.t01	0.0	948.0	COG0515@1|root,2QR0Z@2759|Eukaryota,37QZE@33090|Viridiplantae,3GFIA@35493|Streptophyta	35493|Streptophyta	T	L-type lectin-domain containing receptor kinase	-	GO:0002229,GO:0002239,GO:0005575,GO:0005622,GO:0005623,GO:0005737,GO:0005773,GO:0005886,GO:0006950,GO:0006952,GO:0008150,GO:0009605,GO:0009607,GO:0009617,GO:0016020,GO:0042742,GO:0043207,GO:0043226,GO:0043227,GO:0043229,GO:0043231,GO:0044424,GO:0044444,GO:0044464,GO:0050896,GO:0051704,GO:0051707,GO:0071944,GO:0098542	-	-	-	-	-	-	-	-	-	-	Lectin_legB,Pkinase
lcl|ORF7_TRINITY_DN25815_c0_g1_i1_143_2134	29760.VIT_17s0000g09170.t01	0.0	954.0	COG0515@1|root,2QR0Z@2759|Eukaryota,37QZE@33090|Viridiplantae,3GFIA@35493|Streptophyta	35493|Streptophyta	T	L-type lectin-domain containing receptor kinase	-	GO:0002229,GO:0002239,GO:0005575,GO:0005622,GO:0005623,GO:0005737,GO:0005773,GO:0005886,GO:0006950,GO:0006952,GO:0008150,GO:0009605,GO:0009607,GO:0009617,GO:0016020,GO:0042742,GO:0043207,GO:0043226,GO:0043227,GO:0043229,GO:0043231,GO:0044424,GO:0044444,GO:0044464,GO:0050896,GO:0051704,GO:0051707,GO:0071944,GO:0098542	-	-	-	-	-	-	-	-	-	-	Lectin_legB,Pkinase
lcl|ORF8_TRINITY_DN11061_c0_g1_i1_1570_2	4432.XP_010251066.1	7.86e-275	769.0	COG0515@1|root,2QR0Z@2759|Eukaryota,37QZE@33090|Viridiplantae,3GFIA@35493|Streptophyta	35493|Streptophyta	T	L-type lectin-domain containing receptor kinase	-	-	-	-	-	-	-	-	-	-	-	-	Lectin_legB,Pkinase
XP_028100495.1	29760.VIT_17s0000g09170.t01	0.0	952.0	COG0515@1|root,2QR0Z@2759|Eukaryota,37QZE@33090|Viridiplantae,3GFIA@35493|Streptophyta	35493|Streptophyta	T	L-type lectin-domain containing receptor kinase	-	GO:0002229,GO:0002239,GO:0005575,GO:0005622,GO:0005623,GO:0005737,GO:0005773,GO:0005886,GO:0006950,GO:0006952,GO:0008150,GO:0009605,GO:0009607,GO:0009617,GO:0016020,GO:0042742,GO:0043207,GO:0043226,GO:0043227,GO:0043229,GO:0043231,GO:0044424,GO:0044444,GO:0044464,GO:0050896,GO:0051704,GO:0051707,GO:0071944,GO:0098542	-	-	-	-	-	-	-	-	-	-	Lectin_legB,Pkinase
lcl|ORF1_TRINITY_DN9877_c0_g1_i1_82_1521	29760.VIT_17s0000g09170.t01	2.38e-265	743.0	COG0515@1|root,2QR0Z@2759|Eukaryota,37QZE@33090|Viridiplantae,3GFIA@35493|Streptophyta	35493|Streptophyta	T	L-type lectin-domain containing receptor kinase	-	GO:0002229,GO:0002239,GO:0005575,GO:0005622,GO:0005623,GO:0005737,GO:0005773,GO:0005886,GO:0006950,GO:0006952,GO:0008150,GO:0009605,GO:0009607,GO:0009617,GO:0016020,GO:0042742,GO:0043207,GO:0043226,GO:0043227,GO:0043229,GO:0043231,GO:0044424,GO:0044444,GO:0044464,GO:0050896,GO:0051704,GO:0051707,GO:0071944,GO:0098542	-	-	-	-	-	-	-	-	-	-	Lectin_legB,Pkinase
lcl|ORF1_TRINITY_DN19191_c0_g2_i1_142_2145	29760.VIT_17s0000g09170.t01	0.0	954.0	COG0515@1|root,2QR0Z@2759|Eukaryota,37QZE@33090|Viridiplantae,3GFIA@35493|Streptophyta	35493|Streptophyta	T	L-type lectin-domain containing receptor kinase	-	GO:0002229,GO:0002239,GO:0005575,GO:0005622,GO:0005623,GO:0005737,GO:0005773,GO:0005886,GO:0006950,GO:0006952,GO:0008150,GO:0009605,GO:0009607,GO:0009617,GO:0016020,GO:0042742,GO:0043207,GO:0043226,GO:0043227,GO:0043229,GO:0043231,GO:0044424,GO:0044444,GO:0044464,GO:0050896,GO:0051704,GO:0051707,GO:0071944,GO:0098542	-	-	-	-	-	-	-	-	-	-	Lectin_legB,Pkinase
lcl|ORF1_TRINITY_DN29916_c0_g1_i1_175_1707	29760.VIT_17s0000g09170.t01	6.19e-267	748.0	COG0515@1|root,2QR0Z@2759|Eukaryota,37QZE@33090|Viridiplantae,3GFIA@35493|Streptophyta	35493|Streptophyta	T	L-type lectin-domain containing receptor kinase	-	GO:0002229,GO:0002239,GO:0005575,GO:0005622,GO:0005623,GO:0005737,GO:0005773,GO:0005886,GO:0006950,GO:0006952,GO:0008150,GO:0009605,GO:0009607,GO:0009617,GO:0016020,GO:0042742,GO:0043207,GO:0043226,GO:0043227,GO:0043229,GO:0043231,GO:0044424,GO:0044444,GO:0044464,GO:0050896,GO:0051704,GO:0051707,GO:0071944,GO:0098542	-	-	-	-	-	-	-	-	-	-	Lectin_legB,Pkinase
lcl|ORF1_TRINITY_DN17115_c0_g1_i1_148_1689	29760.VIT_17s0000g09170.t01	1.11e-270	758.0	COG0515@1|root,2QR0Z@2759|Eukaryota,37QZE@33090|Viridiplantae,3GFIA@35493|Streptophyta	35493|Streptophyta	T	L-type lectin-domain containing receptor kinase	-	GO:0002229,GO:0002239,GO:0005575,GO:0005622,GO:0005623,GO:0005737,GO:0005773,GO:0005886,GO:0006950,GO:0006952,GO:0008150,GO:0009605,GO:0009607,GO:0009617,GO:0016020,GO:0042742,GO:0043207,GO:0043226,GO:0043227,GO:0043229,GO:0043231,GO:0044424,GO:0044444,GO:0044464,GO:0050896,GO:0051704,GO:0051707,GO:0071944,GO:0098542	-	-	-	-	-	-	-	-	-	-	Lectin_legB,Pkinase
lcl|ORF4_TRINITY_DN18929_c0_g2_i5_200_1282	102107.XP_008233495.1	7.05e-134	392.0	KOG1021@1|root,KOG1021@2759|Eukaryota,37JNW@33090|Viridiplantae,3GCZ8@35493|Streptophyta,4JMMR@91835|fabids	35493|Streptophyta	GMW	Glycosyltransferase	-	-	-	-	-	-	-	-	-	-	-	-	Exostosin
lcl|ORF2_TRINITY_DN3623_c0_g1_i2_157_1239	102107.XP_008233495.1	2.32e-132	389.0	KOG1021@1|root,KOG1021@2759|Eukaryota,37JNW@33090|Viridiplantae,3GCZ8@35493|Streptophyta,4JMMR@91835|fabids	35493|Streptophyta	GMW	Glycosyltransferase	-	-	-	-	-	-	-	-	-	-	-	-	Exostosin
lcl|ORF1_TRINITY_DN95141_c0_g1_i1_228_1310	102107.XP_008233495.1	4.66e-132	388.0	KOG1021@1|root,KOG1021@2759|Eukaryota,37JNW@33090|Viridiplantae,3GCZ8@35493|Streptophyta,4JMMR@91835|fabids	35493|Streptophyta	GMW	Glycosyltransferase	-	-	-	-	-	-	-	-	-	-	-	-	Exostosin
XP_028092685.1	102107.XP_008233495.1	6.61e-132	387.0	KOG1021@1|root,KOG1021@2759|Eukaryota,37JNW@33090|Viridiplantae,3GCZ8@35493|Streptophyta,4JMMR@91835|fabids	35493|Streptophyta	GMW	Glycosyltransferase	-	-	-	-	-	-	-	-	-	-	-	-	Exostosin
lcl|ORF8_TRINITY_DN14_c0_g1_i1_1358_276	102107.XP_008233495.1	3.51e-134	393.0	KOG1021@1|root,KOG1021@2759|Eukaryota,37JNW@33090|Viridiplantae,3GCZ8@35493|Streptophyta,4JMMR@91835|fabids	35493|Streptophyta	GMW	Glycosyltransferase	-	-	-	-	-	-	-	-	-	-	-	-	Exostosin
lcl|ORF7_TRINITY_DN20663_c0_g1_i1_1194_112	102107.XP_008233495.1	6.61e-132	387.0	KOG1021@1|root,KOG1021@2759|Eukaryota,37JNW@33090|Viridiplantae,3GCZ8@35493|Streptophyta,4JMMR@91835|fabids	35493|Streptophyta	GMW	Glycosyltransferase	-	-	-	-	-	-	-	-	-	-	-	-	Exostosin
lcl|ORF7_TRINITY_DN5546_c0_g1_i3_1514_432	102107.XP_008233495.1	2.17e-130	384.0	KOG1021@1|root,KOG1021@2759|Eukaryota,37JNW@33090|Viridiplantae,3GCZ8@35493|Streptophyta,4JMMR@91835|fabids	35493|Streptophyta	GMW	Glycosyltransferase	-	-	-	-	-	-	-	-	-	-	-	-	Exostosin
lcl|ORF9_TRINITY_DN5156_c0_g1_i2_1198_116	102107.XP_008233495.1	4.66e-132	388.0	KOG1021@1|root,KOG1021@2759|Eukaryota,37JNW@33090|Viridiplantae,3GCZ8@35493|Streptophyta,4JMMR@91835|fabids	35493|Streptophyta	GMW	Glycosyltransferase	-	-	-	-	-	-	-	-	-	-	-	-	Exostosin
lcl|ORF5_TRINITY_DN6029_c0_g1_i2_41_643	4432.XP_010274888.1	7.04e-114	329.0	COG1535@1|root,2QQB1@2759|Eukaryota,37IJ0@33090|Viridiplantae,3GBAF@35493|Streptophyta	35493|Streptophyta	Q	nicotinamidase activity	-	GO:0003674,GO:0003824,GO:0006139,GO:0006725,GO:0006732,GO:0006733,GO:0006753,GO:0006793,GO:0006796,GO:0006807,GO:0008150,GO:0008152,GO:0008936,GO:0009117,GO:0009987,GO:0016787,GO:0016810,GO:0016811,GO:0019362,GO:0019637,GO:0019674,GO:0034641,GO:0044237,GO:0044238,GO:0044281,GO:0046483,GO:0046496,GO:0051186,GO:0055086,GO:0071704,GO:0072524,GO:1901360,GO:1901564	-	-	-	-	-	-	-	-	-	-	Isochorismatase
lcl|ORF6_TRINITY_DN3056_c0_g1_i2_1020_418	4432.XP_010274888.1	2.02e-113	328.0	COG1535@1|root,2QQB1@2759|Eukaryota,37IJ0@33090|Viridiplantae,3GBAF@35493|Streptophyta	35493|Streptophyta	Q	nicotinamidase activity	-	GO:0003674,GO:0003824,GO:0006139,GO:0006725,GO:0006732,GO:0006733,GO:0006753,GO:0006793,GO:0006796,GO:0006807,GO:0008150,GO:0008152,GO:0008936,GO:0009117,GO:0009987,GO:0016787,GO:0016810,GO:0016811,GO:0019362,GO:0019637,GO:0019674,GO:0034641,GO:0044237,GO:0044238,GO:0044281,GO:0046483,GO:0046496,GO:0051186,GO:0055086,GO:0071704,GO:0072524,GO:1901360,GO:1901564	-	-	-	-	-	-	-	-	-	-	Isochorismatase
lcl|ORF4_TRINITY_DN21714_c0_g1_i1_77_679	4432.XP_010274888.1	7.04e-114	329.0	COG1535@1|root,2QQB1@2759|Eukaryota,37IJ0@33090|Viridiplantae,3GBAF@35493|Streptophyta	35493|Streptophyta	Q	nicotinamidase activity	-	GO:0003674,GO:0003824,GO:0006139,GO:0006725,GO:0006732,GO:0006733,GO:0006753,GO:0006793,GO:0006796,GO:0006807,GO:0008150,GO:0008152,GO:0008936,GO:0009117,GO:0009987,GO:0016787,GO:0016810,GO:0016811,GO:0019362,GO:0019637,GO:0019674,GO:0034641,GO:0044237,GO:0044238,GO:0044281,GO:0046483,GO:0046496,GO:0051186,GO:0055086,GO:0071704,GO:0072524,GO:1901360,GO:1901564	-	-	-	-	-	-	-	-	-	-	Isochorismatase
XP_028121214.1	4432.XP_010274888.1	9.99e-114	329.0	COG1535@1|root,2QQB1@2759|Eukaryota,37IJ0@33090|Viridiplantae,3GBAF@35493|Streptophyta	35493|Streptophyta	Q	nicotinamidase activity	-	GO:0003674,GO:0003824,GO:0006139,GO:0006725,GO:0006732,GO:0006733,GO:0006753,GO:0006793,GO:0006796,GO:0006807,GO:0008150,GO:0008152,GO:0008936,GO:0009117,GO:0009987,GO:0016787,GO:0016810,GO:0016811,GO:0019362,GO:0019637,GO:0019674,GO:0034641,GO:0044237,GO:0044238,GO:0044281,GO:0046483,GO:0046496,GO:0051186,GO:0055086,GO:0071704,GO:0072524,GO:1901360,GO:1901564	-	-	-	-	-	-	-	-	-	-	Isochorismatase
lcl|ORF2_TRINITY_DN3438_c0_g1_i1_229_831	4432.XP_010274888.1	1.73e-114	331.0	COG1535@1|root,2QQB1@2759|Eukaryota,37IJ0@33090|Viridiplantae,3GBAF@35493|Streptophyta	35493|Streptophyta	Q	nicotinamidase activity	-	GO:0003674,GO:0003824,GO:0006139,GO:0006725,GO:0006732,GO:0006733,GO:0006753,GO:0006793,GO:0006796,GO:0006807,GO:0008150,GO:0008152,GO:0008936,GO:0009117,GO:0009987,GO:0016787,GO:0016810,GO:0016811,GO:0019362,GO:0019637,GO:0019674,GO:0034641,GO:0044237,GO:0044238,GO:0044281,GO:0046483,GO:0046496,GO:0051186,GO:0055086,GO:0071704,GO:0072524,GO:1901360,GO:1901564	-	-	-	-	-	-	-	-	-	-	Isochorismatase
lcl|ORF3_TRINITY_DN2406_c0_g1_i3_173_679	4432.XP_010274888.1	1.74e-101	296.0	COG1535@1|root,2QQB1@2759|Eukaryota,37IJ0@33090|Viridiplantae,3GBAF@35493|Streptophyta	35493|Streptophyta	Q	nicotinamidase activity	-	GO:0003674,GO:0003824,GO:0006139,GO:0006725,GO:0006732,GO:0006733,GO:0006753,GO:0006793,GO:0006796,GO:0006807,GO:0008150,GO:0008152,GO:0008936,GO:0009117,GO:0009987,GO:0016787,GO:0016810,GO:0016811,GO:0019362,GO:0019637,GO:0019674,GO:0034641,GO:0044237,GO:0044238,GO:0044281,GO:0046483,GO:0046496,GO:0051186,GO:0055086,GO:0071704,GO:0072524,GO:1901360,GO:1901564	-	-	-	-	-	-	-	-	-	-	Isochorismatase
lcl|ORF1_TRINITY_DN9301_c0_g1_i2_60_710	4432.XP_010274888.1	1.33e-113	329.0	COG1535@1|root,2QQB1@2759|Eukaryota,37IJ0@33090|Viridiplantae,3GBAF@35493|Streptophyta	35493|Streptophyta	Q	nicotinamidase activity	-	GO:0003674,GO:0003824,GO:0006139,GO:0006725,GO:0006732,GO:0006733,GO:0006753,GO:0006793,GO:0006796,GO:0006807,GO:0008150,GO:0008152,GO:0008936,GO:0009117,GO:0009987,GO:0016787,GO:0016810,GO:0016811,GO:0019362,GO:0019637,GO:0019674,GO:0034641,GO:0044237,GO:0044238,GO:0044281,GO:0046483,GO:0046496,GO:0051186,GO:0055086,GO:0071704,GO:0072524,GO:1901360,GO:1901564	-	-	-	-	-	-	-	-	-	-	Isochorismatase
lcl|ORF8_TRINITY_DN59960_c0_g1_i1_834_232	4432.XP_010274888.1	1.42e-113	328.0	COG1535@1|root,2QQB1@2759|Eukaryota,37IJ0@33090|Viridiplantae,3GBAF@35493|Streptophyta	35493|Streptophyta	Q	nicotinamidase activity	-	GO:0003674,GO:0003824,GO:0006139,GO:0006725,GO:0006732,GO:0006733,GO:0006753,GO:0006793,GO:0006796,GO:0006807,GO:0008150,GO:0008152,GO:0008936,GO:0009117,GO:0009987,GO:0016787,GO:0016810,GO:0016811,GO:0019362,GO:0019637,GO:0019674,GO:0034641,GO:0044237,GO:0044238,GO:0044281,GO:0046483,GO:0046496,GO:0051186,GO:0055086,GO:0071704,GO:0072524,GO:1901360,GO:1901564	-	-	-	-	-	-	-	-	-	-	Isochorismatase
lcl|ORF1_TRINITY_DN6041_c0_g1_i1_42_3059	29760.VIT_04s0023g01750.t01	0.0	1653.0	KOG2063@1|root,KOG2063@2759|Eukaryota,37K0S@33090|Viridiplantae,3GB1Y@35493|Streptophyta	35493|Streptophyta	U	Vam6 Vps39-like protein	-	GO:0000323,GO:0000325,GO:0005575,GO:0005622,GO:0005623,GO:0005737,GO:0005764,GO:0005765,GO:0005768,GO:0005770,GO:0005773,GO:0005774,GO:0005911,GO:0006810,GO:0006906,GO:0006914,GO:0006996,GO:0007033,GO:0007034,GO:0007041,GO:0008150,GO:0008152,GO:0008333,GO:0009056,GO:0009506,GO:0009705,GO:0009987,GO:0010008,GO:0012505,GO:0016020,GO:0016043,GO:0016050,GO:0016192,GO:0016197,GO:0030054,GO:0030897,GO:…	-	ko:K20183	ko04138,map04138	-	-	-	ko00000,ko00001,ko04131	-	-	-	CNH,Clathrin,Vps39_1,Vps39_2
lcl|ORF11_TRINITY_DN9253_c0_g1_i1_3630_613	29760.VIT_04s0023g01750.t01	0.0	1652.0	KOG2063@1|root,KOG2063@2759|Eukaryota,37K0S@33090|Viridiplantae,3GB1Y@35493|Streptophyta	35493|Streptophyta	U	Vam6 Vps39-like protein	-	GO:0000323,GO:0000325,GO:0005575,GO:0005622,GO:0005623,GO:0005737,GO:0005764,GO:0005765,GO:0005768,GO:0005770,GO:0005773,GO:0005774,GO:0005911,GO:0006810,GO:0006906,GO:0006914,GO:0006996,GO:0007033,GO:0007034,GO:0007041,GO:0008150,GO:0008152,GO:0008333,GO:0009056,GO:0009506,GO:0009705,GO:0009987,GO:0010008,GO:0012505,GO:0016020,GO:0016043,GO:0016050,GO:0016192,GO:0016197,GO:0030054,GO:0030897,GO:…	-	ko:K20183	ko04138,map04138	-	-	-	ko00000,ko00001,ko04131	-	-	-	CNH,Clathrin,Vps39_1,Vps39_2
lcl|ORF11_TRINITY_DN4557_c0_g1_i1_3695_678	29760.VIT_04s0023g01750.t01	0.0	1653.0	KOG2063@1|root,KOG2063@2759|Eukaryota,37K0S@33090|Viridiplantae,3GB1Y@35493|Streptophyta	35493|Streptophyta	U	Vam6 Vps39-like protein	-	GO:0000323,GO:0000325,GO:0005575,GO:0005622,GO:0005623,GO:0005737,GO:0005764,GO:0005765,GO:0005768,GO:0005770,GO:0005773,GO:0005774,GO:0005911,GO:0006810,GO:0006906,GO:0006914,GO:0006996,GO:0007033,GO:0007034,GO:0007041,GO:0008150,GO:0008152,GO:0008333,GO:0009056,GO:0009506,GO:0009705,GO:0009987,GO:0010008,GO:0012505,GO:0016020,GO:0016043,GO:0016050,GO:0016192,GO:0016197,GO:0030054,GO:0030897,GO:…	-	ko:K20183	ko04138,map04138	-	-	-	ko00000,ko00001,ko04131	-	-	-	CNH,Clathrin,Vps39_1,Vps39_2
XP_028117515.1	29760.VIT_04s0023g01750.t01	0.0	1650.0	KOG2063@1|root,KOG2063@2759|Eukaryota,37K0S@33090|Viridiplantae,3GB1Y@35493|Streptophyta	35493|Streptophyta	U	Vam6 Vps39-like protein	-	GO:0000323,GO:0000325,GO:0005575,GO:0005622,GO:0005623,GO:0005737,GO:0005764,GO:0005765,GO:0005768,GO:0005770,GO:0005773,GO:0005774,GO:0005911,GO:0006810,GO:0006906,GO:0006914,GO:0006996,GO:0007033,GO:0007034,GO:0007041,GO:0008150,GO:0008152,GO:0008333,GO:0009056,GO:0009506,GO:0009705,GO:0009987,GO:0010008,GO:0012505,GO:0016020,GO:0016043,GO:0016050,GO:0016192,GO:0016197,GO:0030054,GO:0030897,GO:…	-	ko:K20183	ko04138,map04138	-	-	-	ko00000,ko00001,ko04131	-	-	-	CNH,Clathrin,Vps39_1,Vps39_2
lcl|ORF11_TRINITY_DN3456_c0_g1_i10_4378_2351	29760.VIT_04s0023g01750.t01	0.0	1117.0	KOG2063@1|root,KOG2063@2759|Eukaryota,37K0S@33090|Viridiplantae,3GB1Y@35493|Streptophyta	35493|Streptophyta	U	Vam6 Vps39-like protein	-	GO:0000323,GO:0000325,GO:0005575,GO:0005622,GO:0005623,GO:0005737,GO:0005764,GO:0005765,GO:0005768,GO:0005770,GO:0005773,GO:0005774,GO:0005911,GO:0006810,GO:0006906,GO:0006914,GO:0006996,GO:0007033,GO:0007034,GO:0007041,GO:0008150,GO:0008152,GO:0008333,GO:0009056,GO:0009506,GO:0009705,GO:0009987,GO:0010008,GO:0012505,GO:0016020,GO:0016043,GO:0016050,GO:0016192,GO:0016197,GO:0030054,GO:0030897,GO:…	-	ko:K20183	ko04138,map04138	-	-	-	ko00000,ko00001,ko04131	-	-	-	CNH,Clathrin,Vps39_1,Vps39_2
lcl|ORF1_TRINITY_DN3840_c0_g1_i4_60_2153	29760.VIT_04s0023g01750.t01	0.0	1160.0	KOG2063@1|root,KOG2063@2759|Eukaryota,37K0S@33090|Viridiplantae,3GB1Y@35493|Streptophyta	35493|Streptophyta	U	Vam6 Vps39-like protein	-	GO:0000323,GO:0000325,GO:0005575,GO:0005622,GO:0005623,GO:0005737,GO:0005764,GO:0005765,GO:0005768,GO:0005770,GO:0005773,GO:0005774,GO:0005911,GO:0006810,GO:0006906,GO:0006914,GO:0006996,GO:0007033,GO:0007034,GO:0007041,GO:0008150,GO:0008152,GO:0008333,GO:0009056,GO:0009506,GO:0009705,GO:0009987,GO:0010008,GO:0012505,GO:0016020,GO:0016043,GO:0016050,GO:0016192,GO:0016197,GO:0030054,GO:0030897,GO:…	-	ko:K20183	ko04138,map04138	-	-	-	ko00000,ko00001,ko04131	-	-	-	CNH,Clathrin,Vps39_1,Vps39_2
lcl|ORF6_TRINITY_DN8363_c0_g1_i8_16_2184	29760.VIT_04s0023g01750.t01	0.0	1168.0	KOG2063@1|root,KOG2063@2759|Eukaryota,37K0S@33090|Viridiplantae,3GB1Y@35493|Streptophyta	35493|Streptophyta	U	Vam6 Vps39-like protein	-	GO:0000323,GO:0000325,GO:0005575,GO:0005622,GO:0005623,GO:0005737,GO:0005764,GO:0005765,GO:0005768,GO:0005770,GO:0005773,GO:0005774,GO:0005911,GO:0006810,GO:0006906,GO:0006914,GO:0006996,GO:0007033,GO:0007034,GO:0007041,GO:0008150,GO:0008152,GO:0008333,GO:0009056,GO:0009506,GO:0009705,GO:0009987,GO:0010008,GO:0012505,GO:0016020,GO:0016043,GO:0016050,GO:0016192,GO:0016197,GO:0030054,GO:0030897,GO:…	-	ko:K20183	ko04138,map04138	-	-	-	ko00000,ko00001,ko04131	-	-	-	CNH,Clathrin,Vps39_1,Vps39_2
lcl|ORF26_TRINITY_DN3107_c0_g1_i19_3654_637	29760.VIT_04s0023g01750.t01	0.0	1653.0	KOG2063@1|root,KOG2063@2759|Eukaryota,37K0S@33090|Viridiplantae,3GB1Y@35493|Streptophyta	35493|Streptophyta	U	Vam6 Vps39-like protein	-	GO:0000323,GO:0000325,GO:0005575,GO:0005622,GO:0005623,GO:0005737,GO:0005764,GO:0005765,GO:0005768,GO:0005770,GO:0005773,GO:0005774,GO:0005911,GO:0006810,GO:0006906,GO:0006914,GO:0006996,GO:0007033,GO:0007034,GO:0007041,GO:0008150,GO:0008152,GO:0008333,GO:0009056,GO:0009506,GO:0009705,GO:0009987,GO:0010008,GO:0012505,GO:0016020,GO:0016043,GO:0016050,GO:0016192,GO:0016197,GO:0030054,GO:0030897,GO:…	-	ko:K20183	ko04138,map04138	-	-	-	ko00000,ko00001,ko04131	-	-	-	CNH,Clathrin,Vps39_1,Vps39_2
lcl|ORF43_TRINITY_DN6052_c0_g2_i2_138_1	3694.POPTR_0003s15720.1	3.61e-16	74.3	29Z3W@1|root,2RXVC@2759|Eukaryota,37TT0@33090|Viridiplantae,3GHXR@35493|Streptophyta,4JP1I@91835|fabids	35493|Streptophyta	-	-	-	GO:0000724,GO:0000725,GO:0005575,GO:0005622,GO:0005623,GO:0005737,GO:0006139,GO:0006259,GO:0006281,GO:0006302,GO:0006310,GO:0006725,GO:0006807,GO:0006950,GO:0006974,GO:0008150,GO:0008152,GO:0009507,GO:0009536,GO:0009987,GO:0033554,GO:0034641,GO:0043170,GO:0043226,GO:0043227,GO:0043229,GO:0043231,GO:0044237,GO:0044238,GO:0044260,GO:0044424,GO:0044444,GO:0044464,GO:0046483,GO:0050896,GO:0051716,GO:…	-	-	-	-	-	-	-	-	-	-	-
lcl|ORF10_TRINITY_DN2399_c0_g1_i3_1413_676	4155.Migut.C00325.1.p	1.04e-52	176.0	29Z3W@1|root,2RXVC@2759|Eukaryota,37TT0@33090|Viridiplantae,3GHXR@35493|Streptophyta,44J5U@71274|asterids	35493|Streptophyta	-	-	-	GO:0000724,GO:0000725,GO:0005575,GO:0005622,GO:0005623,GO:0005737,GO:0006139,GO:0006259,GO:0006281,GO:0006302,GO:0006310,GO:0006725,GO:0006807,GO:0006950,GO:0006974,GO:0008150,GO:0008152,GO:0009507,GO:0009536,GO:0009987,GO:0033554,GO:0034641,GO:0043170,GO:0043226,GO:0043227,GO:0043229,GO:0043231,GO:0044237,GO:0044238,GO:0044260,GO:0044424,GO:0044444,GO:0044464,GO:0046483,GO:0050896,GO:0051716,GO:…	-	-	-	-	-	-	-	-	-	-	-
lcl|ORF9_TRINITY_DN25357_c0_g1_i2_1291_539	4155.Migut.C00325.1.p	1.23e-52	176.0	29Z3W@1|root,2RXVC@2759|Eukaryota,37TT0@33090|Viridiplantae,3GHXR@35493|Streptophyta,44J5U@71274|asterids	35493|Streptophyta	-	-	-	GO:0000724,GO:0000725,GO:0005575,GO:0005622,GO:0005623,GO:0005737,GO:0006139,GO:0006259,GO:0006281,GO:0006302,GO:0006310,GO:0006725,GO:0006807,GO:0006950,GO:0006974,GO:0008150,GO:0008152,GO:0009507,GO:0009536,GO:0009987,GO:0033554,GO:0034641,GO:0043170,GO:0043226,GO:0043227,GO:0043229,GO:0043231,GO:0044237,GO:0044238,GO:0044260,GO:0044424,GO:0044444,GO:0044464,GO:0046483,GO:0050896,GO:0051716,GO:…	-	-	-	-	-	-	-	-	-	-	-
XP_028076628.1	4155.Migut.C00325.1.p	9.25e-82	249.0	29Z3W@1|root,2RXVC@2759|Eukaryota,37TT0@33090|Viridiplantae,3GHXR@35493|Streptophyta,44J5U@71274|asterids	35493|Streptophyta	-	-	-	GO:0000724,GO:0000725,GO:0005575,GO:0005622,GO:0005623,GO:0005737,GO:0006139,GO:0006259,GO:0006281,GO:0006302,GO:0006310,GO:0006725,GO:0006807,GO:0006950,GO:0006974,GO:0008150,GO:0008152,GO:0009507,GO:0009536,GO:0009987,GO:0033554,GO:0034641,GO:0043170,GO:0043226,GO:0043227,GO:0043229,GO:0043231,GO:0044237,GO:0044238,GO:0044260,GO:0044424,GO:0044444,GO:0044464,GO:0046483,GO:0050896,GO:0051716,GO:…	-	-	-	-	-	-	-	-	-	-	-
lcl|ORF8_TRINITY_DN11045_c0_g1_i1_1247_456	4155.Migut.C00325.1.p	4.7e-81	249.0	29Z3W@1|root,2RXVC@2759|Eukaryota,37TT0@33090|Viridiplantae,3GHXR@35493|Streptophyta,44J5U@71274|asterids	35493|Streptophyta	-	-	-	GO:0000724,GO:0000725,GO:0005575,GO:0005622,GO:0005623,GO:0005737,GO:0006139,GO:0006259,GO:0006281,GO:0006302,GO:0006310,GO:0006725,GO:0006807,GO:0006950,GO:0006974,GO:0008150,GO:0008152,GO:0009507,GO:0009536,GO:0009987,GO:0033554,GO:0034641,GO:0043170,GO:0043226,GO:0043227,GO:0043229,GO:0043231,GO:0044237,GO:0044238,GO:0044260,GO:0044424,GO:0044444,GO:0044464,GO:0046483,GO:0050896,GO:0051716,GO:…	-	-	-	-	-	-	-	-	-	-	-
lcl|ORF4_TRINITY_DN9595_c0_g1_i5_125_733	4155.Migut.C00325.1.p	2.35e-53	176.0	29Z3W@1|root,2RXVC@2759|Eukaryota,37TT0@33090|Viridiplantae,3GHXR@35493|Streptophyta,44J5U@71274|asterids	35493|Streptophyta	-	-	-	GO:0000724,GO:0000725,GO:0005575,GO:0005622,GO:0005623,GO:0005737,GO:0006139,GO:0006259,GO:0006281,GO:0006302,GO:0006310,GO:0006725,GO:0006807,GO:0006950,GO:0006974,GO:0008150,GO:0008152,GO:0009507,GO:0009536,GO:0009987,GO:0033554,GO:0034641,GO:0043170,GO:0043226,GO:0043227,GO:0043229,GO:0043231,GO:0044237,GO:0044238,GO:0044260,GO:0044424,GO:0044444,GO:0044464,GO:0046483,GO:0050896,GO:0051716,GO:…	-	-	-	-	-	-	-	-	-	-	-
lcl|ORF23_TRINITY_DN2887_c0_g1_i3_947_417	4155.Migut.C00325.1.p	1.76e-82	249.0	29Z3W@1|root,2RXVC@2759|Eukaryota,37TT0@33090|Viridiplantae,3GHXR@35493|Streptophyta,44J5U@71274|asterids	35493|Streptophyta	-	-	-	GO:0000724,GO:0000725,GO:0005575,GO:0005622,GO:0005623,GO:0005737,GO:0006139,GO:0006259,GO:0006281,GO:0006302,GO:0006310,GO:0006725,GO:0006807,GO:0006950,GO:0006974,GO:0008150,GO:0008152,GO:0009507,GO:0009536,GO:0009987,GO:0033554,GO:0034641,GO:0043170,GO:0043226,GO:0043227,GO:0043229,GO:0043231,GO:0044237,GO:0044238,GO:0044260,GO:0044424,GO:0044444,GO:0044464,GO:0046483,GO:0050896,GO:0051716,GO:…	-	-	-	-	-	-	-	-	-	-	-
lcl|ORF1_TRINITY_DN1367_c0_g1_i1_129_788	4155.Migut.C00325.1.p	9.25e-82	249.0	29Z3W@1|root,2RXVC@2759|Eukaryota,37TT0@33090|Viridiplantae,3GHXR@35493|Streptophyta,44J5U@71274|asterids	35493|Streptophyta	-	-	-	GO:0000724,GO:0000725,GO:0005575,GO:0005622,GO:0005623,GO:0005737,GO:0006139,GO:0006259,GO:0006281,GO:0006302,GO:0006310,GO:0006725,GO:0006807,GO:0006950,GO:0006974,GO:0008150,GO:0008152,GO:0009507,GO:0009536,GO:0009987,GO:0033554,GO:0034641,GO:0043170,GO:0043226,GO:0043227,GO:0043229,GO:0043231,GO:0044237,GO:0044238,GO:0044260,GO:0044424,GO:0044444,GO:0044464,GO:0046483,GO:0050896,GO:0051716,GO:…	-	-	-	-	-	-	-	-	-	-	-
lcl|ORF12_TRINITY_DN6059_c0_g1_i7_3489_472	2711.XP_006481068.1	0.0	1647.0	COG5657@1|root,KOG1993@2759|Eukaryota,37HXV@33090|Viridiplantae,3GA3R@35493|Streptophyta	35493|Streptophyta	UY	Importin-beta N-terminal domain	-	GO:0001650,GO:0003674,GO:0005215,GO:0005575,GO:0005622,GO:0005623,GO:0005634,GO:0005635,GO:0005730,GO:0005737,GO:0005829,GO:0006810,GO:0008104,GO:0008150,GO:0008565,GO:0012505,GO:0015031,GO:0015833,GO:0031967,GO:0031974,GO:0031975,GO:0031981,GO:0033036,GO:0042886,GO:0043226,GO:0043227,GO:0043228,GO:0043229,GO:0043231,GO:0043232,GO:0043233,GO:0044422,GO:0044424,GO:0044428,GO:0044444,GO:0044446,GO:…	-	-	-	-	-	-	-	-	-	-	IBN_N,Xpo1
lcl|ORF12_TRINITY_DN1711_c2_g1_i1_3487_470	2711.XP_006481068.1	0.0	1647.0	COG5657@1|root,KOG1993@2759|Eukaryota,37HXV@33090|Viridiplantae,3GA3R@35493|Streptophyta	35493|Streptophyta	UY	Importin-beta N-terminal domain	-	GO:0001650,GO:0003674,GO:0005215,GO:0005575,GO:0005622,GO:0005623,GO:0005634,GO:0005635,GO:0005730,GO:0005737,GO:0005829,GO:0006810,GO:0008104,GO:0008150,GO:0008565,GO:0012505,GO:0015031,GO:0015833,GO:0031967,GO:0031974,GO:0031975,GO:0031981,GO:0033036,GO:0042886,GO:0043226,GO:0043227,GO:0043228,GO:0043229,GO:0043231,GO:0043232,GO:0043233,GO:0044422,GO:0044424,GO:0044428,GO:0044444,GO:0044446,GO:…	-	-	-	-	-	-	-	-	-	-	IBN_N,Xpo1
lcl|ORF8_TRINITY_DN28407_c0_g1_i9_1395_1	2711.XP_006481068.1	2.1e-272	773.0	COG5657@1|root,KOG1993@2759|Eukaryota,37HXV@33090|Viridiplantae,3GA3R@35493|Streptophyta	35493|Streptophyta	UY	Importin-beta N-terminal domain	-	GO:0001650,GO:0003674,GO:0005215,GO:0005575,GO:0005622,GO:0005623,GO:0005634,GO:0005635,GO:0005730,GO:0005737,GO:0005829,GO:0006810,GO:0008104,GO:0008150,GO:0008565,GO:0012505,GO:0015031,GO:0015833,GO:0031967,GO:0031974,GO:0031975,GO:0031981,GO:0033036,GO:0042886,GO:0043226,GO:0043227,GO:0043228,GO:0043229,GO:0043231,GO:0043232,GO:0043233,GO:0044422,GO:0044424,GO:0044428,GO:0044444,GO:0044446,GO:…	-	-	-	-	-	-	-	-	-	-	IBN_N,Xpo1
XP_028057457.1	2711.XP_006481068.1	0.0	1645.0	COG5657@1|root,KOG1993@2759|Eukaryota,37HXV@33090|Viridiplantae,3GA3R@35493|Streptophyta	35493|Streptophyta	UY	Importin-beta N-terminal domain	-	GO:0001650,GO:0003674,GO:0005215,GO:0005575,GO:0005622,GO:0005623,GO:0005634,GO:0005635,GO:0005730,GO:0005737,GO:0005829,GO:0006810,GO:0008104,GO:0008150,GO:0008565,GO:0012505,GO:0015031,GO:0015833,GO:0031967,GO:0031974,GO:0031975,GO:0031981,GO:0033036,GO:0042886,GO:0043226,GO:0043227,GO:0043228,GO:0043229,GO:0043231,GO:0043232,GO:0043233,GO:0044422,GO:0044424,GO:0044428,GO:0044444,GO:0044446,GO:…	-	-	-	-	-	-	-	-	-	-	IBN_N,Xpo1
lcl|ORF9_TRINITY_DN1365_c0_g3_i1_338_3355	2711.XP_006481068.1	0.0	1650.0	COG5657@1|root,KOG1993@2759|Eukaryota,37HXV@33090|Viridiplantae,3GA3R@35493|Streptophyta	35493|Streptophyta	UY	Importin-beta N-terminal domain	-	GO:0001650,GO:0003674,GO:0005215,GO:0005575,GO:0005622,GO:0005623,GO:0005634,GO:0005635,GO:0005730,GO:0005737,GO:0005829,GO:0006810,GO:0008104,GO:0008150,GO:0008565,GO:0012505,GO:0015031,GO:0015833,GO:0031967,GO:0031974,GO:0031975,GO:0031981,GO:0033036,GO:0042886,GO:0043226,GO:0043227,GO:0043228,GO:0043229,GO:0043231,GO:0043232,GO:0043233,GO:0044422,GO:0044424,GO:0044428,GO:0044444,GO:0044446,GO:…	-	-	-	-	-	-	-	-	-	-	IBN_N,Xpo1
lcl|ORF17_TRINITY_DN24269_c0_g1_i2_3426_409	2711.XP_006481068.1	0.0	1650.0	COG5657@1|root,KOG1993@2759|Eukaryota,37HXV@33090|Viridiplantae,3GA3R@35493|Streptophyta	35493|Streptophyta	UY	Importin-beta N-terminal domain	-	GO:0001650,GO:0003674,GO:0005215,GO:0005575,GO:0005622,GO:0005623,GO:0005634,GO:0005635,GO:0005730,GO:0005737,GO:0005829,GO:0006810,GO:0008104,GO:0008150,GO:0008565,GO:0012505,GO:0015031,GO:0015833,GO:0031967,GO:0031974,GO:0031975,GO:0031981,GO:0033036,GO:0042886,GO:0043226,GO:0043227,GO:0043228,GO:0043229,GO:0043231,GO:0043232,GO:0043233,GO:0044422,GO:0044424,GO:0044428,GO:0044444,GO:0044446,GO:…	-	-	-	-	-	-	-	-	-	-	IBN_N,Xpo1
lcl|ORF14_TRINITY_DN14986_c0_g1_i3_3491_474	2711.XP_006481068.1	0.0	1649.0	COG5657@1|root,KOG1993@2759|Eukaryota,37HXV@33090|Viridiplantae,3GA3R@35493|Streptophyta	35493|Streptophyta	UY	Importin-beta N-terminal domain	-	GO:0001650,GO:0003674,GO:0005215,GO:0005575,GO:0005622,GO:0005623,GO:0005634,GO:0005635,GO:0005730,GO:0005737,GO:0005829,GO:0006810,GO:0008104,GO:0008150,GO:0008565,GO:0012505,GO:0015031,GO:0015833,GO:0031967,GO:0031974,GO:0031975,GO:0031981,GO:0033036,GO:0042886,GO:0043226,GO:0043227,GO:0043228,GO:0043229,GO:0043231,GO:0043232,GO:0043233,GO:0044422,GO:0044424,GO:0044428,GO:0044444,GO:0044446,GO:…	-	-	-	-	-	-	-	-	-	-	IBN_N,Xpo1
lcl|ORF14_TRINITY_DN7342_c0_g1_i2_3581_807	2711.XP_006481068.1	0.0	1522.0	COG5657@1|root,KOG1993@2759|Eukaryota,37HXV@33090|Viridiplantae,3GA3R@35493|Streptophyta	35493|Streptophyta	UY	Importin-beta N-terminal domain	-	GO:0001650,GO:0003674,GO:0005215,GO:0005575,GO:0005622,GO:0005623,GO:0005634,GO:0005635,GO:0005730,GO:0005737,GO:0005829,GO:0006810,GO:0008104,GO:0008150,GO:0008565,GO:0012505,GO:0015031,GO:0015833,GO:0031967,GO:0031974,GO:0031975,GO:0031981,GO:0033036,GO:0042886,GO:0043226,GO:0043227,GO:0043228,GO:0043229,GO:0043231,GO:0043232,GO:0043233,GO:0044422,GO:0044424,GO:0044428,GO:0044444,GO:0044446,GO:…	-	-	-	-	-	-	-	-	-	-	IBN_N,Xpo1
lcl|ORF1_TRINITY_DN43929_c0_g1_i1_15_617	29760.VIT_15s0048g02530.t01	4.3e-93	277.0	28XWY@1|root,2R4QG@2759|Eukaryota,37T2J@33090|Viridiplantae,3GHCH@35493|Streptophyta	35493|Streptophyta	S	Late embryogenesis abundant protein	-	-	-	-	-	-	-	-	-	-	-	-	LEA_2
lcl|ORF4_TRINITY_DN18637_c0_g1_i1_383_0	29760.VIT_15s0048g02530.t01	5.71e-53	172.0	28XWY@1|root,2R4QG@2759|Eukaryota,37T2J@33090|Viridiplantae,3GHCH@35493|Streptophyta	35493|Streptophyta	S	Late embryogenesis abundant protein	-	-	-	-	-	-	-	-	-	-	-	-	LEA_2
lcl|ORF1_TRINITY_DN40616_c0_g1_i1_123_725	29760.VIT_15s0048g02530.t01	1.5e-93	278.0	28XWY@1|root,2R4QG@2759|Eukaryota,37T2J@33090|Viridiplantae,3GHCH@35493|Streptophyta	35493|Streptophyta	S	Late embryogenesis abundant protein	-	-	-	-	-	-	-	-	-	-	-	-	LEA_2
XP_028113877.1	29760.VIT_15s0048g02530.t01	1.43e-91	273.0	28XWY@1|root,2R4QG@2759|Eukaryota,37T2J@33090|Viridiplantae,3GHCH@35493|Streptophyta	35493|Streptophyta	S	Late embryogenesis abundant protein	-	-	-	-	-	-	-	-	-	-	-	-	LEA_2
lcl|ORF5_TRINITY_DN31493_c0_g1_i1_798_196	29760.VIT_15s0048g02530.t01	1.5e-93	278.0	28XWY@1|root,2R4QG@2759|Eukaryota,37T2J@33090|Viridiplantae,3GHCH@35493|Streptophyta	35493|Streptophyta	S	Late embryogenesis abundant protein	-	-	-	-	-	-	-	-	-	-	-	-	LEA_2
lcl|ORF1_TRINITY_DN8848_c0_g1_i1_135_737	29760.VIT_15s0048g02530.t01	1.5e-93	278.0	28XWY@1|root,2R4QG@2759|Eukaryota,37T2J@33090|Viridiplantae,3GHCH@35493|Streptophyta	35493|Streptophyta	S	Late embryogenesis abundant protein	-	-	-	-	-	-	-	-	-	-	-	-	LEA_2
lcl|ORF1_TRINITY_DN30905_c0_g1_i2_147_476	29760.VIT_15s0048g02530.t01	3.05e-45	152.0	28XWY@1|root,2R4QG@2759|Eukaryota,37T2J@33090|Viridiplantae,3GHCH@35493|Streptophyta	35493|Streptophyta	S	Late embryogenesis abundant protein	-	-	-	-	-	-	-	-	-	-	-	-	LEA_2
lcl|ORF2_TRINITY_DN5780_c0_g1_i1_137_739	29760.VIT_15s0048g02530.t01	4.3e-93	277.0	28XWY@1|root,2R4QG@2759|Eukaryota,37T2J@33090|Viridiplantae,3GHCH@35493|Streptophyta	35493|Streptophyta	S	Late embryogenesis abundant protein	-	-	-	-	-	-	-	-	-	-	-	-	LEA_2
lcl|ORF2_TRINITY_DN17017_c0_g1_i2_196_780	3983.cassava4.1_009566m	7.33e-100	300.0	COG0667@1|root,KOG1575@2759|Eukaryota,37JFU@33090|Viridiplantae,3G8QA@35493|Streptophyta,4JHIT@91835|fabids	35493|Streptophyta	C	Aldo/keto reductase family	-	-	-	-	-	-	-	-	-	-	-	-	Aldo_ket_red
lcl|ORF6_TRINITY_DN14047_c0_g1_i1_71_823	2711.XP_006471366.1	1.85e-140	406.0	COG0667@1|root,KOG1575@2759|Eukaryota,37JFU@33090|Viridiplantae,3G8QA@35493|Streptophyta	35493|Streptophyta	C	Aldo/keto reductase family	-	-	-	-	-	-	-	-	-	-	-	-	Aldo_ket_red
lcl|ORF11_TRINITY_DN2991_c0_g2_i8_2297_1509	2711.XP_006471366.1	1.16e-139	404.0	COG0667@1|root,KOG1575@2759|Eukaryota,37JFU@33090|Viridiplantae,3G8QA@35493|Streptophyta	35493|Streptophyta	C	Aldo/keto reductase family	-	-	-	-	-	-	-	-	-	-	-	-	Aldo_ket_red
XP_028076705.1	102107.XP_008227568.1	5.05e-233	646.0	COG0667@1|root,KOG1575@2759|Eukaryota,37JFU@33090|Viridiplantae,3G8QA@35493|Streptophyta,4JHIT@91835|fabids	35493|Streptophyta	C	Aldo/keto reductase family	-	-	-	-	-	-	-	-	-	-	-	-	Aldo_ket_red
lcl|ORF11_TRINITY_DN12006_c0_g1_i6_1393_227	2711.XP_006471366.1	8.12e-234	648.0	COG0667@1|root,KOG1575@2759|Eukaryota,37JFU@33090|Viridiplantae,3G8QA@35493|Streptophyta	35493|Streptophyta	C	Aldo/keto reductase family	-	-	-	-	-	-	-	-	-	-	-	-	Aldo_ket_red
lcl|ORF12_TRINITY_DN7071_c0_g1_i4_1801_1217	3983.cassava4.1_009566m	7.33e-100	300.0	COG0667@1|root,KOG1575@2759|Eukaryota,37JFU@33090|Viridiplantae,3G8QA@35493|Streptophyta,4JHIT@91835|fabids	35493|Streptophyta	C	Aldo/keto reductase family	-	-	-	-	-	-	-	-	-	-	-	-	Aldo_ket_red
lcl|ORF6_TRINITY_DN7594_c0_g1_i1_1497_913	3983.cassava4.1_009566m	1.47e-99	300.0	COG0667@1|root,KOG1575@2759|Eukaryota,37JFU@33090|Viridiplantae,3G8QA@35493|Streptophyta,4JHIT@91835|fabids	35493|Streptophyta	C	Aldo/keto reductase family	-	-	-	-	-	-	-	-	-	-	-	-	Aldo_ket_red
lcl|ORF5_TRINITY_DN9500_c0_g1_i6_1888_1304	3988.XP_002529061.1	4.42e-100	301.0	COG0667@1|root,KOG1575@2759|Eukaryota,37JFU@33090|Viridiplantae,3G8QA@35493|Streptophyta,4JHIT@91835|fabids	35493|Streptophyta	C	Aldo/keto reductase family	-	-	-	-	-	-	-	-	-	-	-	-	Aldo_ket_red
lcl|ORF29_TRINITY_DN12810_c0_g1_i5_4166_177	3641.EOY31114	0.0	1984.0	KOG1912@1|root,KOG1912@2759|Eukaryota,37QJF@33090|Viridiplantae,3GGA9@35493|Streptophyta	35493|Streptophyta	L	WD repeat-containing protein	-	-	-	-	-	-	-	-	-	-	-	-	-
lcl|ORF30_TRINITY_DN13159_c0_g1_i1_4479_490	3641.EOY31114	0.0	1984.0	KOG1912@1|root,KOG1912@2759|Eukaryota,37QJF@33090|Viridiplantae,3GGA9@35493|Streptophyta	35493|Streptophyta	L	WD repeat-containing protein	-	-	-	-	-	-	-	-	-	-	-	-	-
lcl|ORF54_TRINITY_DN10793_c0_g1_i26_4518_529	3641.EOY31114	0.0	1977.0	KOG1912@1|root,KOG1912@2759|Eukaryota,37QJF@33090|Viridiplantae,3GGA9@35493|Streptophyta	35493|Streptophyta	L	WD repeat-containing protein	-	-	-	-	-	-	-	-	-	-	-	-	-
XP_028060945.1	3641.EOY31114	0.0	1993.0	KOG1912@1|root,KOG1912@2759|Eukaryota,37QJF@33090|Viridiplantae,3GGA9@35493|Streptophyta	35493|Streptophyta	L	WD repeat-containing protein	-	-	-	-	-	-	-	-	-	-	-	-	-
lcl|ORF11_TRINITY_DN16_c1_g1_i1_284_4273	3641.EOY31114	0.0	1979.0	KOG1912@1|root,KOG1912@2759|Eukaryota,37QJF@33090|Viridiplantae,3GGA9@35493|Streptophyta	35493|Streptophyta	L	WD repeat-containing protein	-	-	-	-	-	-	-	-	-	-	-	-	-
lcl|ORF20_TRINITY_DN10604_c0_g1_i12_3924_529	3641.EOY31114	0.0	1698.0	KOG1912@1|root,KOG1912@2759|Eukaryota,37QJF@33090|Viridiplantae,3GGA9@35493|Streptophyta	35493|Streptophyta	L	WD repeat-containing protein	-	-	-	-	-	-	-	-	-	-	-	-	-
lcl|ORF31_TRINITY_DN2776_c2_g1_i3_4499_510	3641.EOY31114	0.0	1979.0	KOG1912@1|root,KOG1912@2759|Eukaryota,37QJF@33090|Viridiplantae,3GGA9@35493|Streptophyta	35493|Streptophyta	L	WD repeat-containing protein	-	-	-	-	-	-	-	-	-	-	-	-	-
lcl|ORF22_TRINITY_DN802_c2_g1_i3_4506_517	3641.EOY31114	0.0	1974.0	KOG1912@1|root,KOG1912@2759|Eukaryota,37QJF@33090|Viridiplantae,3GGA9@35493|Streptophyta	35493|Streptophyta	L	WD repeat-containing protein	-	-	-	-	-	-	-	-	-	-	-	-	-
lcl|ORF2_TRINITY_DN12794_c0_g2_i2_76_267	3885.XP_007153904.1	7.89e-18	76.3	2E085@1|root,2S7PF@2759|Eukaryota,37WTZ@33090|Viridiplantae,3GKR8@35493|Streptophyta,4JQX1@91835|fabids	35493|Streptophyta	T	cx9C motif-containing protein 4	-	-	-	-	-	-	-	-	-	-	-	-	MTCP1
lcl|ORF3_TRINITY_DN24631_c0_g1_i1_430_239	3885.XP_007153904.1	7.89e-18	76.3	2E085@1|root,2S7PF@2759|Eukaryota,37WTZ@33090|Viridiplantae,3GKR8@35493|Streptophyta,4JQX1@91835|fabids	35493|Streptophyta	T	cx9C motif-containing protein 4	-	-	-	-	-	-	-	-	-	-	-	-	MTCP1
lcl|ORF3_TRINITY_DN33301_c0_g1_i1_77_268	3885.XP_007153904.1	7.89e-18	76.3	2E085@1|root,2S7PF@2759|Eukaryota,37WTZ@33090|Viridiplantae,3GKR8@35493|Streptophyta,4JQX1@91835|fabids	35493|Streptophyta	T	cx9C motif-containing protein 4	-	-	-	-	-	-	-	-	-	-	-	-	MTCP1
XP_028088921.1	71139.XP_010030143.1	7.56e-30	106.0	2E085@1|root,2S7PF@2759|Eukaryota,37WTZ@33090|Viridiplantae,3GKR8@35493|Streptophyta	35493|Streptophyta	T	cx9C motif-containing protein	-	-	-	-	-	-	-	-	-	-	-	-	MTCP1
lcl|ORF2_TRINITY_DN94937_c0_g1_i1_492_301	3885.XP_007153904.1	7.89e-18	76.3	2E085@1|root,2S7PF@2759|Eukaryota,37WTZ@33090|Viridiplantae,3GKR8@35493|Streptophyta,4JQX1@91835|fabids	35493|Streptophyta	T	cx9C motif-containing protein 4	-	-	-	-	-	-	-	-	-	-	-	-	MTCP1
lcl|ORF4_TRINITY_DN44740_c0_g1_i1_422_231	3885.XP_007153904.1	7.89e-18	76.3	2E085@1|root,2S7PF@2759|Eukaryota,37WTZ@33090|Viridiplantae,3GKR8@35493|Streptophyta,4JQX1@91835|fabids	35493|Streptophyta	T	cx9C motif-containing protein 4	-	-	-	-	-	-	-	-	-	-	-	-	MTCP1
lcl|ORF5_TRINITY_DN2220_c0_g1_i1_80_271	3885.XP_007153904.1	7.89e-18	76.3	2E085@1|root,2S7PF@2759|Eukaryota,37WTZ@33090|Viridiplantae,3GKR8@35493|Streptophyta,4JQX1@91835|fabids	35493|Streptophyta	T	cx9C motif-containing protein 4	-	-	-	-	-	-	-	-	-	-	-	-	MTCP1
lcl|ORF4_TRINITY_DN5993_c0_g1_i1_490_299	3885.XP_007153904.1	7.89e-18	76.3	2E085@1|root,2S7PF@2759|Eukaryota,37WTZ@33090|Viridiplantae,3GKR8@35493|Streptophyta,4JQX1@91835|fabids	35493|Streptophyta	T	cx9C motif-containing protein 4	-	-	-	-	-	-	-	-	-	-	-	-	MTCP1
lcl|ORF1_TRINITY_DN5037_c0_g1_i3_303_2951	3750.XP_008380480.1	3.37e-269	784.0	28N0T@1|root,2QUJN@2759|Eukaryota,37ISP@33090|Viridiplantae,3GCIJ@35493|Streptophyta,4JEPY@91835|fabids	35493|Streptophyta	A	Filamin-type immunoglobulin domains	-	-	-	-	-	-	-	-	-	-	-	-	Filamin,RRM_1
lcl|ORF13_TRINITY_DN1710_c0_g1_i9_3186_538	3750.XP_008380480.1	1.96e-265	774.0	28N0T@1|root,2QUJN@2759|Eukaryota,37ISP@33090|Viridiplantae,3GCIJ@35493|Streptophyta,4JEPY@91835|fabids	35493|Streptophyta	A	Filamin-type immunoglobulin domains	-	-	-	-	-	-	-	-	-	-	-	-	Filamin,RRM_1
lcl|ORF2_TRINITY_DN600_c0_g1_i5_307_2955	3750.XP_008380480.1	1.69e-269	785.0	28N0T@1|root,2QUJN@2759|Eukaryota,37ISP@33090|Viridiplantae,3GCIJ@35493|Streptophyta,4JEPY@91835|fabids	35493|Streptophyta	A	Filamin-type immunoglobulin domains	-	-	-	-	-	-	-	-	-	-	-	-	Filamin,RRM_1
XP_028124881.1	3750.XP_008380480.1	1.69e-269	785.0	28N0T@1|root,2QUJN@2759|Eukaryota,37ISP@33090|Viridiplantae,3GCIJ@35493|Streptophyta,4JEPY@91835|fabids	35493|Streptophyta	A	Filamin-type immunoglobulin domains	-	-	-	-	-	-	-	-	-	-	-	-	Filamin,RRM_1
lcl|ORF1_TRINITY_DN1744_c0_g1_i25_198_2846	3750.XP_008380480.1	1.69e-269	785.0	28N0T@1|root,2QUJN@2759|Eukaryota,37ISP@33090|Viridiplantae,3GCIJ@35493|Streptophyta,4JEPY@91835|fabids	35493|Streptophyta	A	Filamin-type immunoglobulin domains	-	-	-	-	-	-	-	-	-	-	-	-	Filamin,RRM_1
lcl|ORF18_TRINITY_DN112_c0_g2_i6_3207_373	3750.XP_008380480.1	5.13e-266	778.0	28N0T@1|root,2QUJN@2759|Eukaryota,37ISP@33090|Viridiplantae,3GCIJ@35493|Streptophyta,4JEPY@91835|fabids	35493|Streptophyta	A	Filamin-type immunoglobulin domains	-	-	-	-	-	-	-	-	-	-	-	-	Filamin,RRM_1
lcl|ORF18_TRINITY_DN7225_c0_g1_i12_3001_353	3750.XP_008380480.1	9.54e-269	783.0	28N0T@1|root,2QUJN@2759|Eukaryota,37ISP@33090|Viridiplantae,3GCIJ@35493|Streptophyta,4JEPY@91835|fabids	35493|Streptophyta	A	Filamin-type immunoglobulin domains	-	-	-	-	-	-	-	-	-	-	-	-	Filamin,RRM_1
lcl|ORF10_TRINITY_DN5084_c1_g1_i1_194_2842	3750.XP_008380480.1	9.54e-269	783.0	28N0T@1|root,2QUJN@2759|Eukaryota,37ISP@33090|Viridiplantae,3GCIJ@35493|Streptophyta,4JEPY@91835|fabids	35493|Streptophyta	A	Filamin-type immunoglobulin domains	-	-	-	-	-	-	-	-	-	-	-	-	Filamin,RRM_1
lcl|ORF1_TRINITY_DN1072_c0_g1_i1_93_383	3847.GLYMA10G39770.1	2.02e-66	201.0	KOG3476@1|root,KOG3476@2759|Eukaryota,37V8W@33090|Viridiplantae,3GJKC@35493|Streptophyta,4JU7F@91835|fabids	35493|Streptophyta	Z	Cysteine-rich PDZ-binding	-	-	-	-	-	-	-	-	-	-	-	-	Cript
lcl|ORF2_TRINITY_DN2895_c0_g1_i1_573_283	3847.GLYMA10G39770.1	2.02e-66	201.0	KOG3476@1|root,KOG3476@2759|Eukaryota,37V8W@33090|Viridiplantae,3GJKC@35493|Streptophyta,4JU7F@91835|fabids	35493|Streptophyta	Z	Cysteine-rich PDZ-binding	-	-	-	-	-	-	-	-	-	-	-	-	Cript
lcl|ORF1_TRINITY_DN96164_c0_g1_i1_642_232	3847.GLYMA10G39770.1	1.04e-65	201.0	KOG3476@1|root,KOG3476@2759|Eukaryota,37V8W@33090|Viridiplantae,3GJKC@35493|Streptophyta,4JU7F@91835|fabids	35493|Streptophyta	Z	Cysteine-rich PDZ-binding	-	-	-	-	-	-	-	-	-	-	-	-	Cript
XP_028126197.1	3847.GLYMA10G39770.1	2.02e-66	201.0	KOG3476@1|root,KOG3476@2759|Eukaryota,37V8W@33090|Viridiplantae,3GJKC@35493|Streptophyta,4JU7F@91835|fabids	35493|Streptophyta	Z	Cysteine-rich PDZ-binding	-	-	-	-	-	-	-	-	-	-	-	-	Cript
lcl|ORF1_TRINITY_DN1404_c0_g1_i1_517_227	3847.GLYMA10G39770.1	2.02e-66	201.0	KOG3476@1|root,KOG3476@2759|Eukaryota,37V8W@33090|Viridiplantae,3GJKC@35493|Streptophyta,4JU7F@91835|fabids	35493|Streptophyta	Z	Cysteine-rich PDZ-binding	-	-	-	-	-	-	-	-	-	-	-	-	Cript
lcl|ORF1_TRINITY_DN6083_c0_g1_i1_573_283	3847.GLYMA10G39770.1	2.02e-66	201.0	KOG3476@1|root,KOG3476@2759|Eukaryota,37V8W@33090|Viridiplantae,3GJKC@35493|Streptophyta,4JU7F@91835|fabids	35493|Streptophyta	Z	Cysteine-rich PDZ-binding	-	-	-	-	-	-	-	-	-	-	-	-	Cript
lcl|ORF3_TRINITY_DN3473_c0_g1_i1_590_300	3847.GLYMA10G39770.1	2.02e-66	201.0	KOG3476@1|root,KOG3476@2759|Eukaryota,37V8W@33090|Viridiplantae,3GJKC@35493|Streptophyta,4JU7F@91835|fabids	35493|Streptophyta	Z	Cysteine-rich PDZ-binding	-	-	-	-	-	-	-	-	-	-	-	-	Cript
lcl|ORF1_TRINITY_DN6002_c0_g1_i1_105_395	3847.GLYMA10G39770.1	2.02e-66	201.0	KOG3476@1|root,KOG3476@2759|Eukaryota,37V8W@33090|Viridiplantae,3GJKC@35493|Streptophyta,4JU7F@91835|fabids	35493|Streptophyta	Z	Cysteine-rich PDZ-binding	-	-	-	-	-	-	-	-	-	-	-	-	Cript
lcl|ORF11_TRINITY_DN13279_c0_g1_i2_1716_241	225117.XP_009347137.1	1.3e-261	727.0	2CMKA@1|root,2QQNS@2759|Eukaryota,37M9T@33090|Viridiplantae,3GG57@35493|Streptophyta,4JHZU@91835|fabids	35493|Streptophyta	Q	Belongs to the cytochrome P450 family	HPL	GO:0003674,GO:0003824,GO:0004497,GO:0005575,GO:0005622,GO:0005623,GO:0005737,GO:0006082,GO:0006629,GO:0006631,GO:0006950,GO:0008150,GO:0008152,GO:0008202,GO:0009507,GO:0009526,GO:0009536,GO:0009611,GO:0009941,GO:0009987,GO:0016125,GO:0016491,GO:0019752,GO:0031967,GO:0031975,GO:0032787,GO:0043226,GO:0043227,GO:0043229,GO:0043231,GO:0043436,GO:0044237,GO:0044238,GO:0044255,GO:0044281,GO:0044422,GO:…	-	ko:K10528	ko00592,ko01110,map00592,map01110	-	R07868,R07870	RC01950,RC02104	ko00000,ko00001,ko00199,ko01000	-	-	-	p450
lcl|ORF2_TRINITY_DN2593_c0_g1_i1_558_1574	225117.XP_009347137.1	1.28e-171	493.0	2CMKA@1|root,2QQNS@2759|Eukaryota,37M9T@33090|Viridiplantae,3GG57@35493|Streptophyta,4JHZU@91835|fabids	35493|Streptophyta	Q	Belongs to the cytochrome P450 family	HPL	GO:0003674,GO:0003824,GO:0004497,GO:0005575,GO:0005622,GO:0005623,GO:0005737,GO:0006082,GO:0006629,GO:0006631,GO:0006950,GO:0008150,GO:0008152,GO:0008202,GO:0009507,GO:0009526,GO:0009536,GO:0009611,GO:0009941,GO:0009987,GO:0016125,GO:0016491,GO:0019752,GO:0031967,GO:0031975,GO:0032787,GO:0043226,GO:0043227,GO:0043229,GO:0043231,GO:0043436,GO:0044237,GO:0044238,GO:0044255,GO:0044281,GO:0044422,GO:…	-	ko:K10528	ko00592,ko01110,map00592,map01110	-	R07868,R07870	RC01950,RC02104	ko00000,ko00001,ko00199,ko01000	-	-	-	p450
lcl|ORF12_TRINITY_DN70296_c0_g2_i1_1615_140	225117.XP_009347137.1	4.09e-258	718.0	2CMKA@1|root,2QQNS@2759|Eukaryota,37M9T@33090|Viridiplantae,3GG57@35493|Streptophyta,4JHZU@91835|fabids	35493|Streptophyta	Q	Belongs to the cytochrome P450 family	HPL	GO:0003674,GO:0003824,GO:0004497,GO:0005575,GO:0005622,GO:0005623,GO:0005737,GO:0006082,GO:0006629,GO:0006631,GO:0006950,GO:0008150,GO:0008152,GO:0008202,GO:0009507,GO:0009526,GO:0009536,GO:0009611,GO:0009941,GO:0009987,GO:0016125,GO:0016491,GO:0019752,GO:0031967,GO:0031975,GO:0032787,GO:0043226,GO:0043227,GO:0043229,GO:0043231,GO:0043436,GO:0044237,GO:0044238,GO:0044255,GO:0044281,GO:0044422,GO:…	-	ko:K10528	ko00592,ko01110,map00592,map01110	-	R07868,R07870	RC01950,RC02104	ko00000,ko00001,ko00199,ko01000	-	-	-	p450
XP_028071919.1	225117.XP_009347137.1	5.52e-256	713.0	2CMKA@1|root,2QQNS@2759|Eukaryota,37M9T@33090|Viridiplantae,3GG57@35493|Streptophyta,4JHZU@91835|fabids	35493|Streptophyta	Q	Belongs to the cytochrome P450 family	HPL	GO:0003674,GO:0003824,GO:0004497,GO:0005575,GO:0005622,GO:0005623,GO:0005737,GO:0006082,GO:0006629,GO:0006631,GO:0006950,GO:0008150,GO:0008152,GO:0008202,GO:0009507,GO:0009526,GO:0009536,GO:0009611,GO:0009941,GO:0009987,GO:0016125,GO:0016491,GO:0019752,GO:0031967,GO:0031975,GO:0032787,GO:0043226,GO:0043227,GO:0043229,GO:0043231,GO:0043436,GO:0044237,GO:0044238,GO:0044255,GO:0044281,GO:0044422,GO:…	-	ko:K10528	ko00592,ko01110,map00592,map01110	-	R07868,R07870	RC01950,RC02104	ko00000,ko00001,ko00199,ko01000	-	-	-	p450
lcl|ORF10_TRINITY_DN528_c0_g1_i1_1692_205	225117.XP_009347137.1	5.03e-260	723.0	2CMKA@1|root,2QQNS@2759|Eukaryota,37M9T@33090|Viridiplantae,3GG57@35493|Streptophyta,4JHZU@91835|fabids	35493|Streptophyta	Q	Belongs to the cytochrome P450 family	HPL	GO:0003674,GO:0003824,GO:0004497,GO:0005575,GO:0005622,GO:0005623,GO:0005737,GO:0006082,GO:0006629,GO:0006631,GO:0006950,GO:0008150,GO:0008152,GO:0008202,GO:0009507,GO:0009526,GO:0009536,GO:0009611,GO:0009941,GO:0009987,GO:0016125,GO:0016491,GO:0019752,GO:0031967,GO:0031975,GO:0032787,GO:0043226,GO:0043227,GO:0043229,GO:0043231,GO:0043436,GO:0044237,GO:0044238,GO:0044255,GO:0044281,GO:0044422,GO:…	-	ko:K10528	ko00592,ko01110,map00592,map01110	-	R07868,R07870	RC01950,RC02104	ko00000,ko00001,ko00199,ko01000	-	-	-	p450
lcl|ORF10_TRINITY_DN36230_c0_g1_i3_1597_122	225117.XP_009347137.1	2.88e-258	719.0	2CMKA@1|root,2QQNS@2759|Eukaryota,37M9T@33090|Viridiplantae,3GG57@35493|Streptophyta,4JHZU@91835|fabids	35493|Streptophyta	Q	Belongs to the cytochrome P450 family	HPL	GO:0003674,GO:0003824,GO:0004497,GO:0005575,GO:0005622,GO:0005623,GO:0005737,GO:0006082,GO:0006629,GO:0006631,GO:0006950,GO:0008150,GO:0008152,GO:0008202,GO:0009507,GO:0009526,GO:0009536,GO:0009611,GO:0009941,GO:0009987,GO:0016125,GO:0016491,GO:0019752,GO:0031967,GO:0031975,GO:0032787,GO:0043226,GO:0043227,GO:0043229,GO:0043231,GO:0043436,GO:0044237,GO:0044238,GO:0044255,GO:0044281,GO:0044422,GO:…	-	ko:K10528	ko00592,ko01110,map00592,map01110	-	R07868,R07870	RC01950,RC02104	ko00000,ko00001,ko00199,ko01000	-	-	-	p450
lcl|ORF9_TRINITY_DN7047_c0_g1_i3_1616_141	225117.XP_009347137.1	7.83e-256	712.0	2CMKA@1|root,2QQNS@2759|Eukaryota,37M9T@33090|Viridiplantae,3GG57@35493|Streptophyta,4JHZU@91835|fabids	35493|Streptophyta	Q	Belongs to the cytochrome P450 family	HPL	GO:0003674,GO:0003824,GO:0004497,GO:0005575,GO:0005622,GO:0005623,GO:0005737,GO:0006082,GO:0006629,GO:0006631,GO:0006950,GO:0008150,GO:0008152,GO:0008202,GO:0009507,GO:0009526,GO:0009536,GO:0009611,GO:0009941,GO:0009987,GO:0016125,GO:0016491,GO:0019752,GO:0031967,GO:0031975,GO:0032787,GO:0043226,GO:0043227,GO:0043229,GO:0043231,GO:0043436,GO:0044237,GO:0044238,GO:0044255,GO:0044281,GO:0044422,GO:…	-	ko:K10528	ko00592,ko01110,map00592,map01110	-	R07868,R07870	RC01950,RC02104	ko00000,ko00001,ko00199,ko01000	-	-	-	p450
lcl|ORF1_TRINITY_DN1091_c0_g1_i3_93_1568	225117.XP_009347137.1	2.03e-258	719.0	2CMKA@1|root,2QQNS@2759|Eukaryota,37M9T@33090|Viridiplantae,3GG57@35493|Streptophyta,4JHZU@91835|fabids	35493|Streptophyta	Q	Belongs to the cytochrome P450 family	HPL	GO:0003674,GO:0003824,GO:0004497,GO:0005575,GO:0005622,GO:0005623,GO:0005737,GO:0006082,GO:0006629,GO:0006631,GO:0006950,GO:0008150,GO:0008152,GO:0008202,GO:0009507,GO:0009526,GO:0009536,GO:0009611,GO:0009941,GO:0009987,GO:0016125,GO:0016491,GO:0019752,GO:0031967,GO:0031975,GO:0032787,GO:0043226,GO:0043227,GO:0043229,GO:0043231,GO:0043436,GO:0044237,GO:0044238,GO:0044255,GO:0044281,GO:0044422,GO:…	-	ko:K10528	ko00592,ko01110,map00592,map01110	-	R07868,R07870	RC01950,RC02104	ko00000,ko00001,ko00199,ko01000	-	-	-	p450
lcl|ORF9_TRINITY_DN37361_c0_g3_i3_1328_81	102107.XP_008226336.1	4.8e-139	410.0	COG2319@1|root,KOG0646@2759|Eukaryota,37SKE@33090|Viridiplantae,3GH9X@35493|Streptophyta,4JFC8@91835|fabids	35493|Streptophyta	S	Protein ROOT INITIATION DEFECTIVE 3-like	-	-	-	ko:K14829	-	-	-	-	ko00000,ko03009	-	-	-	WD40
lcl|ORF1_TRINITY_DN28308_c0_g1_i2_204_1439	102107.XP_008226336.1	2.73e-137	405.0	COG2319@1|root,KOG0646@2759|Eukaryota,37SKE@33090|Viridiplantae,3GH9X@35493|Streptophyta,4JFC8@91835|fabids	35493|Streptophyta	S	Protein ROOT INITIATION DEFECTIVE 3-like	-	-	-	ko:K14829	-	-	-	-	ko00000,ko03009	-	-	-	WD40
XP_028102975.1	102107.XP_008226336.1	3.9e-143	421.0	COG2319@1|root,KOG0646@2759|Eukaryota,37SKE@33090|Viridiplantae,3GH9X@35493|Streptophyta,4JFC8@91835|fabids	35493|Streptophyta	S	Protein ROOT INITIATION DEFECTIVE 3-like	-	-	-	ko:K14829	-	-	-	-	ko00000,ko03009	-	-	-	WD40
lcl|ORF16_TRINITY_DN10585_c0_g1_i2_2172_874	102107.XP_008226336.1	2.19e-139	412.0	COG2319@1|root,KOG0646@2759|Eukaryota,37SKE@33090|Viridiplantae,3GH9X@35493|Streptophyta,4JFC8@91835|fabids	35493|Streptophyta	S	Protein ROOT INITIATION DEFECTIVE 3-like	-	-	-	ko:K14829	-	-	-	-	ko00000,ko03009	-	-	-	WD40
lcl|ORF13_TRINITY_DN4229_c1_g1_i23_2019_784	102107.XP_008226336.1	1.27e-140	414.0	COG2319@1|root,KOG0646@2759|Eukaryota,37SKE@33090|Viridiplantae,3GH9X@35493|Streptophyta,4JFC8@91835|fabids	35493|Streptophyta	S	Protein ROOT INITIATION DEFECTIVE 3-like	-	-	-	ko:K14829	-	-	-	-	ko00000,ko03009	-	-	-	WD40
lcl|ORF4_TRINITY_DN18590_c0_g1_i9_314_1561	102107.XP_008226336.1	4.8e-139	410.0	COG2319@1|root,KOG0646@2759|Eukaryota,37SKE@33090|Viridiplantae,3GH9X@35493|Streptophyta,4JFC8@91835|fabids	35493|Streptophyta	S	Protein ROOT INITIATION DEFECTIVE 3-like	-	-	-	ko:K14829	-	-	-	-	ko00000,ko03009	-	-	-	WD40
lcl|ORF11_TRINITY_DN31661_c0_g1_i5_1536_289	102107.XP_008226336.1	2.07e-135	401.0	COG2319@1|root,KOG0646@2759|Eukaryota,37SKE@33090|Viridiplantae,3GH9X@35493|Streptophyta,4JFC8@91835|fabids	35493|Streptophyta	S	Protein ROOT INITIATION DEFECTIVE 3-like	-	-	-	ko:K14829	-	-	-	-	ko00000,ko03009	-	-	-	WD40
lcl|ORF7_TRINITY_DN4947_c0_g1_i2_1588_392	29760.VIT_07s0104g01360.t01	1.19e-123	370.0	28MSX@1|root,2QVV7@2759|Eukaryota,37IPW@33090|Viridiplantae,3GFU1@35493|Streptophyta	35493|Streptophyta	K	Zinc finger protein	-	GO:0001067,GO:0003674,GO:0003676,GO:0003677,GO:0003700,GO:0005488,GO:0006355,GO:0008150,GO:0009889,GO:0010468,GO:0010556,GO:0019219,GO:0019222,GO:0031323,GO:0031326,GO:0043565,GO:0044212,GO:0050789,GO:0050794,GO:0051171,GO:0051252,GO:0060255,GO:0065007,GO:0080090,GO:0097159,GO:0140110,GO:1901363,GO:1903506,GO:2000112,GO:2001141	-	-	-	-	-	-	-	-	-	-	CCT,zf-B_box
lcl|ORF6_TRINITY_DN590_c3_g1_i1_1538_342	29760.VIT_07s0104g01360.t01	9.09e-126	375.0	28MSX@1|root,2QVV7@2759|Eukaryota,37IPW@33090|Viridiplantae,3GFU1@35493|Streptophyta	35493|Streptophyta	K	Zinc finger protein	-	GO:0001067,GO:0003674,GO:0003676,GO:0003677,GO:0003700,GO:0005488,GO:0006355,GO:0008150,GO:0009889,GO:0010468,GO:0010556,GO:0019219,GO:0019222,GO:0031323,GO:0031326,GO:0043565,GO:0044212,GO:0050789,GO:0050794,GO:0051171,GO:0051252,GO:0060255,GO:0065007,GO:0080090,GO:0097159,GO:0140110,GO:1901363,GO:1903506,GO:2000112,GO:2001141	-	-	-	-	-	-	-	-	-	-	CCT,zf-B_box
lcl|ORF2_TRINITY_DN5478_c0_g1_i2_271_1467	29760.VIT_07s0104g01360.t01	2.96e-124	371.0	28MSX@1|root,2QVV7@2759|Eukaryota,37IPW@33090|Viridiplantae,3GFU1@35493|Streptophyta	35493|Streptophyta	K	Zinc finger protein	-	GO:0001067,GO:0003674,GO:0003676,GO:0003677,GO:0003700,GO:0005488,GO:0006355,GO:0008150,GO:0009889,GO:0010468,GO:0010556,GO:0019219,GO:0019222,GO:0031323,GO:0031326,GO:0043565,GO:0044212,GO:0050789,GO:0050794,GO:0051171,GO:0051252,GO:0060255,GO:0065007,GO:0080090,GO:0097159,GO:0140110,GO:1901363,GO:1903506,GO:2000112,GO:2001141	-	-	-	-	-	-	-	-	-	-	CCT,zf-B_box
XP_028073891.1	29760.VIT_07s0104g01360.t01	1.29e-125	375.0	28MSX@1|root,2QVV7@2759|Eukaryota,37IPW@33090|Viridiplantae,3GFU1@35493|Streptophyta	35493|Streptophyta	K	Zinc finger protein	-	GO:0001067,GO:0003674,GO:0003676,GO:0003677,GO:0003700,GO:0005488,GO:0006355,GO:0008150,GO:0009889,GO:0010468,GO:0010556,GO:0019219,GO:0019222,GO:0031323,GO:0031326,GO:0043565,GO:0044212,GO:0050789,GO:0050794,GO:0051171,GO:0051252,GO:0060255,GO:0065007,GO:0080090,GO:0097159,GO:0140110,GO:1901363,GO:1903506,GO:2000112,GO:2001141	-	-	-	-	-	-	-	-	-	-	CCT,zf-B_box
lcl|ORF1_TRINITY_DN4955_c1_g1_i2_282_1478	29760.VIT_07s0104g01360.t01	2.79e-127	379.0	28MSX@1|root,2QVV7@2759|Eukaryota,37IPW@33090|Viridiplantae,3GFU1@35493|Streptophyta	35493|Streptophyta	K	Zinc finger protein	-	GO:0001067,GO:0003674,GO:0003676,GO:0003677,GO:0003700,GO:0005488,GO:0006355,GO:0008150,GO:0009889,GO:0010468,GO:0010556,GO:0019219,GO:0019222,GO:0031323,GO:0031326,GO:0043565,GO:0044212,GO:0050789,GO:0050794,GO:0051171,GO:0051252,GO:0060255,GO:0065007,GO:0080090,GO:0097159,GO:0140110,GO:1901363,GO:1903506,GO:2000112,GO:2001141	-	-	-	-	-	-	-	-	-	-	CCT,zf-B_box
lcl|ORF2_TRINITY_DN33533_c0_g1_i1_205_1401	29760.VIT_07s0104g01360.t01	2.59e-125	374.0	28MSX@1|root,2QVV7@2759|Eukaryota,37IPW@33090|Viridiplantae,3GFU1@35493|Streptophyta	35493|Streptophyta	K	Zinc finger protein	-	GO:0001067,GO:0003674,GO:0003676,GO:0003677,GO:0003700,GO:0005488,GO:0006355,GO:0008150,GO:0009889,GO:0010468,GO:0010556,GO:0019219,GO:0019222,GO:0031323,GO:0031326,GO:0043565,GO:0044212,GO:0050789,GO:0050794,GO:0051171,GO:0051252,GO:0060255,GO:0065007,GO:0080090,GO:0097159,GO:0140110,GO:1901363,GO:1903506,GO:2000112,GO:2001141	-	-	-	-	-	-	-	-	-	-	CCT,zf-B_box
lcl|ORF13_TRINITY_DN4910_c1_g1_i4_1596_400	29760.VIT_07s0104g01360.t01	6.42e-126	375.0	28MSX@1|root,2QVV7@2759|Eukaryota,37IPW@33090|Viridiplantae,3GFU1@35493|Streptophyta	35493|Streptophyta	K	Zinc finger protein	-	GO:0001067,GO:0003674,GO:0003676,GO:0003677,GO:0003700,GO:0005488,GO:0006355,GO:0008150,GO:0009889,GO:0010468,GO:0010556,GO:0019219,GO:0019222,GO:0031323,GO:0031326,GO:0043565,GO:0044212,GO:0050789,GO:0050794,GO:0051171,GO:0051252,GO:0060255,GO:0065007,GO:0080090,GO:0097159,GO:0140110,GO:1901363,GO:1903506,GO:2000112,GO:2001141	-	-	-	-	-	-	-	-	-	-	CCT,zf-B_box
lcl|ORF1_TRINITY_DN10646_c0_g2_i1_172_1368	29760.VIT_07s0104g01360.t01	9.09e-126	375.0	28MSX@1|root,2QVV7@2759|Eukaryota,37IPW@33090|Viridiplantae,3GFU1@35493|Streptophyta	35493|Streptophyta	K	Zinc finger protein	-	GO:0001067,GO:0003674,GO:0003676,GO:0003677,GO:0003700,GO:0005488,GO:0006355,GO:0008150,GO:0009889,GO:0010468,GO:0010556,GO:0019219,GO:0019222,GO:0031323,GO:0031326,GO:0043565,GO:0044212,GO:0050789,GO:0050794,GO:0051171,GO:0051252,GO:0060255,GO:0065007,GO:0080090,GO:0097159,GO:0140110,GO:1901363,GO:1903506,GO:2000112,GO:2001141	-	-	-	-	-	-	-	-	-	-	CCT,zf-B_box
lcl|ORF4_TRINITY_DN25421_c0_g1_i1_411_88	102107.XP_008219146.1	7.54e-34	120.0	2CYW8@1|root,2S6UG@2759|Eukaryota,37X1D@33090|Viridiplantae,3GKTK@35493|Streptophyta,4JR0X@91835|fabids	35493|Streptophyta	J	50S ribosomal protein	-	GO:0005575,GO:0005622,GO:0005623,GO:0005737,GO:0009507,GO:0009536,GO:0043226,GO:0043227,GO:0043229,GO:0043231,GO:0044424,GO:0044444,GO:0044464	-	ko:K19035	-	-	-	-	br01610,ko00000,ko03011	-	-	-	DUF5323
lcl|ORF1_TRINITY_DN30037_c0_g1_i1_186_509	102107.XP_008219146.1	7.54e-34	120.0	2CYW8@1|root,2S6UG@2759|Eukaryota,37X1D@33090|Viridiplantae,3GKTK@35493|Streptophyta,4JR0X@91835|fabids	35493|Streptophyta	J	50S ribosomal protein	-	GO:0005575,GO:0005622,GO:0005623,GO:0005737,GO:0009507,GO:0009536,GO:0043226,GO:0043227,GO:0043229,GO:0043231,GO:0044424,GO:0044444,GO:0044464	-	ko:K19035	-	-	-	-	br01610,ko00000,ko03011	-	-	-	DUF5323
lcl|ORF2_TRINITY_DN6504_c0_g1_i1_199_522	102107.XP_008219146.1	3.22e-35	123.0	2CYW8@1|root,2S6UG@2759|Eukaryota,37X1D@33090|Viridiplantae,3GKTK@35493|Streptophyta,4JR0X@91835|fabids	35493|Streptophyta	J	50S ribosomal protein	-	GO:0005575,GO:0005622,GO:0005623,GO:0005737,GO:0009507,GO:0009536,GO:0043226,GO:0043227,GO:0043229,GO:0043231,GO:0044424,GO:0044444,GO:0044464	-	ko:K19035	-	-	-	-	br01610,ko00000,ko03011	-	-	-	DUF5323
XP_028083073.1	102107.XP_008219146.1	7.54e-34	120.0	2CYW8@1|root,2S6UG@2759|Eukaryota,37X1D@33090|Viridiplantae,3GKTK@35493|Streptophyta,4JR0X@91835|fabids	35493|Streptophyta	J	50S ribosomal protein	-	GO:0005575,GO:0005622,GO:0005623,GO:0005737,GO:0009507,GO:0009536,GO:0043226,GO:0043227,GO:0043229,GO:0043231,GO:0044424,GO:0044444,GO:0044464	-	ko:K19035	-	-	-	-	br01610,ko00000,ko03011	-	-	-	DUF5323
lcl|ORF2_TRINITY_DN2905_c0_g1_i1_476_153	3983.cassava4.1_019376m	3.44e-34	121.0	2CYW8@1|root,2S6UG@2759|Eukaryota,37X1D@33090|Viridiplantae,3GKTK@35493|Streptophyta,4JR0X@91835|fabids	35493|Streptophyta	J	50S ribosomal protein	-	GO:0005575,GO:0005622,GO:0005623,GO:0005737,GO:0009507,GO:0009536,GO:0043226,GO:0043227,GO:0043229,GO:0043231,GO:0044424,GO:0044444,GO:0044464	-	ko:K19035	-	-	-	-	br01610,ko00000,ko03011	-	-	-	DUF5323
lcl|ORF1_TRINITY_DN61381_c0_g1_i1_117_440	102107.XP_008219146.1	7.54e-34	120.0	2CYW8@1|root,2S6UG@2759|Eukaryota,37X1D@33090|Viridiplantae,3GKTK@35493|Streptophyta,4JR0X@91835|fabids	35493|Streptophyta	J	50S ribosomal protein	-	GO:0005575,GO:0005622,GO:0005623,GO:0005737,GO:0009507,GO:0009536,GO:0043226,GO:0043227,GO:0043229,GO:0043231,GO:0044424,GO:0044444,GO:0044464	-	ko:K19035	-	-	-	-	br01610,ko00000,ko03011	-	-	-	DUF5323
lcl|ORF4_TRINITY_DN12329_c0_g1_i2_506_183	102107.XP_008219146.1	7.54e-34	120.0	2CYW8@1|root,2S6UG@2759|Eukaryota,37X1D@33090|Viridiplantae,3GKTK@35493|Streptophyta,4JR0X@91835|fabids	35493|Streptophyta	J	50S ribosomal protein	-	GO:0005575,GO:0005622,GO:0005623,GO:0005737,GO:0009507,GO:0009536,GO:0043226,GO:0043227,GO:0043229,GO:0043231,GO:0044424,GO:0044444,GO:0044464	-	ko:K19035	-	-	-	-	br01610,ko00000,ko03011	-	-	-	DUF5323
lcl|ORF4_TRINITY_DN4747_c0_g1_i1_443_120	102107.XP_008219146.1	7.54e-34	120.0	2CYW8@1|root,2S6UG@2759|Eukaryota,37X1D@33090|Viridiplantae,3GKTK@35493|Streptophyta,4JR0X@91835|fabids	35493|Streptophyta	J	50S ribosomal protein	-	GO:0005575,GO:0005622,GO:0005623,GO:0005737,GO:0009507,GO:0009536,GO:0043226,GO:0043227,GO:0043229,GO:0043231,GO:0044424,GO:0044444,GO:0044464	-	ko:K19035	-	-	-	-	br01610,ko00000,ko03011	-	-	-	DUF5323
lcl|ORF8_TRINITY_DN5273_c0_g1_i1_53_1285	3649.evm.model.supercontig_1.394	6.9e-156	452.0	COG0103@1|root,KOG1697@2759|Eukaryota,37HX7@33090|Viridiplantae,3GC8I@35493|Streptophyta,3HRUH@3699|Brassicales	35493|Streptophyta	J	Belongs to the universal ribosomal protein uS9 family	-	GO:0000462,GO:0003674,GO:0003676,GO:0003723,GO:0003735,GO:0005198,GO:0005488,GO:0005575,GO:0005622,GO:0005623,GO:0005737,GO:0005739,GO:0005840,GO:0006139,GO:0006364,GO:0006396,GO:0006412,GO:0006518,GO:0006725,GO:0006807,GO:0007275,GO:0008150,GO:0008152,GO:0009058,GO:0009059,GO:0009553,GO:0009555,GO:0009559,GO:0009561,GO:0009987,GO:0010467,GO:0015935,GO:0016070,GO:0016072,GO:0019538,GO:0022613,GO:…	-	ko:K02996	ko03010,map03010	M00178,M00179	-	-	br01610,ko00000,ko00001,ko00002,ko03011	-	-	-	Ribosomal_S9
lcl|ORF12_TRINITY_DN10061_c0_g1_i2_1717_485	3649.evm.model.supercontig_1.394	3.66e-158	458.0	COG0103@1|root,KOG1697@2759|Eukaryota,37HX7@33090|Viridiplantae,3GC8I@35493|Streptophyta,3HRUH@3699|Brassicales	35493|Streptophyta	J	Belongs to the universal ribosomal protein uS9 family	-	GO:0000462,GO:0003674,GO:0003676,GO:0003723,GO:0003735,GO:0005198,GO:0005488,GO:0005575,GO:0005622,GO:0005623,GO:0005737,GO:0005739,GO:0005840,GO:0006139,GO:0006364,GO:0006396,GO:0006412,GO:0006518,GO:0006725,GO:0006807,GO:0007275,GO:0008150,GO:0008152,GO:0009058,GO:0009059,GO:0009553,GO:0009555,GO:0009559,GO:0009561,GO:0009987,GO:0010467,GO:0015935,GO:0016070,GO:0016072,GO:0019538,GO:0022613,GO:…	-	ko:K02996	ko03010,map03010	M00178,M00179	-	-	br01610,ko00000,ko00001,ko00002,ko03011	-	-	-	Ribosomal_S9
lcl|ORF7_TRINITY_DN11168_c0_g2_i2_83_1315	3649.evm.model.supercontig_1.394	2.79e-155	451.0	COG0103@1|root,KOG1697@2759|Eukaryota,37HX7@33090|Viridiplantae,3GC8I@35493|Streptophyta,3HRUH@3699|Brassicales	35493|Streptophyta	J	Belongs to the universal ribosomal protein uS9 family	-	GO:0000462,GO:0003674,GO:0003676,GO:0003723,GO:0003735,GO:0005198,GO:0005488,GO:0005575,GO:0005622,GO:0005623,GO:0005737,GO:0005739,GO:0005840,GO:0006139,GO:0006364,GO:0006396,GO:0006412,GO:0006518,GO:0006725,GO:0006807,GO:0007275,GO:0008150,GO:0008152,GO:0009058,GO:0009059,GO:0009553,GO:0009555,GO:0009559,GO:0009561,GO:0009987,GO:0010467,GO:0015935,GO:0016070,GO:0016072,GO:0019538,GO:0022613,GO:…	-	ko:K02996	ko03010,map03010	M00178,M00179	-	-	br01610,ko00000,ko00001,ko00002,ko03011	-	-	-	Ribosomal_S9
XP_028097472.1	3649.evm.model.supercontig_1.394	4.86e-156	453.0	COG0103@1|root,KOG1697@2759|Eukaryota,37HX7@33090|Viridiplantae,3GC8I@35493|Streptophyta,3HRUH@3699|Brassicales	35493|Streptophyta	J	Belongs to the universal ribosomal protein uS9 family	-	GO:0000462,GO:0003674,GO:0003676,GO:0003723,GO:0003735,GO:0005198,GO:0005488,GO:0005575,GO:0005622,GO:0005623,GO:0005737,GO:0005739,GO:0005840,GO:0006139,GO:0006364,GO:0006396,GO:0006412,GO:0006518,GO:0006725,GO:0006807,GO:0007275,GO:0008150,GO:0008152,GO:0009058,GO:0009059,GO:0009553,GO:0009555,GO:0009559,GO:0009561,GO:0009987,GO:0010467,GO:0015935,GO:0016070,GO:0016072,GO:0019538,GO:0022613,GO:…	-	ko:K02996	ko03010,map03010	M00178,M00179	-	-	br01610,ko00000,ko00001,ko00002,ko03011	-	-	-	Ribosomal_S9
lcl|ORF7_TRINITY_DN2795_c0_g1_i2_65_1297	3649.evm.model.supercontig_1.394	4.86e-156	453.0	COG0103@1|root,KOG1697@2759|Eukaryota,37HX7@33090|Viridiplantae,3GC8I@35493|Streptophyta,3HRUH@3699|Brassicales	35493|Streptophyta	J	Belongs to the universal ribosomal protein uS9 family	-	GO:0000462,GO:0003674,GO:0003676,GO:0003723,GO:0003735,GO:0005198,GO:0005488,GO:0005575,GO:0005622,GO:0005623,GO:0005737,GO:0005739,GO:0005840,GO:0006139,GO:0006364,GO:0006396,GO:0006412,GO:0006518,GO:0006725,GO:0006807,GO:0007275,GO:0008150,GO:0008152,GO:0009058,GO:0009059,GO:0009553,GO:0009555,GO:0009559,GO:0009561,GO:0009987,GO:0010467,GO:0015935,GO:0016070,GO:0016072,GO:0019538,GO:0022613,GO:…	-	ko:K02996	ko03010,map03010	M00178,M00179	-	-	br01610,ko00000,ko00001,ko00002,ko03011	-	-	-	Ribosomal_S9
lcl|ORF2_TRINITY_DN4557_c0_g1_i9_67_1299	3649.evm.model.supercontig_1.394	1.97e-155	451.0	COG0103@1|root,KOG1697@2759|Eukaryota,37HX7@33090|Viridiplantae,3GC8I@35493|Streptophyta,3HRUH@3699|Brassicales	35493|Streptophyta	J	Belongs to the universal ribosomal protein uS9 family	-	GO:0000462,GO:0003674,GO:0003676,GO:0003723,GO:0003735,GO:0005198,GO:0005488,GO:0005575,GO:0005622,GO:0005623,GO:0005737,GO:0005739,GO:0005840,GO:0006139,GO:0006364,GO:0006396,GO:0006412,GO:0006518,GO:0006725,GO:0006807,GO:0007275,GO:0008150,GO:0008152,GO:0009058,GO:0009059,GO:0009553,GO:0009555,GO:0009559,GO:0009561,GO:0009987,GO:0010467,GO:0015935,GO:0016070,GO:0016072,GO:0019538,GO:0022613,GO:…	-	ko:K02996	ko03010,map03010	M00178,M00179	-	-	br01610,ko00000,ko00001,ko00002,ko03011	-	-	-	Ribosomal_S9
lcl|ORF7_TRINITY_DN7526_c0_g1_i1_53_1285	3649.evm.model.supercontig_1.394	3.17e-159	461.0	COG0103@1|root,KOG1697@2759|Eukaryota,37HX7@33090|Viridiplantae,3GC8I@35493|Streptophyta,3HRUH@3699|Brassicales	35493|Streptophyta	J	Belongs to the universal ribosomal protein uS9 family	-	GO:0000462,GO:0003674,GO:0003676,GO:0003723,GO:0003735,GO:0005198,GO:0005488,GO:0005575,GO:0005622,GO:0005623,GO:0005737,GO:0005739,GO:0005840,GO:0006139,GO:0006364,GO:0006396,GO:0006412,GO:0006518,GO:0006725,GO:0006807,GO:0007275,GO:0008150,GO:0008152,GO:0009058,GO:0009059,GO:0009553,GO:0009555,GO:0009559,GO:0009561,GO:0009987,GO:0010467,GO:0015935,GO:0016070,GO:0016072,GO:0019538,GO:0022613,GO:…	-	ko:K02996	ko03010,map03010	M00178,M00179	-	-	br01610,ko00000,ko00001,ko00002,ko03011	-	-	-	Ribosomal_S9
lcl|ORF11_TRINITY_DN14663_c0_g1_i1_1605_373	3649.evm.model.supercontig_1.394	3.66e-158	458.0	COG0103@1|root,KOG1697@2759|Eukaryota,37HX7@33090|Viridiplantae,3GC8I@35493|Streptophyta,3HRUH@3699|Brassicales	35493|Streptophyta	J	Belongs to the universal ribosomal protein uS9 family	-	GO:0000462,GO:0003674,GO:0003676,GO:0003723,GO:0003735,GO:0005198,GO:0005488,GO:0005575,GO:0005622,GO:0005623,GO:0005737,GO:0005739,GO:0005840,GO:0006139,GO:0006364,GO:0006396,GO:0006412,GO:0006518,GO:0006725,GO:0006807,GO:0007275,GO:0008150,GO:0008152,GO:0009058,GO:0009059,GO:0009553,GO:0009555,GO:0009559,GO:0009561,GO:0009987,GO:0010467,GO:0015935,GO:0016070,GO:0016072,GO:0019538,GO:0022613,GO:…	-	ko:K02996	ko03010,map03010	M00178,M00179	-	-	br01610,ko00000,ko00001,ko00002,ko03011	-	-	-	Ribosomal_S9
lcl|ORF1_TRINITY_DN7380_c0_g1_i1_195_575	4081.Solyc05g006970.2.1	3.75e-15	77.4	28NC2@1|root,2QUXG@2759|Eukaryota,37IDQ@33090|Viridiplantae,3GCZC@35493|Streptophyta,44I3I@71274|asterids	35493|Streptophyta	S	Putative small multi-drug export protein	-	-	-	-	-	-	-	-	-	-	-	-	Sm_multidrug_ex
lcl|ORF9_TRINITY_DN6066_c0_g1_i1_1373_327	3641.EOY00205	3.29e-136	397.0	28NC2@1|root,2QUXG@2759|Eukaryota,37IDQ@33090|Viridiplantae,3GCZC@35493|Streptophyta	35493|Streptophyta	S	Putative small multi-drug export protein	-	-	-	-	-	-	-	-	-	-	-	-	Sm_multidrug_ex
XP_028075726.1	3760.EMJ25322	2.94e-133	389.0	28NC2@1|root,2QUXG@2759|Eukaryota,37IDQ@33090|Viridiplantae,3GCZC@35493|Streptophyta,4JI0R@91835|fabids	35493|Streptophyta	S	Putative small multi-drug export protein	-	-	-	-	-	-	-	-	-	-	-	-	Sm_multidrug_ex
lcl|ORF3_TRINITY_DN4652_c0_g1_i36_2454_3431	3641.EOY00205	1.31e-134	392.0	28NC2@1|root,2QUXG@2759|Eukaryota,37IDQ@33090|Viridiplantae,3GCZC@35493|Streptophyta	35493|Streptophyta	S	Putative small multi-drug export protein	-	-	-	-	-	-	-	-	-	-	-	-	Sm_multidrug_ex
lcl|ORF2_TRINITY_DN5560_c0_g1_i2_183_1250	3750.XP_008339942.1	2.08e-133	390.0	28NC2@1|root,2QUXG@2759|Eukaryota,37IDQ@33090|Viridiplantae,3GCZC@35493|Streptophyta,4JI0R@91835|fabids	35493|Streptophyta	S	Putative small multi-drug export protein	-	-	-	-	-	-	-	-	-	-	-	-	Sm_multidrug_ex
lcl|ORF10_TRINITY_DN62889_c0_g1_i1_1244_273	85681.XP_006438571.1	1.05e-134	392.0	28NC2@1|root,2QUXG@2759|Eukaryota,37IDQ@33090|Viridiplantae,3GCZC@35493|Streptophyta	35493|Streptophyta	S	Putative small multi-drug export protein	-	-	-	-	-	-	-	-	-	-	-	-	Sm_multidrug_ex
lcl|ORF1_TRINITY_DN5544_c0_g1_i16_456_1433	3641.EOY00205	1.86e-134	391.0	28NC2@1|root,2QUXG@2759|Eukaryota,37IDQ@33090|Viridiplantae,3GCZC@35493|Streptophyta	35493|Streptophyta	S	Putative small multi-drug export protein	-	-	-	-	-	-	-	-	-	-	-	-	Sm_multidrug_ex
lcl|ORF4_TRINITY_DN1321_c0_g1_i4_155_463	42345.XP_008807934.1	1.73e-19	87.8	KOG4287@1|root,KOG4287@2759|Eukaryota,37RWV@33090|Viridiplantae,3G7UB@35493|Streptophyta,3KRUU@4447|Liliopsida	35493|Streptophyta	M	Hydrolyzes acetyl esters in homogalacturonan regions of pectin. In type I primary cell wall, galacturonic acid residues of pectin can be acetylated at the O-2 and O-3 positions. Decreasing the degree of acetylation of pectin gels in vitro alters their physical properties	-	GO:0003674,GO:0003824,GO:0005575,GO:0005618,GO:0005623,GO:0008150,GO:0009505,GO:0009987,GO:0016043,GO:0016787,GO:0016788,GO:0030312,GO:0044464,GO:0045229,GO:0052689,GO:0052793,GO:0071554,GO:0071555,GO:0071840,GO:0071944	3.1.1.98	ko:K19882	ko04310,map04310	-	R11202	RC00020,RC00041	ko00000,ko00001,ko01000	-	-	-	PAE
lcl|ORF7_TRINITY_DN2688_c0_g1_i3_898_563	3847.GLYMA18G40150.1	9.18e-25	100.0	KOG4287@1|root,KOG4287@2759|Eukaryota,37RWV@33090|Viridiplantae,3G7UB@35493|Streptophyta	35493|Streptophyta	M	Hydrolyzes acetyl esters in homogalacturonan regions of pectin. In type I primary cell wall, galacturonic acid residues of pectin can be acetylated at the O-2 and O-3 positions. Decreasing the degree of acetylation of pectin gels in vitro alters their physical properties	-	GO:0003674,GO:0003824,GO:0005575,GO:0005618,GO:0005623,GO:0008150,GO:0009505,GO:0009987,GO:0016043,GO:0016787,GO:0016788,GO:0030312,GO:0044464,GO:0045229,GO:0052689,GO:0052793,GO:0071554,GO:0071555,GO:0071840,GO:0071944	3.1.1.98	ko:K19882	ko04310,map04310	-	R11202	RC00020,RC00041	ko00000,ko00001,ko01000	-	-	-	PAE
XP_028103355.1	71139.XP_010070108.1	2.86e-81	252.0	KOG4287@1|root,KOG4287@2759|Eukaryota,37RWV@33090|Viridiplantae,3G7UB@35493|Streptophyta	35493|Streptophyta	M	Hydrolyzes acetyl esters in homogalacturonan regions of pectin. In type I primary cell wall, galacturonic acid residues of pectin can be acetylated at the O-2 and O-3 positions. Decreasing the degree of acetylation of pectin gels in vitro alters their physical properties	-	-	3.1.1.98	ko:K19882	ko04310,map04310	-	R11202	RC00020,RC00041	ko00000,ko00001,ko01000	-	-	-	PAE
lcl|ORF9_TRINITY_DN1367_c0_g1_i32_3000_4091	29760.VIT_18s0001g07200.t01	4.88e-139	406.0	28XKE@1|root,2R77Z@2759|Eukaryota,37S4X@33090|Viridiplantae,3G9DN@35493|Streptophyta	35493|Streptophyta	K	Transcription factor	-	GO:0003674,GO:0003700,GO:0006355,GO:0008150,GO:0009889,GO:0010468,GO:0010556,GO:0019219,GO:0019222,GO:0031323,GO:0031326,GO:0050789,GO:0050794,GO:0051171,GO:0051252,GO:0060255,GO:0065007,GO:0080090,GO:0140110,GO:1903506,GO:2000112,GO:2001141	-	-	-	-	-	-	-	-	-	-	-
lcl|ORF34_TRINITY_DN4_c0_g1_i8_1797_706	29760.VIT_18s0001g07200.t01	3.49e-134	394.0	28XKE@1|root,2R77Z@2759|Eukaryota,37S4X@33090|Viridiplantae,3G9DN@35493|Streptophyta	35493|Streptophyta	K	Transcription factor	-	GO:0003674,GO:0003700,GO:0006355,GO:0008150,GO:0009889,GO:0010468,GO:0010556,GO:0019219,GO:0019222,GO:0031323,GO:0031326,GO:0050789,GO:0050794,GO:0051171,GO:0051252,GO:0060255,GO:0065007,GO:0080090,GO:0140110,GO:1903506,GO:2000112,GO:2001141	-	-	-	-	-	-	-	-	-	-	-
lcl|ORF14_TRINITY_DN791_c0_g1_i1_1795_704	29760.VIT_18s0001g07200.t01	3.97e-138	404.0	28XKE@1|root,2R77Z@2759|Eukaryota,37S4X@33090|Viridiplantae,3G9DN@35493|Streptophyta	35493|Streptophyta	K	Transcription factor	-	GO:0003674,GO:0003700,GO:0006355,GO:0008150,GO:0009889,GO:0010468,GO:0010556,GO:0019219,GO:0019222,GO:0031323,GO:0031326,GO:0050789,GO:0050794,GO:0051171,GO:0051252,GO:0060255,GO:0065007,GO:0080090,GO:0140110,GO:1903506,GO:2000112,GO:2001141	-	-	-	-	-	-	-	-	-	-	-
XP_028078366.1	29760.VIT_18s0001g07200.t01	1.21e-139	408.0	28XKE@1|root,2R77Z@2759|Eukaryota,37S4X@33090|Viridiplantae,3G9DN@35493|Streptophyta	35493|Streptophyta	K	Transcription factor	-	GO:0003674,GO:0003700,GO:0006355,GO:0008150,GO:0009889,GO:0010468,GO:0010556,GO:0019219,GO:0019222,GO:0031323,GO:0031326,GO:0050789,GO:0050794,GO:0051171,GO:0051252,GO:0060255,GO:0065007,GO:0080090,GO:0140110,GO:1903506,GO:2000112,GO:2001141	-	-	-	-	-	-	-	-	-	-	-
lcl|ORF19_TRINITY_DN2090_c3_g1_i14_2756_3847	29760.VIT_18s0001g07200.t01	2.1e-140	410.0	28XKE@1|root,2R77Z@2759|Eukaryota,37S4X@33090|Viridiplantae,3G9DN@35493|Streptophyta	35493|Streptophyta	K	Transcription factor	-	GO:0003674,GO:0003700,GO:0006355,GO:0008150,GO:0009889,GO:0010468,GO:0010556,GO:0019219,GO:0019222,GO:0031323,GO:0031326,GO:0050789,GO:0050794,GO:0051171,GO:0051252,GO:0060255,GO:0065007,GO:0080090,GO:0140110,GO:1903506,GO:2000112,GO:2001141	-	-	-	-	-	-	-	-	-	-	-
lcl|ORF2_TRINITY_DN2917_c1_g2_i1_903_1994	29760.VIT_18s0001g07200.t01	4.23e-140	409.0	28XKE@1|root,2R77Z@2759|Eukaryota,37S4X@33090|Viridiplantae,3G9DN@35493|Streptophyta	35493|Streptophyta	K	Transcription factor	-	GO:0003674,GO:0003700,GO:0006355,GO:0008150,GO:0009889,GO:0010468,GO:0010556,GO:0019219,GO:0019222,GO:0031323,GO:0031326,GO:0050789,GO:0050794,GO:0051171,GO:0051252,GO:0060255,GO:0065007,GO:0080090,GO:0140110,GO:1903506,GO:2000112,GO:2001141	-	-	-	-	-	-	-	-	-	-	-
lcl|ORF17_TRINITY_DN1988_c0_g1_i16_1850_759	29760.VIT_18s0001g07200.t01	4.23e-140	409.0	28XKE@1|root,2R77Z@2759|Eukaryota,37S4X@33090|Viridiplantae,3G9DN@35493|Streptophyta	35493|Streptophyta	K	Transcription factor	-	GO:0003674,GO:0003700,GO:0006355,GO:0008150,GO:0009889,GO:0010468,GO:0010556,GO:0019219,GO:0019222,GO:0031323,GO:0031326,GO:0050789,GO:0050794,GO:0051171,GO:0051252,GO:0060255,GO:0065007,GO:0080090,GO:0140110,GO:1903506,GO:2000112,GO:2001141	-	-	-	-	-	-	-	-	-	-	-
lcl|ORF16_TRINITY_DN14608_c0_g1_i2_1756_665	29760.VIT_18s0001g07200.t01	4.23e-140	409.0	28XKE@1|root,2R77Z@2759|Eukaryota,37S4X@33090|Viridiplantae,3G9DN@35493|Streptophyta	35493|Streptophyta	K	Transcription factor	-	GO:0003674,GO:0003700,GO:0006355,GO:0008150,GO:0009889,GO:0010468,GO:0010556,GO:0019219,GO:0019222,GO:0031323,GO:0031326,GO:0050789,GO:0050794,GO:0051171,GO:0051252,GO:0060255,GO:0065007,GO:0080090,GO:0140110,GO:1903506,GO:2000112,GO:2001141	-	-	-	-	-	-	-	-	-	-	-
lcl|ORF2_TRINITY_DN12692_c0_g1_i1_80_1255	29760.VIT_18s0001g05790.t01	3.18e-216	605.0	28M0T@1|root,2QUDX@2759|Eukaryota,37HGP@33090|Viridiplantae,3GD3W@35493|Streptophyta	35493|Streptophyta	S	protein ROOT PRIMORDIUM DEFECTIVE	-	-	-	-	-	-	-	-	-	-	-	-	PORR
lcl|ORF1_TRINITY_DN4324_c0_g1_i1_55_1230	29760.VIT_18s0001g05790.t01	3.88e-217	607.0	28M0T@1|root,2QUDX@2759|Eukaryota,37HGP@33090|Viridiplantae,3GD3W@35493|Streptophyta	35493|Streptophyta	S	protein ROOT PRIMORDIUM DEFECTIVE	-	-	-	-	-	-	-	-	-	-	-	-	PORR
lcl|ORF8_TRINITY_DN19123_c0_g1_i3_1566_391	29760.VIT_18s0001g05790.t01	3.88e-217	607.0	28M0T@1|root,2QUDX@2759|Eukaryota,37HGP@33090|Viridiplantae,3GD3W@35493|Streptophyta	35493|Streptophyta	S	protein ROOT PRIMORDIUM DEFECTIVE	-	-	-	-	-	-	-	-	-	-	-	-	PORR
XP_028120475.1	29760.VIT_18s0001g05790.t01	1.5e-214	600.0	28M0T@1|root,2QUDX@2759|Eukaryota,37HGP@33090|Viridiplantae,3GD3W@35493|Streptophyta	35493|Streptophyta	S	protein ROOT PRIMORDIUM DEFECTIVE	-	-	-	-	-	-	-	-	-	-	-	-	PORR
lcl|ORF2_TRINITY_DN32018_c0_g1_i2_56_1231	29760.VIT_18s0001g05790.t01	6.72e-218	609.0	28M0T@1|root,2QUDX@2759|Eukaryota,37HGP@33090|Viridiplantae,3GD3W@35493|Streptophyta	35493|Streptophyta	S	protein ROOT PRIMORDIUM DEFECTIVE	-	-	-	-	-	-	-	-	-	-	-	-	PORR
lcl|ORF3_TRINITY_DN32764_c0_g1_i1_71_1246	29760.VIT_18s0001g05790.t01	1.17e-218	611.0	28M0T@1|root,2QUDX@2759|Eukaryota,37HGP@33090|Viridiplantae,3GD3W@35493|Streptophyta	35493|Streptophyta	S	protein ROOT PRIMORDIUM DEFECTIVE	-	-	-	-	-	-	-	-	-	-	-	-	PORR
lcl|ORF2_TRINITY_DN17680_c0_g1_i1_127_1353	29760.VIT_18s0001g05790.t01	5.75e-193	546.0	28M0T@1|root,2QUDX@2759|Eukaryota,37HGP@33090|Viridiplantae,3GD3W@35493|Streptophyta	35493|Streptophyta	S	protein ROOT PRIMORDIUM DEFECTIVE	-	-	-	-	-	-	-	-	-	-	-	-	PORR
lcl|ORF11_TRINITY_DN26273_c0_g1_i1_1583_408	29760.VIT_18s0001g05790.t01	5.78e-219	612.0	28M0T@1|root,2QUDX@2759|Eukaryota,37HGP@33090|Viridiplantae,3GD3W@35493|Streptophyta	35493|Streptophyta	S	protein ROOT PRIMORDIUM DEFECTIVE	-	-	-	-	-	-	-	-	-	-	-	-	PORR
XP_028070715.1	3694.POPTR_0018s06330.1	6.73e-45	149.0	COG1836@1|root,KOG4491@2759|Eukaryota,37RCY@33090|Viridiplantae,3GBIC@35493|Streptophyta,4JG2J@91835|fabids	35493|Streptophyta	S	Transmembrane protein 19-like	-	GO:0005575,GO:0016020	-	-	-	-	-	-	-	-	-	-	DUF92
lcl|ORF7_TRINITY_DN21033_c0_g1_i2_720_151	3641.EOY16253	7.51e-118	338.0	COG3703@1|root,KOG3182@2759|Eukaryota,37SVU@33090|Viridiplantae,3GA9U@35493|Streptophyta	35493|Streptophyta	P	Catalyzes the formation of 5-oxoproline from gamma- glutamyl dipeptides and plays a significant role in glutathione (GSH) homeostasis	-	GO:0003674,GO:0003824,GO:0003839,GO:0005575,GO:0005622,GO:0005623,GO:0005737,GO:0005829,GO:0006518,GO:0006575,GO:0006749,GO:0006751,GO:0006790,GO:0006807,GO:0008150,GO:0008152,GO:0009056,GO:0009987,GO:0016829,GO:0016840,GO:0016842,GO:0034641,GO:0042219,GO:0043171,GO:0043603,GO:0044237,GO:0044248,GO:0044273,GO:0044424,GO:0044444,GO:0044464,GO:0051186,GO:0051187,GO:0071704,GO:1901564,GO:1901565,GO:…	-	ko:K07232	-	-	-	-	ko00000	-	-	-	ChaC
lcl|ORF7_TRINITY_DN38596_c0_g1_i1_706_137	3641.EOY16253	7.51e-118	338.0	COG3703@1|root,KOG3182@2759|Eukaryota,37SVU@33090|Viridiplantae,3GA9U@35493|Streptophyta	35493|Streptophyta	P	Catalyzes the formation of 5-oxoproline from gamma- glutamyl dipeptides and plays a significant role in glutathione (GSH) homeostasis	-	GO:0003674,GO:0003824,GO:0003839,GO:0005575,GO:0005622,GO:0005623,GO:0005737,GO:0005829,GO:0006518,GO:0006575,GO:0006749,GO:0006751,GO:0006790,GO:0006807,GO:0008150,GO:0008152,GO:0009056,GO:0009987,GO:0016829,GO:0016840,GO:0016842,GO:0034641,GO:0042219,GO:0043171,GO:0043603,GO:0044237,GO:0044248,GO:0044273,GO:0044424,GO:0044444,GO:0044464,GO:0051186,GO:0051187,GO:0071704,GO:1901564,GO:1901565,GO:…	-	ko:K07232	-	-	-	-	ko00000	-	-	-	ChaC
lcl|ORF6_TRINITY_DN9709_c0_g2_i2_428_192	29760.VIT_18s0001g03150.t01	1.52e-38	133.0	COG3703@1|root,KOG3182@2759|Eukaryota,37SVU@33090|Viridiplantae,3GA9U@35493|Streptophyta	35493|Streptophyta	P	Catalyzes the formation of 5-oxoproline from gamma- glutamyl dipeptides and plays a significant role in glutathione (GSH) homeostasis	-	GO:0003674,GO:0003824,GO:0003839,GO:0005575,GO:0005622,GO:0005623,GO:0005737,GO:0005829,GO:0006518,GO:0006575,GO:0006749,GO:0006751,GO:0006790,GO:0006807,GO:0008150,GO:0008152,GO:0009056,GO:0009987,GO:0016829,GO:0016840,GO:0016842,GO:0034641,GO:0042219,GO:0043171,GO:0043603,GO:0044237,GO:0044248,GO:0044273,GO:0044424,GO:0044444,GO:0044464,GO:0051186,GO:0051187,GO:0071704,GO:1901564,GO:1901565,GO:…	-	ko:K07232	-	-	-	-	ko00000	-	-	-	ChaC
XP_028085110.1	3641.EOY16253	7.51e-118	338.0	COG3703@1|root,KOG3182@2759|Eukaryota,37SVU@33090|Viridiplantae,3GA9U@35493|Streptophyta	35493|Streptophyta	P	Catalyzes the formation of 5-oxoproline from gamma- glutamyl dipeptides and plays a significant role in glutathione (GSH) homeostasis	-	GO:0003674,GO:0003824,GO:0003839,GO:0005575,GO:0005622,GO:0005623,GO:0005737,GO:0005829,GO:0006518,GO:0006575,GO:0006749,GO:0006751,GO:0006790,GO:0006807,GO:0008150,GO:0008152,GO:0009056,GO:0009987,GO:0016829,GO:0016840,GO:0016842,GO:0034641,GO:0042219,GO:0043171,GO:0043603,GO:0044237,GO:0044248,GO:0044273,GO:0044424,GO:0044444,GO:0044464,GO:0051186,GO:0051187,GO:0071704,GO:1901564,GO:1901565,GO:…	-	ko:K07232	-	-	-	-	ko00000	-	-	-	ChaC
lcl|ORF1_TRINITY_DN80618_c0_g1_i1_117_626	3641.EOY16253	8.77e-112	322.0	COG3703@1|root,KOG3182@2759|Eukaryota,37SVU@33090|Viridiplantae,3GA9U@35493|Streptophyta	35493|Streptophyta	P	Catalyzes the formation of 5-oxoproline from gamma- glutamyl dipeptides and plays a significant role in glutathione (GSH) homeostasis	-	GO:0003674,GO:0003824,GO:0003839,GO:0005575,GO:0005622,GO:0005623,GO:0005737,GO:0005829,GO:0006518,GO:0006575,GO:0006749,GO:0006751,GO:0006790,GO:0006807,GO:0008150,GO:0008152,GO:0009056,GO:0009987,GO:0016829,GO:0016840,GO:0016842,GO:0034641,GO:0042219,GO:0043171,GO:0043603,GO:0044237,GO:0044248,GO:0044273,GO:0044424,GO:0044444,GO:0044464,GO:0051186,GO:0051187,GO:0071704,GO:1901564,GO:1901565,GO:…	-	ko:K07232	-	-	-	-	ko00000	-	-	-	ChaC
lcl|ORF1_TRINITY_DN28407_c0_g1_i2_169_738	3641.EOY16253	1.52e-117	338.0	COG3703@1|root,KOG3182@2759|Eukaryota,37SVU@33090|Viridiplantae,3GA9U@35493|Streptophyta	35493|Streptophyta	P	Catalyzes the formation of 5-oxoproline from gamma- glutamyl dipeptides and plays a significant role in glutathione (GSH) homeostasis	-	GO:0003674,GO:0003824,GO:0003839,GO:0005575,GO:0005622,GO:0005623,GO:0005737,GO:0005829,GO:0006518,GO:0006575,GO:0006749,GO:0006751,GO:0006790,GO:0006807,GO:0008150,GO:0008152,GO:0009056,GO:0009987,GO:0016829,GO:0016840,GO:0016842,GO:0034641,GO:0042219,GO:0043171,GO:0043603,GO:0044237,GO:0044248,GO:0044273,GO:0044424,GO:0044444,GO:0044464,GO:0051186,GO:0051187,GO:0071704,GO:1901564,GO:1901565,GO:…	-	ko:K07232	-	-	-	-	ko00000	-	-	-	ChaC
lcl|ORF9_TRINITY_DN8443_c0_g1_i2_424_188	29760.VIT_18s0001g03150.t01	1.52e-38	133.0	COG3703@1|root,KOG3182@2759|Eukaryota,37SVU@33090|Viridiplantae,3GA9U@35493|Streptophyta	35493|Streptophyta	P	Catalyzes the formation of 5-oxoproline from gamma- glutamyl dipeptides and plays a significant role in glutathione (GSH) homeostasis	-	GO:0003674,GO:0003824,GO:0003839,GO:0005575,GO:0005622,GO:0005623,GO:0005737,GO:0005829,GO:0006518,GO:0006575,GO:0006749,GO:0006751,GO:0006790,GO:0006807,GO:0008150,GO:0008152,GO:0009056,GO:0009987,GO:0016829,GO:0016840,GO:0016842,GO:0034641,GO:0042219,GO:0043171,GO:0043603,GO:0044237,GO:0044248,GO:0044273,GO:0044424,GO:0044444,GO:0044464,GO:0051186,GO:0051187,GO:0071704,GO:1901564,GO:1901565,GO:…	-	ko:K07232	-	-	-	-	ko00000	-	-	-	ChaC
lcl|ORF1_TRINITY_DN48029_c0_g1_i1_139_708	3641.EOY16253	1.52e-117	338.0	COG3703@1|root,KOG3182@2759|Eukaryota,37SVU@33090|Viridiplantae,3GA9U@35493|Streptophyta	35493|Streptophyta	P	Catalyzes the formation of 5-oxoproline from gamma- glutamyl dipeptides and plays a significant role in glutathione (GSH) homeostasis	-	GO:0003674,GO:0003824,GO:0003839,GO:0005575,GO:0005622,GO:0005623,GO:0005737,GO:0005829,GO:0006518,GO:0006575,GO:0006749,GO:0006751,GO:0006790,GO:0006807,GO:0008150,GO:0008152,GO:0009056,GO:0009987,GO:0016829,GO:0016840,GO:0016842,GO:0034641,GO:0042219,GO:0043171,GO:0043603,GO:0044237,GO:0044248,GO:0044273,GO:0044424,GO:0044444,GO:0044464,GO:0051186,GO:0051187,GO:0071704,GO:1901564,GO:1901565,GO:…	-	ko:K07232	-	-	-	-	ko00000	-	-	-	ChaC
lcl|ORF11_TRINITY_DN2476_c0_g1_i1_1820_384	3649.evm.TU.contig_27573.2	8.15e-201	572.0	KOG2699@1|root,KOG2699@2759|Eukaryota,37HNQ@33090|Viridiplantae,3GACD@35493|Streptophyta,3HNSK@3699|Brassicales	35493|Streptophyta	O	UBX domain-containing protein	-	GO:0000323,GO:0005575,GO:0005622,GO:0005623,GO:0005737,GO:0005764,GO:0005765,GO:0005768,GO:0005769,GO:0005770,GO:0005773,GO:0005774,GO:0005829,GO:0006508,GO:0006807,GO:0006810,GO:0006914,GO:0006950,GO:0006952,GO:0007034,GO:0007041,GO:0008150,GO:0008152,GO:0008333,GO:0009056,GO:0009057,GO:0009605,GO:0009607,GO:0009620,GO:0009987,GO:0010008,GO:0010033,GO:0010243,GO:0010498,GO:0012505,GO:0016020,GO:…	-	ko:K14011	ko04141,map04141	-	-	-	ko00000,ko00001	-	-	-	PUB,UBX
lcl|ORF1_TRINITY_DN5590_c1_g2_i1_297_1733	3649.evm.TU.contig_27573.2	5.4e-199	568.0	KOG2699@1|root,KOG2699@2759|Eukaryota,37HNQ@33090|Viridiplantae,3GACD@35493|Streptophyta,3HNSK@3699|Brassicales	35493|Streptophyta	O	UBX domain-containing protein	-	GO:0000323,GO:0005575,GO:0005622,GO:0005623,GO:0005737,GO:0005764,GO:0005765,GO:0005768,GO:0005769,GO:0005770,GO:0005773,GO:0005774,GO:0005829,GO:0006508,GO:0006807,GO:0006810,GO:0006914,GO:0006950,GO:0006952,GO:0007034,GO:0007041,GO:0008150,GO:0008152,GO:0008333,GO:0009056,GO:0009057,GO:0009605,GO:0009607,GO:0009620,GO:0009987,GO:0010008,GO:0010033,GO:0010243,GO:0010498,GO:0012505,GO:0016020,GO:…	-	ko:K14011	ko04141,map04141	-	-	-	ko00000,ko00001	-	-	-	PUB,UBX
lcl|ORF1_TRINITY_DN14935_c1_g1_i3_310_1746	3649.evm.TU.contig_27573.2	1.26e-197	564.0	KOG2699@1|root,KOG2699@2759|Eukaryota,37HNQ@33090|Viridiplantae,3GACD@35493|Streptophyta,3HNSK@3699|Brassicales	35493|Streptophyta	O	UBX domain-containing protein	-	GO:0000323,GO:0005575,GO:0005622,GO:0005623,GO:0005737,GO:0005764,GO:0005765,GO:0005768,GO:0005769,GO:0005770,GO:0005773,GO:0005774,GO:0005829,GO:0006508,GO:0006807,GO:0006810,GO:0006914,GO:0006950,GO:0006952,GO:0007034,GO:0007041,GO:0008150,GO:0008152,GO:0008333,GO:0009056,GO:0009057,GO:0009605,GO:0009607,GO:0009620,GO:0009987,GO:0010008,GO:0010033,GO:0010243,GO:0010498,GO:0012505,GO:0016020,GO:…	-	ko:K14011	ko04141,map04141	-	-	-	ko00000,ko00001	-	-	-	PUB,UBX
XP_028120076.1	4432.XP_010271316.1	1.2e-198	566.0	KOG2699@1|root,KOG2699@2759|Eukaryota,37HNQ@33090|Viridiplantae,3GACD@35493|Streptophyta	35493|Streptophyta	O	UBX domain-containing protein	-	GO:0000323,GO:0005575,GO:0005622,GO:0005623,GO:0005737,GO:0005764,GO:0005765,GO:0005768,GO:0005769,GO:0005770,GO:0005773,GO:0005774,GO:0005829,GO:0006508,GO:0006807,GO:0006810,GO:0006914,GO:0006950,GO:0006952,GO:0007034,GO:0007041,GO:0008150,GO:0008152,GO:0008333,GO:0009056,GO:0009057,GO:0009605,GO:0009607,GO:0009620,GO:0009987,GO:0010008,GO:0010033,GO:0010243,GO:0010498,GO:0012505,GO:0016020,GO:…	-	ko:K14011	ko04141,map04141	-	-	-	ko00000,ko00001	-	-	-	PUB,UBX
lcl|ORF1_TRINITY_DN14936_c0_g1_i1_294_1730	4432.XP_010271316.1	4.87e-198	565.0	KOG2699@1|root,KOG2699@2759|Eukaryota,37HNQ@33090|Viridiplantae,3GACD@35493|Streptophyta	35493|Streptophyta	O	UBX domain-containing protein	-	GO:0000323,GO:0005575,GO:0005622,GO:0005623,GO:0005737,GO:0005764,GO:0005765,GO:0005768,GO:0005769,GO:0005770,GO:0005773,GO:0005774,GO:0005829,GO:0006508,GO:0006807,GO:0006810,GO:0006914,GO:0006950,GO:0006952,GO:0007034,GO:0007041,GO:0008150,GO:0008152,GO:0008333,GO:0009056,GO:0009057,GO:0009605,GO:0009607,GO:0009620,GO:0009987,GO:0010008,GO:0010033,GO:0010243,GO:0010498,GO:0012505,GO:0016020,GO:…	-	ko:K14011	ko04141,map04141	-	-	-	ko00000,ko00001	-	-	-	PUB,UBX
lcl|ORF11_TRINITY_DN37360_c0_g1_i1_1651_215	3649.evm.TU.contig_27573.2	6.24e-198	565.0	KOG2699@1|root,KOG2699@2759|Eukaryota,37HNQ@33090|Viridiplantae,3GACD@35493|Streptophyta,3HNSK@3699|Brassicales	35493|Streptophyta	O	UBX domain-containing protein	-	GO:0000323,GO:0005575,GO:0005622,GO:0005623,GO:0005737,GO:0005764,GO:0005765,GO:0005768,GO:0005769,GO:0005770,GO:0005773,GO:0005774,GO:0005829,GO:0006508,GO:0006807,GO:0006810,GO:0006914,GO:0006950,GO:0006952,GO:0007034,GO:0007041,GO:0008150,GO:0008152,GO:0008333,GO:0009056,GO:0009057,GO:0009605,GO:0009607,GO:0009620,GO:0009987,GO:0010008,GO:0010033,GO:0010243,GO:0010498,GO:0012505,GO:0016020,GO:…	-	ko:K14011	ko04141,map04141	-	-	-	ko00000,ko00001	-	-	-	PUB,UBX
lcl|ORF10_TRINITY_DN10160_c0_g1_i1_1646_210	3649.evm.TU.contig_27573.2	6.24e-198	565.0	KOG2699@1|root,KOG2699@2759|Eukaryota,37HNQ@33090|Viridiplantae,3GACD@35493|Streptophyta,3HNSK@3699|Brassicales	35493|Streptophyta	O	UBX domain-containing protein	-	GO:0000323,GO:0005575,GO:0005622,GO:0005623,GO:0005737,GO:0005764,GO:0005765,GO:0005768,GO:0005769,GO:0005770,GO:0005773,GO:0005774,GO:0005829,GO:0006508,GO:0006807,GO:0006810,GO:0006914,GO:0006950,GO:0006952,GO:0007034,GO:0007041,GO:0008150,GO:0008152,GO:0008333,GO:0009056,GO:0009057,GO:0009605,GO:0009607,GO:0009620,GO:0009987,GO:0010008,GO:0010033,GO:0010243,GO:0010498,GO:0012505,GO:0016020,GO:…	-	ko:K14011	ko04141,map04141	-	-	-	ko00000,ko00001	-	-	-	PUB,UBX
lcl|ORF9_TRINITY_DN65409_c0_g1_i1_1590_154	3649.evm.TU.contig_27573.2	6.24e-198	565.0	KOG2699@1|root,KOG2699@2759|Eukaryota,37HNQ@33090|Viridiplantae,3GACD@35493|Streptophyta,3HNSK@3699|Brassicales	35493|Streptophyta	O	UBX domain-containing protein	-	GO:0000323,GO:0005575,GO:0005622,GO:0005623,GO:0005737,GO:0005764,GO:0005765,GO:0005768,GO:0005769,GO:0005770,GO:0005773,GO:0005774,GO:0005829,GO:0006508,GO:0006807,GO:0006810,GO:0006914,GO:0006950,GO:0006952,GO:0007034,GO:0007041,GO:0008150,GO:0008152,GO:0008333,GO:0009056,GO:0009057,GO:0009605,GO:0009607,GO:0009620,GO:0009987,GO:0010008,GO:0010033,GO:0010243,GO:0010498,GO:0012505,GO:0016020,GO:…	-	ko:K14011	ko04141,map04141	-	-	-	ko00000,ko00001	-	-	-	PUB,UBX
lcl|ORF4_TRINITY_DN2496_c0_g1_i1_164_1483	4432.XP_010271530.1	5.29e-232	648.0	COG4870@1|root,KOG4296@1|root,KOG1543@2759|Eukaryota,KOG4296@2759|Eukaryota,37J4A@33090|Viridiplantae,3G88V@35493|Streptophyta	35493|Streptophyta	O	Belongs to the peptidase C1 family	-	GO:0000323,GO:0003674,GO:0003824,GO:0004175,GO:0004197,GO:0005575,GO:0005576,GO:0005615,GO:0005622,GO:0005623,GO:0005737,GO:0005764,GO:0005773,GO:0006508,GO:0006807,GO:0008150,GO:0008152,GO:0008233,GO:0008234,GO:0009056,GO:0009057,GO:0009987,GO:0016787,GO:0019538,GO:0030163,GO:0043170,GO:0043226,GO:0043227,GO:0043229,GO:0043231,GO:0044237,GO:0044238,GO:0044248,GO:0044257,GO:0044260,GO:0044265,GO:…	3.4.22.15	ko:K01365	ko04140,ko04142,ko04145,ko04210,ko04612,ko05205,ko05323,ko05418,map04140,map04142,map04145,map04210,map04612,map05205,map05323,map05418	-	-	-	ko00000,ko00001,ko00537,ko01000,ko01002,ko03110	-	-	-	Granulin,Inhibitor_I29,Peptidase_C1
lcl|ORF6_TRINITY_DN10679_c0_g1_i2_1613_294	4432.XP_010271530.1	7.52e-232	648.0	COG4870@1|root,KOG4296@1|root,KOG1543@2759|Eukaryota,KOG4296@2759|Eukaryota,37J4A@33090|Viridiplantae,3G88V@35493|Streptophyta	35493|Streptophyta	O	Belongs to the peptidase C1 family	-	GO:0000323,GO:0003674,GO:0003824,GO:0004175,GO:0004197,GO:0005575,GO:0005576,GO:0005615,GO:0005622,GO:0005623,GO:0005737,GO:0005764,GO:0005773,GO:0006508,GO:0006807,GO:0008150,GO:0008152,GO:0008233,GO:0008234,GO:0009056,GO:0009057,GO:0009987,GO:0016787,GO:0019538,GO:0030163,GO:0043170,GO:0043226,GO:0043227,GO:0043229,GO:0043231,GO:0044237,GO:0044238,GO:0044248,GO:0044257,GO:0044260,GO:0044265,GO:…	3.4.22.15	ko:K01365	ko04140,ko04142,ko04145,ko04210,ko04612,ko05205,ko05323,ko05418,map04140,map04142,map04145,map04210,map04612,map05205,map05323,map05418	-	-	-	ko00000,ko00001,ko00537,ko01000,ko01002,ko03110	-	-	-	Granulin,Inhibitor_I29,Peptidase_C1
lcl|ORF1_TRINITY_DN5238_c0_g1_i25_354_1163	3656.XP_008444761.1	2.68e-129	380.0	COG4870@1|root,KOG4296@1|root,KOG1543@2759|Eukaryota,KOG4296@2759|Eukaryota,37J4A@33090|Viridiplantae,3G88V@35493|Streptophyta,4JDBI@91835|fabids	35493|Streptophyta	O	Belongs to the peptidase C1 family	-	GO:0000323,GO:0003674,GO:0003824,GO:0004175,GO:0004197,GO:0005575,GO:0005576,GO:0005615,GO:0005622,GO:0005623,GO:0005737,GO:0005764,GO:0005773,GO:0006508,GO:0006807,GO:0008150,GO:0008152,GO:0008233,GO:0008234,GO:0009056,GO:0009057,GO:0009987,GO:0016787,GO:0019538,GO:0030163,GO:0043170,GO:0043226,GO:0043227,GO:0043229,GO:0043231,GO:0044237,GO:0044238,GO:0044248,GO:0044257,GO:0044260,GO:0044265,GO:…	3.4.22.15	ko:K01365	ko04140,ko04142,ko04145,ko04210,ko04612,ko05205,ko05323,ko05418,map04140,map04142,map04145,map04210,map04612,map05205,map05323,map05418	-	-	-	ko00000,ko00001,ko00537,ko01000,ko01002,ko03110	-	-	-	Granulin,Inhibitor_I29,Peptidase_C1
XP_028079109.1	4432.XP_010271530.1	1.12e-233	652.0	COG4870@1|root,KOG4296@1|root,KOG1543@2759|Eukaryota,KOG4296@2759|Eukaryota,37J4A@33090|Viridiplantae,3G88V@35493|Streptophyta	35493|Streptophyta	O	Belongs to the peptidase C1 family	-	GO:0000323,GO:0003674,GO:0003824,GO:0004175,GO:0004197,GO:0005575,GO:0005576,GO:0005615,GO:0005622,GO:0005623,GO:0005737,GO:0005764,GO:0005773,GO:0006508,GO:0006807,GO:0008150,GO:0008152,GO:0008233,GO:0008234,GO:0009056,GO:0009057,GO:0009987,GO:0016787,GO:0019538,GO:0030163,GO:0043170,GO:0043226,GO:0043227,GO:0043229,GO:0043231,GO:0044237,GO:0044238,GO:0044248,GO:0044257,GO:0044260,GO:0044265,GO:…	3.4.22.15	ko:K01365	ko04140,ko04142,ko04145,ko04210,ko04612,ko05205,ko05323,ko05418,map04140,map04142,map04145,map04210,map04612,map05205,map05323,map05418	-	-	-	ko00000,ko00001,ko00537,ko01000,ko01002,ko03110	-	-	-	Granulin,Inhibitor_I29,Peptidase_C1
lcl|ORF4_TRINITY_DN12753_c0_g1_i2_304_1623	4432.XP_010271530.1	6.8e-235	655.0	COG4870@1|root,KOG4296@1|root,KOG1543@2759|Eukaryota,KOG4296@2759|Eukaryota,37J4A@33090|Viridiplantae,3G88V@35493|Streptophyta	35493|Streptophyta	O	Belongs to the peptidase C1 family	-	GO:0000323,GO:0003674,GO:0003824,GO:0004175,GO:0004197,GO:0005575,GO:0005576,GO:0005615,GO:0005622,GO:0005623,GO:0005737,GO:0005764,GO:0005773,GO:0006508,GO:0006807,GO:0008150,GO:0008152,GO:0008233,GO:0008234,GO:0009056,GO:0009057,GO:0009987,GO:0016787,GO:0019538,GO:0030163,GO:0043170,GO:0043226,GO:0043227,GO:0043229,GO:0043231,GO:0044237,GO:0044238,GO:0044248,GO:0044257,GO:0044260,GO:0044265,GO:…	3.4.22.15	ko:K01365	ko04140,ko04142,ko04145,ko04210,ko04612,ko05205,ko05323,ko05418,map04140,map04142,map04145,map04210,map04612,map05205,map05323,map05418	-	-	-	ko00000,ko00001,ko00537,ko01000,ko01002,ko03110	-	-	-	Granulin,Inhibitor_I29,Peptidase_C1
lcl|ORF4_TRINITY_DN16641_c0_g1_i2_1507_188	4432.XP_010271530.1	5.57e-234	653.0	COG4870@1|root,KOG4296@1|root,KOG1543@2759|Eukaryota,KOG4296@2759|Eukaryota,37J4A@33090|Viridiplantae,3G88V@35493|Streptophyta	35493|Streptophyta	O	Belongs to the peptidase C1 family	-	GO:0000323,GO:0003674,GO:0003824,GO:0004175,GO:0004197,GO:0005575,GO:0005576,GO:0005615,GO:0005622,GO:0005623,GO:0005737,GO:0005764,GO:0005773,GO:0006508,GO:0006807,GO:0008150,GO:0008152,GO:0008233,GO:0008234,GO:0009056,GO:0009057,GO:0009987,GO:0016787,GO:0019538,GO:0030163,GO:0043170,GO:0043226,GO:0043227,GO:0043229,GO:0043231,GO:0044237,GO:0044238,GO:0044248,GO:0044257,GO:0044260,GO:0044265,GO:…	3.4.22.15	ko:K01365	ko04140,ko04142,ko04145,ko04210,ko04612,ko05205,ko05323,ko05418,map04140,map04142,map04145,map04210,map04612,map05205,map05323,map05418	-	-	-	ko00000,ko00001,ko00537,ko01000,ko01002,ko03110	-	-	-	Granulin,Inhibitor_I29,Peptidase_C1
lcl|ORF6_TRINITY_DN3794_c0_g1_i3_1851_532	4432.XP_010271530.1	6.8e-235	655.0	COG4870@1|root,KOG4296@1|root,KOG1543@2759|Eukaryota,KOG4296@2759|Eukaryota,37J4A@33090|Viridiplantae,3G88V@35493|Streptophyta	35493|Streptophyta	O	Belongs to the peptidase C1 family	-	GO:0000323,GO:0003674,GO:0003824,GO:0004175,GO:0004197,GO:0005575,GO:0005576,GO:0005615,GO:0005622,GO:0005623,GO:0005737,GO:0005764,GO:0005773,GO:0006508,GO:0006807,GO:0008150,GO:0008152,GO:0008233,GO:0008234,GO:0009056,GO:0009057,GO:0009987,GO:0016787,GO:0019538,GO:0030163,GO:0043170,GO:0043226,GO:0043227,GO:0043229,GO:0043231,GO:0044237,GO:0044238,GO:0044248,GO:0044257,GO:0044260,GO:0044265,GO:…	3.4.22.15	ko:K01365	ko04140,ko04142,ko04145,ko04210,ko04612,ko05205,ko05323,ko05418,map04140,map04142,map04145,map04210,map04612,map05205,map05323,map05418	-	-	-	ko00000,ko00001,ko00537,ko01000,ko01002,ko03110	-	-	-	Granulin,Inhibitor_I29,Peptidase_C1
lcl|ORF1_TRINITY_DN9076_c0_g1_i1_141_1460	4432.XP_010271530.1	1.3e-232	650.0	COG4870@1|root,KOG4296@1|root,KOG1543@2759|Eukaryota,KOG4296@2759|Eukaryota,37J4A@33090|Viridiplantae,3G88V@35493|Streptophyta	35493|Streptophyta	O	Belongs to the peptidase C1 family	-	GO:0000323,GO:0003674,GO:0003824,GO:0004175,GO:0004197,GO:0005575,GO:0005576,GO:0005615,GO:0005622,GO:0005623,GO:0005737,GO:0005764,GO:0005773,GO:0006508,GO:0006807,GO:0008150,GO:0008152,GO:0008233,GO:0008234,GO:0009056,GO:0009057,GO:0009987,GO:0016787,GO:0019538,GO:0030163,GO:0043170,GO:0043226,GO:0043227,GO:0043229,GO:0043231,GO:0044237,GO:0044238,GO:0044248,GO:0044257,GO:0044260,GO:0044265,GO:…	3.4.22.15	ko:K01365	ko04140,ko04142,ko04145,ko04210,ko04612,ko05205,ko05323,ko05418,map04140,map04142,map04145,map04210,map04612,map05205,map05323,map05418	-	-	-	ko00000,ko00001,ko00537,ko01000,ko01002,ko03110	-	-	-	Granulin,Inhibitor_I29,Peptidase_C1
XP_028072085.1	3641.EOY32054	3.86e-22	99.0	28PTJ@1|root,2QWG4@2759|Eukaryota,37T0S@33090|Viridiplantae,3GGZW@35493|Streptophyta	35493|Streptophyta	K	Transcription factor	-	GO:0003674,GO:0003700,GO:0006355,GO:0008150,GO:0009889,GO:0010468,GO:0010556,GO:0019219,GO:0019222,GO:0031323,GO:0031326,GO:0050789,GO:0050794,GO:0051171,GO:0051252,GO:0060255,GO:0065007,GO:0080090,GO:0140110,GO:1903506,GO:2000112,GO:2001141	-	-	-	-	-	-	-	-	-	-	HLH
lcl|ORF5_TRINITY_DN2446_c0_g1_i1_50_742	2711.XP_006490239.1	5.11e-120	347.0	KOG3238@1|root,KOG3238@2759|Eukaryota,37T44@33090|Viridiplantae,3GF2N@35493|Streptophyta	35493|Streptophyta	P	Chloride conductance regulatory protein	-	-	-	ko:K05019	ko03013,map03013	-	-	-	ko00000,ko00001,ko04040	1.A.47	-	-	Voldacs
lcl|ORF5_TRINITY_DN8421_c0_g1_i1_1092_400	3641.EOY22946	2.05e-120	348.0	KOG3238@1|root,KOG3238@2759|Eukaryota,37T44@33090|Viridiplantae,3GF2N@35493|Streptophyta	35493|Streptophyta	P	Chloride conductance regulatory protein	-	-	-	ko:K05019	ko03013,map03013	-	-	-	ko00000,ko00001,ko04040	1.A.47	-	-	Voldacs
lcl|ORF1_TRINITY_DN2329_c0_g1_i4_51_743	3641.EOY22946	3.39e-119	345.0	KOG3238@1|root,KOG3238@2759|Eukaryota,37T44@33090|Viridiplantae,3GF2N@35493|Streptophyta	35493|Streptophyta	P	Chloride conductance regulatory protein	-	-	-	ko:K05019	ko03013,map03013	-	-	-	ko00000,ko00001,ko04040	1.A.47	-	-	Voldacs
XP_028052437.1	2711.XP_006490239.1	5.95e-119	345.0	KOG3238@1|root,KOG3238@2759|Eukaryota,37T44@33090|Viridiplantae,3GF2N@35493|Streptophyta	35493|Streptophyta	P	Chloride conductance regulatory protein	-	-	-	ko:K05019	ko03013,map03013	-	-	-	ko00000,ko00001,ko04040	1.A.47	-	-	Voldacs
lcl|ORF6_TRINITY_DN2763_c0_g1_i3_1179_718	29760.VIT_16s0022g01560.t01	2.1e-68	213.0	KOG3238@1|root,KOG3238@2759|Eukaryota,37T44@33090|Viridiplantae,3GF2N@35493|Streptophyta	35493|Streptophyta	P	Chloride conductance regulatory protein	-	-	-	ko:K05019	ko03013,map03013	-	-	-	ko00000,ko00001,ko04040	1.A.47	-	-	Voldacs
lcl|ORF1_TRINITY_DN1476_c0_g1_i1_51_743	3641.EOY22946	2.05e-120	348.0	KOG3238@1|root,KOG3238@2759|Eukaryota,37T44@33090|Viridiplantae,3GF2N@35493|Streptophyta	35493|Streptophyta	P	Chloride conductance regulatory protein	-	-	-	ko:K05019	ko03013,map03013	-	-	-	ko00000,ko00001,ko04040	1.A.47	-	-	Voldacs
lcl|ORF1_TRINITY_DN2421_c0_g1_i1_58_750	3641.EOY22946	2.05e-120	348.0	KOG3238@1|root,KOG3238@2759|Eukaryota,37T44@33090|Viridiplantae,3GF2N@35493|Streptophyta	35493|Streptophyta	P	Chloride conductance regulatory protein	-	-	-	ko:K05019	ko03013,map03013	-	-	-	ko00000,ko00001,ko04040	1.A.47	-	-	Voldacs
lcl|ORF5_TRINITY_DN4650_c0_g1_i1_62_754	3641.EOY22946	2.05e-120	348.0	KOG3238@1|root,KOG3238@2759|Eukaryota,37T44@33090|Viridiplantae,3GF2N@35493|Streptophyta	35493|Streptophyta	P	Chloride conductance regulatory protein	-	-	-	ko:K05019	ko03013,map03013	-	-	-	ko00000,ko00001,ko04040	1.A.47	-	-	Voldacs
lcl|ORF9_TRINITY_DN7369_c0_g1_i8_1685_312	29760.VIT_04s0023g02440.t01	8.21e-152	445.0	28IKC@1|root,2QQX9@2759|Eukaryota,37J7D@33090|Viridiplantae,3GEZJ@35493|Streptophyta	35493|Streptophyta	S	HECT-like Ubiquitin-conjugating enzyme (E2)-binding	-	-	-	-	-	-	-	-	-	-	-	-	HECT_2
lcl|ORF8_TRINITY_DN4800_c0_g1_i2_2098_287	102107.XP_008241722.1	4.76e-194	563.0	28IKC@1|root,2QQX9@2759|Eukaryota,37J7D@33090|Viridiplantae,3GEZJ@35493|Streptophyta,4JG9F@91835|fabids	35493|Streptophyta	S	HECT-like Ubiquitin-conjugating enzyme (E2)-binding	-	-	-	-	-	-	-	-	-	-	-	-	HECT_2
lcl|ORF14_TRINITY_DN2976_c0_g1_i17_2894_1053	102107.XP_008241722.1	1.1e-171	507.0	28IKC@1|root,2QQX9@2759|Eukaryota,37J7D@33090|Viridiplantae,3GEZJ@35493|Streptophyta,4JG9F@91835|fabids	35493|Streptophyta	S	HECT-like Ubiquitin-conjugating enzyme (E2)-binding	-	-	-	-	-	-	-	-	-	-	-	-	HECT_2
XP_028114673.1	102107.XP_008241722.1	1.51e-195	567.0	28IKC@1|root,2QQX9@2759|Eukaryota,37J7D@33090|Viridiplantae,3GEZJ@35493|Streptophyta,4JG9F@91835|fabids	35493|Streptophyta	S	HECT-like Ubiquitin-conjugating enzyme (E2)-binding	-	-	-	-	-	-	-	-	-	-	-	-	HECT_2
lcl|ORF9_TRINITY_DN2036_c0_g1_i4_2124_313	102107.XP_008241722.1	2.93e-195	566.0	28IKC@1|root,2QQX9@2759|Eukaryota,37J7D@33090|Viridiplantae,3GEZJ@35493|Streptophyta,4JG9F@91835|fabids	35493|Streptophyta	S	HECT-like Ubiquitin-conjugating enzyme (E2)-binding	-	-	-	-	-	-	-	-	-	-	-	-	HECT_2
lcl|ORF6_TRINITY_DN9216_c0_g1_i1_110_919	29760.VIT_04s0023g02440.t01	2.91e-104	316.0	28IKC@1|root,2QQX9@2759|Eukaryota,37J7D@33090|Viridiplantae,3GEZJ@35493|Streptophyta	35493|Streptophyta	S	HECT-like Ubiquitin-conjugating enzyme (E2)-binding	-	-	-	-	-	-	-	-	-	-	-	-	HECT_2
lcl|ORF11_TRINITY_DN6607_c0_g1_i2_1491_313	29760.VIT_04s0023g02440.t01	5.99e-114	346.0	28IKC@1|root,2QQX9@2759|Eukaryota,37J7D@33090|Viridiplantae,3GEZJ@35493|Streptophyta	35493|Streptophyta	S	HECT-like Ubiquitin-conjugating enzyme (E2)-binding	-	-	-	-	-	-	-	-	-	-	-	-	HECT_2
lcl|ORF19_TRINITY_DN3478_c0_g1_i25_2124_313	102107.XP_008241722.1	1.92e-193	562.0	28IKC@1|root,2QQX9@2759|Eukaryota,37J7D@33090|Viridiplantae,3GEZJ@35493|Streptophyta,4JG9F@91835|fabids	35493|Streptophyta	S	HECT-like Ubiquitin-conjugating enzyme (E2)-binding	-	-	-	-	-	-	-	-	-	-	-	-	HECT_2
lcl|ORF9_TRINITY_DN7402_c0_g1_i5_707_168	4432.XP_010242547.1	8.17e-76	231.0	KOG4161@1|root,KOG4161@2759|Eukaryota,37UG7@33090|Viridiplantae,3GIRH@35493|Streptophyta	35493|Streptophyta	BK	methyl-CpG-binding domain-containing protein	MBD4	GO:0000166,GO:0003674,GO:0003676,GO:0003677,GO:0005488,GO:0005575,GO:0005622,GO:0005623,GO:0005634,GO:0008327,GO:0036094,GO:0043226,GO:0043227,GO:0043229,GO:0043231,GO:0043565,GO:0044424,GO:0044464,GO:0097159,GO:1901265,GO:1901363	-	-	-	-	-	-	-	-	-	-	MBD,zf-CW
lcl|ORF3_TRINITY_DN15211_c0_g1_i1_774_235	4432.XP_010242547.1	1.16e-75	231.0	KOG4161@1|root,KOG4161@2759|Eukaryota,37UG7@33090|Viridiplantae,3GIRH@35493|Streptophyta	35493|Streptophyta	BK	methyl-CpG-binding domain-containing protein	MBD4	GO:0000166,GO:0003674,GO:0003676,GO:0003677,GO:0005488,GO:0005575,GO:0005622,GO:0005623,GO:0005634,GO:0008327,GO:0036094,GO:0043226,GO:0043227,GO:0043229,GO:0043231,GO:0043565,GO:0044424,GO:0044464,GO:0097159,GO:1901265,GO:1901363	-	-	-	-	-	-	-	-	-	-	MBD,zf-CW
lcl|ORF1_TRINITY_DN7138_c0_g2_i3_576_803	4432.XP_010242547.1	1.56e-22	92.0	KOG4161@1|root,KOG4161@2759|Eukaryota,37UG7@33090|Viridiplantae,3GIRH@35493|Streptophyta	35493|Streptophyta	BK	methyl-CpG-binding domain-containing protein	MBD4	GO:0000166,GO:0003674,GO:0003676,GO:0003677,GO:0005488,GO:0005575,GO:0005622,GO:0005623,GO:0005634,GO:0008327,GO:0036094,GO:0043226,GO:0043227,GO:0043229,GO:0043231,GO:0043565,GO:0044424,GO:0044464,GO:0097159,GO:1901265,GO:1901363	-	-	-	-	-	-	-	-	-	-	MBD,zf-CW
XP_028067436.1	4432.XP_010242547.1	1.59e-73	227.0	KOG4161@1|root,KOG4161@2759|Eukaryota,37UG7@33090|Viridiplantae,3GIRH@35493|Streptophyta	35493|Streptophyta	BK	methyl-CpG-binding domain-containing protein	MBD4	GO:0000166,GO:0003674,GO:0003676,GO:0003677,GO:0005488,GO:0005575,GO:0005622,GO:0005623,GO:0005634,GO:0008327,GO:0036094,GO:0043226,GO:0043227,GO:0043229,GO:0043231,GO:0043565,GO:0044424,GO:0044464,GO:0097159,GO:1901265,GO:1901363	-	-	-	-	-	-	-	-	-	-	MBD,zf-CW
lcl|ORF3_TRINITY_DN18471_c0_g1_i2_783_244	4432.XP_010242547.1	1.65e-75	231.0	KOG4161@1|root,KOG4161@2759|Eukaryota,37UG7@33090|Viridiplantae,3GIRH@35493|Streptophyta	35493|Streptophyta	BK	methyl-CpG-binding domain-containing protein	MBD4	GO:0000166,GO:0003674,GO:0003676,GO:0003677,GO:0005488,GO:0005575,GO:0005622,GO:0005623,GO:0005634,GO:0008327,GO:0036094,GO:0043226,GO:0043227,GO:0043229,GO:0043231,GO:0043565,GO:0044424,GO:0044464,GO:0097159,GO:1901265,GO:1901363	-	-	-	-	-	-	-	-	-	-	MBD,zf-CW
lcl|ORF9_TRINITY_DN21499_c0_g1_i1_357_130	4432.XP_010242547.1	5.52e-23	93.2	KOG4161@1|root,KOG4161@2759|Eukaryota,37UG7@33090|Viridiplantae,3GIRH@35493|Streptophyta	35493|Streptophyta	BK	methyl-CpG-binding domain-containing protein	MBD4	GO:0000166,GO:0003674,GO:0003676,GO:0003677,GO:0005488,GO:0005575,GO:0005622,GO:0005623,GO:0005634,GO:0008327,GO:0036094,GO:0043226,GO:0043227,GO:0043229,GO:0043231,GO:0043565,GO:0044424,GO:0044464,GO:0097159,GO:1901265,GO:1901363	-	-	-	-	-	-	-	-	-	-	MBD,zf-CW
lcl|ORF3_TRINITY_DN5304_c0_g1_i5_682_909	4432.XP_010242547.1	5.52e-23	93.2	KOG4161@1|root,KOG4161@2759|Eukaryota,37UG7@33090|Viridiplantae,3GIRH@35493|Streptophyta	35493|Streptophyta	BK	methyl-CpG-binding domain-containing protein	MBD4	GO:0000166,GO:0003674,GO:0003676,GO:0003677,GO:0005488,GO:0005575,GO:0005622,GO:0005623,GO:0005634,GO:0008327,GO:0036094,GO:0043226,GO:0043227,GO:0043229,GO:0043231,GO:0043565,GO:0044424,GO:0044464,GO:0097159,GO:1901265,GO:1901363	-	-	-	-	-	-	-	-	-	-	MBD,zf-CW
lcl|ORF1_TRINITY_DN29152_c0_g1_i1_81_620	4432.XP_010242547.1	5.75e-76	232.0	KOG4161@1|root,KOG4161@2759|Eukaryota,37UG7@33090|Viridiplantae,3GIRH@35493|Streptophyta	35493|Streptophyta	BK	methyl-CpG-binding domain-containing protein	MBD4	GO:0000166,GO:0003674,GO:0003676,GO:0003677,GO:0005488,GO:0005575,GO:0005622,GO:0005623,GO:0005634,GO:0008327,GO:0036094,GO:0043226,GO:0043227,GO:0043229,GO:0043231,GO:0043565,GO:0044424,GO:0044464,GO:0097159,GO:1901265,GO:1901363	-	-	-	-	-	-	-	-	-	-	MBD,zf-CW
lcl|ORF3_TRINITY_DN5889_c0_g1_i8_461_886	4155.Migut.C01409.1.p	4.19e-38	133.0	2AQN5@1|root,2RZJA@2759|Eukaryota,37USS@33090|Viridiplantae,3GJKS@35493|Streptophyta,44K9R@71274|asterids	35493|Streptophyta	-	-	-	-	-	-	-	-	-	-	-	-	-	-	-
lcl|ORF1_TRINITY_DN14500_c0_g1_i1_39_464	4098.XP_009602078.1	3.31e-46	153.0	2AQN5@1|root,2RZJA@2759|Eukaryota,37USS@33090|Viridiplantae,3GJKS@35493|Streptophyta,44K9R@71274|asterids	35493|Streptophyta	-	-	-	-	-	-	-	-	-	-	-	-	-	-	-
lcl|ORF5_TRINITY_DN38057_c0_g1_i1_702_277	4098.XP_009602078.1	1.22e-48	159.0	2AQN5@1|root,2RZJA@2759|Eukaryota,37USS@33090|Viridiplantae,3GJKS@35493|Streptophyta,44K9R@71274|asterids	35493|Streptophyta	-	-	-	-	-	-	-	-	-	-	-	-	-	-	-
XP_028085977.1	4098.XP_009602078.1	1.05e-49	162.0	2AQN5@1|root,2RZJA@2759|Eukaryota,37USS@33090|Viridiplantae,3GJKS@35493|Streptophyta,44K9R@71274|asterids	35493|Streptophyta	-	-	-	-	-	-	-	-	-	-	-	-	-	-	-
lcl|ORF3_TRINITY_DN66399_c0_g1_i1_187_612	4155.Migut.C01409.1.p	4.19e-38	133.0	2AQN5@1|root,2RZJA@2759|Eukaryota,37USS@33090|Viridiplantae,3GJKS@35493|Streptophyta,44K9R@71274|asterids	35493|Streptophyta	-	-	-	-	-	-	-	-	-	-	-	-	-	-	-
lcl|ORF3_TRINITY_DN10899_c0_g1_i1_53_478	4098.XP_009602078.1	1.42e-47	157.0	2AQN5@1|root,2RZJA@2759|Eukaryota,37USS@33090|Viridiplantae,3GJKS@35493|Streptophyta,44K9R@71274|asterids	35493|Streptophyta	-	-	-	-	-	-	-	-	-	-	-	-	-	-	-
lcl|ORF6_TRINITY_DN1929_c0_g1_i1_709_284	4098.XP_009602078.1	2.46e-48	159.0	2AQN5@1|root,2RZJA@2759|Eukaryota,37USS@33090|Viridiplantae,3GJKS@35493|Streptophyta,44K9R@71274|asterids	35493|Streptophyta	-	-	-	-	-	-	-	-	-	-	-	-	-	-	-
lcl|ORF3_TRINITY_DN3297_c0_g1_i1_592_167	4098.XP_009602078.1	2.01e-47	156.0	2AQN5@1|root,2RZJA@2759|Eukaryota,37USS@33090|Viridiplantae,3GJKS@35493|Streptophyta,44K9R@71274|asterids	35493|Streptophyta	-	-	-	-	-	-	-	-	-	-	-	-	-	-	-
lcl|ORF6_TRINITY_DN5879_c0_g1_i2_161_1642	29760.VIT_15s0046g00710.t01	4.22e-188	542.0	28MFN@1|root,2S35Q@2759|Eukaryota,37Z6U@33090|Viridiplantae,3GNN1@35493|Streptophyta	35493|Streptophyta	S	Wax ester synthase-like Acyl-CoA acyltransferase domain	-	-	-	-	-	-	-	-	-	-	-	-	DUF1298,WES_acyltransf
lcl|ORF10_TRINITY_DN6187_c0_g1_i1_1731_250	29760.VIT_15s0046g00710.t01	4.22e-188	542.0	28MFN@1|root,2S35Q@2759|Eukaryota,37Z6U@33090|Viridiplantae,3GNN1@35493|Streptophyta	35493|Streptophyta	S	Wax ester synthase-like Acyl-CoA acyltransferase domain	-	-	-	-	-	-	-	-	-	-	-	-	DUF1298,WES_acyltransf
lcl|ORF16_TRINITY_DN2340_c0_g1_i1_1829_348	29760.VIT_15s0046g00710.t01	5.2e-189	544.0	28MFN@1|root,2S35Q@2759|Eukaryota,37Z6U@33090|Viridiplantae,3GNN1@35493|Streptophyta	35493|Streptophyta	S	Wax ester synthase-like Acyl-CoA acyltransferase domain	-	-	-	-	-	-	-	-	-	-	-	-	DUF1298,WES_acyltransf
XP_028068688.1	29760.VIT_15s0046g00710.t01	1.29e-150	444.0	28MFN@1|root,2S35Q@2759|Eukaryota,37Z6U@33090|Viridiplantae,3GNN1@35493|Streptophyta	35493|Streptophyta	S	Wax ester synthase-like Acyl-CoA acyltransferase domain	-	-	-	-	-	-	-	-	-	-	-	-	DUF1298,WES_acyltransf
lcl|ORF8_TRINITY_DN8459_c0_g1_i2_80_1414	29760.VIT_15s0046g00710.t01	3.46e-164	479.0	28MFN@1|root,2S35Q@2759|Eukaryota,37Z6U@33090|Viridiplantae,3GNN1@35493|Streptophyta	35493|Streptophyta	S	Wax ester synthase-like Acyl-CoA acyltransferase domain	-	-	-	-	-	-	-	-	-	-	-	-	DUF1298,WES_acyltransf
lcl|ORF1_TRINITY_DN1276_c0_g1_i1_123_1604	29760.VIT_15s0046g00710.t01	3.43e-187	540.0	28MFN@1|root,2S35Q@2759|Eukaryota,37Z6U@33090|Viridiplantae,3GNN1@35493|Streptophyta	35493|Streptophyta	S	Wax ester synthase-like Acyl-CoA acyltransferase domain	-	-	-	-	-	-	-	-	-	-	-	-	DUF1298,WES_acyltransf
lcl|ORF1_TRINITY_DN2006_c0_g1_i2_216_1697	29760.VIT_15s0046g00710.t01	3.43e-187	540.0	28MFN@1|root,2S35Q@2759|Eukaryota,37Z6U@33090|Viridiplantae,3GNN1@35493|Streptophyta	35493|Streptophyta	S	Wax ester synthase-like Acyl-CoA acyltransferase domain	-	-	-	-	-	-	-	-	-	-	-	-	DUF1298,WES_acyltransf
lcl|ORF6_TRINITY_DN13501_c0_g1_i1_71_1552	29760.VIT_15s0046g00710.t01	1.2e-187	541.0	28MFN@1|root,2S35Q@2759|Eukaryota,37Z6U@33090|Viridiplantae,3GNN1@35493|Streptophyta	35493|Streptophyta	S	Wax ester synthase-like Acyl-CoA acyltransferase domain	-	-	-	-	-	-	-	-	-	-	-	-	DUF1298,WES_acyltransf
lcl|ORF1_TRINITY_DN55377_c0_g1_i15_139_912	4432.XP_010274786.1	3.16e-141	405.0	KOG2845@1|root,KOG2845@2759|Eukaryota,37NCV@33090|Viridiplantae,3GDQH@35493|Streptophyta	35493|Streptophyta	K	ASCH domain	-	-	-	-	-	-	-	-	-	-	-	-	ASCH
lcl|ORF1_TRINITY_DN6179_c0_g1_i2_151_924	4096.XP_009766876.1	2.28e-137	393.0	KOG2845@1|root,KOG2845@2759|Eukaryota,37NCV@33090|Viridiplantae,3GDQH@35493|Streptophyta,44CU3@71274|asterids	35493|Streptophyta	K	ASCH	-	-	-	-	-	-	-	-	-	-	-	-	ASCH
lcl|ORF8_TRINITY_DN7258_c0_g1_i3_768_181	4432.XP_010274786.1	1.66e-93	282.0	KOG2845@1|root,KOG2845@2759|Eukaryota,37NCV@33090|Viridiplantae,3GDQH@35493|Streptophyta	35493|Streptophyta	K	ASCH domain	-	-	-	-	-	-	-	-	-	-	-	-	ASCH
XP_028077716.1	4096.XP_009766876.1	7.96e-138	394.0	KOG2845@1|root,KOG2845@2759|Eukaryota,37NCV@33090|Viridiplantae,3GDQH@35493|Streptophyta,44CU3@71274|asterids	35493|Streptophyta	K	ASCH	-	-	-	-	-	-	-	-	-	-	-	-	ASCH
lcl|ORF7_TRINITY_DN9982_c0_g1_i1_933_160	4096.XP_009766876.1	4.13e-140	400.0	KOG2845@1|root,KOG2845@2759|Eukaryota,37NCV@33090|Viridiplantae,3GDQH@35493|Streptophyta,44CU3@71274|asterids	35493|Streptophyta	K	ASCH	-	-	-	-	-	-	-	-	-	-	-	-	ASCH
lcl|ORF6_TRINITY_DN4633_c0_g1_i2_921_148	4432.XP_010274786.1	7.03e-138	397.0	KOG2845@1|root,KOG2845@2759|Eukaryota,37NCV@33090|Viridiplantae,3GDQH@35493|Streptophyta	35493|Streptophyta	K	ASCH domain	-	-	-	-	-	-	-	-	-	-	-	-	ASCH
lcl|ORF9_TRINITY_DN6176_c0_g1_i1_990_217	4432.XP_010274786.1	4.95e-138	397.0	KOG2845@1|root,KOG2845@2759|Eukaryota,37NCV@33090|Viridiplantae,3GDQH@35493|Streptophyta	35493|Streptophyta	K	ASCH domain	-	-	-	-	-	-	-	-	-	-	-	-	ASCH
lcl|ORF1_TRINITY_DN18018_c0_g1_i2_88_861	4432.XP_010274786.1	3.49e-138	398.0	KOG2845@1|root,KOG2845@2759|Eukaryota,37NCV@33090|Viridiplantae,3GDQH@35493|Streptophyta	35493|Streptophyta	K	ASCH domain	-	-	-	-	-	-	-	-	-	-	-	-	ASCH
lcl|ORF2_TRINITY_DN21492_c0_g1_i2_160_1887	3641.EOY02643	7.09e-217	630.0	28P7B@1|root,2QVUC@2759|Eukaryota,37T6G@33090|Viridiplantae,3GXAJ@35493|Streptophyta	35493|Streptophyta	S	Protein FAR1-RELATED SEQUENCE 5-like	-	-	-	ko:K17604	-	-	-	-	ko00000,ko01009	-	-	-	FAR1,MULE,SWIM
lcl|ORF1_TRINITY_DN19966_c0_g1_i1_79_963	3641.EOY02643	2.77e-145	435.0	28P7B@1|root,2QVUC@2759|Eukaryota,37T6G@33090|Viridiplantae,3GXAJ@35493|Streptophyta	35493|Streptophyta	S	Protein FAR1-RELATED SEQUENCE 5-like	-	-	-	ko:K17604	-	-	-	-	ko00000,ko01009	-	-	-	FAR1,MULE,SWIM
lcl|ORF17_TRINITY_DN47459_c0_g1_i8_3033_448	102107.XP_008230452.1	0.0	1043.0	28P7B@1|root,2QVUC@2759|Eukaryota,37T6G@33090|Viridiplantae,3GXAJ@35493|Streptophyta,4JS1E@91835|fabids	35493|Streptophyta	S	FAR1 DNA-binding domain	-	-	-	ko:K17604	-	-	-	-	ko00000,ko01009	-	-	-	FAR1,MULE,SWIM
XP_028122937.1	3641.EOY02643	0.0	1037.0	28P7B@1|root,2QVUC@2759|Eukaryota,37T6G@33090|Viridiplantae,3GXAJ@35493|Streptophyta	35493|Streptophyta	S	Protein FAR1-RELATED SEQUENCE 5-like	-	-	-	ko:K17604	-	-	-	-	ko00000,ko01009	-	-	-	FAR1,MULE,SWIM
lcl|ORF17_TRINITY_DN0_c9_g1_i2_3007_422	102107.XP_008230452.1	0.0	1038.0	28P7B@1|root,2QVUC@2759|Eukaryota,37T6G@33090|Viridiplantae,3GXAJ@35493|Streptophyta,4JS1E@91835|fabids	35493|Streptophyta	S	FAR1 DNA-binding domain	-	-	-	ko:K17604	-	-	-	-	ko00000,ko01009	-	-	-	FAR1,MULE,SWIM
lcl|ORF1_TRINITY_DN24331_c0_g1_i3_156_2741	102107.XP_008230452.1	0.0	1042.0	28P7B@1|root,2QVUC@2759|Eukaryota,37T6G@33090|Viridiplantae,3GXAJ@35493|Streptophyta,4JS1E@91835|fabids	35493|Streptophyta	S	FAR1 DNA-binding domain	-	-	-	ko:K17604	-	-	-	-	ko00000,ko01009	-	-	-	FAR1,MULE,SWIM
lcl|ORF18_TRINITY_DN14034_c0_g1_i1_2876_291	102107.XP_008230452.1	0.0	1042.0	28P7B@1|root,2QVUC@2759|Eukaryota,37T6G@33090|Viridiplantae,3GXAJ@35493|Streptophyta,4JS1E@91835|fabids	35493|Streptophyta	S	FAR1 DNA-binding domain	-	-	-	ko:K17604	-	-	-	-	ko00000,ko01009	-	-	-	FAR1,MULE,SWIM
lcl|ORF34_TRINITY_DN18_c0_g1_i29_3972_1387	102107.XP_008230452.1	0.0	1044.0	28P7B@1|root,2QVUC@2759|Eukaryota,37T6G@33090|Viridiplantae,3GXAJ@35493|Streptophyta,4JS1E@91835|fabids	35493|Streptophyta	S	FAR1 DNA-binding domain	-	-	-	ko:K17604	-	-	-	-	ko00000,ko01009	-	-	-	FAR1,MULE,SWIM
lcl|ORF31_TRINITY_DN1988_c0_g1_i3_5053_251	3760.EMJ26674	0.0	2645.0	KOG1883@1|root,KOG1883@2759|Eukaryota,37KMM@33090|Viridiplantae,3GE20@35493|Streptophyta,4JHAH@91835|fabids	35493|Streptophyta	K	mediator of RNA polymerase II transcription subunit	-	GO:0005575,GO:0005622,GO:0005623,GO:0005634,GO:0005654,GO:0016592,GO:0031974,GO:0031981,GO:0032991,GO:0043226,GO:0043227,GO:0043229,GO:0043231,GO:0043233,GO:0044422,GO:0044424,GO:0044428,GO:0044446,GO:0044451,GO:0044464,GO:0070013	-	ko:K15166	-	-	-	-	ko00000,ko03021	-	-	-	Med23
lcl|ORF22_TRINITY_DN5141_c0_g1_i6_5024_222	3760.EMJ26674	0.0	2639.0	KOG1883@1|root,KOG1883@2759|Eukaryota,37KMM@33090|Viridiplantae,3GE20@35493|Streptophyta,4JHAH@91835|fabids	35493|Streptophyta	K	mediator of RNA polymerase II transcription subunit	-	GO:0005575,GO:0005622,GO:0005623,GO:0005634,GO:0005654,GO:0016592,GO:0031974,GO:0031981,GO:0032991,GO:0043226,GO:0043227,GO:0043229,GO:0043231,GO:0043233,GO:0044422,GO:0044424,GO:0044428,GO:0044446,GO:0044451,GO:0044464,GO:0070013	-	ko:K15166	-	-	-	-	ko00000,ko03021	-	-	-	Med23
lcl|ORF25_TRINITY_DN2812_c0_g1_i3_5088_286	3760.EMJ26674	0.0	2644.0	KOG1883@1|root,KOG1883@2759|Eukaryota,37KMM@33090|Viridiplantae,3GE20@35493|Streptophyta,4JHAH@91835|fabids	35493|Streptophyta	K	mediator of RNA polymerase II transcription subunit	-	GO:0005575,GO:0005622,GO:0005623,GO:0005634,GO:0005654,GO:0016592,GO:0031974,GO:0031981,GO:0032991,GO:0043226,GO:0043227,GO:0043229,GO:0043231,GO:0043233,GO:0044422,GO:0044424,GO:0044428,GO:0044446,GO:0044451,GO:0044464,GO:0070013	-	ko:K15166	-	-	-	-	ko00000,ko03021	-	-	-	Med23
XP_028120081.1	3760.EMJ26674	0.0	2653.0	KOG1883@1|root,KOG1883@2759|Eukaryota,37KMM@33090|Viridiplantae,3GE20@35493|Streptophyta,4JHAH@91835|fabids	35493|Streptophyta	K	mediator of RNA polymerase II transcription subunit	-	GO:0005575,GO:0005622,GO:0005623,GO:0005634,GO:0005654,GO:0016592,GO:0031974,GO:0031981,GO:0032991,GO:0043226,GO:0043227,GO:0043229,GO:0043231,GO:0043233,GO:0044422,GO:0044424,GO:0044428,GO:0044446,GO:0044451,GO:0044464,GO:0070013	-	ko:K15166	-	-	-	-	ko00000,ko03021	-	-	-	Med23
lcl|ORF34_TRINITY_DN1945_c0_g1_i1_5069_267	3760.EMJ26674	0.0	2647.0	KOG1883@1|root,KOG1883@2759|Eukaryota,37KMM@33090|Viridiplantae,3GE20@35493|Streptophyta,4JHAH@91835|fabids	35493|Streptophyta	K	mediator of RNA polymerase II transcription subunit	-	GO:0005575,GO:0005622,GO:0005623,GO:0005634,GO:0005654,GO:0016592,GO:0031974,GO:0031981,GO:0032991,GO:0043226,GO:0043227,GO:0043229,GO:0043231,GO:0043233,GO:0044422,GO:0044424,GO:0044428,GO:0044446,GO:0044451,GO:0044464,GO:0070013	-	ko:K15166	-	-	-	-	ko00000,ko03021	-	-	-	Med23
lcl|ORF18_TRINITY_DN1434_c0_g1_i2_3035_279	102107.XP_008221446.1	0.0	1501.0	KOG1883@1|root,KOG1883@2759|Eukaryota,37KMM@33090|Viridiplantae,3GE20@35493|Streptophyta,4JHAH@91835|fabids	35493|Streptophyta	K	mediator of RNA polymerase II transcription subunit	-	GO:0005575,GO:0005622,GO:0005623,GO:0005634,GO:0005654,GO:0016592,GO:0031974,GO:0031981,GO:0032991,GO:0043226,GO:0043227,GO:0043229,GO:0043231,GO:0043233,GO:0044422,GO:0044424,GO:0044428,GO:0044446,GO:0044451,GO:0044464,GO:0070013	-	ko:K15166	-	-	-	-	ko00000,ko03021	-	-	-	Med23
lcl|ORF22_TRINITY_DN4206_c0_g1_i11_5061_259	3760.EMJ26674	0.0	2645.0	KOG1883@1|root,KOG1883@2759|Eukaryota,37KMM@33090|Viridiplantae,3GE20@35493|Streptophyta,4JHAH@91835|fabids	35493|Streptophyta	K	mediator of RNA polymerase II transcription subunit	-	GO:0005575,GO:0005622,GO:0005623,GO:0005634,GO:0005654,GO:0016592,GO:0031974,GO:0031981,GO:0032991,GO:0043226,GO:0043227,GO:0043229,GO:0043231,GO:0043233,GO:0044422,GO:0044424,GO:0044428,GO:0044446,GO:0044451,GO:0044464,GO:0070013	-	ko:K15166	-	-	-	-	ko00000,ko03021	-	-	-	Med23
lcl|ORF11_TRINITY_DN2541_c0_g1_i8_50_4852	3760.EMJ26674	0.0	2645.0	KOG1883@1|root,KOG1883@2759|Eukaryota,37KMM@33090|Viridiplantae,3GE20@35493|Streptophyta,4JHAH@91835|fabids	35493|Streptophyta	K	mediator of RNA polymerase II transcription subunit	-	GO:0005575,GO:0005622,GO:0005623,GO:0005634,GO:0005654,GO:0016592,GO:0031974,GO:0031981,GO:0032991,GO:0043226,GO:0043227,GO:0043229,GO:0043231,GO:0043233,GO:0044422,GO:0044424,GO:0044428,GO:0044446,GO:0044451,GO:0044464,GO:0070013	-	ko:K15166	-	-	-	-	ko00000,ko03021	-	-	-	Med23
lcl|ORF6_TRINITY_DN12298_c0_g1_i1_992_0	4098.XP_009610168.1	4.75e-100	310.0	KOG4197@1|root,KOG4197@2759|Eukaryota,37HVC@33090|Viridiplantae,3G88R@35493|Streptophyta,44EB6@71274|asterids	35493|Streptophyta	S	PPR repeat	-	GO:0003674,GO:0003676,GO:0003723,GO:0003824,GO:0004518,GO:0004519,GO:0005488,GO:0005575,GO:0005622,GO:0005623,GO:0006139,GO:0006725,GO:0006807,GO:0008150,GO:0008152,GO:0009451,GO:0009987,GO:0016070,GO:0016787,GO:0016788,GO:0034641,GO:0043170,GO:0043226,GO:0043227,GO:0043229,GO:0043231,GO:0043412,GO:0044237,GO:0044238,GO:0044424,GO:0044464,GO:0046483,GO:0071704,GO:0090304,GO:0090305,GO:0097159,GO:…	-	-	-	-	-	-	-	-	-	-	PPR,PPR_2
lcl|ORF8_TRINITY_DN14314_c0_g1_i1_1121_90	4098.XP_009610168.1	2.61e-122	368.0	KOG4197@1|root,KOG4197@2759|Eukaryota,37HVC@33090|Viridiplantae,3G88R@35493|Streptophyta,44EB6@71274|asterids	35493|Streptophyta	S	PPR repeat	-	GO:0003674,GO:0003676,GO:0003723,GO:0003824,GO:0004518,GO:0004519,GO:0005488,GO:0005575,GO:0005622,GO:0005623,GO:0006139,GO:0006725,GO:0006807,GO:0008150,GO:0008152,GO:0009451,GO:0009987,GO:0016070,GO:0016787,GO:0016788,GO:0034641,GO:0043170,GO:0043226,GO:0043227,GO:0043229,GO:0043231,GO:0043412,GO:0044237,GO:0044238,GO:0044424,GO:0044464,GO:0046483,GO:0071704,GO:0090304,GO:0090305,GO:0097159,GO:…	-	-	-	-	-	-	-	-	-	-	PPR,PPR_2
lcl|ORF3_TRINITY_DN30783_c0_g1_i1_170_1690	4098.XP_009610168.1	7.09e-174	506.0	KOG4197@1|root,KOG4197@2759|Eukaryota,37HVC@33090|Viridiplantae,3G88R@35493|Streptophyta,44EB6@71274|asterids	35493|Streptophyta	S	PPR repeat	-	GO:0003674,GO:0003676,GO:0003723,GO:0003824,GO:0004518,GO:0004519,GO:0005488,GO:0005575,GO:0005622,GO:0005623,GO:0006139,GO:0006725,GO:0006807,GO:0008150,GO:0008152,GO:0009451,GO:0009987,GO:0016070,GO:0016787,GO:0016788,GO:0034641,GO:0043170,GO:0043226,GO:0043227,GO:0043229,GO:0043231,GO:0043412,GO:0044237,GO:0044238,GO:0044424,GO:0044464,GO:0046483,GO:0071704,GO:0090304,GO:0090305,GO:0097159,GO:…	-	-	-	-	-	-	-	-	-	-	PPR,PPR_2
XP_028117822.1	4098.XP_009610168.1	6.18e-173	503.0	KOG4197@1|root,KOG4197@2759|Eukaryota,37HVC@33090|Viridiplantae,3G88R@35493|Streptophyta,44EB6@71274|asterids	35493|Streptophyta	S	PPR repeat	-	GO:0003674,GO:0003676,GO:0003723,GO:0003824,GO:0004518,GO:0004519,GO:0005488,GO:0005575,GO:0005622,GO:0005623,GO:0006139,GO:0006725,GO:0006807,GO:0008150,GO:0008152,GO:0009451,GO:0009987,GO:0016070,GO:0016787,GO:0016788,GO:0034641,GO:0043170,GO:0043226,GO:0043227,GO:0043229,GO:0043231,GO:0043412,GO:0044237,GO:0044238,GO:0044424,GO:0044464,GO:0046483,GO:0071704,GO:0090304,GO:0090305,GO:0097159,GO:…	-	-	-	-	-	-	-	-	-	-	PPR,PPR_2
lcl|ORF2_TRINITY_DN4753_c0_g1_i2_79_1599	4098.XP_009610168.1	2.32e-172	502.0	KOG4197@1|root,KOG4197@2759|Eukaryota,37HVC@33090|Viridiplantae,3G88R@35493|Streptophyta,44EB6@71274|asterids	35493|Streptophyta	S	PPR repeat	-	GO:0003674,GO:0003676,GO:0003723,GO:0003824,GO:0004518,GO:0004519,GO:0005488,GO:0005575,GO:0005622,GO:0005623,GO:0006139,GO:0006725,GO:0006807,GO:0008150,GO:0008152,GO:0009451,GO:0009987,GO:0016070,GO:0016787,GO:0016788,GO:0034641,GO:0043170,GO:0043226,GO:0043227,GO:0043229,GO:0043231,GO:0043412,GO:0044237,GO:0044238,GO:0044424,GO:0044464,GO:0046483,GO:0071704,GO:0090304,GO:0090305,GO:0097159,GO:…	-	-	-	-	-	-	-	-	-	-	PPR,PPR_2
lcl|ORF9_TRINITY_DN28468_c0_g1_i1_1744_230	4098.XP_009610168.1	2.3e-169	494.0	KOG4197@1|root,KOG4197@2759|Eukaryota,37HVC@33090|Viridiplantae,3G88R@35493|Streptophyta,44EB6@71274|asterids	35493|Streptophyta	S	PPR repeat	-	GO:0003674,GO:0003676,GO:0003723,GO:0003824,GO:0004518,GO:0004519,GO:0005488,GO:0005575,GO:0005622,GO:0005623,GO:0006139,GO:0006725,GO:0006807,GO:0008150,GO:0008152,GO:0009451,GO:0009987,GO:0016070,GO:0016787,GO:0016788,GO:0034641,GO:0043170,GO:0043226,GO:0043227,GO:0043229,GO:0043231,GO:0043412,GO:0044237,GO:0044238,GO:0044424,GO:0044464,GO:0046483,GO:0071704,GO:0090304,GO:0090305,GO:0097159,GO:…	-	-	-	-	-	-	-	-	-	-	PPR,PPR_2
lcl|ORF13_TRINITY_DN29029_c0_g1_i2_2324_810	4098.XP_009610168.1	8.09e-170	495.0	KOG4197@1|root,KOG4197@2759|Eukaryota,37HVC@33090|Viridiplantae,3G88R@35493|Streptophyta,44EB6@71274|asterids	35493|Streptophyta	S	PPR repeat	-	GO:0003674,GO:0003676,GO:0003723,GO:0003824,GO:0004518,GO:0004519,GO:0005488,GO:0005575,GO:0005622,GO:0005623,GO:0006139,GO:0006725,GO:0006807,GO:0008150,GO:0008152,GO:0009451,GO:0009987,GO:0016070,GO:0016787,GO:0016788,GO:0034641,GO:0043170,GO:0043226,GO:0043227,GO:0043229,GO:0043231,GO:0043412,GO:0044237,GO:0044238,GO:0044424,GO:0044464,GO:0046483,GO:0071704,GO:0090304,GO:0090305,GO:0097159,GO:…	-	-	-	-	-	-	-	-	-	-	PPR,PPR_2
lcl|ORF3_TRINITY_DN10307_c0_g1_i5_92_1606	4098.XP_009610168.1	3.98e-165	483.0	KOG4197@1|root,KOG4197@2759|Eukaryota,37HVC@33090|Viridiplantae,3G88R@35493|Streptophyta,44EB6@71274|asterids	35493|Streptophyta	S	PPR repeat	-	GO:0003674,GO:0003676,GO:0003723,GO:0003824,GO:0004518,GO:0004519,GO:0005488,GO:0005575,GO:0005622,GO:0005623,GO:0006139,GO:0006725,GO:0006807,GO:0008150,GO:0008152,GO:0009451,GO:0009987,GO:0016070,GO:0016787,GO:0016788,GO:0034641,GO:0043170,GO:0043226,GO:0043227,GO:0043229,GO:0043231,GO:0043412,GO:0044237,GO:0044238,GO:0044424,GO:0044464,GO:0046483,GO:0071704,GO:0090304,GO:0090305,GO:0097159,GO:…	-	-	-	-	-	-	-	-	-	-	PPR,PPR_2
lcl|ORF6_TRINITY_DN12237_c0_g1_i3_731_1519	2711.XP_006467864.1	2.19e-44	163.0	28IY0@1|root,2QUY2@2759|Eukaryota,37QMB@33090|Viridiplantae,3GFXV@35493|Streptophyta	35493|Streptophyta	K	bromo domain	-	-	-	-	-	-	-	-	-	-	-	-	Bromodomain,Myb_DNA-binding
lcl|ORF4_TRINITY_DN17962_c0_g1_i1_789_1	2711.XP_006467864.1	2.16e-45	166.0	28IY0@1|root,2QUY2@2759|Eukaryota,37QMB@33090|Viridiplantae,3GFXV@35493|Streptophyta	35493|Streptophyta	K	bromo domain	-	-	-	-	-	-	-	-	-	-	-	-	Bromodomain,Myb_DNA-binding
lcl|ORF7_TRINITY_DN7435_c0_g1_i2_1001_213	2711.XP_006467864.1	2.19e-44	163.0	28IY0@1|root,2QUY2@2759|Eukaryota,37QMB@33090|Viridiplantae,3GFXV@35493|Streptophyta	35493|Streptophyta	K	bromo domain	-	-	-	-	-	-	-	-	-	-	-	-	Bromodomain,Myb_DNA-binding
XP_028096342.1	3641.EOY28363	1.23e-148	442.0	28IY0@1|root,2QUY2@2759|Eukaryota,37QMB@33090|Viridiplantae,3GFXV@35493|Streptophyta	35493|Streptophyta	K	bromo domain	-	-	-	-	-	-	-	-	-	-	-	-	Bromodomain,Myb_DNA-binding
lcl|ORF1_TRINITY_DN45147_c0_g1_i2_799_1224	225117.XP_009378345.1	1.45e-41	150.0	28IY0@1|root,2QUY2@2759|Eukaryota,37QMB@33090|Viridiplantae,3GFXV@35493|Streptophyta,4JDJZ@91835|fabids	35493|Streptophyta	K	bromo domain	-	-	-	-	-	-	-	-	-	-	-	-	Bromodomain,Myb_DNA-binding
lcl|ORF5_TRINITY_DN5600_c0_g1_i8_782_1693	102107.XP_008224980.1	5.74e-45	166.0	28IY0@1|root,2QUY2@2759|Eukaryota,37QMB@33090|Viridiplantae,3GFXV@35493|Streptophyta,4JDJZ@91835|fabids	35493|Streptophyta	K	bromo domain	-	-	-	-	-	-	-	-	-	-	-	-	Bromodomain,Myb_DNA-binding
lcl|ORF1_TRINITY_DN11176_c0_g1_i4_826_1614	2711.XP_006467864.1	4.28e-44	162.0	28IY0@1|root,2QUY2@2759|Eukaryota,37QMB@33090|Viridiplantae,3GFXV@35493|Streptophyta	35493|Streptophyta	K	bromo domain	-	-	-	-	-	-	-	-	-	-	-	-	Bromodomain,Myb_DNA-binding
lcl|ORF8_TRINITY_DN17965_c0_g1_i1_394_2	29730.Gorai.011G024300.1	4.31e-36	135.0	28IY0@1|root,2QUY2@2759|Eukaryota,37QMB@33090|Viridiplantae,3GFXV@35493|Streptophyta	35493|Streptophyta	K	bromo domain	-	-	-	-	-	-	-	-	-	-	-	-	Bromodomain,Myb_DNA-binding
lcl|ORF7_TRINITY_DN2241_c0_g1_i12_134_2293	29760.VIT_07s0031g00840.t01	0.0	1059.0	KOG2659@1|root,KOG2659@2759|Eukaryota,37PWP@33090|Viridiplantae,3GEJR@35493|Streptophyta	35493|Streptophyta	Z	BEST Arabidopsis thaliana protein match is LisH and RanBPM domains containing protein (TAIR AT1G61150.1)	-	-	-	-	-	-	-	-	-	-	-	-	CLTH
lcl|ORF16_TRINITY_DN17466_c0_g1_i12_2538_379	29760.VIT_07s0031g00840.t01	0.0	1059.0	KOG2659@1|root,KOG2659@2759|Eukaryota,37PWP@33090|Viridiplantae,3GEJR@35493|Streptophyta	35493|Streptophyta	Z	BEST Arabidopsis thaliana protein match is LisH and RanBPM domains containing protein (TAIR AT1G61150.1)	-	-	-	-	-	-	-	-	-	-	-	-	CLTH
lcl|ORF16_TRINITY_DN25957_c0_g1_i2_2500_341	29760.VIT_07s0031g00840.t01	0.0	1047.0	KOG2659@1|root,KOG2659@2759|Eukaryota,37PWP@33090|Viridiplantae,3GEJR@35493|Streptophyta	35493|Streptophyta	Z	BEST Arabidopsis thaliana protein match is LisH and RanBPM domains containing protein (TAIR AT1G61150.1)	-	-	-	-	-	-	-	-	-	-	-	-	CLTH
XP_028106382.1	29760.VIT_07s0031g00840.t01	0.0	1057.0	KOG2659@1|root,KOG2659@2759|Eukaryota,37PWP@33090|Viridiplantae,3GEJR@35493|Streptophyta	35493|Streptophyta	Z	BEST Arabidopsis thaliana protein match is LisH and RanBPM domains containing protein (TAIR AT1G61150.1)	-	-	-	-	-	-	-	-	-	-	-	-	CLTH
lcl|ORF14_TRINITY_DN5235_c0_g1_i1_2490_190	29760.VIT_07s0031g00840.t01	0.0	1049.0	KOG2659@1|root,KOG2659@2759|Eukaryota,37PWP@33090|Viridiplantae,3GEJR@35493|Streptophyta	35493|Streptophyta	Z	BEST Arabidopsis thaliana protein match is LisH and RanBPM domains containing protein (TAIR AT1G61150.1)	-	-	-	-	-	-	-	-	-	-	-	-	CLTH
lcl|ORF16_TRINITY_DN10570_c0_g1_i8_2392_617	29760.VIT_07s0031g00840.t01	2.25e-298	833.0	KOG2659@1|root,KOG2659@2759|Eukaryota,37PWP@33090|Viridiplantae,3GEJR@35493|Streptophyta	35493|Streptophyta	Z	BEST Arabidopsis thaliana protein match is LisH and RanBPM domains containing protein (TAIR AT1G61150.1)	-	-	-	-	-	-	-	-	-	-	-	-	CLTH
lcl|ORF7_TRINITY_DN29128_c0_g1_i18_83_2242	29760.VIT_07s0031g00840.t01	0.0	1059.0	KOG2659@1|root,KOG2659@2759|Eukaryota,37PWP@33090|Viridiplantae,3GEJR@35493|Streptophyta	35493|Streptophyta	Z	BEST Arabidopsis thaliana protein match is LisH and RanBPM domains containing protein (TAIR AT1G61150.1)	-	-	-	-	-	-	-	-	-	-	-	-	CLTH
lcl|ORF1_TRINITY_DN8431_c0_g1_i4_87_2246	29760.VIT_07s0031g00840.t01	0.0	1059.0	KOG2659@1|root,KOG2659@2759|Eukaryota,37PWP@33090|Viridiplantae,3GEJR@35493|Streptophyta	35493|Streptophyta	Z	BEST Arabidopsis thaliana protein match is LisH and RanBPM domains containing protein (TAIR AT1G61150.1)	-	-	-	-	-	-	-	-	-	-	-	-	CLTH
lcl|ORF2_TRINITY_DN181_c0_g1_i5_103_1542	29760.VIT_12s0028g00830.t01	1.52e-274	760.0	28KGR@1|root,2QSXX@2759|Eukaryota,37NCD@33090|Viridiplantae,3G8H1@35493|Streptophyta	35493|Streptophyta	T	domain-containing protein	-	-	-	-	-	-	-	-	-	-	-	-	PH
lcl|ORF4_TRINITY_DN1638_c0_g1_i2_392_1558	29760.VIT_12s0028g00830.t01	6.24e-203	575.0	28KGR@1|root,2QSXX@2759|Eukaryota,37NCD@33090|Viridiplantae,3G8H1@35493|Streptophyta	35493|Streptophyta	T	domain-containing protein	-	-	-	-	-	-	-	-	-	-	-	-	PH
lcl|ORF2_TRINITY_DN3927_c0_g1_i1_810_1715	29760.VIT_12s0028g00830.t01	2.14e-153	445.0	28KGR@1|root,2QSXX@2759|Eukaryota,37NCD@33090|Viridiplantae,3G8H1@35493|Streptophyta	35493|Streptophyta	T	domain-containing protein	-	-	-	-	-	-	-	-	-	-	-	-	PH
XP_028059705.1	29760.VIT_12s0028g00830.t01	1.52e-274	760.0	28KGR@1|root,2QSXX@2759|Eukaryota,37NCD@33090|Viridiplantae,3G8H1@35493|Streptophyta	35493|Streptophyta	T	domain-containing protein	-	-	-	-	-	-	-	-	-	-	-	-	PH
lcl|ORF2_TRINITY_DN124938_c0_g1_i1_103_1542	29760.VIT_12s0028g00830.t01	7.54e-275	761.0	28KGR@1|root,2QSXX@2759|Eukaryota,37NCD@33090|Viridiplantae,3G8H1@35493|Streptophyta	35493|Streptophyta	T	domain-containing protein	-	-	-	-	-	-	-	-	-	-	-	-	PH
lcl|ORF12_TRINITY_DN11175_c0_g1_i1_1711_272	29760.VIT_12s0028g00830.t01	7.54e-275	761.0	28KGR@1|root,2QSXX@2759|Eukaryota,37NCD@33090|Viridiplantae,3G8H1@35493|Streptophyta	35493|Streptophyta	T	domain-containing protein	-	-	-	-	-	-	-	-	-	-	-	-	PH
lcl|ORF2_TRINITY_DN8418_c0_g1_i8_103_1542	29760.VIT_12s0028g00830.t01	7.54e-275	761.0	28KGR@1|root,2QSXX@2759|Eukaryota,37NCD@33090|Viridiplantae,3G8H1@35493|Streptophyta	35493|Streptophyta	T	domain-containing protein	-	-	-	-	-	-	-	-	-	-	-	-	PH
lcl|ORF2_TRINITY_DN6709_c0_g1_i1_94_1533	29760.VIT_12s0028g00830.t01	7.54e-275	761.0	28KGR@1|root,2QSXX@2759|Eukaryota,37NCD@33090|Viridiplantae,3G8H1@35493|Streptophyta	35493|Streptophyta	T	domain-containing protein	-	-	-	-	-	-	-	-	-	-	-	-	PH
lcl|ORF5_TRINITY_DN25754_c0_g1_i8_137_1183	29760.VIT_14s0060g01030.t01	3.72e-152	462.0	COG0637@1|root,KOG2177@1|root,KOG2177@2759|Eukaryota,KOG2914@2759|Eukaryota,37MAK@33090|Viridiplantae,3GD1A@35493|Streptophyta	35493|Streptophyta	O	NHL repeat-containing protein	-	GO:0005575,GO:0005622,GO:0005623,GO:0005737,GO:0008150,GO:0009314,GO:0009416,GO:0009507,GO:0009532,GO:0009534,GO:0009536,GO:0009570,GO:0009579,GO:0009628,GO:0010196,GO:0016020,GO:0031976,GO:0031984,GO:0034357,GO:0042651,GO:0043226,GO:0043227,GO:0043229,GO:0043231,GO:0044422,GO:0044424,GO:0044434,GO:0044435,GO:0044436,GO:0044444,GO:0044446,GO:0044464,GO:0050896,GO:1990066	-	-	-	-	-	-	-	-	-	-	HAD_2,NHL,Thioredoxin_8
lcl|ORF1_TRINITY_DN11084_c0_g1_i1_132_791	2711.XP_006472221.1	1.35e-120	374.0	COG0637@1|root,KOG2177@1|root,KOG2177@2759|Eukaryota,KOG2914@2759|Eukaryota,37MAK@33090|Viridiplantae,3GD1A@35493|Streptophyta	35493|Streptophyta	O	NHL repeat-containing protein	-	-	-	-	-	-	-	-	-	-	-	-	HAD_2,NHL,Thioredoxin_8
lcl|ORF2_TRINITY_DN1643_c0_g1_i7_628_1425	2711.XP_006472221.1	2.73e-127	394.0	COG0637@1|root,KOG2177@1|root,KOG2177@2759|Eukaryota,KOG2914@2759|Eukaryota,37MAK@33090|Viridiplantae,3GD1A@35493|Streptophyta	35493|Streptophyta	O	NHL repeat-containing protein	-	-	-	-	-	-	-	-	-	-	-	-	HAD_2,NHL,Thioredoxin_8
XP_028097878.1	3649.evm.model.supercontig_48.172	4.7e-50	175.0	COG0637@1|root,KOG2177@1|root,KOG2177@2759|Eukaryota,KOG2914@2759|Eukaryota,37MAK@33090|Viridiplantae,3GD1A@35493|Streptophyta,3HRTB@3699|Brassicales	35493|Streptophyta	O	Low-density lipoprotein-receptor YWTD domain	-	GO:0005575,GO:0005622,GO:0005623,GO:0005737,GO:0008150,GO:0009314,GO:0009416,GO:0009507,GO:0009532,GO:0009534,GO:0009536,GO:0009570,GO:0009579,GO:0009628,GO:0010196,GO:0016020,GO:0031976,GO:0031984,GO:0034357,GO:0042651,GO:0043226,GO:0043227,GO:0043229,GO:0043231,GO:0044422,GO:0044424,GO:0044434,GO:0044435,GO:0044436,GO:0044444,GO:0044446,GO:0044464,GO:0050896,GO:1990066	-	-	-	-	-	-	-	-	-	-	HAD_2,NHL,Thioredoxin_8
lcl|ORF3_TRINITY_DN16287_c0_g1_i4_76_1122	29760.VIT_14s0060g01030.t01	3.17e-150	457.0	COG0637@1|root,KOG2177@1|root,KOG2177@2759|Eukaryota,KOG2914@2759|Eukaryota,37MAK@33090|Viridiplantae,3GD1A@35493|Streptophyta	35493|Streptophyta	O	NHL repeat-containing protein	-	GO:0005575,GO:0005622,GO:0005623,GO:0005737,GO:0008150,GO:0009314,GO:0009416,GO:0009507,GO:0009532,GO:0009534,GO:0009536,GO:0009570,GO:0009579,GO:0009628,GO:0010196,GO:0016020,GO:0031976,GO:0031984,GO:0034357,GO:0042651,GO:0043226,GO:0043227,GO:0043229,GO:0043231,GO:0044422,GO:0044424,GO:0044434,GO:0044435,GO:0044436,GO:0044444,GO:0044446,GO:0044464,GO:0050896,GO:1990066	-	-	-	-	-	-	-	-	-	-	HAD_2,NHL,Thioredoxin_8
lcl|ORF2_TRINITY_DN49042_c0_g1_i1_37_1083	29760.VIT_14s0060g01030.t01	6.27e-150	456.0	COG0637@1|root,KOG2177@1|root,KOG2177@2759|Eukaryota,KOG2914@2759|Eukaryota,37MAK@33090|Viridiplantae,3GD1A@35493|Streptophyta	35493|Streptophyta	O	NHL repeat-containing protein	-	GO:0005575,GO:0005622,GO:0005623,GO:0005737,GO:0008150,GO:0009314,GO:0009416,GO:0009507,GO:0009532,GO:0009534,GO:0009536,GO:0009570,GO:0009579,GO:0009628,GO:0010196,GO:0016020,GO:0031976,GO:0031984,GO:0034357,GO:0042651,GO:0043226,GO:0043227,GO:0043229,GO:0043231,GO:0044422,GO:0044424,GO:0044434,GO:0044435,GO:0044436,GO:0044444,GO:0044446,GO:0044464,GO:0050896,GO:1990066	-	-	-	-	-	-	-	-	-	-	HAD_2,NHL,Thioredoxin_8
lcl|ORF1_TRINITY_DN9311_c0_g1_i5_39_1085	29760.VIT_14s0060g01030.t01	6.27e-150	456.0	COG0637@1|root,KOG2177@1|root,KOG2177@2759|Eukaryota,KOG2914@2759|Eukaryota,37MAK@33090|Viridiplantae,3GD1A@35493|Streptophyta	35493|Streptophyta	O	NHL repeat-containing protein	-	GO:0005575,GO:0005622,GO:0005623,GO:0005737,GO:0008150,GO:0009314,GO:0009416,GO:0009507,GO:0009532,GO:0009534,GO:0009536,GO:0009570,GO:0009579,GO:0009628,GO:0010196,GO:0016020,GO:0031976,GO:0031984,GO:0034357,GO:0042651,GO:0043226,GO:0043227,GO:0043229,GO:0043231,GO:0044422,GO:0044424,GO:0044434,GO:0044435,GO:0044436,GO:0044444,GO:0044446,GO:0044464,GO:0050896,GO:1990066	-	-	-	-	-	-	-	-	-	-	HAD_2,NHL,Thioredoxin_8
lcl|ORF12_TRINITY_DN8305_c1_g1_i4_3661_2417	29760.VIT_14s0060g01030.t01	1.27e-161	489.0	COG0637@1|root,KOG2177@1|root,KOG2177@2759|Eukaryota,KOG2914@2759|Eukaryota,37MAK@33090|Viridiplantae,3GD1A@35493|Streptophyta	35493|Streptophyta	O	NHL repeat-containing protein	-	GO:0005575,GO:0005622,GO:0005623,GO:0005737,GO:0008150,GO:0009314,GO:0009416,GO:0009507,GO:0009532,GO:0009534,GO:0009536,GO:0009570,GO:0009579,GO:0009628,GO:0010196,GO:0016020,GO:0031976,GO:0031984,GO:0034357,GO:0042651,GO:0043226,GO:0043227,GO:0043229,GO:0043231,GO:0044422,GO:0044424,GO:0044434,GO:0044435,GO:0044436,GO:0044444,GO:0044446,GO:0044464,GO:0050896,GO:1990066	-	-	-	-	-	-	-	-	-	-	HAD_2,NHL,Thioredoxin_8
lcl|ORF4_TRINITY_DN19220_c0_g1_i6_905_258	3988.XP_002520925.1	2.51e-143	412.0	KOG3511@1|root,KOG3511@2759|Eukaryota,37HTK@33090|Viridiplantae,3G9MK@35493|Streptophyta,4JTAG@91835|fabids	35493|Streptophyta	U	Photosystem II stability assembly factor HCF136	HCF136	GO:0005575,GO:0005622,GO:0005623,GO:0005737,GO:0006996,GO:0008150,GO:0009507,GO:0009526,GO:0009532,GO:0009533,GO:0009534,GO:0009535,GO:0009536,GO:0009570,GO:0009579,GO:0009657,GO:0009719,GO:0009725,GO:0009735,GO:0009941,GO:0009987,GO:0010033,GO:0010035,GO:0010038,GO:0016020,GO:0016043,GO:0031967,GO:0031975,GO:0031976,GO:0031977,GO:0031984,GO:0034357,GO:0042221,GO:0042651,GO:0043226,GO:0043227,GO:…	-	-	-	-	-	-	-	-	-	-	PSII_BNR
lcl|ORF6_TRINITY_DN17773_c0_g1_i1_1486_257	3649.evm.model.supercontig_44.38	1.01e-239	666.0	KOG3511@1|root,KOG3511@2759|Eukaryota,37HTK@33090|Viridiplantae,3G9MK@35493|Streptophyta,3HQQ8@3699|Brassicales	35493|Streptophyta	U	Photosystem II stability assembly factor	HCF136	GO:0005575,GO:0005622,GO:0005623,GO:0005737,GO:0006996,GO:0008150,GO:0009507,GO:0009526,GO:0009532,GO:0009533,GO:0009534,GO:0009535,GO:0009536,GO:0009570,GO:0009579,GO:0009657,GO:0009719,GO:0009725,GO:0009735,GO:0009941,GO:0009987,GO:0010033,GO:0010035,GO:0010038,GO:0016020,GO:0016043,GO:0031967,GO:0031975,GO:0031976,GO:0031977,GO:0031984,GO:0034357,GO:0042221,GO:0042651,GO:0043226,GO:0043227,GO:…	-	-	-	-	-	-	-	-	-	-	PSII_BNR
lcl|ORF1_TRINITY_DN59274_c0_g1_i2_99_1325	4432.XP_010249997.1	1.65e-240	667.0	KOG3511@1|root,KOG3511@2759|Eukaryota,37HTK@33090|Viridiplantae,3G9MK@35493|Streptophyta	35493|Streptophyta	U	Photosystem II stability assembly factor HCF136	HCF136	GO:0005575,GO:0005622,GO:0005623,GO:0005737,GO:0006996,GO:0008150,GO:0009507,GO:0009526,GO:0009532,GO:0009533,GO:0009534,GO:0009535,GO:0009536,GO:0009570,GO:0009579,GO:0009657,GO:0009719,GO:0009725,GO:0009735,GO:0009941,GO:0009987,GO:0010033,GO:0010035,GO:0010038,GO:0016020,GO:0016043,GO:0031967,GO:0031975,GO:0031976,GO:0031977,GO:0031984,GO:0034357,GO:0042221,GO:0042651,GO:0043226,GO:0043227,GO:…	-	-	-	-	-	-	-	-	-	-	PSII_BNR
XP_028123735.1	3649.evm.model.supercontig_44.38	1.59e-236	658.0	KOG3511@1|root,KOG3511@2759|Eukaryota,37HTK@33090|Viridiplantae,3G9MK@35493|Streptophyta,3HQQ8@3699|Brassicales	35493|Streptophyta	U	Photosystem II stability assembly factor	HCF136	GO:0005575,GO:0005622,GO:0005623,GO:0005737,GO:0006996,GO:0008150,GO:0009507,GO:0009526,GO:0009532,GO:0009533,GO:0009534,GO:0009535,GO:0009536,GO:0009570,GO:0009579,GO:0009657,GO:0009719,GO:0009725,GO:0009735,GO:0009941,GO:0009987,GO:0010033,GO:0010035,GO:0010038,GO:0016020,GO:0016043,GO:0031967,GO:0031975,GO:0031976,GO:0031977,GO:0031984,GO:0034357,GO:0042221,GO:0042651,GO:0043226,GO:0043227,GO:…	-	-	-	-	-	-	-	-	-	-	PSII_BNR
lcl|ORF5_TRINITY_DN61928_c0_g1_i1_1377_151	4432.XP_010249997.1	3.48e-242	671.0	KOG3511@1|root,KOG3511@2759|Eukaryota,37HTK@33090|Viridiplantae,3G9MK@35493|Streptophyta	35493|Streptophyta	U	Photosystem II stability assembly factor HCF136	HCF136	GO:0005575,GO:0005622,GO:0005623,GO:0005737,GO:0006996,GO:0008150,GO:0009507,GO:0009526,GO:0009532,GO:0009533,GO:0009534,GO:0009535,GO:0009536,GO:0009570,GO:0009579,GO:0009657,GO:0009719,GO:0009725,GO:0009735,GO:0009941,GO:0009987,GO:0010033,GO:0010035,GO:0010038,GO:0016020,GO:0016043,GO:0031967,GO:0031975,GO:0031976,GO:0031977,GO:0031984,GO:0034357,GO:0042221,GO:0042651,GO:0043226,GO:0043227,GO:…	-	-	-	-	-	-	-	-	-	-	PSII_BNR
lcl|ORF2_TRINITY_DN5571_c0_g1_i5_46_1272	4432.XP_010249997.1	7.02e-242	670.0	KOG3511@1|root,KOG3511@2759|Eukaryota,37HTK@33090|Viridiplantae,3G9MK@35493|Streptophyta	35493|Streptophyta	U	Photosystem II stability assembly factor HCF136	HCF136	GO:0005575,GO:0005622,GO:0005623,GO:0005737,GO:0006996,GO:0008150,GO:0009507,GO:0009526,GO:0009532,GO:0009533,GO:0009534,GO:0009535,GO:0009536,GO:0009570,GO:0009579,GO:0009657,GO:0009719,GO:0009725,GO:0009735,GO:0009941,GO:0009987,GO:0010033,GO:0010035,GO:0010038,GO:0016020,GO:0016043,GO:0031967,GO:0031975,GO:0031976,GO:0031977,GO:0031984,GO:0034357,GO:0042221,GO:0042651,GO:0043226,GO:0043227,GO:…	-	-	-	-	-	-	-	-	-	-	PSII_BNR
lcl|ORF7_TRINITY_DN3311_c0_g1_i6_1509_283	4432.XP_010249997.1	3.48e-242	671.0	KOG3511@1|root,KOG3511@2759|Eukaryota,37HTK@33090|Viridiplantae,3G9MK@35493|Streptophyta	35493|Streptophyta	U	Photosystem II stability assembly factor HCF136	HCF136	GO:0005575,GO:0005622,GO:0005623,GO:0005737,GO:0006996,GO:0008150,GO:0009507,GO:0009526,GO:0009532,GO:0009533,GO:0009534,GO:0009535,GO:0009536,GO:0009570,GO:0009579,GO:0009657,GO:0009719,GO:0009725,GO:0009735,GO:0009941,GO:0009987,GO:0010033,GO:0010035,GO:0010038,GO:0016020,GO:0016043,GO:0031967,GO:0031975,GO:0031976,GO:0031977,GO:0031984,GO:0034357,GO:0042221,GO:0042651,GO:0043226,GO:0043227,GO:…	-	-	-	-	-	-	-	-	-	-	PSII_BNR
lcl|ORF5_TRINITY_DN16145_c0_g1_i1_1381_155	4432.XP_010249997.1	2.85e-241	669.0	KOG3511@1|root,KOG3511@2759|Eukaryota,37HTK@33090|Viridiplantae,3G9MK@35493|Streptophyta	35493|Streptophyta	U	Photosystem II stability assembly factor HCF136	HCF136	GO:0005575,GO:0005622,GO:0005623,GO:0005737,GO:0006996,GO:0008150,GO:0009507,GO:0009526,GO:0009532,GO:0009533,GO:0009534,GO:0009535,GO:0009536,GO:0009570,GO:0009579,GO:0009657,GO:0009719,GO:0009725,GO:0009735,GO:0009941,GO:0009987,GO:0010033,GO:0010035,GO:0010038,GO:0016020,GO:0016043,GO:0031967,GO:0031975,GO:0031976,GO:0031977,GO:0031984,GO:0034357,GO:0042221,GO:0042651,GO:0043226,GO:0043227,GO:…	-	-	-	-	-	-	-	-	-	-	PSII_BNR
lcl|ORF6_TRINITY_DN16686_c0_g2_i13_191_2056	102107.XP_008246083.1	0.0	1087.0	COG0637@1|root,KOG2177@1|root,KOG2177@2759|Eukaryota,KOG2914@2759|Eukaryota,37MAK@33090|Viridiplantae,3GD1A@35493|Streptophyta,4JH36@91835|fabids	35493|Streptophyta	O	NHL repeat-containing protein	-	-	-	-	-	-	-	-	-	-	-	-	HAD_2,NHL,Thioredoxin_8
lcl|ORF3_TRINITY_DN22183_c0_g1_i1_191_439	38727.Pavir.Ia04058.1.p	1.41e-22	91.7	KOG2177@1|root,KOG2177@2759|Eukaryota,37MAK@33090|Viridiplantae,3GD1A@35493|Streptophyta,3KUNC@4447|Liliopsida,3I5PF@38820|Poales	35493|Streptophyta	O	Thioredoxin-like	-	GO:0005575,GO:0005622,GO:0005623,GO:0005737,GO:0008150,GO:0009314,GO:0009416,GO:0009507,GO:0009532,GO:0009534,GO:0009536,GO:0009570,GO:0009579,GO:0009628,GO:0010196,GO:0016020,GO:0031976,GO:0031984,GO:0034357,GO:0042651,GO:0043226,GO:0043227,GO:0043229,GO:0043231,GO:0044422,GO:0044424,GO:0044434,GO:0044435,GO:0044436,GO:0044444,GO:0044446,GO:0044464,GO:0050896,GO:1990066	-	-	-	-	-	-	-	-	-	-	HAD_2,NHL,Thioredoxin_8
lcl|ORF1_TRINITY_DN1643_c0_g1_i7_1488_3623	102107.XP_008246083.1	0.0	1238.0	COG0637@1|root,KOG2177@1|root,KOG2177@2759|Eukaryota,KOG2914@2759|Eukaryota,37MAK@33090|Viridiplantae,3GD1A@35493|Streptophyta,4JH36@91835|fabids	35493|Streptophyta	O	NHL repeat-containing protein	-	-	-	-	-	-	-	-	-	-	-	-	HAD_2,NHL,Thioredoxin_8
XP_028061681.1	102107.XP_008246083.1	0.0	1687.0	COG0637@1|root,KOG2177@1|root,KOG2177@2759|Eukaryota,KOG2914@2759|Eukaryota,37MAK@33090|Viridiplantae,3GD1A@35493|Streptophyta,4JH36@91835|fabids	35493|Streptophyta	O	NHL repeat-containing protein	-	-	-	-	-	-	-	-	-	-	-	-	HAD_2,NHL,Thioredoxin_8
lcl|ORF2_TRINITY_DN16287_c0_g1_i4_1623_2372	102107.XP_008246083.1	8.41e-146	441.0	COG0637@1|root,KOG2177@1|root,KOG2177@2759|Eukaryota,KOG2914@2759|Eukaryota,37MAK@33090|Viridiplantae,3GD1A@35493|Streptophyta,4JH36@91835|fabids	35493|Streptophyta	O	NHL repeat-containing protein	-	-	-	-	-	-	-	-	-	-	-	-	HAD_2,NHL,Thioredoxin_8
lcl|ORF6_TRINITY_DN58676_c0_g1_i1_855_7	102107.XP_008246083.1	3.07e-180	532.0	COG0637@1|root,KOG2177@1|root,KOG2177@2759|Eukaryota,KOG2914@2759|Eukaryota,37MAK@33090|Viridiplantae,3GD1A@35493|Streptophyta,4JH36@91835|fabids	35493|Streptophyta	O	NHL repeat-containing protein	-	-	-	-	-	-	-	-	-	-	-	-	HAD_2,NHL,Thioredoxin_8
lcl|ORF10_TRINITY_DN9311_c0_g1_i5_1148_3283	102107.XP_008246083.1	0.0	1234.0	COG0637@1|root,KOG2177@1|root,KOG2177@2759|Eukaryota,KOG2914@2759|Eukaryota,37MAK@33090|Viridiplantae,3GD1A@35493|Streptophyta,4JH36@91835|fabids	35493|Streptophyta	O	NHL repeat-containing protein	-	-	-	-	-	-	-	-	-	-	-	-	HAD_2,NHL,Thioredoxin_8
lcl|ORF19_TRINITY_DN8305_c1_g1_i4_2528_393	102107.XP_008246083.1	0.0	1239.0	COG0637@1|root,KOG2177@1|root,KOG2177@2759|Eukaryota,KOG2914@2759|Eukaryota,37MAK@33090|Viridiplantae,3GD1A@35493|Streptophyta,4JH36@91835|fabids	35493|Streptophyta	O	NHL repeat-containing protein	-	-	-	-	-	-	-	-	-	-	-	-	HAD_2,NHL,Thioredoxin_8
lcl|ORF2_TRINITY_DN1689_c0_g1_i1_138_1232	29760.VIT_14s0060g01100.t01	2.18e-208	582.0	2926D@1|root,2R92T@2759|Eukaryota,37JID@33090|Viridiplantae,3G8IN@35493|Streptophyta	35493|Streptophyta	S	Ethylbenzene dehydrogenase	-	-	-	-	-	-	-	-	-	-	-	-	EB_dh
lcl|ORF8_TRINITY_DN2707_c0_g1_i1_1283_189	29760.VIT_14s0060g01100.t01	2.18e-208	582.0	2926D@1|root,2R92T@2759|Eukaryota,37JID@33090|Viridiplantae,3G8IN@35493|Streptophyta	35493|Streptophyta	S	Ethylbenzene dehydrogenase	-	-	-	-	-	-	-	-	-	-	-	-	EB_dh
lcl|ORF4_TRINITY_DN77169_c0_g1_i2_1299_205	29760.VIT_14s0060g01100.t01	5.11e-207	578.0	2926D@1|root,2R92T@2759|Eukaryota,37JID@33090|Viridiplantae,3G8IN@35493|Streptophyta	35493|Streptophyta	S	Ethylbenzene dehydrogenase	-	-	-	-	-	-	-	-	-	-	-	-	EB_dh
XP_028077195.1	29760.VIT_14s0060g01100.t01	1.53e-208	582.0	2926D@1|root,2R92T@2759|Eukaryota,37JID@33090|Viridiplantae,3G8IN@35493|Streptophyta	35493|Streptophyta	S	Ethylbenzene dehydrogenase	-	-	-	-	-	-	-	-	-	-	-	-	EB_dh
lcl|ORF9_TRINITY_DN2722_c0_g1_i1_1302_208	29760.VIT_14s0060g01100.t01	9.29e-210	585.0	2926D@1|root,2R92T@2759|Eukaryota,37JID@33090|Viridiplantae,3G8IN@35493|Streptophyta	35493|Streptophyta	S	Ethylbenzene dehydrogenase	-	-	-	-	-	-	-	-	-	-	-	-	EB_dh
lcl|ORF10_TRINITY_DN6818_c0_g1_i1_1290_196	29760.VIT_14s0060g01100.t01	1.26e-207	580.0	2926D@1|root,2R92T@2759|Eukaryota,37JID@33090|Viridiplantae,3G8IN@35493|Streptophyta	35493|Streptophyta	S	Ethylbenzene dehydrogenase	-	-	-	-	-	-	-	-	-	-	-	-	EB_dh
lcl|ORF6_TRINITY_DN3519_c0_g1_i1_134_1228	29760.VIT_14s0060g01100.t01	2.18e-208	582.0	2926D@1|root,2R92T@2759|Eukaryota,37JID@33090|Viridiplantae,3G8IN@35493|Streptophyta	35493|Streptophyta	S	Ethylbenzene dehydrogenase	-	-	-	-	-	-	-	-	-	-	-	-	EB_dh
lcl|ORF5_TRINITY_DN6712_c0_g1_i1_1263_169	29760.VIT_14s0060g01100.t01	1.26e-207	580.0	2926D@1|root,2R92T@2759|Eukaryota,37JID@33090|Viridiplantae,3G8IN@35493|Streptophyta	35493|Streptophyta	S	Ethylbenzene dehydrogenase	-	-	-	-	-	-	-	-	-	-	-	-	EB_dh
lcl|ORF1_TRINITY_DN446_c2_g1_i1_43_1242	4432.XP_010241033.1	2.4e-62	213.0	29H7M@1|root,2RQE9@2759|Eukaryota,37S80@33090|Viridiplantae,3GGXG@35493|Streptophyta	35493|Streptophyta	S	Mediator-associated protein 1-like	-	-	-	-	-	-	-	-	-	-	-	-	DUF573
lcl|ORF10_TRINITY_DN7327_c0_g1_i1_1467_268	4432.XP_010241033.1	2.4e-62	213.0	29H7M@1|root,2RQE9@2759|Eukaryota,37S80@33090|Viridiplantae,3GGXG@35493|Streptophyta	35493|Streptophyta	S	Mediator-associated protein 1-like	-	-	-	-	-	-	-	-	-	-	-	-	DUF573
lcl|ORF1_TRINITY_DN2530_c0_g1_i1_46_1245	4432.XP_010241033.1	9.37e-62	212.0	29H7M@1|root,2RQE9@2759|Eukaryota,37S80@33090|Viridiplantae,3GGXG@35493|Streptophyta	35493|Streptophyta	S	Mediator-associated protein 1-like	-	-	-	-	-	-	-	-	-	-	-	-	DUF573
XP_028055999.1	3750.XP_008353581.1	6.41e-61	208.0	29H7M@1|root,2RQE9@2759|Eukaryota,37S80@33090|Viridiplantae,3GGXG@35493|Streptophyta,4JTU9@91835|fabids	35493|Streptophyta	S	Mediator-associated protein 1-like	-	-	-	-	-	-	-	-	-	-	-	-	DUF573
lcl|ORF1_TRINITY_DN13207_c1_g1_i1_69_1268	102107.XP_008245989.1	2.22e-61	211.0	29H7M@1|root,2RQE9@2759|Eukaryota,37S80@33090|Viridiplantae,3GGXG@35493|Streptophyta,4JTU9@91835|fabids	35493|Streptophyta	S	Mediator-associated protein 1-like	-	-	-	-	-	-	-	-	-	-	-	-	DUF573
lcl|ORF2_TRINITY_DN14575_c0_g2_i2_43_1242	4432.XP_010241033.1	1.87e-65	221.0	29H7M@1|root,2RQE9@2759|Eukaryota,37S80@33090|Viridiplantae,3GGXG@35493|Streptophyta	35493|Streptophyta	S	Mediator-associated protein 1-like	-	-	-	-	-	-	-	-	-	-	-	-	DUF573
lcl|ORF1_TRINITY_DN8173_c0_g1_i2_84_1286	4432.XP_010241033.1	1.06e-64	219.0	29H7M@1|root,2RQE9@2759|Eukaryota,37S80@33090|Viridiplantae,3GGXG@35493|Streptophyta	35493|Streptophyta	S	Mediator-associated protein 1-like	-	-	-	-	-	-	-	-	-	-	-	-	DUF573
lcl|ORF5_TRINITY_DN658_c0_g1_i1_53_1258	4432.XP_010241033.1	7.76e-65	220.0	29H7M@1|root,2RQE9@2759|Eukaryota,37S80@33090|Viridiplantae,3GGXG@35493|Streptophyta	35493|Streptophyta	S	Mediator-associated protein 1-like	-	-	-	-	-	-	-	-	-	-	-	-	DUF573
lcl|ORF13_TRINITY_DN496_c0_g1_i18_2587_1214	29760.VIT_18s0001g05780.t01	2.45e-186	542.0	COG4886@1|root,KOG0531@2759|Eukaryota,37RPZ@33090|Viridiplantae,3GBNR@35493|Streptophyta	35493|Streptophyta	T	Leucine-rich repeats, typical (most populated) subfamily	-	GO:0000226,GO:0001578,GO:0001889,GO:0001947,GO:0002009,GO:0003002,GO:0003007,GO:0003143,GO:0003341,GO:0003352,GO:0003356,GO:0003674,GO:0005488,GO:0005575,GO:0005622,GO:0005623,GO:0005634,GO:0005654,GO:0005737,GO:0005829,GO:0005856,GO:0005886,GO:0005929,GO:0005930,GO:0006928,GO:0006996,GO:0007010,GO:0007017,GO:0007018,GO:0007275,GO:0007368,GO:0007389,GO:0007507,GO:0008150,GO:0009653,GO:0009790,GO:…	-	ko:K17550,ko:K19750	-	-	-	-	ko00000,ko01009,ko04812	-	-	-	LRR_4,LRR_6,LRR_8
lcl|ORF9_TRINITY_DN1108_c0_g1_i1_470_1843	29760.VIT_18s0001g05780.t01	1.13e-184	538.0	COG4886@1|root,KOG0531@2759|Eukaryota,37RPZ@33090|Viridiplantae,3GBNR@35493|Streptophyta	35493|Streptophyta	T	Leucine-rich repeats, typical (most populated) subfamily	-	GO:0000226,GO:0001578,GO:0001889,GO:0001947,GO:0002009,GO:0003002,GO:0003007,GO:0003143,GO:0003341,GO:0003352,GO:0003356,GO:0003674,GO:0005488,GO:0005575,GO:0005622,GO:0005623,GO:0005634,GO:0005654,GO:0005737,GO:0005829,GO:0005856,GO:0005886,GO:0005929,GO:0005930,GO:0006928,GO:0006996,GO:0007010,GO:0007017,GO:0007018,GO:0007275,GO:0007368,GO:0007389,GO:0007507,GO:0008150,GO:0009653,GO:0009790,GO:…	-	ko:K17550,ko:K19750	-	-	-	-	ko00000,ko01009,ko04812	-	-	-	LRR_4,LRR_6,LRR_8
lcl|ORF9_TRINITY_DN4464_c0_g2_i4_566_1945	29760.VIT_18s0001g05780.t01	3.74e-186	542.0	COG4886@1|root,KOG0531@2759|Eukaryota,37RPZ@33090|Viridiplantae,3GBNR@35493|Streptophyta	35493|Streptophyta	T	Leucine-rich repeats, typical (most populated) subfamily	-	GO:0000226,GO:0001578,GO:0001889,GO:0001947,GO:0002009,GO:0003002,GO:0003007,GO:0003143,GO:0003341,GO:0003352,GO:0003356,GO:0003674,GO:0005488,GO:0005575,GO:0005622,GO:0005623,GO:0005634,GO:0005654,GO:0005737,GO:0005829,GO:0005856,GO:0005886,GO:0005929,GO:0005930,GO:0006928,GO:0006996,GO:0007010,GO:0007017,GO:0007018,GO:0007275,GO:0007368,GO:0007389,GO:0007507,GO:0008150,GO:0009653,GO:0009790,GO:…	-	ko:K17550,ko:K19750	-	-	-	-	ko00000,ko01009,ko04812	-	-	-	LRR_4,LRR_6,LRR_8
XP_028120474.1	29760.VIT_18s0001g05780.t01	2.42e-280	790.0	COG4886@1|root,KOG0531@2759|Eukaryota,37RPZ@33090|Viridiplantae,3GBNR@35493|Streptophyta	35493|Streptophyta	T	Leucine-rich repeats, typical (most populated) subfamily	-	GO:0000226,GO:0001578,GO:0001889,GO:0001947,GO:0002009,GO:0003002,GO:0003007,GO:0003143,GO:0003341,GO:0003352,GO:0003356,GO:0003674,GO:0005488,GO:0005575,GO:0005622,GO:0005623,GO:0005634,GO:0005654,GO:0005737,GO:0005829,GO:0005856,GO:0005886,GO:0005929,GO:0005930,GO:0006928,GO:0006996,GO:0007010,GO:0007017,GO:0007018,GO:0007275,GO:0007368,GO:0007389,GO:0007507,GO:0008150,GO:0009653,GO:0009790,GO:…	-	ko:K17550,ko:K19750	-	-	-	-	ko00000,ko01009,ko04812	-	-	-	LRR_4,LRR_6,LRR_8
lcl|ORF8_TRINITY_DN5259_c0_g2_i2_518_2557	29760.VIT_18s0001g05780.t01	1.49e-279	788.0	COG4886@1|root,KOG0531@2759|Eukaryota,37RPZ@33090|Viridiplantae,3GBNR@35493|Streptophyta	35493|Streptophyta	T	Leucine-rich repeats, typical (most populated) subfamily	-	GO:0000226,GO:0001578,GO:0001889,GO:0001947,GO:0002009,GO:0003002,GO:0003007,GO:0003143,GO:0003341,GO:0003352,GO:0003356,GO:0003674,GO:0005488,GO:0005575,GO:0005622,GO:0005623,GO:0005634,GO:0005654,GO:0005737,GO:0005829,GO:0005856,GO:0005886,GO:0005929,GO:0005930,GO:0006928,GO:0006996,GO:0007010,GO:0007017,GO:0007018,GO:0007275,GO:0007368,GO:0007389,GO:0007507,GO:0008150,GO:0009653,GO:0009790,GO:…	-	ko:K17550,ko:K19750	-	-	-	-	ko00000,ko01009,ko04812	-	-	-	LRR_4,LRR_6,LRR_8
lcl|ORF20_TRINITY_DN10310_c0_g1_i6_2425_1049	29760.VIT_18s0001g05780.t01	2.54e-186	542.0	COG4886@1|root,KOG0531@2759|Eukaryota,37RPZ@33090|Viridiplantae,3GBNR@35493|Streptophyta	35493|Streptophyta	T	Leucine-rich repeats, typical (most populated) subfamily	-	GO:0000226,GO:0001578,GO:0001889,GO:0001947,GO:0002009,GO:0003002,GO:0003007,GO:0003143,GO:0003341,GO:0003352,GO:0003356,GO:0003674,GO:0005488,GO:0005575,GO:0005622,GO:0005623,GO:0005634,GO:0005654,GO:0005737,GO:0005829,GO:0005856,GO:0005886,GO:0005929,GO:0005930,GO:0006928,GO:0006996,GO:0007010,GO:0007017,GO:0007018,GO:0007275,GO:0007368,GO:0007389,GO:0007507,GO:0008150,GO:0009653,GO:0009790,GO:…	-	ko:K17550,ko:K19750	-	-	-	-	ko00000,ko01009,ko04812	-	-	-	LRR_4,LRR_6,LRR_8
lcl|ORF11_TRINITY_DN3968_c0_g1_i2_581_2653	29760.VIT_18s0001g05780.t01	4.07e-260	739.0	COG4886@1|root,KOG0531@2759|Eukaryota,37RPZ@33090|Viridiplantae,3GBNR@35493|Streptophyta	35493|Streptophyta	T	Leucine-rich repeats, typical (most populated) subfamily	-	GO:0000226,GO:0001578,GO:0001889,GO:0001947,GO:0002009,GO:0003002,GO:0003007,GO:0003143,GO:0003341,GO:0003352,GO:0003356,GO:0003674,GO:0005488,GO:0005575,GO:0005622,GO:0005623,GO:0005634,GO:0005654,GO:0005737,GO:0005829,GO:0005856,GO:0005886,GO:0005929,GO:0005930,GO:0006928,GO:0006996,GO:0007010,GO:0007017,GO:0007018,GO:0007275,GO:0007368,GO:0007389,GO:0007507,GO:0008150,GO:0009653,GO:0009790,GO:…	-	ko:K17550,ko:K19750	-	-	-	-	ko00000,ko01009,ko04812	-	-	-	LRR_4,LRR_6,LRR_8
lcl|ORF12_TRINITY_DN2289_c1_g1_i6_2484_454	29760.VIT_18s0001g05780.t01	3.3e-280	790.0	COG4886@1|root,KOG0531@2759|Eukaryota,37RPZ@33090|Viridiplantae,3GBNR@35493|Streptophyta	35493|Streptophyta	T	Leucine-rich repeats, typical (most populated) subfamily	-	GO:0000226,GO:0001578,GO:0001889,GO:0001947,GO:0002009,GO:0003002,GO:0003007,GO:0003143,GO:0003341,GO:0003352,GO:0003356,GO:0003674,GO:0005488,GO:0005575,GO:0005622,GO:0005623,GO:0005634,GO:0005654,GO:0005737,GO:0005829,GO:0005856,GO:0005886,GO:0005929,GO:0005930,GO:0006928,GO:0006996,GO:0007010,GO:0007017,GO:0007018,GO:0007275,GO:0007368,GO:0007389,GO:0007507,GO:0008150,GO:0009653,GO:0009790,GO:…	-	ko:K17550,ko:K19750	-	-	-	-	ko00000,ko01009,ko04812	-	-	-	LRR_4,LRR_6,LRR_8
lcl|ORF6_TRINITY_DN10377_c0_g1_i2_29_1456	4432.XP_010256395.1	1.02e-160	471.0	KOG4197@1|root,KOG4197@2759|Eukaryota,37SS7@33090|Viridiplantae,3GCF6@35493|Streptophyta	35493|Streptophyta	S	Pentatricopeptide repeat-containing protein	-	GO:0003674,GO:0003676,GO:0003723,GO:0003824,GO:0004518,GO:0004519,GO:0005488,GO:0005575,GO:0005622,GO:0005623,GO:0006139,GO:0006725,GO:0006807,GO:0008150,GO:0008152,GO:0009451,GO:0009987,GO:0016070,GO:0016787,GO:0016788,GO:0034641,GO:0043170,GO:0043226,GO:0043227,GO:0043229,GO:0043231,GO:0043412,GO:0044237,GO:0044238,GO:0044424,GO:0044464,GO:0046483,GO:0071704,GO:0090304,GO:0090305,GO:0097159,GO:…	-	-	-	-	-	-	-	-	-	-	PPR,PPR_2,PPR_3
lcl|ORF5_TRINITY_DN7293_c0_g1_i3_68_1495	4432.XP_010256395.1	4.12e-160	469.0	KOG4197@1|root,KOG4197@2759|Eukaryota,37SS7@33090|Viridiplantae,3GCF6@35493|Streptophyta	35493|Streptophyta	S	Pentatricopeptide repeat-containing protein	-	GO:0003674,GO:0003676,GO:0003723,GO:0003824,GO:0004518,GO:0004519,GO:0005488,GO:0005575,GO:0005622,GO:0005623,GO:0006139,GO:0006725,GO:0006807,GO:0008150,GO:0008152,GO:0009451,GO:0009987,GO:0016070,GO:0016787,GO:0016788,GO:0034641,GO:0043170,GO:0043226,GO:0043227,GO:0043229,GO:0043231,GO:0043412,GO:0044237,GO:0044238,GO:0044424,GO:0044464,GO:0046483,GO:0071704,GO:0090304,GO:0090305,GO:0097159,GO:…	-	-	-	-	-	-	-	-	-	-	PPR,PPR_2,PPR_3
lcl|ORF1_TRINITY_DN51549_c0_g2_i2_168_1595	4432.XP_010256395.1	1.26e-161	473.0	KOG4197@1|root,KOG4197@2759|Eukaryota,37SS7@33090|Viridiplantae,3GCF6@35493|Streptophyta	35493|Streptophyta	S	Pentatricopeptide repeat-containing protein	-	GO:0003674,GO:0003676,GO:0003723,GO:0003824,GO:0004518,GO:0004519,GO:0005488,GO:0005575,GO:0005622,GO:0005623,GO:0006139,GO:0006725,GO:0006807,GO:0008150,GO:0008152,GO:0009451,GO:0009987,GO:0016070,GO:0016787,GO:0016788,GO:0034641,GO:0043170,GO:0043226,GO:0043227,GO:0043229,GO:0043231,GO:0043412,GO:0044237,GO:0044238,GO:0044424,GO:0044464,GO:0046483,GO:0071704,GO:0090304,GO:0090305,GO:0097159,GO:…	-	-	-	-	-	-	-	-	-	-	PPR,PPR_2,PPR_3
XP_028124065.1	4432.XP_010256395.1	2.54e-161	472.0	KOG4197@1|root,KOG4197@2759|Eukaryota,37SS7@33090|Viridiplantae,3GCF6@35493|Streptophyta	35493|Streptophyta	S	Pentatricopeptide repeat-containing protein	-	GO:0003674,GO:0003676,GO:0003723,GO:0003824,GO:0004518,GO:0004519,GO:0005488,GO:0005575,GO:0005622,GO:0005623,GO:0006139,GO:0006725,GO:0006807,GO:0008150,GO:0008152,GO:0009451,GO:0009987,GO:0016070,GO:0016787,GO:0016788,GO:0034641,GO:0043170,GO:0043226,GO:0043227,GO:0043229,GO:0043231,GO:0043412,GO:0044237,GO:0044238,GO:0044424,GO:0044464,GO:0046483,GO:0071704,GO:0090304,GO:0090305,GO:0097159,GO:…	-	-	-	-	-	-	-	-	-	-	PPR,PPR_2,PPR_3
lcl|ORF11_TRINITY_DN54385_c0_g1_i1_2167_740	4432.XP_010256395.1	5.1e-161	471.0	KOG4197@1|root,KOG4197@2759|Eukaryota,37SS7@33090|Viridiplantae,3GCF6@35493|Streptophyta	35493|Streptophyta	S	Pentatricopeptide repeat-containing protein	-	GO:0003674,GO:0003676,GO:0003723,GO:0003824,GO:0004518,GO:0004519,GO:0005488,GO:0005575,GO:0005622,GO:0005623,GO:0006139,GO:0006725,GO:0006807,GO:0008150,GO:0008152,GO:0009451,GO:0009987,GO:0016070,GO:0016787,GO:0016788,GO:0034641,GO:0043170,GO:0043226,GO:0043227,GO:0043229,GO:0043231,GO:0043412,GO:0044237,GO:0044238,GO:0044424,GO:0044464,GO:0046483,GO:0071704,GO:0090304,GO:0090305,GO:0097159,GO:…	-	-	-	-	-	-	-	-	-	-	PPR,PPR_2,PPR_3
lcl|ORF1_TRINITY_DN25296_c0_g2_i1_504_1931	4432.XP_010256395.1	1.26e-161	473.0	KOG4197@1|root,KOG4197@2759|Eukaryota,37SS7@33090|Viridiplantae,3GCF6@35493|Streptophyta	35493|Streptophyta	S	Pentatricopeptide repeat-containing protein	-	GO:0003674,GO:0003676,GO:0003723,GO:0003824,GO:0004518,GO:0004519,GO:0005488,GO:0005575,GO:0005622,GO:0005623,GO:0006139,GO:0006725,GO:0006807,GO:0008150,GO:0008152,GO:0009451,GO:0009987,GO:0016070,GO:0016787,GO:0016788,GO:0034641,GO:0043170,GO:0043226,GO:0043227,GO:0043229,GO:0043231,GO:0043412,GO:0044237,GO:0044238,GO:0044424,GO:0044464,GO:0046483,GO:0071704,GO:0090304,GO:0090305,GO:0097159,GO:…	-	-	-	-	-	-	-	-	-	-	PPR,PPR_2,PPR_3
lcl|ORF13_TRINITY_DN21067_c0_g1_i3_2230_803	4432.XP_010256395.1	2.54e-161	472.0	KOG4197@1|root,KOG4197@2759|Eukaryota,37SS7@33090|Viridiplantae,3GCF6@35493|Streptophyta	35493|Streptophyta	S	Pentatricopeptide repeat-containing protein	-	GO:0003674,GO:0003676,GO:0003723,GO:0003824,GO:0004518,GO:0004519,GO:0005488,GO:0005575,GO:0005622,GO:0005623,GO:0006139,GO:0006725,GO:0006807,GO:0008150,GO:0008152,GO:0009451,GO:0009987,GO:0016070,GO:0016787,GO:0016788,GO:0034641,GO:0043170,GO:0043226,GO:0043227,GO:0043229,GO:0043231,GO:0043412,GO:0044237,GO:0044238,GO:0044424,GO:0044464,GO:0046483,GO:0071704,GO:0090304,GO:0090305,GO:0097159,GO:…	-	-	-	-	-	-	-	-	-	-	PPR,PPR_2,PPR_3
lcl|ORF2_TRINITY_DN15877_c0_g1_i1_546_1973	4432.XP_010256395.1	7.22e-161	471.0	KOG4197@1|root,KOG4197@2759|Eukaryota,37SS7@33090|Viridiplantae,3GCF6@35493|Streptophyta	35493|Streptophyta	S	Pentatricopeptide repeat-containing protein	-	GO:0003674,GO:0003676,GO:0003723,GO:0003824,GO:0004518,GO:0004519,GO:0005488,GO:0005575,GO:0005622,GO:0005623,GO:0006139,GO:0006725,GO:0006807,GO:0008150,GO:0008152,GO:0009451,GO:0009987,GO:0016070,GO:0016787,GO:0016788,GO:0034641,GO:0043170,GO:0043226,GO:0043227,GO:0043229,GO:0043231,GO:0043412,GO:0044237,GO:0044238,GO:0044424,GO:0044464,GO:0046483,GO:0071704,GO:0090304,GO:0090305,GO:0097159,GO:…	-	-	-	-	-	-	-	-	-	-	PPR,PPR_2,PPR_3
lcl|ORF9_TRINITY_DN10325_c0_g1_i4_2105_150	29760.VIT_19s0093g00480.t01	1.72e-169	502.0	COG0545@1|root,KOG0552@2759|Eukaryota,37I1N@33090|Viridiplantae,3GBVQ@35493|Streptophyta	35493|Streptophyta	O	Peptidyl-prolyl cis-trans isomerase	-	GO:0003674,GO:0005488,GO:0005515,GO:0005575,GO:0005622,GO:0005623,GO:0005634,GO:0005730,GO:0005737,GO:0005829,GO:0006323,GO:0006325,GO:0006333,GO:0006334,GO:0006996,GO:0008150,GO:0009987,GO:0016043,GO:0022607,GO:0031497,GO:0031974,GO:0031981,GO:0034622,GO:0034728,GO:0042393,GO:0043226,GO:0043227,GO:0043228,GO:0043229,GO:0043231,GO:0043232,GO:0043233,GO:0043933,GO:0044085,GO:0044422,GO:0044424,GO:…	5.2.1.8	ko:K14826	-	-	-	-	ko00000,ko01000,ko03009	-	-	-	FKBP_C
lcl|ORF9_TRINITY_DN45159_c0_g1_i1_2295_340	29760.VIT_19s0093g00480.t01	7.11e-166	493.0	COG0545@1|root,KOG0552@2759|Eukaryota,37I1N@33090|Viridiplantae,3GBVQ@35493|Streptophyta	35493|Streptophyta	O	Peptidyl-prolyl cis-trans isomerase	-	GO:0003674,GO:0005488,GO:0005515,GO:0005575,GO:0005622,GO:0005623,GO:0005634,GO:0005730,GO:0005737,GO:0005829,GO:0006323,GO:0006325,GO:0006333,GO:0006334,GO:0006996,GO:0008150,GO:0009987,GO:0016043,GO:0022607,GO:0031497,GO:0031974,GO:0031981,GO:0034622,GO:0034728,GO:0042393,GO:0043226,GO:0043227,GO:0043228,GO:0043229,GO:0043231,GO:0043232,GO:0043233,GO:0043933,GO:0044085,GO:0044422,GO:0044424,GO:…	5.2.1.8	ko:K14826	-	-	-	-	ko00000,ko01000,ko03009	-	-	-	FKBP_C
XP_028097618.1	29760.VIT_19s0093g00480.t01	5.52e-168	498.0	COG0545@1|root,KOG0552@2759|Eukaryota,37I1N@33090|Viridiplantae,3GBVQ@35493|Streptophyta	35493|Streptophyta	O	Peptidyl-prolyl cis-trans isomerase	-	GO:0003674,GO:0005488,GO:0005515,GO:0005575,GO:0005622,GO:0005623,GO:0005634,GO:0005730,GO:0005737,GO:0005829,GO:0006323,GO:0006325,GO:0006333,GO:0006334,GO:0006996,GO:0008150,GO:0009987,GO:0016043,GO:0022607,GO:0031497,GO:0031974,GO:0031981,GO:0034622,GO:0034728,GO:0042393,GO:0043226,GO:0043227,GO:0043228,GO:0043229,GO:0043231,GO:0043232,GO:0043233,GO:0043933,GO:0044085,GO:0044422,GO:0044424,GO:…	5.2.1.8	ko:K14826	-	-	-	-	ko00000,ko01000,ko03009	-	-	-	FKBP_C
lcl|ORF1_TRINITY_DN5271_c0_g4_i1_94_2049	29760.VIT_19s0093g00480.t01	6.06e-170	503.0	COG0545@1|root,KOG0552@2759|Eukaryota,37I1N@33090|Viridiplantae,3GBVQ@35493|Streptophyta	35493|Streptophyta	O	Peptidyl-prolyl cis-trans isomerase	-	GO:0003674,GO:0005488,GO:0005515,GO:0005575,GO:0005622,GO:0005623,GO:0005634,GO:0005730,GO:0005737,GO:0005829,GO:0006323,GO:0006325,GO:0006333,GO:0006334,GO:0006996,GO:0008150,GO:0009987,GO:0016043,GO:0022607,GO:0031497,GO:0031974,GO:0031981,GO:0034622,GO:0034728,GO:0042393,GO:0043226,GO:0043227,GO:0043228,GO:0043229,GO:0043231,GO:0043232,GO:0043233,GO:0043933,GO:0044085,GO:0044422,GO:0044424,GO:…	5.2.1.8	ko:K14826	-	-	-	-	ko00000,ko01000,ko03009	-	-	-	FKBP_C
lcl|ORF1_TRINITY_DN1855_c0_g2_i2_82_2037	29760.VIT_19s0093g00480.t01	2.43e-169	502.0	COG0545@1|root,KOG0552@2759|Eukaryota,37I1N@33090|Viridiplantae,3GBVQ@35493|Streptophyta	35493|Streptophyta	O	Peptidyl-prolyl cis-trans isomerase	-	GO:0003674,GO:0005488,GO:0005515,GO:0005575,GO:0005622,GO:0005623,GO:0005634,GO:0005730,GO:0005737,GO:0005829,GO:0006323,GO:0006325,GO:0006333,GO:0006334,GO:0006996,GO:0008150,GO:0009987,GO:0016043,GO:0022607,GO:0031497,GO:0031974,GO:0031981,GO:0034622,GO:0034728,GO:0042393,GO:0043226,GO:0043227,GO:0043228,GO:0043229,GO:0043231,GO:0043232,GO:0043233,GO:0043933,GO:0044085,GO:0044422,GO:0044424,GO:…	5.2.1.8	ko:K14826	-	-	-	-	ko00000,ko01000,ko03009	-	-	-	FKBP_C
lcl|ORF1_TRINITY_DN13059_c0_g1_i1_75_2033	29760.VIT_19s0093g00480.t01	1.77e-169	502.0	COG0545@1|root,KOG0552@2759|Eukaryota,37I1N@33090|Viridiplantae,3GBVQ@35493|Streptophyta	35493|Streptophyta	O	Peptidyl-prolyl cis-trans isomerase	-	GO:0003674,GO:0005488,GO:0005515,GO:0005575,GO:0005622,GO:0005623,GO:0005634,GO:0005730,GO:0005737,GO:0005829,GO:0006323,GO:0006325,GO:0006333,GO:0006334,GO:0006996,GO:0008150,GO:0009987,GO:0016043,GO:0022607,GO:0031497,GO:0031974,GO:0031981,GO:0034622,GO:0034728,GO:0042393,GO:0043226,GO:0043227,GO:0043228,GO:0043229,GO:0043231,GO:0043232,GO:0043233,GO:0043933,GO:0044085,GO:0044422,GO:0044424,GO:…	5.2.1.8	ko:K14826	-	-	-	-	ko00000,ko01000,ko03009	-	-	-	FKBP_C
lcl|ORF16_TRINITY_DN5559_c0_g1_i1_2486_306	29760.VIT_05s0049g00960.t01	0.0	1011.0	COG0415@1|root,KOG0133@2759|Eukaryota,37JTK@33090|Viridiplantae,3GGIT@35493|Streptophyta	35493|Streptophyta	LT	circadian regulation of calcium ion oscillation	CRY2	GO:0000003,GO:0000166,GO:0001101,GO:0002252,GO:0002376,GO:0003006,GO:0003674,GO:0005488,GO:0005515,GO:0005524,GO:0005575,GO:0005622,GO:0005623,GO:0005634,GO:0005654,GO:0005737,GO:0005773,GO:0006139,GO:0006325,GO:0006338,GO:0006725,GO:0006732,GO:0006753,GO:0006793,GO:0006796,GO:0006807,GO:0006873,GO:0006874,GO:0006875,GO:0006950,GO:0006952,GO:0006996,GO:0007154,GO:0007165,GO:0007275,GO:0007623,GO:…	-	ko:K12119	ko04712,map04712	-	-	-	ko00000,ko00001	-	-	-	DNA_photolyase,FAD_binding_7
lcl|ORF20_TRINITY_DN7718_c0_g1_i2_2367_424	29760.VIT_05s0049g00960.t01	0.0	1009.0	COG0415@1|root,KOG0133@2759|Eukaryota,37JTK@33090|Viridiplantae,3GGIT@35493|Streptophyta	35493|Streptophyta	LT	circadian regulation of calcium ion oscillation	CRY2	GO:0000003,GO:0000166,GO:0001101,GO:0002252,GO:0002376,GO:0003006,GO:0003674,GO:0005488,GO:0005515,GO:0005524,GO:0005575,GO:0005622,GO:0005623,GO:0005634,GO:0005654,GO:0005737,GO:0005773,GO:0006139,GO:0006325,GO:0006338,GO:0006725,GO:0006732,GO:0006753,GO:0006793,GO:0006796,GO:0006807,GO:0006873,GO:0006874,GO:0006875,GO:0006950,GO:0006952,GO:0006996,GO:0007154,GO:0007165,GO:0007275,GO:0007623,GO:…	-	ko:K12119	ko04712,map04712	-	-	-	ko00000,ko00001	-	-	-	DNA_photolyase,FAD_binding_7
lcl|ORF8_TRINITY_DN26104_c0_g1_i4_968_2911	29760.VIT_05s0049g00960.t01	0.0	1013.0	COG0415@1|root,KOG0133@2759|Eukaryota,37JTK@33090|Viridiplantae,3GGIT@35493|Streptophyta	35493|Streptophyta	LT	circadian regulation of calcium ion oscillation	CRY2	GO:0000003,GO:0000166,GO:0001101,GO:0002252,GO:0002376,GO:0003006,GO:0003674,GO:0005488,GO:0005515,GO:0005524,GO:0005575,GO:0005622,GO:0005623,GO:0005634,GO:0005654,GO:0005737,GO:0005773,GO:0006139,GO:0006325,GO:0006338,GO:0006725,GO:0006732,GO:0006753,GO:0006793,GO:0006796,GO:0006807,GO:0006873,GO:0006874,GO:0006875,GO:0006950,GO:0006952,GO:0006996,GO:0007154,GO:0007165,GO:0007275,GO:0007623,GO:…	-	ko:K12119	ko04712,map04712	-	-	-	ko00000,ko00001	-	-	-	DNA_photolyase,FAD_binding_7
XP_028127108.1	29760.VIT_05s0049g00960.t01	0.0	1006.0	COG0415@1|root,KOG0133@2759|Eukaryota,37JTK@33090|Viridiplantae,3GGIT@35493|Streptophyta	35493|Streptophyta	LT	circadian regulation of calcium ion oscillation	CRY2	GO:0000003,GO:0000166,GO:0001101,GO:0002252,GO:0002376,GO:0003006,GO:0003674,GO:0005488,GO:0005515,GO:0005524,GO:0005575,GO:0005622,GO:0005623,GO:0005634,GO:0005654,GO:0005737,GO:0005773,GO:0006139,GO:0006325,GO:0006338,GO:0006725,GO:0006732,GO:0006753,GO:0006793,GO:0006796,GO:0006807,GO:0006873,GO:0006874,GO:0006875,GO:0006950,GO:0006952,GO:0006996,GO:0007154,GO:0007165,GO:0007275,GO:0007623,GO:…	-	ko:K12119	ko04712,map04712	-	-	-	ko00000,ko00001	-	-	-	DNA_photolyase,FAD_binding_7
lcl|ORF18_TRINITY_DN1969_c0_g1_i1_2290_347	29760.VIT_05s0049g00960.t01	0.0	1009.0	COG0415@1|root,KOG0133@2759|Eukaryota,37JTK@33090|Viridiplantae,3GGIT@35493|Streptophyta	35493|Streptophyta	LT	circadian regulation of calcium ion oscillation	CRY2	GO:0000003,GO:0000166,GO:0001101,GO:0002252,GO:0002376,GO:0003006,GO:0003674,GO:0005488,GO:0005515,GO:0005524,GO:0005575,GO:0005622,GO:0005623,GO:0005634,GO:0005654,GO:0005737,GO:0005773,GO:0006139,GO:0006325,GO:0006338,GO:0006725,GO:0006732,GO:0006753,GO:0006793,GO:0006796,GO:0006807,GO:0006873,GO:0006874,GO:0006875,GO:0006950,GO:0006952,GO:0006996,GO:0007154,GO:0007165,GO:0007275,GO:0007623,GO:…	-	ko:K12119	ko04712,map04712	-	-	-	ko00000,ko00001	-	-	-	DNA_photolyase,FAD_binding_7
lcl|ORF3_TRINITY_DN4142_c0_g1_i5_883_2826	29760.VIT_05s0049g00960.t01	0.0	1012.0	COG0415@1|root,KOG0133@2759|Eukaryota,37JTK@33090|Viridiplantae,3GGIT@35493|Streptophyta	35493|Streptophyta	LT	circadian regulation of calcium ion oscillation	CRY2	GO:0000003,GO:0000166,GO:0001101,GO:0002252,GO:0002376,GO:0003006,GO:0003674,GO:0005488,GO:0005515,GO:0005524,GO:0005575,GO:0005622,GO:0005623,GO:0005634,GO:0005654,GO:0005737,GO:0005773,GO:0006139,GO:0006325,GO:0006338,GO:0006725,GO:0006732,GO:0006753,GO:0006793,GO:0006796,GO:0006807,GO:0006873,GO:0006874,GO:0006875,GO:0006950,GO:0006952,GO:0006996,GO:0007154,GO:0007165,GO:0007275,GO:0007623,GO:…	-	ko:K12119	ko04712,map04712	-	-	-	ko00000,ko00001	-	-	-	DNA_photolyase,FAD_binding_7
lcl|ORF22_TRINITY_DN7369_c0_g1_i3_2327_384	29760.VIT_05s0049g00960.t01	0.0	1012.0	COG0415@1|root,KOG0133@2759|Eukaryota,37JTK@33090|Viridiplantae,3GGIT@35493|Streptophyta	35493|Streptophyta	LT	circadian regulation of calcium ion oscillation	CRY2	GO:0000003,GO:0000166,GO:0001101,GO:0002252,GO:0002376,GO:0003006,GO:0003674,GO:0005488,GO:0005515,GO:0005524,GO:0005575,GO:0005622,GO:0005623,GO:0005634,GO:0005654,GO:0005737,GO:0005773,GO:0006139,GO:0006325,GO:0006338,GO:0006725,GO:0006732,GO:0006753,GO:0006793,GO:0006796,GO:0006807,GO:0006873,GO:0006874,GO:0006875,GO:0006950,GO:0006952,GO:0006996,GO:0007154,GO:0007165,GO:0007275,GO:0007623,GO:…	-	ko:K12119	ko04712,map04712	-	-	-	ko00000,ko00001	-	-	-	DNA_photolyase,FAD_binding_7
lcl|ORF6_TRINITY_DN3618_c0_g1_i2_911_2854	29760.VIT_05s0049g00960.t01	0.0	1012.0	COG0415@1|root,KOG0133@2759|Eukaryota,37JTK@33090|Viridiplantae,3GGIT@35493|Streptophyta	35493|Streptophyta	LT	circadian regulation of calcium ion oscillation	CRY2	GO:0000003,GO:0000166,GO:0001101,GO:0002252,GO:0002376,GO:0003006,GO:0003674,GO:0005488,GO:0005515,GO:0005524,GO:0005575,GO:0005622,GO:0005623,GO:0005634,GO:0005654,GO:0005737,GO:0005773,GO:0006139,GO:0006325,GO:0006338,GO:0006725,GO:0006732,GO:0006753,GO:0006793,GO:0006796,GO:0006807,GO:0006873,GO:0006874,GO:0006875,GO:0006950,GO:0006952,GO:0006996,GO:0007154,GO:0007165,GO:0007275,GO:0007623,GO:…	-	ko:K12119	ko04712,map04712	-	-	-	ko00000,ko00001	-	-	-	DNA_photolyase,FAD_binding_7
lcl|ORF4_TRINITY_DN5520_c0_g1_i3_541_176	4081.Solyc04g054510.2.1	3.71e-58	182.0	COG1594@1|root,KOG2907@2759|Eukaryota,37VWR@33090|Viridiplantae,3GKAJ@35493|Streptophyta,44K9P@71274|asterids	35493|Streptophyta	K	DNA-dependent RNA polymerase catalyzes the transcription of DNA into RNA using the four ribonucleoside triphosphates as substrates	-	-	-	ko:K03000	ko00230,ko00240,ko01100,ko03020,map00230,map00240,map01100,map03020	M00182	R00435,R00441,R00442,R00443	RC02795	br01611,ko00000,ko00001,ko00002,ko03021	-	-	-	TFIIS_C
lcl|ORF7_TRINITY_DN4801_c0_g1_i2_585_340	4081.Solyc04g054510.2.1	1.41e-33	118.0	COG1594@1|root,KOG2907@2759|Eukaryota,37VWR@33090|Viridiplantae,3GKAJ@35493|Streptophyta,44K9P@71274|asterids	35493|Streptophyta	K	DNA-dependent RNA polymerase catalyzes the transcription of DNA into RNA using the four ribonucleoside triphosphates as substrates	-	-	-	ko:K03000	ko00230,ko00240,ko01100,ko03020,map00230,map00240,map01100,map03020	M00182	R00435,R00441,R00442,R00443	RC02795	br01611,ko00000,ko00001,ko00002,ko03021	-	-	-	TFIIS_C
lcl|ORF3_TRINITY_DN9138_c0_g1_i1_152_397	4081.Solyc04g054510.2.1	8.57e-35	121.0	COG1594@1|root,KOG2907@2759|Eukaryota,37VWR@33090|Viridiplantae,3GKAJ@35493|Streptophyta,44K9P@71274|asterids	35493|Streptophyta	K	DNA-dependent RNA polymerase catalyzes the transcription of DNA into RNA using the four ribonucleoside triphosphates as substrates	-	-	-	ko:K03000	ko00230,ko00240,ko01100,ko03020,map00230,map00240,map01100,map03020	M00182	R00435,R00441,R00442,R00443	RC02795	br01611,ko00000,ko00001,ko00002,ko03021	-	-	-	TFIIS_C
XP_028072993.1	4081.Solyc04g054510.2.1	4.52e-59	184.0	COG1594@1|root,KOG2907@2759|Eukaryota,37VWR@33090|Viridiplantae,3GKAJ@35493|Streptophyta,44K9P@71274|asterids	35493|Streptophyta	K	DNA-dependent RNA polymerase catalyzes the transcription of DNA into RNA using the four ribonucleoside triphosphates as substrates	-	-	-	ko:K03000	ko00230,ko00240,ko01100,ko03020,map00230,map00240,map01100,map03020	M00182	R00435,R00441,R00442,R00443	RC02795	br01611,ko00000,ko00001,ko00002,ko03021	-	-	-	TFIIS_C
lcl|ORF3_TRINITY_DN2660_c0_g1_i1_143_508	4081.Solyc04g054510.2.1	4.52e-59	184.0	COG1594@1|root,KOG2907@2759|Eukaryota,37VWR@33090|Viridiplantae,3GKAJ@35493|Streptophyta,44K9P@71274|asterids	35493|Streptophyta	K	DNA-dependent RNA polymerase catalyzes the transcription of DNA into RNA using the four ribonucleoside triphosphates as substrates	-	-	-	ko:K03000	ko00230,ko00240,ko01100,ko03020,map00230,map00240,map01100,map03020	M00182	R00435,R00441,R00442,R00443	RC02795	br01611,ko00000,ko00001,ko00002,ko03021	-	-	-	TFIIS_C
lcl|ORF1_TRINITY_DN25731_c0_g1_i1_145_510	4081.Solyc04g054510.2.1	4.52e-59	184.0	COG1594@1|root,KOG2907@2759|Eukaryota,37VWR@33090|Viridiplantae,3GKAJ@35493|Streptophyta,44K9P@71274|asterids	35493|Streptophyta	K	DNA-dependent RNA polymerase catalyzes the transcription of DNA into RNA using the four ribonucleoside triphosphates as substrates	-	-	-	ko:K03000	ko00230,ko00240,ko01100,ko03020,map00230,map00240,map01100,map03020	M00182	R00435,R00441,R00442,R00443	RC02795	br01611,ko00000,ko00001,ko00002,ko03021	-	-	-	TFIIS_C
lcl|ORF1_TRINITY_DN5553_c0_g1_i1_168_533	4081.Solyc04g054510.2.1	2.61e-58	182.0	COG1594@1|root,KOG2907@2759|Eukaryota,37VWR@33090|Viridiplantae,3GKAJ@35493|Streptophyta,44K9P@71274|asterids	35493|Streptophyta	K	DNA-dependent RNA polymerase catalyzes the transcription of DNA into RNA using the four ribonucleoside triphosphates as substrates	-	-	-	ko:K03000	ko00230,ko00240,ko01100,ko03020,map00230,map00240,map01100,map03020	M00182	R00435,R00441,R00442,R00443	RC02795	br01611,ko00000,ko00001,ko00002,ko03021	-	-	-	TFIIS_C
lcl|ORF2_TRINITY_DN12643_c0_g1_i1_172_537	4081.Solyc04g054510.2.1	4.52e-59	184.0	COG1594@1|root,KOG2907@2759|Eukaryota,37VWR@33090|Viridiplantae,3GKAJ@35493|Streptophyta,44K9P@71274|asterids	35493|Streptophyta	K	DNA-dependent RNA polymerase catalyzes the transcription of DNA into RNA using the four ribonucleoside triphosphates as substrates	-	-	-	ko:K03000	ko00230,ko00240,ko01100,ko03020,map00230,map00240,map01100,map03020	M00182	R00435,R00441,R00442,R00443	RC02795	br01611,ko00000,ko00001,ko00002,ko03021	-	-	-	TFIIS_C
lcl|ORF1_TRINITY_DN5569_c0_g3_i1_21_1127	4432.XP_010245288.1	1.5e-16	89.4	2AG8Y@1|root,2RYZD@2759|Eukaryota,37TRP@33090|Viridiplantae,3GI0E@35493|Streptophyta	35493|Streptophyta	-	-	-	-	-	-	-	-	-	-	-	-	-	-	-
lcl|ORF13_TRINITY_DN17069_c0_g1_i1_2369_396	71139.XP_010030074.1	2.9e-63	225.0	2AG8Y@1|root,2RYZD@2759|Eukaryota,37TRP@33090|Viridiplantae,3GI0E@35493|Streptophyta	35493|Streptophyta	-	-	-	-	-	-	-	-	-	-	-	-	-	-	-
lcl|ORF32_TRINITY_DN1571_c1_g1_i5_4410_2383	4432.XP_010245288.1	1.38e-93	308.0	2AG8Y@1|root,2RYZD@2759|Eukaryota,37TRP@33090|Viridiplantae,3GI0E@35493|Streptophyta	35493|Streptophyta	-	-	-	-	-	-	-	-	-	-	-	-	-	-	-
XP_028115103.1	71139.XP_010030074.1	1.56e-64	229.0	2AG8Y@1|root,2RYZD@2759|Eukaryota,37TRP@33090|Viridiplantae,3GI0E@35493|Streptophyta	35493|Streptophyta	-	-	-	-	-	-	-	-	-	-	-	-	-	-	-
lcl|ORF1_TRINITY_DN10545_c0_g4_i1_21_2048	71139.XP_010030074.1	4.08e-63	225.0	2AG8Y@1|root,2RYZD@2759|Eukaryota,37TRP@33090|Viridiplantae,3GI0E@35493|Streptophyta	35493|Streptophyta	-	-	-	-	-	-	-	-	-	-	-	-	-	-	-
lcl|ORF10_TRINITY_DN2453_c0_g2_i3_2056_2	71139.XP_010030074.1	1.83e-61	221.0	2AG8Y@1|root,2RYZD@2759|Eukaryota,37TRP@33090|Viridiplantae,3GI0E@35493|Streptophyta	35493|Streptophyta	-	-	-	-	-	-	-	-	-	-	-	-	-	-	-
lcl|ORF15_TRINITY_DN9930_c1_g1_i8_2940_907	71139.XP_010030074.1	3.06e-62	223.0	2AG8Y@1|root,2RYZD@2759|Eukaryota,37TRP@33090|Viridiplantae,3GI0E@35493|Streptophyta	35493|Streptophyta	-	-	-	-	-	-	-	-	-	-	-	-	-	-	-
lcl|ORF6_TRINITY_DN19405_c0_g1_i1_1209_235	29760.VIT_15s0021g01640.t01	9.45e-169	478.0	KOG2800@1|root,KOG2800@2759|Eukaryota,37ME3@33090|Viridiplantae,3GF2V@35493|Streptophyta	35493|Streptophyta	S	UPF0565 protein C2orf69 homolog	-	-	-	-	-	-	-	-	-	-	-	-	UPF0565
lcl|ORF5_TRINITY_DN11809_c0_g1_i1_1078_104	29760.VIT_15s0021g01640.t01	7.74e-168	476.0	KOG2800@1|root,KOG2800@2759|Eukaryota,37ME3@33090|Viridiplantae,3GF2V@35493|Streptophyta	35493|Streptophyta	S	UPF0565 protein C2orf69 homolog	-	-	-	-	-	-	-	-	-	-	-	-	UPF0565
lcl|ORF1_TRINITY_DN19946_c0_g1_i1_468_1394	29760.VIT_15s0021g01640.t01	1.24e-148	427.0	KOG2800@1|root,KOG2800@2759|Eukaryota,37ME3@33090|Viridiplantae,3GF2V@35493|Streptophyta	35493|Streptophyta	S	UPF0565 protein C2orf69 homolog	-	-	-	-	-	-	-	-	-	-	-	-	UPF0565
XP_028112328.1	29760.VIT_15s0021g01640.t01	1.64e-169	480.0	KOG2800@1|root,KOG2800@2759|Eukaryota,37ME3@33090|Viridiplantae,3GF2V@35493|Streptophyta	35493|Streptophyta	S	UPF0565 protein C2orf69 homolog	-	-	-	-	-	-	-	-	-	-	-	-	UPF0565
lcl|ORF3_TRINITY_DN3342_c2_g2_i1_119_1093	29760.VIT_15s0021g01640.t01	1.21e-164	468.0	KOG2800@1|root,KOG2800@2759|Eukaryota,37ME3@33090|Viridiplantae,3GF2V@35493|Streptophyta	35493|Streptophyta	S	UPF0565 protein C2orf69 homolog	-	-	-	-	-	-	-	-	-	-	-	-	UPF0565
lcl|ORF5_TRINITY_DN16303_c0_g1_i2_1178_204	29760.VIT_15s0021g01640.t01	3.14e-167	474.0	KOG2800@1|root,KOG2800@2759|Eukaryota,37ME3@33090|Viridiplantae,3GF2V@35493|Streptophyta	35493|Streptophyta	S	UPF0565 protein C2orf69 homolog	-	-	-	-	-	-	-	-	-	-	-	-	UPF0565
lcl|ORF5_TRINITY_DN10418_c0_g1_i2_1184_210	29760.VIT_15s0021g01640.t01	3.3e-169	479.0	KOG2800@1|root,KOG2800@2759|Eukaryota,37ME3@33090|Viridiplantae,3GF2V@35493|Streptophyta	35493|Streptophyta	S	UPF0565 protein C2orf69 homolog	-	-	-	-	-	-	-	-	-	-	-	-	UPF0565
lcl|ORF1_TRINITY_DN18749_c0_g1_i1_61_1035	29760.VIT_15s0021g01640.t01	1.9e-168	478.0	KOG2800@1|root,KOG2800@2759|Eukaryota,37ME3@33090|Viridiplantae,3GF2V@35493|Streptophyta	35493|Streptophyta	S	UPF0565 protein C2orf69 homolog	-	-	-	-	-	-	-	-	-	-	-	-	UPF0565
lcl|ORF11_TRINITY_DN14111_c0_g1_i14_1602_328	3760.EMJ12933	1.55e-252	699.0	COG1239@1|root,2QRUY@2759|Eukaryota,37HFP@33090|Viridiplantae,3GFY9@35493|Streptophyta,4JD71@91835|fabids	35493|Streptophyta	F	Involved in chlorophyll biosynthesis. Catalyzes the insertion of magnesium ion into protoporphyrin IX to yield Mg- protoporphyrin IX	CHLI	GO:0003674,GO:0003824,GO:0005575,GO:0005618,GO:0005622,GO:0005623,GO:0005737,GO:0006725,GO:0006778,GO:0006779,GO:0006807,GO:0008150,GO:0008152,GO:0009058,GO:0009507,GO:0009532,GO:0009536,GO:0009570,GO:0009719,GO:0009725,GO:0009735,GO:0009987,GO:0010007,GO:0010033,GO:0015994,GO:0015995,GO:0016462,GO:0016787,GO:0016817,GO:0016818,GO:0016851,GO:0016874,GO:0016887,GO:0017111,GO:0018130,GO:0019438,GO:…	6.6.1.1	ko:K03405	ko00860,ko01100,ko01110,map00860,map01100,map01110	-	R03877	RC01012	ko00000,ko00001,ko01000	-	-	-	Mg_chelatase
lcl|ORF1_TRINITY_DN19394_c0_g1_i1_19_1383	3760.EMJ12933	2.05e-251	697.0	COG1239@1|root,2QRUY@2759|Eukaryota,37HFP@33090|Viridiplantae,3GFY9@35493|Streptophyta,4JD71@91835|fabids	35493|Streptophyta	F	Involved in chlorophyll biosynthesis. Catalyzes the insertion of magnesium ion into protoporphyrin IX to yield Mg- protoporphyrin IX	CHLI	GO:0003674,GO:0003824,GO:0005575,GO:0005618,GO:0005622,GO:0005623,GO:0005737,GO:0006725,GO:0006778,GO:0006779,GO:0006807,GO:0008150,GO:0008152,GO:0009058,GO:0009507,GO:0009532,GO:0009536,GO:0009570,GO:0009719,GO:0009725,GO:0009735,GO:0009987,GO:0010007,GO:0010033,GO:0015994,GO:0015995,GO:0016462,GO:0016787,GO:0016817,GO:0016818,GO:0016851,GO:0016874,GO:0016887,GO:0017111,GO:0018130,GO:0019438,GO:…	6.6.1.1	ko:K03405	ko00860,ko01100,ko01110,map00860,map01100,map01110	-	R03877	RC01012	ko00000,ko00001,ko01000	-	-	-	Mg_chelatase
lcl|ORF11_TRINITY_DN6234_c1_g1_i1_1561_287	3760.EMJ12933	1.09e-252	699.0	COG1239@1|root,2QRUY@2759|Eukaryota,37HFP@33090|Viridiplantae,3GFY9@35493|Streptophyta,4JD71@91835|fabids	35493|Streptophyta	F	Involved in chlorophyll biosynthesis. Catalyzes the insertion of magnesium ion into protoporphyrin IX to yield Mg- protoporphyrin IX	CHLI	GO:0003674,GO:0003824,GO:0005575,GO:0005618,GO:0005622,GO:0005623,GO:0005737,GO:0006725,GO:0006778,GO:0006779,GO:0006807,GO:0008150,GO:0008152,GO:0009058,GO:0009507,GO:0009532,GO:0009536,GO:0009570,GO:0009719,GO:0009725,GO:0009735,GO:0009987,GO:0010007,GO:0010033,GO:0015994,GO:0015995,GO:0016462,GO:0016787,GO:0016817,GO:0016818,GO:0016851,GO:0016874,GO:0016887,GO:0017111,GO:0018130,GO:0019438,GO:…	6.6.1.1	ko:K03405	ko00860,ko01100,ko01110,map00860,map01100,map01110	-	R03877	RC01012	ko00000,ko00001,ko01000	-	-	-	Mg_chelatase
XP_028081050.1	3760.EMJ12933	2.69e-253	701.0	COG1239@1|root,2QRUY@2759|Eukaryota,37HFP@33090|Viridiplantae,3GFY9@35493|Streptophyta,4JD71@91835|fabids	35493|Streptophyta	F	Involved in chlorophyll biosynthesis. Catalyzes the insertion of magnesium ion into protoporphyrin IX to yield Mg- protoporphyrin IX	CHLI	GO:0003674,GO:0003824,GO:0005575,GO:0005618,GO:0005622,GO:0005623,GO:0005737,GO:0006725,GO:0006778,GO:0006779,GO:0006807,GO:0008150,GO:0008152,GO:0009058,GO:0009507,GO:0009532,GO:0009536,GO:0009570,GO:0009719,GO:0009725,GO:0009735,GO:0009987,GO:0010007,GO:0010033,GO:0015994,GO:0015995,GO:0016462,GO:0016787,GO:0016817,GO:0016818,GO:0016851,GO:0016874,GO:0016887,GO:0017111,GO:0018130,GO:0019438,GO:…	6.6.1.1	ko:K03405	ko00860,ko01100,ko01110,map00860,map01100,map01110	-	R03877	RC01012	ko00000,ko00001,ko01000	-	-	-	Mg_chelatase
lcl|ORF3_TRINITY_DN67_c0_g1_i19_2184_3458	3760.EMJ12933	5.42e-253	700.0	COG1239@1|root,2QRUY@2759|Eukaryota,37HFP@33090|Viridiplantae,3GFY9@35493|Streptophyta,4JD71@91835|fabids	35493|Streptophyta	F	Involved in chlorophyll biosynthesis. Catalyzes the insertion of magnesium ion into protoporphyrin IX to yield Mg- protoporphyrin IX	CHLI	GO:0003674,GO:0003824,GO:0005575,GO:0005618,GO:0005622,GO:0005623,GO:0005737,GO:0006725,GO:0006778,GO:0006779,GO:0006807,GO:0008150,GO:0008152,GO:0009058,GO:0009507,GO:0009532,GO:0009536,GO:0009570,GO:0009719,GO:0009725,GO:0009735,GO:0009987,GO:0010007,GO:0010033,GO:0015994,GO:0015995,GO:0016462,GO:0016787,GO:0016817,GO:0016818,GO:0016851,GO:0016874,GO:0016887,GO:0017111,GO:0018130,GO:0019438,GO:…	6.6.1.1	ko:K03405	ko00860,ko01100,ko01110,map00860,map01100,map01110	-	R03877	RC01012	ko00000,ko00001,ko01000	-	-	-	Mg_chelatase
lcl|ORF7_TRINITY_DN5753_c0_g1_i4_1446_172	3760.EMJ12933	1.81e-251	696.0	COG1239@1|root,2QRUY@2759|Eukaryota,37HFP@33090|Viridiplantae,3GFY9@35493|Streptophyta,4JD71@91835|fabids	35493|Streptophyta	F	Involved in chlorophyll biosynthesis. Catalyzes the insertion of magnesium ion into protoporphyrin IX to yield Mg- protoporphyrin IX	CHLI	GO:0003674,GO:0003824,GO:0005575,GO:0005618,GO:0005622,GO:0005623,GO:0005737,GO:0006725,GO:0006778,GO:0006779,GO:0006807,GO:0008150,GO:0008152,GO:0009058,GO:0009507,GO:0009532,GO:0009536,GO:0009570,GO:0009719,GO:0009725,GO:0009735,GO:0009987,GO:0010007,GO:0010033,GO:0015994,GO:0015995,GO:0016462,GO:0016787,GO:0016817,GO:0016818,GO:0016851,GO:0016874,GO:0016887,GO:0017111,GO:0018130,GO:0019438,GO:…	6.6.1.1	ko:K03405	ko00860,ko01100,ko01110,map00860,map01100,map01110	-	R03877	RC01012	ko00000,ko00001,ko01000	-	-	-	Mg_chelatase
lcl|ORF10_TRINITY_DN13584_c0_g1_i1_1532_258	3760.EMJ12933	1.09e-252	699.0	COG1239@1|root,2QRUY@2759|Eukaryota,37HFP@33090|Viridiplantae,3GFY9@35493|Streptophyta,4JD71@91835|fabids	35493|Streptophyta	F	Involved in chlorophyll biosynthesis. Catalyzes the insertion of magnesium ion into protoporphyrin IX to yield Mg- protoporphyrin IX	CHLI	GO:0003674,GO:0003824,GO:0005575,GO:0005618,GO:0005622,GO:0005623,GO:0005737,GO:0006725,GO:0006778,GO:0006779,GO:0006807,GO:0008150,GO:0008152,GO:0009058,GO:0009507,GO:0009532,GO:0009536,GO:0009570,GO:0009719,GO:0009725,GO:0009735,GO:0009987,GO:0010007,GO:0010033,GO:0015994,GO:0015995,GO:0016462,GO:0016787,GO:0016817,GO:0016818,GO:0016851,GO:0016874,GO:0016887,GO:0017111,GO:0018130,GO:0019438,GO:…	6.6.1.1	ko:K03405	ko00860,ko01100,ko01110,map00860,map01100,map01110	-	R03877	RC01012	ko00000,ko00001,ko01000	-	-	-	Mg_chelatase
lcl|ORF1_TRINITY_DN7581_c0_g1_i1_103_1377	3760.EMJ12933	1.09e-252	699.0	COG1239@1|root,2QRUY@2759|Eukaryota,37HFP@33090|Viridiplantae,3GFY9@35493|Streptophyta,4JD71@91835|fabids	35493|Streptophyta	F	Involved in chlorophyll biosynthesis. Catalyzes the insertion of magnesium ion into protoporphyrin IX to yield Mg- protoporphyrin IX	CHLI	GO:0003674,GO:0003824,GO:0005575,GO:0005618,GO:0005622,GO:0005623,GO:0005737,GO:0006725,GO:0006778,GO:0006779,GO:0006807,GO:0008150,GO:0008152,GO:0009058,GO:0009507,GO:0009532,GO:0009536,GO:0009570,GO:0009719,GO:0009725,GO:0009735,GO:0009987,GO:0010007,GO:0010033,GO:0015994,GO:0015995,GO:0016462,GO:0016787,GO:0016817,GO:0016818,GO:0016851,GO:0016874,GO:0016887,GO:0017111,GO:0018130,GO:0019438,GO:…	6.6.1.1	ko:K03405	ko00860,ko01100,ko01110,map00860,map01100,map01110	-	R03877	RC01012	ko00000,ko00001,ko01000	-	-	-	Mg_chelatase
lcl|ORF1_TRINITY_DN14078_c0_g1_i2_417_2261	3694.POPTR_0017s06350.1	2.32e-268	755.0	28I7G@1|root,2QQHQ@2759|Eukaryota,37RPF@33090|Viridiplantae,3GCJX@35493|Streptophyta,4JRDC@91835|fabids	35493|Streptophyta	-	-	-	-	-	-	-	-	-	-	-	-	-	-	-
lcl|ORF1_TRINITY_DN8766_c0_g1_i1_109_783	29760.VIT_05s0124g00580.t01	9.9e-110	333.0	28I7G@1|root,2QQHQ@2759|Eukaryota,37RPF@33090|Viridiplantae,3GCJX@35493|Streptophyta	35493|Streptophyta	-	-	-	-	-	-	-	-	-	-	-	-	-	-	-
lcl|ORF14_TRINITY_DN20817_c0_g1_i1_1480_293	29760.VIT_05s0124g00580.t01	3.91e-194	555.0	28I7G@1|root,2QQHQ@2759|Eukaryota,37RPF@33090|Viridiplantae,3GCJX@35493|Streptophyta	35493|Streptophyta	-	-	-	-	-	-	-	-	-	-	-	-	-	-	-
XP_028064762.1	4098.XP_009591982.1	3.66e-270	760.0	28I7G@1|root,2QQHQ@2759|Eukaryota,37RPF@33090|Viridiplantae,3GCJX@35493|Streptophyta,44DZM@71274|asterids	35493|Streptophyta	-	-	-	-	-	-	-	-	-	-	-	-	-	-	-
lcl|ORF9_TRINITY_DN1948_c0_g1_i2_452_2317	3694.POPTR_0017s06350.1	2.4e-272	766.0	28I7G@1|root,2QQHQ@2759|Eukaryota,37RPF@33090|Viridiplantae,3GCJX@35493|Streptophyta,4JRDC@91835|fabids	35493|Streptophyta	-	-	-	-	-	-	-	-	-	-	-	-	-	-	-
[truncated: 1,633 more rows]
