# Supplementary material for: Transcriptome and metabolome analyses provide insights into the relevance of pericarp thickness variations in Camellia drupifera and Camellia oleifera
Source: Front Plant Sci. 2022 Oct 27;13:1016475. doi: 10.3389/fpls.2022.1016475 (PMC9647060; doi:10.3389/fpls.2022.1016475)
Supplement: Supplementary Table 6 — Identified PODs and LACs in Camellia. [file Table_6.xlsx]

## Sheet: Sheet1
Identified PODs and LACs in Camellia.
gene_id	GN	BG_readcount	SG_readcount	log2FC(B/S)	pvalue	padj	NR_annotation	Swissprot_annotation	Pfam_annotation	BP_annotation	MF_annotation	CC_annotation	KO_annotation	Pathway_annotation
TR3265_c0_g1	POD1	560.77	0	11.6443	5.8288e-21	7.5655e-18	peroxidase 18-like [Camellia sinensis]	Peroxidase 18 OS=Arabidopsis thaliana OX=3702 GN=PER18 PE=3 SV=1	Peroxidase	-	-	-	K00430|E1.11.1.7; peroxidase [EC:1.11.1.7]	ko00940(Metabolism);ko01100(Metabolism);ko01110(Metabolism)	>TR3265_c0_g1 ORF type:complete; len:269 390-1196 (-) ATGGAAAAAAAACCCACTCTTGCTTCTTGTTATCCAACAGCTCATTTCCAAAAACTTCTT ATGCTTCTTGTCATCTTTATAGTTTCTTCTTCTTCCTCTTCTTCTTCTTCCAAACTCTCA TTCGACTTCTATGCAGCTTCATGCCCACCTGCCGAACTCATTGTTAGAAACACCGTCAGA TCAGCTTCTTCTGACGATCCTTCACTTCCCGGAAAGCTCCTTCGCTTGCTCTTCCATGAC TGCTTTGTTGAGGGTTGTGATGCATCTGTGCTTTTAGAGGGAAATAAAACAGAGAAAACC GATCCAGCAAACACATCTCTCGGAGGATTCTCAGTAATAA…
TR8591_c3_g1	POD2	840.41	296.74	1.5021	1.229e-06	0.00011548	peroxidase 47 [Camellia sinensis]	Peroxidase 47 OS=Arabidopsis thaliana OX=3702 GN=PER47 PE=2 SV=2	Peroxidase	-	-	-	K00430|E1.11.1.7; peroxidase [EC:1.11.1.7]	ko00940(Metabolism);ko01100(Metabolism);ko01110(Metabolism)	>TR8591_c3_g1 ORF type:complete; len:196 779-1366 (+) ATGGCTGCCCGCGATGCTGTTTTCTTTGCAGGGGGTCCAGTGTATGAGATACCAAAAGGA AGAAAGGATGGAAGAATATCAAAAATAGAAGACACAAGAAACCTCCCTCCTCCTTCCTTC AACACCTCCCAACTCATCACCATGTTTGCCCAACATGGCTTCTCTGCTCAAGAAATGGTT GCTTTATCTGGGGGACATACACTAGGAGTAGCAAGGTGCTCATCATTCAAATTTCGATTG AGCCATTTCGATTCAACTCACGATACCGATCCAACCCTAGACTCGAACTTCGCCAAGACA TTGTCAAAAACATGCAGTGCCGGTGACAACGCTGAGCAAA…
TR3935_c0_g3	POD3	2846.8	967.03	1.5579	3.7964e-05	0.0021284	peroxidase [Camellia oleifera]	Peroxidase 42 OS=Arabidopsis thaliana OX=3702 GN=PER42 PE=1 SV=2	Peroxidase;Peroxidase	-	-	-	K00430|E1.11.1.7; peroxidase [EC:1.11.1.7]	ko00940(Metabolism);ko01100(Metabolism);ko01110(Metabolism)	>TR3935_c0_g3 ORF type:complete; len:204 1195-1806 (-) ATGGGTTCCAAAGCTCTTTTCTTCTTTGCAATCTTATCCTTGTCAGTGTTGTTTTCTCTC AATCTCAACCTAGCTTTTGCAGAAAATGAGGAAATTGAAGAACAAGTTGGTCTGGTTATG AACTTCTACAAAGATACATGTCCTCAAGCTGAAGAAGTGATCAGAGAGCAAGTCAAGCTT CTCTACAAACGCCACAAGAACACTGCATTCTCATGGCTCAGAAACATCTTCCATGACTGT GCTGTTACGTCATGTGATGCTTCACTACTACTGGACTCGACAAGAAGGAGCTTATCTGAG AAGGAGACAGATAGGAGCTTTGGGCTGAGGAACTTTAGG…
TR1918_c3_g1	POD4	3132.03	1040.49	1.59	1.3432e-05	0.00089108	peroxidase 42-like [Camellia sinensis]	Peroxidase 42 OS=Arabidopsis thaliana OX=3702 GN=PER42 PE=1 SV=2	Peroxidase	-	-	-	K00430|E1.11.1.7; peroxidase [EC:1.11.1.7]	ko00940(Metabolism);ko01100(Metabolism);ko01110(Metabolism)	>TR1918_c3_g1 ORF type:5prime_partial; len:111 197-529 (-) CCTGACCATGTTGAGCACATGCTCCACAAGTGCCCGGACTCGATCCCCGACCCAAAAGCA GTCCAGTATGTGAGGAATGACAGGGGCACACCCATGGTACTAGACAACAACTACTACAGA AACATATTGGACAACAAAGGGTTGTTGATAGTGGATCACCAACTAGCCACAGACAAGAGG ACTAAGCCTTATGTGAAGAAAATGGCAAAGAGCCAAGACTACTTCTTCAAGGAGTTTGGA AGAGCCATCACTATTCTGTCTGAGAACAACCCTCTCACCGGCACTCAGGGTGAGATCAGA TTGCAATGCAATGTTGCCAACAAGCACCACTAG
TR16612_c0_g1	LAC15	52.01	6.41	3.0247	7.717e-05	0.0038586	laccase-15-like isoform X1 [Camellia sinensis]	Laccase-15 OS=Arabidopsis thaliana OX=3702 GN=TT10 PE=1 SV=1	Multicopper oxidase;Multicopper oxidase;Multicopper oxidase	-	-	-	-	-	>TR16612_c0_g1 ORF type:complete; len:262 1021-1806 (+) ATGCAGAAAAAAAAATCCACAGCCACTTCACCACCGCTATTTCCACACCTCCCGTACCAT AATGACACACGTGCCATGGTGAATTTCACCGGCAGCCTAAGAAGCTTGGGTAGCAAGGAC CATCCGGTCAATGTTCCATTAAAAATCACCACCCCTATGATCTCAACCGTCTTGCTCAAC ACCCTTCCGTGCCATCCCAACCGTACATGCTTGGGGCCGAATGGGACCCAATTGGCTGCG AGCATGAACAACTTAAGTTGGGTGAACCCATCCCTTGATATCCTCCAAGCTTACTATTAT CACATTAAGGGCGTGTTTGGGGATCGATTTCCGAACTT…
