# Supplementary material for: Transcriptome and metabolome analyses provide insights into the relevance of pericarp thickness variations in Camellia drupifera and Camellia oleifera
Source: Front Plant Sci. 2022 Oct 27;13:1016475. doi: 10.3389/fpls.2022.1016475 (PMC9647060; doi:10.3389/fpls.2022.1016475)
Supplement: Supplementary Table 7 — End product, upregulated DEGs, and 10 hub TFs of the coexpression net-work in lignin biosynthesis. [file Table_7.xlsx]

## Sheet: TFs_information
The end product, up-expression DEGs and 8 hub TFs of coexpression network in lignin biosynthesis.
gene_id	GN	type
TR13751_c3_g1	MLP328	TF-
TR3183_c0_g1	NCS2	TF-
TR72308_c1_g1	MYB62	TF+
TR15697_c1_g1	WIN1	TF+
TR5969_c0_g1	NAC29	TF+
TR712_c3_g1	SPT	TF+
TR14_c0_g1	WRKY44	TF+
TR11876_c0_g2	ERF38	TF+
TR3935_c0_g3	POD3	lig_gene
TR1918_c3_g1	POD4	lig_gene
TR8591_c3_g1	POD2	lig_gene
TR60905_c0_g1	CSE	lig_gene
TR3265_c0_g1	POD1	lig_gene
TR2697_c0_g1	COMT1	lig_gene
TR53190_c0_g1	C3'H	lig_gene
Sinapyl_alcohol	Sinapyl_alcohol	m

## Sheet: Correlation
name1	name2	r	p
TR60905_c0_g1	TR712_c3_g1	0.834787	0.038688
TR15697_c1_g1	TR3935_c0_g3	0.929047	0.00737295
TR5969_c0_g1	TR3935_c0_g3	0.92597	0.00801771
TR712_c3_g1	TR1918_c3_g1	0.988455	0.000199
TR3265_c0_g1	TR5969_c0_g1	0.826743	0.0424267
TR60905_c0_g1	TR14_c0_g1	0.960635	0.0022939
TR8591_c3_g1	TR14_c0_g1	0.813731	0.0488129
TR3265_c0_g1	TR14_c0_g1	0.848784	0.0325703
TR8591_c3_g1	TR15697_c1_g1	0.830703	0.040566
TR3265_c0_g1	TR15697_c1_g1	0.869239	0.0245296
TR60905_c0_g1	TR15697_c1_g1	0.954855	0.00301115
TR1918_c3_g1	TR14_c0_g1	0.963542	0.00196951
TR15697_c1_g1	TR1918_c3_g1	0.955566	0.00291775
TR5969_c0_g1	TR1918_c3_g1	0.960249	0.00233882
TR3265_c0_g1	TR712_c3_g1	0.950632	0.0035957
TR2697_c0_g1	TR14_c0_g1	0.893053	0.0165448
TR712_c3_g1	TR3935_c0_g3	0.99507	3.64e-05
TR8591_c3_g1	TR712_c3_g1	0.926296	0.0079483
TR60905_c0_g1	TR5969_c0_g1	0.883674	0.0195105
TR2697_c0_g1	TR15697_c1_g1	0.891152	0.0171271
TR14_c0_g1	TR3935_c0_g3	0.938216	0.005608
TR2697_c0_g1	Sinapyl_alcohol	0.49512	0.318008
TR8591_c3_g1	Sinapyl_alcohol	0.560569	0.247222
TR60905_c0_g1	Sinapyl_alcohol	0.601144	0.206903
TR3265_c0_g1	Sinapyl_alcohol	0.653567	0.159235
TR53190_c0_g1	Sinapyl_alcohol	0.693189	0.126759
TR3935_c0_g3	Sinapyl_alcohol	0.724631	0.103302
TR1918_c3_g1	Sinapyl_alcohol	0.742416	0.0909793
TR11876_c0_g2	TR8591_c3_g1	0.813333	0.0490148
TR60905_c0_g1	TR11876_c0_g2	0.857514	0.0290071
TR11876_c0_g2	TR2697_c0_g1	0.926893	0.00782156
TR15697_c1_g1	TR53190_c0_g1	0.956473	0.00280062
TR5969_c0_g1	TR53190_c0_g1	0.968878	0.00143782
TR712_c3_g1	TR53190_c0_g1	0.823295	0.0440781
TR14_c0_g1	TR53190_c0_g1	0.962589	0.00207314
TR72308_c1_g1	TR1918_c3_g1	0.944161	0.00458996
TR3265_c0_g1	TR72308_c1_g1	0.994214	5.01e-05
TR72308_c1_g1	TR8591_c3_g1	0.945991	0.0042966
TR72308_c1_g1	TR3935_c0_g3	0.946371	0.00423702
TR13751_c3_g1	TR1918_c3_g1	-0.953823	0.00314927
TR13751_c3_g1	TR3265_c0_g1	-0.859659	0.0281615
TR13751_c3_g1	TR53190_c0_g1	-0.852231	0.0311403
TR13751_c3_g1	TR8591_c3_g1	-0.896044	0.0156485
TR13751_c3_g1	TR2697_c0_g1	-0.902502	0.0137954
TR13751_c3_g1	TR3935_c0_g3	-0.957091	0.00272222
TR13751_c3_g1	TR60905_c0_g1	-0.936191	0.0059775
TR1918_c3_g1	TR3183_c0_g1	-0.969677	0.00136531
TR3265_c0_g1	TR3183_c0_g1	-0.886281	0.0186628
TR3183_c0_g1	TR53190_c0_g1	-0.829084	0.041322
TR8591_c3_g1	TR3183_c0_g1	-0.911977	0.0112809
TR2697_c0_g1	TR3183_c0_g1	-0.851912	0.0312713
TR3935_c0_g3	TR3183_c0_g1	-0.978843	0.000666677
TR60905_c0_g1	TR3183_c0_g1	-0.898349	0.0149742
