# Supplementary material for: Transcriptome and metabolome analyses provide insights into the relevance of pericarp thickness variations in Camellia drupifera and Camellia oleifera
Source: Front Plant Sci. 2022 Oct 27;13:1016475. doi: 10.3389/fpls.2022.1016475 (PMC9647060; doi:10.3389/fpls.2022.1016475)
Supplement: Supplementary Table 8 — Comparison of fruit phenotypic character-istics between two species of Camellia L. [file Table_8.xlsx]

## Sheet: TOTAL
Comparison of fruit phenotypic characteristics between two species of Camellia L.
sample	CD	LD	PT	FFW	PFW	PFW/FFW		Sample	280nm	lignin content (μg/ml)	model
SG	18.3	17.28	0.97	3.53	1.47	0.416431		SG-1	1.7	297.75	Abs
SG	NA	NA	NA	NA	NA	NA		SG-2	1.731	305.5	Abs
SG	20.19	18.94	1.25	4.33	1.87	0.431871		SG-3	1.729	305	Abs
SG	19.87	16.48	0.9	3.79	1.35	0.356201		BG-1	2.018	377.25	Abs
SG	17.7	16.71	1.5	3.36	1.49	0.443452		BG-2	2.035	381.5	Abs
SG	16.8	17.8	1.55	3.46	0.65	0.187861		BG-3	2.036	381.75	Abs
SG	19.13	16.92	1.18	2.86	1.38	0.482517
SG	17.27	17.04	1.68	3.22	1.37	0.425466
SG	19.21	17.58	0.91	4.06	1.7	0.418719
SG	20.66	16.8	1.23	3.8	1.6	0.421053
SG	18.01	17.12	1.23	3.54	1.58	0.446328
SG	19.03	17.59	1.23	3.64	1.84	0.505495
SG	17.47	17.15	1.48	3.67	1.42	0.386921
SG	18.38	17.16	0.89	4.05	1.76	0.434568
SG	19.28	17.14	1.37	3.91	1.67	0.42711
SG	19.36	16.51	1.03	3.35	1.41	0.420896
SG	18.7	15.84	1.7	3.08	1.31	0.425325
SG	22.27	18.11	1.22	4.79	2.19	0.457203
SG	21.8	18.12	1.09	4.61	1.82	0.394794
SG	19.32	17.29	1.13	4.06	1.72	0.423645
SG	17.68	15.8	0.94	2.73	1.01	0.369963
SG	19.86	16.17	0.96	3.53	1.56	0.441926
SG	19.08	16.72	1.44	3.65	1.62	0.443836
SG	18.95	16.83	1.34	3.46	1.44	0.416185
SG	19.41	15.77	1.11	3.14	1.46	0.464968
BG	46.88	46.99	4.44	46.97	30.19	0.642751
BG	52.44	46.98	5.03	64.86	40.97	0.631668
BG	46.46	43.45	5.57	49.94	28.61	0.572887
BG	49.59	44.01	4.2	59.4	36.09	0.607576
BG	48.48	40.78	5.98	53.73	33.44	0.622371
BG	49.09	39.45	5.52	50.94	32.15	0.631135
BG	47.89	41.09	3.03	49.45	29.75	0.601618
BG	51.33	43.67	4.31	62.88	37.17	0.591126
BG	46.55	42.97	4.49	52.94	31.57	0.596335
BG	48.97	43.41	4.4	56.66	35.69	0.629898
BG	49.3	41.62	4.18	51.89	32.53	0.626903
BG	50.07	45.02	5.2	67.04	38.29	0.571152
BG	46.9	43.94	5.72	51.46	43.13	0.838127
BG	50.04	42.76	6.22	56.39	35.89	0.63646
BG	49.14	43.23	3.45	57.29	32.03	0.559085
BG	46.89	42.96	5.12	51.82	33.85	0.653223
BG	47.65	43.64	4.91	55.37	34.5	0.623081
BG	48.65	41.56	5.07	52.76	35.37	0.670394
BG	45.04	43.59	5.29	48.23	40	0.829359
BG	47.08	43.24	3.97	51.21	41.54	0.81117
BG	48.67	40.01	4.41	49.73	30.46	0.612508
BG	50.41	47.47	6.11	66.49	40.03	0.602045
BG	46.62	40.9	6.08	46.76	41.3	0.883234
BG	51.75	40.4	5.39	60.63	34.19	0.563912
BG	49.42	42.23	4.37	57.27	36.35	0.634713
